# Supplementary material for: Characterization of cold stress responses in different rapeseed ecotypes based on metabolomics and transcriptomics analyses
Source: PeerJ. 2020 Mar 31;8:e8704. doi: 10.7717/peerj.8704 (PMC7120054; doi:10.7717/peerj.8704)
Supplement: Supplemental Information 3 [file peerj-08-8704-s003.xlsx]

## Sheet: S1
Table S1 Primers used for qRT-PCR in this study.
Gene ID	F	R	Functions
BnaA10g20420D	TTCAAAGAACATGATGTGTGCC	CGTTTATCATCTGTTCGTCCAC	beta-6 tubulin (TUB6)
BnaC07g34180D	TCCCAGAAGACACTGAGTTTTT	GATCCCTGCTACTTTTCCTGAT	chloroplast beta-amylase (CT-BMY)
BnaA03g56650D	CAAAGACACTGCATTGGATGAA	GCCTTTGTAGTGTCCTTATCCT	cold regulated 15b (COR15B)
BnaA08g16610D	AATGTCTGGAGAAGCTGAGTAC	TCTCATCCTTGAAAGTCACGAA	cold, circadian rhythm, and RNA binding 1 (CCR1)
BnaA09g31450D	TATCGTCTACAAAGTATGGGGC	GAAGGAAACACCAAAGGCTAAG	cold-regulated 413-plasma membrane 2 (COR413-PM2)
BnaC08g22210D	TGAGAAGACGATCTGGATTAGC	TCCTTCCTAGACGATACTCGAT	cold-regulated 413-plasma membrane 2 (COR413-PM2)
BnaC07g39680D	ATCAGCTTGTCTCAATTTTGCC	TGATCCGCCGTCGTATTATTTA	C-repeat/DRE binding factor 2 (CBF2)
BnaAnng34260D	CGAGGAGTCCATGTTAGAGATG	AAAAGGCAGAATCCGAAAATCC	C-repeat/DRE binding factor 2 (CBF2)
BnaC09g28190D	GGTGTGTTTTATATGGCCGAAG	GCCAAGTCGTTATGATTCCATC	C-repeat-binding factor 4 (CBF4)
BnaC09g49920D	ACTCTTCGGAGATGTTTGATGT	GAAGTCACTACCATCTTTTGCC	DRE-binding protein 2A (DREB2A)
BnaA04g11900D	TTATGGTGGTGGTGACAGTTAC	GTTCTCCGCACTTGTAACAAG	glycine-rich protein 2B (GRP2B)
BnaA10g27060D	AAGAGGACTCTTTCTTCCACTG	GAGCGCAGAGTAGAAATCAATG	heat shock cognate protein 70-1 (HSC70-1)
BnaA03g32320D	AACGAGAAGGTTCAAGATTTGC	CTTTGTCGGAATCGTAGTGTTC	heat shock protein 70 (HSP70)
BnaC04g46650D	AAATCCTGAAGCAGCTCTTTTG	CATTTTCCTTCACTTTCAGGCA	HIGH EXPRESSION OF OSMOTICALLY RESPONSIVE GENES 1 (HOS1)
BnaC02g36310D	TTCTGGTTTCCTCGGACATATC	TCTAACTCCAACGGTGTGAATC	INDUCER OF CBF EXPRESSION 1 (ICE1)
BnaA02g10970D	GCCGAAATCTCCAAATTCAGTT	GCTTTCACCGGAATCTGAAAAT	LOW-TEMPERATURE-INDUCED 65 (LTI65)
BnaA03g37010D	TCTTTTGAAAGCTTGTTCTCGG	CTTCAAGATTCGACGCGTAATT	myb domain protein 15 (MYB15)
BnaC01g01660D	AAGATCCGCCGACTTATCTAAG	TTCTCATTTACTTGAGTCGGCT	myb domain protein 73 (MYB73)
BnaA07g14320D	TGCAAAGAAGGTTTTTACTGGG	GATTGTTAAGGAACTGAGACGC	outer plastid envelope protein 16-1 (OEP16-1)
BnaC02g45160D	GCAGTGTGTTTTCTACATGTGT	ATAGACGATATCGACAAGGAGC	RESPONSIVE TO ABA 18 (RAB18)
BnaA05g12950D	TGGTGAATATACCTACCAACGG	TGTTTAGTGATCGTGTAAGGCT	REVEILLE 2 (RVE2)
BnaCnng20570D	GATCTGCAACAAGTCGTTCG	CTACTCGAGCCTCAGTTTCTTG	zinc finger of Arabidopsis thaliana 6 (ZAT6)
