# Supplementary material for: Characterization of cold stress responses in different rapeseed ecotypes based on metabolomics and transcriptomics analyses
Source: PeerJ. 2020 Mar 31;8:e8704. doi: 10.7717/peerj.8704 (PMC7120054; doi:10.7717/peerj.8704)
Supplement: Supplemental Information 4 [file peerj-08-8704-s004.xlsx]

## Sheet: S2
Table S2 Overview of transcriptome sequencing and mapping to the B. napus reference genome.
Sample	Total Reads	Unmapped Reads	Unique Mapped Reads	Multiple Mapped reads	Mapping Ratio
R-22S1	46947506	8704205 (18.54%)	37071369 (78.96%)	1171932 (2.50%)	0.8146
R-22S2	40910286	7426509 (18.15%)	32494623 (79.43%)	989154 (2.42%)	0.8185
R-22S3	42652766	7804490 (18.30%)	33769806 (79.17%)	1078470 (2.53%)	0.817
R-4S1	40156600	7135652 (17.77%)	32000618 (79.69%)	1020330 (2.54%)	0.8223
R-4S2	50207134	9084419 (18.09%)	39827751 (79.33%)	1294964 (2.58%)	0.8191
R-4S3	51420934	9179772 (17.85%)	40894706 (79.53%)	1346456 (2.62%)	0.8215
R-22W1	47590962	8675198 (18.23%)	37694658 (79.21%)	1221106 (2.57%)	0.8177
R-22W2	45680240	8754637 (19.17%)	35765139 (78.29%)	1160464 (2.54%)	0.8083
R-22W3	52135228	9430811 (18.09%)	41408905 (79.43%)	1295512 (2.48%)	0.8191
R-4W1	58439872	10944932 (18.73%)	46059610 (78.82%)	1435330 (2.46%)	0.8127
R-4W2	52647234	10028741 (19.05%)	41325137 (78.49%)	1293356 (2.46%)	0.8095
R-4W3	49573554	9387664 (18.94%)	38978930 (78.63%)	1206960 (2.43%)	0.8106
