# Supplementary material for: Characterization of cold stress responses in different rapeseed ecotypes based on metabolomics and transcriptomics analyses
Source: PeerJ. 2020 Mar 31;8:e8704. doi: 10.7717/peerj.8704 (PMC7120054; doi:10.7717/peerj.8704)
Supplement: Supplemental Information 5 [file peerj-08-8704-s005.xlsx]

## Sheet: S3
Table S3 Overview of all genes detected from 12 libraries by RNA-sequencing.
Gene ID	28S_fpkm	4S_fpkm	28W_fpkm	4W_fpkm	28S_count	4S_count	28W_count	4W_count	28S1_fpkm	28S2_fpkm	28S3_fpkm	4S1_fpkm	4S2_fpkm	4S3_fpkm	28W1_fpkm	28W2_fpkm	28W3_fpkm	4W1_fpkm	4W2_fpkm	4W3_fpkm	28S1_count	28S2_count	28S3_count	4S1_count	4S2_count	4S3_count	28W1_count	28W2_count	28W3_count	4W1_count	4W2_count	4W3_count
BnaA01g00010D	5.29	3.99	4.82	4.21	51	41.67	51.67	49.33	5.69	5.25	4.93	4.03	3.82	4.12	4.17	5.12	5.18	3.99	4.95	3.69	59	47	47	36	42	47	44	51	60	51	57	40
BnaA01g00020D	2.02	0.14	1.08	0.5	26	2	15.67	8	1.14	1.9	3.03	0.08	0.2	0.13	1.05	1.04	1.15	0.58	0.77	0.14	16	23	39	1	3	2	15	14	18	10	12	2
BnaA01g00030D	6.95	3.91	8.62	3.48	239.09	146.18	327.24	143.87	7.6	7.37	5.88	3.95	3.39	4.4	9.38	9.27	7.22	2.64	3.73	4.07	281.26	235.71	200.29	126.17	132.96	179.41	352.99	330.08	298.65	120.42	153.59	157.61
BnaA01g00040D	0	0	0	0	0	0	0	0	0	0	0	0	0	0	0	0	0	0	0	0	0	0	0	0	0	0	0	0	0	0	0	0
BnaA01g00050D	36.8	52.7	79.53	25.9	819.19	1284.56	1943.4	702.55	41.79	33.45	35.15	41.97	61.05	55.09	98.3	78.88	61.4	29.48	23.71	24.52	996.42	689.84	771.31	862.95	1544.81	1445.92	2384.78	1809.08	1636.35	866.71	628.48	612.45
BnaA01g00060D	4.48	1.38	2.63	2.37	77.74	26.33	51.33	50.63	4.16	5.93	3.34	1.41	1.05	1.68	2.71	2.53	2.65	2.19	3.15	1.77	78.48	96.78	57.95	23	21	35	52	46	56	50.88	66	35
BnaA01g00070D	0	0	0	0	0	0	0	0	0	0	0	0	0	0	0	0	0	0	0	0	0	0	0	0	0	0	0	0	0	0	0	0
BnaA01g00080D	2.12	1.07	4.05	1.45	20.67	10.33	43	17.33	2.89	2.22	1.25	2.23	0.45	0.52	4.73	4.5	2.93	1.79	1.82	0.73	30	20	12	20	5	6	50	45	34	23	21	8
BnaA01g00090D	0.09	0.03	0.07	0.06	3	1	2.67	2.33	0.14	0.1	0.03	0.03	0.03	0.03	0.11	0	0.1	0.07	0.08	0.03	5	3	1	1	1	1	4	0	4	3	3	1
BnaA01g00100D	6.82	1.88	9.19	4.68	147.3	43	219.6	122.81	7.01	6.67	6.77	2.74	0.41	2.5	9.48	9.79	8.3	4.4	5.22	4.41	163	134	144.91	55	10	64	224.21	219	215.58	126.03	135	107.41
BnaA01g00110D	0.01	0.01	0	0	0.33	0.33	0	0	0	0.03	0	0	0	0.03	0	0	0	0	0	0	0	1	0	0	0	1	0	0	0	0	0	0
BnaA01g00120D	2.41	0.52	4.8	0.99	38.7	8.67	85.5	19.01	2.48	3.39	1.36	0.93	0.11	0.52	4.61	5.69	4.09	0.48	1.33	1.15	43.24	51	21.86	14	2	10	81.58	95.27	79.64	10.36	25.66	21
BnaA01g00130D	1.26	0.26	1.86	0.37	14.26	3	23.67	5.33	0.88	1.93	0.96	0.56	0.15	0.07	2.05	2.17	1.37	0.46	0.51	0.15	11	20.79	11	6	2	1	26	26	19	7	7	2
BnaA01g00140D	21.5	1.46	6.72	2.52	405.67	29	143.19	57.78	20.08	30.24	14.17	2.37	0.46	1.55	5.22	7	7.94	2.03	2.19	3.35	412.36	536.96	267.69	42	10	35	109	138.3	182.27	51.33	50	72
BnaA01g00150D	0.42	0.02	0.17	0	7.33	0.33	3.26	0	0.65	0.31	0.29	0.06	0	0	0.25	0.22	0.05	0	0	0	12	5	5	1	0	0	4.78	4	1	0	0	0
BnaA01g00160D	0.03	0	0.11	0.03	0.33	0	1.33	0.33	0	0	0.09	0	0	0	0.25	0.09	0	0	0.08	0	0	0	1	0	0	0	3	1	0	0	1	0
BnaA01g00170D	520.37	325.93	587.02	428.51	14723	9744.27	18467.4	14757.5	463.44	559.97	537.69	476.58	202.17	299.03	669.55	589.85	501.67	391.14	419.06	475.32	14190.1	14828.7	15150.2	12585.1	6569.06	10078.7	20858.7	17372.9	17170.5	14765.7	14262	15244.8
BnaA01g00180D	8.98	2.08	8.82	3.31	184.19	45.78	201.37	81.62	9.22	10.1	7.63	2.62	1.16	2.46	8.97	8.7	8.78	2.54	3.34	4.04	204	193.21	155.35	50	27.33	60	201.95	185.17	217	69.28	82	93.59
BnaA01g00190D	9.24	9.72	8.92	21.79	300.41	330.46	320.04	862.85	9.99	9.63	8.1	14.85	5.55	8.77	8.28	10.32	8.15	22.19	22.1	21.09	349.37	291.2	260.65	447.81	206	337.57	294.51	347	318.62	956.86	859.13	772.57
BnaA01g00200D	18.27	8.8	22.08	19.04	415.48	209.39	557.06	530	18.93	18.02	17.87	13.56	3.78	9.07	23.19	21.85	21.21	21.66	18.25	17.21	463	381.22	402.21	286	98.13	244.05	577.19	514	580	653	496	441
BnaA01g00210D	64.6	26.5	71.63	40.93	2476.43	1055.67	3060.14	1919.53	66.13	70.18	57.48	43.47	13.39	22.64	70.23	70.93	73.72	44.36	38.53	39.89	2733.52	2509.11	2186.66	1549.7	587.3	1030	2953.73	2820.28	3406.41	2260.86	1770.3	1727.43
BnaA01g00220D	0	0	0	0	0	0	0	0	0	0	0	0	0	0	0	0	0	0	0	0	0	0	0	0	0	0	0	0	0	0	0	0
BnaA01g00230D	0.06	0	0	0	1	0	0	0	0.06	0	0.13	0	0	0	0	0	0	0	0	0	1	0	2	0	0	0	0	0	0	0	0	0
BnaA01g00240D	0	0	0	0	0	0	0	0	0	0	0	0	0	0	0	0	0	0	0	0	0	0	0	0	0	0	0	0	0	0	0	0
BnaA01g00250D	0	0	0	0	0	0	0	0	0	0	0	0	0	0	0	0	0	0	0	0	0	0	0	0	0	0	0	0	0	0	0	0
BnaA01g00260D	1.99	1.73	1.51	1.93	11.33	10	9.67	13.67	2.1	3.17	0.7	3.56	0.91	0.73	0.48	2.18	1.88	2.36	1.74	1.7	13	17	4	19	6	5	3	13	13	18	12	11
BnaA01g00270D	2.39	0.26	1.48	0.84	57.1	6.61	39.89	25.21	0.69	2.06	4.42	0.32	0.26	0.19	1.52	1.63	1.3	0.91	1.19	0.41	18	46.7	106.61	7.31	7.12	5.39	40.56	41.1	38	29.48	34.81	11.35
BnaA01g00280D	9.83	16.89	15.51	30.62	291.29	528.94	504.74	1100.55	9.94	8.97	10.57	23.85	7.61	19.22	17.09	17.94	11.51	28.75	32.07	31.04	316.89	247.07	309.9	655.44	257.34	674.04	554.17	550	410.05	1129.47	1136	1036.19
BnaA01g00290D	1.32	0.09	1.51	0.09	41.7	3.04	52.58	3.52	1.17	1.01	1.77	0.1	0.03	0.13	1.98	1.53	1.03	0.07	0.17	0.03	39.71	29.82	55.57	3	1.11	5	68.57	49.95	39.22	3	6.56	1
BnaA01g00300D	0.55	0.19	0.72	0.37	12.17	4.33	17.17	9.67	0.76	0.05	0.85	0.3	0.04	0.24	0.72	0.76	0.68	0.32	0.54	0.25	17.52	1	18	6	1	6	17	17	17.5	9	14	6
BnaA01g00310D	2.32	1.22	1.97	4.66	27.33	15.33	26.16	66.66	2.93	2.65	1.37	1.56	0.45	1.65	1.55	1.69	2.68	4.27	5.59	4.13	37	29	16	17	6	23	20	20.62	37.87	66.65	78.6	54.74
BnaA01g00320D	1.22	15.78	3.45	41.99	32.78	447.13	102.25	1364.54	1.43	1.18	1.06	21.58	7.56	18.2	4.31	2.96	3.08	42.27	41.14	42.56	41	29.34	28	535	230.56	575.83	126	81.76	99	1497.8	1314.36	1281.46
BnaA01g00330D	0	0.12	0	0	0	0.33	0	0	0	0	0	0.2	0	0.16	0	0	0	0	0	0	0	0	0	0.5	0	0.5	0	0	0	0	0	0
BnaA01g00340D	2.8	0.39	1.06	0.74	88.19	12.33	37.11	28.68	3.3	2.38	2.73	0.69	0.28	0.19	1.29	0.78	1.12	1.05	0.63	0.54	110.91	69.18	84.48	20	10	7	44	25.31	42.03	43.65	23.39	19
BnaA01g00350D	0	0.12	0	0	0	0.33	0	0	0	0	0	0.2	0	0.16	0	0	0	0	0	0	0	0	0	0.5	0	0.5	0	0	0	0	0	0
BnaA01g00360D	0.21	0	0.08	0.11	4.48	0	1.67	2.67	0.27	0.05	0.32	0	0	0	0	0.23	0	0	0.24	0.09	6	1	6.45	0	0	0	0	5	0	0	6	2
BnaA01g00370D	0.56	0	1.05	0	10.16	0	21.67	0	0.25	0.55	0.87	0	0	0	1.22	1.09	0.85	0	0	0	5	9.47	16	0	0	0	25	21	19	0	0	0
BnaA01g00380D	15.08	1.92	12.84	3.71	618.48	84.17	585	185.33	15.96	16.46	12.83	2.42	0.58	2.75	12.02	13.65	12.86	3.58	4.34	3.2	705	628.89	521.56	92	27	133.5	540	580	635	195	213	148
BnaA01g00390D	60.05	13.47	49.48	13.42	1622.2	386.67	1498.31	441.09	55.65	64.48	60.02	18.9	6.49	15.03	44.75	48.31	55.39	11.82	15.08	13.35	1625.16	1628.46	1612.99	476	201	483	1329.57	1357.13	1808.23	425.53	489.4	408.34
BnaA01g00400D	0.02	0.02	0.58	0.02	0.33	0.33	10.33	0.33	0.05	0	0	0.06	0	0	0	1.73	0	0	0.05	0	1	0	0	1	0	0	0	31	0	0	1	0
BnaA01g00410D	2.78	0.03	2.19	0.13	59.67	0.67	50.67	3.33	4.4	2.75	1.2	0.05	0	0.04	1.38	3.43	1.77	0.18	0.08	0.13	100	54	25	1	0	1	32	75	45	5	2	3
BnaA01g00420D	12.26	4.07	12.46	4.85	325.68	118.33	365.06	155	13.37	11.68	11.73	3.9	1.95	6.37	14.77	12.1	10.5	3.66	5.73	5.17	381.19	288.08	307.76	96	59	200	428.63	331.89	334.65	128.85	181.79	154.37
BnaA01g00430D	0.29	0.07	0.27	0.13	6.17	1.58	6.44	3.33	0.33	0.25	0.28	0.05	0	0.15	0.34	0.27	0.21	0.11	0.24	0.04	7.52	5	6	1	0	3.73	8	6	5.33	3	6	1
BnaA01g00440D	5.06	2.71	5.04	3.62	279.27	159.86	310.25	241.49	4.95	5.34	4.9	3.58	1.29	3.27	5.19	4.69	5.23	3.04	4	3.81	294.71	274.73	268.36	183.5	81.7	214.39	313.93	268.67	348.15	222.77	264.49	237.2
BnaA01g00450D	1.68	0.57	3.41	0.81	21.67	8	47.33	12.33	1.89	0.93	2.21	0.51	0.48	0.73	3.65	4.62	1.95	0.53	0.72	1.18	26	11	28	6	7	11	51	61	30	9	11	17
BnaA01g00460D	1.49	1.79	3.89	2.12	45.7	61.7	133.19	79.58	1.6	1.89	0.99	0.91	2.26	2.2	2.92	4.18	4.56	2.21	2.28	1.87	52.85	54	30.25	25.94	79.16	80	98.01	133.01	168.56	90.17	83.76	64.8
BnaA01g00470D	0	0	0	0	0	0	0	0	0	0	0	0	0	0	0	0	0	0	0	0	0	0	0	0	0	0	0	0	0	0	0	0
BnaA01g00480D	1.63	0.22	2.12	1.92	26.64	3.76	38.7	39.64	1.61	1.26	2.02	0.34	0	0.31	4.13	0.42	1.8	3.4	1.6	0.77	28.21	19.09	32.63	5.19	0	6.08	73.79	7.07	35.25	73.52	31.25	14.15
BnaA01g00490D	0	0	0	0	0	0	0	0	0	0	0	0	0	0	0	0	0	0	0	0	0	0	0	0	0	0	0	0	0	0	0	0
BnaA01g00500D	1.02	0.21	1.29	0.29	22.56	5	32.12	7.67	1.01	1.46	0.6	0.34	0	0.3	1.5	1.05	1.32	0.17	0.37	0.32	24.18	30.29	13.2	7	0	8	36.54	24.29	35.52	5	10	8
BnaA01g00510D	0.03	1.56	0.26	0.31	0.71	36.37	6.52	8.8	0	0.1	0	2.91	0.94	0.83	0.17	0.33	0.28	0.56	0	0.36	0	2.12	0	62	24.65	22.46	4.15	7.72	7.68	17	0	9.41
BnaA01g00520D	0	27.93	4.56	0.01	0	758.74	121.49	0.41	0	0	0	0.06	79.08	4.65	0.69	6	6.98	0.04	0	0	0	0	0	1.22	2144.15	130.86	17.83	147.4	199.23	1.24	0	0
BnaA01g00530D	0	0	0	0	0	0	0	0	0	0	0	0	0	0	0	0	0	0	0	0	0	0	0	0	0	0	0	0	0	0	0	0
BnaA01g00540D	0	0	0	0	0	0	0	0	0	0	0	0	0	0	0	0	0	0	0	0	0	0	0	0	0	0	0	0	0	0	0	0
BnaA01g00550D	0	0	0	0	0	0	0	0	0	0	0	0	0	0	0	0	0	0	0	0	0	0	0	0	0	0	0	0	0	0	0	0
BnaA01g00560D	0	0	0	0	0	0	0	0	0	0	0	0	0	0	0	0	0	0	0	0	0	0	0	0	0	0	0	0	0	0	0	0
BnaA01g00570D	1.38	0.61	1.89	0.89	30.69	13.73	46.58	24.22	1.16	1.92	1.07	1.28	0.24	0.31	1.94	2.51	1.23	0.8	1.07	0.79	28	40.15	23.91	26.81	6.1	8.27	47.9	58.51	33.34	24	28.67	20
BnaA01g00580D	0.52	0.02	0.24	0.25	15.18	0.67	7.67	8.67	0.48	0.39	0.69	0.04	0	0.03	0	0.46	0.26	0.1	0.34	0.3	15	10.54	20	1	0	1	0	14	9	4	12	10
BnaA01g00590D	14.42	3.9	6.4	3.16	295.67	89	147	78.67	13.13	15.12	15	2.88	3.36	5.45	4.83	6.94	7.42	2.49	3.81	3.19	291	290	306	55	79	133	109	148	184	68	94	74
BnaA01g00600D	6.22	1.35	9.62	1.62	153.51	35.67	263.67	48.94	8.07	5.54	5.04	1.5	1.32	1.24	9.58	7.88	11.39	1.89	1.86	1.12	212.42	126.17	121.95	34	37	36	256.52	199.51	334.97	61.41	54.4	31
BnaA01g00610D	87.51	11.58	46.72	41.14	1013.85	145.27	603.88	582.37	81.02	77.21	104.3	13.16	4.51	17.08	53.76	39.06	47.35	45.1	37.45	40.86	1010.88	833.16	1197.51	141.6	59.66	234.54	682.49	468.81	660.34	693.71	519.38	534.03
BnaA01g00620D	0	0.02	0	0	0	0.33	0	0	0	0	0	0.07	0	0	0	0	0	0	0	0	0	0	0	1	0	0	0	0	0	0	0	0
BnaA01g00630D	0.09	0	0.29	0.33	0.33	0	1.33	1.67	0	0.26	0	0	0	0	0.87	0	0	0.18	0.8	0	0	1	0	0	0	0	4	0	0	1	4	0
BnaA01g00640D	0	0	0	0	0	0	0	0	0	0	0	0	0	0	0	0	0	0	0	0	0	0	0	0	0	0	0	0	0	0	0	0
BnaA01g00650D	13.11	8.98	11.47	17.51	245.33	180.6	238.94	396.55	13.22	12.83	13.29	10.34	7.11	9.48	11.06	11.37	11.99	15.19	18.91	18.44	266.27	223.46	246.25	179.6	152	210.2	226.59	220.36	269.87	377.17	423.37	389.11
BnaA01g00660D	13.99	6.88	17.26	10.99	614.28	317.89	840.61	588.52	12.82	14.68	14.48	10.57	2.94	7.14	17.58	19.03	15.17	10.41	11.44	11.12	608.48	602.2	632.15	432.54	148.04	373.1	848.72	868.75	804.37	609.16	603.49	552.91
BnaA01g00670D	41.14	6.49	26.68	9.32	677.72	113.63	493.3	189.82	37.13	43.74	42.54	8.93	4.67	5.88	13.42	32.47	34.14	11.33	9.15	7.47	661.59	674.01	697.55	137.23	88.3	115.36	243.26	556.57	680.08	248.96	181.13	139.38
BnaA01g00680D	0.85	0.68	1.1	0.22	31.61	26.67	43.56	9.33	1.22	0.25	1.09	0.83	0.22	1	1.06	1.52	0.73	0.1	0.3	0.25	47.46	8.37	39	28	9	43	41.95	56.8	31.92	5	13	10
BnaA01g00690D	0.11	0	0.02	0.02	2.33	0	0.33	0.67	0.04	0.05	0.24	0	0	0	0	0.05	0	0.07	0	0	1	1	5	0	0	0	0	1	0	2	0	0
BnaA01g00700D	3.12	0.86	2.34	1.62	128.67	38.79	106.21	80.73	3.31	2.99	3.07	0.83	0.63	1.13	2.36	2.71	1.95	1.51	1.53	1.81	146.4	114.49	125.11	31.64	29.68	55.04	106.26	115.64	96.73	82.69	75.32	84.18
BnaA01g00710D	0.21	0.91	0.51	1.57	2	9	5.33	18	0.3	0.23	0.11	1.26	0.56	0.9	0.78	0.41	0.35	1.44	1.86	1.41	3	2	1	11	6	10	8	4	4	18	21	15
BnaA01g00720D	0	0	0	0	0	0	0	0	0	0	0	0	0	0	0	0	0	0	0	0	0	0	0	0	0	0	0	0	0	0	0	0
BnaA01g00730D	0.34	0	0.43	0.1	6.67	0	9.67	2.33	0.43	0.17	0.41	0	0	0	0.39	0.15	0.75	0.12	0.09	0.09	9	3.02	8	0	0	0	8.38	3	17.63	3	2	2
BnaA01g00740D	37.55	0.26	11.94	5.9	630.49	4.67	226.65	117.03	35.53	44.36	32.77	0.38	0.16	0.25	0.76	16.41	18.65	1.48	8.07	8.14	645.9	697.43	548.15	6	3	5	14	287	378.94	33.08	163	155
BnaA01g00750D	0	0	0	0	0	0	0	0	0	0	0	0	0	0	0	0	0	0	0	0	0	0	0	0	0	0	0	0	0	0	0	0
BnaA01g00760D	5.79	2.31	4.92	0.36	126.41	52.33	120.67	9.33	5.29	6.47	5.61	3.97	1.08	1.88	5.9	3.83	5.03	0.1	0.69	0.28	125	132.24	122	81	27	49	142	87	133	3	18	7
BnaA01g00770D	14.11	3.05	11.21	5.87	458.67	105.33	402.27	231.67	15.55	12.74	14.03	3.99	1.68	3.49	11.71	11.46	10.46	5.66	6.76	5.2	542	384	450	120	62	134	415.13	384.16	407.51	243	262	190
BnaA01g00780D	35.86	11.75	60.77	32.9	516.01	179.35	975.25	573.83	33.34	41.77	32.47	16.59	7.86	10.79	55.46	67.02	59.82	25.35	37.59	35.75	519.54	562.9	465.59	223	130	185.05	879.25	1004.61	1041.89	487	651	583.48
BnaA01g00790D	5.19	4.77	5.06	0.95	126.35	129.81	138.31	28.85	5.43	6.74	3.39	2.74	8.26	3.3	3.86	5.44	5.88	1.26	0.83	0.76	143.16	153.64	82.24	62.39	231.22	95.81	103.54	138.11	173.27	41.1	24.39	21.06
BnaA01g00800D	16.22	4.61	17.73	9.2	314.89	91.81	381.67	217.94	15.88	16.32	16.46	8.36	1.68	3.79	16.38	19.78	17.03	9.57	8.54	9.5	332.34	295.32	317	150.88	37.29	87.27	348.7	398.05	398.25	247	198.56	208.27
BnaA01g00810D	0	0	0	0	0	0	0	0	0	0	0	0	0	0	0	0	0	0	0	0	0	0	0	0	0	0	0	0	0	0	0	0
BnaA01g00820D	0	0	0	0	0	0	0	0	0	0	0	0	0	0	0	0	0	0	0	0	0	0	0	0	0	0	0	0	0	0	0	0
BnaA01g00830D	0	0	0	0	0	0	0	0	0	0	0	0	0	0	0	0	0	0	0	0	0	0	0	0	0	0	0	0	0	0	0	0
BnaA01g00840D	0	0	0	0	0	0	0	0	0	0	0	0	0	0	0	0	0	0	0	0	0	0	0	0	0	0	0	0	0	0	0	0
BnaA01g00850D	8.58	1.24	9.57	1.07	268.11	42.4	333.18	40.85	8.11	9.21	8.42	1.29	0.71	1.72	10.62	9.14	8.95	1.2	0.53	1.49	273.94	268.86	261.54	37.67	25.52	64	364.9	296.97	337.67	50	20	52.54
BnaA01g00860D	1.85	1.69	4.51	2.95	21.71	21.33	58.76	42	1.58	1.82	2.15	2.01	1.34	1.72	6.91	3.52	3.1	2.68	2.27	3.91	20	20	25.12	22	18	24	89.28	43	44	42	32	52
BnaA01g00870D	0.49	0.01	0.23	0.03	14.33	0.33	7.28	1	0.55	0.19	0.74	0	0	0.03	0.22	0.33	0.15	0	0.03	0.06	17	5	21	0	0	1	7	9.83	5	0	1	2
BnaA01g00880D	3.11	0.39	2.45	0.72	64.67	9	57.1	18.33	2.66	3.84	2.84	0.36	0.08	0.72	2	2.73	2.61	0.65	0.84	0.68	60	75	59	7	2	18	46	59.3	66	18	21	16
BnaA01g00890D	2.92	0.49	2.92	0.71	72.24	13	80.08	21	2.76	2.61	3.38	0.57	0.28	0.61	3.28	3	2.49	0.46	0.88	0.79	73.48	60.21	83.03	13	8	18	89	77	74.25	15	26	22
BnaA01g00900D	11.64	8.13	7.11	6.21	167.91	120.95	112.72	111.33	12.47	12.73	9.73	13.66	5.49	5.23	6.24	9.3	5.79	9.14	4.34	5.16	193.65	171	139.09	182.99	90.52	89.35	98.63	139	100.53	175	75	84
BnaA01g00910D	0	0.01	0	0	0	0.33	0	0	0	0	0	0	0.03	0	0	0	0	0	0	0	0	0	0	0	1	0	0	0	0	0	0	0
BnaA01g00920D	1.71	0.38	0.31	0.77	33.33	7.33	7.04	18.67	1.15	0.88	3.11	0.77	0.27	0.09	0.05	0.2	0.68	0.77	1.37	0.18	24	16	60	14	6	2	1	4.12	16	20	32	4
BnaA01g00930D	52.94	27.6	63.6	31.45	841.59	462.5	1125.45	603.74	52.22	56.49	50.11	40.78	13.68	28.35	74.89	57.25	58.66	25.58	31.72	37.04	895.78	838	791	603.34	248.93	535.22	1307.05	944.58	1124.72	541.07	604.68	665.46
BnaA01g00940D	3.51	0.92	1.58	0.64	69.67	19.67	35.67	15.33	3.32	3.08	4.12	1.19	0.13	1.45	1.93	0.68	2.14	0.61	0.76	0.54	71	57	81	22	3	34	42	14	51	16	18	12
BnaA01g00950D	0	0	0	0	0	0	0	0	0	0	0	0	0	0	0	0	0	0	0	0	0	0	0	0	0	0	0	0	0	0	0	0
BnaA01g00960D	1.39	1.42	0.88	2.28	15	15.67	10.67	30	0.51	0.88	2.77	2.86	0.32	1.08	0.84	0.8	0.99	2	2.07	2.76	6	9	30	29	4	14	10	9	13	29	27	34
BnaA01g00970D	4.03	1.16	3.25	1.84	97.38	29.72	87.79	54	3.68	3.75	4.65	1.62	0.72	1.14	2.89	3.3	3.56	1.66	1.8	2.06	96	84.58	111.56	36.43	20	32.73	76.65	82.82	103.89	53.57	52.09	56.35
BnaA01g00980D	6.94	2.22	8.56	5.86	274.11	93.32	379.7	283.67	6.58	7.77	6.46	3.09	1.06	2.51	8.13	8.03	9.52	5.67	6.54	5.38	281.17	287.14	254.03	113.81	48.16	118	353.65	330.44	455	299	311	241
BnaA01g00990D	5.22	1.49	3.53	1.65	170.17	52.71	128.24	65.46	5.24	5.52	4.89	1.72	0.64	2.12	3.16	3.83	3.61	1.54	1.97	1.43	184.24	168	158.26	52.11	24	82.03	113.2	129.76	141.77	66.75	76.92	52.72
BnaA01g01000D	0	0	0	0.06	0	0	0	1.33	0	0	0	0	0	0	0	0	0	0	0.18	0	0	0	0	0	0	0	0	0	0	0	4	0
BnaA01g01010D	0.08	0.13	0.02	0.02	1.33	2.19	0.33	0.33	0.06	0	0.18	0.23	0	0.15	0.05	0	0	0	0.05	0	1	0	3	3.57	0	3	1	0	0	0	1	0
BnaA01g01020D	16.37	3.14	18.18	4.09	335.75	69.11	413.16	102.21	16.02	17.68	15.42	4.06	1.06	4.3	18.87	19.62	16.04	3.87	4.69	3.7	354.66	338.52	314.08	77.48	25	104.84	424.9	417.73	396.86	105.6	115.31	85.73
BnaA01g01030D	4.46	0.79	2.56	1.11	103.28	19.67	66.05	30.93	4.13	4.18	5.08	0.88	0.94	0.55	1.73	2.97	2.97	0.81	1.18	1.34	103	90.16	116.67	19	25	15	44	71.33	82.81	25	32.78	35
BnaA01g01040D	56.71	4.18	38.6	6.43	1198.55	94.01	913.22	167.49	53.16	58.43	58.54	5.64	2.52	4.38	25.67	43.58	46.54	7.47	6.72	5.1	1213.16	1153.19	1229.3	111.03	61	110	596	956.54	1187.11	210.03	170.43	122
BnaA01g01050D	0	0	0	0	0	0	0	0	0	0	0	0	0	0	0	0	0	0	0	0	0	0	0	0	0	0	0	0	0	0	0	0
BnaA01g01060D	0	0	0	0	0	0	0	0	0	0	0	0	0	0	0	0	0	0	0	0	0	0	0	0	0	0	0	0	0	0	0	0
BnaA01g01070D	2.14	1.42	3.22	2.01	69.5	48.22	115.65	79.27	2.23	2.57	1.61	2.24	0.72	1.29	3.17	3.99	2.51	1.75	1.99	2.28	78.5	77.99	52	67.76	26.91	50	113.39	134.83	98.72	75.89	77.92	84
BnaA01g01080D	4.99	2.22	5.51	5.91	63	29	77.67	90.33	4.52	6.4	4.04	3.89	1.58	1.19	4.66	6.59	5.28	3.72	7.47	6.54	62	76	51	46	23	18	65	87	81	63	114	94
BnaA01g01090D	0	0	0	0.02	0	0	0	0.33	0	0	0	0	0	0	0	0	0	0.06	0	0	0	0	0	0	0	0	0	0	0	1	0	0
BnaA01g01100D	19.97	24.61	12.2	41.49	353.97	448.92	240.87	890.34	21.79	17.28	20.83	41.29	13.79	18.76	10.77	11.47	14.35	41.07	40.87	42.53	413.99	283.83	364.08	676.46	278	392.29	208.2	209.63	304.77	961.9	862.93	846.18
BnaA01g01110D	0.03	0.31	0.09	0.65	0.33	3.17	1	7.9	0	0	0.1	0.49	0.26	0.17	0.27	0	0	0.69	0.25	1.02	0	0	1	4.57	2.93	2	3	0	0	9.18	3	11.52
BnaA01g01120D	3.63	13.39	3.8	28.5	84.62	322.33	97.33	809	4.33	3.78	2.78	21.67	8.64	9.85	4.29	4.08	3.04	30.77	29.31	25.41	108.22	81.63	64	467	229	271	109	98	85	948	814	665
BnaA01g01130D	0	0	0	0	0	0	0	0	0	0	0	0	0	0	0	0	0	0	0	0	0	0	0	0	0	0	0	0	0	0	0	0
BnaA01g01140D	0.07	0	0.04	0.14	1.67	0	1	3.67	0.08	0.09	0.04	0	0	0	0	0.08	0.04	0.07	0.11	0.23	2	2	1	0	0	0	0	2	1	2	3	6
BnaA01g01150D	5.3	0.85	6.88	1.57	73.96	13.33	108.59	27.04	3.9	4.74	7.25	0.54	0.75	1.26	5.07	6.53	9.04	1.78	1.78	1.14	59	62	100.87	7	12	21	78	95	152.78	33.11	30	18
BnaA01g01160D	0	0	0	0	0	0	0	0	0	0	0	0	0	0	0	0	0	0	0	0	0	0	0	0	0	0	0	0	0	0	0	0
BnaA01g01170D	5.32	5.14	5.03	10.75	89	91.34	94	219	4.82	5.06	6.08	7.19	2.45	5.79	4.52	5.18	5.4	10.02	11.91	10.31	87	79	101	112	47.02	115	83	90	109	223	239	195
BnaA01g01180D	5.29	6.38	5.06	11.68	113.67	146.83	121.93	305.1	4.79	4.99	6.1	7.98	4.07	7.1	4.88	4.39	5.91	10.62	13.05	11.38	111	100	130	159.47	100.03	181	115	97.79	153	303.23	335.97	276.1
BnaA01g01190D	0.15	0	0.29	0.06	1.47	0	2.87	0.67	0.46	0	0	0	0	0	0	0.48	0.4	0	0.09	0.1	4.42	0	0	0	0	0	0	4.38	4.23	0	1	1
BnaA01g01200D	0.14	0.05	0.2	0	0.76	0.33	1.31	0	0.17	0	0.24	0	0.16	0	0	0	0.6	0	0	0	1	0	1.28	0	1	0	0	0	3.92	0	0	0
BnaA01g01210D	3.14	0.5	1.45	0.43	189.97	34	98.2	31.67	2.96	3.23	3.24	0.36	0.43	0.72	1.84	1.08	1.43	0.36	0.52	0.42	192.99	182.17	194.74	20	30	52	122	68.15	104.45	29	37.58	28.43
BnaA01g01220D	14.39	0.16	3.59	0.51	83.87	1	23.8	3.62	14.47	22.74	5.96	0.18	0	0.29	0	5.09	5.69	0.26	0.67	0.61	91.9	124.87	34.83	1	0	2	0	31.06	40.35	2	4.76	4.09
BnaA01g01230D	36.91	1.37	1.88	0.93	214.08	9.18	12.54	6.91	23.53	47.37	39.83	0.39	2.37	1.35	0	2.49	3.16	1.41	1.38	0	149.4	260.11	232.72	2.11	16	9.43	0	15.21	22.41	11	9.73	0
BnaA01g01240D	3.18	1.51	2.35	0.85	56.28	29.89	46.55	18.64	3.74	3.16	2.63	0.7	2.36	1.46	1.97	2.01	3.06	1.34	0.35	0.85	71	51.95	45.9	11.43	47.67	30.56	37.99	36.66	65	31.46	7.47	17
BnaA01g01250D	0.7	0.51	1.98	0.26	17	14.33	54.33	8	0.56	1.04	0.49	0.3	0.7	0.54	2.49	1.9	1.54	0.18	0.5	0.11	15	24	12	7	20	16	68	49	46	6	15	3
BnaA01g01260D	0	0	0	0	0	0	0	0	0	0	0	0	0	0	0	0	0	0	0	0	0	0	0	0	0	0	0	0	0	0	0	0
BnaA01g01270D	1.65	0.72	3.2	0.99	47.4	21.39	102.29	34.35	1.75	1.56	1.63	1.13	0.37	0.65	3.02	3.19	3.39	0.89	1.05	1.02	54.19	41.66	46.34	30	12	22.17	95	94.71	117.15	33.9	36.14	33
BnaA01g01280D	0	0.02	0	0	0	0.33	0	0	0	0	0	0.07	0	0	0	0	0	0	0	0	0	0	0	1	0	0	0	0	0	0	0	0
BnaA01g01290D	0	0	0	0	0	0	0	0	0	0	0	0	0	0	0	0	0	0	0	0	0	0	0	0	0	0	0	0	0	0	0	0
BnaA01g01300D	2	0.46	1.75	0.48	20.33	5.33	19	6	2.5	1.39	2.12	0.21	0.09	1.09	1.73	2.7	0.83	0.75	0.5	0.18	27	13	21	2	1	13	19	28	10	10	6	2
BnaA01g01310D	31.35	19.86	28.97	19.98	1053.16	731.82	1079.13	816.34	30.09	31.56	32.4	17.39	20.94	21.24	31.47	29.72	25.71	19.08	19.93	20.92	1090.17	988.88	1080.44	543.45	805	847	1160.34	1035.72	1041.33	852.51	802.59	793.93
BnaA01g01320D	0.5	0.29	0.13	0.84	12.74	8	3.67	25.68	0.6	0.6	0.31	0.21	0.52	0.13	0	0.27	0.13	0.84	0.67	1.02	16.29	14.14	7.78	5	15	4	0	7	4	28	20.28	28.75
BnaA01g01330D	10.52	30.79	9.43	30.74	600.96	1950.88	590.69	2128.15	9.68	8.42	13.47	20.49	37.47	34.4	7.57	12.81	7.9	27.35	35.75	29.13	594.43	447.08	761.38	1085.19	2441.98	2325.47	472.9	756.93	542.24	2070.4	2440.04	1874
BnaA01g01340D	3.16	0.95	2.14	1.09	215.64	70.97	161.96	90.17	2.94	3.26	3.29	0.91	1.06	0.89	2.24	2.28	1.9	0.95	1.17	1.15	216.35	207.74	222.83	58.01	82.67	72.24	167.93	161.7	156.26	85.98	96.01	88.53
BnaA01g01350D	0.19	0.02	0.06	0.03	2.67	0.33	1	0.67	0.06	0.36	0.14	0	0.06	0	0.06	0.06	0.06	0.1	0	0	1	5	2	0	1	0	1	1	1	2	0	0
BnaA01g01360D	6.16	9.56	7.28	8.39	158.27	274.96	208.52	262.97	6.01	6.51	5.96	5.8	10.37	12.5	6.95	7.33	7.56	8.25	8.92	7.99	166.64	156.04	152.14	138.69	304.89	381.3	196.04	195.32	234.21	282.08	274.74	232.09
BnaA01g01370D	0.93	1.16	0.95	0.61	10.33	14	11.67	8.54	0.58	0.86	1.35	1.34	0.78	1.35	0.73	1.46	0.67	0.87	0.37	0.6	7	9	15	14	10	18	9	17	9	13	5	7.62
BnaA01g01380D	0.2	0.1	0.4	0.11	2.33	1.33	5.33	1.67	0.08	0.26	0.25	0.09	0	0.21	0.3	0.71	0.2	0.18	0	0.14	1	3	3	1	0	3	4	9	3	3	0	2
BnaA01g01390D	0	0	0	0	0	0	0	0	0	0	0	0	0	0	0	0	0	0	0	0	0	0	0	0	0	0	0	0	0	0	0	0
BnaA01g01400D	18.79	20.58	28.48	16.75	534.64	638.41	892.33	573.32	20.46	19.15	16.76	19.62	16.38	25.73	28.73	32.63	24.07	12.48	20.33	17.43	625.69	506.58	471.64	517.54	531.55	866.13	894.04	959.87	823.08	470.49	691.06	558.42
BnaA01g01410D	5.24	26.71	6.69	27.19	192.06	1049.69	273	1215.23	5.05	5.38	5.28	32.07	24.29	23.77	6.06	7.16	6.84	25.51	31.04	25.01	199.86	184.25	192.07	1094.18	1019.72	1035.17	244.1	272.38	302.51	1244.51	1364.78	1036.41
BnaA01g01420D	12.19	7.29	9.06	6.48	329.67	210.33	274	213.99	13.44	12.92	10.2	8.88	6.63	6.36	10.17	6.97	10.03	7.33	5.41	6.7	391	325	273	222.72	204.61	203.67	301	195	326	262.98	175	204
BnaA01g01430D	0.49	0.2	0.9	0.22	25.67	11	52.33	13.67	0.44	0.55	0.48	0.23	0.1	0.26	0.83	1.08	0.79	0.19	0.29	0.17	25	27	25	11	6	16	48	59	50	13	18	10
BnaA01g01440D	0.42	0.31	0.33	0.13	6.81	5.4	6.04	2.4	0.08	0.28	0.91	0.34	0.44	0.15	0.22	0.29	0.47	0	0.12	0.26	1.45	4.31	14.67	5.16	8.22	2.83	3.89	4.88	9.34	0	2.38	4.82
BnaA01g01450D	2.47	2.28	2.21	2.83	133.33	134	133	186	2.75	2.75	1.91	2.25	2.03	2.56	2.03	2.15	2.45	2.6	3.48	2.41	160	138	102	113	125	164	120	120	159	186	225	147
BnaA01g01460D	2.6	2.67	2.65	2.78	180.32	200.67	204.29	235.33	2.32	2.88	2.6	2.95	2.52	2.54	2.54	3.06	2.36	2.41	3.56	2.36	173.95	187	180	191	201	210	194	220.96	197.92	223	297	186
BnaA01g01470D	28.74	20.57	23.42	17.57	450.12	355.23	405.81	336.58	29.25	25.99	30.98	15.14	24.9	21.66	25.58	23.27	21.41	20.74	14.68	17.3	492.29	378.27	479.79	219.79	444.71	401.19	438.03	376.67	402.73	430.23	274.59	304.91
BnaA01g01480D	1.41	1.68	2.16	0.45	54.33	68.67	93.48	21.07	1.81	1.81	0.6	2.21	1.32	1.51	1.78	2.06	2.65	0.36	0.61	0.39	75	65	23	79.01	58	69	75.17	82.32	122.96	18.19	28.01	17.01
BnaA01g01490D	0	0.38	0	0	0	3	0	0	0	0	0	0.56	0.57	0	0	0	0	0	0	0	0	0	0	4	5	0	0	0	0	0	0	0
BnaA01g01500D	3.31	2.5	1.88	0.7	60	47	37.62	15	3.39	3.26	3.29	4.1	0.73	2.66	3.08	1.28	1.28	0.42	0.32	1.37	66	55	59	69	15	57	61	24	27.85	10	7	28
BnaA01g01510D	0.99	0.09	0.06	0.02	22.25	2.33	1.33	0.67	1.26	0.43	1.28	0	0.28	0	0	0.09	0.08	0.07	0	0	30	8.74	28	0	7	0	0	2	2	2	0	0
BnaA01g01520D	1.28	0.96	1.82	0.97	237.8	195.86	375.51	219.78	1.04	1.53	1.28	0.91	1.02	0.95	1.42	2.41	1.64	0.92	1.15	0.83	209.87	265.76	237.78	158.56	217.29	211.74	290.22	467.38	368.93	227.58	257.47	174.3
BnaA01g01530D	0	0	0	0	0	0	0	0	0	0	0	0	0	0	0	0	0	0	0	0	0	0	0	0	0	0	0	0	0	0	0	0
BnaA01g01540D	0.63	0.76	0.94	1.59	19.67	26.33	32.67	60.65	0.53	0.82	0.55	0.58	0.86	0.83	1.22	0.77	0.82	1.58	1.57	1.61	18	24.02	17	17	31	31	42	25	31	66	58.96	57
BnaA01g01550D	2.43	22.36	5.3	37.72	31.97	312.43	78.33	595.81	3.69	2.21	1.4	24.47	15.85	26.76	6.36	1.64	7.91	44.07	27.93	41.17	51.38	26.62	17.92	293.55	233.98	409.77	90	22	123	755.79	431.82	599.81
BnaA01g01560D	5.64	10.68	5.67	19.52	83	169.67	91.33	345.33	6.42	4.41	6.08	10.61	10.3	11.14	6.93	5.75	4.32	18.76	16.01	23.78	101	60	88	144	172	193	111	87	76	364	280	392
BnaA01g01570D	0.97	84.39	1.55	179.68	21.5	1985.99	36.67	4772.76	0.93	0.47	1.52	100.55	62.64	89.97	1.29	2.55	0.8	154.88	200.09	184.06	22	9.5	33	2048.42	1570.1	2339.45	31	58	21	4510.58	5253.53	4554.18
BnaA01g01580D	1.49	0.34	1.38	0.63	21.7	5.33	22.33	11.33	1.47	1.55	1.46	0.44	0.18	0.41	1.25	1.53	1.37	0.98	0.29	0.61	23	21	21.1	6	3	7	20	23	24	19	5	10
BnaA01g01590D	5.51	6.55	5.75	9.91	38.77	51.14	45	85.42	5.8	6.39	4.33	4.58	8.74	6.34	6.47	5.61	5.18	10.49	9.95	9.3	44.07	42	30.24	30	70.42	53	50	41	44	98.27	84	74
BnaA01g01600D	4.54	2.96	3.4	3.62	73	51.31	60	69.89	4.53	3.29	5.81	3.03	2.25	3.59	3.14	4.05	3.02	2.96	4.03	3.88	78	49	91.99	44.92	41	68	55	67	58	62.72	77	69.96
BnaA01g01610D	0	0.09	0	0.06	0	1	0	0.67	0	0	0	0	0.28	0	0	0	0	0.08	0.09	0	0	0	0	0	3	0	0	0	0	1	1	0
BnaA01g01620D	1.32	1.09	0.82	1.31	22.33	20.67	16	28.33	0.87	1.31	1.77	0.82	1.17	1.28	0.37	0.73	1.36	2.28	0.83	0.83	16	21	30	13	23	26	7	13	27.99	52	17	16
BnaA01g01630D	3.1	0.88	2.64	1.64	90.84	28.6	85.53	57.28	2.72	2.06	4.53	0.54	1	1.1	2.8	2.65	2.47	0.87	2.23	1.83	85.52	56	131	14.5	33.31	38	89.62	80.16	86.8	33.71	77.79	60.35
BnaA01g01640D	1.91	1.29	1.41	1.24	23.67	17	19.67	18.67	1.19	1.55	2.99	1.89	0.98	1.01	1.53	1.24	1.46	0.78	1.67	1.28	16	18	37	22	14	15	21	16	22	13	25	18
BnaA01g01650D	3.72	2.8	3.08	1.71	123.81	102.78	114.83	70.3	3.21	4.19	3.76	2.34	3.49	2.56	3.46	2.71	3.06	1.94	1.67	1.53	115.87	130.85	124.7	72.86	133.66	101.83	127	94	123.49	86.3	66.88	57.71
BnaA01g01660D	2.51	1.21	1.55	0.64	76	40.67	50.7	22.67	3.04	1.97	2.53	0.65	1.35	1.64	2.17	1.55	0.92	0.23	0.75	0.95	98	55	75	18	46	58	71	48	33.11	9	27	32
BnaA01g01670D	24.44	143.34	26.44	127.08	333.24	2057.61	400.63	2098.65	28.79	25.94	18.6	197.68	106.55	125.79	22.73	27.06	29.53	114.66	153.61	112.97	421.18	328.15	250.39	2493.74	1653.86	2025.22	338.29	380.69	482.9	2067.77	2497.35	1730.83
BnaA01g01680D	5.51	2.97	8.57	5.15	147.09	87.07	252.07	164.98	6.33	5.22	4.98	2.29	3.54	3.09	7.62	9.87	8.21	4.33	5.31	5.8	180.98	129.25	131.05	56.54	107.34	97.34	221.91	271.69	262.61	152.58	168.69	173.67
BnaA01g01690D	3.54	9.02	3.65	17.64	66.25	181.35	75.12	397.02	3.43	2.94	4.26	10.01	7.71	9.33	4.12	3.99	2.85	12.32	24.46	16.15	68.93	51	78.81	173.42	164.4	206.23	84.18	77.07	64.1	305.24	546.08	339.75
BnaA01g01700D	23.99	10.06	18.3	7.75	1194.8	541.55	1009.92	468.52	23.13	24.7	24.15	10.87	10.24	9.08	14.67	22.51	17.72	6.13	10.65	6.46	1242.67	1147.65	1194.08	503.78	583.79	537.09	801.8	1163.57	1064.38	405.89	636.19	363.49
BnaA01g01710D	0	0	0	0	0	0	0	0	0	0	0	0	0	0	0	0	0	0	0	0	0	0	0	0	0	0	0	0	0	0	0	0
BnaA01g01720D	0	0	0	0	0	0	0	0	0	0	0	0	0	0	0	0	0	0	0	0	0	0	0	0	0	0	0	0	0	0	0	0
BnaA01g01730D	0	0	0	0	0	0	0	0	0	0	0	0	0	0	0	0	0	0	0	0	0	0	0	0	0	0	0	0	0	0	0	0
BnaA01g01740D	0	0	0	0.02	0	0	0	0.33	0	0	0	0	0	0	0	0	0	0	0	0.06	0	0	0	0	0	0	0	0	0	0	0	1
BnaA01g01750D	0.35	1.14	0.41	0.72	45.47	159.78	59.48	112.49	0.45	0.34	0.25	1.13	1.14	1.15	0.4	0.44	0.4	0.7	0.76	0.69	63.18	41.42	31.82	135.28	168.14	175.91	57	59.19	62.24	120.53	117	99.94
BnaA01g01760D	0.75	0.15	0.39	0.05	12.45	2.67	7.33	1	0.61	0.98	0.66	0.13	0.31	0	0.33	0.29	0.54	0.09	0.05	0	11	15.35	11	2	6	0	6	5	11	2	1	0
BnaA01g01770D	0	0	0.39	0	0	0	1.33	0	0	0	0	0	0	0	0.61	0	0.55	0	0	0	0	0	0	0	0	0	2	0	2	0	0	0
BnaA01g01780D	11.71	6.18	1.94	3.4	145.13	81	26.53	50.33	12.06	5.51	17.57	7.65	3.86	7.02	2.26	1.58	1.98	2.03	5.93	2.24	159.11	62.92	213.36	87	54	102	30.39	20	29.19	33	87	31
BnaA01g01790D	8.64	5.88	12.5	5.57	208.2	154.67	335.26	163.33	9.11	9.26	7.54	5.4	6.79	5.46	11.27	13.18	13.06	5.59	5.03	6.1	236.49	208	180.1	121	187	156	297.79	329	379	179	145	166
BnaA01g01800D	29.49	11.97	27.26	13.11	477.19	210.32	490.22	257.31	31.36	25.96	31.15	11.05	13.52	11.34	21.58	29.01	31.19	11.62	17.34	10.37	544.31	389.72	497.53	165.36	249.01	216.58	381.09	484.34	605.22	248.78	334.62	188.53
BnaA01g01810D	5.29	6.5	2.75	4.15	123.82	164.2	71.86	117.82	5.44	4.96	5.46	7.29	3.57	8.63	2.58	2.52	3.15	3.92	4.05	4.49	136.92	108	126.54	158.26	95.28	239.06	66	61	88.57	121.76	113.2	118.51
BnaA01g01820D	0	0	0	0	0	0	0	0	0	0	0	0	0	0	0	0	0	0	0	0	0	0	0	0	0	0	0	0	0	0	0	0
BnaA01g01830D	0	0	0	0	0	0	0	0	0	0	0	0	0	0	0	0	0	0	0	0	0	0	0	0	0	0	0	0	0	0	0	0
BnaA01g01840D	0.26	1.12	0.1	1.02	3	13.88	1.33	14.67	0.24	0.37	0.17	1.38	0.68	1.29	0	0	0.29	1.49	0.65	0.92	3	4	2	14.9	9	17.75	0	0	4	23	9	12
BnaA01g01850D	0	0	0	0	0	0	0	0	0	0	0	0	0	0	0	0	0	0	0	0	0	0	0	0	0	0	0	0	0	0	0	0
BnaA01g01860D	0	0	0	0	0	0	0	0	0	0	0	0	0	0	0	0	0	0	0	0	0	0	0	0	0	0	0	0	0	0	0	0
BnaA01g01870D	9.74	7.24	3.95	12.69	199.16	159.39	90.4	313.77	11.17	9.48	8.58	7.21	9.13	5.37	2.36	4.04	5.44	11.97	13.44	12.65	244.79	179.6	173.08	136.28	212.42	129.47	52.59	85.22	133.38	323.5	327.47	290.35
BnaA01g01880D	0.35	0.1	0.24	0.42	6	2	4.67	8.67	0.27	0.38	0.41	0.06	0	0.25	0.21	0.23	0.29	0.35	0.34	0.57	5	6	7	1	0	5	4	4	6	8	7	11
BnaA01g01890D	0	0.2	0	0.17	0	0.67	0	0.67	0	0	0	0	0.3	0.29	0	0	0	0.52	0	0	0	0	0	0	1	1	0	0	0	2	0	0
BnaA01g01900D	43.14	35.37	37.76	35.64	491.52	436.71	479.52	497.53	42.56	45.35	41.52	36.23	39.12	30.75	30.39	41.79	41.1	40.18	31.48	35.26	523	482	469.55	384	510.12	416	380	494	564.55	608.73	430	453.86
BnaA01g01910D	3.04	3.14	1.27	1.13	45	50.76	21	20.67	2.43	3.1	3.59	2.82	4.89	1.7	0.98	1.49	1.34	1.42	0.84	1.13	39	43	53	39	83.29	30	16	23	24	28	15	19
BnaA01g01920D	1.06	1.6	1.34	1.34	24	40.33	34.67	37.72	0.81	1.26	1.1	1.22	2.36	1.21	1.07	1.3	1.66	1.44	1.39	1.2	20	27	25	26	62	33	27	31	46	44	38.17	31
BnaA01g01930D	0.41	0.67	0.47	0.79	6.67	12	8.33	15.67	0.57	0.4	0.25	0.46	1.08	0.47	0.73	0.36	0.31	0.93	0.56	0.87	10	6	4	7	20	9	13	6	6	20	11	16
BnaA01g01940D	0.26	0.12	0.31	0.02	3.33	1.67	4.33	0.33	0.53	0.09	0.17	0.09	0.07	0.21	0.3	0.08	0.55	0	0	0.07	7	1	2	1	1	3	4	1	8	0	0	1
BnaA01g01950D	1.37	1.12	1.8	0.83	30.46	26.61	44.14	22.53	1.14	1.49	1.49	1.43	0.91	1.02	1.76	2.13	1.5	0.74	0.96	0.8	27.37	31	33	29.57	23.26	27	43.04	49.27	40.11	22	25.58	20
BnaA01g01960D	1.59	1.19	3.34	0.96	16.96	13.67	39.11	12.33	2.04	0.72	2.02	1.13	0.84	1.61	2.7	3.26	4.05	1.3	0.64	0.93	23	7	20.89	11	10	20	31	35.34	51	18	8	11
BnaA01g01970D	6.5	5.36	3.69	3.1	213.3	194.19	135.11	125.79	5.67	5.69	8.13	4.02	7.06	4.99	3.55	3.66	3.85	4.07	2.37	2.86	200.8	174.26	264.85	122.88	265.3	194.38	128.06	124.81	152.45	177.78	93.49	106.1
BnaA01g01980D	35.13	39.5	49.45	47.24	929.5	1136.3	1454.94	1519.52	35.45	40.05	29.9	40.53	37.04	40.93	50.95	51.01	46.4	43.28	48.12	50.32	1012.79	989.51	786.19	998.57	1123	1287.33	1481.03	1401.79	1482.01	1524.56	1528	1506
BnaA01g01990D	1.34	3.78	2.46	4.23	52.38	165.57	108.08	203.81	1.08	1.79	1.15	2.93	3.57	4.83	2.85	2.45	2.09	3.91	4.69	4.09	46	66	45.13	108	161.89	226.82	123.85	100.79	99.6	205.74	222.66	183.04
BnaA01g02000D	0.02	0.04	0.05	0.13	0.33	0.67	0.86	2.67	0	0.07	0	0	0.11	0	0	0.06	0.08	0.28	0	0.11	0	1	0	0	2	0	0	1	1.57	6	0	2
BnaA01g02010D	0	0	0	0	0	0	0	0	0	0	0	0	0	0	0	0	0	0	0	0	0	0	0	0	0	0	0	0	0	0	0	0
BnaA01g02020D	0.3	0.02	1.27	0.47	4.35	0.33	20.95	8.33	0.19	0.45	0.26	0	0	0.06	0.92	1.44	1.46	0.36	0.34	0.72	3.07	6.14	3.83	0	0	1	14.85	22	26	7	6	12
BnaA01g02030D	0	0	0	0.12	0	0	0	2.17	0	0	0	0	0	0	0	0	0	0.1	0.18	0.09	0	0	0	0	0	0	0	0	0	2	3.03	1.47
BnaA01g02040D	0.52	1.06	0.22	1.57	42.14	90.45	19.44	153.68	0.68	0.59	0.29	1.44	0.9	0.85	0.16	0.35	0.16	1.67	1.55	1.48	59.13	43.98	23.32	107.28	82.99	81.07	13.85	29.12	15.35	178.05	149.18	133.82
BnaA01g02050D	19.75	11.34	18.32	10.66	425.83	258.71	438.36	281.77	19.67	20.71	18.88	15.61	9.06	9.36	17.79	19.68	17.48	11.83	10.21	9.95	457.21	416.44	403.84	313	223.54	239.6	420.83	440	454.24	339.19	263.87	242.24
BnaA01g02060D	4.66	4.99	5.73	4.37	90.44	104.76	120	100.87	6.06	2.02	5.91	4.38	2.25	8.34	5.44	6.92	4.82	3.39	6.3	3.43	124.15	35.82	111.34	77.28	48.87	188.13	113.33	136.42	110.24	85.5	143.52	73.6
BnaA01g02070D	1.08	0.21	2.04	0.39	18	4	37.33	7.8	1.1	1.47	0.66	0.06	0.36	0.2	2.39	2.58	1.14	0.22	0.5	0.44	20	22.99	11	1	7	4	44	45	23	5	10	8.4
BnaA01g02080D	3.34	11.61	7.43	27.3	22.67	86	55.25	222.88	3.58	2.39	4.04	10.68	8.17	15.99	12.27	5.72	4.31	24.53	25.12	32.26	26	15	27	67	63	128	90.74	40	35	219.91	203.01	245.71
BnaA01g02090D	148.75	126.06	119.95	148.01	4849.73	4413.98	4331.95	5875.63	156.92	147.23	142.1	145.76	96.33	136.08	102.9	136.03	120.91	152.78	146.24	145.01	5501.17	4463.87	4584.16	4407	3583.62	5251.31	3670.45	4587.27	4738.14	6603.48	5698.37	5325.04
BnaA01g02100D	29.58	43.07	37.86	43.4	1315.57	2102.78	1873.7	2363.79	29.4	31.3	28.03	36.87	49.8	42.55	36.94	39.15	37.5	48.2	38.93	43.07	1410.66	1298.62	1237.44	1525.71	2535.45	2247.18	1803.22	1806.72	2011.16	2850.98	2075.77	2164.63
BnaA01g02110D	3.89	1.06	6.23	1.45	50.99	15.42	90.64	23.14	3.31	4.07	4.29	0.76	1.33	1.09	5.68	7.32	5.68	1.38	1.32	1.65	47	49.96	56	9.26	20	17	82	99.91	90	24.14	20.79	24.49
BnaA01g02120D	4.11	0.87	7.17	1.34	112.32	26.96	220.06	44.76	3.09	5.32	3.92	0.54	1.06	1.01	8.68	6.91	5.93	1.03	1.49	1.5	92.17	137.23	107.55	14	33.66	33.22	263.72	198.42	198.03	38	49.29	47
BnaA01g02130D	0.73	1.33	0.85	0.55	18	36.26	22.85	16.18	0.94	0.83	0.41	0.96	1.53	1.5	0.84	1.06	0.64	0.55	0.31	0.78	25	19	10	22	43	43.79	22.67	26.87	19	18	9	21.55
BnaA01g02140D	0	0	0	0	0	0	0	0	0	0	0	0	0	0	0	0	0	0	0	0	0	0	0	0	0	0	0	0	0	0	0	0
BnaA01g02150D	4.54	0.8	5.77	0.55	216.69	41	305.12	32.68	4.71	4.97	3.94	1.02	0.73	0.66	5.59	6.37	5.34	0.68	0.52	0.46	242.34	221.11	186.61	45.48	40	37.52	292.66	315.26	307.43	43.05	30	25
BnaA01g02160D	10.94	16.64	11.53	17.47	263.26	432.72	307.42	516.21	10.41	11.51	10.89	18.24	17.22	14.47	9.87	14.06	10.66	19.16	17.47	15.79	270.52	258.85	260.42	409.01	475.07	414.07	261	351.6	309.67	613.98	504.68	429.98
BnaA01g02170D	5.27	4.8	6.41	3.86	115.69	113.35	155.79	103.7	5.23	5.18	5.41	5.34	4.75	4.31	6.18	6.94	6.1	4.28	3.7	3.61	123.51	105.87	117.69	108.85	119.16	112.05	148.56	157.63	161.18	124.52	97.27	89.32
BnaA01g02180D	4.67	3.25	4.49	3.35	187.56	144.71	200.45	162.89	4.74	4.78	4.49	2.31	4.27	3.18	4.19	4.76	4.53	2.73	4.09	3.22	205	179	178.67	86.38	196	151.74	184.36	198	219	145.73	196.98	145.95
BnaA01g02190D	13.53	20.46	13.22	15.53	396.04	659.18	433.68	554.64	14.25	15.69	10.66	16.13	27.73	17.52	13.35	11.52	14.79	16.04	14.37	16.18	449.83	428.41	309.87	439.29	929.3	608.95	429.03	349.96	522.04	624.48	504.25	535.19
BnaA01g02200D	0	0	0	0	0	0	0	0	0	0	0	0	0	0	0	0	0	0	0	0	0	0	0	0	0	0	0	0	0	0	0	0
BnaA01g02210D	1.26	1.83	2.58	3.92	24.33	38.4	55.33	90.67	1.45	1.18	1.16	1.64	2.19	1.67	1.67	2.92	3.16	3.26	4.05	4.44	30	21	22	29.19	48	38	35	58	73	83	93	96
BnaA01g02220D	9.67	2.94	13.55	3.74	155.33	52.33	242.5	71.33	10.52	8.27	10.23	2.02	2.68	4.12	14.2	11.11	15.34	2.03	4.92	4.27	181	123	162	30	49	78	248.56	183.93	295	43	94	77
BnaA01g02230D	0	0	0	0.01	0	0	0	0.33	0	0	0	0	0	0	0	0	0	0.02	0	0	0	0	0	0	0	0	0	0	0	1	0	0
BnaA01g02240D	7.97	8.56	9	3.87	108.98	124.39	137.07	64.72	7.03	7.05	9.82	11.45	5.58	8.64	5.29	11.2	10.5	4.16	3.77	3.67	103.66	89.95	133.32	145.6	87.28	140.28	79.36	158.85	173.01	75.65	61.75	56.75
BnaA01g02250D	0	0.83	0	0.3	0	10.32	0	4.19	0	0	0	0.93	0.9	0.65	0	0	0	0.19	0.47	0.23	0	0	0	10	11.95	9	0	0	0	3	6.56	3
BnaA01g02260D	9.52	3.83	8.11	3.11	163.05	71.24	154.73	65	8.71	9.28	10.56	3.95	3.42	4.12	9.44	7.36	7.54	3.25	3.02	3.05	161.05	148.41	179.69	62.96	67	83.77	177.48	130.82	155.89	74	62	59
BnaA01g02270D	31.6	7.55	45.59	6.98	827.58	215.28	1317.96	220.37	33.6	29.08	32.13	7.11	6.33	9.2	47.69	47.77	41.32	6.19	6.88	7.86	944.62	707.05	831.07	172.26	188.84	284.74	1363.92	1291.59	1298.38	214.57	215.09	231.46
BnaA01g02280D	0.01	0	0.02	0.02	0.33	0	0.67	0.67	0.03	0	0	0	0	0	0	0.06	0	0	0	0.06	1	0	0	0	0	0	0	2	0	0	0	2
BnaA01g02290D	3	4.87	3.15	3.15	100.27	179.07	116.99	127.4	3.53	3.39	2.07	3.75	5.85	5	3.78	2.66	3	2.99	2.73	3.74	126.86	105.42	68.52	116.38	222.99	197.85	138.14	92.13	120.7	132.31	109.15	140.74
BnaA01g02300D	6.98	13.15	5.94	4.33	449.85	943.21	427.77	344.21	7.02	7.69	6.23	8.04	20.92	10.5	4.64	6.51	6.68	5.31	4.1	3.58	488.32	462.44	398.79	482.16	1543.65	803.82	328.53	435.72	519.06	455.25	316.52	260.85
BnaA01g02310D	0	0	0	0	0	0	0	0	0	0	0	0	0	0	0	0	0	0	0	0	0	0	0	0	0	0	0	0	0	0	0	0
BnaA01g02320D	0	0	0	0	0	0	0	0	0	0	0	0	0	0	0	0	0	0	0	0	0	0	0	0	0	0	0	0	0	0	0	0
BnaA01g02330D	1.43	2.41	2.54	2.59	19.33	35.33	38	43	1.73	1.28	1.28	2.16	3.26	1.82	2.51	2.44	2.66	3.36	2.24	2.18	25	16	17	27	50	29	37	34	43	60	36	33
BnaA01g02340D	26.06	20.41	11.05	10.92	275.58	231.61	129.26	141.99	25.49	26.62	26.08	24.53	15.29	21.41	9.2	13.6	10.35	13.28	9.1	10.38	290.59	262.49	273.65	241.22	184.93	268.68	106.69	149.15	131.94	186.71	115.29	123.96
BnaA01g02350D	0.59	1.12	0.73	0.33	17.67	34.67	25.16	12	0.66	0.43	0.68	1.67	0.86	0.83	0.29	0.39	1.51	0.51	0.2	0.27	21	12	20	46	29	29	9.49	12	54	20	7	9
BnaA01g02360D	0	0	0	0	0	0	0	0	0	0	0	0	0	0	0	0	0	0	0	0	0	0	0	0	0	0	0	0	0	0	0	0
BnaA01g02370D	10.71	2.98	10.19	3.54	619.37	187.87	655.59	246.71	9.82	10.53	11.79	3.04	2.2	3.7	10.32	10.42	9.84	2.51	4.47	3.63	612.84	568.31	676.97	163.68	145.96	253.97	655.01	625.31	686.45	193.26	309.77	237.1
BnaA01g02380D	0	0	0	0	0	0	0	0	0	0	0	0	0	0	0	0	0	0	0	0	0	0	0	0	0	0	0	0	0	0	0	0
BnaA01g02390D	0.29	0	0.13	0	1.33	0	0.67	0	0.63	0.24	0	0	0	0	0	0	0.38	0	0	0	3	1	0	0	0	0	0	0	2	0	0	0
BnaA01g02400D	0	0	0	0	0	0	0	0	0	0	0	0	0	0	0	0	0	0	0	0	0	0	0	0	0	0	0	0	0	0	0	0
BnaA01g02410D	0.54	0	0.21	0	5.33	0	2.33	0	0.47	0.22	0.92	0	0	0	0.09	0.29	0.25	0	0	0	5	2	9	0	0	0	1	3	3	0	0	0
BnaA01g02420D	0.85	0.12	0.81	0.23	8.33	1.35	8.67	2.67	0.77	0.33	1.46	0	0	0.35	1.22	0.6	0.6	0	0.6	0.09	8	3	14	0	0	4.06	13	6	7	0	7	1
BnaA01g02430D	0.61	0.41	0.41	1.01	7.67	5	5.33	14.67	1.31	0.36	0.17	0.72	0.44	0.07	0.61	0.48	0.14	0.5	1.95	0.59	17	4	2	8	6	1	8	6	2	8	28	8
BnaA01g02440D	5.49	16.35	8.87	23.65	245.05	787.69	437.07	1279.53	5.37	5.73	5.38	18.43	12.33	18.29	9.65	9.73	7.22	19.94	27.32	23.7	258.55	238.43	238.16	764.66	629.63	968.79	472.18	450.48	388.55	1182.94	1461.24	1194.42
BnaA01g02450D	0.17	0.08	0.56	0.2	5.33	3	21.33	8	0.03	0.35	0.12	0.03	0.03	0.18	0	0.72	0.97	0.13	0.15	0.32	1	11	4	1	1	7	0	25	39	6	6	12
BnaA01g02460D	7.86	0.2	0.94	0.4	242.71	6.33	32.77	15	6.56	5.53	11.49	0.31	0.09	0.19	0.57	0.91	1.35	0.12	0.95	0.14	217.92	158.8	351.4	9	3	7	19.31	29	50	5	35	5
BnaA01g02470D	12.63	5.96	16.93	7.59	126.33	67.33	188.55	93.53	12.83	16.43	8.62	3.21	7.56	7.12	16.56	18.7	15.52	8.98	5.81	7.98	139	154	86	30	87	85	182.65	195	188	119.99	70	90.61
BnaA01g02480D	1.7	1.88	2.75	1.39	28	33.86	50.33	27.85	2.11	2.05	0.93	1.77	1.46	2.41	2.72	2.87	2.67	1.37	1.4	1.4	37.47	31.43	15.11	27	27.44	47.13	49	49	53	30.04	27.52	26
BnaA01g02490D	24.57	26.75	18.34	20.66	403.23	484.53	334.49	408.19	24.84	21.72	27.16	19.53	31.59	29.14	17.45	18.1	19.46	17.07	21.46	23.45	437.93	331.2	440.57	297	591	565.6	313	307	383.46	371	420.57	433
BnaA01g02500D	4.65	3.73	4.13	3.44	111.22	95.54	108.47	100.23	4.53	4.38	5.05	4.54	2.94	3.72	4.32	4.95	3.12	3.22	3.89	3.22	116.67	97.5	119.49	100.86	80.34	105.41	113.12	122.63	89.66	102.33	111.41	86.94
BnaA01g02510D	0.17	18.01	0.1	49.82	3.33	390.67	2.33	1244.74	0.09	0.16	0.25	24.57	10.86	18.59	0.04	0.09	0.16	51.23	53.59	44.63	2	3	5	467	254	451	1	2	4	1391.73	1312.47	1030.03
BnaA01g02520D	1.06	0.87	0.55	0.85	28.67	25	16.33	27.67	1.18	0.6	1.4	0.97	0.49	1.14	0.58	0.58	0.5	0.96	0.72	0.86	34	15	37	24	15	36	17	16	16	34	23	26
BnaA01g02530D	0.94	2.31	3	4.51	15.33	41.33	54.67	90	0.85	0.86	1.11	2.05	2.09	2.79	4.03	2.07	2.9	5.17	3.53	4.84	15	13	18	31	39	54	72	35	57	112	69	89
BnaA01g02540D	34.76	6.56	20.65	14.52	383.85	78.95	253.18	194.79	33.72	33.23	37.32	6.46	5.63	7.6	19.64	21.98	20.32	12.17	19.44	11.94	401.12	341.86	408.58	66.25	71.03	99.57	237.7	251.57	270.27	178.56	257	148.82
BnaA01g02550D	0	0	0	0	0	0	0	0	0	0	0	0	0	0	0	0	0	0	0	0	0	0	0	0	0	0	0	0	0	0	0	0
BnaA01g02560D	0	0	0	0	0	0	0	0	0	0	0	0	0	0	0	0	0	0	0	0	0	0	0	0	0	0	0	0	0	0	0	0
BnaA01g02570D	14.24	4.46	9.22	3.12	104	35.33	75.56	28	11.47	16.32	14.92	4.82	5.46	3.09	11.02	7.95	8.68	3.17	3.29	2.89	91	112	109	33	46	27	89	60.67	77	31	29	24
BnaA01g02580D	0.01	0	0.01	0	0.67	0	0.67	0	0	0	0.04	0	0	0	0.04	0	0	0	0	0	0	0	2	0	0	0	2	0	0	0	0	0
BnaA01g02590D	1.39	0.75	2.32	1.15	46.29	28.15	83.93	46.15	1.75	1.39	1.03	0.36	0.61	1.29	2.16	2.94	1.85	1.06	1.11	1.29	62.21	42.86	33.79	11.07	23	50.37	78	100.43	73.35	46.45	44	48
BnaA01g02600D	7.62	1.79	16.55	0.78	103.32	27	250.22	13	7.22	9.13	6.52	1.26	2.76	1.36	16.74	17.12	15.78	1.11	0.31	0.91	106	115.95	88	16	43	22	250.02	241.68	258.95	20	5	14
BnaA01g02610D	4.03	0.38	1.79	0.37	66	7	32.73	7	3.79	3.8	4.49	0.26	0.27	0.62	1.9	1.71	1.77	0.05	0.56	0.49	67	58	73	4	5	12	34.18	29	35	1	11	9
BnaA01g02620D	11.46	1.04	9.08	1.33	248.63	24.39	221.51	35.67	11.41	11.77	11.2	1.04	1.05	1.02	9.21	7.08	10.95	1.84	1.12	1.02	266.91	237.97	241	21	26	26.16	219.2	159.16	286.18	53	29	25
BnaA01g02630D	2.49	0.79	2.21	0.38	62.04	21.7	60.55	11.33	2.89	1.65	2.92	0.53	0.6	1.23	2.84	1.92	1.88	0.18	0.64	0.32	76.83	37.95	71.33	12.11	17	36	76.85	49	55.8	6	19	9
BnaA01g02640D	21	7.56	16.41	5.87	591.61	229.62	512.83	201.22	20.92	22.41	19.68	8.73	5.52	8.44	14.03	19.14	16.06	5.69	5.8	6.12	635.66	588.86	550.3	228.76	177.98	282.13	433.79	559.44	545.27	213.23	195.73	194.71
BnaA01g02650D	36.88	2.09	19.61	4.2	1048.07	64.9	616.46	143.83	39.58	32.69	38.36	1.9	1.95	2.43	15.7	22.51	20.61	3.2	5.73	3.67	1206.42	861.73	1076.06	49.87	63.16	81.66	487.08	659.99	702.31	120.26	194.16	117.08
BnaA01g02660D	20.84	18.98	14.83	22.22	538.86	528.82	422.68	695.28	23.57	18.63	20.33	18.72	23.11	15.11	11.07	18.1	15.32	21.65	23.62	21.39	652.61	445.95	518.02	446.92	679	460.55	311.88	482	474.17	738.84	726.83	620.16
BnaA01g02670D	16.88	15.89	20.06	14.22	814.76	833.45	1068.83	834.97	18.5	16.58	15.57	14.92	16.63	16.11	19.29	22.07	18.81	14.86	14.15	13.64	958.74	743.09	742.45	666.84	914.59	918.91	1016.94	1100.09	1089.45	949.61	814.91	740.38
BnaA01g02680D	0.01	0	0	0	0.33	0	0	0	0	0.03	0	0	0	0	0	0	0	0	0	0	0	1	0	0	0	0	0	0	0	0	0	0
BnaA01g02690D	1.98	1.93	3.26	2.44	97.5	104.32	177.52	145.7	2.11	1.76	2.07	1.45	2.53	1.81	2.19	3.97	3.61	2.39	2.66	2.27	111.66	80.4	100.44	65.89	141.83	105.24	117.54	201.85	213.16	155.52	155.92	125.66
BnaA01g02700D	0.04	0	0.16	0	0.67	0	3	0	0	0.07	0.06	0	0	0	0.22	0.06	0.2	0	0	0	0	1	1	0	0	0	4	1	4	0	0	0
BnaA01g02710D	0.86	0.28	0.8	0.36	17.33	6	17.67	9	1.02	1.07	0.5	0.38	0.26	0.21	0.82	0.96	0.62	0.53	0.33	0.22	22	20	10	7	6	5	18	20	15	14	8	5
BnaA01g02720D	59.52	1.17	23.27	10.02	736.62	15	326.67	146.56	48.71	74.18	55.68	2.07	0.98	0.47	0.29	33.58	35.94	1.57	13.63	14.87	656	863.87	690	24	14	7	4	435	541	26	203.98	209.71
BnaA01g02730D	0	0	0	0	0	0	0	0	0	0	0	0	0	0	0	0	0	0	0	0	0	0	0	0	0	0	0	0	0	0	0	0
BnaA01g02740D	15.52	8.63	9.69	7.67	488.72	298.61	343.27	297.19	14.98	18.95	12.63	7.68	9.75	8.45	6.6	10.5	11.97	8.01	8.48	6.53	510.82	558.98	396.35	226.01	352.7	317.13	229.1	344.28	456.44	336.9	321.54	233.14
BnaA01g02750D	0	0	0	0	0	0	0	0	0	0	0	0	0	0	0	0	0	0	0	0	0	0	0	0	0	0	0	0	0	0	0	0
BnaA01g02760D	0.02	0.01	0	0	0.33	0.33	0	0	0	0.05	0	0	0	0.04	0	0	0	0	0	0	0	1	0	0	0	1	0	0	0	0	0	0
BnaA01g02770D	7.66	7.87	7.83	6.98	268.75	306.69	306.57	298.42	7.01	7.6	8.36	5.47	10.34	7.8	7.02	8.26	8.21	6.73	6.86	7.36	265.68	249	291.56	178.75	415.82	325.5	270.82	301.12	347.77	314.43	288.9	291.94
BnaA01g02780D	9.55	20.25	11.55	20.97	256.33	579.33	342.67	680.44	10.53	8.44	9.67	24.14	18.14	18.47	12.81	10.98	10.85	20.55	19.46	22.89	303	210	256	599	554	585	375	304	349	729	622.33	690
BnaA01g02790D	2.23	1.68	2.03	1.61	36.67	30	37.67	32.47	2.02	2.66	2.01	1.82	1.53	1.68	1.99	1.75	2.36	1.78	1.23	1.82	36	41	33	28	29	33	36	30	47	39	24.4	34
BnaA01g02800D	2.28	2.46	2.64	1.98	135.19	161.35	175.75	146.02	1.95	2.95	1.93	2.15	3.23	1.99	2.77	2.67	2.48	2.17	2.08	1.7	125.88	165	114.69	120.08	222	141.97	182	166.03	179.23	173.17	149.47	115.41
BnaA01g02810D	32.46	15.48	24.04	13.38	383	201.67	313.33	191.67	32.45	30.87	34.06	12.05	15.73	18.67	27.4	24.72	20.01	13.22	12.04	14.89	412	339	398	132	212	261	354	302	284	207	170	198
BnaA01g02820D	3.65	4.22	3.17	2.84	139.64	176.89	135.31	133.33	3.27	4.25	3.43	3.86	5.56	3.24	3.25	3.31	2.96	2.98	2.77	2.77	135.56	152.54	130.82	138.07	244.62	147.97	137	132	136.94	152.1	127.54	120.35
BnaA01g02830D	7.06	4.94	3.81	3.37	105.67	79.44	63.19	60.8	6.34	6.59	8.26	5.89	4.16	4.78	4.47	3.73	3.22	2.61	3.37	4.14	102.31	92.02	122.67	82	71.31	85	73.36	58	58.2	52	60.39	70
BnaA01g02840D	2.4	4.29	6.76	5.38	36.01	70.8	111.8	96.33	3.31	1.56	2.34	2.29	5.94	4.65	5.83	6.03	8.42	5.12	5.73	5.3	52.51	21.46	34.07	31.26	99.9	81.24	94.11	92.04	149.26	100	101	88
BnaA01g02850D	0.69	0.55	1.05	0.74	16.07	14.33	27.03	21	0.81	0.6	0.65	0.37	0.6	0.69	1.45	0.83	0.86	0.84	0.61	0.76	20.22	13	15	8	16	19	37	20	24.1	26	17	20
BnaA01g02860D	7.09	3.86	5.45	7.26	319.1	190.31	271.02	390.61	7.47	6.45	7.36	3.51	2.08	5.99	4.24	6.47	5.64	3.72	11.93	6.13	360.58	269.51	327.2	145.96	106.77	318.2	208.45	300.39	304.22	221.6	640.19	310.03
BnaA01g02870D	0.32	0.04	0.8	0.04	7	1	19.71	1	0.13	0.29	0.55	0.05	0	0.08	0.95	0.74	0.72	0	0	0.12	3	6	12	1	0	2	23	17	19.12	0	0	3
BnaA01g02880D	8.83	29.99	9.74	68.21	256.54	926.76	313.5	2406.48	9.37	9.58	7.54	39.46	19.41	31.11	7.07	12.13	10.02	62.85	74.12	67.67	293.13	259.32	217.17	1064.76	644.27	1071.26	225	365	350.49	2424.27	2577.48	2217.68
BnaA01g02890D	0	0.11	0	0.14	0	2	0	3	0	0	0	0.13	0.1	0.1	0	0	0	0.18	0.25	0	0	0	0	2	2	2	0	0	0	4	5	0
BnaA01g02900D	5.02	6.74	3.38	2.53	79.59	115.49	58.82	48.83	5.39	4.03	5.64	6.36	8.09	5.78	3	4.08	3.07	2.75	2.52	2.33	91.45	59.2	88.12	93	145.63	107.85	51.74	66.51	58.22	57.49	47.59	41.4
BnaA01g02910D	1.54	0.54	1.47	0.64	59.63	23.55	61.61	29.51	1.71	0.91	2	0.25	0.32	1.06	2.14	1.53	0.75	0.47	1.09	0.35	70.48	32.43	75.98	8.83	13.98	47.83	89.79	60.58	34.46	23.71	49.78	15.04
BnaA01g02920D	2.63	1.14	2.75	0.77	67.15	32.33	78.98	23.79	2.77	3.22	1.89	0.92	1.13	1.38	2.31	2.64	3.31	0.68	0.85	0.77	76.59	76.86	48	22	33	42	64.8	70	102.15	23	26	22.38
BnaA01g02930D	1.04	1	1.06	0.45	30	32.75	33.44	15.1	1.24	0.57	1.32	0.23	0.75	2.02	0.97	1.15	1.06	0.24	0.39	0.72	38	15	37	6	24.26	68	30.14	33.81	36.38	9	13.12	23.18
BnaA01g02940D	262.13	193.52	321.07	192.18	2828.28	2259.36	3848.88	2528.28	254.96	271.7	259.72	211.05	162.8	206.7	319.04	337.95	306.21	193.65	184.02	198.88	2967.72	2735.2	2781.92	2118.7	2011	2648.37	3778.41	3783.98	3984.26	2779.14	2380.86	2424.84
BnaA01g02950D	24.82	15.68	20.28	13.51	708.18	482.18	640.64	471.12	25.09	24.19	25.19	16.62	17.79	12.63	18.84	22.52	19.47	15.27	11.69	13.57	770.35	642.35	711.84	439.99	579.61	426.93	588.61	665.04	668.26	577.9	398.92	436.53
BnaA01g02960D	0	0	0	0	0	0	0	0	0	0	0	0	0	0	0	0	0	0	0	0	0	0	0	0	0	0	0	0	0	0	0	0
BnaA01g02970D	0.46	0.11	0.39	0.27	8.33	2	7.3	6	0.57	0.06	0.74	0.12	0.2	0	0.26	0.81	0.09	0.38	0.28	0.15	11	1	13	2	4	0	5	14.91	2	8.99	6	3
BnaA01g02980D	20.07	9.04	12.33	9.57	350	162.42	237.21	202.16	21.84	21.86	16.5	15.35	5.77	5.99	5.29	18.69	13.01	8.18	11.34	9.19	410	355	285	248.52	115	123.74	101	337.49	273.13	189.28	236.57	180.63
BnaA01g02990D	2.85	0.96	2.43	0.73	69.06	25.43	65.33	22	2.64	2.83	3.07	0.89	1.09	0.9	2.59	2.7	2.01	0.9	0.79	0.51	69.09	64.08	74.01	20	30.29	26	69	68	59	29	23	14
BnaA01g03000D	0	0	0	0	0	0	0	0	0	0	0	0	0	0	0	0	0	0	0	0	0	0	0	0	0	0	0	0	0	0	0	0
BnaA01g03010D	69.81	46.36	34.52	51.04	1850.1	1338.03	1023.83	1650.76	68.31	81.16	59.97	45.54	54.38	39.15	17.7	43.68	42.19	48.88	52.45	51.79	1957.51	2011.37	1581.42	1125.38	1653.71	1235	516.01	1204.09	1351.38	1727.05	1670.56	1554.68
BnaA01g03020D	0.03	20.56	0.28	5.76	0.67	534.7	7.11	163.54	0	0	0.09	8.23	40.48	12.97	0.04	0.56	0.25	7.21	3.82	6.24	0	0	2.01	177.04	1071.07	355.98	1	13.5	6.83	221.67	106	162.94
BnaA01g03030D	0.04	0.01	0.01	0	1	0.33	0.33	0	0	0.09	0.04	0	0.04	0	0	0.04	0	0	0	0	0	2	1	0	1	0	0	1	0	0	0	0
BnaA01g03040D	59.28	47.66	84.66	47.51	752	663.33	1200	740	55.38	66.48	55.99	43.35	51.37	48.26	88.96	81.06	83.97	51.3	46.62	44.6	760	789	707	513	748	729	1242	1070	1288	868	711	641
BnaA01g03050D	33.75	15.37	24.34	12.07	1232.22	600.87	997.54	537.76	32.4	36.19	32.66	18.97	12.86	14.28	27.99	18.68	26.36	12.49	10.71	13	1277.51	1234.13	1185.01	645.08	537.92	619.6	1122.78	708.3	1161.55	606.97	469.47	536.84
BnaA01g03060D	18.37	24.76	17.03	38.53	1077.06	1561.37	1102	2752.43	18.08	17.62	19.42	28.43	20.07	25.79	15.05	20.59	15.44	37.74	43.17	34.67	1141.4	962.06	1127.71	1547.78	1344.31	1792.02	966.56	1250.05	1089.39	2937.11	3028.34	2291.85
BnaA01g03070D	2.08	0.73	2.26	0.43	110.36	42.08	134.8	28.67	1.56	2.7	1.99	0.81	0.67	0.71	2.33	2.27	2.19	0.55	0.48	0.26	90.32	134.76	106	40.23	41	45	137.04	126.03	141.33	39	31	16
BnaA01g03080D	0.68	2.8	3.67	10.36	5.67	25.67	34.33	105.67	0.55	0.76	0.72	2.81	2.59	3	2.92	4.35	3.74	9.02	10.6	11.46	5	6	6	22	25	30	27	38	38	101	107	109
BnaA01g03090D	0.05	0.15	0.09	0.23	1.67	5	3.33	8.67	0.06	0.1	0	0.2	0.08	0.16	0.09	0.03	0.16	0.19	0.24	0.25	2	3	0	6	3	6	3	1	6	8	9	9
BnaA01g03100D	1.71	0.75	0.95	0.41	11.67	5.33	7	3.33	1.51	0.63	2.98	1.11	0.26	0.87	1.35	1.14	0.37	0.22	0.62	0.39	11	4	20	7	2	7	10	8	3	2	5	3
BnaA01g03110D	1.44	1.74	0.77	0.88	25.33	31.97	15.01	18.84	1.16	1.34	1.83	2.8	1.07	1.35	0.86	0.87	0.58	1.01	0.38	1.24	22	22	32	46	21.68	28.22	16.74	15.91	12.38	23.72	8	24.79
BnaA01g03120D	2.21	0.23	2.36	0.44	49.87	5.62	59.39	12.11	1.74	2.17	2.71	0.19	0.12	0.37	2.78	2.46	1.85	0.35	0.62	0.35	42.6	46	61	4	3	9.86	69.37	58.04	50.77	10.44	16.9	9
BnaA01g03130D	4.7	1.82	3.02	4.46	62.88	26	45.33	72.84	4.05	5.11	4.95	2.32	1.5	1.63	2.37	3.37	3.33	4.45	3.72	5.2	58.63	64	66	29	23	26	35	47	54	79.55	59.98	79
BnaA01g03140D	1.15	0.04	0.74	0.14	7.33	0.33	5.33	1	1.17	0.85	1.44	0	0	0.13	0.43	0.61	1.18	0	0.13	0.28	8	5	9	0	0	1	3	4	9	0	1	2
BnaA01g03150D	15.6	6.07	11.33	6.85	114.33	47.67	92.33	60.9	14.17	14.19	18.43	7.19	6.2	4.83	14.3	9.6	10.08	7.36	3.76	9.42	112	97	134	49	52	42	115	73	89	71.7	33	78
BnaA01g03160D	0	0	0	0	0	0	0	0	0	0	0	0	0	0	0	0	0	0	0	0	0	0	0	0	0	0	0	0	0	0	0	0
BnaA01g03170D	0.04	0.03	0.15	0	0.67	0.67	3.33	0	0	0	0.11	0	0	0.09	0.19	0	0.26	0	0	0	0	0	2	0	0	2	4	0	6	0	0	0
BnaA01g03180D	0.12	0.05	0.19	0.06	2.33	1	3.67	1.33	0.25	0.06	0.06	0.06	0.1	0	0	0.58	0	0.04	0.14	0	5	1	1	1	2	0	0	11	0	1	3	0
BnaA01g03190D	0	0	0	0	0	0	0	0	0	0	0	0	0	0	0	0	0	0	0	0	0	0	0	0	0	0	0	0	0	0	0	0
BnaA01g03200D	153.25	24.23	154.46	11.97	4211.69	744.2	4663.37	388.71	153.84	134.35	171.57	16.28	13.05	43.36	167.73	175.4	120.26	3.93	17.9	14.08	4542.3	3430.89	4661.88	414.48	408.88	1409.24	5038.94	4981.79	3969.39	143.11	587.62	435.39
BnaA01g03210D	1.63	0.75	3.18	0.75	18	8.67	38.62	10	1.59	2.13	1.18	1.07	0.87	0.3	3.52	4	2.02	0.68	0.6	0.96	19	22	13	11	11	4	42.86	46	27	10	8	12
BnaA01g03220D	0.47	0.85	0.38	0.8	6.62	13.16	6.23	13.76	0.35	0.29	0.76	0.66	1.37	0.51	0.41	0.07	0.66	0.77	0.45	1.19	5.33	3.86	10.68	8.68	22.14	8.65	6.4	1.09	11.21	14.58	7.64	19.07
BnaA01g03230D	4.26	2.42	3.38	1.98	152.23	95.25	134.28	86.63	3.59	4.19	5.01	2.04	2.7	2.52	3.14	3.92	3.09	2.19	1.68	2.06	138.72	139.91	178.05	67.96	110.54	107.26	123.54	145.66	133.65	104.16	72.37	83.36
BnaA01g03240D	7	0.96	4.06	0.83	270	38.67	176.33	39.2	6.29	8.3	6.42	1.55	0.61	0.72	4.37	3.38	4.43	0.81	0.77	0.91	263	300	247	56	27	33	186	136	207	41.59	36	40
BnaA01g03250D	0	0	0	0	0	0	0	0	0	0	0	0	0	0	0	0	0	0	0	0	0	0	0	0	0	0	0	0	0	0	0	0
BnaA01g03260D	0.04	0	0	0	0.33	0	0	0	0	0.13	0	0	0	0	0	0	0	0	0	0	0	1	0	0	0	0	0	0	0	0	0	0
BnaA01g03270D	11.26	15.11	10.56	5.94	287.48	421.64	299.27	186.07	11.44	10.85	11.5	12.87	19.61	12.86	10.38	10.75	10.54	7.14	5.57	5.1	314.13	257.61	290.7	304.73	571.34	388.86	290.14	284.06	323.62	241.66	169.92	146.64
BnaA01g03280D	1.83	2.04	0.6	0.96	27	31.67	10	17.67	1.43	2.02	2.03	3.32	0.7	2.09	0.8	0.45	0.56	1.11	0.95	0.83	23	28	30	46	12	37	13	7	10	22	17	14
BnaA01g03290D	0	0	0.06	0	0	0	1.33	0	0	0	0	0	0	0	0.04	0.09	0.04	0	0	0	0	0	0	0	0	0	1	2	1	0	0	0
BnaA01g03300D	1.18	4.2	1.64	0.52	7.33	29.33	11.67	4	0.74	1.2	1.61	2.74	5.02	4.84	0.87	1.54	2.51	0.6	0.53	0.42	5	7	10	16	36	36	6	10	19	5	4	3
BnaA01g03310D	2.48	0.15	1.37	0.03	20	1.39	12.19	0.33	2.18	2.39	2.87	0.13	0	0.33	2.29	1.1	0.73	0	0.1	0	19	18	23	1	0	3.16	20.3	9.18	7.09	0	1	0
BnaA01g03320D	8.48	6.43	5.87	5.32	405.03	335.6	311.51	311.01	8.13	8.59	8.71	5.91	6.99	6.38	5.2	6.57	5.83	5.54	5.63	4.78	419.13	383.05	412.92	262.67	382.4	361.73	272.86	325.98	335.7	352.38	322.52	258.12
BnaA01g03330D	23.19	13.38	22.98	9.25	190.1	121.33	209.33	92.67	22.9	19.52	27.14	8.95	17.98	13.2	15.62	26.8	26.51	9.58	11.34	6.83	201.72	148.64	219.94	68	168	128	140	227	261	104	111	63
BnaA01g03340D	4.82	2.57	5.3	3.2	56.76	34	70.33	46.33	4.09	5.92	4.46	1.54	4.05	2.13	4.84	4.96	6.09	3.62	2.32	3.66	52.32	65.5	52.47	17	55	30	63	61	87	57	33	49
BnaA01g03350D	2.02	0.6	1.22	0.27	80	26	54.33	13	1.7	2.19	2.18	0.62	0.66	0.53	1.19	1.16	1.32	0.25	0.17	0.4	73	81	86	23	30	25	52	48	63	13	8	18
BnaA01g03360D	1.68	2.02	1.41	1.17	32.33	43.33	30.33	27.67	1.64	1.51	1.89	1.23	2.32	2.5	1.23	1.4	1.6	1.33	1.21	0.97	34	27	36	22	51	57	26	28	37	34	28	21
BnaA01g03370D	7.16	3.91	7.23	2.59	186.83	112.55	209.83	82.54	7.84	7.63	6.01	2.7	5.93	3.09	5.4	8.22	8.07	2.93	2.07	2.78	220.11	185.15	155.22	65.46	176.82	95.36	154.14	222.12	253.23	101.49	64.48	81.64
BnaA01g03380D	4.04	5.29	5.87	5.64	172.77	246.3	278.87	294.97	3.83	3.86	4.42	5.25	4.81	5.8	4.88	6.83	5.91	5.76	6.25	4.91	176.64	154.11	187.56	208.81	235.57	294.52	229	302.85	304.75	327.25	320.44	237.23
BnaA01g03390D	2.22	2.26	1.8	2.59	108.88	120.56	97.89	155.12	2.25	2.7	1.71	2.3	2.34	2.15	1.67	2.07	1.66	2.47	2.7	2.61	119.32	123.79	83.54	105	131.2	125.48	89.97	105.54	98.16	161.38	159.1	144.88
BnaA01g03400D	24.68	22.45	27.73	19.91	693.2	690.52	863.1	679.31	25.35	23.75	24.94	19.61	22.41	25.32	29.45	27.67	26.06	19.31	20.74	19.67	765.79	620.52	693.29	511	718.57	842	905.21	804	880.1	719.16	696.25	622.51
BnaA01g03410D	2.36	1.16	2.13	1.09	101.73	53.98	101.34	57.31	2.82	2.28	1.99	1.23	0.91	1.35	2.27	2.01	2.11	1.31	1.3	0.65	129.89	90.83	84.46	49	44.31	68.62	106.4	88.87	108.76	74.25	66.5	31.17
BnaA01g03420D	1.97	0.79	1.36	0.57	45.33	20.33	34.38	16	2.24	1.6	2.08	0.42	0.69	1.26	1.52	1.35	1.21	0.59	0.55	0.58	55	34	46.99	9	18	34	38	32	33.14	18	15	15
BnaA01g03430D	14.36	4.7	15.47	3.93	366.6	131.51	438.89	121.68	15.9	12.83	14.34	3.95	4.03	6.12	14.84	14.5	17.06	3.66	4.84	3.29	435.08	303.63	361.1	93.21	117	184.33	413.21	381.67	521.8	123.62	147.17	94.26
BnaA01g03440D	19.07	8.6	16.76	9.91	231.09	116.08	224.16	146.21	16.92	16.19	24.1	5.33	11.26	9.2	15.48	20.23	14.57	9.87	9.83	10.02	220.89	182.87	289.52	60	156	132.23	205.69	254.08	212.72	158.92	142.72	137
BnaA01g03450D	2.67	0.9	1.15	0.67	29.33	10.54	14.39	8.72	2.41	2.87	2.72	1.3	0.56	0.85	1.49	0.61	1.36	0.29	0.48	1.25	28.7	29.52	29.77	13.38	7.12	11.13	18.06	7.03	18.09	4.26	6.34	15.56
BnaA01g03460D	7.16	1.98	10.42	2.24	167.67	51	270.67	64	7.58	7.25	6.64	1.75	1.5	2.7	9.83	11.14	10.3	2.06	2.89	1.78	191	158	154	38	40	75	252	270	290	64	81	47
BnaA01g03470D	8.84	31.01	0.17	17.32	75	285.33	1.67	181	3.96	11.15	11.41	40.12	29.27	23.65	0.21	0	0.29	12.42	22.36	17.18	37	90	98	323	290	243	2	0	3	143	232	168
BnaA01g03480D	5.34	6.76	8.75	6.75	91.01	128.66	165.67	140.82	5.27	5.72	5.02	4.29	8.4	7.6	6.17	10.94	9.14	7.31	6.02	6.93	97	91.03	85	68	164	153.97	115.45	193.67	187.9	165.78	123.21	133.46
BnaA01g03490D	0	0	0	0	0	0	0	0	0	0	0	0	0	0	0	0	0	0	0	0	0	0	0	0	0	0	0	0	0	0	0	0
BnaA01g03500D	1.64	0.55	0.96	0.27	39.33	14.67	25.33	8	1.64	0.95	2.34	0.32	0.88	0.46	0.77	1.14	0.98	0.54	0.04	0.22	42	21	55	7	24	13	20	28	28	17	1	6
BnaA01g03510D	14.42	8.86	7.96	10.26	562.33	371.39	344.91	484.58	14.9	14.82	13.53	10.25	7.17	9.15	6.91	8.66	8.3	9.14	10.77	10.86	625.8	538.41	522.79	371.45	319.69	423.03	295.24	349.74	389.76	473.53	502.6	477.61
BnaA01g03520D	0.09	0.08	0.08	0.02	1.67	1.67	1.67	0.33	0.05	0	0.21	0.11	0	0.13	0.24	0	0	0	0	0.05	1	0	4	2	0	3	5	0	0	0	0	1
BnaA01g03530D	0.8	1.43	1.3	1.2	16.67	33	30.24	30.33	0.84	1.03	0.53	1.23	0.96	2.1	1.79	0.88	1.22	1.01	1.4	1.19	19	20	11	24	23	52	41	19	30.71	28	35	27.99
BnaA01g03540D	0.18	0.48	0.33	0.23	5.48	16.33	11	8.24	0.1	0.06	0.39	0.14	0.64	0.65	0.06	0.64	0.3	0.23	0.27	0.18	3.1	1.67	11.67	4	22	23	2	20	11	9	9.72	6
BnaA01g03550D	2.24	0.53	2.42	0.47	126.67	32.67	151.33	32	2.31	1.98	2.44	0.52	0.56	0.52	2.38	2.56	2.33	0.4	0.59	0.41	140	104	136	27	36	35	147	149.03	157.97	30	40	26
BnaA01g03560D	1.34	1.54	4.69	2.53	19.33	24.67	74	44	1.41	1.49	1.12	0.97	2.18	1.46	5.18	6.02	2.88	2.19	2.2	3.19	22	20	16	13	36	25	82	90	50	42	38	52
BnaA01g03570D	0.19	0.25	0.1	0.07	6.44	9	3.67	3	0.11	0.13	0.34	0.26	0.03	0.45	0	0.14	0.15	0.09	0.1	0.03	4	4	11.33	8	1	18	0	5	6	4	4	1
BnaA01g03580D	8.91	1.95	4.75	0.22	373.49	90.56	220.01	11.15	11.55	8.04	7.13	0.88	3.65	1.31	2.49	5.94	5.83	0.13	0.35	0.19	516.41	310.93	293.12	34	173.21	64.46	113.37	255.24	291.42	7.08	17.3	9.07
BnaA01g03590D	0.51	0.15	0.48	0.08	13.71	4.67	14.67	2.67	0.41	0.63	0.48	0.04	0.16	0.25	0.37	0.39	0.67	0	0.15	0.1	12	16	13.12	1	5	8	11	11	22	0	5	3
BnaA01g03600D	18.54	12.97	13.36	11.55	275.24	209.6	220.13	207.39	19.68	17.05	18.88	11.86	14.07	12.98	11.78	14.07	14.24	11.31	9.86	13.49	313.73	235	277	163	238	227.81	191	215.71	253.69	222.3	174.67	225.2
BnaA01g03610D	4.95	9.53	5.87	7.4	441.67	935.42	580.75	806.07	4.6	5.83	4.43	8.19	11.46	8.95	6.05	6.5	5.05	6.81	8.2	7.2	444	487	394	681.58	1173.68	951	594.13	603.52	544.61	810.2	880	728
BnaA01g03620D	0.24	0	0.06	0	6.04	0	1.67	0	0.26	0.09	0.37	0	0	0	0.04	0.04	0.1	0	0	0	7	2	9.11	0	0	0	1	1	3	0	0	0
BnaA01g03630D	7.59	3.67	6.06	2.26	397.33	210.33	354.79	145.06	6.78	8.82	7.16	3.58	3.27	4.15	7	5.5	5.67	2.25	2.46	2.06	385	433	374	175.23	196.64	259.11	404.33	300.38	359.67	157.58	154.91	122.7
BnaA01g03640D	5.13	3.57	5.43	2.77	416.71	319.84	492.47	275.97	4.63	5.48	5.28	2.99	4.06	3.67	5.7	5.26	5.33	2.84	2.91	2.56	406.54	416.82	426.76	226.27	378.26	354.99	509.61	444.33	523.48	308.01	284.42	235.48
BnaA01g03650D	6.33	8.05	7.54	4.62	120	168.33	159.67	106.67	5.97	6	7.02	5.9	11.3	6.94	7.99	6.62	8.01	4.68	4.23	4.95	122	106	132	104	245	156	166	130	183	118	96	106
BnaA01g03660D	0.28	0.25	0.22	0.3	13.29	12.67	11.67	17.33	0.28	0.25	0.32	0.23	0.26	0.25	0.21	0.25	0.21	0.32	0.3	0.28	14	11	14.88	10	14	14	11	12	12	20	17	15
BnaA01g03670D	0.93	0.23	0.96	0.18	18.91	5	21	4.67	1.01	0.68	1.09	0.21	0.22	0.25	0.59	1.67	0.62	0.41	0.04	0.09	21.96	12.84	21.93	4	5	6	13	35	15	11	1	2
BnaA01g03680D	9.63	15.93	7.22	3.18	504.26	945.39	426.48	205.67	9.73	9.73	9.42	4.11	33.78	9.89	4.7	6.86	10.11	4.11	2.6	2.84	548.94	474.68	489.15	199.89	2022.28	614	270.02	372.1	637.31	286	163	168
BnaA01g03690D	0	0	0	0	0	0	0	0	0	0	0	0	0	0	0	0	0	0	0	0	0	0	0	0	0	0	0	0	0	0	0	0
BnaA01g03700D	0	0	0	0	0	0	0	0	0	0	0	0	0	0	0	0	0	0	0	0	0	0	0	0	0	0	0	0	0	0	0	0
BnaA01g03710D	0	0	0	0	0	0	0	0	0	0	0	0	0	0	0	0	0	0	0	0	0	0	0	0	0	0	0	0	0	0	0	0
BnaA01g03720D	0	0	0	0	0	0	0	0	0	0	0	0	0	0	0	0	0	0	0	0	0	0	0	0	0	0	0	0	0	0	0	0
BnaA01g03730D	3.68	2.67	7.15	1.74	67.33	54.5	147.64	39.29	2.71	4.35	3.98	2.03	3.33	2.64	5.96	7.5	7.98	1.78	1.53	1.91	54	75	73	35	70.49	58	121	143.91	178	43.9	34	39.96
BnaA01g03740D	0.82	0.44	0.7	0.35	13.51	7.67	13	7.33	0.76	0.78	0.92	0.52	0.64	0.15	0.99	0.47	0.65	0.64	0.3	0.11	13.53	12	15	8	12	3	18	8	13	14	6	2
BnaA01g03750D	0	0	0	0	0	0	0	0	0	0	0	0	0	0	0	0	0	0	0	0	0	0	0	0	0	0	0	0	0	0	0	0
BnaA01g03760D	0	0	0	0.02	0	0	0	0.33	0	0	0	0	0	0	0	0	0	0	0.05	0	0	0	0	0	0	0	0	0	0	0	1	0
BnaA01g03770D	0	0	0	0	0	0	0	0	0	0	0	0	0	0	0	0	0	0	0	0	0	0	0	0	0	0	0	0	0	0	0	0
BnaA01g03780D	0.73	0.16	0.61	0.06	10.38	2.33	10	1	0.58	1.11	0.5	0.3	0.06	0.12	0.5	0.4	0.92	0.05	0.06	0.06	9	15	7.14	4	1	2	8	6	16	1	1	1
BnaA01g03790D	14.04	8.87	16.77	8.03	635.1	435.35	844.01	442.43	14.83	14.44	12.86	8.73	9.17	8.7	14.35	17.78	18.19	7.7	9.42	6.98	721.72	607.69	575.9	366.17	473.68	466.21	710.39	832.02	989.62	461.91	509.62	355.75
BnaA01g03800D	14.04	13.64	17.05	12.99	410.41	425.88	554.76	462.17	15.82	15.03	11.26	16.35	12.25	12.32	12.69	18.76	19.69	13.27	13.12	12.58	497.21	408.4	325.62	442.99	408.4	426.24	405.82	566.88	691.57	514.15	458.29	414.06
BnaA01g03810D	10.78	8.33	8.94	6.56	263.14	220.72	243.56	195.96	10.97	11.8	9.56	8.52	8.38	8.09	9.36	8.2	9.25	7.47	5.14	7.06	288.79	268.87	231.77	193.49	234.08	234.6	250.68	207.71	272.29	242.61	150.43	194.85
BnaA01g03820D	8.48	0.78	0.77	0.24	171.54	18	17.09	6	8.69	9.5	7.25	0.21	1.3	0.83	0.77	0.87	0.66	0.33	0.12	0.26	189.63	179.4	145.59	4	30	20	17	18.26	16	9	3	6
BnaA01g03830D	37.36	17.16	54	12.5	258.74	129.67	413	105.34	39.29	31.11	41.68	14.99	18.01	18.49	63.92	49.89	48.18	14.19	10	13.32	291.71	199.75	284.75	96.01	141.91	151.1	482.86	356.3	399.83	129.92	82.5	103.59
BnaA01g03840D	3.74	4.05	3.82	2.24	100.31	121.32	115.82	73.38	2.47	3.65	5.1	3.14	3.49	5.52	4.23	2.99	4.24	1.68	3.11	1.93	72	92	136.93	79	107.96	177	125.57	83.87	138.01	60.3	100.86	58.99
BnaA01g03850D	0.43	0	0.04	0.01	8.67	0	1	0.33	0.42	0.11	0.76	0	0	0	0.05	0	0.08	0	0.04	0	9	2	15	0	0	0	1	0	2	0	1	0
BnaA01g03860D	267.99	125.77	342.53	127.91	15148.2	7697.84	21473.9	8803.56	209.11	304.99	289.86	148.99	100.31	128.01	406.13	381.24	240.23	99.97	146.28	137.47	12848.6	16206.8	16389.3	7895.24	6540.53	8657.74	25389.6	22532.7	16499.3	7573.45	9989.96	8847.26
BnaA01g03870D	0.03	0	0	0	0.67	0	0	0	0.1	0	0	0	0	0	0	0	0	0	0	0	2	0	0	0	0	0	0	0	0	0	0	0
BnaA01g03880D	6.33	2.77	5.01	1.56	112.33	53	99	33	7.49	5.55	5.96	3.06	1.19	4.07	4.92	4.17	5.94	1.33	1.38	1.96	142	91	104	50	24	85	95	76	126	31	29	39
BnaA01g03890D	0.67	0.16	1	0.18	15	4	24.61	4.86	0.63	0.53	0.86	0.15	0.04	0.3	0.74	1.3	0.97	0.14	0.23	0.18	15	11	19	3	1	8	18	29.84	26	4	6	4.59
BnaA01g03900D	0	0	0.01	0	0	0	0.09	0	0	0	0	0	0	0	0	0	0.04	0	0	0	0	0	0	0	0	0	0	0	0.26	0	0	0
BnaA01g03910D	0.23	0.37	0.2	0.04	1.32	2.33	1.33	0.33	0	0.7	0	0.53	0.29	0.28	0.15	0.16	0.28	0.12	0	0	0	3.96	0	3	2	2	1	1	2	1	0	0
BnaA01g03920D	0	0	0	0	0	0	0	0	0	0	0	0	0	0	0	0	0	0	0	0	0	0	0	0	0	0	0	0	0	0	0	0
BnaA01g03930D	0	0	0	0	0	0	0	0	0	0	0	0	0	0	0	0	0	0	0	0	0	0	0	0	0	0	0	0	0	0	0	0
BnaA01g03940D	0.05	0	0	0	0.67	0	0	0	0.07	0	0.07	0	0	0	0	0	0	0	0	0	1	0	1	0	0	0	0	0	0	0	0	0
BnaA01g03950D	0	0	0.04	0.07	0	0	0.39	0.8	0	0	0	0	0	0	0	0.11	0	0	0	0.2	0	0	0	0	0	0	0	1.16	0	0	0	2.41
BnaA01g03960D	0.04	0.14	0.17	0.08	1.01	4	4.58	2.33	0.04	0.05	0.04	0	0.22	0.21	0.08	0.2	0.24	0.06	0.07	0.11	1	1.04	1	0	6	6	2	5	6.74	2	2	3
BnaA01g03970D	0	0	0	0	0	0	0	0	0	0	0	0	0	0	0	0	0	0	0	0	0	0	0	0	0	0	0	0	0	0	0	0
BnaA01g03980D	0	0.08	0.04	0	0	0.67	0.33	0	0	0	0	0	0.24	0	0	0.13	0	0	0	0	0	0	0	0	2	0	0	1	0	0	0	0
BnaA01g03990D	0	0	0	0	0	0	0	0	0	0	0	0	0	0	0	0	0	0	0	0	0	0	0	0	0	0	0	0	0	0	0	0
BnaA01g04000D	444.77	72.34	381.37	25.52	12709.8	2277.94	12152.9	885.13	447.44	392.31	494.55	52.89	93.72	70.4	337.38	369.57	437.15	26.36	21.75	28.46	13738.3	10417.7	13973.5	1400.69	3053.67	2379.45	10539.9	10915.2	15003.7	997.95	742.14	915.29
BnaA01g04010D	9.32	5.82	10.34	3.33	95.33	64.73	117.67	41.33	9.98	10.49	7.49	5.76	5.53	6.16	9.63	10.84	10.55	3.24	2.86	3.9	110	100	76	54.75	64.73	74.72	108	115	130	44	35	45
BnaA01g04020D	1.15	1.56	0.48	2.04	84.55	126.99	39.22	181.81	0.85	1.04	1.57	1.22	1.97	1.5	0.45	0.48	0.51	1.72	2.5	1.89	67.36	71.58	114.71	83.8	166.17	131	36.03	36.43	45.2	168.27	220.36	156.79
BnaA01g04030D	8.62	2.85	8.17	1.42	318.93	116.21	336.19	64.33	8.93	8.82	8.11	2.17	3.73	2.66	8	8.11	8.39	1.36	1.9	1.01	355.62	303.76	297.41	74.7	157.52	116.42	324.23	310.8	373.55	66.79	84	42.21
BnaA01g04040D	2.6	1.25	2.34	2.62	36.01	18.24	35.51	44.15	2.57	1.87	3.37	1.74	0.51	1.5	3.07	2.11	1.83	3.13	2.02	2.71	38.02	24	46	22.24	8	24.48	46.26	30	30.27	57.11	33.34	42
BnaA01g04050D	0.42	0.47	0.48	0.5	6.33	7.67	7.8	8.97	0.37	0.36	0.54	0.36	0.47	0.57	0.31	0.67	0.45	0.3	0.95	0.24	6	5	8	5	8	10	5	10.39	8	5.91	17	4
BnaA01g04060D	0	0	0	0	0	0	0	0	0	0	0	0	0	0	0	0	0	0	0	0	0	0	0	0	0	0	0	0	0	0	0	0
BnaA01g04070D	0.22	0.07	0.46	0	1.67	0.67	4	0	0	0.14	0.52	0	0.11	0.11	0	0.74	0.64	0	0	0	0	1	4	0	1	1	0	6	6	0	0	0
BnaA01g04080D	0.26	0.25	0.76	0.2	2.33	2.67	7.67	2.33	0	0.23	0.55	0	0.38	0.37	0.59	1.05	0.63	0.41	0	0.19	0	2	5	0	4	4	6	10	7	5	0	2
BnaA01g04090D	0	0	0	0	0	0	0	0	0	0	0	0	0	0	0	0	0	0	0	0	0	0	0	0	0	0	0	0	0	0	0	0
BnaA01g04100D	10.31	4.47	9.46	4.98	486.98	226.09	494.87	286.86	10.33	9.87	10.73	5.31	4.23	3.88	9.54	10.02	8.82	5.1	5.06	4.79	525.16	433.81	501.97	232.9	228.17	217.2	493.27	490.1	501.25	319.74	285.59	255.24
BnaA01g04110D	1.02	0.42	0.38	0.75	27.67	12.39	11.52	24.67	0.74	0.75	1.58	0.48	0.17	0.62	0.67	0.25	0.23	0.75	0.65	0.85	21.68	19	42.34	12	5.16	20	20	7	7.56	27	21	26
BnaA01g04120D	0.19	0.05	0.11	0.12	3	1	2	2.33	0.24	0.07	0.26	0	0	0.16	0.17	0	0.16	0.19	0.16	0	4	1	4	0	0	3	3	0	3	4	3	0
BnaA01g04130D	3.74	1.3	4.16	1.09	343.26	131.93	426.7	121.61	3.62	3.97	3.62	1.05	1.48	1.37	3.7	4.24	4.54	0.94	1.24	1.09	359.15	340.35	330.29	89.89	156.08	149.82	372.8	404.7	502.6	114.3	137.06	113.46
BnaA01g04140D	0.01	0.05	0	0	0.33	1.68	0	0	0	0.04	0	0	0.13	0.03	0	0	0	0	0	0	0	1	0	0	4.04	1	0	0	0	0	0	0
BnaA01g04150D	2.64	2.1	1.21	6.93	36	31	18.67	115	2.52	2.21	3.18	2.37	1.03	2.91	0.47	1.27	1.89	6.69	7.66	6.44	37	28	43	30	16	47	7	18	31	121	125	99
BnaA01g04160D	1.06	0.35	1.1	0.2	25.05	9	28.33	5.5	1.16	0.46	1.57	0.32	0.11	0.62	1.45	0.95	0.89	0.1	0.41	0.08	29	10	36.16	7	3	17	37	23	25	3	11.51	2
BnaA01g04170D	0	0	0	0	0	0	0	0	0	0	0	0	0	0	0	0	0	0	0	0	0	0	0	0	0	0	0	0	0	0	0	0
BnaA01g04180D	0	0	0	0	0	0	0	0	0	0	0	0	0	0	0	0	0	0	0	0	0	0	0	0	0	0	0	0	0	0	0	0
BnaA01g04190D	0	0	0	0	0	0	0	0	0	0	0	0	0	0	0	0	0	0	0	0	0	0	0	0	0	0	0	0	0	0	0	0
BnaA01g04200D	10.21	9.79	8.68	9.93	384.82	403.52	364.93	456.88	10.36	10.25	10.01	8.47	12.11	8.78	7.76	8.71	9.57	10.3	10.15	9.34	420.47	360	373.98	296.51	521.83	392.23	320.48	340	434.32	515.42	457.86	397.35
BnaA01g04210D	0	0	0.11	0.03	0	0	1	0.33	0	0	0	0	0	0	0	0.12	0.2	0	0.1	0	0	0	0	0	0	0	0	1	2	0	1	0
BnaA01g04220D	0.1	0.04	0.16	0.02	4.13	2	7.82	1	0.04	0.15	0.1	0	0.1	0.02	0.15	0.24	0.1	0	0.02	0.04	2.04	6	4.36	0	5	1.01	7.34	11	5.13	0	1	2
BnaA01g04230D	0	0	0	0	0	0	0	0	0	0	0	0	0	0	0	0	0	0	0	0	0	0	0	0	0	0	0	0	0	0	0	0
BnaA01g04240D	0	0	0	0	0	0	0	0	0	0	0	0	0	0	0	0	0	0	0	0	0	0	0	0	0	0	0	0	0	0	0	0
BnaA01g04250D	0	0	0	0	0	0	0	0	0	0	0	0	0	0	0	0	0	0	0	0	0	0	0	0	0	0	0	0	0	0	0	0
BnaA01g04260D	0	0	0	0	0	0	0	0	0	0	0	0	0	0	0	0	0	0	0	0	0	0	0	0	0	0	0	0	0	0	0	0
BnaA01g04270D	0.08	0.21	0.3	0.1	1.47	5	6.99	2.33	0.05	0.13	0.05	0	0.51	0.12	0.28	0.28	0.35	0	0.12	0.17	1	2.4	1	0	12	3	6.31	6	8.66	0	3	4
BnaA01g04280D	0.1	0.05	0.09	0.13	1	0.67	1	1.67	0.09	0.2	0	0	0	0.16	0.09	0.18	0	0.21	0	0.17	1	2	0	0	0	2	1	2	0	3	0	2
BnaA01g04290D	0.46	0.13	0.48	0.2	43.62	13.51	50.58	23.04	0.42	0.49	0.46	0.11	0.2	0.07	0.45	0.52	0.46	0.18	0.27	0.14	43.4	43.94	43.51	10.14	22.38	8	47.07	51.52	53.14	22.77	31.36	15
BnaA01g04300D	2.85	1.12	2.3	1.97	39.67	17.33	36	33	3.06	3.38	2.1	0.93	0.69	1.75	2.29	2	2.62	1.4	2.21	2.29	46	44	29	12	11	29	35	29	44	26	37	36
BnaA01g04310D	3.49	0.94	3.62	3.36	49	14.33	57	57.67	3.31	3.29	3.88	1	0.62	1.2	3.57	3.02	4.26	3.43	4.05	2.59	50	43	54	13	10	20	55	44	72	64	68	41
BnaA01g04320D	0	0	0	0	0	0	0	0	0	0	0	0	0	0	0	0	0	0	0	0	0	0	0	0	0	0	0	0	0	0	0	0
BnaA01g04330D	0	0.01	0.1	0.01	0	0.33	5.33	0.67	0	0	0	0	0	0.02	0.04	0.1	0.16	0.02	0.02	0	0	0	0	0	0	1	2	5	9	1	1	0
BnaA01g04340D	6.15	2.97	6.15	2.36	145.97	74.57	161.25	68.4	6.76	6.57	5.12	3.84	2.9	2.16	6.42	6.6	5.43	2.49	2.49	2.09	172.54	145.09	120.27	84.52	78.46	60.73	166.83	162	154.92	78.42	70.77	56
BnaA01g04350D	0.05	0	0.22	0.01	1.67	0	7.65	0.33	0.09	0.07	0	0	0	0	0.09	0.22	0.35	0	0	0.03	3	2	0	0	0	0	3	6.95	13	0	0	1
BnaA01g04360D	9.26	7.85	9.02	8.09	539.57	499.93	581.24	577.15	8.1	10.63	9.05	7.82	7.53	8.19	7.95	11.8	7.3	7.1	10.45	6.72	511.73	580.96	526.01	425.85	504.56	569.38	510.84	717.18	515.69	553.29	733.63	444.54
BnaA01g04370D	0	0	0	0	0	0	0	0	0	0	0	0	0	0	0	0	0	0	0	0	0	0	0	0	0	0	0	0	0	0	0	0
BnaA01g04380D	4.82	4.43	5.2	4.16	164.23	165.05	195.77	173.12	4.74	4.68	5.04	4	5.09	4.21	5.48	5.63	4.48	3.98	4.98	3.53	173.95	148.5	170.23	126.63	198.24	170.28	204.73	198.86	183.72	180.23	203.29	135.85
BnaA01g04390D	3.98	3.32	4.74	3.44	254.84	230.59	337.03	268.54	4.42	3.94	3.57	3.23	3.51	3.23	4.99	4.57	4.67	3.58	3.88	2.86	304.21	234.42	225.88	191.44	255.83	244.5	349.27	302.59	359.24	303.75	296.21	205.67
BnaA01g04400D	0.03	0	0	0	0.67	0	0	0	0.1	0	0	0	0	0	0	0	0	0	0	0	2	0	0	0	0	0	0	0	0	0	0	0
BnaA01g04410D	0.16	0.26	0.26	0.06	1.67	2.67	3	0.67	0.18	0.11	0.2	0.53	0	0.25	0.27	0.19	0.33	0	0.08	0.09	2	1	2	5	0	3	3	2	4	0	1	1
BnaA01g04420D	10.83	11.92	7.03	14.36	233.27	281.37	168	377.67	10.61	10.07	11.8	10.13	13.94	11.69	6.53	7.57	6.98	15.32	13.65	14.12	246	202	251.82	202.55	343	298.57	154	169	181	438	352	343
BnaA01g04430D	3.75	2.23	4.34	1.36	57.33	37.67	74.01	25	3.96	3.24	4.04	1.48	3.5	1.72	3.72	4.18	5.13	1.29	1.32	1.46	65	46	61	21	61	31	62	66.02	94	26	24	25
BnaA01g04440D	6.83	13.7	11.97	25.81	209.55	452.55	406.84	961.44	7.1	7.6	5.78	16.07	10.49	14.54	13.25	12.62	10.05	21.97	30.37	25.08	235	217.57	176.08	459	368.74	529.92	446.51	402	372	896.75	1117.57	870
BnaA01g04450D	15.07	11.56	22.7	12.83	180.33	148.67	301.67	186.67	15.93	14.83	14.44	13.24	9.15	12.28	25.28	20.92	21.9	12.79	12.72	12.98	205	165	171	147	125	174	331	259	315	203	182	175
BnaA01g04460D	2.96	0.66	3.12	0.47	63.11	15.33	72.59	12	3.3	2.23	3.35	0.61	0.62	0.76	2.97	3.88	2.51	0.28	0.51	0.63	75.23	44	70.09	12	15	19	68.77	85	64	8	13	15
BnaA01g04470D	1.66	0.65	1.45	0.26	30.01	12.31	29.15	5.84	1.43	2.01	1.55	1.1	0.19	0.67	1.15	1.83	1.37	0.25	0.3	0.24	28	34.04	28	18.51	4	14.43	23	34.45	30	6	6.52	5
BnaA01g04480D	6.36	4.85	7.58	4.77	385.8	325.49	511.07	351.05	5.24	6.17	7.66	4.01	4.71	5.82	8.44	7.83	6.47	3.8	5.33	5.18	344.33	350.41	462.67	227	328.56	420.92	564	494.43	474.77	307.58	388.9	356.66
BnaA01g04490D	0	0	0	0	0	0	0	0	0	0	0	0	0	0	0	0	0	0	0	0	0	0	0	0	0	0	0	0	0	0	0	0
BnaA01g04500D	0	0	0	0	0	0	0	0	0	0	0	0	0	0	0	0	0	0	0	0	0	0	0	0	0	0	0	0	0	0	0	0
BnaA01g04510D	13.1	8.49	11.02	14.34	187.9	126.09	176.8	252.15	13.38	13.94	11.97	14.17	4.71	6.58	7.46	12.24	13.36	15.91	13.96	13.15	206.92	186.48	170.31	189	77.25	112.02	117.39	182	231	303.41	240	213.04
BnaA01g04520D	7.34	3.46	5.76	6.62	473.41	233.94	412.38	521.02	7.65	7.19	7.18	5.22	1.83	3.33	5.79	5.81	5.67	7.48	5.38	6.99	530.66	431.35	458.23	312.68	135.07	254.07	408.94	388.11	440.08	639.85	415.03	508.19
BnaA01g04530D	0	0	0.01	0.06	0	0	0.67	3	0	0	0	0	0	0	0	0	0.04	0.11	0.04	0.02	0	0	0	0	0	0	0	0	2	6	2	1
BnaA01g04540D	13.61	5.23	13.01	12.54	162.66	63.41	172.38	183.31	14.67	12.16	14	9.77	2.36	3.56	13.44	12.44	13.16	15.25	10.48	11.88	187.98	134.84	165.15	108	32.05	50.19	175.23	153.32	188.6	241.07	149.33	159.53
BnaA01g04550D	0.63	0.03	1.78	0.47	14.49	0.68	45.15	12.91	0.45	0.19	1.25	0	0	0.08	1.05	2.32	1.96	0.23	1.05	0.12	11.08	4	28.38	0	0	2.05	26.39	55.02	54.04	7	28.73	3
BnaA01g04560D	0.98	0.12	1.1	0.24	24.33	3	30	7.33	0.82	0.74	1.38	0.3	0	0.07	0.99	1.4	0.9	0.33	0.2	0.18	22	17	34	7	0	2	27	36	27	11	6	5
BnaA01g04570D	1.25	0.44	1.74	1.1	39.9	14.66	61.26	42.23	1.16	0.88	1.71	0.67	0.3	0.34	1.8	1.85	1.56	0.95	1.13	1.21	39.69	26	54	19.96	11	13.02	62.78	61	60	40.24	43	43.46
BnaA01g04580D	0.6	0.31	0.65	0.97	23	12.67	28.33	45.67	0.62	0.78	0.39	0.47	0.2	0.26	0.33	0.7	0.92	0.95	1.01	0.94	26	28	15	17	9	12	14	28	43	49	47	41
BnaA01g04590D	5.16	1.5	4.2	2.91	206.39	64.47	185.78	142.46	5.01	4.98	5.5	1.83	0.85	1.82	4.01	4.73	3.86	3.23	2.81	2.69	215.91	185.39	217.86	67.89	39	86.51	175.7	195.94	185.69	171.37	134.64	121.38
BnaA01g04600D	29.02	57.72	42.04	61.75	1703.63	3619.94	2729.3	4407.77	28.66	28.36	30.04	72.16	42.34	58.66	36.38	50.37	39.38	57.23	69.76	58.26	1812.29	1550.8	1747.8	3935.49	2841.28	4083.05	2340.74	3063.76	2783.4	4461.59	4903.06	3858.67
BnaA01g04610D	1.23	16.92	2.07	19.55	33.33	500	61.33	636.21	1.49	0.88	1.32	12.95	19.25	18.56	2.25	2.2	1.77	19.09	19.26	20.3	43	22	35	322	589	589	66	61	57	678.64	617	613
BnaA01g04620D	25.45	31.42	24.51	27.26	610.21	813.22	648.88	796.54	27.64	23.5	25.22	32.12	31.9	30.25	24.54	25.89	23.09	28.8	29.56	23.43	710.9	522.81	596.91	712.51	870.59	856.55	642.08	640.6	663.96	913.22	845.1	631.31
BnaA01g04630D	0.02	0	0	0	0.33	0	0	0	0	0.06	0	0	0	0	0	0	0	0	0	0	0	1	0	0	0	0	0	0	0	0	0	0
BnaA01g04640D	2.02	4.2	2.23	3.6	70.76	158.33	85.69	151.8	2.48	1.79	1.78	4.24	4.24	4.11	2.44	2.49	1.77	3.25	3.5	4.06	92.9	58	61.39	137.02	168.43	169.53	93.11	89.87	74.1	150.21	145.89	159.3
BnaA01g04650D	16.68	17.21	37.28	5.02	313.52	347.94	772.92	114.06	21.49	12.62	15.92	17.05	13.91	20.68	25.83	41	45	5.2	5.87	3.99	429.57	218.2	292.79	293.83	295	455	525.2	788.32	1005.23	128.2	130.48	83.49
BnaA01g04660D	21.96	11.13	15.38	11.35	846.16	469.11	659.66	534.64	20.98	24.04	20.85	10.79	9.91	12.69	18.71	13.92	13.5	12.23	9.27	12.54	873.59	865.7	799.19	387.67	438	581.67	792.83	557.62	628.53	627.85	429.18	546.89
BnaA01g04670D	1.7	2.24	2.67	0.94	82.97	119.57	142.81	55.22	2.31	1.49	1.3	1.5	2.67	2.54	3.24	2.37	2.4	1.07	1	0.74	119.91	67	62	66.92	147.08	144.72	171	118.13	139.3	68.2	57.46	40
BnaA01g04680D	2.19	0.1	2.1	0.09	39	2	41.23	2	2.35	2.53	1.7	0	0.05	0.24	3.43	1.59	1.28	0.13	0.05	0.1	45	42	30	0	1	5	66.94	29.32	27.42	3	1	2
BnaA01g04690D	0.14	0	0.08	0	1	0	0.67	0	0	0.15	0.28	0	0	0	0.13	0	0.11	0	0	0	0	1	2	0	0	0	1	0	1	0	0	0
BnaA01g04700D	20.21	21.12	15.85	16.79	735.64	815.36	638.89	744.76	19.33	19.18	22.12	28.03	17.38	17.94	18.86	15.27	13.41	16.78	16.97	16.62	758.14	650.6	798.18	948.08	723.55	774.46	752.57	576.02	588.09	811.34	740	682.94
BnaA01g04710D	4.32	1.51	6.47	3.32	62.67	24.33	103.67	57	3.08	2.3	7.59	0.82	2.3	1.4	6.36	7.2	5.85	1.61	3.69	4.65	48	31	109	11	38	24	101	108	102	31	64	76
BnaA01g04720D	5.88	2.09	2.07	1.01	82.92	32.33	32.33	17	5.65	6.38	5.62	1.75	2.66	1.85	2.65	1.91	1.65	0.69	0.95	1.38	86	84	78.75	23	43	31	41	28	28	13	16	22
BnaA01g04730D	4.51	6.75	3.45	2.35	182.19	302.28	155.62	115.71	4.29	4.49	4.76	4.02	12.16	4.06	2.98	3.42	3.95	2.59	1.99	2.46	186.86	169	190.72	150.73	561.6	194.51	131.77	143	192.09	138.83	96.27	112.04
BnaA01g04740D	305.48	340.99	314.24	257	4988.03	6027.75	5675.25	5084.67	289.86	319.79	306.8	376.25	270.54	376.18	378.62	321.52	242.59	214.52	278.21	278.26	5110.47	4876.1	4977.53	5720.99	5061.63	7300.64	6791.95	5452.79	4781	4663.14	5452	5138.88
BnaA01g04750D	1.12	75.48	1.01	71.4	47.5	3414.09	47.33	3651.04	1.06	0.89	1.42	89.12	59.07	78.25	1.32	0.73	0.97	66.26	73.35	74.59	48	35.01	59.48	3488.26	2845	3909	61	32	49	3707.46	3699.92	3545.75
BnaA01g04760D	8.92	5.42	8.99	4.68	417.62	275.8	467.56	267.48	8.96	8.75	9.06	5.28	5.98	5.01	8.53	9.39	9.05	5.1	4.53	4.4	451.46	381.28	420.11	229.55	320	277.86	437.5	455.32	509.87	316.64	253.6	232.2
BnaA01g04770D	10.93	9.33	6.75	7.93	439.48	408.15	301.65	389.14	11.05	11.07	10.66	8.98	10.04	8.97	6.06	7.35	6.85	8.19	8.07	7.52	478.56	414.84	425.04	335.42	461.31	427.72	267.12	306.36	331.47	437.44	388.79	341.19
BnaA01g04780D	7.13	6.55	7.21	7.63	100.63	99.05	112.52	132.29	7.46	8.43	5.5	8.02	5.8	5.84	8.23	7.78	5.63	8.38	7.73	6.79	113.69	111.12	77.09	105.36	93.78	98	127.55	114	96	157.49	131	108.38
BnaA01g04790D	13.82	12.28	4.64	4.42	145.92	138.67	54.47	56.54	13.33	13.61	14.51	15.38	8.36	13.09	6.6	3.56	3.77	4.32	3.24	5.7	151.77	134	152	151	101	164	76.42	39	48	60.62	41	68
BnaA01g04800D	4.6	2.18	3.02	2.82	99.33	50.13	72.11	73.13	5.12	4.13	4.54	2.67	1.32	2.54	3.31	2.91	2.84	2.53	2.41	3.51	118.54	82.73	96.71	53.26	32.43	64.69	77.99	64.81	73.53	72.2	62.05	85.15
BnaA01g04810D	0	0	0	0	0	0	0	0	0	0	0	0	0	0	0	0	0	0	0	0	0	0	0	0	0	0	0	0	0	0	0	0
BnaA01g04820D	0	0	0	0	0	0	0	0	0	0	0	0	0	0	0	0	0	0	0	0	0	0	0	0	0	0	0	0	0	0	0	0
BnaA01g04830D	0	0	0	0.03	0	0	0	0.33	0	0	0	0	0	0	0	0	0	0.08	0	0	0	0	0	0	0	0	0	0	0	1	0	0
BnaA01g04840D	14.01	6.11	6.38	7.06	485.39	228.36	244.75	296.49	14.94	12.69	14.4	6.03	7.28	5.01	4.92	7.37	6.84	7.06	6.86	7.26	555.48	408.07	492.63	193.16	287.01	204.9	186.21	263.7	284.34	323.48	283.46	282.53
BnaA01g04850D	10.6	3.07	3.78	2.73	298.77	93.46	118.44	93.49	10.42	10.56	10.82	3.26	3.03	2.91	3.08	4.31	3.95	2.22	3.83	2.13	316.46	277.38	302.46	85.51	97.68	97.2	95.27	125.97	134.08	83.11	129.46	67.91
BnaA01g04860D	2.95	3	1.98	2.93	94.66	105.22	71.5	114.42	3.73	3.06	2.05	2.26	4.3	2.43	1.66	1.57	2.72	3.36	2.72	2.7	128	91	64.97	67	156.66	92	58	52.02	104.47	142.25	104	97
BnaA01g04870D	12.11	10.18	11.92	9.79	288.02	262.31	313.3	282.37	12.32	10.42	13.6	9.95	10.95	9.65	12.2	12.37	11.19	9.59	10.25	9.52	314.46	230.06	319.53	219.2	296.65	271.08	316.9	303.75	319.25	301.76	290.78	254.56
BnaA01g04880D	23.05	19.51	11.04	25.69	429.57	396.42	228.92	582.65	23.2	20.93	25.02	17.93	20.06	20.53	5.53	14	13.58	27.14	23.11	26.82	464.77	362.69	461.25	309.81	426.63	452.81	112.69	269.93	304.14	670.38	514.66	562.9
BnaA01g04890D	88.68	177.24	92.06	194.37	1788.61	3871.42	2054.18	4775.71	85.44	87.82	92.79	187.65	163.19	180.89	66.48	119.48	90.22	194.36	188.18	200.57	1857.78	1651.46	1856.58	3518.95	3765.63	4329.67	1470.69	2499.07	2192.78	5210.64	4548.16	4568.33
BnaA01g04900D	0.77	0.29	0.83	0.13	17.3	7.58	20.51	3.44	0.8	0.5	1.01	0	0.31	0.56	0.91	0.76	0.81	0.15	0.19	0.04	19.13	10.36	22.4	0	7.8	14.95	22.24	17.54	21.76	4.31	5	1
BnaA01g04910D	17.36	8.69	15.37	6.49	503.57	272.61	492.94	227.62	18.63	16.09	17.37	9.23	6.18	10.67	16.71	15.27	14.14	5.81	7.29	6.37	579.82	433.2	497.7	247.86	204.18	365.79	529.29	457.3	492.22	222.82	252.25	207.79
BnaA01g04920D	15.48	10.93	7.93	7.1	133.64	101.33	76	75	16.4	14.35	15.7	12.14	9.96	10.68	9.12	6.95	7.72	8.14	6.89	6.28	152.03	115	133.89	97	98	109	86	62	80	93	71	61
BnaA01g04930D	0	0.11	0	0	0	1.67	0	0	0	0	0	0	0.21	0.13	0	0	0	0	0	0	0	0	0	0	3	2	0	0	0	0	0	0
BnaA01g04940D	0	0	0	0	0	0	0	0	0	0	0	0	0	0	0	0	0	0	0	0	0	0	0	0	0	0	0	0	0	0	0	0
BnaA01g04950D	0	0	0	0	0	0	0	0	0	0	0	0	0	0	0	0	0	0	0	0	0	0	0	0	0	0	0	0	0	0	0	0
BnaA01g04960D	0	0	0	0	0	0	0	0	0	0	0	0	0	0	0	0	0	0	0	0	0	0	0	0	0	0	0	0	0	0	0	0
BnaA01g04970D	0.92	0.17	0.54	0.09	36.33	8	23	4.33	0.66	0.68	1.43	0	0.11	0.41	0.81	0.61	0.19	0.02	0.15	0.11	28	25	56	0	5	19	35	25	9	1	7	5
BnaA01g04980D	7.03	3.16	12.45	3.55	349.82	172.32	691.13	214.01	7.26	6.81	7.01	2.73	3.46	3.3	10.91	12.43	14.01	3.2	3.79	3.66	388.79	315.19	345.48	125.83	196.62	194.51	594.5	640.14	838.76	211.48	225.45	205.11
BnaA01g04990D	0	0	0	0	0	0	0	0	0	0	0	0	0	0	0	0	0	0	0	0	0	0	0	0	0	0	0	0	0	0	0	0
BnaA01g05000D	0	0.05	0	0	0	0.33	0	0	0	0	0	0	0	0.14	0	0	0	0	0	0	0	0	0	0	0	1	0	0	0	0	0	0
BnaA01g05010D	1.47	0.31	1.42	0.62	55.67	13.33	59.67	28.67	1.56	1.2	1.66	0.11	0.37	0.45	1.8	1.08	1.39	0.64	0.69	0.54	63	42	62	4	16	20	74	42	63	32	31	23
BnaA01g05020D	1.64	1	1.11	0.36	19.33	13	14.3	5	1.58	1.28	2.06	0.73	1.19	1.08	1.48	1.07	0.77	0.26	0.43	0.38	20	14	24	8	16	15	19	13	10.9	4	6	5
BnaA01g05030D	0	0	0	0	0	0	0	0	0	0	0	0	0	0	0	0	0	0	0	0	0	0	0	0	0	0	0	0	0	0	0	0
BnaA01g05040D	1.21	1.2	1.51	0.77	43.33	47	59.67	33.67	1.23	0.85	1.56	0.88	1.43	1.28	0.9	1.9	1.73	0.91	0.85	0.55	47	28	55	29	58	54	35	70	74	43	36	22
BnaA01g05050D	0	0	0	0	0	0	0	0	0	0	0	0	0	0	0	0	0	0	0	0	0	0	0	0	0	0	0	0	0	0	0	0
BnaA01g05060D	23.13	2.2	11.08	3.28	366	38	196.86	62.92	24.67	26.96	17.76	2.11	2.15	2.34	2.14	15.08	16.03	3.17	2.48	4.2	421	398	279	31	39	44	37.21	247.62	305.75	66.76	47	75
BnaA01g05070D	8.82	6.65	3.92	7.47	171.06	141.67	85.19	176.65	8.47	8.8	9.2	5.6	7.35	7	2.96	3.91	4.88	8.05	5.96	8.4	177	159.17	177	101	163	161	63	78.58	114	207.38	138.57	184
BnaA01g05080D	8.3	19.89	8.35	32.51	246.04	646.45	276.96	1184.49	7.33	8.92	8.66	18.33	21.76	19.57	9.59	7.43	8.04	35.31	32.03	30.18	235.05	247.49	255.58	507.19	741.09	691.08	313.2	229.36	288.33	1396.91	1142.27	1014.28
BnaA01g05090D	7.89	28.36	6.28	41.36	172.45	683.26	152.77	1110.6	7.54	9.48	6.65	24.64	30.41	30.04	6.82	6.63	5.4	43.71	41.56	38.82	178.47	194	144.88	503	764	782.77	164.32	151	143	1275.7	1093.45	962.65
BnaA01g05100D	6.84	5.84	7.89	3.55	85.55	79.34	109.25	53.84	8.22	6.33	5.97	5.4	5.56	6.57	7.1	7.91	8.65	3.94	2.81	3.91	109.96	73.21	73.47	62.3	78.9	96.81	96.6	101.78	129.36	65	41.77	54.74
BnaA01g05110D	17.92	12.3	20.13	10.71	252.94	191.34	314.71	184.11	18.58	17.23	17.96	9.33	14.47	13.11	21.28	20.1	19	11.55	9.58	10.99	281.99	226.09	250.74	122.03	233	219	328.57	293.36	322.2	216.14	161.58	174.6
BnaA01g05120D	1.9	0.12	0.43	0.07	31.63	2.33	8	1.33	0.89	0.56	4.26	0	0.32	0.05	0.44	0.35	0.5	0	0.05	0.16	16	8.7	70.19	0	6	1	8	6	10	0	1	3
BnaA01g05130D	24.51	17.75	15.25	11.87	403.73	319.96	277.33	237.09	25.23	22.31	25.98	14.58	22.81	15.86	16.03	16.08	13.63	12.12	9.85	13.64	446.6	341.43	423.16	222.56	428.38	308.95	288.67	273.69	269.62	264.54	193.84	252.88
BnaA01g05140D	1.11	0.6	1.8	0.65	34.67	20	63.33	25	1.24	1.64	0.45	0.69	0.73	0.38	1.16	1.88	2.36	0.58	1.04	0.34	42	48	14	20	26	14	40	61	89	24	39	12
BnaA01g05150D	0	0	0	0	0	0	0	0	0	0	0	0	0	0	0	0	0	0	0	0	0	0	0	0	0	0	0	0	0	0	0	0
BnaA01g05160D	0	0	0.02	0	0	0	0.33	0	0	0	0	0	0	0	0	0	0.07	0	0	0	0	0	0	0	0	0	0	0	1	0	0	0
BnaA01g05170D	0.41	0.08	0.35	0.09	6	1.33	5.67	1.67	0.32	0.51	0.41	0.07	0.12	0.06	0.25	0.46	0.34	0.05	0.11	0.12	5	7	6	1	2	1	4	7	6	1	2	2
BnaA01g05180D	0	0	0	0	0	0	0	0	0	0	0	0	0	0	0	0	0	0	0	0	0	0	0	0	0	0	0	0	0	0	0	0
BnaA01g05190D	2.73	5.53	10.93	9.07	37.4	81.42	162.76	145.67	3.37	1.37	3.44	5.59	3.24	7.77	19.69	6.74	6.35	5.75	8.3	13.15	49	17.19	46	70	50	124.26	291.05	94.15	103.07	103	134	200
BnaA01g05200D	0	0	0	0	0	0	0	0	0	0	0	0	0	0	0	0	0	0	0	0	0	0	0	0	0	0	0	0	0	0	0	0
BnaA01g05210D	0	0.01	0.12	0.01	0	0.33	3.33	0.33	0	0	0	0	0.04	0	0.04	0.04	0.29	0	0	0.04	0	0	0	0	1	0	1	1	8	0	0	1
BnaA01g05220D	6.39	4.99	6.35	3.22	217.44	188.7	241.67	134.84	5.73	6.33	7.11	3.49	6.1	5.37	5.87	6.19	6.98	3.77	2.77	3.13	210.63	201.11	240.59	110.67	238.01	217.41	219.56	218.81	286.64	171	113	120.53
BnaA01g05230D	5.11	2.11	4.75	1.81	104.53	47.67	108.6	45.18	4.85	5.39	5.1	1.68	2.35	2.3	4.85	4.51	4.9	1.67	2.2	1.56	107.04	103	103.55	32	55	56	109	95.79	121	45.55	54	36
BnaA01g05240D	8.24	9.13	8.75	3.7	452.91	530.17	532.59	244.93	8.74	8.99	6.98	12.99	5.33	9.08	10.47	8.43	7.35	3.16	3.14	4.79	517.73	460.48	380.52	663.62	335	591.89	630.65	480.26	486.86	230.88	207	296.9
BnaA01g05250D	0	0	0	0	0	0	0	0	0	0	0	0	0	0	0	0	0	0	0	0	0	0	0	0	0	0	0	0	0	0	0	0
BnaA01g05260D	0	0	0	0	0	0	0	0	0	0	0	0	0	0	0	0	0	0	0	0	0	0	0	0	0	0	0	0	0	0	0	0
BnaA01g05270D	1.89	1.43	2.23	1.35	44.78	36.81	57.67	38.67	1.9	1.73	2.05	1.37	1.04	1.88	1.78	3.03	1.87	1.12	1.77	1.17	48.33	38	48	30	28	52.43	46	74	53	35	50	31
BnaA01g05280D	4.13	2.23	0.97	1.47	120.57	73.68	31.42	53.02	2.94	5.32	4.13	1.14	3.79	1.75	1.01	1.24	0.66	1.59	1.24	1.57	93.88	146.62	121.22	31.39	128.07	61.59	32.69	37.89	23.69	62.46	44	52.59
BnaA01g05290D	0.32	0	0.21	0	3.33	0	2.46	0	0.55	0.21	0.2	0	0	0	0.12	0.19	0.33	0	0	0	6	2	2	0	0	0	1.37	2	4	0	0	0
BnaA01g05300D	13.52	11.12	19.96	12.2	608.25	552.19	1000.9	671.44	13.05	14.76	12.76	8.87	13.21	11.28	17.53	21.59	20.75	12.52	12.11	11.98	634.04	620.25	570.47	371.85	681.35	603.36	866.89	1008.94	1126.87	750.28	654.06	609.97
BnaA01g05310D	0	0	0	0	0	0	0	0	0	0	0	0	0	0	0	0	0	0	0	0	0	0	0	0	0	0	0	0	0	0	0	0
BnaA01g05320D	61.44	66.25	125.94	81.22	1309.05	1497.52	2969.77	2093.33	65.75	63.92	54.66	87.7	47.61	63.45	105.53	147.85	124.43	63.69	108.25	71.72	1507	1267.14	1153	1733.73	1157.98	1600.85	2461.04	3259.99	3188.27	1800	2758	1722
BnaA01g05330D	0	0	0	0	0	0	0	0	0	0	0	0	0	0	0	0	0	0	0	0	0	0	0	0	0	0	0	0	0	0	0	0
BnaA01g05340D	0	0	0	0	0	0	0	0	0	0	0	0	0	0	0	0	0	0	0	0	0	0	0	0	0	0	0	0	0	0	0	0
BnaA01g05350D	0	0	0	0	0	0	0	0	0	0	0	0	0	0	0	0	0	0	0	0	0	0	0	0	0	0	0	0	0	0	0	0
BnaA01g05360D	0.03	0	0.17	0.09	0.33	0	1.67	1	0.1	0	0	0	0	0	0.4	0.11	0	0.17	0.09	0	1	0	0	0	0	0	4	1	0	2	1	0
BnaA01g05370D	3.76	9.56	5.09	7.62	111.67	306	169.67	275.67	3.94	3.83	3.5	10.76	8.51	9.42	4.51	4.64	6.12	7.24	8.35	7.28	126	106	103	297	289	332	147	143	219	286	297	244
BnaA01g05380D	25.15	20.75	38.47	20.86	613.28	550.89	1043.37	620.01	24.78	28.05	22.63	21.02	19.53	21.71	36.96	41.37	37.09	19.84	22.13	20.6	652.59	638.83	548.43	477.39	545.8	629.47	990.26	1048	1091.84	644.07	647.71	568.26
BnaA01g05390D	2.95	1.87	2.55	3.53	26.96	19.33	26.02	39.34	2.63	2.35	3.86	0.82	2.49	2.31	2.59	2.33	2.73	3.3	4.2	3.1	25.92	20	34.96	7	26	25	26	22.06	30	40.02	46	32
BnaA01g05400D	0	0.23	0.05	0	0	1.33	0.33	0	0	0	0	0.38	0	0.3	0.16	0	0	0	0	0	0	0	0	2	0	2	1	0	0	0	0	0
BnaA01g05410D	132.42	187.93	143.44	133.02	1341.06	2005.5	1612.03	1623.16	130.1	127.36	139.8	276.54	76.75	210.51	148.92	145.35	136.06	108.76	129.8	160.51	1418.87	1201.32	1402.99	2601.07	888.27	2527.15	1652.5	1524.86	1658.72	1462.37	1573.45	1833.65
BnaA01g05420D	0.07	0	0.05	0	1.33	0	1.33	0	0	0.21	0	0	0	0	0.04	0	0.12	0	0	0	0	4	0	0	0	0	1	0	3	0	0	0
BnaA01g05430D	0.08	0.04	0.13	0.08	0.55	0.33	1	0.67	0	0.25	0	0	0	0.12	0.13	0.14	0.12	0	0.12	0.13	0	1.65	0	0	0	1	1	1	1	0	1	1
BnaA01g05440D	0	0	0	0	0	0	0	0	0	0	0	0	0	0	0	0	0	0	0	0	0	0	0	0	0	0	0	0	0	0	0	0
BnaA01g05450D	2.89	1.86	2.72	1.09	178.29	125.79	183.91	81.34	2.87	2.89	2.91	1.74	1.06	2.77	3.51	2.93	1.71	0.95	0.89	1.44	190.91	166.12	177.85	99.68	74.69	203.01	237.47	187.05	127.21	78.03	66.06	99.93
BnaA01g05460D	0	0	0	0.11	0	0	0	0.67	0	0	0	0	0	0	0	0	0	0.34	0	0	0	0	0	0	0	0	0	0	0	2	0	0
BnaA01g05470D	0	0	0	0	0	0	0	0	0	0	0	0	0	0	0	0	0	0	0	0	0	0	0	0	0	0	0	0	0	0	0	0
BnaA01g05480D	3	3.74	2.93	4.13	71.5	96.69	77.06	118.9	3.35	2.47	3.17	3.72	2.74	4.77	2.32	3.46	3	3.39	5.35	3.66	85.5	54.58	74.41	82	74.11	133.96	60.32	85.09	85.76	106.86	151.86	97.99
BnaA01g05490D	5.91	3.23	6.76	2.07	317.01	193.09	398.44	134.95	6.2	5.9	5.62	1.89	4.27	3.52	6.14	8.63	5.51	1.86	2.56	1.79	357.79	294.64	298.59	94	261.73	223.54	360.5	479.3	355.53	132.44	164.42	108
BnaA01g05500D	0.57	0.05	0.1	0.17	8.33	0.67	1.67	3	0.44	0.51	0.75	0.15	0	0	0	0.07	0.23	0	0.28	0.24	7	7	11	2	0	0	0	1	4	0	5	4
BnaA01g05510D	3.02	2.6	2.61	2.83	454.28	425.57	436.75	520.83	2.41	3.23	3.42	2.7	2.72	2.37	2.24	3.14	2.44	2.48	3.47	2.54	393.19	456.56	513.09	379.52	470.77	426.41	371.72	492.81	445.71	498.27	629.11	435.11
BnaA01g05520D	0.05	0.01	0.04	0	1.33	0.33	1	0	0.04	0.04	0.08	0.04	0	0	0.04	0.04	0.03	0	0	0	1	1	2	1	0	0	1	1	1	0	0	0
BnaA01g05530D	20.4	18.14	22.5	20.32	471.73	459.18	583.29	576.6	19.99	22.03	19.17	16.18	22.36	15.88	20.36	21.38	25.77	23.71	15.86	21.4	499.07	475.68	440.43	348.5	592.44	436.59	517.16	513.51	719.2	729.8	440.2	559.79
BnaA01g05540D	4.82	4.16	4.97	5.61	85.93	80.67	97.46	121.67	4.68	4.28	5.49	4.05	3.78	4.64	7.05	4.75	3.12	5.28	6.42	5.12	89.79	71	97	67	77	98	137.65	87.73	67	125	137	103
BnaA01g05550D	0.13	0	0	0	1.67	0	0	0	0.23	0.09	0.08	0	0	0	0	0	0	0	0	0	3	1	1	0	0	0	0	0	0	0	0	0
BnaA01g05560D	1.9	1.97	1.51	1.66	39	44.06	34.29	41.03	2.14	1.47	2.08	1.74	2.1	2.07	1.25	1.71	1.57	1.33	2.17	1.48	47	28	42	33	49	50.17	28	36.2	38.67	36	53.1	34
BnaA01g05570D	0.24	0.08	0.07	0.07	3	1	1	1	0	0.25	0.48	0.17	0.07	0	0.14	0.08	0	0	0.07	0.14	0	3	6	2	1	0	2	1	0	0	1	2
BnaA01g05580D	0	0	0	0	0	0	0	0	0	0	0	0	0	0	0	0	0	0	0	0	0	0	0	0	0	0	0	0	0	0	0	0
BnaA01g05590D	0	0	0	0	0	0	0	0	0	0	0	0	0	0	0	0	0	0	0	0	0	0	0	0	0	0	0	0	0	0	0	0
BnaA01g05600D	0	0	0	0	0	0	0	0	0	0	0	0	0	0	0	0	0	0	0	0	0	0	0	0	0	0	0	0	0	0	0	0
BnaA01g05610D	5.36	3.89	7.42	4.97	236.97	186.19	362.43	266.96	5.15	5.52	5.4	4.09	4.02	3.56	6.83	9.09	6.34	4.26	5.98	4.67	245.87	227.92	237.13	168.26	203.38	186.94	331.64	417.32	338.33	250.53	317.19	233.16
BnaA01g05620D	5.83	0.64	4.94	1.34	137.7	16.73	128.6	37.95	6.02	5.66	5.81	0.46	0.59	0.86	5.77	5.19	3.86	1.02	1.17	1.83	152.91	124.41	135.79	10	16	24.18	149.21	126.81	109.79	31.99	33.07	48.78
BnaA01g05630D	0.02	0.02	0	0	0.67	0.67	0	0	0.03	0.04	0	0	0.06	0	0	0	0	0	0	0	1	1	0	0	2	0	0	0	0	0	0	0
BnaA01g05640D	0	0	0	0	0	0	0	0	0	0	0	0	0	0	0	0	0	0	0	0	0	0	0	0	0	0	0	0	0	0	0	0
BnaA01g05650D	0	0	0	0	0	0	0	0	0	0	0	0	0	0	0	0	0	0	0	0	0	0	0	0	0	0	0	0	0	0	0	0
BnaA01g05660D	8.92	3.98	8.52	6.12	266.79	127.87	282.04	222.8	10.65	7.87	8.23	4.17	3.73	4.03	8.49	8.09	8.98	6.73	6.55	5.08	340.48	217.66	242.24	115	126.61	142	276.33	248.82	320.98	265.36	232.89	170.16
BnaA01g05670D	21.03	11.15	18.91	7.07	600.8	341.59	600.46	246.44	21.45	21.43	20.2	13.1	10.52	9.84	19.82	18.55	18.36	7.43	6.71	7.07	659.94	570.43	572.02	347.71	343.61	333.45	620.54	549.15	631.7	282.04	229.43	227.85
BnaA01g05680D	0	0	0	0	0	0	0	0	0	0	0	0	0	0	0	0	0	0	0	0	0	0	0	0	0	0	0	0	0	0	0	0
BnaA01g05690D	5.46	2.62	5.78	2.69	188.39	98.18	221.59	113.77	5.54	5.91	4.94	2.59	2.77	2.5	7.18	5.04	5.13	2.94	2.85	2.28	206.12	189.91	169.14	83	109.3	102.24	271.6	180.09	213.07	134.96	117.71	88.63
BnaA01g05700D	0.06	0	0	0.03	0.67	0	0	0.33	0	0.1	0.09	0	0	0	0	0	0	0	0	0.08	0	1	1	0	0	0	0	0	0	0	0	1
BnaA01g05710D	0	0.04	0	0.06	0	0.33	0	0.48	0	0	0	0	0.12	0	0	0	0	0	0	0.17	0	0	0	0	1	0	0	0	0	0	0	1.43
BnaA01g05720D	42.19	12.27	43.22	11.19	674.23	212.64	769.29	215.53	43.57	36.6	46.4	12.6	8.52	15.7	46.51	36.73	46.43	9.32	12.42	11.84	747.33	542.93	732.42	186.45	155.06	296.4	811.66	606.04	890.16	197.03	236.74	212.82
BnaA01g05730D	0.08	0.13	0.12	0.09	1	2	2	1.67	0	0.23	0	0.16	0.06	0.18	0.13	0	0.24	0.27	0	0	0	3	0	2	1	3	2	0	4	5	0	0
BnaA01g05740D	0	0	0	0	0	0	0	0	0	0	0	0	0	0	0	0	0	0	0	0	0	0	0	0	0	0	0	0	0	0	0	0
BnaA01g05750D	0	0	0	0	0	0	0	0	0	0	0	0	0	0	0	0	0	0	0	0	0	0	0	0	0	0	0	0	0	0	0	0
BnaA01g05760D	0.84	1.22	1.56	1.02	14.64	23.33	30.69	22	0.63	1.03	0.85	1.28	1.23	1.14	1.55	1.69	1.45	0.98	1.23	0.85	12	17	14.93	21	25	24	30	31.07	31	23	26	17
BnaA01g05770D	0.33	0.12	0.26	0.05	11.33	4.87	10	2	0.13	0.46	0.4	0.06	0.15	0.16	0.44	0.19	0.14	0.04	0.02	0.08	5	15	14	2	6	6.62	17	7	6	2	1	3
BnaA01g05780D	3.68	2.81	10.67	5.39	35.67	30	114.33	63.33	3.27	2.45	5.33	2.23	2.18	4.02	11.54	10.5	9.98	4.84	6.92	4.41	34	22	51	20	24	46	122	105	116	62	80	48
BnaA01g05790D	0	0	0	0	0	0	0	0	0	0	0	0	0	0	0	0	0	0	0	0	0	0	0	0	0	0	0	0	0	0	0	0
BnaA01g05800D	1.56	0.87	1.07	0.59	41.01	25.33	32.33	19	1.41	1.67	1.6	0.65	0.96	0.99	0.79	0.73	1.7	0.48	0.76	0.54	40.02	41	42	16	29	31	23	20	54	17	24	16
BnaA01g05810D	2.06	1.21	2.46	1.04	60.78	39.25	80.63	37.48	2.17	1.72	2.28	0.99	1.24	1.41	2.71	2.14	2.52	1.06	1.22	0.85	68.8	47.01	66.52	26.98	41.76	49.01	87.34	65.33	89.23	41.48	42.91	28.06
BnaA01g05820D	4.81	7.97	9.4	7.35	103.14	188.65	223.43	192	5.43	4.51	4.49	5.5	9.95	8.47	6.47	11.03	10.7	7.9	7.67	6.48	124.83	89.58	95	109	242.65	214.3	151.3	244	275	224	196	156
BnaA01g05830D	3.68	2.58	1.32	3.02	86.67	64.78	34.54	86.36	3.62	4.14	3.29	3.42	1.56	2.76	1.86	1.05	1.06	3.16	2.13	3.76	92	91	77	75	42	77.33	48	25.62	30	99	60.08	100
BnaA01g05840D	23.64	30.01	20.88	16.46	895.25	1227.23	878.11	760.31	22.93	25.86	22.14	33.31	28.49	28.23	20.5	22.65	19.48	15.74	17.36	16.29	937.68	914.74	833.34	1174.85	1236.17	1270.66	853.16	890.92	890.24	793.8	789.22	697.9
BnaA01g05850D	0	0	0	0	0	0	0	0	0	0	0	0	0	0	0	0	0	0	0	0	0	0	0	0	0	0	0	0	0	0	0	0
BnaA01g05860D	0.48	0.28	0.13	0.52	4.67	2.67	1.33	6.33	0.38	0.44	0.62	0.66	0.09	0.09	0.19	0.2	0	0.69	0.43	0.45	4	4	6	6	1	1	2	2	0	9	5	5
BnaA01g05870D	0	0	0	0	0	0	0	0	0	0	0	0	0	0	0	0	0	0	0	0	0	0	0	0	0	0	0	0	0	0	0	0
BnaA01g05880D	0	0	0	0	0	0	0	0	0	0	0	0	0	0	0	0	0	0	0	0	0	0	0	0	0	0	0	0	0	0	0	0
BnaA01g05890D	6.61	0.5	3.63	0.36	96	8.33	58	6.33	6.41	5.41	8.01	0.07	1.15	0.29	3.72	4.07	3.1	0.47	0.29	0.31	100	73	115	1	19	5	59	61	54	9	5	5
BnaA01g05900D	5.83	0.75	4.24	2.41	156.97	21.36	126.67	79.72	5.23	6.11	6.16	0.96	0.71	0.57	3.93	4.82	3.96	2.84	1.68	2.71	152.2	153.73	164.97	24.01	21.81	18.25	116.29	134.87	128.85	102.04	54.4	82.73
BnaA01g05910D	0.09	0.05	0	0	1.67	1	0	0	0.05	0.12	0.11	0.06	0	0.09	0	0	0	0	0	0	1	2	2	1	0	2	0	0	0	0	0	0
BnaA01g05920D	24.6	31.82	11.3	12	728.43	1032.37	371.91	434.36	24.33	25.07	24.4	27.17	39.86	28.44	11.52	11.34	11.03	13.12	10.85	12.02	776.51	692.08	716.7	747.75	1350.07	999.28	374	348.14	393.58	516.21	384.99	401.87
BnaA01g05930D	0	0	0	0	0	0	0	0	0	0	0	0	0	0	0	0	0	0	0	0	0	0	0	0	0	0	0	0	0	0	0	0
BnaA01g05940D	0	0	0	0	0	0	0	0	0	0	0	0	0	0	0	0	0	0	0	0	0	0	0	0	0	0	0	0	0	0	0	0
BnaA01g05950D	10.1	7.28	14.06	9.23	167.52	131.14	259.3	185.5	9.4	10.37	10.54	7.44	7.26	7.13	14.43	14.4	13.34	8.25	8.49	10.96	168.35	160.52	173.69	114.91	137.99	140.52	262.9	248	267	182	169	205.5
BnaA01g05960D	0.96	0.87	0.54	0.61	18	17.67	11.33	13.67	0.79	0.63	1.45	0.92	0.47	1.21	0.58	0.46	0.58	0.44	0.67	0.71	16	11	27	16	10	27	12	9	13	11	15	15
BnaA01g05970D	0.02	0.05	0.04	0.03	1.33	3.37	3	2.45	0.01	0.03	0.02	0.04	0.08	0.03	0.01	0.07	0.04	0	0.03	0.07	1	2	1	2.21	5.81	2.09	1	5	3	0	2.44	4.9
BnaA01g05980D	4.96	3.95	4.78	3.62	98.51	84.33	106.19	87.67	4.96	5.76	4.15	4.7	3.69	3.47	4.99	4.53	4.83	3.78	2.6	4.49	106.54	107	82	87	84	81.99	109	93.57	116	100	62	101
BnaA01g05990D	5.15	1.71	2.42	1	292.69	103.93	152.29	69.97	5.73	4.97	4.74	1.95	1.78	1.4	2.63	2.36	2.27	1.25	0.89	0.86	349.78	262.29	266	102.8	115	94	163.56	138.57	154.75	94.29	60.61	55
BnaA01g06000D	1.64	1.41	0.93	1.44	61.17	57.93	39.27	66.41	1.22	1.75	1.94	1.35	1.53	1.36	1.15	0.73	0.92	1.47	1.85	0.99	49.63	61.44	72.45	47.21	65.71	60.86	47.48	28.66	41.66	73.47	83.47	42.29
BnaA01g06010D	16.13	17.02	11.25	11	495.92	572.86	380.3	410.2	17.71	14.15	16.54	13.47	20.93	16.67	10.91	12.83	10.01	11.41	10.72	10.86	583.47	403.06	501.22	382.53	731.54	604.51	365.66	406.53	368.71	463.24	392.5	374.87
BnaA01g06020D	17.36	13.98	7.93	7.61	496.64	430	252.39	268	17.77	18.6	15.71	16.05	13.08	12.81	9.59	7.02	7.19	8.92	7.85	6.07	548	496	445.91	427	428	435	301	208.18	248	339	269	196
BnaA01g06030D	2.63	54.44	3.92	107.9	92.67	2020.26	153	4651.2	2.29	2.64	2.97	79.67	39	44.65	4.44	4.15	3.17	112.36	104.73	106.62	87	87	104	2615.18	1575.04	1870.57	172	152	135	5272.41	4430.73	4250.46
BnaA01g06040D	18.74	5.98	23.34	8.18	260.33	89.81	361.33	138	18.13	20.35	17.75	6.72	4.74	6.48	26.4	21.62	22	7.73	7.26	9.55	272	264	245	87	75.42	107	403	312	369	143	121	150
BnaA01g06050D	0	0	0	0	0	0	0	0	0	0	0	0	0	0	0	0	0	0	0	0	0	0	0	0	0	0	0	0	0	0	0	0
BnaA01g06060D	0.04	0	0.01	0.03	1	0	0.33	1	0	0.04	0.08	0	0	0	0	0.04	0	0	0.1	0	0	1	2	0	0	0	0	1	0	0	3	0
BnaA01g06070D	0	0	0	0	0	0	0	0	0	0	0	0	0	0	0	0	0	0	0	0	0	0	0	0	0	0	0	0	0	0	0	0
BnaA01g06080D	0.04	0	0	0	1.33	0	0	0	0	0	0.11	0	0	0	0	0	0	0	0	0	0	0	4	0	0	0	0	0	0	0	0	0
BnaA01g06090D	0.4	0.08	0.09	0.04	8.67	2	2.33	1	0.47	0.35	0.37	0.05	0.04	0.16	0	0.13	0.15	0.07	0.04	0	11	7	8	1	1	4	0	3	4	2	1	0
BnaA01g06100D	9.95	2.86	6.06	2.5	280.83	88.47	191.54	86.33	9.09	11.54	9.21	2.86	1.97	3.74	6.29	5.74	6.14	2.33	2.59	2.59	278.11	305.19	259.19	75.42	64	126	195.78	169	209.84	88	88	83
BnaA01g06110D	0.46	0.04	0.2	0	6.33	0.67	3	0	0.33	0.54	0.5	0	0.12	0	0.13	0.34	0.12	0	0	0	5	7	7	0	2	0	2	5	2	0	0	0
BnaA01g06120D	0.1	2.55	0.04	5.16	3	78.69	1.33	181.33	0.19	0.07	0.03	3.24	2.03	2.39	0.09	0.03	0	4.68	5.6	5.21	6	2	1	87.06	67	82	3	1	0	180	194	170
BnaA01g06130D	11.13	20.1	12.96	33.79	141.91	273.88	182.33	523.78	11.6	10.53	11.25	24.49	14.9	20.91	13.7	14.03	11.16	33.2	36.3	31.86	159	124.82	141.9	289.49	216.67	315.49	191	185	171	561	553	457.35
BnaA01g06140D	0	0	0.05	0	0	0	0.33	0	0	0	0	0	0	0	0	0.15	0	0	0	0	0	0	0	0	0	0	0	1	0	0	0	0
BnaA01g06150D	0.1	0.13	0.06	0.06	1.33	2	1	1	0.07	0	0.22	0.08	0.13	0.19	0	0.07	0.12	0.06	0	0.13	1	0	3	1	2	3	0	1	2	1	0	2
BnaA01g06160D	5.47	1.61	4.3	1.74	94.55	29.91	82	36.33	6.75	3.71	5.95	1.62	1.64	1.58	3.53	4.44	4.94	1.51	2.63	1.09	124	59	100.65	25.72	32	32	66	78.47	101.53	34.27	53.73	21
BnaA01g06170D	1.3	0.88	0.57	0.1	25.51	19.63	12.18	2.37	1.52	0.95	1.42	0.18	1.91	0.56	0.39	0.85	0.47	0.08	0.13	0.09	31.94	17.2	27.38	3.34	42.68	12.88	8.36	17.12	11.06	2.09	3	2.02
BnaA01g06180D	36.92	38.77	23.96	26.78	1102.71	1263.68	796.32	980.16	37.77	34.37	38.62	33.48	49.36	33.46	21.78	24.06	26.04	31.01	26.51	22.81	1212.69	954.43	1141	927.01	1681.65	1182.37	711.51	743	934.46	1227.49	946	767
BnaA01g06190D	13.14	10.09	14.85	9.36	342.22	287.19	426.18	293.84	12.86	11.41	15.14	9.71	6.44	14.13	17.9	15.02	11.63	7.98	9.03	11.08	360.16	276.31	390.2	234.55	191.26	435.75	510	404.55	364	275.53	281	325
BnaA01g06200D	0	0	0	0	0	0	0	0	0	0	0	0	0	0	0	0	0	0	0	0	0	0	0	0	0	0	0	0	0	0	0	0
BnaA01g06210D	4.75	3.45	3.7	2.17	96.67	77.33	83.33	54	4.92	5.48	3.86	2.91	3.01	4.43	3.9	3.89	3.3	2.4	1.6	2.52	108	104	78	55	70	107	87	82	81	65	39	58
BnaA01g06220D	14.22	8.37	16.48	9.57	455.98	289.39	584.54	371.4	13.79	13.13	15.74	9.38	6.32	9.41	18.61	16.57	14.27	8.52	9.97	10.21	476.01	391.95	499.98	279.19	231.42	357.55	653.28	550.05	550.3	362.55	382.62	369.02
BnaA01g06230D	2.91	1.01	1.74	1.04	21.64	8.16	14.51	9.52	2.59	2.18	3.97	0.94	1.53	0.57	1.91	1.17	2.13	1.28	1.13	0.72	20.72	15.03	29.17	6.5	12.99	5	15.53	9	18.99	12.56	10	6
BnaA01g06240D	5.94	2.3	5.94	1.86	68.67	29.64	77.56	26.44	5.23	6.21	6.37	1.48	3.46	1.96	5.29	5.15	7.39	2.08	1.55	1.95	65.47	67.21	73.34	16	45.92	27	67.3	62	103.38	32.13	21.62	25.58
BnaA01g06250D	4.19	5.42	3.89	6.83	174.69	246.44	179.71	348.3	4.45	4.15	3.96	4.95	6.21	5.1	4	3.98	3.69	7.54	7.09	5.85	199.61	161.15	163.32	191.63	295.78	251.92	182.37	171.62	185.15	416.69	353.36	274.86
BnaA01g06260D	0	0	0	0	0	0	0	0	0	0	0	0	0	0	0	0	0	0	0	0	0	0	0	0	0	0	0	0	0	0	0	0
BnaA01g06270D	0.95	2.16	0.54	1.78	18	45.79	11	40.49	0.88	0.85	1.12	1.26	2.54	2.68	0.24	1.07	0.31	1.48	1.76	2.09	18	15	21	22.19	55	60.18	5	21	7	37.09	39.8	44.58
BnaA01g06280D	0	0	0	0	0	0	0	0	0	0	0	0	0	0	0	0	0	0	0	0	0	0	0	0	0	0	0	0	0	0	0	0
BnaA01g06290D	0	0	0	0	0	0	0	0	0	0	0	0	0	0	0	0	0	0	0	0	0	0	0	0	0	0	0	0	0	0	0	0
BnaA01g06300D	0.11	9.97	0.15	6.62	1.67	147.33	2.33	115	0.33	0	0	13.82	8.92	7.16	0	0.34	0.12	9.72	3.51	6.64	5	0	0	180	143	119	0	5	2	181	59	105
BnaA01g06310D	2.82	1.29	3.32	0.64	118.48	59.25	153.14	31.81	3.16	2.63	2.66	1.18	0.77	1.91	3.78	3.55	2.62	0.31	0.91	0.7	142.53	102.59	110.33	46	37	94.75	173.41	154	132	17	45.43	33
BnaA01g06320D	0	0.01	0	0	0	0.33	0	0	0	0	0	0	0	0.04	0	0	0	0	0	0	0	0	0	0	0	1	0	0	0	0	0	0
BnaA01g06330D	19.94	6.59	26.95	6.36	584.9	212.03	874.54	225.48	19.83	18.26	21.72	5.68	6.19	7.89	27.69	28.67	24.49	5.62	6.39	7.07	625.77	498.3	630.63	154.59	207.34	274.16	889.15	870.44	864.04	218.51	224.22	233.72
BnaA01g06340D	4.83	2.46	3.83	0.98	271.39	152.11	239.66	66.25	4.47	4.87	5.14	2.08	2.91	2.39	4.19	3.65	3.64	0.66	1.2	1.07	271.18	256	287	109	187.65	159.68	258.62	212.93	247.42	49.43	81	68.31
BnaA01g06350D	18.7	9.34	6.69	11.52	607.36	325.99	245.28	456.45	16.42	19.86	19.83	11.38	7.35	9.28	5.62	6.08	8.38	11.22	10.71	12.63	577.14	603.55	641.4	344.83	274.17	358.97	201	205.65	329.2	486.16	418.43	464.77
BnaA01g06360D	0	0	0	0	0	0	0	0	0	0	0	0	0	0	0	0	0	0	0	0	0	0	0	0	0	0	0	0	0	0	0	0
BnaA01g06370D	0.83	3.36	1.92	5.43	52.67	234.67	135.6	423	0.67	0.84	0.98	3.15	3.19	3.75	1.89	2.07	1.79	5.5	6.1	4.68	46	50	62	187	233	284	132	137	137.8	466	466	337
BnaA01g06380D	3.44	6.09	5.18	6.18	83.6	162.63	138.39	181.02	3.99	2.9	3.44	4.02	8.55	5.69	3.91	6.33	5.31	5.94	6.25	6.34	103.6	65	82.21	90	235.42	162.46	103.16	157.97	154.03	190.27	180.39	172.41
BnaA01g06390D	0.03	0	0.2	0.27	0.33	0	2.15	3	0.1	0	0	0	0	0	0.21	0	0.39	0.16	0.18	0.48	1	0	0	0	0	0	2.11	0	4.35	2	2	5
BnaA01g06400D	0	0	0	0	0	0	0	0	0	0	0	0	0	0	0	0	0	0	0	0	0	0	0	0	0	0	0	0	0	0	0	0
BnaA01g06410D	0	0.54	0.06	1.38	0	9.33	1	27	0	0	0	0.66	0.75	0.21	0	0.18	0	0.88	1.64	1.63	0	0	0	10	14	4	0	3	0	19	32	30
BnaA01g06420D	0.86	1.28	11.4	6.23	27.33	43.33	383	229.33	2.16	0.11	0.3	0.5	2.12	1.21	9.47	11.4	13.32	6.64	7.17	4.87	70	3	9	14	73	43	312	355	482	265	258	165
BnaA01g06430D	0.03	0.01	0.02	0.02	1	0.67	1	0.67	0.05	0.03	0	0	0	0.04	0.02	0.03	0.02	0	0	0.05	2	1	0	0	0	2	1	1	1	0	0	2
BnaA01g06440D	4.34	34.7	123.93	81.82	75.53	637.64	2248.65	1629.92	12.31	0.07	0.64	12.2	58.5	33.39	110.56	121.23	140.01	91.24	85.62	68.59	215.28	1.01	10.31	184	1086	642.93	1967.97	2040	2737.99	1967.93	1664.93	1256.91
BnaA01g06450D	0.07	0.23	0	0.31	0.33	1	0	1.67	0.2	0	0	0.7	0	0	0	0	0	0.16	0	0.77	1	0	0	3	0	0	0	0	0	1	0	4
BnaA01g06460D	1.76	3.71	2.61	3.11	50.03	115.96	82.03	106.29	2.01	1.48	1.79	2.63	4.6	3.9	2.17	2.89	2.78	2.38	4.11	2.85	61	39.02	50.06	69	148.47	130.4	67.13	84.52	94.44	89.16	139.04	90.67
BnaA01g06470D	0	0	0.04	0.01	0	0	1	0.33	0	0	0	0	0	0	0.04	0	0.08	0.04	0	0	0	0	0	0	0	0	1	0	2	1	0	0
BnaA01g06480D	0.26	0	1.18	0.59	1	0	5	2.54	0.51	0	0.28	0	0	0	1.01	0	2.53	0.54	0	1.23	2	0	1	0	0	0	4	0	11	2.61	0	5
BnaA01g06490D	333.14	515.98	367.62	374.09	3389.79	5679.67	4173.67	4681.13	277.44	351.74	370.23	589.55	455.29	503.11	440.18	339.82	322.85	418.28	321.34	382.66	3059	3354	3756.38	5606	5327	6106	4938	3604	3979.02	5686	3938	4419.38
BnaA01g06500D	0.13	0.17	0.06	0.06	1.67	2.67	1	1	0.07	0.16	0.15	0.08	0.38	0.06	0.07	0	0.12	0	0.18	0	1	2	2	1	6	1	1	0	2	0	3	0
BnaA01g06510D	0	0	0	0	0	0	0	0	0	0	0	0	0	0	0	0	0	0	0	0	0	0	0	0	0	0	0	0	0	0	0	0
BnaA01g06520D	15.89	8.56	11.13	4.96	240.68	140	188.52	92	17.37	14.66	15.64	8.42	10.09	7.16	8.53	10.73	14.14	5.69	5.09	4.11	282.18	206	233.86	118	174	128	141	167.73	256.84	114	92	70
BnaA01g06530D	40.79	53.69	22.04	49.06	1423.77	2017.72	856.17	2094.63	40.94	42.02	39.41	60.04	51.99	49.03	18.03	24.62	23.48	52.95	47.97	46.25	1539.9	1367.15	1364.25	1947.79	2075.29	2030.08	690.18	890.91	987.41	2455.59	2005.76	1822.55
BnaA01g06540D	498.24	351.68	22.63	71.11	8081.3	6299.9	413.43	1421.81	410.73	598.62	485.37	298.42	461.14	295.47	18.78	23.49	25.63	81.23	53.32	78.78	7241.47	9127.72	7874.71	4537.62	8627.81	5734.28	336.94	398.3	505.05	1765.65	1044.98	1454.8
BnaA01g06550D	0	0	0.24	0.02	0	0	4	0.33	0	0	0	0	0	0	0.25	0.07	0.4	0	0	0.06	0	0	0	0	0	0	4	1	7	0	0	1
BnaA01g06560D	0	0	0	0	0	0	0	0	0	0	0	0	0	0	0	0	0	0	0	0	0	0	0	0	0	0	0	0	0	0	0	0
BnaA01g06570D	1.18	0.2	0.44	0	14.67	2.67	6.03	0	1.41	0.57	1.56	0.18	0.43	0	0.74	0.24	0.35	0	0	0	18.55	6.47	19	2	6	0	10	3	5.09	0	0	0
BnaA01g06580D	0	0	0	0	0	0	0	0	0	0	0	0	0	0	0	0	0	0	0	0	0	0	0	0	0	0	0	0	0	0	0	0
BnaA01g06590D	0	0	0	0	0	0	0	0	0	0	0	0	0	0	0	0	0	0	0	0	0	0	0	0	0	0	0	0	0	0	0	0
BnaA01g06600D	1.63	12.44	0.75	13.44	19.33	160.31	9.67	195.33	1.41	1.45	2.04	12.6	11.43	13.29	0.62	1.22	0.42	15.16	12.53	12.62	18	16	24	138.92	155	187	8	15	6	239	178	169
BnaA01g06610D	13.5	26.84	17.49	32.17	276.59	591.14	395.54	806.97	12.69	10.84	16.97	30.43	20.72	29.36	20.82	17.04	14.6	38.23	27.78	30.49	279.41	206.48	343.89	577.81	484	711.62	466.45	360.91	359.26	1037.84	679.81	703.25
BnaA01g06620D	0.03	0.07	0	0.05	0.33	1	0	0.67	0.08	0	0	0	0.21	0	0	0	0	0	0	0.14	1	0	0	0	3	0	0	0	0	0	0	2
BnaA01g06630D	0	0	0	0	0	0	0	0	0	0	0	0	0	0	0	0	0	0	0	0	0	0	0	0	0	0	0	0	0	0	0	0
BnaA01g06640D	0.83	0.25	0.44	0.19	12	3.67	6.79	3.33	0.85	0.3	1.35	0.46	0	0.3	0.93	0.27	0.12	0.16	0.41	0	13	4	19	6	0	5	14.37	4	2	3	7	0
BnaA01g06650D	0	0	0	0	0	0	0	0	0	0	0	0	0	0	0	0	0	0	0	0	0	0	0	0	0	0	0	0	0	0	0	0
BnaA01g06660D	5.43	2.95	6.62	4.9	66	38.67	89.04	71.67	5.98	4.88	5.42	2.93	3.4	2.51	5.81	7.18	6.86	4.17	5.11	5.42	78	55	64.99	33	47	36	77.11	90	100	67	74	74
BnaA01g06670D	10.1	12.05	9.7	9.47	403.03	528.48	430.5	461.85	10.75	10.61	8.93	9.61	14.81	11.72	8.38	10.51	10.22	10.1	9.89	8.41	461.77	394.33	353	356	675.37	554.08	366.32	434.38	490.8	534.7	472.38	378.46
BnaA01g06680D	5.74	2.48	1.21	2.18	222.67	104.87	52.1	102.95	6.01	5.76	5.44	2.43	1.78	3.22	0.85	1.52	1.27	2.21	2.06	2.28	250.9	208	209.1	87.62	79	148	36	61	59.29	113.64	95.46	99.74
BnaA01g06690D	2	0.87	0.6	1.1	12	6	4	8.33	1.53	2.65	1.82	0.35	0.86	1.39	0.45	0.79	0.55	1.61	1.1	0.58	10	15	11	2	6	10	3	5	4	13	8	4
BnaA01g06700D	14.33	3.59	9.4	0.87	438.94	125.58	319.95	32.67	12.77	14.77	15.46	1.31	4.53	4.94	11.02	9.19	7.99	0.98	0.71	0.92	422.77	423	471.04	37.42	159.32	180	371.23	292.78	295.83	40.01	26	32
BnaA01g06710D	0.04	0.04	0	0	0.33	0.33	0	0	0.12	0	0	0.13	0	0	0	0	0	0	0	0	1	0	0	1	0	0	0	0	0	0	0	0
BnaA01g06720D	0	0	0	0	0	0	0	0	0	0	0	0	0	0	0	0	0	0	0	0	0	0	0	0	0	0	0	0	0	0	0	0
BnaA01g06730D	0.48	0.18	0.33	0.78	7.74	3.24	6.01	15.38	0.51	0.1	0.82	0.07	0.09	0.37	0	0.36	0.63	1.02	0.69	0.63	8.78	1.53	12.92	1	1.71	7	0	6	12.03	21.68	13.09	11.36
BnaA01g06740D	0.13	0.02	0.15	0.02	1.99	0.33	2.64	0.33	0.08	0.14	0.17	0	0	0.05	0	0.12	0.32	0.05	0	0	1.3	2	2.66	0	0	1	0	2	5.93	1	0	0
BnaA01g06750D	1.75	10.93	1.87	6.67	32.02	217	37.26	145.74	2.83	1.07	1.34	7.11	15.51	10.17	1	2.43	2.18	7.05	6.64	6.32	54.54	17.82	23.7	118.21	317.06	215.72	19.64	45.09	47.05	167.47	142.16	127.6
BnaA01g06760D	9.36	7.03	5.32	18.71	171.36	142	108.33	416.67	8.68	7.98	11.43	5.12	9.38	6.6	5.19	5.23	5.54	19.89	15.12	21.13	171	136	207.09	87	196	143	104	99	122	483	331	436
BnaA01g06770D	0.25	0.56	0.27	0.64	6	14.9	7.33	18.83	0.08	0.18	0.5	0.48	0.75	0.44	0.19	0.28	0.34	0.55	0.55	0.82	2	4	12	11	21	12.71	5	7	10	18	16	22.5
BnaA01g06780D	6.34	14.74	8.74	12.65	134.33	349	206	328.67	6.81	6	6.21	7.8	20.21	16.21	8.08	8.5	9.63	15.26	11.94	10.74	155	118	130	153	488	406	187	186	245	428	302	256
BnaA01g06790D	0.16	1.77	0.4	0.67	2	22.33	5.33	9.33	0.31	0.18	0	2.69	0.58	2.03	0.91	0.16	0.14	0.31	0.14	1.55	4	2	0	30	8	29	12	2	2	5	2	21
BnaA01g06800D	22.95	17.15	7.4	36.03	909.8	732.62	329.47	1747.75	21.31	25.88	21.67	20.08	15.61	15.77	5	8.28	8.93	36.21	36.24	35.63	914.05	960.11	855.23	742.62	710.7	744.55	218.41	341.63	428.36	1914.99	1727.48	1600.78
BnaA01g06810D	8.53	2.39	7.21	1.44	294.33	92	277.67	61.33	8.12	8.11	9.35	1.46	3.32	2.39	6.6	7.21	7.81	1.61	1.79	0.92	302	261	320	47	131	98	250	258	325	74	74	36
BnaA01g06820D	106.24	78.25	106.6	63.26	5525.07	4488.86	6150.93	4017.83	101.8	104.37	112.55	58.95	105.73	70.08	100.95	116.91	101.94	63.56	68.99	57.22	5707.47	5060.85	5806.88	2850.49	6290.81	4325.29	5758.45	6305.24	6389.09	4393.83	4299.3	3360.35
BnaA01g06830D	0	0.08	0	0.16	0	1.33	0	3.33	0	0	0	0.25	0	0	0	0	0	0.04	0.1	0.35	0	0	0	4	0	0	0	0	0	1	2	7
BnaA01g06840D	0	0	0	0	0	0	0	0	0	0	0	0	0	0	0	0	0	0	0	0	0	0	0	0	0	0	0	0	0	0	0	0
BnaA01g06850D	4.4	2.37	3.8	1.73	297.29	174.41	285.08	142.73	4.29	4.48	4.42	2.15	3.09	1.86	3.38	4.33	3.7	1.64	1.86	1.7	312.87	282.29	296.72	135.06	239.11	149.07	250.6	303.47	301.16	147.8	151	129.4
BnaA01g06860D	1.59	0.24	1.47	0.15	143.33	24.67	147.67	17	1.37	1.88	1.52	0.06	0.43	0.22	1.54	1.62	1.26	0.13	0.22	0.11	134	159	137	5	45	24	153	152	138	16	24	11
BnaA01g06870D	0.21	0.02	0.23	0	4	0.33	4.67	0	0.24	0.17	0.21	0.06	0	0	0.05	0.5	0.13	0	0	0	5	3	4	1	0	0	1	10	3	0	0	0
BnaA01g06880D	0.11	0	0.16	0	1	0	1.67	0	0	0.22	0.1	0	0	0	0.09	0.39	0	0	0	0	0	2	1	0	0	0	1	4	0	0	0	0
BnaA01g06890D	0.04	0.02	0.02	0	1.33	0.67	0.67	0	0	0.03	0.08	0	0	0.05	0	0	0.05	0	0	0	0	1	3	0	0	2	0	0	2	0	0	0
BnaA01g06900D	0.04	0.12	0	0.24	1	3	0	6.67	0	0	0.13	0.09	0.04	0.22	0	0	0	0.1	0.5	0.11	0	0	3	2	1	6	0	0	0	3	14	3
BnaA01g06910D	1.93	2.9	2.5	3.34	67.33	110.69	96.73	141.24	2.2	1.7	1.89	2.15	3.89	2.65	2.37	2.3	2.82	3.42	3.62	2.97	82	55	65	69.33	153.92	108.82	89.97	82.72	117.5	157.47	150.25	116
BnaA01g06920D	0	0	0	0	0	0	0	0	0	0	0	0	0	0	0	0	0	0	0	0	0	0	0	0	0	0	0	0	0	0	0	0
BnaA01g06930D	0	0	0	0	0	0	0	0	0	0	0	0	0	0	0	0	0	0	0	0	0	0	0	0	0	0	0	0	0	0	0	0
BnaA01g06940D	11.28	1.16	14.7	1.33	462	52.7	670.53	66.38	10.15	11.78	11.92	1.01	0.47	2	18.33	13.09	12.69	1.35	1.08	1.56	449.44	451.04	485.51	38.54	22	97.55	825.87	557.52	628.21	73.62	53.11	72.4
BnaA01g06950D	0	0.2	0	0.01	0	5	0	0.33	0	0	0	0	0.52	0.08	0	0	0	0.03	0	0	0	0	0	0	13	2	0	0	0	1	0	0
BnaA01g06960D	0	0	0	0	0	0	0	0	0	0	0	0	0	0	0	0	0	0	0	0	0	0	0	0	0	0	0	0	0	0	0	0
BnaA01g06970D	2.04	0.12	2.73	0.07	61.33	4	90.67	2.67	1.75	2.13	2.23	0.04	0.12	0.2	2.96	3.22	2	0.07	0.06	0.09	57	60	67	1	4	7	98	101	73	3	2	3
BnaA01g06980D	0	0	0	0	0	0	0	0	0	0	0	0	0	0	0	0	0	0	0	0	0	0	0	0	0	0	0	0	0	0	0	0
BnaA01g06990D	6.45	5.2	5.98	3.37	106.08	96.37	109.63	67.91	5.15	6.04	8.15	2.58	8.07	4.95	4.88	6.95	6.1	3.33	3.79	2.99	91.7	93.04	133.51	39.61	152.49	97	88.44	119	121.45	73.01	75.03	55.69
BnaA01g07000D	2.91	8.35	2.34	7.23	202.38	631.73	180.35	613.98	3.07	3.02	2.64	7.74	11.01	6.31	1.8	2.83	2.39	7.51	7.5	6.68	229.76	195.71	181.66	499.78	875.26	520.14	137.1	203.95	200	693.94	624.23	523.78
BnaA01g07010D	0.62	0.18	0.45	0.33	25.33	8.54	20.34	16.33	0.34	0.47	1.06	0	0.42	0.12	0.38	0.43	0.53	0.28	0.53	0.17	15	18	43	0	19.62	6	16.79	18.23	26	15	26	8
BnaA01g07020D	0.26	0.09	0.13	0.06	3.37	1.05	1.74	1	0.28	0.1	0.41	0.27	0	0	0.04	0.26	0.09	0.12	0.07	0	3.83	1.21	5.06	3.14	0	0	0.5	3.38	1.33	2	1	0
BnaA01g07030D	0	0	0	0	0	0	0	0	0	0	0	0	0	0	0	0	0	0	0	0	0	0	0	0	0	0	0	0	0	0	0	0
BnaA01g07040D	0	0	0	0	0	0	0	0	0	0	0	0	0	0	0	0	0	0	0	0	0	0	0	0	0	0	0	0	0	0	0	0
BnaA01g07050D	7.62	3.94	3.59	0.82	142.71	81.8	75.15	19.24	6.63	6.97	9.25	2.8	5.14	3.88	5.16	2.31	3.29	1.26	0.63	0.58	134	122	172.13	48.77	110.3	86.32	106.13	45	74.33	31.4	14.13	12.2
BnaA01g07060D	5.56	3.14	5.65	3.57	84.56	53.21	95.78	66.46	5.09	4.37	7.22	2.04	3.24	4.15	5.12	5.62	6.22	4	4.01	2.69	83.24	61.76	108.67	28.77	56.16	74.69	85.25	88.44	113.65	80.58	72.79	46
BnaA01g07070D	0.12	0.04	0	0	1.8	0.67	0	0	0	0.07	0.29	0	0.06	0.06	0	0	0	0	0	0	0	1.01	4.4	0	1	1	0	0	0	0	0	0
BnaA01g07080D	0	0	0	0.06	0	0	0	1	0	0	0	0	0	0	0	0	0	0	0	0.17	0	0	0	0	0	0	0	0	0	0	0	3
BnaA01g07090D	0.49	23.18	1.61	41.25	4.67	226.33	16.33	474	0.59	0.46	0.43	37.46	13.78	18.31	3.01	1.54	0.27	47.76	31.29	44.71	6	4	4	327	148	204	31	15	3	596	352	474
BnaA01g07100D	4.46	1.6	3.56	1.79	261.53	100.86	232.95	129.22	4.51	4.83	4.03	1.86	1.41	1.52	3.48	3.58	3.63	2.03	2	1.33	285.52	264.48	234.58	101.57	95	106	224	217.92	256.93	158.66	141	88
BnaA01g07110D	4	1.15	3.27	0.91	48.67	15.67	44.33	13.33	3.89	3.88	4.22	0.71	1.22	1.52	3.37	3.09	3.34	0.68	0.89	1.16	51	44	51	8	17	22	45	39	49	11	13	16
BnaA01g07120D	1.49	0.99	2.33	0.6	32.97	23.77	58	16.33	1.17	2.03	1.28	1.2	0.83	0.94	3.01	2.02	1.96	0.67	0.41	0.71	28.16	42.38	28.36	25	21.3	25	74	47	53	20	11	18
BnaA01g07130D	2.84	5.62	4.6	5.06	32.49	68.39	58.37	69.33	3.44	2.6	2.49	6.46	5.15	5.24	4.6	3.92	5.28	4.65	4.35	6.18	42	27.48	28	68	66.73	70.43	57.12	46	72	70	59	79
BnaA01g07140D	3.29	3.92	5.6	3.08	82.33	107.1	155	93	3.38	3.31	3.19	3.87	2.55	5.34	5.58	6.25	4.98	2.38	3.98	2.87	91	77	79	90	73	158.3	153	162	150	79	119	81
BnaA01g07150D	4.78	1.76	4.65	1.32	81.55	33.33	87.62	27.43	5.84	4.25	4.24	1.21	1.29	2.79	5.06	4.33	4.56	1.47	1.48	1.01	106.47	67.06	71.13	19	25	56	93.87	76	93	33	30	19.28
BnaA01g07160D	4.67	1.66	8.71	2.17	73.06	27.33	152.67	41.67	5.52	5.85	2.64	2.27	1.62	1.08	7.06	8.33	10.73	2.79	1.5	2.21	93	85.17	41	33	29	20	121	135	202	58	28	39
BnaA01g07170D	15.84	12.91	15.39	9.36	371.97	331.16	401.29	269	16.56	16.79	14.17	11.63	14.97	12.14	14.61	16.36	15.2	10.71	7.79	9.59	418.86	367.28	329.78	253.68	401.83	337.97	376	398	429.86	334	219	254
BnaA01g07180D	0	0.51	0	1.21	0	12.39	0	35.11	0	0	0	0.79	0.26	0.48	0	0	0	1.75	1.17	0.72	0	0	0	17	7	13.18	0	0	0	53.88	32.49	18.95
BnaA01g07190D	4.37	2.21	4.45	2.2	287.92	156.68	327.46	178	4.08	4.71	4.31	2.59	1.92	2.12	3.97	4.73	4.65	2.05	2.9	1.66	291	290	282.76	159.04	145	166	288	324	370.38	180	230	124
BnaA01g07200D	1.06	0.77	1.55	0.99	28.36	22.73	47.09	32.34	0.92	1.41	0.84	0.83	0.65	0.84	1.71	1.32	1.63	0.75	1.33	0.88	26.87	35.61	22.59	21	20.19	27	50.87	37.08	53.31	27.03	43	27
BnaA01g07210D	0.14	0.1	0.07	0.29	3	2.33	2	8	0.08	0.33	0	0.1	0.04	0.15	0	0.04	0.18	0.2	0.37	0.31	2	7	0	2	1	4	0	1	5	6	10	8
BnaA01g07220D	1.09	0.64	1.33	0.73	28.74	18.71	38.33	23	1.25	0.74	1.27	0.53	0.43	0.97	1.95	1.29	0.76	0.52	0.99	0.68	35.22	18	33	13	13	30.14	56	35	24	18	31	20
BnaA01g07230D	0	0	0	0	0	0	0	0	0	0	0	0	0	0	0	0	0	0	0	0	0	0	0	0	0	0	0	0	0	0	0	0
BnaA01g07240D	4.23	0.14	3.48	0.19	90.48	3.36	84.03	5	4.49	4.51	3.68	0	0.29	0.12	3.69	2.27	4.48	0.25	0.23	0.08	103.51	89.94	78	0	7	3.07	86.58	50.22	115.29	7	6	2
BnaA01g07250D	0.11	0.28	0.07	0.23	1	3	0.67	2.67	0	0	0.32	0.11	0.28	0.45	0	0.2	0	0.24	0.26	0.19	0	0	3	1	3	5	0	2	0	3	3	2
BnaA01g07260D	0.06	0	0	0	0.33	0	0	0	0.19	0	0	0	0	0	0	0	0	0	0	0	1	0	0	0	0	0	0	0	0	0	0	0
BnaA01g07270D	21.89	34.19	9.93	25.13	584.61	998.75	294.26	824.97	20.99	25.57	19.11	31.7	41.65	29.21	7.99	12.59	9.22	27.43	24.63	23.34	606.64	639	508.18	790.01	1277.16	929.09	235.03	350	297.75	977.25	791.2	706.45
BnaA01g07280D	18.43	9.45	12.92	6.89	326.66	177.63	253.74	148.9	19.25	20.81	15.24	13.1	4.94	10.3	19.38	10.13	9.26	7.69	4.51	8.48	368	343.98	268	216	100.26	216.63	377	186.3	197.92	181.22	95.74	169.74
BnaA01g07290D	4.99	2.37	3.04	1.9	49.59	25.26	34.12	23.11	5.89	5.59	3.5	2.72	1.33	3.05	3.41	1.58	4.12	2.45	1.22	2.03	62.84	51.56	34.37	25	15	35.79	37	16.21	49.15	32.18	14.5	22.64
BnaA01g07300D	0	0	0	0	0	0	0	0	0	0	0	0	0	0	0	0	0	0	0	0	0	0	0	0	0	0	0	0	0	0	0	0
BnaA01g07310D	0	0	0.06	0	0	0	1	0	0	0	0	0	0	0	0.13	0	0.06	0	0	0	0	0	0	0	0	0	2	0	1	0	0	0
BnaA01g07320D	1.27	0.33	0.92	0.53	27.67	7.67	22.33	13.67	1.46	1.14	1.22	0.45	0.24	0.31	0.72	0.85	1.19	0.38	0.5	0.7	34	23	26	9	6	8	17	19	31	11	13	17
BnaA01g07330D	2.56	0.62	2.85	0.87	40.67	11	50.33	16.67	2.52	2.1	3.06	0.34	0.83	0.69	3.12	2.38	3.05	0.71	1.11	0.78	43	31	48	5	15	13	54	39	58	15	21	14
BnaA01g07340D	15.56	24.91	14.53	30.14	345.47	603.67	358.79	818.23	15.47	14.95	16.27	23.2	23.94	27.6	14.25	14.36	14.98	34.36	25.58	30.48	369.61	308.99	357.82	478	607	726	346.38	330	399.98	1012.39	679.44	762.85
BnaA01g07350D	29.65	15.32	22.76	12.09	798.34	447.68	681.85	395.82	31.91	30.01	27.03	14.55	18.17	13.23	18.05	24.62	25.61	12.34	11.47	12.46	923.56	751.4	720.06	363.22	558.26	421.55	531.46	685.41	828.69	440.44	369.18	377.83
BnaA01g07360D	39.62	35.11	25.34	29.39	400	384.33	283.26	360.87	42.51	33.98	42.38	32.9	38.75	33.67	22.28	27.03	26.71	32.13	27.21	28.83	460	318	422	307	445	401	245.25	281.4	323.12	428.59	327.26	326.77
BnaA01g07370D	0	0	0	0	0	0	0	0	0	0	0	0	0	0	0	0	0	0	0	0	0	0	0	0	0	0	0	0	0	0	0	0
BnaA01g07380D	0	0.06	0.19	0	0	0.67	2	0	0	0	0	0	0	0.18	0.39	0	0.18	0	0	0	0	0	0	0	0	2	4	0	2	0	0	0
BnaA01g07390D	0	0	0	0	0	0	0	0	0	0	0	0	0	0	0	0	0	0	0	0	0	0	0	0	0	0	0	0	0	0	0	0
BnaA01g07400D	0	0	0	0	0	0	0	0	0	0	0	0	0	0	0	0	0	0	0	0	0	0	0	0	0	0	0	0	0	0	0	0
BnaA01g07410D	0	0	0	0	0	0	0	0	0	0	0	0	0	0	0	0	0	0	0	0	0	0	0	0	0	0	0	0	0	0	0	0
BnaA01g07420D	5.84	3.12	4.67	4.34	272.33	158	240.98	246.33	5.16	5.83	6.54	3.13	3.26	2.96	4.7	5.3	4	3.83	4.84	4.36	260	254	303	136	174	164	240.95	257	225	238	271	230
BnaA01g07430D	7.44	5.93	6.18	1.45	82.76	71.67	76.87	19.36	6.68	7.41	8.23	5.98	6.98	4.84	7.87	4.67	5.99	1.13	1.02	2.21	80.29	77	91	62	89	64	96.22	54	80.39	16.67	13.62	27.79
BnaA01g07440D	2.35	1.06	1.68	0.93	50	24.67	39.67	24	2.36	2.13	2.57	0.96	0.7	1.51	1.51	1.73	1.8	0.99	0.91	0.88	54	42	54	19	17	38	35	38	46	28	23	21
BnaA01g07450D	30.71	18.3	22.67	15.3	350.57	229.07	284.43	209.81	31.78	22.71	37.65	14.44	18.56	21.89	26.34	22.82	18.85	14.01	12.76	19.14	388.31	239.98	423.43	152.14	240.65	294.42	327.51	268.3	257.48	211.12	173.3	245.01
BnaA01g07460D	17.25	5.89	8.87	4.69	292.46	108.47	169	96.67	16.71	17.87	17.16	6.25	4.79	6.64	7.47	8.13	11	4.83	3.49	5.74	305.65	282.75	288.97	98.63	93	133.78	139	143	225	109	71	110
BnaA01g07470D	6.16	2.46	5.6	7.18	40.33	18.33	40.67	57.67	4.81	4.91	8.77	0.82	3.87	2.7	6.12	5.74	4.94	8.26	5.98	7.3	34	30	57	5	29	21	44	39	39	72	47	54
BnaA01g07480D	4.88	3.64	5.04	3.45	351.27	288.14	400.26	303.26	4.68	4.7	5.27	2.94	4.09	3.89	4.41	6.07	4.63	3.45	3.84	3.07	362.8	315.14	375.87	196.54	336.05	331.84	348.07	452.1	400.62	330	330.93	248.86
BnaA01g07490D	0	0	0	0	0	0	0	0	0	0	0	0	0	0	0	0	0	0	0	0	0	0	0	0	0	0	0	0	0	0	0	0
BnaA01g07500D	0	0	0	0	0	0	0	0	0	0	0	0	0	0	0	0	0	0	0	0	0	0	0	0	0	0	0	0	0	0	0	0
BnaA01g07510D	0	0	0	0	0	0	0	0	0	0	0	0	0	0	0	0	0	0	0	0	0	0	0	0	0	0	0	0	0	0	0	0
BnaA01g07520D	0	0	0	0	0	0	0	0	0	0	0	0	0	0	0	0	0	0	0	0	0	0	0	0	0	0	0	0	0	0	0	0
BnaA01g07530D	0	0.02	0	0	0	0.33	0	0	0	0	0	0	0	0.06	0	0	0	0	0	0	0	0	0	0	0	1	0	0	0	0	0	0
BnaA01g07540D	8.88	3.68	8.26	2.74	157.43	70.02	162.63	59.6	9.04	9.65	7.95	4.12	4.52	2.39	7.98	8.95	7.86	2.87	3.37	1.97	172.82	159.58	139.9	68	91.77	50.29	155.21	164.63	168.04	67.73	71.65	39.42
BnaA01g07550D	1.29	0.12	2.73	0.09	33.1	3.33	75.53	2.67	1.65	0.68	1.55	0.13	0.07	0.17	3.77	2.61	1.82	0	0.2	0.07	44.65	16	38.66	3	2	5	103.77	67.83	55	0	6	2
BnaA01g07560D	0	0	0	0	0	0	0	0	0	0	0	0	0	0	0	0	0	0	0	0	0	0	0	0	0	0	0	0	0	0	0	0
BnaA01g07570D	0	0	0	0	0	0	0	0	0	0	0	0	0	0	0	0	0	0	0	0	0	0	0	0	0	0	0	0	0	0	0	0
BnaA01g07580D	0	0	0	0	0	0	0	0	0	0	0	0	0	0	0	0	0	0	0	0	0	0	0	0	0	0	0	0	0	0	0	0
BnaA01g07590D	0	0	0	0	0	0	0	0	0	0	0	0	0	0	0	0	0	0	0	0	0	0	0	0	0	0	0	0	0	0	0	0
BnaA01g07600D	0.47	0.43	0.45	0.28	10.54	10.29	10.98	7.72	0.41	0.45	0.55	0.55	0.42	0.31	0.3	0.72	0.32	0.33	0.09	0.43	9.9	9.51	12.22	11.54	10.93	8.4	7.42	16.83	8.68	9.8	2.48	10.89
BnaA01g07610D	10.78	11.09	21.44	9.74	339.55	380.13	754.62	375.75	11.39	13.14	7.8	10.79	13.65	8.83	19.67	21.82	22.83	10.31	9.47	9.43	387.75	386.68	244.23	316.61	492.83	330.96	681.01	714.31	868.55	432.61	358.36	336.27
BnaA01g07620D	11.26	1.62	13	1.77	350.59	55.12	452.51	66.84	11.65	12.23	9.89	1.52	1.74	1.6	13.83	11.41	13.77	1.63	1.88	1.79	391.1	355.03	305.64	44.07	62.1	59.18	472.44	368.45	516.64	67.66	70	62.86
BnaA01g07630D	0.2	0.02	0.24	0.03	3.5	0.33	4.5	0.5	0.5	0.03	0.06	0	0.03	0.03	0.03	0.23	0.45	0.05	0	0.03	9	0.5	1	0	0.5	0.5	0.5	4	9	1	0	0.5
BnaA01g07640D	3.52	2.91	2.29	2.85	36.02	31.7	26.09	35	3.86	2.87	3.83	3.5	2.75	2.49	2.35	1.81	2.7	2.07	3.61	2.88	42.28	27.21	38.57	33.09	32	30	26.16	19.05	33.06	28	44	33
BnaA01g07650D	0.01	0.02	0.01	0.01	0.17	0.33	0.17	0.17	0	0.03	0	0	0.03	0.03	0.03	0	0	0	0	0.03	0	0.5	0	0	0.5	0.5	0.5	0	0	0	0	0.5
BnaA01g07660D	1.4	1.13	0.94	0.96	71.42	62.35	53.68	60.03	1.35	1.38	1.46	1.2	1.2	0.99	0.84	0.83	1.14	0.93	1.09	0.87	74.19	66	74.06	57.01	70.03	60	47	44	70.03	63.05	67.01	50.02
BnaA01g07670D	0	0.02	0.03	0.19	0	0.33	0.33	2.67	0	0	0	0	0	0.07	0	0.08	0	0.26	0.07	0.23	0	0	0	0	0	1	0	1	0	4	1	3
BnaA01g07680D	0.3	0.21	0.44	0.23	1.67	1.33	3	1.81	0	0.91	0	0.18	0.3	0.14	0.62	0	0.7	0.56	0.14	0	0	5	0	1	2	1	4	0	5	4.42	1	0
BnaA01g07690D	7.19	7.65	7.84	4.18	164.97	195.83	199.91	115.88	6.99	7.02	7.55	4.73	10.26	7.97	7.51	8.46	7.56	3.58	3.87	5.08	172.91	150.17	171.83	100.98	269.36	217.14	188.99	201.51	209.24	109.26	106.58	131.79
BnaA01g07700D	0	0	0	0	0	0	0	0	0	0	0	0	0	0	0	0	0	0	0	0	0	0	0	0	0	0	0	0	0	0	0	0
BnaA01g07710D	0	0	0	0	0	0	0	0	0	0	0	0	0	0	0	0	0	0	0	0	0	0	0	0	0	0	0	0	0	0	0	0
BnaA01g07720D	0.75	0.95	0.46	0.37	13.74	18.97	9	8.33	1.08	0.65	0.51	0.89	0.24	1.72	0.51	0.64	0.23	0.5	0.6	0	21	11	9.21	15	5	36.92	10	12	5	12	13	0
BnaA01g07730D	0	0	0	0	0	0	0	0	0	0	0	0	0	0	0	0	0	0	0	0	0	0	0	0	0	0	0	0	0	0	0	0
BnaA01g07740D	0	0	0	0	0	0	0	0	0	0	0	0	0	0	0	0	0	0	0	0	0	0	0	0	0	0	0	0	0	0	0	0
BnaA01g07750D	2.55	1.7	3.02	1.59	134.56	95.48	176.14	101.28	2.53	2.9	2.22	2.36	1.01	1.74	1.3	4.71	3.06	0.94	2.72	1.1	144.34	143.07	116.27	116	61	109.43	75.27	258.07	195.09	66	172	65.83
BnaA01g07760D	0	0	0	0	0	0	0	0	0	0	0	0	0	0	0	0	0	0	0	0	0	0	0	0	0	0	0	0	0	0	0	0
BnaA01g07770D	0.09	0.01	0.02	0	2.33	0.33	0.67	0	0.08	0.04	0.16	0.04	0	0	0	0.04	0.03	0	0	0	2	1	4	1	0	0	0	1	1	0	0	0
BnaA01g07780D	0	0	0	0	0	0	0	0	0	0	0	0	0	0	0	0	0	0	0	0	0	0	0	0	0	0	0	0	0	0	0	0
BnaA01g07790D	5.92	0.05	1.79	0.73	116.94	1	39.44	17.66	4.57	5.78	7.41	0.11	0	0.04	2.17	1.55	1.64	0.87	0.25	1.07	97.86	107.07	145.9	2	0	1	47.16	32	39.17	22.93	6	24.05
BnaA01g07800D	2.77	2.14	4.46	1.19	36.82	30.47	66.25	19.3	2.75	3.63	1.92	2.92	0.94	2.56	2.8	5.9	4.68	0.66	2.27	0.64	39.65	45.29	25.53	36.33	14.39	40.68	41.19	81.97	75.59	11.71	36.51	9.69
BnaA01g07810D	1.37	1.11	1.73	0.95	13.81	11.8	19.33	11.71	1.15	0.64	2.32	1.51	0.61	1.21	1.73	1.64	1.83	0.86	1.5	0.5	12.42	6	23	14	7	14.4	19	17	22	11.45	18	5.68
BnaA01g07820D	11.98	8.71	10.99	4.14	196.8	155.13	199.67	83	12.88	11.04	12.02	8.62	7.88	9.64	9.7	12.32	10.96	4.19	5.05	3.19	227	168.39	195	131	147.39	187	174	209	216	91	99	59
BnaA01g07830D	45.45	23.62	32.79	26.36	2294.27	1305.84	1836.58	1616.34	43.5	41.48	51.38	20.96	23.06	26.84	32.33	34.06	31.97	24.56	28.58	25.95	2363.71	1949.59	2569.52	982.39	1329.71	1605.42	1787.46	1780.46	1941.81	1645.7	1726.11	1477.22
BnaA01g07840D	0	0	0	0.01	0	0	0	0.33	0	0	0	0	0	0	0	0	0	0.03	0	0	0	0	0	0	0	0	0	0	0	1	0	0
BnaA01g07850D	0.07	0	0.02	0.04	1.33	0	0.33	1	0.1	0	0.11	0	0	0	0.05	0	0	0.08	0	0.05	2	0	2	0	0	0	1	0	0	2	0	1
BnaA01g07860D	50.84	38.22	39.18	41.19	1221.18	1000.33	1045.8	1206.54	52.92	50.39	49.2	35.72	39.93	39.02	36.4	40.51	40.62	44.44	37.72	41.4	1367.47	1126.06	1170.02	796.15	1094.91	1109.93	957.06	1006.93	1173.42	1415.72	1083.29	1120.6
BnaA01g07870D	0	0	0	0	0	0	0	0	0	0	0	0	0	0	0	0	0	0	0	0	0	0	0	0	0	0	0	0	0	0	0	0
BnaA01g07880D	0	0	0	0	0	0	0	0	0	0	0	0	0	0	0	0	0	0	0	0	0	0	0	0	0	0	0	0	0	0	0	0
BnaA01g07890D	0	0	0	0	0	0	0	0	0	0	0	0	0	0	0	0	0	0	0	0	0	0	0	0	0	0	0	0	0	0	0	0
BnaA01g07900D	0.2	0.24	0.17	0.65	1.67	2.33	1.67	6.67	0.22	0.13	0.24	0	0.62	0.1	0.21	0.11	0.2	0.53	0.49	0.94	2	1	2	0	6	1	2	1	2	6	5	9
BnaA01g07910D	29.8	8.24	17.37	9.15	1233.39	369.08	806.33	468.31	30.27	27.05	32.09	8.16	9.24	7.31	16.93	14.04	21.15	12.82	7.23	7.39	1346.38	1040.46	1313.32	313.06	436.29	357.9	766.35	600.85	1051.78	703.19	357.59	344.15
BnaA01g07920D	3.54	0.79	1.2	1.28	125.94	29.81	47.73	55.67	3.54	3.17	3.92	0.97	0.72	0.67	1.06	1.04	1.5	1.54	1.04	1.25	135.31	104.71	137.79	32	29.28	28.14	41.06	38.14	64	72.67	44.34	50
BnaA01g07930D	3.35	1.55	1.97	1.8	61.67	31	40.33	40.67	3.44	2.99	3.63	1.47	1.29	1.89	2.74	1.32	1.86	2.3	1.59	1.5	68	51	66	25	27	41	55	25	41	56	35	31
BnaA01g07940D	5.61	3.65	6.25	3.59	148.89	107.66	183.5	116	5.44	5.16	6.22	2.43	4.39	4.13	4.94	7.64	6.17	3.49	3.78	3.51	155.49	127.61	163.57	60	133	129.97	143.49	210	197	123	120	104.99
BnaA01g07950D	0.44	0.18	0.36	0.02	8	3.67	7.33	0.33	0.36	0.24	0.72	0.06	0.14	0.33	0.3	0.27	0.5	0	0.05	0	7	4	13	1	3	7	6	5	11	0	1	0
BnaA01g07960D	0.5	0.15	0.59	0.12	34.23	11.39	45.15	10.33	0.36	0.47	0.66	0.06	0.23	0.15	0.76	0.69	0.33	0.04	0.3	0.03	27	30.55	45.13	4.16	18	12	57.76	49.75	27.94	4	25	2
BnaA01g07970D	0.35	0.49	0.09	0.35	6	9	1.67	7.28	0.67	0.26	0.12	0.33	0.95	0.2	0.11	0.12	0.05	0.49	0.35	0.21	12	4	2	5	18	4	2	2	1	10.83	7	4
BnaA01g07980D	9.15	2.63	5.04	2.25	257.43	81.67	159.33	78.33	7.9	10.54	9.01	2.28	3.15	2.47	4.86	4.87	5.39	2.63	2.03	2.1	241	278.3	253	60	102	83	151	143	184	99	69	67
BnaA01g07990D	0	0	0	0	0	0	0	0	0	0	0	0	0	0	0	0	0	0	0	0	0	0	0	0	0	0	0	0	0	0	0	0
BnaA01g08000D	1.01	0.23	0.22	0.31	8.44	2.09	1.95	3.11	1.49	0.67	0.88	0.19	0	0.5	0.14	0.36	0.16	0.29	0.32	0.33	13.14	5.06	7.13	1.45	0	4.81	1.26	3.01	1.59	3.15	3.09	3.08
BnaA01g08010D	0.8	0.78	0.78	0.18	15.65	17.39	17.38	4.33	0.44	0.95	1.02	0.38	1.28	0.68	0.37	0.92	1.05	0.27	0.08	0.18	9.41	17.55	20	7	29.17	16	8	19	25.14	7	2	4
BnaA01g08020D	7.83	3.79	9.09	4.62	171.63	91.33	223.33	125.67	7.69	7.97	7.82	3.14	4.7	3.54	8.73	8.22	10.33	6.35	4.15	3.35	181.88	163	170	64	117.99	92	210	187	273	185	109	83
BnaA01g08030D	0	0	0	0	0	0	0	0	0	0	0	0	0	0	0	0	0	0	0	0	0	0	0	0	0	0	0	0	0	0	0	0
BnaA01g08040D	0.04	0	0	0	0.33	0	0	0	0	0.12	0	0	0	0	0	0	0	0	0	0	0	1	0	0	0	0	0	0	0	0	0	0
BnaA01g08050D	0.71	0.06	0.27	0.16	7	0.67	3	2	0.75	0.97	0.41	0	0.09	0.08	0.64	0.1	0.08	0.23	0.08	0.18	8	9	4	0	1	1	7	1	1	3	1	2
BnaA01g08060D	0.76	0.37	0.55	0.34	9.33	5.33	7.48	5.25	0.52	1.03	0.73	0.09	0.56	0.47	0.37	0.88	0.4	0.3	0.45	0.28	7	12	9	1	8	7	5	11.43	6	5	6.76	4
BnaA01g08070D	0.03	0	0	0.04	0.33	0	0	0.67	0	0	0.08	0	0	0	0	0	0	0.12	0	0	0	0	1	0	0	0	0	0	0	2	0	0
BnaA01g08080D	1.61	0	0.04	0	11.88	0	0.33	0	2.37	0.89	1.57	0	0	0	0	0	0.12	0	0	0	18.41	6	11.22	0	0	0	0	0	1	0	0	0
BnaA01g08090D	0	0	0	0	0	0	0	0	0	0	0	0	0	0	0	0	0	0	0	0	0	0	0	0	0	0	0	0	0	0	0	0
BnaA01g08100D	0	0	0	0	0	0	0	0	0	0	0	0	0	0	0	0	0	0	0	0	0	0	0	0	0	0	0	0	0	0	0	0
BnaA01g08110D	0	0	0	0	0	0	0	0	0	0	0	0	0	0	0	0	0	0	0	0	0	0	0	0	0	0	0	0	0	0	0	0
BnaA01g08120D	19.53	6.92	30.37	7.52	404.77	160.38	679.77	183.23	21.97	11.64	24.98	3.71	3.68	13.36	35.37	37.87	17.88	3.71	9.2	9.65	484.83	222.2	507.29	70.55	86.09	324.5	794.22	803.89	441.19	100.94	225.69	223.07
BnaA01g08130D	16.88	10.01	15.25	7.72	250.12	162.3	249.93	140.76	17.45	17.53	15.66	9.02	10.03	10.98	15.96	16.45	13.35	8.98	8.27	5.91	278.42	241.94	230	124.16	169.93	192.8	259.17	252.54	238.08	176.76	146.73	98.8
BnaA01g08140D	5.69	2.18	4.58	1.71	252.1	105.73	225.49	91.79	6.5	5.28	5.29	1.64	2.9	1.99	3.82	4.71	5.21	1.56	2.14	1.43	308.36	216.69	231.24	67.08	146.12	104	184.62	215.18	276.68	91.31	113	71.05
BnaA01g08150D	109.23	80.72	122.76	72.12	3787.13	3018.49	4693.52	3003.66	118.3	88.82	120.56	85.43	57.35	99.38	144.18	114.68	109.41	57.02	86.19	73.16	4391.65	2851.52	4118.21	2735.18	2259.29	4061.01	5445.6	4094.94	4540.02	2609.84	3556.27	2844.88
BnaA01g08160D	5.4	5.41	6.08	6.28	65	69.6	81	92	5.57	4.65	5.97	6.37	4.58	5.27	5.17	6.76	6.3	6.72	6.13	5.99	72	52	71	71	62.81	75	68	84	91	107	88	81
BnaA01g08170D	0.62	0.73	0.55	0.43	15.67	20.22	14.85	13.57	0.6	0.23	1.03	0.45	0.61	1.12	0.71	0.72	0.22	0.72	0.36	0.22	16.18	5.36	25.47	10.37	17.26	33.04	19.34	18.54	6.66	23.76	10.66	6.28
BnaA01g08180D	0	0	0	0	0	0	0	0	0	0	0	0	0	0	0	0	0	0	0	0	0	0	0	0	0	0	0	0	0	0	0	0
BnaA01g08190D	0	0	0	0	0	0	0	0	0	0	0	0	0	0	0	0	0	0	0	0	0	0	0	0	0	0	0	0	0	0	0	0
BnaA01g08200D	5.85	2.76	8.27	2.46	530.36	271.47	830.99	272.79	6.04	5.93	5.57	2.73	2.74	2.8	8.52	8.6	7.68	2.47	2.79	2.13	589.84	500.49	500.76	229.54	283.91	300.97	846.79	807.61	838.58	296.87	303.33	218.17
BnaA01g08210D	22.43	0.73	4.74	2.77	185.96	6.76	44.33	28.44	19.27	25.93	22.09	0.52	0.63	1.04	2.95	5.2	6.07	3.18	2.7	2.44	173.3	201.72	182.87	4	6	10.29	27	45	61	35.32	27	23
BnaA01g08220D	0.14	0.26	0	0.06	3.33	7.33	0	1.77	0	0.13	0.3	0	0.4	0.39	0	0	0	0.03	0.07	0.09	0	3	7	0	11	11	0	0	0	1	2	2.31
BnaA01g08230D	0	0.02	0	0.02	0	0.33	0	0.33	0	0	0	0	0	0.06	0	0	0	0.05	0	0	0	0	0	0	0	1	0	0	0	1	0	0
BnaA01g08240D	12.51	7.33	21.61	3.83	440.2	291.03	840.23	164.1	12	11.78	13.75	3.6	7.67	10.71	20.16	25.29	19.37	3.49	4.94	3.05	455.06	386.05	479.48	117.69	308.62	446.77	777.68	922.2	820.8	163.25	208	121.05
BnaA01g08250D	0	0	0.01	0	0	0	0.33	0	0	0	0	0	0	0	0	0	0.03	0	0	0	0	0	0	0	0	0	0	0	1	0	0	0
BnaA01g08260D	7.76	4.9	18.81	6.24	91.34	63.98	243.65	88.67	7.43	6.49	9.37	3.23	5.59	5.87	23.39	18.74	14.29	5.58	6.26	6.87	94.03	71	109	35.2	75	81.73	301	227.96	202	87	88	91
BnaA01g08270D	0.94	0.6	1.37	0.91	46.1	31.89	73.76	54.29	1.09	0.94	0.79	0.66	0.36	0.79	1.69	1.29	1.12	1.01	1.01	0.71	57.47	42.82	38	29.82	20	45.84	90.54	65	65.74	65.14	58.74	39
BnaA01g08280D	4.1	3.88	6.09	2.24	75.67	80.33	126	50.55	3.46	3.77	5.07	2.38	4.11	5.15	6.31	5.31	6.64	2.11	2.53	2.09	69	65	93	41	87	113	128	102	148	52	56	43.66
BnaA01g08290D	0.34	1.29	3.99	1.33	11.33	46.87	143.24	52.83	0.48	0.26	0.28	0.89	1.12	1.85	3.6	5.2	3.16	1.05	1.99	0.95	17	8	9	27	42	71.62	129	176.26	124.46	45.49	78	35
BnaA01g08300D	2.28	4.55	2.85	7.47	67.55	145.13	92.91	267.77	2.47	2.25	2.12	4.91	4.29	4.46	2.83	3.29	2.44	6.93	7.94	7.55	78.65	62	62	134.67	144.67	156.04	91.43	100.52	86.77	271.52	280.48	251.32
BnaA01g08310D	10.07	5.81	9.93	5.98	403.7	253.31	442.31	293	10.44	9.77	10.01	5.54	5.96	5.94	9.59	9.8	10.39	6.87	5.15	5.93	449.94	364.15	397	205.67	272.55	281.7	420.52	406.04	500.37	364.83	246.67	267.49
BnaA01g08320D	0.05	0.04	0.06	0.22	1	1	1.33	5.33	0.09	0	0.05	0	0.04	0.08	0.09	0.05	0.04	0.11	0.24	0.3	2	0	1	0	1	2	2	1	1	3	6	7
BnaA01g08330D	6.71	6.23	7.61	6.27	200.18	199.88	250.65	227.71	7.49	6.47	6.18	6.57	6.37	5.75	6.88	8.49	7.47	7.1	5.62	6.08	239.6	179.01	181.92	181.13	216.06	202.46	223.74	261.1	267.11	279.8	199.76	203.57
BnaA01g08340D	0	0	0.02	0	0	0	0.33	0	0	0	0	0	0	0	0.06	0	0	0	0	0	0	0	0	0	0	0	1	0	0	0	0	0
BnaA01g08350D	0	0	0	0	0	0	0	0	0	0	0	0	0	0	0	0	0	0	0	0	0	0	0	0	0	0	0	0	0	0	0	0
BnaA01g08360D	5.7	4.85	5.7	3.77	109.37	102.81	121.06	87.21	6.91	4.76	5.44	2.75	7.28	4.52	5.2	5.57	6.34	3.85	3.6	3.86	141.49	84.21	102.42	48.54	158.02	101.88	108.33	109.71	145.14	97.05	81.9	82.69
BnaA01g08370D	1.12	0.51	0.44	0.68	22.31	11.33	9.67	16.19	1.22	0.76	1.38	0.22	0.4	0.9	0.69	0.29	0.34	0.48	0.85	0.72	26	14	26.92	4	9	21	15	6	8	12.58	20	16
BnaA01g08380D	8.01	10.09	9.11	1.01	159.34	223.53	200.79	24.49	9.67	7.79	6.56	5.17	15.61	9.5	7.38	9.76	10.19	1.12	1.27	0.63	205.99	143.49	128.54	94.98	352.88	222.72	159.87	199.99	242.51	29.46	30	14
BnaA01g08390D	0	0	0	0	0	0	0	0	0	0	0	0	0	0	0	0	0	0	0	0	0	0	0	0	0	0	0	0	0	0	0	0
BnaA01g08400D	0	1.61	0.6	0	0	11.1	4	0	0	0	0	0.88	1.9	2.06	0.45	0.94	0.41	0	0	0	0	0	0	5	13.29	15	3	6	3	0	0	0
BnaA01g08410D	2.03	3.44	2.4	0.22	18.74	35.05	23.67	2.38	3.31	1.66	1.12	1.39	5.62	3.31	1.62	3.74	1.84	0.09	0.46	0.1	32.22	14	10	11.69	58	35.47	16	35	20	1.13	5	1
BnaA01g08420D	0.07	0	0	0	0.67	0	0	0	0.1	0.11	0	0	0	0	0	0	0	0	0	0	1	1	0	0	0	0	0	0	0	0	0	0
BnaA01g08430D	0.98	1.04	1.11	0.68	17.33	20.34	22.02	14.72	0.89	0.97	1.08	0.85	1.13	1.14	1.03	1.14	1.17	0.77	0.61	0.65	17	16	19	14	23	24.01	20	21	25.05	18.15	13.02	13
BnaA01g08440D	7.35	4.9	10.1	5.37	351.45	253.31	535.58	314.23	7.1	7.42	7.52	5.22	4.92	4.56	10.63	10.46	9.2	5.76	5.25	5.1	366.28	331.05	357.01	232.05	269.06	258.82	557.75	518.82	530.16	366.35	300.72	275.63
BnaA01g08450D	9.3	5	4.94	3.54	112	63.67	67.33	52	9.49	8.84	9.56	6.71	4.51	3.79	2.73	4.49	7.6	4.26	2.08	4.27	123	99	114	75	62	54	36	56	110	68	30	58
BnaA01g08460D	0.13	0.11	0.28	0.07	2.67	2.67	6.67	1.67	0	0	0.38	0	0.16	0.16	0.17	0.45	0.23	0.04	0	0.17	0	0	8	0	4	4	4	10	6	1	0	4
BnaA01g08470D	0	0	0	0	0	0	0	0	0	0	0	0	0	0	0	0	0	0	0	0	0	0	0	0	0	0	0	0	0	0	0	0
BnaA01g08480D	4.13	2.92	3.7	2.7	142	107	142.33	113.33	4.45	4.65	3.28	3.66	2.98	2.13	3.32	3.42	4.35	2.76	2.89	2.45	165	149	112	117	117	87	125	122	180	126	119	95
BnaA01g08490D	0.14	0.05	0.15	0.1	6.42	2.5	7.13	5.33	0.06	0.12	0.24	0.05	0	0.1	0.16	0.28	0	0.05	0.18	0.06	3	5.25	11	2	0	5.49	8	13.39	0	3	10	3
BnaA01g08500D	1.43	0.33	1.08	0.25	123.58	31.94	102.49	25.85	1.52	1.47	1.3	0.26	0.35	0.39	1.19	1.1	0.94	0.22	0.31	0.21	141.41	117.98	111.35	20.77	34.74	40.3	112.17	98.16	97.15	25	32.42	20.12
BnaA01g08510D	30.1	10.95	6.65	38.27	330.03	128.24	82.2	515.4	39.76	35.28	15.26	12.37	11.22	9.25	0.42	8.06	11.47	51.35	29.61	33.84	466.88	358.3	164.9	125.29	139.8	119.62	5	91.07	150.53	743.49	386.48	416.22
BnaA01g08520D	1.6	0.37	0.85	0.32	43	11	25.43	10.33	1.84	1.64	1.32	0.28	0.36	0.47	0.79	0.79	0.96	0.25	0.5	0.2	53	41	35	7	11	15	23.29	22	31	9	16	6
BnaA01g08530D	15.93	8.73	12.01	10.94	318.83	192.12	266.67	267.27	16.28	16.6	14.92	7.15	9.69	9.35	12.63	12.06	11.33	11.48	10.61	10.74	350.94	309.54	296	132.89	221.68	221.79	277	250	273	305.02	254.32	242.46
BnaA01g08540D	3.97	4	2.59	3.1	92.67	100.08	68.01	89.12	3.96	4.58	3.36	4.81	3.91	3.28	2.61	2.19	2.97	3.73	2.5	3.07	100	100	78	104.55	104.69	91	67	53.15	83.88	116.16	70.19	81
BnaA01g08550D	2.61	0.61	0.96	1.31	24	6.33	10	14.67	1.69	3.22	2.92	0.35	1.03	0.45	1.56	0.62	0.71	0.97	1.16	1.8	17	28	27	3	11	5	16	6	8	12	13	19
BnaA01g08560D	10.99	7.15	6.39	5.86	311.02	222.48	200.39	204.01	10.74	13.13	9.09	6.46	7.11	7.88	8.73	5.87	4.56	7.03	4.18	6.36	328.9	347.96	256.21	170.71	231.14	265.6	272.06	172.91	156.21	265.61	142.23	204.2
BnaA01g08570D	0	0	0	0	0	0	0	0	0	0	0	0	0	0	0	0	0	0	0	0	0	0	0	0	0	0	0	0	0	0	0	0
BnaA01g08580D	0	0	0	0	0	0	0	0	0	0	0	0	0	0	0	0	0	0	0	0	0	0	0	0	0	0	0	0	0	0	0	0
BnaA01g08590D	0	0	0	0	0	0	0	0	0	0	0	0	0	0	0	0	0	0	0	0	0	0	0	0	0	0	0	0	0	0	0	0
BnaA01g08600D	0	0	0	0	0	0	0	0	0	0	0	0	0	0	0	0	0	0	0	0	0	0	0	0	0	0	0	0	0	0	0	0
BnaA01g08610D	0.57	0.5	0.64	0.15	8.33	8.33	10.69	2.67	0.44	0.65	0.61	0.22	0.59	0.68	0.71	0.45	0.76	0.15	0.11	0.18	7	9	9	3	10	12	11.52	7	13.55	3	2	3
BnaA01g08620D	9.39	6.28	2.12	6.05	219.34	154.37	55.49	174.24	9.29	8.99	9.9	8.94	4.68	5.22	1.82	2.04	2.51	7.88	4.97	5.3	233.67	195.42	228.92	193.75	124.82	144.54	46.49	49.42	70.55	244.26	138.9	139.55
BnaA01g08630D	44.7	10.98	15.6	10.86	903.28	242.48	352.87	267.78	44.87	44.24	44.99	10.16	10.08	12.69	9.97	16.98	19.84	11.23	11.23	10.12	976.4	832.56	900.89	190.72	232.68	304.04	220.66	355.47	482.49	301.2	271.55	230.58
BnaA01g08640D	4.15	4.63	4.09	4.09	85.18	102.33	93	101.33	4.12	3.67	4.65	5.04	4.91	3.95	4.68	3.77	3.81	3.6	4.08	4.59	91	70	94.53	96	115	96	105	80	94	98	100	106
BnaA01g08650D	0.1	0.06	0.09	0.04	0.67	0.33	0.67	0.33	0.29	0	0	0.17	0	0	0.28	0	0	0	0.13	0	2	0	0	1	0	0	2	0	0	0	1	0
BnaA01g08660D	0	0	0	0	0	0	0	0	0	0	0	0	0	0	0	0	0	0	0	0	0	0	0	0	0	0	0	0	0	0	0	0
BnaA01g08670D	0	0	0	0	0	0	0	0	0	0	0	0	0	0	0	0	0	0	0	0	0	0	0	0	0	0	0	0	0	0	0	0
BnaA01g08680D	7.51	2.05	10.13	2.06	135.06	39.8	201.69	45.05	7.72	6.94	7.86	2.25	1.26	2.63	9.84	10.77	9.77	2.06	2.09	2.03	149.29	116.06	139.84	37.6	25.8	56	193.62	200.31	211.15	49	45	41.16
BnaA01g08690D	0.02	0.06	0.02	0	0.33	1	0.33	0	0	0	0.07	0	0.19	0	0	0	0.06	0	0	0	0	0	1	0	3	0	0	0	1	0	0	0
BnaA01g08700D	5.48	3.22	5.47	2.65	112.95	72	124.33	66.65	5.63	5.53	5.29	3.14	3.19	3.32	5.41	6.33	4.68	2.74	2.68	2.54	124.86	106	108	60	75	81	122	135	116	75	66	58.96
BnaA01g08710D	15.34	26.83	21.59	12.16	318.2	619.55	493.91	308.04	16.16	14.25	15.61	15.07	39.34	26.07	17.15	26.68	20.95	13.56	11.75	11.17	360.04	274.56	320	289.53	929.87	639.24	388.72	571.53	521.49	372.5	290.97	260.65
BnaA01g08720D	0	0	0	0	0	0	0	0	0	0	0	0	0	0	0	0	0	0	0	0	0	0	0	0	0	0	0	0	0	0	0	0
BnaA01g08730D	0	0	0	0	0	0	0	0	0	0	0	0	0	0	0	0	0	0	0	0	0	0	0	0	0	0	0	0	0	0	0	0
BnaA01g08740D	0	0	0	0	0	0	0	0	0	0	0	0	0	0	0	0	0	0	0	0	0	0	0	0	0	0	0	0	0	0	0	0
BnaA01g08750D	2.51	1.76	1.71	1.52	82.21	64.93	62.45	59.96	2.11	2.26	3.15	0.91	2	2.36	2.03	1.58	1.52	0.87	2.09	1.61	74.65	69.37	102.62	27.74	75	92.04	73.3	53.88	60.17	38	82.17	59.7
BnaA01g08760D	0.82	0.34	0.87	0.81	18.1	8.67	21.92	22.93	0.4	1.14	0.91	0.19	0.42	0.41	0.98	0.94	0.7	1.03	0.97	0.44	9.77	24.1	20.44	4	11	11	24.36	22.15	19.26	31.12	26.41	11.27
BnaA01g08770D	7.2	4.33	8.53	4.2	140.87	90.87	186.33	99.15	8.13	7.29	6.17	4.78	4.8	3.42	7.44	8.02	10.13	3.71	4.23	4.66	170.71	132.54	119.36	86.6	107	79	159	162	238	96.2	98.67	102.57
BnaA01g08780D	2.63	0.47	1.96	0.39	38.7	7.6	31.97	7.05	3.22	2.35	2.31	0.37	0.29	0.75	2.5	1.36	2.01	0.62	0.07	0.49	50.69	32	33.41	5.01	4.8	13	40	20.52	35.4	12	1.14	8
BnaA01g08790D	0	0	0	0	0	0	0	0	0	0	0	0	0	0	0	0	0	0	0	0	0	0	0	0	0	0	0	0	0	0	0	0
BnaA01g08800D	0.83	0.35	3.24	1.97	9.09	4	40.21	26.33	1.04	1.08	0.37	0.49	0.4	0.15	2.67	2.35	4.71	2.07	1.99	1.86	12.28	11	4	5	5	2	32	26.64	62	30	26	23
BnaA01g08810D	1.36	0.49	0.95	0.52	34.12	13	26.1	15.59	1.31	0.85	1.93	0.65	0.46	0.37	0.95	1.01	0.88	0.27	0.73	0.57	35	19.7	47.67	15	13	11	26	26	26.31	9	21.78	16
BnaA01g08820D	5.04	1.62	4.1	1.56	63	21.67	57	23.67	5.43	4.99	4.69	1.9	1.75	1.22	4.46	3.64	4.2	1.39	1.74	1.56	73	58	58	22	25	18	61	47	63	23	26	22
BnaA01g08830D	0.12	0.13	0.04	0	1.67	2	0.67	0	0.13	0.23	0	0.15	0.19	0.06	0.13	0	0	0	0	0	2	3	0	2	3	1	2	0	0	0	0	0
BnaA01g08840D	0	0	0	0	0	0	0	0	0	0	0	0	0	0	0	0	0	0	0	0	0	0	0	0	0	0	0	0	0	0	0	0
BnaA01g08850D	4.75	1.39	4.29	0.99	141.85	46	141.67	36.18	5.49	4.83	3.92	1.01	1.47	1.7	3.69	4.96	4.23	1.14	1	0.83	176	134.01	115.53	28	50	60	120.31	153.05	151.65	45	35.53	28
BnaA01g08860D	9.58	8.61	6.47	19.91	182.59	179.99	137.74	464.89	9.11	12.2	7.44	8.09	9.89	7.86	5.96	7.11	6.34	20.09	18.82	20.81	188.27	218.07	141.44	144.2	216.87	178.91	125.4	141.28	146.53	511.85	432.37	450.44
BnaA01g08870D	12.45	13.73	4.41	14.67	152.22	181.86	60.8	220.86	12.01	14.98	10.35	15.04	13.93	12.21	3.2	4.47	5.56	15.9	15.27	12.84	159	171.54	126.11	171.75	195.84	178	43.12	56.89	82.38	259.7	224.73	178.15
BnaA01g08880D	0	0	0	0	0	0	0	0	0	0	0	0	0	0	0	0	0	0	0	0	0	0	0	0	0	0	0	0	0	0	0	0
BnaA01g08890D	6.14	2.91	5.38	1.16	205.65	108.46	202.01	48.36	5.56	6.99	5.87	2.08	3.45	3.19	5.01	5.46	5.68	1.45	1.02	1.02	201.8	219.26	195.89	65	133	127.37	184.94	190.74	230.36	64.96	41.19	38.94
BnaA01g08900D	19.92	25.31	35.09	57.25	812.26	1122.75	1576.43	2830.58	21.44	16.37	21.95	23.11	23.88	28.93	32.51	39.4	33.37	58.09	58.45	55.21	936.38	618.18	882.21	870.66	1106.69	1390.89	1444.9	1655.36	1629.02	3128.28	2837.67	2525.79
BnaA01g08910D	11.08	7.22	4.12	4.27	150.33	107.67	62	70.33	9.03	12.56	11.66	6.53	9.28	5.86	6.94	3.11	2.31	3.74	3.3	5.77	133	160	158	83	145	95	104	44	38	68	54	89
BnaA01g08920D	14.5	13.56	12.85	14.36	153.51	158.14	151.67	183.91	14.78	12.31	16.4	10.14	16.08	14.47	12.36	11.62	14.56	14.56	10.98	17.55	168	121	171.53	99.42	194	181	143	127	185	204	138.73	209
BnaA01g08930D	1.69	1.09	2.28	1.02	60.54	42.53	90.61	44	1.75	1.43	1.9	1.02	1.01	1.25	1.87	2.37	2.59	0.91	0.73	1.43	67	47.52	67.09	33.74	41.18	52.66	72.95	87.63	111.26	43.28	31.26	57.46
BnaA01g08940D	1.94	1.69	2.58	1.63	99.01	95.16	146.84	101.6	1.63	2.01	2.18	1.61	1.36	2.11	2.37	2.96	2.42	1.38	2.06	1.45	90.01	96.15	110.86	76.83	79.96	128.69	133.57	157.5	149.45	93.92	126.64	84.25
BnaA01g08950D	5.45	3.93	3.86	2.58	213.7	166.95	168.67	122.95	5.27	5.66	5.42	4.28	3.27	4.25	3.81	3.93	3.85	2.43	2.77	2.53	223	207.12	210.99	156	146.93	197.92	164	160	182	126.84	130	112
BnaA01g08960D	0.04	0.01	0.06	0	0.78	0.33	1.33	0	0.04	0.07	0	0	0	0.04	0.04	0.14	0	0	0	0	1	1.35	0	0	0	1	1	3	0	0	0	0
BnaA01g08970D	0	0	0	0	0	0	0	0	0	0	0	0	0	0	0	0	0	0	0	0	0	0	0	0	0	0	0	0	0	0	0	0
BnaA01g08980D	0	0	0	0	0	0	0	0	0	0	0	0	0	0	0	0	0	0	0	0	0	0	0	0	0	0	0	0	0	0	0	0
BnaA01g08990D	1.4	0.28	0.47	0.17	49.7	11.35	18.43	7.16	1.88	1.95	0.38	0.15	0.35	0.35	0.16	0.76	0.5	0.18	0.17	0.15	71.68	64.26	13.17	5	14.32	14.74	6.08	27.71	21.51	8.48	7	6
BnaA01g09000D	0	0	0	0	0	0	0	0	0	0	0	0	0	0	0	0	0	0	0	0	0	0	0	0	0	0	0	0	0	0	0	0
BnaA01g09010D	0	0	0	0	0	0	0	0	0	0	0	0	0	0	0	0	0	0	0	0	0	0	0	0	0	0	0	0	0	0	0	0
BnaA01g09020D	1.03	1.77	1.13	0.53	19	36.33	24	12	0.95	1.44	0.7	1.16	3.1	1.04	0.98	0.67	1.74	0.61	0.31	0.67	19	25	13	20	66	23	20	13	39	15	7.01	14
BnaA01g09030D	3.42	0.92	3.16	0.59	52.28	15.67	54.42	11.13	3.06	4.46	2.75	0.7	1.13	0.93	3.08	2.88	3.52	0.65	0.43	0.69	50.84	64	42	10	20	17	52	46	65.27	13.38	8	12
BnaA01g09040D	1.39	0.76	1.37	0.65	65.97	39.6	72.93	37.28	1.1	1.56	1.52	0.65	0.83	0.79	1.39	1.22	1.49	0.55	0.52	0.87	56.63	69.28	72	28.96	45.06	44.78	72.56	60.4	85.84	34.88	29.97	47
BnaA01g09050D	0	0	0	0	0	0	0	0	0	0	0	0	0	0	0	0	0	0	0	0	0	0	0	0	0	0	0	0	0	0	0	0
BnaA01g09060D	1.99	0.91	2.05	0.48	65.31	32.39	73.99	19.11	2.52	2.03	1.43	0.74	1.17	0.81	2.21	2.11	1.83	0.53	0.46	0.45	88.25	61.48	46.19	22.36	43.47	31.33	78.92	71.18	71.88	22.88	18.02	16.43
BnaA01g09070D	0.31	0.12	0.07	0.27	5.82	2.46	1.51	6.3	0.1	0.08	0.74	0.07	0.11	0.17	0	0.15	0.07	0.37	0.24	0.19	2	1.37	14.09	1.28	2.36	3.75	0	3	1.53	9.49	5.41	4
BnaA01g09080D	0	0	0	0	0	0	0	0	0	0	0	0	0	0	0	0	0	0	0	0	0	0	0	0	0	0	0	0	0	0	0	0
BnaA01g09090D	0	0	0	0.02	0	0	0	0.67	0	0	0	0	0	0	0	0	0	0.05	0	0	0	0	0	0	0	0	0	0	0	2	0	0
BnaA01g09100D	0	0	0	0	0	0	0	0	0	0	0	0	0	0	0	0	0	0	0	0	0	0	0	0	0	0	0	0	0	0	0	0
BnaA01g09110D	17.59	7.4	20.64	6.04	283.5	127.66	369.31	117.58	17.23	18.52	17.01	9.2	5.26	7.73	22.52	20.79	18.6	4.76	6.45	6.92	299.68	278.54	272.27	138	96.99	148	398.47	347.77	361.69	102	124.75	126
BnaA01g09120D	5.26	2.4	3.54	2.28	44.84	22.35	33.51	24.27	5.34	5.48	4.97	2.25	1.77	3.17	3.94	3.51	3.18	3.36	2.53	0.94	49	43.53	42	17.81	17.25	32	36.85	31	32.67	38	25.81	9
BnaA01g09130D	1.07	0.05	1.15	0.01	34.31	1.67	41	0.33	0.98	1.06	1.16	0.07	0.03	0.05	1.02	1.32	1.11	0	0	0.03	33.94	32	37	2	1	2	35.99	44	43	0	0	1
BnaA01g09140D	2.67	3.45	4.55	4.3	30.33	41.5	56.93	59.31	2.53	2.46	3.02	4.77	2.09	3.5	3.79	5.86	4	4.14	4.35	4.4	31	26	34	50.33	27.08	47.08	47.13	68.93	54.72	62.39	59.2	56.34
BnaA01g09150D	2	1.76	2.12	3.05	26	24.67	30.67	49	1.93	1.74	2.33	1.91	1.42	1.95	1.48	2.45	2.43	3.77	3.8	1.57	27	21	30	23	21	30	21	33	38	65	59	23
BnaA01g09160D	11.61	6	12.77	4.87	132.56	75.08	161.75	67.67	12.28	12.03	10.52	5.38	5.31	7.32	13.44	12.61	12.25	4.82	5.2	4.58	150.85	127.88	118.94	57	69.23	99	168	149	168.26	73	71	59
BnaA01g09170D	0	0	0	0	0	0	0	0	0	0	0	0	0	0	0	0	0	0	0	0	0	0	0	0	0	0	0	0	0	0	0	0
BnaA01g09180D	2.02	0.77	1.4	1.28	14.69	6.33	11.33	11.33	1.64	2.48	1.93	0.44	1.07	0.8	2.48	1.05	0.68	1.02	1.13	1.68	13	17	14.07	3	9	7	20	8	6	10	10	14
BnaA01g09190D	0.09	0	0	0.15	0.33	0	0	0.67	0	0	0.27	0	0	0	0	0	0	0	0.44	0	0	0	1	0	0	0	0	0	0	0	2	0
BnaA01g09200D	32.36	52.09	39.13	67.16	194.97	333.41	264.42	505.61	25.5	38.33	33.25	73.54	46.96	35.76	18.96	53.19	45.25	95.4	42.05	64.04	167.11	217.28	200.51	415.68	326.6	257.95	126.45	335.32	331.48	770.87	306.34	439.62
BnaA01g09210D	0.46	0.16	0.19	0.23	5	2	2.33	3	0.61	0.1	0.66	0	0.25	0.24	0.09	0	0.47	0.21	0.39	0.08	7	1	7	0	3	3	1	0	6	3	5	1
BnaA01g09220D	2.63	0.59	2.03	0.72	72.03	17.52	61.13	24	2.72	2.13	3.03	0.43	1.08	0.25	1.93	2.26	1.89	0.75	0.77	0.65	80.02	54.1	81.96	11	33.55	8	57.71	63.77	61.91	27	25	20
BnaA01g09230D	0	0	0	0	0	0	0	0	0	0	0	0	0	0	0	0	0	0	0	0	0	0	0	0	0	0	0	0	0	0	0	0
BnaA01g09240D	0.03	0.14	0.24	0.02	0.67	3.33	5.67	0.67	0.04	0.05	0	0.1	0	0.31	0.25	0.27	0.19	0.03	0.04	0	1	1	0	2	0	8	6	6	5	1	1	0
BnaA01g09250D	5.22	1.35	4.03	1.61	69.42	19	59	26	5.26	4.53	5.88	1.79	1.06	1.21	4.55	4.08	3.45	1.71	1.7	1.41	75.12	55.9	77.23	22	16	19	66	56	55	30	27	21
BnaA01g09260D	1.48	0.48	2.28	0.88	53.48	18.59	92.06	39.1	1.59	1.54	1.32	0.53	0.45	0.46	2.2	1.93	2.71	1.1	0.8	0.75	61.76	51.65	47.04	17.78	18.39	19.61	86.68	72.04	117.45	52.58	34.35	30.37
BnaA01g09270D	37.78	25.57	38.23	25.03	837.69	616.02	933.53	665.41	41.76	30.44	41.13	23.96	20.75	31.99	42.7	37.51	34.47	21.52	23.32	30.26	990.6	624.61	897.86	490.33	522.28	835.45	1030.61	855.9	914.07	629.32	615.06	751.85
BnaA01g09280D	0.04	0.09	0.23	0.12	0.67	1.67	4.33	2.33	0.11	0	0	0	0.26	0	0.53	0.11	0.05	0.04	0.15	0.16	2	0	0	0	5	0	10	2	1	1	3	3
BnaA01g09290D	17.76	9.6	7.11	8.69	433.64	257.52	192.94	258.99	17.94	16.91	18.44	7.78	11.33	9.7	8.12	6.45	6.77	9.37	8.21	8.5	471.1	384.04	445.79	176.29	315.86	280.4	216.94	163.09	198.79	303.39	239.77	233.8
BnaA01g09300D	0	0	0	0	0	0	0	0	0	0	0	0	0	0	0	0	0	0	0	0	0	0	0	0	0	0	0	0	0	0	0	0
BnaA01g09310D	0.2	0	0.22	0.24	5	0	6.33	7.33	0.11	0.09	0.4	0	0	0	0.18	0.12	0.36	0.36	0.1	0.25	3	2	10	0	0	0	5	3	11	12	3	7
BnaA01g09320D	0	0	0	0	0	0	0	0	0	0	0	0	0	0	0	0	0	0	0	0	0	0	0	0	0	0	0	0	0	0	0	0
BnaA01g09330D	0.04	0	0.01	0	1.67	0	0.67	0	0.09	0.03	0	0	0	0	0.04	0	0	0	0	0	4	1	0	0	0	0	2	0	0	0	0	0
BnaA01g09340D	0	0	0	0	0	0	0	0	0	0	0	0	0	0	0	0	0	0	0	0	0	0	0	0	0	0	0	0	0	0	0	0
BnaA01g09350D	0	0	0	0	0	0	0	0	0	0	0	0	0	0	0	0	0	0	0	0	0	0	0	0	0	0	0	0	0	0	0	0
BnaA01g09360D	11.48	25	7.63	36.93	289.51	657.6	215.06	1142.18	10.93	11.67	11.85	39.33	17.35	18.33	7.85	7.03	8.02	43.07	29.78	37.94	297.24	274.6	296.7	922.75	500.98	549.07	217.27	184.03	243.89	1444.69	900.61	1081.23
BnaA01g09370D	4.41	0.5	5.76	0.51	142.64	17.93	206.05	19.71	4.04	3.73	5.45	0.37	0.54	0.59	6.44	5.98	4.86	0.38	0.67	0.47	140.85	112.47	174.6	11	20	22.8	228.37	200.45	189.34	16.13	26	17
BnaA01g09380D	14.03	10.87	14.03	7.55	140.33	117.67	156.33	92.67	14.3	13.96	13.82	10.44	15.84	6.33	12.96	14	15.12	9.56	5.1	7.98	154	130	137	97	181	75	142	145	182	127	61	90
BnaA01g09390D	5.95	2.2	5.41	3.07	78.82	31.76	80.35	49.26	5.48	5.58	6.79	1.94	3.1	1.55	4.42	5.25	6.55	2.63	3.23	3.35	78.23	69	89.24	23.92	47	24.37	64.27	72.21	104.58	46.32	51.26	50.2
BnaA01g09400D	4.96	2.48	6.43	2.89	52.73	28.67	76.55	36.21	5.54	4.47	4.88	2.34	2.4	2.71	6.65	4.62	8.02	1.57	2.9	4.19	63.02	44	51.17	23	29	34	77	50.64	102	22	36.64	50
BnaA01g09410D	0	0	0.1	0	0	0	1	0	0	0	0	0	0	0	0.11	0	0.2	0	0	0	0	0	0	0	0	0	1	0	2	0	0	0
BnaA01g09420D	1.45	0.33	1.62	0.14	62.42	16.37	77.95	7.41	1.04	1.9	1.42	0.18	0.28	0.54	1.55	1.8	1.5	0.24	0.1	0.07	48.9	77.06	61.3	7.12	14	28	74.23	81.16	78.46	14	5	3.22
BnaA01g09430D	1.38	0.1	1.52	0.21	47.07	4.03	57.73	9	1.07	1.54	1.52	0.03	0.13	0.15	1.17	2.16	1.24	0.2	0.29	0.15	39.73	49.47	52	1.08	5	6	44.16	77.44	51.6	9	12	6
BnaA01g09440D	0	0	0	0.03	0	0	0	0.38	0	0	0	0	0	0	0	0	0	0	0.1	0	0	0	0	0	0	0	0	0	0	0	1.14	0
BnaA01g09450D	0	0	0	0	0	0	0	0	0	0	0	0	0	0	0	0	0	0	0	0	0	0	0	0	0	0	0	0	0	0	0	0
BnaA01g09460D	0	0	0	0	0	0	0	0	0	0	0	0	0	0	0	0	0	0	0	0	0	0	0	0	0	0	0	0	0	0	0	0
BnaA01g09470D	1.3	0.54	1.77	0.32	36.51	16.33	54.33	11	1.65	0.91	1.35	0.51	0.51	0.61	1.88	1.82	1.62	0.44	0.36	0.16	49	23.43	37.09	13	16	20	57	52	54	16	12	5
BnaA01g09480D	1.36	0.68	1.8	0.62	52.58	29.39	77.15	29.24	1.3	1.3	1.47	0.48	0.58	0.99	2	1.9	1.51	0.71	0.55	0.59	54.24	46.96	56.55	17.21	25.55	45.41	84.97	76.1	70.37	36.57	25.4	25.74
BnaA01g09490D	0	0.06	0	0.35	0	0.72	0	4.81	0	0	0	0.11	0.08	0	0	0	0	0.29	0.59	0.16	0	0	0	1.15	1	0	0	0	0	4.32	8	2.12
BnaA01g09500D	0	0	0	0	0	0	0	0	0	0	0	0	0	0	0	0	0	0	0	0	0	0	0	0	0	0	0	0	0	0	0	0
BnaA01g09510D	0.58	0	1.12	0.1	6.93	0	14.46	1.37	0.66	1.09	0	0	0	0	1.32	1.84	0.21	0	0	0.3	8.57	12.21	0	0	0	0	17.44	22.9	3.04	0	0	4.12
BnaA01g09520D	5.54	34	8.29	21.63	122.67	811.09	203.51	585.66	5.55	6.9	4.17	39.32	34.5	28.18	9.99	8.46	6.42	21.19	21.92	21.79	133	143	92	812.64	877.27	743.37	243.52	195	172	626.07	583.92	546.99
BnaA01g09530D	14.43	20.51	16.52	24.78	374.48	578.97	474.8	784.98	14.87	13.94	14.49	19.38	22.02	20.13	15.58	17.81	16.16	26.19	25.74	22.42	414.97	336.47	372	466.47	652	618.45	442.39	478	504	901	798.52	655.41
BnaA01g09540D	31.33	17.07	20.38	18.02	379.67	228.01	272.79	263.87	34.49	23.69	35.81	10.67	25.66	14.87	19.38	20.81	20.96	18.31	17.15	18.59	446.81	265.37	426.84	119.18	352.74	212.1	255.42	259.37	303.57	292.38	247	252.23
BnaA01g09550D	3.5	2.49	5.74	3.26	37.67	29.67	68	43	3.48	2.21	4.82	1.41	3.69	2.37	4.19	6.88	6.15	3.88	4.15	1.75	40	22	51	14	45	30	49	76	79	55	53	21
BnaA01g09560D	1.03	1.22	1.39	2.68	42.67	56	63.67	134.67	1.1	0.91	1.07	0.86	1.4	1.41	0.97	1.7	1.49	2.68	2.52	2.83	49	35	44	33	66	69	44	73	74	147	125	132
BnaA01g09570D	0.36	0.05	0.23	0.04	7.33	1.33	5.33	1	0.18	0.16	0.74	0	0.04	0.12	0.31	0.09	0.28	0	0.04	0.09	4	3	15	0	1	3	7	2	7	0	1	2
BnaA01g09580D	0	0	0	0	0	0	0	0	0	0	0	0	0	0	0	0	0	0	0	0	0	0	0	0	0	0	0	0	0	0	0	0
BnaA01g09590D	0	0	0	0	0	0	0	0	0	0	0	0	0	0	0	0	0	0	0	0	0	0	0	0	0	0	0	0	0	0	0	0
BnaA01g09600D	0	0	0	0	0	0	0	0	0	0	0	0	0	0	0	0	0	0	0	0	0	0	0	0	0	0	0	0	0	0	0	0
BnaA01g09610D	0	0	0	0	0	0	0	0	0	0	0	0	0	0	0	0	0	0	0	0	0	0	0	0	0	0	0	0	0	0	0	0
BnaA01g09620D	5.97	5.96	9.2	9.55	91	99.33	154	179	6.07	4.11	7.73	4.55	7.86	5.46	8.74	10.4	8.45	13.29	7.62	7.73	99	58	116	64	136	98	145	163	154	267	138	132
BnaA01g09630D	0	0	0	0	0	0	0	0	0	0	0	0	0	0	0	0	0	0	0	0	0	0	0	0	0	0	0	0	0	0	0	0
BnaA01g09640D	14.34	50.51	18.11	46.99	517.54	1981.69	725.26	2068.55	14.69	14.07	14.27	48.78	52.02	50.73	14.53	20.8	19	48.6	49.11	43.26	570.2	472.57	509.84	1633.53	2143.44	2168.09	573.99	776.99	824.8	2326.61	2119.62	1759.41
BnaA01g09650D	3.58	2.59	4.86	2.11	191.36	151.16	287.99	139.18	3.74	3.46	3.53	2.35	2.79	2.64	5.23	4.86	4.49	2.63	1.97	1.74	215.07	172	187	116.49	170	167	306	268.97	289	186.55	126	105
BnaA01g09660D	0.32	0.19	0.37	0.27	5	3.33	6.33	5	0.48	0.28	0.19	0.14	0.28	0.16	0.47	0.43	0.21	0.15	0.48	0.17	8	4	3	2	5	3	8	7	4	3	9	3
BnaA01g09670D	0	0	0	0	0	0	0	0	0	0	0	0	0	0	0	0	0	0	0	0	0	0	0	0	0	0	0	0	0	0	0	0
BnaA01g09680D	0.13	0	0.04	0.04	1	0	0.33	0.33	0.12	0.14	0.13	0	0	0	0	0.13	0	0	0.11	0	1	1	1	0	0	0	0	1	0	0	1	0
BnaA01g09690D	17.62	4.08	8.23	3.49	509.33	129.33	269.83	123.67	16	23.69	13.17	3.98	4.29	3.96	4.51	8.9	11.27	3.1	3.92	3.46	503	644	381	108	143	137	144.29	269	396.2	120	137	114
BnaA01g09700D	7.12	1.88	6.14	2.22	136.97	40.67	131.33	52	6.92	7.41	7.03	1.17	1.68	2.8	4.74	7.31	6.38	1.95	2.64	2.07	143.71	133	134.21	21	37	64	100	146	148	50	61	44.99
BnaA01g09710D	8.51	8.49	7.19	5.98	270.65	297.42	255.68	232.54	8.63	9.21	7.7	6.75	10.1	8.61	7.29	6.51	7.77	6.4	6.11	5.42	296.02	273.01	242.91	199.74	367.65	324.87	254.48	214.85	297.72	270.36	232.75	194.5
BnaA01g09720D	3.88	0.47	6.86	1.11	73	9.67	145.67	25.33	3.09	4.3	4.26	0.45	0.51	0.45	6.45	6.11	8.02	0.91	0.79	1.64	63	76	80	8	11	10	134	120	183	23	18	35
BnaA01g09730D	11.25	5.58	10.12	4.47	292.5	156.67	291.33	141.21	12.42	10.04	11.3	5.41	6.33	4.99	8.96	10.64	10.76	4.77	4.17	4.48	346.06	241.87	289.56	130	187	153	254	285	335	163.81	129	130.82
BnaA01g09740D	19.27	69.06	10.39	129.27	538.13	2036.57	323.46	4380.37	20.18	21.42	16.21	96.9	51.09	59.18	6.43	12.6	12.13	116.47	134.98	136.37	607.71	557.7	448.99	2516.16	1632.37	1961.18	197	365	408.37	4323.25	4517.14	4300.72
BnaA01g09750D	0	0	0	0	0	0	0	0	0	0	0	0	0	0	0	0	0	0	0	0	0	0	0	0	0	0	0	0	0	0	0	0
BnaA01g09760D	0.08	0.03	0.08	0	1.28	0.54	1.66	0	0.06	0	0.17	0	0	0.08	0	0	0.25	0	0	0	1	0	2.85	0	0	1.62	0	0	4.99	0	0	0
BnaA01g09770D	15.31	5.34	18.22	6.42	270.33	101	358.33	137.33	16.32	15.64	13.96	6.29	4.91	4.83	20.9	15.49	18.27	6.15	6.01	7.09	310	257	244	103	99	101	404	283	388	144	127	141
BnaA01g09780D	0	0	0	0	0	0	0	0	0	0	0	0	0	0	0	0	0	0	0	0	0	0	0	0	0	0	0	0	0	0	0	0
BnaA01g09790D	0	0.02	0.03	0.05	0	0.33	0.67	1	0	0	0	0	0.05	0	0	0	0.1	0.09	0.05	0	0	0	0	0	1	0	0	0	2	2	1	0
BnaA01g09800D	6.15	10.25	5.43	7.31	108.33	193.67	107	158	6.43	6.28	5.73	11.68	10.93	8.14	4.25	5.48	6.56	8.85	6.12	6.95	122	103	100	191	220	170	82	100	139	207	129	138
BnaA01g09810D	4.04	2.31	3.34	2.28	121.31	76.67	110.78	84	4.46	4.41	3.26	1.65	2.89	2.39	2.53	4.07	3.41	2.66	2.17	2.01	144	122.98	96.94	46	99	85	83	126.34	123	106	78	68
BnaA01g09820D	2.33	0.57	2.76	1.28	121.56	32.53	159.55	81.33	2.07	2.13	2.78	0.6	0.38	0.74	2.67	3.08	2.53	1.16	1.65	1.03	116.62	103.86	144.21	29.32	22.62	45.65	152.67	166.83	159.16	80.5	103	60.48
BnaA01g09830D	9.87	4.95	8.91	5.2	405.79	219.24	406.98	260.67	10.62	9.71	9.29	5.2	5	4.64	7.79	9.36	9.59	5.54	5.21	4.86	468.98	370.84	377.56	198.06	234.21	225.44	350.14	397.7	473.1	301.56	255.82	224.62
BnaA01g09840D	5.41	1.98	3.54	2.24	310.97	126.31	227.31	155.82	5.17	5.62	5.44	1.45	1.87	2.61	3.88	3.24	3.51	1.81	2.43	2.49	320.89	301.69	310.34	77.52	122.86	178.54	244.81	193.56	243.55	138.52	167.39	161.54
BnaA01g09850D	2.44	1.73	4.01	3.13	44	34.33	80.01	69.02	2.26	2.67	2.4	1.49	1.74	1.96	4.69	4.37	2.98	3	3.55	2.84	44	45	43	25	36	42	93.01	82.01	65	72.07	77	58
BnaA01g09860D	13.7	56.69	11.64	123.71	521.5	2347.58	490.78	5719.58	14.71	13.75	12.63	54.68	52.9	62.48	12.19	11.8	10.93	118.79	132.4	119.93	601.92	486.81	475.77	1930.01	2297.76	2814.96	507.64	464.59	500.12	5994.4	6022.95	5141.39
BnaA01g09870D	10.04	16.74	10.3	20.13	188.63	342.15	216.36	462.98	10.1	11.48	8.53	16.68	17.97	15.56	9.4	10.25	11.24	21.33	19.17	19.9	205	201.52	159.37	292	386.88	347.57	194	200	255.08	533.58	432.37	423
BnaA01g09880D	18.57	10.21	18.04	9.65	234.33	140.33	253.67	149	17.31	19.84	18.57	10.46	8.78	11.39	17.51	18.83	17.78	9.58	10.49	8.89	236	234	233	123	127	171	243	247	271	161	159	127
BnaA01g09890D	8.93	1.76	8.19	2.09	274.2	59.48	280.07	77.76	8.78	10.03	7.98	1.43	1.99	1.85	7.69	8.72	8.15	1.69	2.14	2.45	291.26	287.69	243.64	40.92	70	67.53	259.66	278.19	302.37	69.28	79	85
BnaA01g09900D	130.96	35.37	199.16	15.93	4181.62	1218.42	7095.71	615.41	134	157.64	101.25	42.63	18.4	45.08	212.43	190.67	194.39	9.57	25.7	12.53	4624.51	4705.08	3215.28	1268.79	673.85	1712.61	7458.98	6329.47	7498.68	407.24	986	453
BnaA01g09910D	2.41	2.68	2.71	4.33	102.61	123.33	127.33	223.33	2.31	2.14	2.77	2.88	2.28	2.87	2.53	3.09	2.5	3.84	4.83	4.31	106	84.82	117	114	111	145	118	136	128	217	246	207
BnaA01g09920D	3.18	3.17	3.63	3.27	67.21	71.92	85.17	84.79	3.24	2.8	3.49	3.57	3.15	2.8	3.33	3.71	3.84	3.74	3.31	2.77	73.64	55	73	69.91	75.85	70	76.86	81.14	97.52	104.76	83.63	65.99
BnaA01g09930D	6.48	5.6	4.49	6.21	220.61	208.79	170.97	257.45	6.79	6.12	6.52	4.83	5.66	6.3	4.57	3.79	5.11	6.51	5.78	6.35	248.49	193.65	219.69	152.65	219.85	253.86	170.29	133.64	208.99	293.9	235.13	243.33
BnaA01g09940D	49.47	339.62	45.82	1359.6	779.77	5978.19	799.52	25959.2	59.42	53.95	35.03	186.37	423.95	408.55	25.49	59.62	52.36	1324.93	1346.29	1407.59	1004.96	789.19	545.17	2718.62	7609.54	7606.42	438.58	969.99	989.98	27629.3	25310.3	24938.1
BnaA01g09950D	0.1	0.01	0.01	0	2.33	0.33	0.33	0	0.08	0.13	0.08	0	0.04	0	0.04	0	0	0	0	0	2	3	2	0	1	0	1	0	0	0	0	0
BnaA01g09960D	0	0	0	0	0	0	0	0	0	0	0	0	0	0	0	0	0	0	0	0	0	0	0	0	0	0	0	0	0	0	0	0
BnaA01g09970D	12.99	10.66	10.37	11.83	586.86	529.3	520.54	650.01	13.5	12.91	12.57	8.41	13.02	10.55	11.43	9.52	10.16	12.33	10.54	12.61	656.08	542.37	562.14	352.4	671.17	564.32	565.24	444.76	551.62	738.93	569.2	641.9
BnaA01g09980D	5.4	0.2	4.78	1.4	63.67	2.33	63.33	19.67	5.29	4.38	6.52	0.46	0.07	0.07	4.89	3.37	6.08	1.28	0.36	2.56	67	48	76	5	1	1	63	41	86	20	5	34
BnaA01g09990D	8.69	4.07	8.37	4.89	187.49	96.23	201.01	128.02	7.94	10.65	7.47	4.05	3.37	4.78	7.42	10.02	7.66	3.86	5.19	5.61	185.85	215.68	160.94	81.8	83.73	123.15	176.84	225.7	200.49	111.47	134.98	137.61
BnaA01g10000D	19.91	2.59	19.54	4.41	515.47	73.3	566.56	138.39	21.81	17.67	20.24	2.23	2.67	2.88	13.17	19.03	26.43	4.38	4.36	4.49	605.32	424.19	516.89	53.44	78.54	87.93	371.79	507.89	819.99	150.02	134.56	130.58
BnaA01g10010D	0	0	0	0	0	0	0	0	0	0	0	0	0	0	0	0	0	0	0	0	0	0	0	0	0	0	0	0	0	0	0	0
BnaA01g10020D	0.37	0.96	1.07	0.7	10.78	31.89	34.99	25.03	0.26	0.62	0.24	0.51	1.03	1.35	1.39	0.88	0.93	0.61	0.52	0.98	8.35	17	7	14	34.53	47.14	45	26.96	33	24	18.4	32.7
BnaA01g10030D	0.2	0.25	0.27	0.38	4.67	6.67	7	10.67	0.2	0.23	0.17	0.05	0.52	0.18	0.54	0.12	0.14	0.35	0.36	0.42	5	5	4	1	14	5	14	3	4	11	10	11
BnaA01g10040D	1.83	0.17	1.48	0.22	135.38	14.44	123.04	20.17	1.67	2.29	1.53	0.1	0.14	0.27	1.64	1.4	1.41	0.2	0.32	0.14	134.18	158.97	113	7	12	24.31	134.28	108.19	126.64	20.17	28.24	12.11
BnaA01g10050D	5.05	3.6	4.58	4	285.85	222.45	287.73	277.14	4.78	4.87	5.49	3.38	4.18	3.25	4.75	4.87	4.13	4.28	3.99	3.73	291.8	257.04	308.72	178.06	270.73	218.55	295	286.18	282	322.38	270.6	238.43
BnaA01g10060D	2.74	0.11	2.53	0.41	57.33	2.67	59	10.67	2.58	2.11	3.53	0.1	0.08	0.16	2.84	1.99	2.75	0.61	0.24	0.38	58	41	73	2.02	2	4	65	43	69	17	6	9
BnaA01g10070D	0.68	0.03	0.99	0.08	14	0.67	22.33	2	0.92	0.37	0.75	0	0.09	0	1.22	0.81	0.94	0.15	0.08	0	20	7	15	0	2	0	27	17	23	4	2	0
BnaA01g10080D	0	0	0	0	0	0	0	0	0	0	0	0	0	0	0	0	0	0	0	0	0	0	0	0	0	0	0	0	0	0	0	0
BnaA01g10090D	0.2	0.02	0.18	0	3	0.33	3	0	0.25	0.15	0.21	0.07	0	0	0.13	0	0.4	0	0	0	4	2	3	1	0	0	2	0	7	0	0	0
BnaA01g10100D	8.17	14.03	9.76	14.66	562.97	1047.33	746.76	1232.44	8.66	8.31	7.53	14.42	13.78	13.9	8.96	10.41	9.91	15.13	15.11	13.75	642	532.92	514	922.57	1084.52	1134.91	676.51	742.44	821.32	1383.71	1245.39	1068.23
BnaA01g10110D	24.34	25.19	23.85	28.75	321	361.33	349.67	460.67	24.11	22.26	26.66	23.79	27.57	24.21	22.38	24.19	24.98	28.31	29.12	28.81	342	273	348	291	415	378	323	330	396	495	459	428
BnaA01g10120D	0	0	0	0	0	0	0	0	0	0	0	0	0	0	0	0	0	0	0	0	0	0	0	0	0	0	0	0	0	0	0	0
BnaA01g10130D	0.32	0.05	0.15	0.12	3.67	0.67	2	1.67	0.4	0.55	0	0.09	0	0.07	0	0.25	0.21	0.13	0.14	0.08	5	6	0	1	0	1	0	3	3	2	2	1
BnaA01g10140D	2.49	3.22	1.84	2.07	26	36.33	21	26	2.86	2.17	2.43	3.22	2.7	3.74	2.02	2.14	1.36	1.67	2.49	2.05	32	21	25	31	32	46	23	23	17	23	31	24
BnaA01g10150D	0	0	0	0.02	0	0	0	0.33	0	0	0	0	0	0	0	0	0	0.05	0	0	0	0	0	0	0	0	0	0	0	1	0	0
BnaA01g10160D	9.06	5.57	8.65	7.02	139.52	92.67	149	132.33	8.19	8.22	10.77	6.07	5.16	5.47	6.27	9.39	10.29	7.52	6.93	6.61	136	118	164.56	87	91	100	106	150	191	154	128	115
BnaA01g10170D	0.2	0.22	0	0.13	2.67	3	0	2	0.43	0.08	0.08	0.25	0.41	0	0	0	0	0.12	0.26	0	6	1	1	3	6	0	0	0	0	2	4	0
BnaA01g10180D	0	0	0	0	0	0	0	0	0	0	0	0	0	0	0	0	0	0	0	0	0	0	0	0	0	0	0	0	0	0	0	0
BnaA01g10190D	0	0	0	0	0	0	0	0	0	0	0	0	0	0	0	0	0	0	0	0	0	0	0	0	0	0	0	0	0	0	0	0
BnaA01g10200D	0.83	0.18	0.91	0.25	23.67	5.33	29.33	9	0.55	1.08	0.87	0.33	0.15	0.06	1.07	0.7	0.95	0.31	0.38	0.06	17	29	25	9	5	2	34	21	33	12	13	2
BnaA01g10210D	0.02	0.03	0	0.04	0.67	1	0	1.67	0	0.03	0.03	0.03	0.05	0	0	0	0	0.04	0.02	0.05	0	1	1	1	2	0	0	0	0	2	1	2
BnaA01g10220D	11.46	3.11	13	4.64	413.35	123.8	520.95	202.47	11.98	10.68	11.71	2.38	3.22	3.74	12.96	12.73	13.31	4.08	4.92	4.93	464.45	357.92	417.67	79.53	132.25	159.62	511.26	474.7	576.89	195.2	211.9	200.31
BnaA01g10230D	6.33	5.85	6.45	4.18	201.48	204.61	228.33	161.81	6.81	6.14	6.03	4.56	7.29	5.69	5.89	6.59	6.88	4.22	4.43	3.88	233	181.71	189.74	134.53	264.9	214.39	205	217	263	178	168.44	139
BnaA01g10240D	0	0	0	0	0	0	0	0	0	0	0	0	0	0	0	0	0	0	0	0	0	0	0	0	0	0	0	0	0	0	0	0
BnaA01g10250D	1.09	0.38	0.69	0.2	14.43	5.56	10.36	3.23	1.11	0.97	1.19	0.29	0.57	0.29	0.6	0.51	0.97	0.12	0.19	0.3	15.83	11.92	15.55	3.52	8.58	4.58	8.63	6.99	15.46	2.16	3.08	4.44
BnaA01g10260D	0.09	0.15	0.23	0.07	1	2	3	1	0	0	0.26	0	0.08	0.36	0.63	0	0.07	0	0.07	0.15	0	0	3	0	1	5	8	0	1	0	1	2
BnaA01g10270D	12.96	9.46	15.96	6.37	413.62	332.37	568.06	246.59	13.36	11.04	14.49	7.06	10.79	10.52	14.04	15.03	18.82	6.54	6.03	6.53	457.49	326.77	456.59	208.6	391.97	396.55	489	495	720.17	276	229.55	234.22
BnaA01g10280D	12.6	5.52	12.02	4.39	1121.74	536.77	1188.89	476.64	11.82	13.79	12.2	5.3	5.6	5.65	11.44	13.37	11.24	3.77	5.64	3.77	1137.64	1147.12	1080.46	440.07	572.07	598.16	1120.12	1237.53	1209.03	446.95	602.7	380.28
BnaA01g10290D	0.43	0.28	0.19	0.24	10.33	7.33	5	7	0.55	0.32	0.43	0.14	0.45	0.25	0.15	0.2	0.21	0.29	0.25	0.19	14	7	10	3	12	7	4	5	6	9	7	5
BnaA01g10300D	0.17	0.21	0.37	0.04	1.33	1.67	3.33	0.33	0.37	0.14	0	0.29	0.35	0	0.24	0	0.88	0	0	0.12	3	1	0	2	3	0	2	0	8	0	0	1
BnaA01g10310D	0.8	8.6	0.39	11.14	30.56	356.61	17.09	530.28	0.58	1	0.83	9.6	10.28	5.91	0.42	0.27	0.48	13.98	9.62	9.82	24	36	31.69	344.77	454.24	270.81	18	11	22.28	717.48	444.99	428.36
BnaA01g10320D	0.04	0.11	0	0.09	0.75	2	0	2	0.05	0.08	0	0.12	0.2	0	0	0	0	0.17	0	0.1	1	1.25	0	2	4	0	0	0	0	4	0	2
BnaA01g10330D	0.29	0	0.04	0	2	0	0.33	0	0.27	0.16	0.44	0	0	0	0	0	0.12	0	0	0	2	1	3	0	0	0	0	0	1	0	0	0
BnaA01g10340D	3.69	1.14	4.58	1.52	60.33	20.33	82.67	30.67	3.99	3.69	3.4	0.99	1.13	1.29	4.09	5.21	4.43	1.85	1.95	0.76	70	56	55	15	21	25	73	88	87	40	38	14
BnaA01g10350D	0.06	0	0	0.09	0.67	0	0	1	0.19	0	0	0	0	0	0	0	0	0	0	0.27	2	0	0	0	0	0	0	0	0	0	0	3
BnaA01g10360D	7.03	4	6.52	1.55	170.26	107.85	174.46	45.71	7.43	6.19	7.47	2.16	6.07	3.77	5.65	7.52	6.4	1.72	1.39	1.55	193.11	139.16	178.5	48.32	167.3	107.94	149.43	187.98	185.96	55	40.06	42.06
BnaA01g10370D	23.74	20.8	26.05	18.88	202.11	189.85	244.33	195.33	23.68	22.63	24.9	24.25	19.23	18.92	27.77	29.38	20.99	19.47	15.61	21.56	217	179.34	210	191.68	187	190.87	259	259	215	220	159	207
BnaA01g10380D	0	0	0	0.03	0	0	0	1	0	0	0	0	0	0	0	0	0	0.03	0.07	0	0	0	0	0	0	0	0	0	0	1	2	0
BnaA01g10390D	0.04	0.02	0.09	0.15	1	0.67	2.33	4.33	0	0	0.13	0.04	0	0.03	0.19	0	0.07	0.09	0.35	0	0	0	3	1	0	1	5	0	2	3	10	0
BnaA01g10400D	0.57	0.29	0.77	0.27	30.33	16.67	45.33	17.33	0.55	0.66	0.49	0.28	0.36	0.22	0.77	0.92	0.62	0.21	0.34	0.25	32	33	26	14	22	14	45	51	40	15	22	15
BnaA01g10410D	1.79	0.17	0.89	0.51	58	5.93	31.74	19.74	1.84	1.43	2.09	0.23	0.14	0.15	1.13	0.93	0.62	0.4	0.39	0.73	64	43	67	7	5	5.8	40.17	31.04	24	17.32	15.22	26.69
BnaA01g10420D	5.76	4.55	3.04	2.13	194.23	160.6	113.83	88.57	7.36	6.75	3.16	6.33	4.8	2.51	2.13	3.43	3.55	2.87	1.86	1.66	266.28	211.16	105.26	197.67	184.29	99.85	78.51	119.53	143.45	128	74.7	63
BnaA01g10430D	0.01	0	0	0	0.33	0	0	0	0	0.02	0	0	0	0	0	0	0	0	0	0	0	1	0	0	0	0	0	0	0	0	0	0
BnaA01g10440D	0.21	0	0.1	0.05	5.67	0	3	1.67	0.25	0.12	0.27	0	0	0	0	0	0.29	0.09	0.06	0	7	3	7	0	0	0	0	0	9	3	2	0
BnaA01g10450D	0	0.01	0	0	0	0.67	0	0	0	0	0	0	0.02	0.02	0	0	0	0	0	0	0	0	0	0	1	1	0	0	0	0	0	0
BnaA01g10460D	9	7.35	7.21	6.11	256.42	217.8	228.03	212.08	8.83	9.11	9.07	11.72	4.63	5.69	7.87	7.05	6.7	6.39	5.13	6.82	271	242	256.27	310.27	150.94	192.2	246	208.08	230	241.9	175	219.34
BnaA01g10470D	0.2	0.39	0.28	0.53	3.67	7.67	5.67	12	0.1	0.35	0.16	0.52	0.28	0.36	0.39	0.26	0.18	0.57	0.54	0.48	2	6	3	9	6	8	8	5	4	14	12	10
BnaA01g10480D	1.22	0.36	1.63	0.74	34	11	49.33	24	2.07	0.48	1.12	0.16	0.2	0.72	1.09	1.58	2.22	0.36	1.49	0.36	60	12	30	4	6	23	32	44	72	13	48	11
BnaA01g10490D	14.36	6.72	8.91	4.54	229.86	114.18	159.08	89.48	13.54	13.97	15.58	8.9	5.18	6.07	9.93	7.79	9	5.99	2.94	4.68	233.66	208.46	247.45	132.41	94.87	115.27	174.34	129.33	173.58	127.36	56.48	84.59
BnaA01g10500D	7.1	4.96	5.82	3.84	185.68	142.44	168.87	124.16	7.78	7.34	6.18	4.06	5.26	5.56	6.07	5.61	5.77	5.23	3.42	2.87	218.61	178.47	159.96	98.32	156.93	172.07	173.52	151.77	181.31	181.31	106.72	84.45
BnaA01g10510D	1.74	1.47	1.96	0.91	51.33	46.67	64.22	32.39	1.73	1.71	1.78	1.5	1.55	1.35	2.08	1.92	1.89	0.75	0.96	1.02	55	47	52	41	52	47	67	58.67	67	29.16	34	34
BnaA01g10520D	17.68	6.43	15.51	8.16	220.94	89.3	218.86	125.28	17.52	14.3	21.22	3.71	9.76	5.82	12.45	11.76	22.33	11.06	5.16	8.26	235	165.86	261.96	42.91	139	86	169.98	151.71	334.89	182.94	76.89	116
BnaA01g10530D	7.63	28.67	10.11	42.44	283.71	1165.28	420.73	1925.96	7.54	8.89	6.47	26.33	34.76	24.91	7.51	11.07	11.74	39.83	47.59	39.91	302.89	308.97	239.27	912.29	1481.92	1101.62	307.06	427.86	527.27	1972.94	2125.23	1679.72
BnaA01g10540D	0.59	0.09	0.22	0.11	18.74	3.33	7.75	4.05	0.65	0.54	0.58	0.03	0.22	0.03	0.06	0.25	0.34	0.07	0.16	0.09	22.22	16	18	1	8	1	2	8.24	13	3	6	3.15
BnaA01g10550D	37.86	10.88	35.88	12.54	661.06	207.14	699.42	265.72	35.05	37.47	41.07	10.85	8.68	13.1	35.3	34.84	37.51	10.13	15.96	11.53	660.48	610.63	712.08	176.24	173.54	271.64	676.74	631.53	790	235.37	334.21	227.57
BnaA01g10560D	0	0	0	0	0	0	0	0	0	0	0	0	0	0	0	0	0	0	0	0	0	0	0	0	0	0	0	0	0	0	0	0
BnaA01g10570D	0.94	0.21	1.3	0.19	10.67	2.67	16.33	2.67	0.74	0.85	1.24	0.09	0.39	0.15	1.04	1.7	1.17	0.27	0.07	0.23	9	9	14	1	5	2	13	20	16	4	1	3
BnaA01g10580D	12.34	6.17	10.76	11.42	195.67	107	190.33	221.67	11.15	12.42	13.44	5.28	9.46	3.76	9.23	11.77	11.28	11.45	12.5	10.31	191	184	212	78	172	71	161	194	216	242	238	185
BnaA01g10590D	6.87	4.13	6.28	2.69	386.3	252.53	392.98	184.38	6.71	7.02	6.88	4.16	4.08	4.16	6.22	6.4	6.23	2.53	3.31	2.22	407	367.93	383.96	217.55	262.51	277.52	383.79	373	422.16	189.4	223	140.74
BnaA01g10600D	20.44	16.2	20.72	15.33	388.06	333.98	440.37	356.79	20.28	21.94	19.11	16.13	18.96	13.52	18.06	20.22	23.87	17.18	14.06	14.75	415.38	388.71	360.09	284.92	412.19	304.84	376.39	398.31	546.41	433.93	320.06	316.38
BnaA01g10610D	0.02	0	0	0	0.33	0	0	0	0	0	0.07	0	0	0	0	0	0	0	0	0	0	0	1	0	0	0	0	0	0	0	0	0
BnaA01g10620D	0.22	0.11	0.24	0.09	10.04	5	11.48	4.67	0.27	0.13	0.27	0.15	0.02	0.15	0.27	0.29	0.16	0.07	0.13	0.06	13	5.37	11.76	6	1	8	13	13	8.45	4	7	3
BnaA01g10630D	9.5	4.57	7.94	4.13	270.2	142.68	249.2	141.94	10.39	8.76	9.36	3.5	5.44	4.77	7.01	9.17	7.65	3.7	4.99	3.69	316.79	231	262.8	92	176	160.03	217.66	269	260.95	139	169	117.82
BnaA01g10640D	0	0	0	0	0	0	0	0	0	0	0	0	0	0	0	0	0	0	0	0	0	0	0	0	0	0	0	0	0	0	0	0
BnaA01g10650D	6.39	6.25	3.55	6	170.4	182.64	105.05	195.42	6.93	7.03	5.2	5.34	7.86	5.56	3.35	3.85	3.44	6.48	5.38	6.13	199.04	174.72	137.45	132.26	239.66	176	97.98	106.52	110.64	229.6	172	184.66
BnaA01g10660D	0.41	1.12	0.3	0.88	14	42.33	11.33	37.33	0.46	0.44	0.32	1	1.04	1.32	0.24	0.45	0.22	0.92	1.06	0.67	17	14	11	32	41	54	9	16	9	42	44	26
BnaA01g10670D	4.64	2.44	2.76	2.93	66.96	38.04	43.75	50.73	4.12	4.19	5.62	2.79	1.85	2.69	2.46	3.71	2.11	2.06	2.98	3.75	64.11	56.34	80.44	37.43	30.63	46.06	38.96	55.61	36.68	39.54	51.49	61.15
BnaA01g10680D	0.2	0.08	0.29	0.1	4.67	2	7.33	2.67	0.2	0.23	0.18	0.09	0.11	0.04	0.28	0.42	0.18	0.03	0.18	0.08	5	5	4	2	3	1	7	10	5	1	5	2
BnaA01g10690D	3.07	1.07	0.33	0.54	94.73	35.31	11.82	20.67	2.8	4.14	2.27	1.52	0.62	1.08	0.35	0.17	0.48	0.58	0.54	0.51	94	120.21	69.98	43.93	22	40	12	5.4	18.05	24	20	18
BnaA01g10700D	0	0	0	0	0	0	0	0	0	0	0	0	0	0	0	0	0	0	0	0	0	0	0	0	0	0	0	0	0	0	0	0
BnaA01g10710D	0	0	0	0	0	0	0	0	0	0	0	0	0	0	0	0	0	0	0	0	0	0	0	0	0	0	0	0	0	0	0	0
BnaA01g10720D	0	0	0	0	0	0	0	0	0	0	0	0	0	0	0	0	0	0	0	0	0	0	0	0	0	0	0	0	0	0	0	0
BnaA01g10730D	0.6	0.19	0.46	0.12	13.39	4.6	11.72	3.21	0.59	0.8	0.4	0.16	0.21	0.19	0.41	0.34	0.63	0.11	0.19	0.05	14.3	16.9	8.98	3.34	5.34	5.13	10.13	7.98	17.06	3.19	5.27	1.18
BnaA01g10740D	1.18	0.25	0.72	0.34	30.97	7	21.69	10.67	1.03	0.74	1.77	0.29	0.07	0.39	0.28	0.56	1.33	0.17	0.51	0.34	29	18	45.91	7	2	12	8	15.07	42	6	16	10
BnaA01g10750D	63.94	59.78	18.28	111.82	1721.62	1712.33	554.09	3670.22	59.16	71.64	61.03	80.45	48.11	50.77	3.38	25.14	26.33	100.56	123.4	111.49	1723.5	1805.08	1636.28	2021.52	1487.33	1628.15	100.28	704.56	857.44	3612.15	3996.21	3402.3
BnaA01g10760D	10.17	5.33	9.9	6.55	723.49	415.73	781.76	570.04	9.46	9.63	11.43	4.71	5.28	6	8.96	10.83	9.9	6.59	7.94	5.12	725.11	638.71	806.64	311.17	429.63	506.38	698.72	798.39	848.17	622.52	676.23	411.36
BnaA01g10770D	0.23	0	0.02	0.17	2.85	0	0.22	2.67	0.09	0.3	0.29	0	0	0	0	0.05	0	0.31	0	0.19	1.29	3.56	3.71	0	0	0	0	0.67	0	5.25	0	2.77
BnaA01g10780D	10.31	4.08	7.18	4.74	286.37	122.73	219.64	158.48	10.39	9.21	11.33	4.19	3.13	4.91	8.26	7.53	5.74	3.7	5.27	5.26	310.14	237.84	311.14	107.84	99	161.34	250.93	216.35	191.65	136.23	174.81	164.41
BnaA01g10790D	6.19	12.95	5.34	13.21	118.14	265.76	113.16	305.14	6.47	6.15	5.94	14.89	10.05	13.92	4.57	5.92	5.53	12.64	11.66	15.32	132.91	109.24	112.26	263.67	219	314.6	95.51	117	126.96	320	266	329.41
BnaA01g10800D	15.09	22.48	14.23	25.06	374.3	605.74	390.13	756.02	15.23	13.89	16.14	22.76	17.61	27.07	14.86	15.19	12.65	24.17	27.77	23.25	406.22	320.4	396.29	523.71	498.52	795	403.45	389.7	377.23	794.96	823.44	649.66
BnaA01g10810D	1.2	0.27	1.07	0.35	57.28	14.33	56.24	20.01	1.25	0.79	1.55	0.25	0.22	0.35	1.17	1.25	0.8	0.33	0.32	0.39	63.83	35	73	11	12	20	61	61.71	46	21	18.04	21
BnaA01g10820D	0	1.1	0.01	3.77	0	37.2	0.33	147.04	0	0	0	1.51	0.75	1.05	0	0	0.03	4.37	2.62	4.33	0	0	0	44.64	27.26	39.71	0	0	1	185.02	100.11	156
BnaA01g10830D	0.1	0.02	0.15	0.06	4.67	1	7.43	3.38	0.08	0.12	0.11	0	0.02	0.04	0.12	0.2	0.14	0.03	0.09	0.06	4	5	5	0	1	2	6.01	9	7.29	2	5	3.13
BnaA01g10840D	1.25	0.34	1.34	0.14	65.49	20.33	78.33	9	0.97	1.02	1.75	0.22	0.35	0.46	1.48	1.39	1.15	0.07	0.22	0.13	55	50	91.46	11	21	29	86	76	73	5	14	8
BnaA01g10850D	0	0	0	0	0	0	0	0	0	0	0	0	0	0	0	0	0	0	0	0	0	0	0	0	0	0	0	0	0	0	0	0
BnaA01g10860D	0	0	0	0	0	0	0	0	0	0	0	0	0	0	0	0	0	0	0	0	0	0	0	0	0	0	0	0	0	0	0	0
BnaA01g10870D	0	0	0	0	0	0	0	0	0	0	0	0	0	0	0	0	0	0	0	0	0	0	0	0	0	0	0	0	0	0	0	0
BnaA01g10880D	0.02	2.77	0	0.73	0.33	50.33	0	15.33	0	0.06	0	2.7	3.34	2.27	0	0	0	1.3	0.3	0.58	0	1	0	42	64	45	0	0	0	29	6	11
BnaA01g10890D	0	0	0	0	0	0	0	0	0	0	0	0	0	0	0	0	0	0	0	0	0	0	0	0	0	0	0	0	0	0	0	0
BnaA01g10900D	0	0	0	0	0	0	0	0	0	0	0	0	0	0	0	0	0	0	0	0	0	0	0	0	0	0	0	0	0	0	0	0
BnaA01g10910D	0	0	0	0	0	0	0	0	0	0	0	0	0	0	0	0	0	0	0	0	0	0	0	0	0	0	0	0	0	0	0	0
BnaA01g10920D	0	0	0	0	0	0	0	0	0	0	0	0	0	0	0	0	0	0	0	0	0	0	0	0	0	0	0	0	0	0	0	0
BnaA01g10930D	0.03	0	0	0	0.33	0	0	0	0	0	0.09	0	0	0	0	0	0	0	0	0	0	0	1	0	0	0	0	0	0	0	0	0
BnaA01g10940D	1.54	3.61	0.44	2	7	16.75	2.37	11.03	0.4	1.16	3.06	7.47	0.76	2.61	0.4	0	0.92	1.69	0.92	3.4	2	5	14	32	4	14.26	2	0	5.1	10.34	5.06	17.69
BnaA01g10950D	0	0	0	0	0	0	0	0	0	0	0	0	0	0	0	0	0	0	0	0	0	0	0	0	0	0	0	0	0	0	0	0
BnaA01g10960D	1.49	0.51	0.99	0.4	51.99	19.76	39.03	17.13	1.07	1.72	1.69	0.43	0.62	0.48	1.01	0.85	1.11	0.32	0.46	0.43	40.56	56.42	59	14	25	20.29	39	30.94	47.15	15	19.4	17
BnaA01g10970D	0.71	0.21	0.73	0.28	19.97	6.33	22.67	9.67	0.73	0.68	0.72	0.27	0.19	0.18	0.65	0.82	0.71	0.32	0.3	0.22	22	17.92	20	7	6	6	20	24	24	12	10	7
BnaA01g10980D	0.05	0.03	0.08	0.02	2.33	1.67	4	1.33	0.11	0	0.05	0	0.04	0.06	0.04	0.04	0.15	0.03	0	0.04	5	0	2	0	2	3	2	2	8	2	0	2
BnaA01g10990D	4.18	2.23	3.21	1.92	66.33	38	57.33	37.33	4.31	5.25	2.97	2.77	1.37	2.54	4.23	2.18	3.23	2.03	1.52	2.22	74	78	47	41	25	48	74	36	62	43	29	40
BnaA01g11000D	5.62	1.75	4.73	2.33	45.03	15.67	42.33	23	5.69	5.89	5.28	1.21	1.53	2.52	3.53	5.18	5.49	2.91	2.08	1.99	49.1	44	42	9	14	24	31	43	53	31	20	18
BnaA01g11010D	0.47	0.01	0.06	0.01	11.43	0.33	1.68	0.33	0.38	0.87	0.16	0.04	0	0	0	0.12	0.07	0.03	0	0	10.24	20.05	4	1	0	0	0	3	2.03	1	0	0
BnaA01g11020D	21.43	12.43	18.75	12.28	236.84	149.02	232.15	165.92	21.26	20.47	22.56	12.44	12.57	12.27	17.79	16.32	22.13	14.03	10.17	12.65	252.95	210.65	246.92	127.67	158.69	160.69	215.37	186.74	294.34	205.73	134.43	157.59
BnaA01g11030D	4.38	0.85	0.55	0.22	50	11	7	3.05	4.21	5.15	3.79	0.38	1.22	0.96	0.48	0.51	0.65	0.13	0.3	0.23	52	55	43	4	16	13	6	6	9	2	4.14	3
BnaA01g11040D	2.17	0.57	0.39	0.38	25.33	7.33	5.13	5.33	1.9	2.65	1.97	0.46	1.04	0.22	0.31	0.49	0.38	0.13	0.78	0.23	24	29	23	5	14	3	4	6	5.4	2	11	3
BnaA01g11050D	0	0	0	0	0	0	0	0	0	0	0	0	0	0	0	0	0	0	0	0	0	0	0	0	0	0	0	0	0	0	0	0
BnaA01g11060D	9.76	4.64	7.3	5.11	364.74	188.19	301.23	232.6	10.67	9.8	8.81	4.54	4.52	4.87	7.01	8.03	6.85	5.05	5.74	4.55	428.44	340.26	325.52	157.14	192.37	215.07	286.17	310.04	307.48	250.07	256.33	191.39
BnaA01g11070D	2.81	1.9	3.81	2.27	103.08	75.31	156.21	101.38	2.68	3.24	2.52	2.05	2.05	1.59	3.86	3.71	3.86	2.09	2.58	2.13	106.12	111.25	91.86	70.21	86.16	69.57	155.91	141.67	171.04	102	113.61	88.54
BnaA01g11080D	0.64	0.06	0.38	0.04	16.67	1.67	11	1.33	0.87	0.63	0.43	0.08	0.07	0.03	0.36	0.34	0.45	0	0.13	0	24	15	11	2	2	1	10	9	14	0	4	0
BnaA01g11090D	8.59	1.77	7.24	1.99	283.4	65.08	268.16	79.92	8.25	8.68	8.83	1.3	1.65	2.37	7.21	6.29	8.23	1.87	2.06	2.05	293.58	267.19	289.44	39.96	62.29	93	261.26	215.56	327.67	82	81.35	76.41
BnaA01g11100D	8.49	3.66	7.8	3.93	151	69.71	153	84.84	9.44	7.95	8.09	4.27	2.62	4.1	8.61	7.8	6.99	3.81	4.53	3.46	180	131	142	70.13	53	86	167	143	149	89.53	96	69
BnaA01g11110D	0	0	0	0	0	0	0	0	0	0	0	0	0	0	0	0	0	0	0	0	0	0	0	0	0	0	0	0	0	0	0	0
BnaA01g11120D	0	0	0.05	0.09	0	0	1	1.92	0	0	0	0	0	0	0	0	0.15	0.27	0	0	0	0	0	0	0	0	0	0	3	5.77	0	0
BnaA01g11130D	18.19	15.93	17.98	26.61	383.79	369	420.11	682.85	20.83	19.62	14.13	12.85	17.9	17.04	18.01	18.56	17.38	28.92	21.85	29.07	472.09	384.56	294.72	251.25	430.64	425.12	415.38	404.63	440.31	808.08	550.38	690.08
BnaA01g11140D	4.47	42.7	11.81	62.2	92.5	960.06	270.7	1577.2	4.59	5.74	3.07	46.44	35.56	46.1	11.57	14.18	9.68	64.02	59.56	63.02	102.86	111.3	63.35	897.49	845.54	1137.16	263.83	305.73	242.53	1768.71	1483.54	1479.36
BnaA01g11150D	0	0	0	0	0	0	0	0	0	0	0	0	0	0	0	0	0	0	0	0	0	0	0	0	0	0	0	0	0	0	0	0
BnaA01g11160D	0	0	0	0	0	0	0	0	0	0	0	0	0	0	0	0	0	0	0	0	0	0	0	0	0	0	0	0	0	0	0	0
BnaA01g11170D	0	0	0	0	0	0	0	0	0	0	0	0	0	0	0	0	0	0	0	0	0	0	0	0	0	0	0	0	0	0	0	0
BnaA01g11180D	0	0.01	0.01	0.04	0	0.33	0.33	1	0	0	0	0	0	0.04	0	0	0.04	0.04	0	0.09	0	0	0	0	0	1	0	0	1	1	0	2
BnaA01g11190D	158.47	32.35	145.25	37.18	2422.65	532.85	2454.59	683.03	155.98	131.2	188.23	36.17	21.42	39.46	157.69	145.96	132.09	28.36	42.41	40.76	2560.96	1863	2844	512.18	373.26	713.11	2634.26	2305.23	2424.29	574	774	701.08
BnaA01g11200D	0.41	0.07	0.43	0.06	11	2	12.67	2	0.24	0.36	0.64	0.04	0.07	0.1	0.51	0.33	0.44	0.03	0.13	0.03	7	9	17	1	2	3	15	9	14	1	4	1
BnaA01g11210D	1.36	0.72	0.95	1.12	11.05	6.41	8.33	11	1.96	1.49	0.63	0.64	0.54	0.99	0.57	1.44	0.83	1.22	0.94	1.21	17	11.15	5	4.78	5	9.44	5	12	8	13	9	11
BnaA01g11220D	0.86	2.54	0.66	3.02	36.61	115.85	30.96	156.97	0.78	0.91	0.9	2.7	3.02	1.89	0.69	0.71	0.59	3.38	3.17	2.5	35.81	36.02	38	106.15	146.2	95.2	32	31	29.89	190.36	160.76	119.78
BnaA01g11230D	20.36	1.08	3.03	0.19	664.73	39.4	112.53	7.33	19.02	23.12	18.94	0.45	2.41	0.37	0.89	3.38	4.83	0.11	0.13	0.32	671.98	706.38	615.83	13.67	90.23	14.3	32.14	114.77	190.67	5	5	12
BnaA01g11240D	0	0	0	0	0	0	0	0	0	0	0	0	0	0	0	0	0	0	0	0	0	0	0	0	0	0	0	0	0	0	0	0
BnaA01g11250D	0.32	0.07	0.1	0.09	9.67	2	3.67	3.33	0.21	0.52	0.23	0.14	0.03	0.03	0.06	0.09	0.16	0.05	0.11	0.11	7	15	7	4	1	1	2	3	6	2	4	4
BnaA01g11260D	0.15	0	0.03	0	1.33	0	0.33	0	0.1	0.34	0	0	0	0	0	0	0.09	0	0	0	1	3	0	0	0	0	0	0	1	0	0	0
BnaA01g11270D	1.46	0.73	0.95	0.97	72.41	40.17	52.55	57.86	1.57	1.33	1.47	0.47	0.87	0.85	0.85	1.03	0.98	0.67	1.13	1.12	84	61.22	72	21.42	49	50.09	46.16	53	58.5	44	67	62.57
BnaA01g11280D	5.87	12.15	3.15	15.64	98.5	219.68	59.35	322.12	5.59	6.92	5.09	13.87	14.24	8.35	3.96	2.31	3.17	17.59	11.99	17.33	101.57	108.72	85.22	217.4	274.62	167.03	73.32	40.37	64.37	394.31	242.16	329.9
BnaA01g11290D	3.52	0.45	3.14	0.19	37.33	5	37.67	2.33	2.61	3.22	4.73	0.71	0.25	0.4	1.63	3.44	4.36	0	0.23	0.33	30	32	50	7	3	5	19	38	56	0	3	4
BnaA01g11300D	0	0	0	0	0	0	0	0	0	0	0	0	0	0	0	0	0	0	0	0	0	0	0	0	0	0	0	0	0	0	0	0
BnaA01g11310D	42.63	16.44	40.5	14.27	830.81	352.13	884.23	340.27	41.17	47.31	39.4	14.31	17.96	17.04	39.5	37.86	44.14	14.72	13.99	14.1	867.13	861.7	763.61	259.88	401.4	395.1	846.53	767	1039.17	382.35	327.47	311
BnaA01g11320D	9.81	4.78	9.07	4.41	223.51	119.03	229.3	119.96	10.64	8.82	9.96	4.17	5.09	5.09	8.83	8.96	9.43	2.89	4.88	5.47	260.06	186.47	224	88	132.09	137	219.62	210.7	257.57	87.21	132.56	140.12
BnaA01g11330D	0.1	0.05	0.04	0.06	2.67	1.33	1	1.67	0.23	0.04	0.04	0.04	0.11	0	0.04	0.04	0.03	0.06	0.07	0.04	6	1	1	1	3	0	1	1	1	2	2	1
BnaA01g11340D	0.34	0.36	0.13	0.54	3.33	4	1.33	6.33	0.38	0.22	0.41	0.11	0.54	0.43	0.09	0.2	0.09	0.46	0.43	0.73	4	2	4	1	6	5	1	2	1	6	5	8
BnaA01g11350D	5.55	0.34	3.54	0.26	87.01	5.67	61.84	5	6.12	5.09	5.45	0.41	0.5	0.11	4.14	2.48	3.99	0.34	0.27	0.17	102.86	73.89	84.29	6	9	2	70.66	40	74.87	7	5	3
BnaA01g11360D	1.89	0.66	2.02	0.82	40.9	15.33	48.54	21.28	1.98	1.9	1.8	0.75	0.45	0.78	1.84	2.19	2.04	0.66	0.73	1.06	46	38.19	38.52	15	11	20	43.61	49	53	19	19	25.83
BnaA01g11370D	0.79	0.22	0.31	0.15	28.77	9.15	13.09	6.67	0.64	0.76	0.96	0.15	0.2	0.32	0.21	0.24	0.49	0.06	0.23	0.17	25.3	26	35	5.02	8.43	14	8.27	9.28	21.71	3	10	7
BnaA01g11380D	1.03	0.1	0.8	0.07	35.23	3.98	30.1	3.04	0.72	0.84	1.53	0.06	0.18	0.07	0.69	1.1	0.61	0.02	0.15	0.05	26.7	27	52	2	7	2.94	25.93	39.13	25.25	1	6.11	2
BnaA01g11390D	13.44	25.72	11.38	38.34	292.33	596.72	277	1019.33	13.04	13.99	13.29	32.47	23.01	21.68	8.46	12.31	13.38	41.4	33.35	40.27	306	284	287	657.16	573	560	202	278	351	1198	870	990
BnaA01g11400D	25.15	40.43	13.05	40.85	629.06	1106.69	367.65	1260.74	18.91	26.77	29.77	40.32	43.49	37.48	10.09	13.88	15.19	45.95	36.19	40.4	513.84	629.08	744.25	944.89	1254.14	1121.04	279.03	362.65	461.26	1539.27	1093.08	1149.87
BnaA01g11410D	0.03	0.19	0.13	0.59	0.67	4	2.67	13.67	0.1	0	0	0.06	0.37	0.14	0.05	0.21	0.13	0.72	0.49	0.57	2	0	0	1	8	3	1	4	3	18	11	12
BnaA01g11420D	20.94	12.47	10.95	14.99	535.1	352.51	312.11	466.37	18.62	16.19	28	9.28	12.68	15.45	7.63	12.27	12.96	15.15	15.03	14.8	512.03	384.93	708.35	220.01	369.89	467.63	213.49	324.59	398.24	513.53	459.22	426.36
BnaA01g11430D	6.45	10.64	11.98	6.06	83.98	150.65	174.85	97.02	6.23	7.18	5.93	10.56	12.79	8.56	7.78	13.69	14.46	6.86	5.74	5.57	87.68	87.46	76.79	128.18	191.1	132.66	111.39	185.49	227.66	119.12	89.76	82.18
BnaA01g11440D	4.91	3.25	1.9	0.67	33.67	23	15	5.67	4.3	5.75	4.67	5.77	2.28	1.71	1.72	0.98	3.01	0.65	0.6	0.77	32	37	32	37	18	14	13	7	25	6	5	6
BnaA01g11450D	0.98	0.08	0.67	0.02	15.67	1.33	11.67	0.33	1.11	1.08	0.76	0.13	0	0.11	0.74	0.79	0.47	0.05	0	0	19	16	12	2	0	2	13	13	9	1	0	0
BnaA01g11460D	0	0	0	0	0	0	0	0	0	0	0	0	0	0	0	0	0	0	0	0	0	0	0	0	0	0	0	0	0	0	0	0
BnaA01g11470D	0	0	0	0	0	0	0	0	0	0	0	0	0	0	0	0	0	0	0	0	0	0	0	0	0	0	0	0	0	0	0	0
BnaA01g11480D	0	0	0	0	0	0	0	0	0	0	0	0	0	0	0	0	0	0	0	0	0	0	0	0	0	0	0	0	0	0	0	0
BnaA01g11490D	4.06	3.4	4.74	4.75	128.3	116.93	166.66	183.15	4.02	3.94	4.23	3.19	3.67	3.34	3.74	5.18	5.3	4.89	5.12	4.25	136.75	115.73	132.41	93.42	132.43	124.94	129.35	169.46	201.18	204.73	193.43	151.3
BnaA01g11500D	0.01	0.06	0.01	0.01	0.67	3	0.33	0.33	0.02	0	0.02	0	0.17	0.02	0	0.02	0	0	0.02	0	1	0	1	0	8	1	0	1	0	0	1	0
BnaA01g11510D	0.07	0.03	0.02	0	2.28	1	0.67	0	0	0.16	0.06	0	0.03	0.05	0.06	0	0	0	0	0	0	4.83	2	0	1	2	2	0	0	0	0	0
BnaA01g11520D	3.06	1.55	2.08	1.15	139.39	75.65	105.3	64.68	3.1	2.4	3.69	1.73	1.44	1.47	1.66	2.18	2.4	1.59	0.93	0.94	151.34	101.14	165.69	73	74.8	79.15	82.67	102.47	130.77	95.54	50.5	48
BnaA01g11530D	18.69	12.87	17.73	10.67	1110.9	834.45	1170.33	775.76	18.28	18.51	19.29	12.23	12.96	13.43	15.27	19.78	18.13	11.22	11.56	9.23	1170.6	1025.33	1136.77	675.54	880.89	946.93	994.75	1218.66	1297.57	885.51	822.92	618.85
BnaA01g11540D	1.31	0.47	1.31	0.24	15.34	6	16.94	3.44	1.16	0.8	1.98	0.46	0.38	0.58	1.17	1.33	1.42	0.13	0.5	0.1	14.51	8.64	22.88	5	5	8	14.9	16	19.92	2	7	1.33
BnaA01g11550D	3.19	1.87	1.98	2.75	21.67	13.33	15	22.67	2.75	1.75	5.08	2.55	1.3	1.75	1.49	1.86	2.58	2.57	3.46	2.23	20	11	34	16	10	14	11	13	21	23	28	17
BnaA01g11560D	0	0	0	0	0	0	0	0	0	0	0	0	0	0	0	0	0	0	0	0	0	0	0	0	0	0	0	0	0	0	0	0
BnaA01g11570D	0	0	0	0	0	0	0	0	0	0	0	0	0	0	0	0	0	0	0	0	0	0	0	0	0	0	0	0	0	0	0	0
BnaA01g11580D	2.88	0.44	2.64	0.26	102.17	17.59	102.65	10.91	3.15	3.48	2.02	0.27	0.32	0.73	3.14	3.01	1.76	0.17	0.26	0.34	120.52	114.96	71.04	9	13	30.76	122.09	110.75	75.11	8	11	13.72
BnaA01g11590D	0	0	0	0	0	0	0	0	0	0	0	0	0	0	0	0	0	0	0	0	0	0	0	0	0	0	0	0	0	0	0	0
BnaA01g11600D	3.8	1.66	3.37	1.99	100.12	47.8	99	63.01	4.19	3.43	3.78	1.44	1.63	1.91	3.66	2.72	3.74	1.72	2	2.24	118.48	83.73	98.15	35	49	59.4	105.09	73.91	118	59.93	62.92	66.18
BnaA01g11610D	0.25	0	0.06	0	1.33	0	0.33	0	0	0.19	0.55	0	0	0	0.17	0	0	0	0	0	0	1	3	0	0	0	1	0	0	0	0	0
BnaA01g11620D	10.39	5.63	7.83	4.71	194.97	116.1	162.22	106.67	8.96	8.57	13.64	4.93	5.17	6.8	7.52	9.25	6.72	3.81	4.79	5.54	181.24	149.84	253.83	85.97	111	151.33	154.67	180	152	95	107.72	117.29
BnaA01g11630D	10.56	8.15	9.13	6.36	288.68	235.96	276.85	211.14	13.21	8.9	9.56	9.78	7.5	7.16	7.62	8.76	11.02	7.37	6.02	5.69	385	224.5	256.55	246	232	229.88	226	245.54	359	264.82	195	173.6
BnaA01g11640D	15.24	5.69	16.16	4.61	216.33	89	254.76	80.26	16.58	15.61	13.53	4.33	6.3	6.43	17.62	15.03	15.84	5.58	3.89	4.37	253	206	190	57	102	108	273.6	220.57	270.12	105	66	69.79
BnaA01g11650D	0.14	0.08	0.19	0.08	8.63	5.87	12.14	5.46	0.08	0.12	0.23	0.05	0.04	0.16	0.17	0.3	0.09	0.02	0.14	0.07	5	7	13.9	3	3	11.61	11	19	6.41	1.38	10	5
BnaA01g11660D	15.07	9.72	17.96	10.23	204.61	144	270.33	167.67	15.38	14.02	15.82	9.06	8.52	11.58	18.99	17.6	17.29	8.56	11.78	10.34	224.46	177	212.38	114	132	186	282	247	282	154	191	158
BnaA01g11670D	2.69	0.85	5.83	1.86	38.33	13.33	94.33	32.33	2.41	2.48	3.18	0.75	0.92	0.89	5.05	4.19	8.26	1.53	2.87	1.18	37	33	45	10	15	15	79	62	142	29	49	19
BnaA01g11680D	0.7	0.59	0.73	0.61	27.72	25.67	32.67	30	0.89	0.81	0.39	0.46	0.68	0.62	0.78	0.56	0.86	0.78	0.59	0.47	38	30	15.17	17	31	29	34	23	41	41	28	21
BnaA01g11690D	0.14	0.03	0.23	0.11	6.51	1.67	11.54	6.09	0.14	0.17	0.12	0.02	0	0.07	0.15	0.34	0.19	0.12	0.11	0.1	7	7.14	5.39	1	0	4	7.77	16.25	10.61	7.42	5.84	5
BnaA01g11700D	1.67	0.33	0.86	0.24	22.67	5	12.33	4	3.21	0.49	1.32	0	0.81	0.19	0.14	1.41	1.02	0.58	0	0.14	45	6	17	0	12	3	2	19	16	10	0	2
BnaA01g11710D	0	0.1	0	0	0	1.33	0	0	0	0	0	0.17	0.14	0	0	0	0	0	0	0	0	0	0	2	2	0	0	0	0	0	0	0
BnaA01g11720D	0	0	0	0	0	0	0	0	0	0	0	0	0	0	0	0	0	0	0	0	0	0	0	0	0	0	0	0	0	0	0	0
BnaA01g11730D	0.07	0	0.02	0	1	0	0.33	0	0	0	0.22	0	0	0	0	0	0.06	0	0	0	0	0	3	0	0	0	0	0	1	0	0	0
BnaA01g11740D	0.59	0.66	0.36	0.67	17	21.14	11.43	23.48	0.65	0.53	0.6	0.31	0.74	0.92	0.22	0.41	0.44	0.71	0.74	0.56	20	14	17	8.2	24.21	31	7	12.15	15.15	27	25.43	18
BnaA01g11750D	0	0	0	0	0	0	0	0	0	0	0	0	0	0	0	0	0	0	0	0	0	0	0	0	0	0	0	0	0	0	0	0
BnaA01g11760D	3.7	54.93	4.9	12.4	92.33	1535.67	136.33	384	4.64	3.85	2.6	17.69	124.45	22.66	3.16	5.33	6.22	19.47	7.7	10.03	124	89	64	408	3532	667	86	137	186	642	229	281
BnaA01g11770D	2.37	5.62	2.41	5.94	19.67	49.33	22.33	60.33	2.69	2.21	2.2	7.29	4.87	4.69	1.43	2.68	3.11	6.92	5.55	5.36	24	17	18	56	46	46	13	23	31	76	55	50
BnaA01g11780D	1.39	1.48	1.7	0.73	43.21	50.49	58.96	28.05	2.03	0.76	1.39	0.66	2.38	1.4	2.22	0.39	2.49	1.38	0.3	0.52	66.25	21.5	41.89	18.67	82.57	50.22	73.63	12.24	91	55.47	11.02	17.65
BnaA01g11790D	2.9	13.26	3.15	15.62	92.22	452.23	110.91	598.98	3.62	2.86	2.23	14.09	13.02	12.67	2.54	3.42	3.49	14.87	15.8	16.19	123	84	69.66	413.13	469.57	474	88	112	132.74	623.11	597.22	576.61
BnaA01g11800D	2817.56	492.71	3384.34	518.64	56520.3	10894.5	75367.1	12665.5	2842.41	2737.54	2872.74	401.62	443.63	632.88	3373.56	3453.16	3326.31	507.92	560.76	487.23	61368.8	51116.8	57075.4	7478.28	10164.2	15040.9	74107.9	71715.9	80277.4	13520.4	13457.1	11018.9
BnaA01g11810D	0	0	0	0	0	0	0	0	0	0	0	0	0	0	0	0	0	0	0	0	0	0	0	0	0	0	0	0	0	0	0	0
BnaA01g11820D	0.1	0.04	0	0	0.67	0.33	0	0	0	0.15	0.14	0	0.12	0	0	0	0	0	0	0	0	1	1	0	1	0	0	0	0	0	0	0
BnaA01g11830D	14.16	3.37	10.22	4.27	147.08	38	118.68	54.09	12.7	13.47	16.31	3.26	4.41	2.43	8.91	10.45	11.3	4.65	2.78	5.39	142.36	130.6	168.27	31.48	52.47	30.05	101.64	112.76	141.63	64.33	34.62	63.31
BnaA01g11840D	17.69	49.67	25.02	11.51	414.12	1324.31	652.16	331.08	17.27	19.66	16.14	16.79	74.09	58.12	19.51	29.47	26.08	12.41	12.66	9.45	436.73	430	375.62	366.2	1988.62	1618.11	502.21	717	737.27	387	356	250.25
BnaA01g11850D	0.26	0.51	0.48	0	6.51	13.6	12.33	0	0.77	0	0	0.33	0.39	0.82	0.59	0.65	0.21	0	0	0	19.54	0	0	7.32	10.49	23	15.28	15.79	5.93	0	0	0
BnaA01g11860D	6.15	2.46	4.76	3.86	126.79	56.13	110.11	96.99	6.92	5.37	6.15	1.32	4.48	1.58	4.22	3.82	6.25	4.41	3.75	3.41	152.75	102.61	125	25.07	105	38.33	94.88	81.05	154.39	119.98	92	79
BnaA01g11870D	3.57	1.52	1.86	3.21	111.17	53.28	62.79	116.82	3.7	1.74	5.28	0.56	1.9	2.11	1.42	2.5	1.65	1.14	4.54	3.95	122.72	49.96	160.82	16	66.83	77	47.75	79.62	61	46.5	167.06	136.9
BnaA01g11880D	1.63	8.88	0.14	21.75	33.21	195.86	3.33	545.33	1.36	1.78	1.75	9.78	11.37	5.5	0.04	0.23	0.16	23.17	20.34	21.75	30	34	35.63	186.58	267	134	1	5	4	632	500	504
BnaA01g11890D	0	0	0	0	0	0	0	0	0	0	0	0	0	0	0	0	0	0	0	0	0	0	0	0	0	0	0	0	0	0	0	0
BnaA01g11900D	0	0	0	0	0	0	0	0	0	0	0	0	0	0	0	0	0	0	0	0	0	0	0	0	0	0	0	0	0	0	0	0
BnaA01g11910D	0	0	0	0.01	0	0	0	0.33	0	0	0	0	0	0	0	0	0	0.04	0	0	0	0	0	0	0	0	0	0	0	1	0	0
BnaA01g11920D	0.11	0.08	0.11	0.1	4.03	3.33	4.7	4.67	0.05	0.08	0.19	0.14	0.09	0.02	0.07	0.2	0.07	0.04	0.2	0.07	2	3	7.08	5	4	1	3	8.11	3	2	9	3
BnaA01g11930D	1.67	1.65	0.71	1.42	66.64	73.58	31.47	69.29	1.77	1.72	1.52	1.13	1.32	2.51	1.03	0.61	0.5	1.42	1.58	1.27	76	63.92	60	42	60.08	118.65	45.19	25.22	24	75.17	75.65	57.05
BnaA01g11940D	7.66	4.56	7.58	4.4	146.33	95.73	160.6	102.92	7.68	6.94	8.36	3.78	4.77	5.14	8.28	7.24	7.22	5.05	4.51	3.63	157.67	123.31	158	67	104	116.19	173	143.04	165.77	127.75	103	78
BnaA01g11950D	8.17	5.04	6.96	5.01	144.7	96.16	137.9	108.01	8.91	8.31	7.29	5.21	6.31	3.61	5.45	6.89	8.55	5.46	4.05	5.53	169.65	136.79	127.66	85.59	127.34	75.56	105.58	126.16	181.96	128.01	85.77	110.26
BnaA01g11960D	2.08	0.23	1.41	0.39	21.16	2.67	16.09	4.77	2.42	1.85	1.96	0.11	0.26	0.33	1.2	1.15	1.89	0.23	0.51	0.44	26.4	17.45	19.64	1	3	4	13.26	12	23	3.14	6.17	5
BnaA01g11970D	0	0	0	0	0	0	0	0	0	0	0	0	0	0	0	0	0	0	0	0	0	0	0	0	0	0	0	0	0	0	0	0
BnaA01g11980D	0	0	0	0	0	0	0	0	0	0	0	0	0	0	0	0	0	0	0	0	0	0	0	0	0	0	0	0	0	0	0	0
BnaA01g11990D	0	0	0.03	0	0	0	1	0	0	0	0	0	0	0	0	0	0.08	0	0	0	0	0	0	0	0	0	0	0	3	0	0	0
BnaA01g12000D	0	0	0	0	0	0	0	0	0	0	0	0	0	0	0	0	0	0	0	0	0	0	0	0	0	0	0	0	0	0	0	0
BnaA01g12010D	16.02	27.57	27.53	34.36	298.71	548.71	568	772.22	17.93	12.9	17.24	32.75	16.6	33.36	28.32	25.63	28.63	32.07	35.87	35.14	357.43	222.39	316.31	563.08	351.08	731.96	574.44	491.5	638.05	788.2	794.72	733.75
BnaA01g12020D	8.93	8.94	9.65	7.12	365.67	399.8	440.02	354.81	9.33	10.2	7.25	8.43	9.44	8.95	10.68	9.09	9.18	6.96	6.77	7.62	412.18	389.92	294.91	321.39	442.85	435.16	480.25	386.52	453.3	378.92	332.64	352.88
BnaA01g12030D	0	0	0	0	0	0	0	0	0	0	0	0	0	0	0	0	0	0	0	0	0	0	0	0	0	0	0	0	0	0	0	0
BnaA01g12040D	69.96	24.01	9.83	9.15	936.91	322.08	149.84	153.37	66.14	59.31	84.43	49.97	7.67	14.39	12.3	3.43	13.77	14.85	6.44	6.17	952.76	738.86	1119.12	620.83	117.26	228.14	180.33	47.48	221.7	263.82	103.18	93.12
BnaA01g12050D	0	0	0	0	0	0	0	0	0	0	0	0	0	0	0	0	0	0	0	0	0	0	0	0	0	0	0	0	0	0	0	0
BnaA01g12060D	15.04	10.8	43.85	15.11	263.56	209.26	852.65	323.42	14.75	15.59	14.79	8.46	11.03	12.92	33.34	53.26	44.94	15.69	14.78	14.87	278.68	254.81	257.18	137.89	221.2	268.7	640.96	967.89	949.1	365.6	310.45	294.2
BnaA01g12070D	0	0	0.06	0	0	0	0.67	0	0	0	0	0	0	0	0	0.1	0.08	0	0	0	0	0	0	0	0	0	0	1	1	0	0	0
BnaA01g12080D	39.17	26.18	51.81	23.34	864.44	634.33	1276.76	632.67	40.29	45.37	31.85	22.14	32.95	23.45	40.84	56.98	57.61	27.13	19.82	23.08	960	935	698.32	455	833	615	990	1306	1534.27	797	525	576
BnaA01g12090D	18.96	83.99	18.65	97.66	535.88	2594.07	588.4	3369.32	20.21	20.46	16.21	72.54	109.65	69.78	16.79	18.22	20.93	103.16	95.7	94.13	615.08	538.51	454.04	1903.87	3540.93	2337.42	519.71	533.41	712.09	3870.62	3236.88	3000.47
BnaA01g12100D	2.44	1.74	4.22	1.03	61.46	48.17	116.28	31.26	2.82	2.15	2.36	1.32	1.24	2.65	4.49	4.71	3.45	0.76	1.52	0.82	75.83	50.1	58.45	30.54	35.38	78.58	123	122	103.85	25.32	45.46	23
BnaA01g12110D	4.12	2.15	2.71	1.49	41.65	24	30.33	18.33	4.14	3.52	4.71	1.6	2.6	2.26	2.9	2.68	2.55	1.57	1.24	1.67	44.95	33	47	15	30	27	32	28	31	21	15	19
BnaA01g12120D	2.6	0.38	1.81	0.34	21.54	3.36	16.87	3.33	2	2.66	3.14	0.64	0	0.51	1.64	1.69	2.09	0.09	0.4	0.53	18	20.66	25.96	5	0	5.09	15	14.62	21	1	4	5
BnaA01g12130D	0.55	0.06	0.57	0.35	19	2.33	21.33	14	0.69	0.16	0.81	0.03	0.05	0.1	0.95	0.35	0.42	0.32	0.12	0.61	25	5	27	1	2	4	35	12	17	14	5	23
BnaA01g12140D	9.58	10.77	9.15	17.19	245.26	294.98	260.79	536.19	10.21	8.61	9.91	12.27	10.91	9.12	8.49	8.82	10.15	18.97	15.49	17.12	280.45	204.64	250.69	290.77	318.23	275.94	237.26	233.25	311.86	642.7	473.14	492.72
BnaA01g12150D	5.68	1.6	6.92	1.61	214.53	63.52	292.62	74.24	5.57	6.96	4.52	2.43	1.36	1.02	6.75	6.59	7.41	1.77	1.06	2	227.5	246.09	169.99	85.57	59	46	280.46	259	338.41	89	48	85.71
BnaA01g12160D	3.75	1.26	2.54	1.07	104.86	38.07	79	36.02	4.17	3.9	3.17	1.32	1.26	1.2	2.91	2.21	2.5	1	0.72	1.49	125.46	101.45	87.68	34.18	40.13	39.89	89	64	84	37	24	47.06
BnaA01g12170D	2.8	1.78	3.23	3.12	64	44	81	86	2.65	2.08	3.68	1.8	1.31	2.23	3.61	3.48	2.59	2.52	4.37	2.46	65	44	83	38	34	60	90	82	71	76	119	63
BnaA01g12180D	0.25	0	0.08	0.04	3.67	0	1.33	0.67	0.12	0.36	0.27	0	0	0	0.06	0.19	0	0.05	0.06	0	2	5	4	0	0	0	1	3	0	1	1	0
BnaA01g12190D	30.27	34.93	29.48	32.66	369	468.33	399	485.67	31.82	25.65	33.33	25.9	43.18	35.72	28.12	28.63	31.68	38.4	26.56	33.01	416	290	401	292	599	514	374	360	463	619	386	452
BnaA01g12200D	23.7	6.51	27.43	10.91	290.73	86.63	374.33	162.67	20.7	20.95	29.46	6.44	7.56	5.52	28.38	27.27	26.65	10.79	9.66	12.27	273.87	239.67	358.64	73.47	106.1	80.31	382	347	394	176	142	170
BnaA01g12210D	0	0	0	0	0	0	0	0	0	0	0	0	0	0	0	0	0	0	0	0	0	0	0	0	0	0	0	0	0	0	0	0
BnaA01g12220D	0	0.01	0	0	0	0.33	0	0	0	0	0	0	0.04	0	0	0	0	0	0	0	0	0	0	0	1	0	0	0	0	0	0	0
BnaA01g12230D	0	0	0	0	0	0	0	0	0	0	0	0	0	0	0	0	0	0	0	0	0	0	0	0	0	0	0	0	0	0	0	0
BnaA01g12240D	0	0	0	0	0	0	0	0	0	0	0	0	0	0	0	0	0	0	0	0	0	0	0	0	0	0	0	0	0	0	0	0
BnaA01g12250D	0	0	0	0	0	0	0	0	0	0	0	0	0	0	0	0	0	0	0	0	0	0	0	0	0	0	0	0	0	0	0	0
BnaA01g12260D	0	0	0	0	0	0	0	0	0	0	0	0	0	0	0	0	0	0	0	0	0	0	0	0	0	0	0	0	0	0	0	0
BnaA01g12270D	5.2	9.22	5.22	4.43	148.35	290.36	164.11	155.04	5.65	5.12	4.83	6.55	11.77	9.35	4.65	6.11	4.89	5.59	3.79	3.9	173	135.78	136.27	173.07	382.6	315.41	145	180.01	167.31	211.01	129.09	125.02
BnaA01g12280D	6.09	1.09	8.64	0.61	255.98	51.52	404.12	30.83	5.72	5.77	6.78	0.61	1.09	1.56	7.87	9.05	9	0.46	0.66	0.71	259.26	225.92	282.75	24	52.57	78	362.5	394.35	455.52	25.95	33	33.54
BnaA01g12290D	0.83	0.13	1.36	0.32	7	1.33	13.67	3.33	0.11	1.34	1.03	0	0.3	0.1	1.56	0.55	1.98	0	0.57	0.4	1	11	9	0	3	1	15	5	21	0	6	4
BnaA01g12300D	0	0	0	0	0	0	0	0	0	0	0	0	0	0	0	0	0	0	0	0	0	0	0	0	0	0	0	0	0	0	0	0
BnaA01g12310D	3.77	2.05	4.14	1.6	90.83	55.43	109.81	47.19	3.25	3.47	4.6	1.25	1.61	3.28	3.71	5.33	3.37	1.66	1.83	1.31	84.5	78	110	28	44.37	93.93	98.18	133.38	97.87	53.22	52.78	35.56
BnaA01g12320D	4.88	5.66	0.99	4.6	99.21	126.49	22.97	115.83	3.33	5.97	5.33	5.74	5.52	5.71	0.8	0.82	1.34	4.79	4.98	4.02	74	114.63	109	109.83	130.06	139.57	18.11	17.62	33.18	131.09	122.94	93.46
BnaA01g12330D	0	0	0	0	0	0	0	0	0	0	0	0	0	0	0	0	0	0	0	0	0	0	0	0	0	0	0	0	0	0	0	0
BnaA01g12340D	23.14	4.07	12.43	21.2	244.25	47.8	149.77	274.42	16.5	32.05	20.86	3.58	4.15	4.47	0.09	17.93	19.28	18.84	17.56	27.21	190.63	320.29	221.82	35.65	50.85	56.91	1	199.24	249.07	268.35	225.56	329.34
BnaA01g12350D	0	0	0	0.05	0	0	0	0.67	0	0	0	0	0	0	0	0	0	0	0	0.16	0	0	0	0	0	0	0	0	0	0	0	2
BnaA01g12360D	21.47	6.29	11.2	7.77	481.72	151.98	281.74	210.71	20.73	23.4	20.28	7.18	5.95	5.74	11.51	9.69	12.39	6.48	7.46	9.36	502.35	490.45	452.37	150	152.95	153	283.74	225.93	335.54	193.48	201.07	237.58
BnaA01g12370D	0	0.04	0	0	0	0.67	0	0	0	0	0	0	0	0.13	0	0	0	0	0	0	0	0	0	0	0	2	0	0	0	0	0	0
BnaA01g12380D	43.73	2.83	26.81	3.15	1170.17	83.68	797.99	103.28	44.53	45.14	41.52	2.24	2.71	3.54	20.2	31.05	29.18	3.52	3.05	2.88	1283.75	1125.39	1101.38	55.79	83	112.25	592.53	861.06	940.38	125.23	97.57	87.03
BnaA01g12390D	2.99	2.62	1.99	2.33	66.91	64.3	49.51	63.61	2.99	3.01	2.97	2.18	2.9	2.77	1.91	1.99	2.07	2.49	2.4	2.09	72.12	62.69	65.91	45.38	74.19	73.33	46.75	46	55.78	74	64.2	52.63
BnaA01g12400D	1.95	1.44	2.29	0.4	77.33	63.28	99.06	19.33	2.32	1.45	2.09	0.69	2.16	1.47	2.49	2.57	1.82	0.54	0.3	0.36	98	53	81	25	96.84	68	106.87	104.3	86	28	14	16
BnaA01g12410D	0	0	0	0	0	0	0	0	0	0	0	0	0	0	0	0	0	0	0	0	0	0	0	0	0	0	0	0	0	0	0	0
BnaA01g12420D	0	0	0	0	0	0	0	0	0	0	0	0	0	0	0	0	0	0	0	0	0	0	0	0	0	0	0	0	0	0	0	0
BnaA01g12430D	1.49	0.71	2.17	0.84	9	4.67	14.67	6	1.55	1.25	1.68	0.54	0.88	0.7	1.68	1.77	3.05	0.88	0	1.63	10	7	10	3	6	5	11	11	22	7	0	11
BnaA01g12440D	0.08	0	0.06	0.1	1.08	0	0.76	1.55	0.16	0	0.09	0	0	0	0	0.18	0	0.29	0	0	2.12	0	1.12	0	0	0	0	2.28	0	4.66	0	0
BnaA01g12450D	5.23	4.02	4.32	2.68	107.62	90.73	98.23	66.83	5.23	5.09	5.38	3.31	4.99	3.76	4.41	4.8	3.76	2.49	2.64	2.9	115.8	97.46	109.61	63.3	117.28	91.61	99.34	102.2	93.16	68.12	65.1	67.26
BnaA01g12460D	0.57	10.9	1.09	58.46	7.67	154.25	16.67	960.67	0.62	0.48	0.6	15.69	9.04	7.97	0.75	0.93	1.6	63.12	50.67	61.59	9	6	8	196.27	139.17	127.31	11	13	26	1129	817	936
BnaA01g12470D	0.99	0.47	0.9	1.24	30.67	15.67	30.67	47	0.9	1.04	1.04	0.52	0.34	0.55	0.77	1.06	0.86	1.49	1.27	0.95	30	30	32	15	12	20	26	34	32	61	47	33
BnaA01g12480D	0.14	0.14	0.35	0.81	2	2.33	5.67	14.33	0.06	0.22	0.14	0	0.36	0.06	0.25	0.4	0.4	0.83	0.8	0.79	1	3	2	0	6	1	4	6	7	16	14	13
BnaA01g12490D	0.96	2.96	2.12	8.39	27.62	90.4	67.27	287.44	1.51	0.88	0.5	3.07	2.67	3.14	1.36	2.19	2.82	8.12	8.14	8.92	45.86	23	14	80.31	85.94	104.95	42.02	63.99	95.8	303.89	274.85	283.59
BnaA01g12500D	0	0	0	0	0	0	0	0	0	0	0	0	0	0	0	0	0	0	0	0	0	0	0	0	0	0	0	0	0	0	0	0
BnaA01g12510D	11.27	3.15	10.43	4.76	155.33	48.67	160.01	79.99	10.44	10.43	12.95	1.95	2.6	4.89	11.51	9.48	10.29	4.81	4.91	4.56	155	134	177	25	41	80	173.83	135.38	170.82	88	80.97	71
BnaA01g12520D	0.6	0.45	0.66	0.44	26.33	22.33	31.99	23.29	0.36	0.56	0.89	0.22	0.66	0.48	0.73	0.83	0.43	0.36	0.36	0.6	17	23	39	9	33	25	34.97	38	23	20.86	19	30
BnaA01g12530D	5.6	7.79	13.5	9.89	115.1	172.27	309.35	243.05	9	4.64	3.16	5.57	14.45	3.35	8.11	10.73	21.65	11.32	7.01	11.33	195.31	87	63	104.25	332.56	80	179	224	525.05	302.81	169	257.35
BnaA01g12540D	238.67	186.7	326.06	186.99	4010.19	3360.19	6101.39	3822.83	234.42	261.68	219.92	231.34	146.53	182.24	351.32	316.16	310.71	177.4	181.55	202.01	4253	4105.95	3671.62	3619.8	2821.24	3639.52	6485.23	5517.6	6301.34	3968.27	3661.15	3839.06
BnaA01g12550D	0	0	0	0	0	0	0	0	0	0	0	0	0	0	0	0	0	0	0	0	0	0	0	0	0	0	0	0	0	0	0	0
BnaA01g12560D	2.15	1.5	1.74	1.1	57.93	44.93	51.95	36.28	1.68	1.74	3.02	1.09	1.76	1.66	1.31	2.17	1.73	1.07	1.2	1.03	48.86	43.92	81	27.28	54.3	53.2	38.72	60.69	56.43	38.33	38.97	31.55
BnaA01g12570D	9.59	13.9	5.54	6.42	167.67	273	108.86	137.98	7.94	11.8	9.03	8.05	23.22	10.44	4.55	6.04	6.03	6.59	6.03	6.63	151	194	158	132	468.57	218.42	88	110.42	128.17	154.45	127.49	132
BnaA01g12580D	0.13	0.18	0	0.01	4.33	6.09	0	0.33	0.17	0.2	0.03	0.3	0.22	0.03	0	0	0	0.02	0	0	6	6	1	9.15	8.12	1	0	0	0	1	0	0
BnaA01g12590D	5.51	0.35	1.07	0.77	196	14	42.44	33.33	6.06	5.83	4.63	0.18	0.37	0.5	0.88	1.22	1.12	0.68	0.89	0.75	232	193	163	6	15	21	34.31	45	48	32	38	30
BnaA01g12600D	0	0	0	0	0	0	0	0	0	0	0	0	0	0	0	0	0	0	0	0	0	0	0	0	0	0	0	0	0	0	0	0
BnaA01g12610D	0	0	0	0	0	0	0	0	0	0	0	0	0	0	0	0	0	0	0	0	0	0	0	0	0	0	0	0	0	0	0	0
BnaA01g12620D	0	0	0	0	0	0	0	0	0	0	0	0	0	0	0	0	0	0	0	0	0	0	0	0	0	0	0	0	0	0	0	0
BnaA01g12630D	0	0	0	0	0	0	0	0	0	0	0	0	0	0	0	0	0	0	0	0	0	0	0	0	0	0	0	0	0	0	0	0
BnaA01g12640D	2.24	0.59	1.95	0.8	34.02	10.1	33.21	15.03	1.71	2.81	2.2	0.52	0.17	1.09	1.83	2.14	1.88	1.05	0.55	0.79	28.35	40.23	33.48	7.42	3.07	19.82	30.82	34.02	34.8	21.42	10.07	13.61
BnaA01g12650D	1.75	0.15	0.66	0.06	57	5.33	23.33	2.33	2.47	1.18	1.61	0.1	0.11	0.24	0.37	0.85	0.76	0.05	0.05	0.08	85	35	51	3	4	9	13	28	29	2	2	3
BnaA01g12660D	2.21	2.01	1.63	0.95	60.67	57.04	49.35	32	2.03	1.96	2.65	3.46	0.92	1.66	1.37	2.04	1.48	1.1	0.97	0.78	60	50.01	72	88.11	29	54	41.06	58	49	40	32	24
BnaA01g12670D	0.86	0.1	1.12	0.34	25.46	3.33	37.18	12.2	1	0.66	0.91	0.11	0	0.2	0.63	1.08	1.65	0.28	0.36	0.39	31.64	18.09	26.64	3	0	7	20.18	32.94	58.41	11	12.59	13
BnaA01g12680D	2.33	0.16	0.56	0.13	47.23	3.67	12.67	3.33	2.88	2.5	1.6	0.05	0.3	0.13	0.54	0.62	0.53	0.19	0.17	0.04	62.7	47	32	1	7	3	12	13	13	5	4	1
BnaA01g12690D	0.13	0.03	0.12	0.02	3.67	1	3.73	0.71	0.17	0	0.23	0	0.1	0	0.1	0.04	0.22	0.03	0.03	0	5	0	6	0	3	0	3	1	7.18	1	1.12	0
BnaA01g12700D	0	0	0	0	0	0	0	0	0	0	0	0	0	0	0	0	0	0	0	0	0	0	0	0	0	0	0	0	0	0	0	0
BnaA01g12710D	0	0	0	0	0	0	0	0	0	0	0	0	0	0	0	0	0	0	0	0	0	0	0	0	0	0	0	0	0	0	0	0
BnaA01g12720D	0	0	0	0	0	0	0	0	0	0	0	0	0	0	0	0	0	0	0	0	0	0	0	0	0	0	0	0	0	0	0	0
BnaA01g12730D	1.15	0.02	0.21	0.01	34.12	0.67	7	0.33	1.07	0.8	1.59	0.07	0	0	0.28	0.07	0.28	0.03	0	0	34	22	46.35	2	0	0	9	2	10	1	0	0
BnaA01g12740D	0.48	0.22	0.93	0.21	48.4	24.67	104.77	26.33	0.47	0.59	0.37	0.15	0.34	0.17	0.83	1.2	0.77	0.24	0.18	0.21	51.66	56	37.53	14	40	20	92.53	127	94.77	33	22	24
BnaA01g12750D	0	0	0.03	0	0	0	0.33	0	0	0	0	0	0	0	0	0.08	0	0	0	0	0	0	0	0	0	0	0	1	0	0	0	0
BnaA01g12760D	0	0	0	0	0	0	0	0	0	0	0	0	0	0	0	0	0	0	0	0	0	0	0	0	0	0	0	0	0	0	0	0
BnaA01g12770D	0	0	0	0	0	0	0	0	0	0	0	0	0	0	0	0	0	0	0	0	0	0	0	0	0	0	0	0	0	0	0	0
BnaA01g12780D	0	0	0	0	0	0	0	0	0	0	0	0	0	0	0	0	0	0	0	0	0	0	0	0	0	0	0	0	0	0	0	0
BnaA01g12790D	1.48	0.25	0.98	0.16	43.35	8	31.79	5.33	2.22	1.43	0.79	0.26	0.15	0.35	0.82	0.97	1.16	0.13	0.09	0.25	68.95	38.5	22.6	7	5	12	26	29	40.38	5	3	8
BnaA01g12800D	2.57	0.9	1.06	1.42	111.21	41.33	50.48	75	2.77	2.8	2.15	1.19	0.47	1.03	1.48	0.94	0.76	1.6	1.12	1.54	129	112.62	92	48	23	53	70.04	42	39.4	92	58	75
BnaA01g12810D	3.4	1.26	1.62	2.39	79.48	30.6	42.66	68.82	3.41	2.97	3.83	1.9	1.31	0.58	0.98	1.5	2.38	3.46	1.23	2.49	85.6	64.42	88.43	41	34.75	16.05	25.05	36.12	66.82	106.95	34.18	65.32
BnaA01g12820D	0.09	0.01	0	0	2	0.33	0	0	0.04	0.05	0.18	0	0	0.04	0	0	0	0	0	0	1	1	4	0	0	1	0	0	0	0	0	0
BnaA01g12830D	0.69	0	0.2	1.58	7	0	2.33	19.67	0.72	1.15	0.2	0	0	0	0	0.28	0.32	1.32	1.87	1.56	8	11	2	0	0	0	0	3	4	18	23	18
BnaA01g12840D	0.07	0.06	0.15	0.09	1.67	1.67	4	2.67	0	0	0.21	0.04	0.04	0.1	0.11	0.24	0.1	0.06	0.1	0.11	0	0	5	1	1	3	3	6	3	2	3	3
BnaA01g12850D	0	0	0	0	0	0	0	0	0	0	0	0	0	0	0	0	0	0	0	0	0	0	0	0	0	0	0	0	0	0	0	0
BnaA01g12860D	4.7	3.44	4.65	4.57	65.88	51.16	73.05	78.89	3.16	4.53	6.4	4.95	2.46	2.9	5.71	4.08	4.15	4.66	4.64	4.41	48.22	59.72	89.71	65.08	39.78	48.61	88.54	59.84	70.78	87.66	78.66	70.34
BnaA01g12870D	3.21	10.18	3.43	2.58	86.33	304.02	102.49	85.38	1.91	3.31	4.41	9	9.02	12.51	3.35	4.38	2.56	2.52	2.73	2.48	56	84	119	227.54	280.6	403.91	100	123.46	84	91	89	76.15
BnaA01g12880D	0	0	0	0	0	0	0	0	0	0	0	0	0	0	0	0	0	0	0	0	0	0	0	0	0	0	0	0	0	0	0	0
BnaA01g12890D	53.23	20.63	19.52	8.98	790.33	329	318.33	155	57.65	59.65	42.4	26.1	4.42	31.36	31.65	16.45	10.46	3.55	3.38	20	922	825	624	360	75	552	515	253	187	70	60	335
BnaA01g12900D	115.83	79.79	83.44	48.79	3510.55	2637.5	2801.29	1797.68	122.1	113.01	112.37	70.9	94.65	73.82	83.14	86.81	80.36	49.81	46.29	50.28	3978.15	3184.33	3369.17	1992.35	3272.6	2647.55	2756.21	2720.83	2926.84	2000.9	1676.3	1715.84
BnaA01g12910D	1.57	0.15	0.36	0.11	47.98	5.35	12.21	4	1.6	1.95	1.15	0.07	0.11	0.27	0.3	0.57	0.22	0.1	0.16	0.06	53	55.94	35	2	4.04	10	10.27	18.13	8.24	4	6	2
BnaA01g12920D	12.77	6.86	6	6.6	422.3	240.67	221.53	268.25	11.99	14.44	11.87	9.54	5.24	5.8	5.47	6.4	6.12	6.73	7.79	5.28	429	447	390.91	294.43	199	228.59	199.12	220.46	245	296.76	310	198
BnaA01g12930D	64.92	20.77	24.05	18.58	2351.65	810.47	973.9	823.2	58	71.89	64.88	25.64	12.48	24.2	14.06	30.51	27.59	17.01	22.19	16.54	2274.75	2438.41	2341.78	867.24	519.37	1044.8	561.26	1150.88	1209.55	822.73	967.44	679.42
BnaA01g12940D	2.34	0.11	0.14	0.23	74.02	3.67	5	8.89	1.77	2.59	2.65	0.2	0	0.13	0.09	0.03	0.29	0.19	0.1	0.41	61	77.07	84	6	0	5	3	1	11	8	4	14.68
BnaA01g12950D	0.04	0	0	0.01	2.67	0	0	0.67	0.04	0.05	0.03	0	0	0	0	0	0	0	0	0.03	3	3	2	0	0	0	0	0	0	0	0	2
BnaA01g12960D	2.31	0.15	0.19	0.17	74.33	5	6.67	6.67	2.83	2.02	2.09	0.17	0.25	0.03	0.17	0.21	0.18	0.21	0.18	0.11	97	60	66	5	9	1	6	7	7	9	7	4
BnaA01g12970D	0	0	0	0	0	0	0	0	0	0	0	0	0	0	0	0	0	0	0	0	0	0	0	0	0	0	0	0	0	0	0	0
BnaA01g12980D	0.42	0.23	0.17	0.1	12.67	7.67	5.33	3.67	0.6	0.36	0.31	0.04	0.56	0.09	0.12	0.36	0.03	0.13	0	0.18	19	10	9	1	19	3	4	11	1	5	0	6
BnaA01g12990D	0.3	0.16	0.21	0.03	5.67	3.33	4.33	0.67	0.62	0.18	0.11	0	0.24	0.23	0.2	0.16	0.28	0.04	0	0.05	12	3	2	0	5	5	4	3	6	1	0	1
BnaA01g13000D	13.62	6.9	15.97	5.5	166	93	215.67	81.67	14.5	13.67	12.68	4.95	7.98	7.76	13.8	17.92	16.18	5.88	5.22	5.39	190	155	153	56	111	112	184	226	237	95	76	74
BnaA01g13010D	0.03	0	0.01	0	0.67	0	0.33	0	0	0	0.09	0	0	0	0	0.04	0	0	0	0	0	0	2	0	0	0	0	1	0	0	0	0
BnaA01g13020D	0.05	0	0.19	0	1	0	3.67	0	0.05	0	0.11	0	0	0	0.1	0.38	0.09	0	0	0	1	0	2	0	0	0	2	7	2	0	0	0
BnaA01g13030D	0.05	0.06	0.19	0.12	1	1.33	4	2.67	0.1	0	0.05	0	0.19	0	0.2	0.05	0.32	0.16	0.09	0.1	2	0	1	0	4	0	4	1	7	4	2	2
BnaA01g13040D	39.84	36.51	52.18	28.96	782.1	784.34	1137.54	689	42.02	38.33	39.17	30.47	44.38	34.67	46.58	54.82	55.14	27.26	30.24	29.37	886.44	699.4	760.45	554.43	993.54	805.04	999.82	1112.45	1300.36	709	709	649
BnaA01g13050D	0.21	0.07	0.07	0.01	9.67	3.67	3.33	0.67	0.25	0.12	0.27	0	0.04	0.17	0.16	0	0.04	0.02	0	0.02	12	5	12	0	2	9	8	0	2	1	0	1
BnaA01g13060D	0.72	2.59	1.03	2.81	6	23.67	9.67	28.67	0.89	0.65	0.61	1.81	4.73	1.22	1.1	0.58	1.4	3.62	1.51	3.3	8	5	5	14	45	12	10	5	14	40	15	31
BnaA01g13070D	0	0	0	0	0	0	0	0	0	0	0	0	0	0	0	0	0	0	0	0	0	0	0	0	0	0	0	0	0	0	0	0
BnaA01g13080D	8.14	2.76	2.22	2.6	153.2	53.58	46.57	60.55	8.55	7.95	7.93	4.52	1.96	1.79	3.04	1.52	2.11	3.84	1.56	2.41	173	139	147.6	78.86	42	39.87	62.54	29.51	47.66	95.64	35	51
BnaA01g13090D	0.81	1.07	1.23	2.6	24.5	35.36	41.11	97.48	0.61	0.74	1.07	1.16	0.77	1.27	1.4	1.5	0.79	3.09	2.2	2.51	20	21	32.51	33	27	46.08	47	47.36	28.98	125.44	80.42	86.59
BnaA01g13100D	0.53	0.34	0.13	0.19	3.67	2.67	1	1.67	0.13	1.05	0.42	0.3	0.37	0.35	0.13	0.27	0	0.32	0	0.25	1	7	3	2	3	3	1	2	0	3	0	2
BnaA01g13110D	0.16	0	0.22	0	1.67	0	2.33	0	0.37	0	0.1	0	0	0	0.27	0.38	0	0	0	0	4	0	1	0	0	0	3	4	0	0	0	0
BnaA01g13120D	0	0.01	0	0	0	0.22	0	0	0	0	0	0.02	0.02	0	0	0	0	0	0	0	0	0	0	0.33	0.33	0	0	0	0	0	0	0
BnaA01g13130D	6.15	3.24	8.45	4.07	168.31	98.24	251.67	133.99	6.36	3.68	8.4	2.18	2.51	5.02	10.62	9.42	5.32	3.22	5.44	3.56	185.93	93	226	55	78	161.72	316	265	174	116	177	108.98
BnaA01g13140D	0.26	0.05	0.06	0.01	6.67	1.33	1.67	0.33	0.22	0.33	0.23	0.08	0.07	0	0.04	0.04	0.1	0.03	0	0	6	8	6	2	2	0	1	1	3	1	0	0
BnaA01g13150D	0	0	0	0	0	0	0	0	0	0	0	0	0	0	0	0	0	0	0	0	0	0	0	0	0	0	0	0	0	0	0	0
BnaA01g13160D	0	0	0	0	0	0	0	0	0	0	0	0	0	0	0	0	0	0	0	0	0	0	0	0	0	0	0	0	0	0	0	0
BnaA01g13170D	5.95	5.84	3.97	5.4	109.33	117.99	81.33	120.96	5.63	4.57	7.66	4.64	6.25	6.63	4.13	3.53	4.26	6.13	4.55	5.52	111	78	139	79	130.96	144	83	67	94	149	99.89	114
BnaA01g13180D	0	0.01	0	0.01	0	0.33	0	0.33	0	0	0	0.04	0	0	0	0	0	0	0	0.03	0	0	0	1	0	0	0	0	0	0	0	1
BnaA01g13190D	0.92	0.43	0.34	0.25	14.33	7.33	6	4.67	0.9	0.69	1.17	0.35	0.68	0.27	0.41	0.12	0.48	0.19	0.16	0.4	15	10	18	5	12	5	7	2	9	4	3	7
BnaA01g13200D	0	0	0	0	0	0	0	0	0	0	0	0	0	0	0	0	0	0	0	0	0	0	0	0	0	0	0	0	0	0	0	0
BnaA01g13210D	1.02	14.72	1.68	19.37	18.8	286.57	34.12	439.74	0.85	1.28	0.94	21.88	8.47	13.81	0.85	2.79	1.41	22.69	15.25	20.18	17	22.19	17.21	376.75	179.44	303.52	17.26	53.66	31.45	558.61	338.45	422.16
BnaA01g13220D	1.81	2.33	1.51	1.51	97.51	139.36	90.19	100.33	1.95	1.96	1.53	1.46	3.34	2.19	1.37	1.63	1.52	2.02	1.15	1.37	113	98	81.52	73	205.57	139.51	81	91	98.56	144	74	83
BnaA01g13230D	0	0	0	0	0	0	0	0	0	0	0	0	0	0	0	0	0	0	0	0	0	0	0	0	0	0	0	0	0	0	0	0
BnaA01g13240D	0	0	0	0	0	0	0	0	0	0	0	0	0	0	0	0	0	0	0	0	0	0	0	0	0	0	0	0	0	0	0	0
BnaA01g13250D	0.04	0	0.02	0.08	0.67	0	0.33	1.67	0.11	0	0	0	0	0	0	0.06	0	0.09	0.15	0	2	0	0	0	0	0	0	1	0	2	3	0
BnaA01g13260D	0	0	0	0	0	0	0	0	0	0	0	0	0	0	0	0	0	0	0	0	0	0	0	0	0	0	0	0	0	0	0	0
BnaA01g13270D	0	0	0	0	0	0	0	0	0	0	0	0	0	0	0	0	0	0	0	0	0	0	0	0	0	0	0	0	0	0	0	0
BnaA01g13280D	259.41	79.27	24.04	27.49	6462.62	2213.11	680.73	856.22	215.59	308.76	253.87	46.76	135.71	55.35	7.83	28.08	36.2	37.66	23.84	20.96	5835.91	7228.27	6323.67	1091.64	3898.4	1649.3	215.67	731.05	1095.48	1257	717.29	594.38
BnaA01g13290D	9.47	3.01	9.98	4.92	109.33	37	127	68.67	13.35	9.41	5.66	3.3	2.91	2.81	4.4	12.86	12.67	5.41	4.83	4.51	164	100	64	35	38	38	55	152	174	82	66	58
BnaA01g13300D	2.34	0.43	1.85	0.64	30	6	26.33	10	2.4	2.01	2.6	0.42	0.27	0.59	2.57	1.28	1.69	0.65	0.65	0.62	33	24	33	5	4	9	36	17	26	11	10	9
BnaA01g13310D	120.15	196.67	125.65	167.22	2211.09	3918.24	2562.27	3750.61	120.13	112.55	127.76	200.29	202.01	187.7	133.63	126.24	117.07	181.1	144.78	175.77	2378.44	1927.2	2327.64	3420	4244.22	4090.49	2691.86	2404.19	2590.76	4420.58	3186.02	3645.22
BnaA01g13320D	9.13	8.33	5.55	5.54	417.59	411.02	280.69	308.38	9.74	8.91	8.73	8.87	7.99	8.13	4.87	6.33	5.44	5.44	6.26	4.92	478.77	379	395	376	416.79	440.27	243.69	299.2	299.18	329.86	342.09	253.2
BnaA01g13330D	15.41	9.86	9.12	6.77	440.02	296.53	287.56	232.98	16.82	13.26	16.14	13.5	6.82	9.26	10.42	8.66	8.28	5.89	7.15	7.28	514.67	350.92	454.47	356.26	221.55	311.79	324.41	254.94	283.34	222.41	243.24	233.29
BnaA01g13340D	2.09	0.67	1.44	0.42	53	19.33	40	13.33	2.08	2.41	1.79	0.3	0.72	1	0.54	2.36	1.41	0.56	0.33	0.38	57	57	45	7	21	30	15	62	43	19	10	11
BnaA01g13350D	1.02	0.37	0.38	1.22	13.33	5.33	5.67	19.67	1.29	1.08	0.7	0.33	0.27	0.52	0.07	0.37	0.71	1.92	0.45	1.3	18	13	9	4	4	8	1	5	11	33	7	19
BnaA01g13360D	1.08	0.06	0.26	0.01	41	2.67	10.86	0.67	1.37	1.47	0.4	0.06	0.02	0.11	0.17	0.32	0.28	0.02	0.02	0	56	52	15	2	1	5	7	12.71	12.88	1	1	0
BnaA01g13370D	9.61	2.31	2.22	1.57	89	22.55	22.85	17.67	8.31	8.11	12.41	3.48	0.82	2.64	3.51	1.55	1.61	1.95	0.36	2.39	83	70	114	30	8.66	29	35.7	14.84	18	24	4	25
BnaA01g13380D	0	0	0	0	0	0	0	0	0	0	0	0	0	0	0	0	0	0	0	0	0	0	0	0	0	0	0	0	0	0	0	0
BnaA01g13390D	16.89	18.41	19.98	6.75	392.38	462.65	516.52	192.94	16.31	18.87	15.49	19.46	21.94	13.82	23	19.11	17.84	8.28	4.74	7.23	409.55	409.73	357.87	421.46	584.64	381.85	587.43	461.47	500.67	256.27	132.35	190.21
BnaA01g13400D	9.12	3.02	8.8	2.12	310.67	113.67	335.1	87.58	7.31	9.49	10.57	2.73	2.04	4.28	9.42	8.68	8.31	1.71	2.29	2.35	270	303	359	87	80	174	353.85	308.4	343.06	77.85	93.9	91
BnaA01g13410D	0	0	0	0	0	0	0	0	0	0	0	0	0	0	0	0	0	0	0	0	0	0	0	0	0	0	0	0	0	0	0	0
BnaA01g13420D	0.8	0.79	0.31	0.74	12	12.67	5.33	13.67	0.8	1	0.6	0.93	0.87	0.56	0.55	0.06	0.33	0.85	0.72	0.65	13	14	9	13	15	10	9	1	6	17	13	11
BnaA01g13430D	1.94	0.78	1.5	0.57	42.67	19.52	36.03	14.98	1.82	1.47	2.53	0.44	0.21	1.7	1.69	1.83	0.98	0.55	0.34	0.81	43.02	30	55	9	5.29	44.26	40.64	41.6	25.85	16	8.93	20
BnaA01g13440D	144.45	5.95	19.67	7.02	2549.03	112.91	398.7	152.93	143.85	171.37	118.12	7.29	4.04	6.52	3.53	18.82	36.67	8.4	6.64	6.03	2744.94	2828.02	2074.13	120.04	81.79	136.89	68.56	345.38	782.15	197.53	140.74	120.52
BnaA01g13450D	0	0	0	0	0	0	0	0	0	0	0	0	0	0	0	0	0	0	0	0	0	0	0	0	0	0	0	0	0	0	0	0
BnaA01g13460D	1.95	0.36	1.6	0.38	46.63	9.81	41.71	10.78	1.36	0.36	4.12	0.05	0.34	0.69	1.74	1.83	1.22	0.16	0.75	0.22	34.88	8	97	1	9.09	19.35	45.14	44.98	35	5	21.33	6
BnaA01g13470D	46.03	47.29	21.85	56.21	1709.27	1833.61	911.16	2568.38	44.75	41.52	51.81	72.19	32.19	37.48	21.24	17.56	26.76	71.06	47.26	50.32	1788.17	1434.74	1904.89	2487.47	1365.05	1648.32	863.39	674.94	1195.14	3500.62	2098.7	2105.83
BnaA01g13480D	7.31	5.85	5.19	6.84	174.86	149.44	139.23	199.34	6.86	6.12	8.94	7.14	4.92	5.49	4.61	4.56	6.4	7.43	5.91	7.17	176.67	136.23	211.69	158.52	134.26	155.54	120.63	112.84	184.21	235.77	169	193.26
BnaA01g13490D	2.12	1.79	0.94	0.4	12	10.83	6	2.67	1.9	0.77	3.69	2.02	0.94	2.41	0.65	0.77	1.41	0.27	0.6	0.32	11.5	4	20.5	10.5	6	16	4	4.5	9.5	2	4	2
BnaA01g13500D	26.4	63.83	25.69	62.31	302.33	793.55	330.51	877.15	26.54	29.1	23.57	63.96	72.6	54.92	15.19	28.18	33.7	75.29	49.58	62.07	328	311	268	681.65	952	747	191	334.99	465.53	1147	681	803.46
BnaA01g13510D	65.84	18.23	56.25	7.31	763.22	227	721.93	102.76	67.45	56.22	73.84	21.06	11.13	22.49	67.95	49.71	51.09	6.59	8.98	6.37	839.23	605	845.42	226	147	308	860.22	595	710.58	101.07	124.21	83
BnaA01g13520D	3.83	0.86	2.53	0.99	54.33	13.67	39.33	17	3.94	3.49	4.06	0.46	0.62	1.49	3.61	2.52	1.47	0.85	1.12	1	60	46	57	6	10	25	56	37	25	16	19	16
BnaA01g13530D	4.04	8.9	4.07	8.18	75	180.01	84.5	185.3	4.1	4.28	3.75	8.46	9.94	8.31	3.78	3.79	4.63	8.63	7.6	8.3	82	74	69	146	211	183.03	77	73	103.49	212.9	169	174
BnaA01g13540D	12.53	9.99	8.17	4.63	273.75	242.99	201.28	123.91	12.2	13.78	11.62	6.23	15.29	8.46	6.58	7.27	10.66	4.77	5.05	4.06	287.81	281.12	252.32	126.73	382.6	219.64	157.84	164.88	281.11	138.84	132.45	100.43
BnaA01g13550D	5.24	1.47	3.84	1.06	57.77	17.96	47.28	14.18	5.5	5.06	5.17	1.03	1.95	1.44	3.77	3.4	4.36	1	1.43	0.74	65.13	51.83	56.34	10.54	24.52	18.81	45.44	38.71	57.68	14.56	18.83	9.16
BnaA01g13560D	15.44	4.3	9.85	3.83	683.1	204.98	483.21	206.81	13.88	14.98	17.46	5	3.19	4.7	10.38	10.47	8.69	3.95	3.37	4.18	662.94	619.01	767.36	206.09	161.89	246.96	504.69	481	463.94	232.42	178.76	209.24
BnaA01g13570D	0.36	0.14	0.29	0.16	9.67	3.67	8.67	5	0.38	0.52	0.19	0.36	0.07	0	0.62	0	0.25	0.11	0.19	0.17	11	13	5	9	2	0	18	0	8	4	6	5
BnaA01g13580D	1.87	0.77	0.99	1.21	71.33	31.33	41.33	55.46	1.98	1.67	1.97	0.91	0.76	0.65	1.04	1.1	0.83	1.15	1.15	1.32	81	59	74	32	33	29	43	43	38	57.88	52	56.5
BnaA01g13590D	0	0	0	0	0	0	0	0	0	0	0	0	0	0	0	0	0	0	0	0	0	0	0	0	0	0	0	0	0	0	0	0
BnaA01g13600D	0.01	0.03	0	0	0.33	1	0	0	0	0	0.04	0	0	0.09	0	0	0	0	0	0	0	0	1	0	0	3	0	0	0	0	0	0
BnaA01g13610D	7.7	2.41	11.27	1.67	94.97	32.65	151.11	24.39	11.21	4.63	7.27	1.43	2.39	3.42	12.68	10.62	10.5	1.33	2.06	1.61	145.85	52.05	87	16	32.94	49	167.8	132.88	152.65	21.36	29.82	22
BnaA01g13620D	2.44	2.56	5.45	2.3	65.67	75.33	154.67	72.67	4.26	0.5	2.57	1.2	1.96	4.52	6.34	6.52	3.49	2.44	2.09	2.36	119	12	66	29	58	139	180	175	109	84	65	69
BnaA01g13630D	9.73	5.23	8.55	7.02	221.49	128.66	215.83	196.55	9.74	8.9	10.54	5.49	5.03	5.17	9.11	8.5	8.04	8.78	6.14	6.14	238.56	188.43	237.49	115.91	130.8	139.28	227	200.32	220.16	265.06	167.03	157.55
BnaA01g13640D	0	0	0	0	0	0	0	0	0	0	0	0	0	0	0	0	0	0	0	0	0	0	0	0	0	0	0	0	0	0	0	0
BnaA01g13650D	2.23	0.81	2.29	1.07	93.67	37	106.67	54	2.26	2	2.43	0.72	0.75	0.95	2.68	2.03	2.16	0.72	1.42	1.08	102	78	101	28	36	47	123	88	109	40	71	51
BnaA01g13660D	0.19	0	0.13	0	2.33	0	1.67	0	0.15	0.35	0.08	0	0	0	0.15	0.16	0.07	0	0	0	2	4	1	0	0	0	2	2	1	0	0	0
BnaA01g13670D	54.71	13.63	50.05	10.5	3348.89	907.88	3388.06	780.66	60.35	49.35	54.44	12.32	14.42	14.16	53.78	48.33	48.05	11.39	9.07	11.05	3959.65	2800.25	3286.77	697.03	1003.91	1022.71	3590.02	3050.36	3523.81	921.18	661.58	759.23
BnaA01g13680D	0	0	0	0	0	0	0	0	0	0	0	0	0	0	0	0	0	0	0	0	0	0	0	0	0	0	0	0	0	0	0	0
BnaA01g13690D	22.57	18.9	23.95	14.03	299.79	275.87	353.3	226.61	23.41	20.66	23.64	14.63	23.37	18.7	21.99	24.55	25.31	14.76	12.86	14.47	334	254.94	310.42	180	353.89	293.72	319.2	337	403.71	259.57	204	216.25
BnaA01g13700D	34.42	44.22	31.92	56.48	755.72	1041.73	784.39	1521.02	32.57	38.61	32.09	54.22	36.73	41.7	33.19	29.36	33.2	61.56	51.83	56.04	773.33	792.84	701	1110.15	925.27	1089.78	801.65	670.46	881.06	1801.93	1367.62	1393.51
BnaA01g13710D	4.53	0.53	3.16	0.6	108.67	14.33	85.33	17.67	4.98	3.96	4.65	0.27	0.48	0.85	2.9	2.26	4.31	0.79	0.31	0.71	128	88	110	6	13	24	76	56	124	25	9	19
BnaA01g13720D	11.24	0.71	7.41	0.8	233.94	16	173.64	20.33	11.42	12.63	9.68	0.67	0.76	0.69	6.43	6.48	9.31	0.87	0.8	0.72	256.4	245.41	200	13	18	17	147	140.06	233.87	24	20	17
BnaA01g13730D	0.74	0.45	0.73	0.61	17.51	11.84	18.74	17.24	0.92	0.58	0.71	0.34	0.4	0.62	0.8	0.91	0.47	0.44	0.79	0.6	23.21	12.77	16.54	7.4	10.77	17.34	20.56	22.23	13.42	13.76	22.12	15.83
BnaA01g13740D	0.33	0.21	0.1	0.09	8.7	6.12	3.01	2.73	0.24	0.48	0.27	0.16	0.27	0.19	0.1	0.15	0.06	0	0.09	0.17	7	12	7.1	4	8.37	6	3	4.03	2.01	0	3	5.18
BnaA01g13750D	0.86	0.43	0.57	0.18	7.67	4.33	5.67	2	0.62	1.19	0.78	0.24	0.58	0.47	0.61	0.54	0.55	0.25	0.09	0.2	6	10	7	2	6	5	6	5	6	3	1	2
BnaA01g13760D	7.84	1.25	9.62	4.14	332.8	58.05	450.87	212.04	7.75	6.8	8.97	1.09	1.25	1.4	9.11	10.82	8.92	3.53	4.52	4.36	353.58	268.19	376.62	43	60.66	70.5	422.7	474.98	454.93	198.58	229.42	208.12
BnaA01g13770D	13.69	1.81	11.37	1.72	123.33	18.33	113.33	19	13.08	13.57	14.43	0.84	2.43	2.15	12.65	11.88	9.58	1.75	2.13	1.28	127	114	129	7	25	23	125	111	104	21	23	13
BnaA01g13780D	11.15	3.65	8.51	6.37	331.69	116.5	281.91	230.54	10.6	10.64	12.21	4.34	3.32	3.3	8.22	8.44	8.86	5.94	7.21	5.96	339.8	295	360.28	120	113	116.49	268	260.24	317.49	234.61	257	200
BnaA01g13790D	0.03	0	0	0.06	0.33	0	0	1	0	0.09	0	0	0	0	0	0	0	0.12	0.07	0	0	1	0	0	0	0	0	0	0	2	1	0
BnaA01g13800D	10.95	11.9	10.11	10.02	373.18	442.87	383.5	418.67	10.97	11.75	10.14	10.98	13.3	11.42	9.91	10.24	10.18	11.3	9.45	9.3	403.17	373.37	343	348	518.62	462	370.5	362	418	512	386	358
BnaA01g13810D	7.32	0.17	0.55	0.27	76	1.67	6.33	3.33	7.25	11.65	3.07	0.51	0	0	0	1.1	0.55	0.07	0.16	0.59	82	114	32	5	0	0	0	12	7	1	2	7
BnaA01g13820D	0.84	0.34	0.17	0.46	15.33	6.97	3.33	10.33	0.92	0.94	0.66	0.18	0.33	0.51	0.25	0.11	0.14	0.62	0.32	0.44	18	16	12	3	6.92	11	5	2	3	15	7	9
BnaA01g13830D	14.85	9.81	13.93	13.24	401.55	286.84	416.77	437.98	13.62	16.45	14.49	11.03	8.5	9.89	11.89	17.81	12.09	13.16	13.45	13.12	398.48	416.16	390	278.36	263.76	318.41	354	501.09	395.21	474.69	437.25	402
BnaA01g13840D	0	0	0	0	0	0	0	0	0	0	0	0	0	0	0	0	0	0	0	0	0	0	0	0	0	0	0	0	0	0	0	0
BnaA01g13850D	27.28	17.24	10.74	20.83	508.33	348.67	224	471.67	28.22	27.44	26.17	17.23	16.96	17.53	10	9.59	12.62	20.67	19.69	22.14	566	476	483	298	361	387	204	185	283	511	439	465
BnaA01g13860D	43.16	2.09	24.73	2.7	764.55	41.46	490.32	58	40.16	46.43	42.88	1.45	1.43	3.39	23.71	24.05	26.44	2.24	2.77	3.09	769	769	755.65	23.96	29	71.43	462	443	565.95	53	59	62
BnaA01g13870D	5.93	3.31	8.29	9.81	48.33	30	75.36	97.67	6.81	8.01	2.96	2.63	2.25	5.05	5.7	9.92	9.24	9.76	9.6	10.08	60	61	24	20	21	49	51.08	84	91	106	94	93
BnaA01g13880D	49.44	21.36	20.72	27.51	678.93	324.22	320.07	461.59	49.74	62.41	36.18	17.42	24.37	22.3	5.6	27.86	28.71	26.63	27.66	28.24	739.44	802.41	494.95	223.35	384.43	364.89	84.69	398.46	477.06	488	457.04	439.72
BnaA01g13890D	5.61	2.88	3.53	2.14	180.03	101.12	124.84	84.8	5.53	5.32	5.97	2.52	3.74	2.39	2.62	4.69	3.27	2.64	2.37	1.41	191.08	159	190	75.13	137.24	91	92.06	156	126.46	112.39	91	51
BnaA01g13900D	0.89	0.65	0.68	0.54	29.56	23.33	24.55	21.26	1.12	0.9	0.64	0.6	0.73	0.61	0.69	0.84	0.5	0.32	0.67	0.62	39.83	27.85	21	18.45	27.51	24.03	25.05	28.82	19.79	14.09	26.47	23.22
BnaA01g13910D	13.33	8.62	15.34	8.59	520.78	366.33	671.77	410.16	12.85	14.77	12.38	8.72	8.76	8.37	10.9	16.77	18.36	8.63	8.79	8.35	542.38	539	480.97	317.55	392.44	389	467.99	680.85	866.46	449.15	412.16	369.16
BnaA01g13920D	3.41	1.57	3.91	1.17	137.15	67.6	173.79	57.73	3.28	3.11	3.85	1.92	1.31	1.49	3.27	4.66	3.79	1.04	1.81	0.67	141.81	116.4	153.24	71.77	60.1	70.93	143.97	194.06	183.35	55.42	87.34	30.43
BnaA01g13930D	12.25	6.98	11.84	6.32	315	195.47	336.82	197.31	13.85	11.86	11.03	6.53	6.01	8.4	11.83	12.19	11.51	6.09	7.17	5.71	382	283	280	155.4	176	255	332	323.47	355	207	219.92	165
BnaA01g13940D	3.57	3.6	4.29	3.55	188.67	208.85	253.74	229.99	3.13	3.64	3.93	3.34	3.46	4	4.16	4.33	4.39	3.52	4.03	3.1	179	180	207	164.97	209.93	251.64	242	238.22	281	248.02	255.95	186
BnaA01g13950D	75.84	0.25	38.15	0.99	1260.1	4.67	710.75	20.33	69.22	99.92	58.37	0.13	0.42	0.2	3.81	60.78	49.86	1.08	0.95	0.95	1249.95	1560.45	969.91	2	8	4	70	1055.82	1006.42	24	19	18
BnaA01g13960D	0.49	0.21	0.68	0.18	23.32	10.67	36.18	10.67	0.45	0.54	0.49	0.23	0.2	0.19	0.53	0.84	0.68	0.2	0.26	0.07	23	23.96	23	10	11	11	28	41.69	38.84	13	15	4
BnaA01g13970D	5.54	7.79	9.76	7.19	79.66	125.33	156.67	125.67	5.76	4.94	5.91	4.13	10.25	9	8.84	9.02	11.41	7.35	6.87	7.36	88.98	66	84	55	168	153	139	134	197	140	118	119
BnaA01g13980D	0.97	0.1	1.09	0.23	22.51	2.77	29.01	6.18	0.44	1.09	1.38	0.05	0.07	0.19	1.41	0.62	1.25	0.07	0.07	0.54	11.23	24	32.3	1.05	2	5.26	36.48	15.14	35.42	2.12	2.03	14.4
BnaA01g13990D	2.22	0.88	2.82	0.86	70.4	30.76	99.33	32.47	2.14	2.23	2.29	0.77	0.92	0.96	2.64	3.07	2.75	0.57	0.84	1.16	73.21	66	72	22.86	33.43	36	92	101	105	24	32	41.41
BnaA01g14000D	2.38	1.96	2.48	1.14	58.14	52.18	67.34	33.96	2.46	2.69	1.98	1.88	2.07	1.93	3.07	2.31	2.07	1.21	0.63	1.59	64.99	61.42	48	42.65	57.96	55.94	82.34	58.56	61.12	39.43	18.61	43.84
BnaA01g14010D	0	0	0	0	0	0	0	0	0	0	0	0	0	0	0	0	0	0	0	0	0	0	0	0	0	0	0	0	0	0	0	0
BnaA01g14020D	0.59	0.92	0.84	1.47	8	14	12.33	24	0.62	0.32	0.82	0.56	0.71	1.49	0.81	1.28	0.43	1.28	1.23	1.9	9	4	11	7	11	24	12	18	7	23	20	29
BnaA01g14030D	1.04	0.57	0.86	0.47	28.73	17.03	26	15.84	1.18	0.88	1.07	0.52	0.16	1.02	1.37	0.56	0.64	0.51	0.49	0.42	34.79	22.39	29	13.09	5	33	41	16	21	18.52	16	13
BnaA01g14040D	4.75	2.86	5.53	3.37	330.66	217.55	427.65	286.35	4.29	5.15	4.82	2.71	3.05	2.81	5.56	6.13	4.91	3.15	3.72	3.23	322.82	335.51	333.66	176.25	243.73	232.66	425.68	443.84	413.42	292.22	311.76	255.07
BnaA01g14050D	29.65	27.92	30.76	43.88	1156.44	1188.94	1332.43	2071.33	27.25	30.65	31.05	27.1	27.42	29.23	32.42	32.34	27.52	33.26	53.23	45.15	1148.33	1117	1204	985	1226	1355.83	1390	1311	1296.29	1728	2493	1993
BnaA01g14060D	3.85	5.27	5.21	2.91	30.67	45	45.67	27.67	4.69	3.93	2.93	6.11	3.53	6.17	5.87	5.24	4.51	2.19	2.95	3.58	40	29	23	45	32	58	51	43	43	23	28	32
BnaA01g14070D	0.05	0.01	0.07	0.02	1.33	0.33	2	0.67	0.08	0.04	0.04	0	0.04	0	0.11	0	0.1	0.06	0	0	2	1	1	0	1	0	3	0	3	2	0	0
BnaA01g14080D	18.13	2.05	0.9	1.22	268	31	15.33	22.33	20.64	19.79	13.95	3.72	0.95	1.49	1.18	0	1.52	1.79	0.85	1.02	328	272	204	51	16	26	19	0	27	35	15	17
BnaA01g14090D	3.32	1.15	2.31	1	55	21.33	42.33	20	3.89	2.94	3.13	0.65	1.17	1.64	2.05	2.52	2.37	0.82	1.32	0.86	69	45	51	10	22	32	37	43	47	18	26	16
BnaA01g14100D	22.67	13.67	20.92	11.91	902.4	590.76	924.99	576.95	22.77	22.35	22.9	13.5	14.21	13.29	21.47	20.87	20.43	12.24	10.99	12.49	975.92	828.26	903.01	499.01	646.2	627.08	936.11	860.37	978.48	646.74	523.53	560.59
BnaA01g14110D	2.71	1.63	2.75	0.52	53.3	35.28	58.4	12.3	3.13	1.88	3.12	1.06	1.72	2.11	3.11	3.42	1.71	0.54	0.43	0.59	65.63	34.08	60.2	19.14	38.16	48.55	66.17	68.99	40.05	14	9.91	13
BnaA01g14120D	54.9	26.43	29.87	25.16	1045.74	546.96	632.53	583.04	50.82	51.31	62.58	27.7	19.09	32.5	31.9	29.23	28.49	24.8	23.75	26.94	1043.54	911.19	1182.48	490.43	415.94	734.52	666.39	577.39	653.81	627.86	541.92	579.34
BnaA01g14130D	5.17	0.8	3.75	0.21	128.21	21.67	100.76	6.33	5.68	3.46	6.36	0.74	0.78	0.89	2.94	5.67	2.65	0.12	0.27	0.25	150.36	79.26	155	17	22	26	79.26	144.5	78.53	4	8	7
BnaA01g14140D	0	0	0.02	0	0	0	0.67	0	0	0	0	0	0	0	0	0.05	0	0	0	0	0	0	0	0	0	0	0	2	0	0	0	0
BnaA01g14150D	6.13	5.12	3.73	2.27	135.97	122.96	91.33	60.93	7.22	4.84	6.33	4.8	4.69	5.87	3.36	3.78	4.04	2.09	2.96	1.77	170.9	99	138	98	117.89	153	81	86	107	61	77.8	44
BnaA01g14160D	6.2	4.48	4.4	3.24	86.2	69.06	68	55.4	5.79	5.48	7.33	3.18	5	5.26	3.79	4.72	4.68	3.38	4.74	1.59	86.61	71	100.98	41	79.45	86.72	57.75	67.92	78.33	62.33	78.86	25
BnaA01g14170D	13.7	24.1	13.93	28.48	186.41	353.77	209.19	469.77	16.08	11.69	13.32	23.61	24.45	24.24	14.53	13.42	13.84	30.13	28.84	26.46	233.88	147.04	178.3	296.07	377.26	387.98	214.93	187.65	224.99	540.27	466.07	402.97
BnaA01g14180D	27.37	20.88	18.26	16.03	619.52	511.59	460.84	445.44	27.77	28.65	25.7	21.97	20.18	20.5	19.04	16.99	18.76	18.65	15.06	14.37	677.33	604.39	576.83	462.16	522.36	550.26	472.43	398.65	511.43	560.93	408.33	367.05
BnaA01g14190D	7.53	2.91	6.08	2.51	211.41	90.33	187.27	84.67	8.18	6.37	8.05	2.01	2.73	3.99	6.49	6.69	5.06	2.43	2.1	2.99	246	165.54	222.7	52	87	132	198.46	193.36	170	90	70	94
BnaA01g14200D	4.37	3.07	3.39	2.75	171.71	131.24	147.73	132.19	3.78	4.17	5.15	3.25	2.76	3.21	3.94	3.55	2.68	2.67	3.21	2.36	160.5	153.2	201.43	119.23	124.35	150.15	170.5	145.25	127.43	139.87	151.7	105.01
BnaA01g14210D	0	0	0	0	0	0	0	0	0	0	0	0	0	0	0	0	0	0	0	0	0	0	0	0	0	0	0	0	0	0	0	0
BnaA01g14220D	0	0	0	0	0	0	0	0	0	0	0	0	0	0	0	0	0	0	0	0	0	0	0	0	0	0	0	0	0	0	0	0
BnaA01g14230D	0	0	0	0	0	0	0	0	0	0	0	0	0	0	0	0	0	0	0	0	0	0	0	0	0	0	0	0	0	0	0	0
BnaA01g14240D	8.95	4.19	5.81	10.23	306.73	151.66	221.86	426.36	8.67	8	10.17	5.73	3.68	3.17	6.31	5.2	5.93	10.25	10.05	10.38	319.75	255.32	345.13	182.22	144.19	128.58	236.85	184.35	244.38	466.03	411.97	401.08
BnaA01g14250D	1.81	2.7	2.31	3.57	39.67	62.66	56.33	94.9	2	1.72	1.71	3.45	2.84	1.81	1.92	2.43	2.58	3.48	3.63	3.61	47	35	37	70	70.99	47	46	55	68	100.85	94.85	89
BnaA01g14260D	0.05	0.11	0	0.11	0.67	1.67	0	2	0	0	0.14	0.15	0.06	0.11	0	0	0	0.15	0.11	0.06	0	0	2	2	1	2	0	0	0	3	2	1
BnaA01g14270D	24.45	10.08	11.87	10.08	351.67	151.67	191.67	178	25.03	22.88	25.44	14.92	7.56	7.76	13.28	8.34	14	12.22	9.13	8.89	387	306	362	199	124	132	209	124	242	233	157	144
BnaA01g14280D	0	0	0	0	0	0	0	0	0	0	0	0	0	0	0	0	0	0	0	0	0	0	0	0	0	0	0	0	0	0	0	0
BnaA01g14290D	6.28	3.96	5.86	3.51	96.33	65	99.67	64.67	6.27	4.37	8.21	4.52	2.87	4.48	7.96	4.24	5.39	2.77	4.33	3.43	103	62	124	64	50	81	133	67	99	56	79	59
BnaA01g14300D	13.69	7.99	15.39	7.55	269.25	170.9	335.12	179.46	14.94	12.69	13.45	7.5	7.56	8.92	15.72	15.31	15.15	7.42	6.79	8.43	315.17	231.52	261.05	136.37	169.22	207.1	337.36	310.67	357.34	192.91	159.3	186.18
BnaA01g14310D	11.04	8.1	6.81	5.75	240.86	193.63	162.95	149.36	13.23	10.18	9.7	6.19	9.32	8.78	7.4	7.3	5.73	4.72	4.24	8.28	308.75	205.51	208.31	124.56	230.79	225.53	175.57	163.86	149.42	135.71	109.94	202.43
BnaA01g14320D	0.59	16.36	0.43	15.11	7	204.33	5.67	218.25	0.63	0.63	0.51	23.85	10.17	15.07	1	0.08	0.21	16.1	11.47	17.77	8	7	6	263	138	212	13	1	3	253.73	163.01	238.01
BnaA01g14330D	3.59	1.94	3.9	1.97	138.71	83.39	165.49	92.65	3.46	3.35	3.95	1.28	2.32	2.22	4.28	4.55	2.86	1.88	2.21	1.81	144.1	120.53	151.51	45.95	102.56	101.66	181.15	182.12	133.21	96.71	102.2	79.04
BnaA01g14340D	5.26	0.47	8.04	0.51	76.33	7.67	129.05	9	4.58	5.73	5.46	0.29	0.48	0.64	10.87	8.14	5.12	0.62	0.23	0.67	72	78	79	4	8	11	174	123.15	90	12	4	11
BnaA01g14350D	9.8	4.87	11.7	5.59	175	95.45	232.56	122.18	9.79	9.77	9.84	3.91	6.16	4.53	10.64	12.14	12.31	6.11	5.46	5.21	188.38	162.47	174.14	64.88	125.65	95.81	208.22	224.7	264.76	144.83	116.74	104.97
BnaA01g14360D	0	0.04	0	0.28	0	0.67	0	6	0	0	0	0.07	0.05	0	0	0	0	0.59	0.1	0.16	0	0	0	1	1	0	0	0	0	13	2	3
BnaA01g14370D	0.49	0.59	1.08	0.3	4	5	10	3	0.23	0.39	0.86	0.92	0.54	0.31	1.23	0.59	1.42	0.37	0	0.54	2	3	7	7	5	3	11	5	14	4	0	5
BnaA01g14380D	62.75	6.41	8.84	1.45	1244.24	143.59	197.71	34.82	59.57	82.39	46.3	2.84	11.9	4.49	4.28	10.66	11.59	1.09	1.82	1.43	1282.06	1533.64	917.01	52.64	271.77	106.36	93.69	220.72	278.73	28.87	43.43	32.15
BnaA01g14390D	0	0	0	0	0	0	0	0	0	0	0	0	0	0	0	0	0	0	0	0	0	0	0	0	0	0	0	0	0	0	0	0
BnaA01g14400D	33.36	27.68	23.4	33.19	394.47	359.67	302.67	468.33	39.32	25.39	35.36	21.05	21.59	40.41	26.96	24.31	18.94	26.17	35.02	38.38	496	277	410.41	229	289	561	346	295	267	407	491	507
BnaA01g14410D	0.62	0.98	0.04	0.48	19.67	30.76	1.33	18.71	1.02	0.52	0.33	1.91	0.63	0.41	0.09	0.03	0	0.75	0.28	0.42	34	15	10	55	22.27	15	3	1	0	31	10.3	14.84
BnaA01g14420D	128.74	28.64	107.59	30.01	2445	598.25	2257.58	678.69	140.54	109.5	136.17	23.13	21.65	41.14	127.14	97.09	98.55	19.42	33.86	36.76	2859.12	1926.67	2549.21	405.84	467.5	921.4	2631.69	1900	2241.06	487	765.72	783.36
BnaA01g14430D	18.76	14.48	18.35	14.31	337.65	282.73	366.96	313.12	19.34	19.74	17.2	15.12	12.04	16.28	19.94	17.65	17.46	13.2	15.79	13.95	374.94	331.08	306.92	252.88	247.81	347.51	393.45	329.1	378.32	315.65	340.39	283.33
BnaA01g14440D	0.03	0	0	0	0.33	0	0	0	0.08	0	0	0	0	0	0	0	0	0	0	0	1	0	0	0	0	0	0	0	0	0	0	0
BnaA01g14450D	129.78	80.88	81.62	65.5	2759.23	1793.36	1938.48	1719.08	126.68	126.32	136.35	125.33	58.58	58.72	76.26	77.9	90.69	84.07	58.57	53.85	2901.51	2502.26	2873.91	2475.81	1423.9	1480.37	1777.14	1716.31	2322	2373.97	1491.24	1292.02
BnaA01g14460D	1.47	0.24	0.49	0.1	38.33	6.33	14.33	3.33	1.49	1.61	1.32	0.45	0.1	0.16	0.59	0.44	0.45	0.17	0.03	0.1	41.99	39	34	11	3	5	17	12	14	6	1	3
BnaA01g14470D	84.32	59.84	96.22	60.93	1369.46	1050.07	1735.14	1208.11	84.68	84.64	83.63	63.85	58.38	57.29	101.33	95.86	91.47	64.71	57.94	60.14	1481.44	1280.66	1346.27	963.29	1083.75	1103.16	1803.58	1613.07	1788.78	1395.73	1126.6	1102.01
BnaA01g14480D	0.02	0	0	0	0.33	0	0	0	0.07	0	0	0	0	0	0	0	0	0	0	0	1	0	0	0	0	0	0	0	0	0	0	0
BnaA01g14490D	0.53	0.04	0.27	0.06	10.39	1	6.04	1.33	0.28	0.23	1.07	0	0	0.13	0.41	0.15	0.25	0	0.13	0.04	6	4.16	21	0	0	3	9	3.11	6	0	3	1
BnaA01g14500D	0	0	0	0	0	0	0	0	0	0	0	0	0	0	0	0	0	0	0	0	0	0	0	0	0	0	0	0	0	0	0	0
BnaA01g14510D	1.38	2.47	1.02	0.83	27.67	52.81	22.67	19.85	1.68	1.19	1.27	2.81	2.35	2.25	0.92	0.92	1.21	0.73	0.76	0.99	36	22	25	52	53.43	53	20	19	29	19.27	18.04	22.24
BnaA01g14520D	22.25	6.5	11.91	3.69	472.41	154.56	280.68	95.14	23.08	23.34	20.32	3.72	7.83	7.95	11.72	12.54	11.47	3.43	3.79	3.86	527.78	461.71	427.74	73.34	190.07	200.26	272.79	275.97	293.27	96.7	96.23	92.49
BnaA01g14530D	2.16	0.94	1.65	0.59	38	18.67	32.43	12.67	1.46	2.53	2.49	0.67	0.79	1.37	1.54	1.9	1.51	0.47	0.7	0.6	27.99	42	44	11	16	29	30	35	32.3	11	15	12
BnaA01g14540D	0	0	0	0	0	0	0	0	0	0	0	0	0	0	0	0	0	0	0	0	0	0	0	0	0	0	0	0	0	0	0	0
BnaA01g14550D	0	0	0	0	0	0	0	0	0	0	0	0	0	0	0	0	0	0	0	0	0	0	0	0	0	0	0	0	0	0	0	0
BnaA01g14560D	1.07	0.44	1.69	0.35	15	7	27.33	6	0.78	2.02	0.42	0.23	0.43	0.65	1.47	1.28	2.32	0.26	0.29	0.5	12	27	6	3	7	11	23	19	40	5	5	8
BnaA01g14570D	22.51	13.89	16.33	8.82	481.33	327	389.33	230	23.24	23	21.29	11.28	14.2	16.18	16.56	15.17	17.25	8.95	9.46	8.04	535	458	451	224	347	410	388	336	444	254	242	194
BnaA01g14580D	0	0	0	0	0	0	0	0	0	0	0	0	0	0	0	0	0	0	0	0	0	0	0	0	0	0	0	0	0	0	0	0
BnaA01g14590D	2.42	1.29	1.13	0.81	77	43.67	40	32	1.87	3.03	2.35	1.94	0.62	1.31	1.5	1.14	0.75	0.89	0.88	0.66	65	91	75	58	23	50	53	38	29	38	34	24
BnaA01g14600D	0.34	0.03	0.56	0.07	11.67	1	21.05	3	0.47	0.38	0.18	0.06	0	0.02	0.35	0.82	0.52	0.09	0	0.13	17	12	6	2	0	1	13	29	21.15	4	0	5
BnaA01g14610D	0	0	0	0	0	0	0	0	0	0	0	0	0	0	0	0	0	0	0	0	0	0	0	0	0	0	0	0	0	0	0	0
BnaA01g14620D	0	0	0	0	0	0	0	0	0	0	0	0	0	0	0	0	0	0	0	0	0	0	0	0	0	0	0	0	0	0	0	0
BnaA01g14630D	0	0	0	0	0	0	0	0	0	0	0	0	0	0	0	0	0	0	0	0	0	0	0	0	0	0	0	0	0	0	0	0
BnaA01g14640D	5.16	1.15	3.83	0.63	71.2	17.72	58.71	10.59	5.2	4.42	5.87	0.7	0.84	1.9	4.83	3.06	3.6	0.69	0.51	0.7	77	56.61	80	9	13.19	30.97	72.86	43.65	59.62	12.58	8.34	10.86
BnaA01g14650D	1.01	0.49	0.76	0.23	25.33	13.33	21.43	7.16	1	0.81	1.21	0.51	0.52	0.44	1.07	0.5	0.72	0.3	0.17	0.23	27	19	30	12	15	13	29.51	13	21.79	10	5	6.47
BnaA01g14660D	2.77	1.56	2.23	2.41	42.59	26.17	38.35	45.71	2.49	3.89	1.94	1.65	1.65	1.38	2.04	2.55	2.11	2.62	1.96	2.66	41.7	56.22	29.85	23.8	29.28	25.44	34.64	41	39.4	54	36.44	46.69
BnaA01g14670D	0	0	0	0	0	0	0	0	0	0	0	0	0	0	0	0	0	0	0	0	0	0	0	0	0	0	0	0	0	0	0	0
BnaA01g14680D	0.03	0.18	0.12	0	0.33	1.67	1.33	0	0	0	0.1	0.55	0	0	0.09	0.1	0.17	0	0	0	0	0	1	5	0	0	1	1	2	0	0	0
BnaA01g14690D	0.56	0.62	1.69	0.06	8.03	9.33	26.67	1	1.15	0.31	0.22	0.54	0.82	0.49	1.65	0.77	2.64	0	0.06	0.13	17.09	4	3	7	13	8	25	11	44	0	1	2
BnaA01g14700D	0.3	0.04	0.35	0.15	2.67	0.33	3.24	1.58	0.67	0	0.24	0.13	0	0	0.41	0.23	0.4	0.18	0.28	0	6	0	2	1	0	0	3.73	2	4	2	2.73	0
BnaA01g14710D	4.25	1.85	2.83	1.17	106.52	49.55	80.4	36.15	3.26	4.08	5.4	2.39	2.15	1.02	2.96	2.01	3.51	1.26	1.16	1.1	88.54	96	135.02	56	62	30.66	82	52.44	106.75	42.14	35	31.32
BnaA01g14720D	5.37	7.9	4.13	5.31	143.09	233.1	121.74	173.49	5.84	5.88	4.38	5.48	10.94	7.29	3.62	4.82	3.94	6.3	4.25	5.39	167.67	146	115.61	135.73	333.28	230.29	105.84	133.07	126.3	222.83	135.64	162
BnaA01g14730D	5.9	25.64	2.77	27.96	212	969.84	110.04	1231.78	4.8	6.26	6.64	38.58	20.53	17.81	3.33	3.12	1.86	28.66	25.81	29.42	187	211	238	1296.53	849	764	132	117	81.12	1377.02	1117.62	1200.7
BnaA01g14740D	1.89	0.79	1.83	0.83	93.34	42.75	101.39	50.82	1.55	2.33	1.8	0.73	0.91	0.73	1.89	1.74	1.85	0.79	1.14	0.57	83	108.26	88.75	33.63	51.61	43.01	103.4	89.78	111	52.46	68	32
BnaA01g14750D	76.65	71.68	53.97	60.49	1770.78	1799.62	1383.13	1706.48	78.22	73.73	78.01	70.4	67.19	77.44	53.62	55.4	52.89	66.02	57.65	57.79	1943.79	1584.56	1784	1508.77	1771.86	2118.22	1355.82	1324.27	1469.3	2022.69	1592.34	1504.4
BnaA01g14760D	0	0	0	0	0	0	0	0	0	0	0	0	0	0	0	0	0	0	0	0	0	0	0	0	0	0	0	0	0	0	0	0
BnaA01g14770D	0.16	0.01	0.07	0.02	5	0.33	2.67	0.67	0.09	0.2	0.19	0.03	0	0	0.03	0	0.18	0	0.05	0	3	6	6	1	0	0	1	0	7	0	2	0
BnaA01g14780D	0	0	0	0	0	0	0	0	0	0	0	0	0	0	0	0	0	0	0	0	0	0	0	0	0	0	0	0	0	0	0	0
BnaA01g14790D	6.25	3.05	5.99	2.63	104.74	56.44	111.71	53.93	4.89	6.82	7.05	2.67	2.92	3.55	7.41	6.02	4.55	2.53	2.68	2.67	88.93	107.28	118.01	41.85	56.44	71.03	137.11	105.42	92.59	56.75	54.24	50.8
BnaA01g14800D	0	0	0.02	0	0	0	0.33	0	0	0	0	0	0	0	0	0.07	0	0	0	0	0	0	0	0	0	0	0	1	0	0	0	0
BnaA01g14810D	0	0	0	0	0	0	0	0	0	0	0	0	0	0	0	0	0	0	0	0	0	0	0	0	0	0	0	0	0	0	0	0
BnaA01g14820D	0	0	0	0	0	0	0	0	0	0	0	0	0	0	0	0	0	0	0	0	0	0	0	0	0	0	0	0	0	0	0	0
BnaA01g14830D	0	0	0	0.02	0	0	0	0.33	0	0	0	0	0	0	0	0	0	0.05	0	0	0	0	0	0	0	0	0	0	0	1	0	0
BnaA01g14840D	1.14	0.94	1.4	0.82	37.23	34	50.33	33.44	1.14	0.91	1.36	0.6	1.5	0.73	1.15	1.69	1.35	1.19	0.92	0.35	40	27.7	44	18	56	28	41	57	53	51.31	36	13
BnaA01g14850D	19.85	15.51	18.64	11.46	499.57	419.58	525.53	353.74	18.02	19.4	22.12	18.78	10.33	17.41	13.22	20.2	22.49	12.36	11.63	10.4	489.7	456	553	440	298	520.73	365.59	528	683	414	351.22	296
BnaA01g14860D	31.09	25.96	24.86	19.54	602.81	554.9	533.48	460.12	32.7	30.07	30.51	18.5	36.1	23.27	27.48	24.43	22.66	20.69	15.69	22.24	681.44	542	585	332.47	798.35	533.87	582.73	489.77	527.94	531.48	363.34	485.55
BnaA01g14870D	6.69	7.41	7.95	7.33	191.28	229.71	249.19	251.41	5.93	4.81	9.33	7.6	5.78	8.84	6.12	11.02	6.7	5.19	8.63	8.16	182.14	127.87	263.84	201.44	188.52	299.18	191.39	325.92	230.26	196.84	294.69	262.7
BnaA01g14880D	36.15	49.35	39.64	36.32	1038.6	1524.48	1258.52	1268.5	37.26	35.32	35.86	55.02	47.69	45.34	43.49	41.1	34.32	35.23	38.09	35.65	1151.57	944.13	1020.09	1466.76	1564.16	1542.51	1367.72	1221.96	1185.87	1342.74	1308.47	1154.3
BnaA01g14890D	0.16	0.08	0.17	0.13	2.33	1.33	2.71	2.33	0.26	0	0.21	0.07	0	0.17	0.19	0.14	0.17	0.21	0.17	0	4	0	3	1	0	3	3	2.12	3	4	3	0
BnaA01g14900D	57.96	75	30.59	57.79	730.55	1027.84	430.98	892.29	53.17	63.76	56.94	75.02	92.54	57.43	30.27	30.41	31.1	62.69	47.64	63.05	725.07	752	714.57	882.34	1339.13	862.06	420	398.9	474.03	1054.08	722.14	900.64
BnaA01g14910D	3.78	2.71	3.46	1.4	56	44	56.81	25.59	3.69	3.69	3.95	2.61	1.53	3.98	3.69	3.54	3.14	1.82	1.41	0.96	59	51	58	36	26	70	60	54.44	56	35.77	25	16
BnaA01g14920D	17.62	26.9	13.36	21.05	199.91	327.22	168.78	289.02	19.54	17.79	15.52	30.18	27.18	23.33	14.67	11.43	13.98	19.46	21.93	21.75	238.11	187.53	174.09	317.18	351.48	313	181.91	134	190.44	292.42	297	277.65
BnaA01g14930D	3.07	5.6	1.8	3.04	13.67	27	8.69	16.67	4.46	2.21	2.54	4.18	8	4.63	2.71	1.54	1.15	4.99	2.1	2.03	21	9	11	17	40	24	13	7	6.08	29	11	10
BnaA01g14940D	1.79	20.1	2.29	14.66	33	404.8	46.67	333.26	1.5	1.96	1.9	21.39	18.38	20.53	3.33	2.33	1.2	15.14	15.47	13.36	30	34	35.01	369.89	391.25	453.25	68	45	27	374.43	344.8	280.56
BnaA01g14950D	13.72	5.26	6.73	2.66	263.1	109.76	143.08	61.42	14.88	12.73	13.54	5.05	4.33	6.4	7.88	5.86	6.44	2.3	2.49	3.2	306.19	226.6	256.52	89.62	94.65	145.02	165	116	148.23	58.27	56.99	69
BnaA01g14960D	23.54	8.93	12.27	7.55	353.92	147.45	203.73	136.75	22.17	20.61	27.85	7.63	7.98	11.17	16.11	11.3	9.4	6.34	7.05	9.27	358.72	288.45	414.59	106.51	136.95	198.89	265.23	175.89	170.08	126.45	126.75	157.04
BnaA01g14970D	0.01	0	0.02	0.01	0.33	0	0.67	0.33	0	0	0.04	0	0	0	0	0.07	0	0	0.03	0	0	0	1	0	0	0	0	2	0	0	1	0
BnaA01g14980D	0.04	0.47	0.31	0.5	1.02	12.88	9.23	15.08	0	0.13	0	0.31	0.34	0.75	0.14	0	0.8	0.39	0.53	0.59	0	3.05	0	7.06	9.56	22.03	3.85	0.01	23.84	12.91	15.73	16.61
BnaA01g14990D	4.02	4.64	2.74	2.27	126.69	154.12	95.05	86.38	4.33	4.62	3.12	6.6	3.3	4.01	3.64	2.76	1.83	1.95	2.21	2.65	146.93	135.56	97.58	193.35	119	150	125.72	90	69.43	81.66	83.22	94.26
BnaA01g15000D	7.08	0.7	4.85	0.77	115.12	11.34	86.43	15.39	8.66	5.69	6.88	1.4	0.44	0.26	0.41	8.04	6.09	1.21	0.58	0.51	150.13	85.38	109.86	21	8.03	5	7.26	134.05	117.99	25.79	11.12	9.25
BnaA01g15010D	7.35	3.57	10.35	1.5	101.14	52.9	154.27	24.37	8.53	5.09	8.44	3.8	1.74	5.18	16.8	9.27	4.97	1.21	0.75	2.54	125.08	64.51	113.84	48	27.08	83.61	250.66	130.7	81.44	21.88	12.24	39
BnaA01g15020D	0.46	0.07	0.51	0.04	11	1.67	13.33	1.33	0.46	0.49	0.42	0.13	0	0.07	0.45	0.8	0.27	0.03	0.1	0	12	11	10	3	0	2	12	20	8	1	3	0
BnaA01g15030D	0	0	0	0	0	0	0	0	0	0	0	0	0	0	0	0	0	0	0	0	0	0	0	0	0	0	0	0	0	0	0	0
BnaA01g15040D	2.37	8.4	3.79	3.13	48.33	183.8	86.33	79.52	2.18	2.72	2.22	10.12	8.64	6.44	4.14	3.49	3.73	3.97	3.42	2.01	48	52	45	192.69	202.24	156.46	93	74	92	108.14	84	46.42
BnaA01g15050D	0.07	0.11	0	0.03	0.67	1.33	0	0.33	0	0.2	0	0	0.32	0	0	0	0	0	0	0.08	0	2	0	0	4	0	0	0	0	0	0	1
BnaA01g15060D	5.52	1.56	8.41	1.27	243.07	75.29	412.14	68	4.9	5.21	6.45	1.32	2.04	1.32	9.35	7.99	7.89	1.25	1.23	1.33	233	214	282.2	54	103.02	68.86	452	365.47	418.96	73	65	66
BnaA01g15070D	3.87	2.31	3.67	2.32	267.66	175.79	281.96	195.9	3.61	3.99	4	2	2.61	2.33	3.4	4.05	3.55	2.2	2.83	1.92	269.7	258	275.28	129	206.75	191.63	258.66	290.85	296.36	203	234.7	150
BnaA01g15080D	128.34	65.84	45	126.98	2663.93	1462.97	1057.96	3213.67	122.65	149.67	112.7	83.51	53.43	60.58	24.22	45.91	64.86	116.73	133.87	130.33	2754.93	2907.39	2329.48	1617.65	1273.62	1497.65	553.46	991.99	1628.44	3232.65	3342.06	3066.3
BnaA01g15090D	0.06	0	0.06	0.01	1	0	1.33	0.33	0	0.06	0.11	0	0	0	0.05	0	0.14	0.04	0	0	0	1	2	0	0	0	1	0	3	1	0	0
BnaA01g15100D	13.81	8.92	16.54	9.45	225.31	154.67	299.67	186.83	14.22	13.19	14.02	11.37	7.36	8.03	17.42	15.82	16.37	8.88	9.28	10.2	249.49	200.14	226.3	172	137	155	311	267	321	192	181	187.5
BnaA01g15110D	9.41	2.67	6.67	1.85	305.75	94.59	242.61	73.81	9.08	10.98	8.16	2.62	3.14	2.25	6.07	6.87	7.08	2	1.95	1.59	319.23	333.96	264.05	79.37	117.16	87.24	217.08	232.39	278.36	86.49	76.26	58.67
BnaA01g15120D	0.18	0	0.18	0	1.33	0	1.67	0	0	0.53	0	0	0	0	0.11	0.12	0.31	0	0	0	0	4	0	0	0	0	1	1	3	0	0	0
BnaA01g15130D	18.77	5.21	24.67	2.62	1187.73	366.61	1723.49	200.48	18.01	17.25	21.05	3.46	5.5	6.66	26.75	26.62	20.65	1.9	3.63	2.34	1227.09	1016.36	1319.75	203.35	397.33	499.15	1854.1	1744.08	1572.28	159.26	274.87	167.3
BnaA01g15140D	14.25	8.58	27.1	9.56	509.31	336.72	1079.92	419.04	13.53	16.57	12.66	8.17	6.9	10.67	26.39	28.7	26.22	9.93	9.82	8.93	523.13	554.37	450.44	272.62	283.31	454.23	1038.41	1067.85	1133.51	473.29	421.98	361.86
BnaA01g15150D	0.02	0.06	0	0	0.33	1.33	0	0	0	0	0.06	0	0	0.18	0	0	0	0	0	0	0	0	1	0	0	4	0	0	0	0	0	0
BnaA01g15160D	1.05	1.26	0.22	0.21	19.33	26	4.67	4.67	1.12	0.53	1.5	0.41	1.92	1.44	0.05	0.11	0.5	0.17	0.23	0.24	22	9	27	7	40	31	1	2	11	4	5	5
BnaA01g15170D	0	0	0	0	0	0	0	0	0	0	0	0	0	0	0	0	0	0	0	0	0	0	0	0	0	0	0	0	0	0	0	0
BnaA01g15180D	3.58	0.37	1.15	0.43	193.78	21.69	69.47	28.55	3.41	3.43	3.91	0.44	0.12	0.55	1.05	1.24	1.17	0.53	0.35	0.41	198.83	172.69	209.82	22.13	7.34	35.59	62.1	69.79	76.52	37.95	22.51	25.2
BnaA01g15190D	0.01	0	0.01	0	0.2	0	0.14	0	0.03	0	0	0	0	0	0	0.01	0.01	0	0	0	0.6	0	0	0	0	0	0	0.2	0.22	0	0	0
BnaA01g15200D	0	0	0	0	0	0	0	0	0	0	0	0	0	0	0	0	0	0	0	0	0	0	0	0	0	0	0	0	0	0	0	0
BnaA01g15210D	0.04	0	0	0.02	0.67	0	0	0.33	0.11	0	0	0	0	0	0	0	0	0	0.05	0	2	0	0	0	0	0	0	0	0	0	1	0
BnaA01g15220D	0.15	0.19	0.25	0.1	2.67	3.33	4.67	2	0.22	0.06	0.18	0.2	0.11	0.25	0.22	0.17	0.35	0.14	0.05	0.11	4	1	3	3	2	5	4	3	7	3	1	2
BnaA01g15230D	0	0	0	0	0	0	0	0	0	0	0	0	0	0	0	0	0	0	0	0	0	0	0	0	0	0	0	0	0	0	0	0
BnaA01g15240D	0.02	0.07	0.04	0.01	0.33	1.67	1	0.33	0	0	0.05	0	0.2	0	0.08	0.04	0	0.04	0	0	0	0	1	0	5	0	2	1	0	1	0	0
BnaA01g15250D	48.45	157.82	89.64	131.11	1502.08	5266.26	3063.27	4941.11	54.21	51.92	39.21	170.72	164.64	138.1	96.71	97.48	74.73	127.19	142.4	123.74	1806.97	1496.69	1202.59	4907.83	5823.92	5067.04	3279.8	3125.49	2784.51	5226.92	5275.98	4320.42
BnaA01g15260D	0	0	0	0	0	0	0	0	0	0	0	0	0	0	0	0	0	0	0	0	0	0	0	0	0	0	0	0	0	0	0	0
BnaA01g15270D	1.95	0.29	0.56	0.79	76.65	12.19	24.47	38.4	1.66	2.09	2.1	0.35	0.32	0.19	0.45	0.61	0.61	0.85	0.95	0.58	70.66	77	82.28	13	14.56	9	19.27	25	29.14	44.65	44.75	25.81
BnaA01g15280D	4.32	1.59	1.55	1.2	39	15.33	15.33	13	4.66	3.59	4.72	2.04	0.29	2.45	2.24	1.4	1.02	1.26	0.65	1.68	45	30	42	17	3	26	22	13	11	15	7	17
BnaA01g15290D	8.43	2.46	8.07	2.36	267.89	85.79	283.51	90.93	8.52	8.06	8.71	2.18	1.88	3.32	7.05	9.39	7.76	2.14	2.62	2.32	291.34	238.4	273.93	64.27	68.31	124.78	245.28	308.83	296.42	90.15	99.65	83
BnaA01g15300D	16.6	25.23	21.05	20.86	376.22	633.29	529.15	574.13	16.88	16.82	16.1	17.99	30.02	27.68	18.58	23.64	20.93	20.68	18.36	23.54	411.89	355.07	361.69	378.66	777.55	743.66	461.46	555	571	622.39	498.12	601.89
BnaA01g15310D	6.14	12.66	6.62	8.52	200.15	462.52	241.67	341.33	6.07	6.94	5.42	7.05	17.73	13.21	6.28	6.32	7.27	9.84	7.62	8.11	213.78	211.1	175.56	214	662	511.56	225	214	286	427	298	299
BnaA01g15320D	10.53	22.06	31.4	26.17	184.95	427.98	611.29	555.35	10.88	9.81	10.89	16.91	20.29	28.98	38.46	27.6	28.15	22.63	28.74	27.13	205.4	160.19	189.25	275.31	406.41	602.22	738.67	501.21	594	526.63	602.94	536.48
BnaA01g15330D	0.68	0.46	1.08	0.57	25.43	19.31	44.76	25.9	0.69	0.77	0.57	0.36	0.46	0.57	1.2	1.16	0.87	0.47	0.63	0.6	27.89	27	21.39	12.64	20	25.28	49.57	45.36	39.34	23.51	28.62	25.56
BnaA01g15340D	0	0	0	0	0	0	0	0	0	0	0	0	0	0	0	0	0	0	0	0	0	0	0	0	0	0	0	0	0	0	0	0
BnaA01g15350D	0.55	0.46	3.47	0.21	11.33	10.67	79.78	5.33	0.54	0.72	0.39	0.31	0.21	0.85	5.84	2.24	2.32	0.18	0.4	0.04	12	14	8	6	5	21	133	48.35	58	5	10	1
BnaA01g15360D	2.06	1.33	3.26	0.85	24.64	17.33	43.49	12.67	2.26	1.88	2.03	1.26	0.88	1.84	3.48	2.83	3.48	1.33	0.63	0.59	29	20.93	24	14	12	26	45.48	35	50	21	9	8
BnaA01g15370D	0	0	0	0	0	0	0	0	0	0	0	0	0	0	0	0	0	0	0	0	0	0	0	0	0	0	0	0	0	0	0	0
BnaA01g15380D	0	0.01	0	0	0	0.33	0	0	0	0	0	0	0.04	0	0	0	0	0	0	0	0	0	0	0	1	0	0	0	0	0	0	0
BnaA01g15390D	11.2	5.84	8.78	3.93	111.33	63.67	97.67	47.67	10.43	11.52	11.64	5.18	6.58	5.75	10.89	6.88	8.58	3.93	3.77	4.09	112	107	115	48	75	68	119	71	103	52	45	46
BnaA01g15400D	0	0	0	0	0	0	0	0	0	0	0	0	0	0	0	0	0	0	0	0	0	0	0	0	0	0	0	0	0	0	0	0
BnaA01g15410D	4.14	2.31	3	1.64	93.4	56.33	74.67	44.73	3.91	3.95	4.56	2.48	2.25	2.2	2.51	3.89	2.61	1.3	1.59	2.04	95.21	83	102	52	58	59	62	91	71	39.08	43.1	52
BnaA01g15420D	0.11	0	0.45	0	3.64	0	14.77	0	0.33	0	0	0	0	0	0.36	0.82	0.16	0	0	0	10.91	0	0	0	0	0	12.08	26.24	5.98	0	0	0
BnaA01g15430D	0	0	0	0	0	0	0	0	0	0	0	0	0	0	0	0	0	0	0	0	0	0	0	0	0	0	0	0	0	0	0	0
BnaA01g15440D	1.32	0.54	1.26	0.22	9.95	4.33	10.67	2	0.84	0.99	2.12	0.71	0.35	0.55	2.4	0.51	0.87	0	0.66	0	6.85	7	16	5	3	5	20	4	8	0	6	0
BnaA01g15450D	12.97	8.16	10.56	5.9	494.31	340.97	447.3	274.47	12.21	12.5	14.21	7.25	8.21	9.02	12.44	9.71	9.54	6.16	5.41	6.14	501.59	444.25	537.1	257	358.01	407.89	520.09	383.59	438.23	311.92	247.19	264.31
BnaA01g15460D	0	0	0	0	0	0	0	0	0	0	0	0	0	0	0	0	0	0	0	0	0	0	0	0	0	0	0	0	0	0	0	0
BnaA01g15470D	0	0	0	0	0	0	0	0	0	0	0	0	0	0	0	0	0	0	0	0	0	0	0	0	0	0	0	0	0	0	0	0
BnaA01g15480D	0.68	0.05	0.78	0.12	16.67	1.33	21	3.33	0.99	0.75	0.29	0.04	0.04	0.07	1.12	0.75	0.48	0.06	0.07	0.22	26	17	7	1	1	2	30	19	14	2	2	6
BnaA01g15490D	42.63	24.26	32.16	10.79	902.76	557.33	756.49	276.58	39.59	42.52	45.79	26.18	17.65	28.94	42.88	27.19	26.41	9.74	9.19	13.44	904.84	840.45	963	516	428.11	727.89	997.02	597.82	674.62	274.39	233.55	321.8
BnaA01g15500D	3.06	1.61	2.89	1.78	57.84	33.21	60	40.89	3.43	2.63	3.11	1.37	1.66	1.79	2.99	3.19	2.49	1.95	1.63	1.75	69.51	46	58	24	35.63	40	61.58	62.11	56.3	48.66	36.79	37.22
BnaA01g15510D	21.03	8.74	10.32	6.96	337.52	149.38	185.41	136.83	21.09	23.6	18.41	11.53	6.28	8.41	11.84	8.32	10.79	8.28	4.56	8.04	365.41	353.63	293.52	172.27	115.54	160.32	208.67	138.66	208.91	176.81	87.79	145.88
BnaA01g15520D	0	0	0	0	0	0	0	0	0	0	0	0	0	0	0	0	0	0	0	0	0	0	0	0	0	0	0	0	0	0	0	0
BnaA01g15530D	0	0	0	0	0	0	0	0	0	0	0	0	0	0	0	0	0	0	0	0	0	0	0	0	0	0	0	0	0	0	0	0
BnaA01g15540D	0	0	0	0	0	0	0	0	0	0	0	0	0	0	0	0	0	0	0	0	0	0	0	0	0	0	0	0	0	0	0	0
BnaA01g15550D	1.08	41.21	20.37	96.78	12.17	489.3	237.22	1224.79	3.25	0	0	13.21	61.02	49.39	10.48	25.5	25.12	80.58	119.08	90.68	36.51	0	0	128.11	728.27	611.53	119.93	275.94	315.8	1117.4	1488.68	1068.28
BnaA01g15560D	5.03	4.45	4.39	3.56	95.67	92.67	93.33	83.33	4.37	5.56	5.17	4.11	5.76	3.48	3.34	5.1	4.73	3.86	3.54	3.29	90	99	98	73	126	79	70	101	109	98	81	71
BnaA01g15570D	0	0	0	0	0	0	0	0	0	0	0	0	0	0	0	0	0	0	0	0	0	0	0	0	0	0	0	0	0	0	0	0
BnaA01g15580D	0	0	0	0	0	0	0	0	0	0	0	0	0	0	0	0	0	0	0	0	0	0	0	0	0	0	0	0	0	0	0	0
BnaA01g15590D	5.37	5.16	7.92	4.78	220.03	223.38	360.39	237.89	5.3	5.71	5.11	7.36	2.9	5.22	8.66	7.91	7.2	4.36	5.2	4.77	234	218.21	207.87	280.36	135.79	254	389.24	336.08	355.84	237.57	255.33	220.77
BnaA01g15600D	5.05	4.38	4.59	6.52	162	153	164.33	254.67	4.85	5.47	4.83	4.32	4.87	3.96	4.26	4.71	4.8	6.34	5.97	7.25	168	164	154	129	179	151	150	157	186	271	230	263
BnaA01g15610D	1.63	0.68	1.19	0.74	26	12	21.67	14.33	1.45	1.54	1.89	0.6	0.6	0.84	1.71	0.42	1.45	0.66	0.57	0.99	25	23	30	9	11	16	30	7	28	14	11	18
BnaA01g15620D	15.18	6.73	9.68	6.46	303.87	147.33	213	157	15.69	14.98	14.86	6.14	5.86	8.18	11.32	10.67	7.06	6.55	5.39	7.45	338	279	294.6	114	134	194	248	221	170	174	129	168
BnaA01g15630D	17.43	10.36	13.38	4.93	508.94	318.91	437.8	175.29	16.88	20.89	14.52	15.64	5.99	9.46	15.99	11.03	13.12	4.69	4.38	5.71	533.55	571	422.27	426.49	201.04	329.21	514.19	335.48	463.73	182.85	153.99	189.02
BnaA01g15640D	176.66	15.68	175.62	6.31	4847.56	471.14	5380.14	209.2	164.54	201.18	164.27	15.89	10.24	20.92	217.59	151.27	157.99	3.97	8.67	6.3	4886.43	5167.04	4489.22	406.88	322.67	683.86	6574.59	4321.33	5244.51	145.39	286.21	196
BnaA01g15650D	1.82	2.65	3.78	1.97	85.33	137.67	197	113.05	1.52	1.89	2.05	2.26	1.95	3.74	5.05	3.5	2.8	1.87	2.21	1.82	77	83	96	99	105	209	261	170.99	159	117.16	125	97
BnaA01g15660D	0.22	0.05	0.19	0.57	1.33	0.33	1.33	4.33	0.15	0.17	0.33	0	0	0.14	0.15	0.16	0.27	0.49	1.08	0.14	1	1	2	0	0	1	1	1	2	4	8	1
BnaA01g15670D	4.12	1.59	3.18	0.81	68	28.67	58.91	16	3.53	4.27	4.57	1.49	2.01	1.27	3.34	2.68	3.51	0.59	0.71	1.12	63	66	75	23	38	25	60.73	46	70	13	14	21
BnaA01g15680D	0	0	0.02	0	0	0	0.33	0	0	0	0	0	0	0	0.07	0	0	0	0	0	0	0	0	0	0	0	1	0	0	0	0	0
BnaA01g15690D	18.4	14.15	16.36	11.56	269.17	225.26	266.38	207.48	17.15	18.41	19.64	14.54	11.6	16.31	16.35	16.75	15.99	13.39	9.7	11.59	270.76	251.37	285.39	197.95	194.42	283.4	262.58	254.34	282.22	260.58	170.28	191.59
BnaA01g15700D	0.29	0.05	0.2	0.12	5.33	1	4	2.67	0.3	0.23	0.33	0	0.05	0.09	0.05	0.47	0.09	0.16	0.09	0.1	6	4	6	0	1	2	1	9	2	4	2	2
BnaA01g15710D	0.24	0.02	0.01	0	8.67	1	0.33	0	0.15	0.3	0.28	0	0.07	0	0	0	0.02	0	0	0	6	10	10	0	3	0	0	0	1	0	0	0
BnaA01g15720D	2.92	2.09	1.81	1.17	99.77	79.61	69.31	49.29	2.92	3.18	2.65	1.26	2.98	2.02	1.8	1.7	1.93	1.28	1.21	1.03	107.81	101.54	89.95	40.11	116.71	82.02	67.74	60.54	79.66	58.22	49.77	39.88
BnaA01g15730D	7.37	0.58	2.25	0.34	179.92	15.3	61.49	10.17	6.65	6.33	9.12	0.54	0.75	0.44	2.7	1.67	2.37	0.4	0.26	0.36	175	144	220.77	12.15	21	12.75	72.42	42.25	69.79	13.02	7.48	10
BnaA01g15740D	6.93	2.68	6.95	2.43	164.98	70.71	184.12	70.61	6.53	6.8	7.45	2.05	2.87	3.13	6.16	7.48	7.2	2.38	2.65	2.25	167.84	150.98	176.13	45.46	78.12	88.54	161.02	184.73	206.6	75.44	75.8	60.59
BnaA01g15750D	18.82	13.96	19.68	11.67	661.32	532.38	769.66	498.52	19.2	20.87	16.4	14.54	12.8	14.55	19.21	20.23	19.59	10.41	13.26	11.35	727.84	684.05	572.06	475.26	514.87	607.01	741.09	737.79	830.1	486.32	558.57	450.67
BnaA01g15760D	3.49	3.62	5.44	5.04	100.83	113.75	174.77	176.98	3.53	3.05	3.88	3.61	2.68	4.57	5.71	5.03	5.57	5.19	4.83	5.09	109.71	81.94	110.84	96.74	88.33	156.17	180.61	150.29	193.41	198.6	166.61	165.73
BnaA01g15770D	0.15	0	0	0	3.67	0	0	0	0.15	0.04	0.25	0	0	0	0	0	0	0	0	0	4	1	6	0	0	0	0	0	0	0	0	0
BnaA01g15780D	18.58	3.32	6.12	2.92	256.07	50.33	94.35	49.46	14.47	17.89	23.37	3.11	2.84	4.01	5.93	6.26	6.17	3.21	2.36	3.2	216.04	231	321.16	40	45	66	90.11	89.94	103	59.13	39.24	50
BnaA01g15790D	0.11	0	0	0	0.33	0	0	0	0	0	0.34	0	0	0	0	0	0	0	0	0	0	0	1	0	0	0	0	0	0	0	0	0
BnaA01g15800D	0.73	0.3	0.68	0.27	46.97	21.59	48.25	21.14	0.85	0.7	0.63	0.23	0.34	0.34	0.75	0.66	0.62	0.28	0.29	0.24	58.9	42	40	14	24.77	26	52.9	43.86	48	24.06	22	17.36
BnaA01g15810D	5.97	2.16	3.75	2.67	254.53	99.43	176.88	138.33	5.27	5.88	6.77	2.48	1.16	2.83	4.44	3.98	2.84	2.32	2.83	2.87	242.56	234.1	286.93	98.33	56.56	143.39	207.96	176.56	146.11	131.71	144.77	138.51
BnaA01g15820D	3.38	3.07	1.58	1.13	143.05	139.48	74.58	58.6	3.06	3.39	3.68	3.64	3.44	2.14	1.41	1.75	1.59	0.99	1.58	0.83	140	134	155.16	143.77	166.8	107.88	65.72	76.84	81.18	55.58	80.35	39.86
BnaA01g15830D	0	0	0	0	0	0	0	0	0	0	0	0	0	0	0	0	0	0	0	0	0	0	0	0	0	0	0	0	0	0	0	0
BnaA01g15840D	11.44	6.83	5.94	6.91	256.27	165.51	148.44	190.51	11.12	11.61	11.59	7.19	6.78	6.51	5.78	5.8	6.24	8.07	7.24	5.41	268.64	242.5	257.66	149.8	173.77	172.96	142.09	134.8	168.44	240.41	194.32	136.8
BnaA01g15850D	0	0	0	0	0	0	0	0	0	0	0	0	0	0	0	0	0	0	0	0	0	0	0	0	0	0	0	0	0	0	0	0
BnaA01g15860D	0.02	0	0	0	0.33	0	0	0	0	0.07	0	0	0	0	0	0	0	0	0	0	0	1	0	0	0	0	0	0	0	0	0	0
BnaA01g15870D	5.84	9.68	4.36	10.54	134.94	238.06	111.91	298.91	5.53	5.44	6.56	12.19	8.65	8.2	4.6	4.16	4.32	11.68	12	7.94	137.64	117.02	150.17	261.53	228.27	224.38	116.32	99.4	120.02	358.06	331.8	206.87
BnaA01g15880D	0.58	0.27	0.31	9.28	17.33	8.8	9.67	333.85	0.7	0.22	0.83	0.04	0.64	0.12	0.41	0.43	0.09	11.21	9.28	7.34	22	6	24	1	21.41	4	13	13	3	435.11	324.48	241.95
BnaA01g15890D	0.01	0	0	0.07	0.33	0	0	2	0.04	0	0	0	0	0	0	0	0	0	0.14	0.07	1	0	0	0	0	0	0	0	0	0	4	2
BnaA01g15900D	9.6	3.79	7.77	2.79	181.33	80.33	163.33	65	9.51	10.54	8.74	2.16	4.81	4.41	8.82	7.24	7.24	3.54	2.25	2.57	194	186	164	38	104	99	183	142	165	89	51	55
BnaA01g15910D	6.04	0.13	9.13	0.09	151.38	3.86	248.33	2.67	7.59	3.78	6.74	0.04	0.14	0.22	9.35	10.74	7.29	0.03	0.1	0.14	202.1	87	165.03	1	4	6.57	253.2	274.98	216.82	1	3	4
BnaA01g15920D	0.21	0.11	0.22	0.08	6	3.33	7	2.67	0.23	0.19	0.22	0.04	0.13	0.15	0.16	0.14	0.36	0.08	0	0.16	7	5	6	1	4	5	5	4	12	3	0	5
BnaA01g15930D	0.87	0.71	0.6	0.56	9.33	7.67	6.88	7.09	1.61	0.41	0.58	1.14	0.67	0.32	0.85	0.56	0.4	0.53	0.48	0.68	18	4	6	11	8	4	9.64	6	5	7.27	6	8
BnaA01g15940D	62.72	45.41	59.86	49.49	822.16	651.71	871.39	788.37	65.17	61.35	61.65	39.76	45.24	51.22	63.76	57.14	58.68	50.43	45.38	52.65	918.74	748	799.73	483.42	676.84	794.88	914.54	774.86	924.78	876.62	711.02	777.46
BnaA01g15950D	94.41	265.36	121.5	471.24	3690.12	11303.4	5236.09	22353.3	102.95	97.5	82.79	245.51	272.75	277.83	129.68	132.13	102.69	475.74	419.03	518.96	4325.84	3543.3	3201.21	8897.15	12162.3	12850.7	5544.23	5340.71	4823.34	24646.8	19571.3	22841.9
BnaA01g15960D	15.82	20.18	15.47	25	201.03	272.71	217.86	385.89	16.73	14.27	16.47	25.43	15	20.11	16.13	15.02	15.27	25.6	24.62	24.79	228.11	168.27	206.7	299.1	217.14	301.89	223.83	197.02	232.73	430.42	373.17	354.09
BnaA01g15970D	0	0	0	0	0	0	0	0	0	0	0	0	0	0	0	0	0	0	0	0	0	0	0	0	0	0	0	0	0	0	0	0
BnaA01g15980D	0.21	0	0.04	0.06	4.67	0	1	1.67	0.26	0.05	0.32	0	0	0	0.04	0	0.08	0.1	0.04	0.04	6	1	7	0	0	0	1	0	2	3	1	1
BnaA01g15990D	0	0	0	0	0	0	0	0	0	0	0	0	0	0	0	0	0	0	0	0	0	0	0	0	0	0	0	0	0	0	0	0
BnaA01g16000D	0	0	0	0	0	0	0	0	0	0	0	0	0	0	0	0	0	0	0	0	0	0	0	0	0	0	0	0	0	0	0	0
BnaA01g16010D	0.09	0	0.23	0.03	1.67	0	4.67	0.67	0.16	0	0.11	0	0	0	0.26	0.16	0.28	0.08	0	0	3	0	2	0	0	0	5	3	6.02	2	0	0
BnaA01g16020D	0.12	0.21	0.23	0.14	2	4	4.67	3	0.11	0.12	0.12	0.12	0.35	0.15	0.1	0.17	0.43	0.09	0.14	0.2	2	2	2	2	7	3	2	3	9	2	3	4
BnaA01g16030D	0.76	0.54	0.59	0.33	33.87	26	29.54	17.33	0.85	0.85	0.59	0.54	0.57	0.52	0.45	0.5	0.82	0.31	0.25	0.42	40.6	35	26	22	29	27	21.92	23	43.69	18	13	21
BnaA01g16040D	1.26	0.31	0.69	0.18	17.33	4.67	10.53	3	1.28	1.17	1.32	0.16	0.51	0.25	0.77	0.63	0.66	0.11	0.3	0.13	19	15	18	2	8	4	11.58	9	11	2	5	2
BnaA01g16050D	0.93	0.27	0.33	0.53	21.88	6.45	8.36	14.95	1.09	0.69	1.01	0.43	0.08	0.29	0.32	0.36	0.3	0.44	0.5	0.66	27.4	14.91	23.34	9.34	2.12	7.88	8.07	8.6	8.41	13.65	13.86	17.33
BnaA01g16060D	6.55	4.18	5.94	4.51	176.09	122.36	177.33	147.33	6.94	6.13	6.59	3.79	4.02	4.72	4.74	6.38	6.7	4.5	4.77	4.27	200.27	153	175	94.25	123	149.82	139	177	216	160	153	129
BnaA01g16070D	1	0.33	0.78	0.21	114.04	42.92	99.24	29.33	0.91	1.31	0.77	0.21	0.42	0.37	0.8	0.95	0.6	0.27	0.22	0.13	113.1	141.03	88	22	56	50.77	100.72	113	84	41	30	17
BnaA01g16080D	7.43	5.35	8.89	4.33	191.99	148.89	256	136	8.28	7.74	6.26	5.58	6.24	4.22	7.68	9.02	9.98	4.38	4.18	4.43	229.96	186	160	133.72	183.96	129	217	241	310	150	129	129
BnaA01g16090D	0.96	2.17	2.19	2.39	13.59	32.95	34.13	41.31	1.01	0.91	0.95	2.67	1.67	2.16	2.57	2.51	1.48	2.65	1.67	2.84	15.43	11.99	13.34	35.24	27.16	36.46	40.09	36.92	25.39	50.02	28.41	45.49
BnaA01g16100D	2.62	1.03	2.38	1.26	69.49	29.69	70.33	40.67	2.63	2.81	2.43	1.1	0.63	1.37	2.27	2.36	2.5	1.22	1.13	1.44	75.1	69.38	64	27.08	19	43	66	65	80	43	36	43
BnaA01g16110D	1.03	0.35	1.2	0.25	70.51	26.39	91.98	20.82	0.86	1.03	1.19	0.33	0.32	0.4	1.18	1.27	1.16	0.25	0.21	0.28	64	66	81.54	21	25.18	33	89.44	90.5	96.01	23	17.45	22
BnaA01g16120D	0	0	0	0	0	0	0	0	0	0	0	0	0	0	0	0	0	0	0	0	0	0	0	0	0	0	0	0	0	0	0	0
BnaA01g16130D	71.58	58.12	50.43	48.81	771.79	685.33	605.33	637.67	73.31	60.95	80.48	49.7	60.51	64.14	52.91	44.11	54.27	49.48	42.99	53.96	848.36	610	857	496	743	817	623	491	702	706	553	654
BnaA01g16140D	4.61	1.26	3.64	0.94	129.71	38.13	114.05	31.75	4.98	4.81	4.03	1.43	1.05	1.3	3.55	3.42	3.94	0.61	1.09	1.13	150.82	125.92	112.38	37.3	33.81	43.27	109.32	99.56	133.27	22.76	36.63	35.86
BnaA01g16150D	0	0	0	0	0	0	0	0	0	0	0	0	0	0	0	0	0	0	0	0	0	0	0	0	0	0	0	0	0	0	0	0
BnaA01g16160D	0.42	0	0.57	0.15	6	0	9.08	2.67	0.32	0.59	0.34	0	0	0	0.31	0.92	0.47	0.1	0.29	0.06	5	8	5	0	0	0	5.01	14	8.24	2	5	1
BnaA01g16170D	24.35	31.68	26.25	32.26	266	377.17	319.38	427.58	25.67	22.09	25.3	28.97	31.1	34.98	26.07	23.77	28.92	32.94	29.73	34.12	301	224	273	293	387	451.5	311	268.13	379	476.26	387.49	419
BnaA01g16180D	0	0	0	0	0	0	0	0	0	0	0	0	0	0	0	0	0	0	0	0	0	0	0	0	0	0	0	0	0	0	0	0
BnaA01g16190D	0	0	0	0	0	0	0	0	0	0	0	0	0	0	0	0	0	0	0	0	0	0	0	0	0	0	0	0	0	0	0	0
BnaA01g16200D	0	0	0	0	0	0	0	0	0	0	0	0	0	0	0	0	0	0	0	0	0	0	0	0	0	0	0	0	0	0	0	0
BnaA01g16210D	0	0	0	0	0	0	0	0	0	0	0	0	0	0	0	0	0	0	0	0	0	0	0	0	0	0	0	0	0	0	0	0
BnaA01g16220D	0.03	0	0	0	0.33	0	0	0	0	0	0.09	0	0	0	0	0	0	0	0	0	0	0	1	0	0	0	0	0	0	0	0	0
BnaA01g16230D	0	0	0	0	0	0	0	0	0	0	0	0	0	0	0	0	0	0	0	0	0	0	0	0	0	0	0	0	0	0	0	0
BnaA01g16240D	4.52	0.75	6.55	0.99	179.82	33.18	291.03	47.6	4.27	4.96	4.34	0.61	0.6	1.05	6.72	6.29	6.64	0.77	1.25	0.94	183.43	184.39	171.65	22.53	27.43	49.59	293.92	260.11	319.06	40.73	59.7	42.36
BnaA01g16250D	2.44	1.07	2.51	1.06	46.58	22.44	53.39	25.08	2.39	3.42	1.52	1.03	1.25	0.94	3.65	1.96	1.91	1.21	1.12	0.86	49.47	61.28	29	18.35	27.52	21.45	76.96	39	44.2	30.88	25.76	18.59
BnaA01g16260D	16.09	3.26	10.97	1.35	746.24	161.64	567.97	75.66	17.23	19.76	11.28	4.14	2.54	3.1	9.17	11.81	11.93	1.13	1.38	1.53	862.92	855.94	519.86	178.93	135	171	467	569	667.9	69.98	77	80
BnaA01g16270D	34.9	27.13	52.05	27.77	430	365.33	709.67	414.33	40.04	34.05	30.6	23.44	26.46	31.5	58.03	48.56	49.57	27.69	26.22	29.41	529	389	372	267	371	458	780	617	732	451	385	407
BnaA01g16280D	1.54	0.53	4.96	0.55	35.16	13	123.05	15	1.81	1	1.81	0.48	0.39	0.71	6.32	5.05	3.5	0.43	0.48	0.75	44	21	40.49	10	10	19	156.1	118	95.05	13	13	19
BnaA01g16290D	0	0	0	0	0	0	0	0	0	0	0	0	0	0	0	0	0	0	0	0	0	0	0	0	0	0	0	0	0	0	0	0
BnaA01g16300D	2.56	0.28	0.46	1.07	72.62	9	15	36.91	2.07	3.32	2.3	0.26	0.24	0.35	0.45	0.24	0.7	0.53	1.94	0.74	64	88.53	65.34	7	8	12	14	7	24	20	66.72	24
BnaA01g16310D	2.95	0.71	6.24	0.88	37.67	10.33	89.33	13.67	1.29	3.14	4.43	0.41	0.74	0.97	2.88	9.45	6.4	0.52	1.29	0.82	18	38	57	5	11	15	41	127	100	9	20	12
BnaA01g16320D	0.03	0	0.01	0	1	0	0.33	0	0	0	0.08	0	0	0	0.02	0	0	0	0	0	0	0	3	0	0	0	1	0	0	0	0	0
BnaA01g16330D	19.96	2.04	21.37	2.03	482.57	54.45	579.87	59.36	19.54	20.57	19.76	1.64	2.2	2.28	17.41	20.63	26.07	1.34	2.86	1.9	509.61	464	474.1	36.99	60.93	65.44	462	517.61	760	43.08	83	52
BnaA01g16340D	0.81	0	0.51	0	6	0	4.41	0	0.75	0.72	0.95	0	0	0	0	0.39	1.14	0	0	0	6	5	7	0	0	0	0	3	10.24	0	0	0
BnaA01g16350D	0	0	0	0	0	0	0	0	0	0	0	0	0	0	0	0	0	0	0	0	0	0	0	0	0	0	0	0	0	0	0	0
BnaA01g16360D	6.55	3.15	6.91	2.89	201.59	106.14	236.32	108.15	6.42	6.93	6.3	2.86	3.69	2.91	7.58	6.79	6.36	2.78	2.55	3.35	213.34	199	192.43	82	130	106.42	256	217	235.96	114	94	116.44
BnaA01g16370D	1.39	122.41	1.87	90.51	24.06	2316.39	35.52	1940.58	1.22	1.64	1.31	123.06	137.52	106.66	1.19	3.2	1.23	108.6	77.6	85.33	22.89	26.66	22.63	1996.24	2744.72	2208.2	22.82	57.91	25.84	2518.32	1622.32	1681.1
BnaA01g16380D	0	7.33	0.04	5.41	0	64.26	0.33	53.87	0	0	0	8.43	1.62	11.95	0.06	0.06	0	6.17	6.51	3.55	0	0	0	63.25	15	114.53	0.5	0.5	0	66.21	63	32.4
BnaA01g16390D	11.63	8.44	7.74	7.87	105	82.33	78.67	87.33	12.46	11.91	10.52	8.6	9.99	6.74	8	5.35	9.86	9.77	6.48	7.37	121	100	94	72	103	72	79	50	107	117	70	75
BnaA01g16400D	101.09	70.78	11.61	57.54	2302.67	1774.67	303.67	1609.67	80.98	132.75	89.53	66.02	91.15	55.17	0.91	13.9	20.03	54.38	55.76	62.47	2011	2851	2046	1414	2402	1508	23	332	556	1665	1539	1625
BnaA01g16410D	0.04	0	0.04	0	1.43	0	1.67	0	0.06	0.03	0.03	0	0	0	0	0	0.13	0	0	0	2.22	1	1.08	0	0	0	0	0	5	0	0	0
BnaA01g16420D	19.37	18.01	26.31	25.73	1092.67	1103.33	1642.09	1761.33	19.44	19.91	18.75	18.52	15.66	19.86	28.1	28.13	22.71	22.97	28.03	26.19	1182	1047	1049	971	1010	1329	1738	1645	1543.26	1722	1894	1668
BnaA01g16430D	2.38	1.55	2.1	1.48	33	24	32.33	25	2.07	2.16	2.9	0.93	1.95	1.76	2.56	2.01	1.73	1.25	1.92	1.28	31	28	40	12	31	29	39	29	29	23	32	20
BnaA01g16440D	126.56	15.38	70.51	14.36	3201.45	435.33	1970.8	432.95	112.99	64.74	201.94	8.14	15.04	22.96	84.93	60.95	65.65	8.46	19.94	14.69	3058.64	1515.51	5030.21	190	432	684	2339.07	1587	1986.33	282.42	599.96	416.47
BnaA01g16450D	12.35	2.59	8.12	1.86	200.6	46	147.95	37.5	10.56	12.42	14.06	2.37	3.54	1.86	7.94	7.61	8.81	2.1	2.66	0.81	185.56	188.81	227.43	36	66	36	141.99	128.65	173.2	45.51	52	15
BnaA01g16460D	0.28	0.1	0.11	0.04	5.19	2	2.33	1	0.23	0.29	0.33	0	0.24	0.05	0.15	0.1	0.09	0.12	0	0	4.56	5	6	0	5	1	3	2	2	3	0	0
BnaA01g16470D	0.75	0.82	1.37	0.9	14.33	17.67	29	21.1	0.48	0.67	1.1	0.5	0.82	1.14	1.28	1.7	1.12	0.79	1.04	0.87	10	12	21	9	18	26	27	34	26	20.29	24	19
BnaA01g16480D	0.08	0	0.14	0.04	0.67	0	1.33	0.33	0.24	0	0	0	0	0	0	0	0.43	0	0.11	0	2	0	0	0	0	0	0	0	4	0	1	0
BnaA01g16490D	2.32	1.73	1.47	0.74	37.43	31.21	26.33	14.67	2.56	1.87	2.52	0.74	3.36	1.1	1.31	1.44	1.66	0.94	0.68	0.61	44.29	28	40	11	61.64	21	23	24	32	20	13	11
BnaA01g16500D	0	0	0	0	0	0	0	0	0	0	0	0	0	0	0	0	0	0	0	0	0	0	0	0	0	0	0	0	0	0	0	0
BnaA01g16510D	0.23	0.03	0.16	0.03	4.67	0.67	3.67	0.67	0.18	0.16	0.35	0	0.04	0.04	0.36	0.09	0.04	0.04	0	0.04	4	3	7	0	1	1	8	2	1	1	0	1
BnaA01g16520D	1.98	4.7	2.04	3.09	71.29	185.04	82	135.37	1.75	1.99	2.21	4.37	5.19	4.55	1.95	1.93	2.23	2.72	3.4	3.16	67.88	67	79	146.61	214	194.5	77	72	97	130.56	146.87	128.67
BnaA01g16530D	31.3	439.56	31.47	474.72	515.14	7825.85	576.24	9597.87	26.8	40.27	26.83	527.9	364.8	425.99	33.23	36.23	24.96	411.65	626.96	385.54	479.82	623.61	442	8151.26	6931	8395.3	605.25	624	499.47	9086.69	12476.6	7230.29
BnaA01g16540D	0.74	1.03	0.94	0.77	27.36	41	38	33.67	0.94	0.53	0.75	1	0.96	1.13	1.3	0.87	0.66	0.35	1.35	0.61	37.08	18	27	34	40	49	52	33	29	17	59	25
BnaA01g16550D	0	0	0	0	0	0	0	0	0	0	0	0	0	0	0	0	0	0	0	0	0	0	0	0	0	0	0	0	0	0	0	0
BnaA01g16560D	4.97	8.54	7.58	5.78	119.59	222.77	200.49	168.95	5.69	5.05	4.17	8.21	9.09	8.32	7.54	8.74	6.46	5.36	7.14	4.85	146.93	112.8	99.05	182.82	249.06	236.42	198.05	217.09	186.34	170.72	204.87	131.25
BnaA01g16570D	0.05	0.04	0	0	0.33	0.33	0	0	0	0	0.15	0	0	0.12	0	0	0	0	0	0	0	0	1	0	0	1	0	0	0	0	0	0
BnaA01g16580D	0	0	0	0	0	0	0	0	0	0	0	0	0	0	0	0	0	0	0	0	0	0	0	0	0	0	0	0	0	0	0	0
BnaA01g16590D	0	0	0	0	0	0	0	0	0	0	0	0	0	0	0	0	0	0	0	0	0	0	0	0	0	0	0	0	0	0	0	0
BnaA01g16600D	21.41	6.76	26.06	5.01	706.67	245	952	201.13	19.93	22.69	21.6	6.21	5.86	8.2	27.17	29.49	21.52	4.32	5.88	4.83	711	700	709	191	222	322	986	1012	858	190	233	180.4
BnaA01g16610D	5.9	1.8	7.12	1.41	118.33	39.67	159	34.33	5.52	7.29	4.9	1.76	1.43	2.22	6.51	8.13	6.71	1.23	1.2	1.8	120	137	98	33	33	53	144	170	163	33	29	41
BnaA01g16620D	7.01	1.22	6.51	0.74	66.19	12.16	68	8.33	8.85	7.5	4.68	1.55	1.03	1.08	4.47	7.72	7.35	0.48	0.89	0.85	89.47	65.54	43.56	13.49	11	12	46	75	83	6	10	9
BnaA01g16630D	5.46	2.01	6.5	1.74	76.97	30.94	101.7	29.67	6.22	4.72	5.44	1.69	1.87	2.46	8.11	4.89	6.5	1.83	1.31	2.09	93.77	61.57	75.58	22	30	40.81	124.56	70.93	109.61	34	22	33
BnaA01g16640D	4.13	3.28	3.48	4.26	60.51	51	56.47	74.61	4.44	3.17	4.79	3.92	3.31	2.61	3.64	3.18	3.62	3.36	4.42	4.99	69.53	43	69	53	55	45	58	48	63.4	65	77	81.84
BnaA01g16650D	3.6	4.34	3.06	7.36	88.93	115.01	83.87	220.67	3.53	3.38	3.88	5.39	2.26	5.38	3.07	3.06	3.04	6.39	8.94	6.74	94	77.8	95	123.6	63.9	157.54	83	78.32	90.3	209.57	264.55	187.9
BnaA01g16660D	10.85	14.8	10.56	12.6	278.72	411.21	302.81	394	11.16	11.65	9.73	15.71	15.39	13.31	9.93	10.36	11.38	12.15	12.7	12.96	309.16	279	248	375.28	452.36	405.98	280	276	352.44	415	390.99	376
BnaA01g16670D	0.01	0.05	0	0.14	0.33	1.06	0	3.67	0.04	0	0	0.06	0	0.08	0	0	0	0.14	0.12	0.17	1	0	0	1.17	0	2	0	0	0	4	3	4
BnaA01g16680D	0.12	0.02	0.21	0.12	1.33	0.33	2.67	1.67	0.08	0.18	0.09	0	0	0.07	0.46	0.16	0	0	0.14	0.23	1	2	1	0	0	1	6	2	0	0	2	3
BnaA01g16690D	0	0	0	0	0	0	0	0	0	0	0	0	0	0	0	0	0	0	0	0	0	0	0	0	0	0	0	0	0	0	0	0
BnaA01g16700D	31.39	1.52	4.75	0.47	927.07	49.25	158.54	17.2	24.64	40.95	28.59	1.33	2.52	0.7	3.71	5.06	5.47	0.4	0.55	0.47	793.41	1140.63	847.18	36.99	85.97	24.79	121.67	156.88	197.08	16.01	19.67	15.93
BnaA01g16710D	12.6	1.46	6.57	1.52	534.5	69.05	309.99	78.81	12.26	12.86	12.67	1.08	1.5	1.81	6.66	6.72	6.33	1.45	1.77	1.34	561	509	533.49	42.78	73	91.36	309.98	296	324	82	90	64.44
BnaA01g16720D	7.13	6.32	5.64	5.62	164.3	160.45	146.49	160.57	6.08	8.09	7.21	5.65	6.67	6.63	5.11	5.3	6.51	6.84	5.36	4.66	152	175	165.89	121.93	177	182.42	130	127.48	182	210.76	148.95	122
BnaA01g16730D	0	0.03	0	0	0	0.33	0	0	0	0	0	0	0.08	0	0	0	0	0	0	0	0	0	0	0	1	0	0	0	0	0	0	0
BnaA01g16740D	0.04	0.39	0.4	0.7	0.33	4	4	7.33	0	0	0.11	0	0.89	0.29	0.83	0	0.38	0.34	0.47	1.3	0	0	1	0	9	3	8	0	4	4	5	13
BnaA01g16750D	1.6	3.34	3.11	2.93	48.22	110.62	102.87	106.4	2.18	1.67	0.95	2.45	3.2	4.36	3.62	3.13	2.59	2.91	2.51	3.38	70.12	46.43	28.1	68.03	109.21	154.63	118.6	96.82	93.2	115.49	89.76	113.94
BnaA01g16760D	0	0.03	0	0	0	0.33	0	0	0	0	0	0	0	0.1	0	0	0	0	0	0	0	0	0	0	0	1	0	0	0	0	0	0
BnaA01g16770D	0	0	0	0	0	0	0	0	0	0	0	0	0	0	0	0	0	0	0	0	0	0	0	0	0	0	0	0	0	0	0	0
BnaA01g16780D	27.48	39.42	26.61	56.96	1031	1598.18	1106.67	2600.27	28.9	28.63	24.92	41.86	37.21	39.19	28.55	26.59	24.68	58.11	53.33	59.43	1167	1000	926	1458	1594.53	1742	1173	1033	1114	2893	2393.82	2514
BnaA01g16790D	0	0	0	0	0	0	0	0	0	0	0	0	0	0	0	0	0	0	0	0	0	0	0	0	0	0	0	0	0	0	0	0
BnaA01g16800D	0	0	0	0	0	0	0	0	0	0	0	0	0	0	0	0	0	0	0	0	0	0	0	0	0	0	0	0	0	0	0	0
BnaA01g16810D	0.18	0	0	0	0.67	0	0	0	0	0	0.54	0	0	0	0	0	0	0	0	0	0	0	2	0	0	0	0	0	0	0	0	0
BnaA01g16820D	0	0	0	0	0	0	0	0	0	0	0	0	0	0	0	0	0	0	0	0	0	0	0	0	0	0	0	0	0	0	0	0
BnaA01g16830D	5.35	1.43	5.42	1.17	173.57	49.33	196.67	46	5.31	5.41	5.33	1.96	0.75	1.59	5.23	5	6.04	1.04	1.13	1.34	185.66	163.53	171.52	59	28	61	186	168	236	45	44	49
BnaA01g16840D	0.04	0.07	0	0.05	0.67	1.39	0	1.05	0.05	0	0.06	0	0	0.2	0	0	0	0	0.15	0	1	0	1	0	0	4.17	0	0	0	0	3.15	0
BnaA01g16850D	5.52	0.58	6.03	0.63	82.97	9.67	99	11.33	5.6	3.52	7.43	0.43	0.64	0.68	6.11	7.31	4.67	0.45	0.84	0.59	90	49	109.9	6	11	12	100	113	84	9	15	10
BnaA01g16860D	37.17	22.21	33.25	21.76	298.51	194.88	297.58	213.94	41.74	36.88	32.89	18.16	29.59	18.87	30.33	31.22	38.19	27.46	15.66	22.15	359.72	274.94	260.86	135	270.65	179	266	258.85	367.9	291.83	150	200
BnaA01g16870D	1.06	0.21	1.14	0.19	28.99	6.05	34.72	6.53	1.11	1.01	1.06	0.31	0.1	0.22	1.12	0.96	1.33	0.24	0.24	0.1	32.65	25.66	28.66	7.9	3.16	7.08	33.39	27.16	43.62	8.63	7.82	3.15
BnaA01g16880D	0	0	0	0	0	0	0	0	0	0	0	0	0	0	0	0	0	0	0	0	0	0	0	0	0	0	0	0	0	0	0	0
BnaA01g16890D	0	0	0	0	0	0	0	0	0	0	0	0	0	0	0	0	0	0	0	0	0	0	0	0	0	0	0	0	0	0	0	0
BnaA01g16900D	0	0	0	0	0	0	0	0	0	0	0	0	0	0	0	0	0	0	0	0	0	0	0	0	0	0	0	0	0	0	0	0
BnaA01g16910D	3.27	3.28	0.06	1.49	44.58	50.59	1	26.06	1.79	5.18	2.84	2.23	5.56	2.05	0	0	0.18	2.66	0.49	1.32	27	67.39	39.34	29	88.76	34	0	0	3	49.28	8.13	20.76
BnaA01g16920D	0	0	0	0	0	0	0	0	0	0	0	0	0	0	0	0	0	0	0	0	0	0	0	0	0	0	0	0	0	0	0	0
BnaA01g16930D	0	0	0	0	0	0	0	0	0	0	0	0	0	0	0	0	0	0	0	0	0	0	0	0	0	0	0	0	0	0	0	0
BnaA01g16940D	0.14	0	0	0	2	0	0	0	0	0.07	0.34	0	0	0	0	0	0	0	0	0	0	1	5	0	0	0	0	0	0	0	0	0
BnaA01g16950D	0	0	0	0	0	0	0	0	0	0	0	0	0	0	0	0	0	0	0	0	0	0	0	0	0	0	0	0	0	0	0	0
BnaA01g16960D	0.89	0.29	0.98	0.92	11.67	4.33	14.33	15.18	0.7	1.05	0.91	0.24	0.13	0.51	1.03	1.09	0.81	1.13	1.29	0.33	10	13	12	3	2	8	15	15	13	20	20.54	5
BnaA01g16970D	0.2	0.19	0.29	0.03	3	3	4.67	0.67	0.25	0.07	0.27	0.22	0	0.34	0.43	0.45	0	0.1	0	0	4	1	4	3	0	6	7	7	0	2	0	0
BnaA01g16980D	0	0	0	0	0	0	0	0	0	0	0	0	0	0	0	0	0	0	0	0	0	0	0	0	0	0	0	0	0	0	0	0
BnaA01g16990D	0.58	0.15	0.51	0.1	9.67	2.67	9.33	2	0.8	0.33	0.62	0.2	0	0.26	0.67	0.3	0.56	0.09	0.05	0.16	14	5	10	3	0	5	12	5	11	2	1	3
BnaA01g17000D	0.81	0.54	0.91	0.45	15.33	11.33	19	10.33	1.19	0.69	0.54	0.29	0.66	0.68	0.54	0.98	1.2	0.52	0.36	0.47	24	12	10	5	14	15	11	19	27	13	8	10
BnaA01g17010D	8.05	4.1	12.4	1.06	121.67	68.67	207	19.33	9.39	7.43	7.32	2.51	4.95	4.83	16.89	9.7	10.62	0.9	1.33	0.94	152	104	109	35	85	86	278	151	192	18	24	16
BnaA01g17020D	1.18	0.22	2.14	0.03	37.92	8	76.58	1.33	1.53	0.87	1.15	0.03	0.25	0.37	1.51	1.93	2.99	0.07	0	0.03	52.04	25.55	36.18	1	9	14	52.51	63.35	113.89	3	0	1
BnaA01g17030D	0.06	0.09	0	0	0.67	1	0	0	0	0.1	0.09	0.19	0	0.08	0	0	0	0	0	0	0	1	1	2	0	1	0	0	0	0	0	0
BnaA01g17040D	3.16	4.09	2.38	3.47	25.33	35.33	21.67	34.33	3	3.47	3.01	4.95	2.39	4.92	1.47	2.28	3.4	4.02	3.74	2.64	26	26	24	37	22	47	13	19	33	43	36	24
BnaA01g17050D	1.36	6.39	2.79	5.85	40.23	208.67	92.33	209.67	1.54	1.45	1.1	4.31	9.14	5.72	0.99	3.37	4	5.11	7.43	5.02	48.94	39.74	32	118	308	200	32	103	142	200	262	167
BnaA01g17060D	2.87	4.97	2.3	7.78	72.67	134.04	64	238.04	2.86	2.71	3.03	6.46	3.56	4.9	1.98	3.05	1.87	6.46	8.31	8.58	78	64	76	152	103	147.12	55	80	57	217.12	252	245
BnaA01g17070D	3.66	2.85	1.54	4.24	46.33	40.33	22	65	2.53	4.52	3.93	2.18	3.34	3.02	0.85	1.88	1.88	2.93	3.71	6.08	35	54	49.98	26	49	46	12	25	29	50	57	88
BnaA01g17080D	0	0	0	0	0	0	0	0	0	0	0	0	0	0	0	0	0	0	0	0	0	0	0	0	0	0	0	0	0	0	0	0
BnaA01g17090D	0.11	0	0.1	0	2.29	0	2.33	0	0.05	0.05	0.24	0	0	0	0.04	0.05	0.2	0	0	0	1	1	4.86	0	0	0	1	1	5	0	0	0
BnaA01g17100D	1.08	0.5	1.69	0.44	15.33	8	27	7.67	0.91	1.35	0.99	0.3	0.31	0.89	1.85	1.35	1.86	0.63	0.18	0.5	14	18	14	4	5	15	29	20	32	12	3	8
BnaA01g17110D	0	0	0	0	0	0	0	0	0	0	0	0	0	0	0	0	0	0	0	0	0	0	0	0	0	0	0	0	0	0	0	0
BnaA01g17120D	0.67	0.07	0.53	0.03	11.39	1.33	10.23	0.67	0.73	0.8	0.47	0	0.15	0.05	0.48	0.34	0.76	0	0.05	0.05	13.45	12.71	8	0	3	1	9	6	15.68	0	1	1
BnaA01g17130D	3.17	1.89	4	2.4	109.33	72.32	153.67	99.8	2.66	2.83	4.03	1.43	1.82	2.41	3.96	3.99	4.04	1.7	2.59	2.92	99	91	138	46	72	98.96	150	143	168	78	107.41	114
BnaA01g17140D	0.75	1.09	0.66	0.24	30.34	46.13	29.33	12	0.85	0.64	0.75	1.64	0.69	0.94	0.72	0.86	0.41	0.22	0.29	0.22	37	24	30.03	61.4	32	45	32	36	20	12	14	10
BnaA01g17150D	3.28	6.34	5.24	2.06	65.33	141.67	116.07	50.49	4.27	3.37	2.19	1.69	14.78	2.56	2.97	5.85	6.89	2.84	1.73	1.61	91	62	43	31	334	60	64.35	119.86	164	74.47	41	36
BnaA01g17160D	0	0	0	0	0	0	0	0	0	0	0	0	0	0	0	0	0	0	0	0	0	0	0	0	0	0	0	0	0	0	0	0
BnaA01g17170D	5.21	25.64	9.2	20.71	143.15	774.17	282.78	702.81	5.07	6.52	4.04	22.96	29.25	24.7	6.33	10.93	10.33	23.33	22.54	16.25	150.86	167.96	110.64	589.31	923.93	809.26	191.65	312.91	343.77	856.22	745.71	506.51
BnaA01g17180D	0	0	0	0	0	0	0	0	0	0	0	0	0	0	0	0	0	0	0	0	0	0	0	0	0	0	0	0	0	0	0	0
BnaA01g17190D	0	0.02	0	0.02	0	0.33	0	0.33	0	0	0	0	0	0.07	0	0	0	0	0.07	0	0	0	0	0	0	1	0	0	0	0	1	0
BnaA01g17200D	0	0	0	0	0	0	0	0	0	0	0	0	0	0	0	0	0	0	0	0	0	0	0	0	0	0	0	0	0	0	0	0
BnaA01g17210D	0.72	0.82	0.1	0	2	2.33	0.33	0	1.37	0.79	0	1.19	0.97	0.31	0	0	0.31	0	0	0	4	2	0	3	3	1	0	0	1	0	0	0
BnaA01g17220D	0	0	0	0	0	0	0	0	0	0	0	0	0	0	0	0	0	0	0	0	0	0	0	0	0	0	0	0	0	0	0	0
BnaA01g17230D	0.29	0.11	0	0	2.33	1	0	0	0.23	0.14	0.51	0	0	0.32	0	0	0	0	0	0	2	1	4	0	0	3	0	0	0	0	0	0
BnaA01g17240D	0	0	0	0	0	0	0	0	0	0	0	0	0	0	0	0	0	0	0	0	0	0	0	0	0	0	0	0	0	0	0	0
BnaA01g17250D	0	0.22	0	0	0	0.67	0	0	0	0	0	0.36	0.29	0	0	0	0	0	0	0	0	0	0	1	1	0	0	0	0	0	0	0
BnaA01g17260D	0.06	0	0	0	0.33	0	0	0	0	0	0.18	0	0	0	0	0	0	0	0	0	0	0	1	0	0	0	0	0	0	0	0	0
BnaA01g17270D	0	0	0	0	0	0	0	0	0	0	0	0	0	0	0	0	0	0	0	0	0	0	0	0	0	0	0	0	0	0	0	0
BnaA01g17280D	0.05	0.06	0	0	1	1.33	0	0	0	0.05	0.1	0.15	0	0.04	0	0	0	0	0	0	0	1	2	3	0	1	0	0	0	0	0	0
BnaA01g17290D	0.47	0.28	0.06	0.41	2.33	1.33	0.33	2.33	0.37	0.43	0.61	0.65	0.18	0	0	0.19	0	0	0.33	0.89	2	2	3	3	1	0	0	1	0	0	2	5
BnaA01g17300D	0.06	0	0	0	0.33	0	0	0	0	0	0.19	0	0	0	0	0	0	0	0	0	0	0	1	0	0	0	0	0	0	0	0	0
BnaA01g17310D	0	0	0	0	0	0	0	0	0	0	0	0	0	0	0	0	0	0	0	0	0	0	0	0	0	0	0	0	0	0	0	0
BnaA01g17320D	0	0	0	0	0	0	0	0	0	0	0	0	0	0	0	0	0	0	0	0	0	0	0	0	0	0	0	0	0	0	0	0
BnaA01g17330D	0.38	0.17	0.28	0.13	8.33	4.33	7	3.67	0.25	0.48	0.4	0.1	0.23	0.19	0.4	0.38	0.07	0.13	0.26	0	6	10	9	2	6	5	10	9	2	4	7	0
BnaA01g17340D	0.81	0.02	0.41	0	20.67	0.67	11.5	0	0.99	0.93	0.52	0	0	0.07	0.74	0.15	0.33	0	0	0	27	22	13	0	0	2	20.54	4	9.96	0	0	0
BnaA01g17350D	5.38	2.59	6.56	2.48	65.3	35.19	88.92	37.27	5.2	3.66	7.29	1.12	3.78	2.86	9.43	3.28	6.96	3.95	1.42	2.06	67.6	41.16	87.13	12.53	52.15	40.89	124.66	41.04	101.06	63.18	20.56	28.08
BnaA01g17360D	0.66	0.97	4.26	0.2	7.33	11.17	50.61	2.67	1.13	0.2	0.66	1.06	0.9	0.95	7.25	2.55	2.99	0.35	0	0.25	13	2	7	10.5	11	12	85	28.31	38.52	5	0	3
BnaA01g17370D	0	0	0	0	0	0	0	0	0	0	0	0	0	0	0	0	0	0	0	0	0	0	0	0	0	0	0	0	0	0	0	0
BnaA01g17380D	0	0	0	0	0	0	0	0	0	0	0	0	0	0	0	0	0	0	0	0	0	0	0	0	0	0	0	0	0	0	0	0
BnaA01g17390D	0	0.01	0	0	0	0.33	0	0	0	0	0	0	0	0.04	0	0	0	0	0	0	0	0	0	0	0	1	0	0	0	0	0	0
BnaA01g17400D	1.81	2.75	1.28	0.89	22.67	38.33	17.67	13.67	1.18	1.45	2.8	2.13	2.71	3.41	1.23	1.68	0.92	0.78	1.19	0.7	16	17	35	25	39	51	17	22	14	13	18	10
BnaA01g17410D	3.29	3.88	3.68	4.75	95.84	124.25	118.5	168.18	3.47	2.41	3.99	2.6	6.01	3.02	3.28	3.98	3.79	5.04	5.01	4.19	108.16	65	114.35	70.03	198.96	103.75	103.97	119.48	132.04	193.83	173.77	136.93
BnaA01g17420D	17.73	7.38	13.97	7.8	446.37	204	391.5	239.86	18.47	16.58	18.14	6	8.01	8.13	12.93	13.69	15.29	8.58	7.68	7.15	499.62	387.88	451.61	140	230	242	356	356.25	462.25	286.14	230.89	202.56
BnaA01g17430D	0	0	0	0	0	0	0	0	0	0	0	0	0	0	0	0	0	0	0	0	0	0	0	0	0	0	0	0	0	0	0	0
BnaA01g17440D	0.22	0.03	0.34	0	2.33	0.33	4	0	0.36	0.1	0.19	0	0	0.08	0.09	0.28	0.64	0	0	0	4	1	2	0	0	1	1	3	8	0	0	0
BnaA01g17450D	3.43	1.88	3.3	1.25	125.14	75.33	133.21	54.35	3.47	3.23	3.6	1.69	1.39	2.57	3.56	3.37	2.98	0.81	1.26	1.68	135.88	109.55	130	57	58	111	142	127	130.64	39	55.04	69
BnaA01g17460D	3.96	6.12	4.52	0.96	68.9	119	87.47	20.41	3.91	4.43	3.55	3.46	9.58	5.32	4.24	4.87	4.45	0.95	0.87	1.07	73.39	72	61.31	56	191	110	81	88	93.41	22	18.24	21
BnaA01g17470D	0	0	0	0	0	0	0	0	0	0	0	0	0	0	0	0	0	0	0	0	0	0	0	0	0	0	0	0	0	0	0	0
BnaA01g17480D	0.12	0.04	0.23	0.05	2.69	1.06	5.93	1.33	0.08	0.14	0.13	0	0.07	0.04	0.12	0.37	0.2	0	0.14	0	2	3	3.06	0	2	1.19	3.18	9	5.61	0	4	0
BnaA01g17490D	2.57	0.89	2.74	1.22	237.76	90.11	280.75	135.65	2.45	2.47	2.8	0.83	0.59	1.25	2.62	3.03	2.58	0.9	1.63	1.12	243.79	212.8	256.7	71.61	62.09	136.64	265.14	289.68	287.42	109.87	180.02	117.06
BnaA01g17500D	1.69	1.15	2.43	0.88	33.11	25.09	53.06	20.86	1.97	1.66	1.45	0.59	1.81	1.05	2.43	2.12	2.75	0.95	0.61	1.09	41.26	30.11	27.95	10.72	40.25	24.29	51.8	42.86	64.51	24.48	14.14	23.97
BnaA01g17510D	3.11	2.77	2.72	3.56	126.45	120.22	123.93	176.64	3.36	3.28	2.68	3.52	2.18	2.62	2.16	2.72	3.29	3.87	3.33	3.47	146.98	124.3	108.07	132.95	101.26	126.44	96.2	114.51	161.07	209.04	161.95	158.93
BnaA01g17520D	0	0	0	0	0	0	0	0	0	0	0	0	0	0	0	0	0	0	0	0	0	0	0	0	0	0	0	0	0	0	0	0
BnaA01g17530D	0.14	0	0.1	0	1.33	0	1	0	0.2	0	0.22	0	0	0	0.3	0	0	0	0	0	2	0	2	0	0	0	3	0	0	0	0	0
BnaA01g17540D	3.59	0.03	2.56	0	61.98	0.67	50	0	3.48	2.41	4.89	0	0.1	0	2.35	1.5	3.83	0	0	0	64.3	38.57	83.07	0	2	0	44.2	26.66	79.15	0	0	0
BnaA01g17550D	6.17	3.97	8.14	6.5	231.78	161.71	339.22	297.13	5.55	6.29	6.68	4.25	3.26	4.39	9.32	8.19	6.91	5.74	7.37	6.4	225.21	220.83	249.3	148.81	140.2	196.11	384.73	319.74	313.18	286.89	332.46	272.04
BnaA01g17560D	19.32	41.16	23.19	44.13	394.27	904.02	524.37	1098.84	21.29	19.76	16.9	44.86	39.5	39.11	24.01	23.3	22.26	48.54	41.25	42.6	467	374.78	341.04	848.51	919.34	944.22	535.76	491.6	545.75	1312.45	1005.53	978.54
BnaA01g17570D	322.63	209.17	640.71	288.94	6865.52	4691.66	15266.4	7566.28	353.42	415.12	199.36	305.79	142.17	179.54	407.92	740.86	773.35	332.92	275.43	258.47	8125.13	8253.88	4217.55	6062.95	3468.61	4543.41	9541.68	16383.7	19873.9	9436.38	7038.19	6224.26
BnaA01g17580D	10.24	6.56	10.79	4.6	441.86	312.39	515.8	243.3	10.42	10.45	9.85	4.91	8.04	6.72	12.07	10.73	9.56	5.23	4.48	4.09	484.33	420.09	421.17	196.72	396.55	343.9	570.93	479.67	496.8	299.47	231.38	199.06
BnaA01g17590D	0.06	0.24	0.13	0.16	1.09	4.53	2.39	3.18	0.18	0	0	0.15	0.27	0.3	0.28	0.12	0	0	0.42	0.06	3.26	0	0	2.39	5.2	5.99	5.12	2.06	0	0	8.47	1.06
BnaA01g17600D	0.21	0.13	0.12	0.24	5.08	3.42	3.33	7.16	0.11	0.22	0.3	0.18	0.22	0	0.22	0.08	0.07	0.31	0.22	0.18	3.03	5	7.22	4.05	6.22	0	6	2	2	10.06	6.41	5
BnaA01g17610D	1.86	0.15	2.57	0.15	24	2.33	36.67	2.33	1.21	1.97	2.39	0	0.4	0.06	2.51	3.69	1.52	0.06	0.38	0	17	24	31	0	6	1	36	50	24	1	6	0
BnaA01g17620D	0	0.03	0	0.07	0	0.33	0	1	0	0	0	0.09	0	0	0	0	0	0.07	0.14	0	0	0	0	1	0	0	0	0	0	1	2	0
BnaA01g17630D	24.71	8.54	26.52	9.24	746.14	281	883.33	336.33	24.63	22.12	27.38	8.07	7.78	9.77	26.73	29.72	23.12	7.32	10.61	9.79	799.41	621	818	226	268	349	883	928	839	293	383	333
BnaA01g17640D	0	0	0	0	0	0	0	0	0	0	0	0	0	0	0	0	0	0	0	0	0	0	0	0	0	0	0	0	0	0	0	0
BnaA01g17650D	0	0.02	0.02	0	0	0.67	0.67	0	0	0	0	0	0	0.05	0.05	0	0	0	0	0	0	0	0	0	0	2	2	0	0	0	0	0
BnaA01g17660D	2.98	3.85	2.29	2.21	29	40.33	24.67	26.33	2.28	2.63	4.02	4.95	1.34	5.25	2.8	2.37	1.7	2.15	2.3	2.17	24	24	39	45	15	61	30	24	20	28	27	24
BnaA01g17670D	0	0	0	0	0	0	0	0	0	0	0	0	0	0	0	0	0	0	0	0	0	0	0	0	0	0	0	0	0	0	0	0
BnaA01g17680D	0.02	0	0.08	0.13	0.33	0	1.33	2.67	0.06	0	0	0	0	0	0.12	0	0.11	0.29	0.11	0	1	0	0	0	0	0	2	0	2	6	2	0
BnaA01g17690D	27.81	24.37	26.26	16.69	870.02	828.76	912.88	639.55	29.18	29.68	24.58	23.47	27.48	22.17	24.35	27.72	26.7	18.43	16.97	14.66	983.12	864.75	762.19	681.82	982.4	822.07	834.71	898.48	1005.45	765.7	635.62	517.34
BnaA01g17700D	2.3	2.44	3.07	1.22	31.91	37.94	46.61	20.33	2.42	1.79	2.68	1.17	3.41	2.75	4.23	3.06	1.93	1.15	0.85	1.67	36	23	36.73	15	53.82	45	64	43.82	32	21	14	26
BnaA01g17710D	2.16	4.41	1.4	3.94	21.33	48.33	15	47	1.88	1.52	3.07	3.16	4.17	5.9	1.76	1.76	0.67	3.28	4.4	4.13	20	14	30	29	47	69	19	18	8	43	52	46
BnaA01g17720D	10.79	3.27	10.3	3.27	546.5	177.54	579.01	200.05	10.26	10.62	11.49	3.95	2.93	2.94	8.57	11.96	10.36	2.55	3.97	3.28	560.54	501.68	577.29	186	169.91	176.7	476.44	628.32	632.28	171.83	240.84	187.48
BnaA01g17730D	0	0	0	0	0	0	0	0	0	0	0	0	0	0	0	0	0	0	0	0	0	0	0	0	0	0	0	0	0	0	0	0
BnaA01g17740D	3.37	1.89	2.54	2.35	127.63	79	106.04	108.15	3.26	2.93	3.91	1.45	2.24	1.98	2.1	3.07	2.44	2.19	2.46	2.41	133	103.41	146.48	51	97	89	87	120.12	111	110.19	111.44	102.82
BnaA01g17750D	6.31	10.09	5.9	4.25	181.66	319.07	189.29	150.74	6.3	6.65	5.99	8.5	11.41	10.35	6.19	5.51	5.99	4.86	4.63	3.27	195.44	178.55	171	227.56	375.96	353.69	195.45	164.61	207.81	186.2	159.72	106.29
BnaA01g17760D	4.42	2.82	4.6	2.72	128.52	89.3	147.86	96.79	3.87	4.31	5.07	2.8	2.79	2.86	4.52	5.56	3.72	2.75	2.8	2.61	121.62	117.25	146.68	76	92.94	98.96	144.64	168.16	130.77	106.52	98	85.86
BnaA01g17770D	0.1	0	0.03	0.02	1.91	0	0.67	0.41	0	0.15	0.15	0	0	0	0	0	0.08	0	0.05	0	0	2.72	3	0	0	0	0	0	2	0	1.22	0
BnaA01g17780D	2.76	0.89	2.38	0.96	32.33	11.67	30.33	13.33	3.65	0.94	3.7	0.28	1.22	1.18	1.36	2.95	2.83	0.66	1.61	0.62	45	10	42	3	16	16	17	35	39	10	22	8
BnaA01g17790D	0.96	0.34	0.59	0.12	12.67	5	9	2	0.42	0.72	1.73	0.32	0.26	0.44	0.61	0.43	0.74	0.11	0.19	0.07	6	9	23	4	4	7	9	6	12	2	3	1
BnaA01g17800D	0.1	0.83	0.07	0.15	1.67	14.66	1.33	2.96	0.11	0.13	0.06	1.03	0.94	0.51	0	0.06	0.15	0.05	0.14	0.27	2	2	1	15.99	18	10	0	1	3	1	2.89	5
BnaA01g17810D	2.36	1.17	3.14	1.24	43.33	24	64.33	27.81	2.32	2.91	1.86	0.82	0.95	1.74	4.21	2.51	2.7	1.22	1.09	1.41	46	50	34	14	20	38	85	48	60	30	24	29.42
BnaA01g17820D	0.13	0	0.03	0	1.33	0	0.33	0	0	0.4	0	0	0	0	0.09	0	0	0	0	0	0	4	0	0	0	0	1	0	0	0	0	0
BnaA01g17830D	2.54	4.88	2.13	1.59	37.55	81.08	35.46	29.49	2.48	3.7	1.45	2.96	6.83	4.85	3	1.39	2	2.19	1.43	1.16	39.78	51.4	21.48	41.05	116.46	85.74	49.06	21.46	35.85	43.41	25.49	19.58
BnaA01g17840D	0.06	0.03	0.07	0.02	1	0.67	1.33	0.33	0.12	0	0.06	0	0.05	0.05	0.17	0	0.05	0	0	0.06	2	0	1	0	1	1	3	0	1	0	0	1
BnaA01g17850D	0	0	0.04	0	0	0	0.67	0	0	0	0	0	0	0	0.13	0	0	0	0	0	0	0	0	0	0	0	2	0	0	0	0	0
BnaA01g17860D	99.04	11.3	26.54	15.01	3113.35	390.67	943.46	579.37	87.3	136.84	72.97	11.28	10.4	12.23	8.12	35.45	36.06	13.6	16.74	14.69	2989	4051.92	2299.14	333	378	461	283	1167.37	1380	574	637.1	527
BnaA01g17870D	0.15	0.08	0.05	0.08	3.67	2	1.33	2.33	0.27	0.09	0.08	0.05	0.15	0.04	0.04	0.08	0.03	0.06	0.11	0.07	7	2	2	1	4	1	1	2	1	2	3	2
BnaA01g17880D	0.1	0	0.1	0.06	0.8	0	1.01	0.7	0	0.3	0	0	0	0	0	0	0.29	0.18	0	0	0	2.4	0	0	0	0	0	0	3.03	2.11	0	0
BnaA01g17890D	13.13	9.26	14.37	9.85	250.25	192.61	303.45	228.55	13.17	12.35	13.88	8.39	9.52	9.86	13.78	15.27	14.05	10.04	9.96	9.54	270.04	218.94	261.76	148.3	207.07	222.46	287.44	301	321.92	253.82	226.92	204.91
BnaA01g17900D	0.11	0.2	0.14	0.61	2.67	5.33	4	18.33	0.11	0.13	0.08	0.26	0.07	0.27	0.07	0.12	0.23	0.52	0.71	0.61	3	3	2	6	2	8	2	3	7	17	21	17
BnaA01g17910D	0.79	0.47	0.65	0.48	19.33	12	17	14.33	0.92	0.49	0.96	0.58	0.33	0.49	0.53	1.08	0.34	0.65	0.31	0.48	24	11	23	13	9	14	14	27	10	21	9	13
BnaA01g17920D	0	0	0	0	0	0	0	0	0	0	0	0	0	0	0	0	0	0	0	0	0	0	0	0	0	0	0	0	0	0	0	0
BnaA01g17930D	63.41	58.17	77.71	56.3	949.51	933.32	1293.77	1026.41	71.52	64.91	53.8	64.49	64.69	45.32	64.11	81.91	87.12	61.12	50.74	57.05	1149.91	902.62	795.99	894.19	1103.67	802.1	1048.79	1266.83	1565.68	1211.62	906.75	960.85
BnaA01g17940D	11.32	81.76	39.15	153.22	522.03	4098.02	1994.11	8553.81	12.38	12.31	9.26	82.36	69.69	93.24	37.58	45.06	34.81	138.78	150.59	170.28	614.45	528.76	422.89	3526.7	3671.73	5095.63	1898.36	2152.02	1931.96	8495.23	8310.44	8855.76
BnaA01g17950D	8.82	2.69	3.82	1.88	188.36	63.29	90.8	48.72	9.52	9.17	7.77	1.96	4.14	1.98	3.16	4	4.29	1.72	2.01	1.92	218.67	182.25	164.17	38.86	101	50	73.77	88.48	110.16	48.66	51.29	46.22
BnaA01g17960D	6.79	5.19	4.29	6.7	99.9	83.34	70.33	121.16	6.22	7.77	6.39	5.1	5.48	4.99	4.26	4.44	4.16	7.21	7.18	5.7	99	107	93.7	70	92.55	87.47	69	68	74	141.48	127	95
BnaA01g17970D	0	0	0	0	0	0	0	0	0	0	0	0	0	0	0	0	0	0	0	0	0	0	0	0	0	0	0	0	0	0	0	0
BnaA01g17980D	9.24	3.15	11.86	3.5	164.67	60.67	235	75	9.93	8.7	9.09	3.21	3.3	2.94	10.79	11.85	12.95	2.84	3.67	3.99	190	144	160	53	67	62	210	218	277	67	78	80
BnaA01g17990D	30.3	19.1	27.75	18.77	917.8	635.48	936.33	694.67	28.26	32.19	30.45	16.77	20.84	19.68	24.86	30.58	27.82	18.41	19.68	18.23	924.96	911.28	917.15	473.45	724	709	828	963	1018	743	716	625
BnaA01g18000D	0.08	0.26	0.18	0.5	1	4	2.67	7.67	0	0.08	0.15	0	0.33	0.45	0.49	0	0.06	0.29	0.26	0.95	0	1	2	0	5	7	7	0	1	5	4	14
BnaA01g18010D	6.79	2.22	6.27	2.47	182.6	65.85	187.79	80.62	7.1	6.69	6.59	1.76	2.23	2.67	5.03	6.6	7.18	2.36	2.52	2.54	205.39	167.18	175.24	44	68.54	85	147.87	183.49	232	84	81	76.85
BnaA01g18020D	0	0	0	0	0	0	0	0	0	0	0	0	0	0	0	0	0	0	0	0	0	0	0	0	0	0	0	0	0	0	0	0
BnaA01g18030D	6.83	4.21	6.69	3.71	96.04	62.94	104.36	63.1	6.99	7.55	5.96	5.34	4.17	3.12	5.67	7.79	6.61	3.26	3.68	4.18	106	99	83.11	69.83	67	52	87.48	113.61	112	60.92	62	66.38
BnaA01g18040D	0.45	0.23	0.25	0.2	14.56	8	8.98	7.9	0.5	0.24	0.62	0.2	0.19	0.29	0.23	0.24	0.29	0.21	0.26	0.14	17	7.09	19.6	6	7	11	8	8	10.94	9	9.69	5
BnaA01g18050D	1.33	0.87	1.77	1.21	15.33	11	22	16.33	1.47	0.38	2.13	0.66	0.23	1.71	1.53	2.38	1.39	0.66	1.18	1.79	18	4	24	7	3	23	19	28	19	10	16	23
BnaA01g18060D	0.16	0.02	0.11	0.02	6.69	1	5	1	0.26	0.09	0.12	0	0.06	0	0.24	0.05	0.04	0	0.04	0.02	11.71	3.36	5	0	3	0	11	2	2	0	2	1
BnaA01g18070D	2.98	1.6	1.86	1.59	61.45	35.05	41.38	39.35	3.74	2.41	2.79	1.78	1.46	1.55	1.67	2.64	1.26	1.39	2.03	1.34	82.19	45.73	56.43	33.68	34.04	37.43	37.3	55.91	30.92	37.7	49.54	30.82
BnaA01g18080D	0.63	0.1	0.55	0.23	19.22	3.67	18.67	8.67	0.57	0.72	0.59	0	0.14	0.16	0.53	0.78	0.35	0.24	0.27	0.17	19	20.66	18	0	5	6	18	25	13	10	10	6
BnaA01g18090D	0	0	0	0	0	0	0	0	0	0	0	0	0	0	0	0	0	0	0	0	0	0	0	0	0	0	0	0	0	0	0	0
BnaA01g18100D	0	0	0	0	0	0	0	0	0	0	0	0	0	0	0	0	0	0	0	0	0	0	0	0	0	0	0	0	0	0	0	0
BnaA01g18110D	0	0	0	0	0	0	0	0	0	0	0	0	0	0	0	0	0	0	0	0	0	0	0	0	0	0	0	0	0	0	0	0
BnaA01g18120D	0	0	0	0	0	0	0	0	0	0	0	0	0	0	0	0	0	0	0	0	0	0	0	0	0	0	0	0	0	0	0	0
BnaA01g18130D	3.65	3.35	2.83	4.41	80.67	82.33	70	117.67	3.86	3.89	3.19	2.29	3.84	3.93	2.93	2.49	3.08	3.3	5.4	4.53	92	80	70	47	97	103	71	57	82	97	143	113
BnaA01g18140D	0	0	0	0	0	0	0	0	0	0	0	0	0	0	0	0	0	0	0	0	0	0	0	0	0	0	0	0	0	0	0	0
BnaA01g18150D	0	0	0	0	0	0	0	0	0	0	0	0	0	0	0	0	0	0	0	0	0	0	0	0	0	0	0	0	0	0	0	0
BnaA01g18160D	89.89	44.49	29.32	38.36	3413.59	1856.52	1253.17	1798.54	72.24	100.42	97	40.67	54.09	38.7	27.02	28.49	32.45	42.59	37.58	34.91	2978.76	3581.18	3680.84	1446.19	2366.81	1756.55	1133.62	1130.05	1495.85	2165.31	1722.34	1507.98
BnaA01g18170D	6.66	8.14	6.69	2.18	82.92	111.54	92.87	33.46	7.26	6.78	5.94	5.96	11.28	7.18	6.87	5.9	7.3	3.24	0.85	2.44	97.19	78.44	73.14	68.74	160.15	105.72	93.57	75.91	109.13	53.53	12.71	34.15
BnaA01g18180D	33.12	5.59	14.55	5.7	907.38	166.94	447.27	190.08	27.68	32.81	38.87	5.54	6	5.22	12.99	14.31	16.35	4.48	7.64	4.98	820.51	841.26	1060.38	141.71	188.67	170.43	391.82	408.21	541.79	163.81	251.89	154.54
BnaA01g18190D	0.31	0.03	0.09	0.14	3.33	0.33	1	2	0.08	0.29	0.55	0	0	0.08	0.08	0.18	0	0.27	0.15	0	1	3	6	0	0	1	1	2	0	4	2	0
BnaA01g18200D	0	0	0	0	0	0	0	0	0	0	0	0	0	0	0	0	0	0	0	0	0	0	0	0	0	0	0	0	0	0	0	0
BnaA01g18210D	0.34	0.29	0.23	0.24	10.67	10	7.67	9	0.36	0.28	0.39	0.21	0.39	0.27	0.26	0.31	0.11	0.19	0.16	0.37	12	8	12	6	14	10	9	10	4	8	6	13
BnaA01g18220D	0	0	0	0	0	0	0	0	0	0	0	0	0	0	0	0	0	0	0	0	0	0	0	0	0	0	0	0	0	0	0	0
BnaA01g18230D	0	0	0	0	0	0	0	0	0	0	0	0	0	0	0	0	0	0	0	0	0	0	0	0	0	0	0	0	0	0	0	0
BnaA01g18240D	0	0	0	0	0	0	0	0	0	0	0	0	0	0	0	0	0	0	0	0	0	0	0	0	0	0	0	0	0	0	0	0
BnaA01g18250D	0	0	0	0	0	0	0	0	0	0	0	0	0	0	0	0	0	0	0	0	0	0	0	0	0	0	0	0	0	0	0	0
BnaA01g18260D	0.04	0	0	0	0.33	0	0	0	0.13	0	0	0	0	0	0	0	0	0	0	0	1	0	0	0	0	0	0	0	0	0	0	0
BnaA01g18270D	0.3	13.97	0.2	9.78	8.67	440.33	6	343.67	0.16	0.04	0.7	11.45	16.17	14.29	0.1	0.37	0.12	11.89	6.73	10.72	5	1	20	305	530	486	3	11	4	453	231	347
BnaA01g18280D	1.39	1.59	3.26	2.7	41.01	53	106.49	96.02	1.63	1.43	1.12	0.48	2.54	1.76	2.66	3.4	3.71	2.91	1.88	3.31	51.5	38.96	32.56	13	85	61	85.32	103.28	130.87	113	65.78	109.29
BnaA01g18290D	0	0	0	0	0	0	0	0	0	0	0	0	0	0	0	0	0	0	0	0	0	0	0	0	0	0	0	0	0	0	0	0
BnaA01g18300D	0	0	0	0	0	0	0	0	0	0	0	0	0	0	0	0	0	0	0	0	0	0	0	0	0	0	0	0	0	0	0	0
BnaA01g18310D	0	0	0	0	0	0	0	0	0	0	0	0	0	0	0	0	0	0	0	0	0	0	0	0	0	0	0	0	0	0	0	0
BnaA01g18320D	6.69	2.48	8.35	4.88	198.35	80.93	274.59	175.64	5.74	7.3	7.02	2.33	1.66	3.44	8.97	9.37	6.7	3.33	6.75	4.56	184.5	202.88	207.68	64.5	56.55	121.73	293.33	289.75	240.68	131.85	241.36	153.72
BnaA01g18330D	1.43	0.39	0.62	0.42	19.33	6	9.33	7	1.16	1.27	1.86	0.08	0.65	0.44	0.74	0.57	0.55	0.5	0.12	0.65	17	16	25	1	10	7	11	8	9	9	2	10
BnaA01g18340D	1.62	2.24	2.35	2.19	87	127.67	139.67	142	1.61	1.66	1.6	2.92	1.54	2.27	2.88	2.07	2.09	1.8	2.43	2.35	93	83	85	145	94	144	169	115	135	128	156	142
BnaA01g18350D	2.4	2.88	2.76	1.61	26.02	34.33	33.33	21.33	2.56	3.26	1.39	2.57	2.66	3.41	1.76	3.55	2.98	1.66	1.46	1.71	30	33.05	15	26	33	44	21	40	39	24	19	21
BnaA01g18360D	5.3	2.89	4.97	2.07	250.7	148.62	260.46	119.45	5.78	5.29	4.84	2.87	2.32	3.49	5.02	4.95	4.94	2.17	2.37	1.68	293.43	232.57	226.09	125.85	125	195	259.36	241.65	280.36	135.6	133.57	89.18
BnaA01g18370D	0	0	0	0	0	0	0	0	0	0	0	0	0	0	0	0	0	0	0	0	0	0	0	0	0	0	0	0	0	0	0	0
BnaA01g18380D	12.16	4.49	8.9	3.94	186.71	76.84	151.42	73.67	12.12	12.66	11.69	3.07	4.23	6.17	7.71	10.37	8.61	4.15	2.98	4.69	200.69	181.28	178.16	43.83	74.29	112.4	129.8	165.21	159.26	84.73	54.91	81.36
BnaA01g18390D	8.54	17	6.27	12.38	101.33	219	82	179.22	9.24	8.88	7.49	16.53	18.16	16.3	7.47	6.43	4.91	14.07	9.09	13.99	118	98	88	182	246	229	97	79	70	221.51	129.03	187.13
BnaA01g18400D	0.89	4.28	2.47	1.14	20	110.33	62.33	32.67	0.57	0.99	1.1	1.37	8.51	2.96	2.6	2.54	2.26	1.81	0.77	0.85	14	21	25	29	222	80	65	60	62	55	21	22
BnaA01g18410D	48.25	24.97	56.4	18.1	1035.1	589.17	1348.85	474.16	44.26	53.22	47.26	23.1	20.64	31.18	62.37	54.82	52.01	17.28	18.82	18.19	1027.36	1068.37	1009.56	462.39	508.36	796.77	1473.01	1224.12	1349.41	494.55	485.68	442.24
BnaA01g18420D	0	0	0	0	0	0	0	0	0	0	0	0	0	0	0	0	0	0	0	0	0	0	0	0	0	0	0	0	0	0	0	0
BnaA01g18430D	7	4.79	6.73	3.68	140.99	104.53	150.34	90.43	7.57	7.27	6.16	4.76	4.96	4.64	5.4	7.73	7.06	3.87	3.82	3.34	163.88	136.24	122.84	89	114.06	110.52	119	161.14	170.88	103.44	92	75.85
BnaA01g18440D	3.8	11.36	4.82	13.36	24.67	75.33	34.33	105.33	4.61	3.66	3.13	19.36	9.09	5.62	5.09	5.39	3.99	13.54	15.54	10.99	32	22	20	116	67	43	36	36	31	116	120	80
BnaA01g18450D	13.25	27.91	17.28	31.57	608.65	1371.18	878.95	1772.46	13.86	15.28	10.61	33.95	27.19	22.58	18.66	18.34	14.83	32.49	32.01	30.21	686.82	655.12	484.02	1451.02	1430.37	1232.16	941.13	874.18	821.55	1985.35	1763.72	1568.32
BnaA01g18460D	4.17	1.62	4.2	0.99	65	27.67	73.11	18.38	4.54	4.21	3.76	1.39	1.13	2.33	4.4	3.48	4.72	0.53	1.57	0.86	76	61	58	20.01	20	43	75	56.06	88.26	11	29.15	15
BnaA01g18470D	10.6	4.36	7.62	3.65	196.67	90	158.33	81.67	10.11	12.44	9.26	3.41	3.1	6.56	7.54	7.3	8.02	2.67	3.94	4.33	203	216	171	59	66	145	154	141	180	66	88	91
BnaA01g18480D	2.83	2.34	2.55	1.13	133.86	122.95	132.72	65.48	3.34	2.68	2.47	1.28	3.52	2.22	2.36	2.83	2.45	1.3	1.15	0.95	169.16	117.41	115	55.86	189	124	121.48	137.67	139	81	65	50.44
BnaA01g18490D	0	0	0	0	0	0	0	0	0	0	0	0	0	0	0	0	0	0	0	0	0	0	0	0	0	0	0	0	0	0	0	0
BnaA01g18500D	0	0	0	0	0	0	0	0	0	0	0	0	0	0	0	0	0	0	0	0	0	0	0	0	0	0	0	0	0	0	0	0
BnaA01g18510D	0.03	0	0	0	0.33	0	0	0	0.08	0	0	0	0	0	0	0	0	0	0	0	1	0	0	0	0	0	0	0	0	0	0	0
BnaA01g18520D	0	0	0	0	0	0	0	0	0	0	0	0	0	0	0	0	0	0	0	0	0	0	0	0	0	0	0	0	0	0	0	0
BnaA01g18530D	3.97	27.33	4.43	3.48	102.67	791.75	129	111	3.41	5.3	3.21	17.81	39.01	25.16	3.6	4.69	4.99	3.89	2.72	3.84	96	129	83	432	1164.26	779	103	127	157	135	85	113
BnaA01g18540D	0.05	0.01	0.16	0	2.38	0.35	8.03	0	0.02	0.12	0.02	0	0	0.02	0.3	0.15	0.04	0	0	0	1.07	4.97	1.1	0	0	1.05	15	7.1	2	0	0	0
BnaA01g18550D	5.99	1.77	5.59	1.52	105.67	34	108.67	32.67	6.23	5.43	6.31	1.77	1.49	2.06	5.4	6.37	5.01	1.41	1.8	1.36	118	89	110	29	30	43	104	116	106	33	38	27
BnaA01g18560D	0.04	0.05	0.11	0.18	0.53	0.66	1.79	2.88	0	0.13	0	0.07	0.07	0	0	0	0.34	0.19	0.19	0.16	0	1.58	0	0.9	1.07	0	0	0	5.38	3.23	3	2.4
BnaA01g18570D	0.36	0.3	0.53	0.39	8.74	7.47	14	11	0.55	0.19	0.34	0.39	0.15	0.36	0.51	0.49	0.6	0.32	0.32	0.53	14	4.21	8	8.42	4	10	13	12	17	10	9	14
BnaA01g18580D	0.74	0.76	0.96	1	29.38	33.74	42.33	48.21	0.71	0.97	0.55	0.56	0.94	0.79	0.82	1.26	0.81	0.76	1.21	1.03	30.6	35.93	21.62	20.89	43	37.32	36	52	39	40.53	57.65	46.46
BnaA01g18590D	0.12	0.13	0.09	0	2.15	3.02	2.12	0	0	0.36	0	0	0	0.39	0	0	0.27	0	0	0	0	6.45	0	0	0	9.05	0	0	6.37	0	0	0
BnaA01g18600D	0	0	0	0	0	0	0	0	0	0	0	0	0	0	0	0	0	0	0	0	0	0	0	0	0	0	0	0	0	0	0	0
BnaA01g18610D	0	0	0	0	0	0	0	0	0	0	0	0	0	0	0	0	0	0	0	0	0	0	0	0	0	0	0	0	0	0	0	0
BnaA01g18620D	0	0	0	0	0	0	0	0	0	0	0	0	0	0	0	0	0	0	0	0	0	0	0	0	0	0	0	0	0	0	0	0
BnaA01g18630D	3.02	1.25	2.58	1.29	104.4	48.13	98.39	54.67	3.05	2.62	3.4	0.79	1.22	1.74	2.22	3.11	2.41	1.31	1.62	0.95	113.09	84	116.12	25.3	48	71.1	84	111.17	100	60	67	37
BnaA01g18640D	0.2	0	0.09	0.07	5	0	2.69	2	0.26	0.29	0.04	0	0	0	0.04	0.11	0.13	0	0.2	0	7	7	1	0	0	0	1	3	4.08	0	6	0
BnaA01g18650D	0.06	0	0	0.05	1.33	0	0	1.33	0.04	0	0.13	0	0	0	0	0	0	0	0.14	0	1	0	3	0	0	0	0	0	0	0	4	0
BnaA01g18660D	0.18	0.07	0.03	0.02	3.67	1.67	0.67	0.67	0	0.5	0.05	0	0	0.2	0	0.09	0	0.07	0	0	0	10	1	0	0	5	0	2	0	2	0	0
BnaA01g18670D	19.25	6.49	7.9	7.16	363.22	134.48	167.81	165.27	14.71	25.59	17.44	6.53	7.11	5.82	2.96	11.2	9.53	6.28	6.48	8.71	303	456	330.67	116	155.44	132	62	222	219.43	159.55	148.27	188
BnaA01g18680D	0	0.82	0	0.22	0	4	0	1.33	0	0	0	1.16	1.13	0.18	0	0	0	0.48	0	0.19	0	0	0	5	6	1	0	0	0	3	0	1
BnaA01g18690D	2.43	1.26	2.27	0.97	73.39	41.84	75.59	35.92	2.19	2.2	2.89	1.03	1.26	1.48	1.78	3.01	2.01	1.12	0.86	0.93	71.52	62	86.64	29	43.51	53	58.93	94.48	73.36	45	31	31.76
BnaA01g18700D	0	0.01	0	0	0	0.67	0	0.33	0	0	0	0.04	0	0	0	0	0	0	0	0.01	0	0	0	2	0	0	0	0	0	0	0	1
BnaA01g18710D	0	0	0.02	0	0	0	0.33	0	0	0	0	0	0	0	0.05	0	0	0	0	0	0	0	0	0	0	0	1	0	0	0	0	0
BnaA01g18720D	0	0	0	0	0	0	0	0	0	0	0	0	0	0	0	0	0	0	0	0	0	0	0	0	0	0	0	0	0	0	0	0
BnaA01g18730D	3.54	2.55	3.84	2.87	430.14	337.26	517.49	427.97	3.25	3.89	3.48	2.59	2.67	2.38	3.65	4.46	3.4	2.67	3.59	2.36	427.34	442.21	420.87	293.61	372.71	345.45	488.78	564.21	499.47	433.49	524.71	325.72
BnaA01g18740D	0.05	0.12	0.02	0.02	0.67	2	0.33	0.33	0	0.15	0	0	0	0.36	0	0.07	0	0	0.06	0	0	2	0	0	0	6	0	1	0	0	1	0
BnaA01g18750D	5.83	1.2	6.79	1.48	100.14	22.55	129.91	30.65	5.65	5.33	6.52	0.94	1.87	0.79	5.74	6.98	7.65	1.23	1.46	1.75	104.34	85.2	110.88	15	36.66	16	107.82	123.95	157.95	28.1	29.92	33.93
BnaA01g18760D	0.45	0.2	0.07	0.12	4	2	0.67	1.33	0.65	0.12	0.59	0	0.31	0.29	0.11	0	0.1	0.35	0	0	6	1	5	0	3	3	1	0	1	4	0	0
BnaA01g18770D	4.19	1.88	5.04	1.19	164.32	80.27	219.1	56.69	4.21	4.92	3.44	1.88	1.94	1.81	4.93	5.78	4.4	0.92	1.45	1.21	178.4	180.47	134.08	68.93	87.43	84.44	212.58	235.89	208.83	48	68.52	53.56
BnaA01g18780D	0	0	0	0	0	0	0	0	0	0	0	0	0	0	0	0	0	0	0	0	0	0	0	0	0	0	0	0	0	0	0	0
BnaA01g18790D	0	0	0	0.01	0	0	0	0.33	0	0	0	0	0	0	0	0	0	0.03	0	0	0	0	0	0	0	0	0	0	0	1	0	0
BnaA01g18800D	0.49	0.27	0.27	0.27	8	4.67	5	5.33	0.62	0.59	0.25	0.39	0.27	0.15	0.11	0.3	0.41	0.28	0.2	0.33	11	9	4	6	5	3	2	5	8	6	4	6
BnaA01g18810D	0	0	0	0	0	0	0	0	0	0	0	0	0	0	0	0	0	0	0	0	0	0	0	0	0	0	0	0	0	0	0	0
BnaA01g18820D	0	0	0	0	0	0	0	0	0	0	0	0	0	0	0	0	0	0	0	0	0	0	0	0	0	0	0	0	0	0	0	0
BnaA01g18830D	0	0	0	0	0	0	0	0	0	0	0	0	0	0	0	0	0	0	0	0	0	0	0	0	0	0	0	0	0	0	0	0
BnaA01g18840D	0	0	0	0	0	0	0	0	0	0	0	0	0	0	0	0	0	0	0	0	0	0	0	0	0	0	0	0	0	0	0	0
BnaA01g18850D	0	0	0	0	0	0	0	0	0	0	0	0	0	0	0	0	0	0	0	0	0	0	0	0	0	0	0	0	0	0	0	0
BnaA01g18860D	6.72	5.57	4.84	4.5	192.93	172.73	155.88	157.82	6.09	7.1	6.98	6.22	4.67	5.81	4.76	4.39	5.38	4.57	4.32	4.61	188.97	190.48	199.33	166.42	153.56	198.2	150.17	131	186.47	174.85	148.99	149.61
BnaA01g18870D	37.92	3.24	16.25	1.9	261.8	24.23	124.27	16.01	37.88	34.84	41.05	3.49	1.76	4.46	23.86	12.05	12.83	2.29	1.09	2.32	281.22	223.71	280.47	22.32	13.9	36.48	180.27	86.07	106.48	21	9	18.02
BnaA01g18880D	18.83	19	36.18	20.84	409.34	451.99	871.22	550.5	22.21	21.58	12.69	15.74	23.88	17.37	35.19	38.1	35.25	21.21	19.75	21.56	519.02	436.15	272.86	317.23	592.01	446.72	836.67	856.29	920.7	610.94	512.8	527.75
BnaA01g18890D	17.26	5.73	17.26	6.59	143.33	51	158.33	66	18.52	15.7	17.56	6.64	4.23	6.32	19.86	16.45	15.46	6.37	5.35	8.04	165	121	144	51	40	62	180	141	154	70	53	75
BnaA01g18900D	0.07	0	0.03	0	0.67	0	0.33	0	0	0	0.22	0	0	0	0.1	0	0	0	0	0	0	0	2	0	0	0	1	0	0	0	0	0
BnaA01g18910D	0	0	0	0.06	0	0	0	0.33	0	0	0	0	0	0	0	0	0	0	0	0.17	0	0	0	0	0	0	0	0	0	0	0	1
BnaA01g18920D	23.94	16.7	22.45	15.39	302.49	230.11	312.52	234.03	26.2	18.99	26.63	13.8	19.74	16.55	23.26	22.97	21.11	14.26	14.71	17.19	354.21	222	331.27	160.89	283.19	246.25	319.9	298.65	319	237.63	221	243.45
BnaA01g18930D	1.41	3.49	1.75	3.23	46.7	126.56	65.7	132.03	1.1	1.84	1.29	3.48	4.68	2.31	1.44	1.85	1.97	3.19	3.55	2.95	39.73	57.5	42.86	108.49	179.52	91.68	53	64.39	79.72	141.97	142.59	111.52
BnaA01g18940D	5.31	3.21	2.47	1.99	112.67	75.39	58.17	51.67	6.15	5.29	4.49	2.29	3.4	3.95	2.14	2.6	2.67	2.32	1.98	1.68	140	104	94	45	82.17	99	49.52	57	68	65	50	40
BnaA01g18950D	0.12	0.13	0.04	0.16	2	2.33	0.67	3	0.23	0.07	0.06	0.07	0.17	0.16	0	0.12	0	0.05	0.16	0.28	4	1	1	1	3	3	0	2	0	1	3	5
BnaA01g18960D	0.49	0.27	0.35	0.15	15.82	9.85	12.33	5.67	0.56	0.6	0.31	0.07	0.3	0.43	0.51	0.33	0.21	0.05	0.34	0.06	19.47	18	10	2	11	16.55	18	11	8	2	13	2
BnaA01g18970D	1.13	1.21	1.36	1.64	83.89	97.88	111.85	148	1.16	1.07	1.16	1.06	1.39	1.17	1.57	1.32	1.18	1.57	1.83	1.51	92.8	73.85	85.01	73	118.1	102.55	128	101.75	105.79	155.05	162.17	126.77
BnaA01g18980D	0.05	0	0	0	1	0	0	0	0.05	0.05	0.05	0	0	0	0	0	0	0	0	0	1	1	1	0	0	0	0	0	0	0	0	0
BnaA01g18990D	0.74	4	0.32	0.6	18.67	117.61	9	19.33	0.61	1.29	0.31	0.54	9.6	1.86	0.32	0.34	0.29	0.88	0.58	0.34	17	31	8	13	282.83	57	9	9	9	30	18	10
BnaA01g19000D	0	0	0	0	0	0	0	0	0	0	0	0	0	0	0	0	0	0	0	0	0	0	0	0	0	0	0	0	0	0	0	0
BnaA01g19010D	9.79	11.67	6.52	17.78	134.41	172.47	100.33	300	9.79	10.48	9.1	12.91	13.51	8.59	6.44	5.75	7.37	20.48	17.19	15.66	145	134.24	124	165	212.4	140	97	82	122	374	283	243
BnaA01g19020D	5.47	3.5	7.53	3.09	136.04	95	204.72	90.35	6.76	4.13	5.53	2.98	1.74	5.77	9.54	7.1	5.96	1.72	3.5	4.04	179	94.52	134.59	68	49	168	257	180.76	176.41	56.05	103	112
BnaA01g19030D	2.06	1.33	1.45	0.96	33.73	22.39	26.36	19.19	2.84	1.25	2.09	1.97	1.3	0.72	1.59	0.97	1.8	1.47	0.82	0.58	49.16	18.72	33.3	29.45	23.92	13.81	28	16.22	34.87	31.27	15.74	10.56
BnaA01g19040D	0.22	0.19	0.33	0.19	3.67	3.67	6	4	0.28	0.07	0.31	0	0.48	0.1	0.22	0.36	0.41	0.32	0.26	0	5	1	5	0	9	2	4	6	8	7	5	0
BnaA01g19050D	0	0	0	0	0	0	0	0	0	0	0	0	0	0	0	0	0	0	0	0	0	0	0	0	0	0	0	0	0	0	0	0
BnaA01g19060D	0	0	0	0	0	0	0	0	0	0	0	0	0	0	0	0	0	0	0	0	0	0	0	0	0	0	0	0	0	0	0	0
BnaA01g19070D	0	0	0	0	0	0	0	0	0	0	0	0	0	0	0	0	0	0	0	0	0	0	0	0	0	0	0	0	0	0	0	0
BnaA01g19080D	0	0.02	0.03	0.02	0	0.33	0.33	0.33	0	0	0	0	0	0.07	0	0.08	0	0	0.07	0	0	0	0	0	0	1	0	1	0	0	1	0
BnaA01g19090D	4.45	0.52	2.84	0.69	100.93	13	72.67	19	3.9	4.99	4.47	0.52	0.31	0.74	2.68	2.54	3.31	0.66	0.62	0.78	95.79	106	101	11	8	20	67	60	91	20	17	20
BnaA01g19100D	81.02	78.66	72.09	70.89	1230.2	1291.85	1216.1	1312.93	84.11	84.42	74.54	80.42	90.12	65.43	66.63	76.55	73.1	77.01	59.86	75.81	1375.27	1193.74	1121.6	1134.11	1563.75	1177.69	1108.4	1203.92	1335.98	1552.48	1087.87	1298.44
BnaA01g19110D	18.86	177.43	17.16	76.3	205.65	2137.96	207.29	1021.62	15.7	23.83	17.06	148.67	247.3	136.32	20.37	19.81	11.31	83.68	48.09	97.14	186.28	244.44	186.23	1520.97	3112.95	1779.96	245.88	226	150	1223.86	634	1207
BnaA01g19120D	106.59	8.51	13.75	4.54	2082.59	186.58	302.38	106.65	86.13	128.22	105.41	5.54	11.26	8.73	3.42	19.71	18.11	2.6	4.68	6.35	1830.25	2356.29	2061.24	101.6	253.96	204.18	73.97	402.89	430.27	68.04	110.58	141.32
BnaA01g19130D	0.49	0.23	0.41	0.28	11.35	5.96	10.29	8.07	0.57	0.5	0.41	0.05	0.53	0.11	0.3	0.72	0.22	0.48	0.07	0.29	14	10.63	9.41	1	14	2.88	7.67	17.19	6	14.67	2	7.54
BnaA01g19140D	0.09	0.11	0.16	0.04	1.33	2	2.67	0.67	0	0.07	0.2	0	0.11	0.22	0.06	0.19	0.22	0	0.11	0	0	1	3	0	2	4	1	3	4	0	2	0
BnaA01g19150D	9.48	10.39	5.77	8.18	119.79	143.84	81.44	125.52	9.04	9.66	9.74	9.12	12.03	10.01	6.21	5.23	5.87	7.21	9.04	8.29	123.22	113.89	122.27	107.22	174.1	150.21	86.16	68.64	89.52	121.18	137.02	118.36
BnaA01g19160D	5.22	6.92	4.91	4.66	87.11	126.32	92.1	95.89	4.02	6.36	5.28	7.44	5.78	7.55	3.07	6.16	5.51	5.09	3.69	5.2	73	100	88.34	116.58	111.4	150.99	56.73	107.66	111.92	114.11	74.5	99.05
BnaA01g19170D	3.19	3.66	2.52	3.73	88.51	111.7	77.81	125.15	3.25	2.95	3.37	2.97	3.79	4.22	3.07	1.95	2.53	3.34	4.03	3.81	97	76	92.54	76.54	120.09	138.48	93.11	56	84.33	122.91	133.55	119
BnaA01g19180D	0.54	1.46	0.39	2.83	19	55.67	15.33	119.6	0.67	0.43	0.52	1.33	1.38	1.67	0.37	0.41	0.4	2.67	2.39	3.43	25	14	18	43	55	69	14	15	17	123.79	100	135
BnaA01g19190D	0.08	0.59	0.04	0.46	2.67	21	1.42	18.3	0.11	0.07	0.06	0.66	0.45	0.67	0.03	0.06	0.03	0.46	0.52	0.39	4	2	2	20	17	26	1.18	2	1.07	20	20.37	14.54
BnaA01g19200D	1.38	0.22	1.12	0.4	44.67	8	40.81	15.92	1.14	1.71	1.3	0.2	0.03	0.44	1.19	1.01	1.17	0.44	0.35	0.42	40	52	42	6	1	17	42.57	34	45.86	18.92	13.55	15.28
BnaA01g19210D	15.07	5.51	14.02	4.51	324.28	130	334.46	118.1	14.05	16.35	14.81	5.08	5.47	5.97	12.04	17.11	12.9	4.27	4.3	4.96	326.84	329	317	102	134.99	153	284.94	382.9	335.54	122.43	111.09	120.77
BnaA01g19220D	0	0	0	0	0	0	0	0	0	0	0	0	0	0	0	0	0	0	0	0	0	0	0	0	0	0	0	0	0	0	0	0
BnaA01g19230D	2.29	0.52	0.89	0.35	90.8	21.9	38.45	17.32	2.07	2.16	2.64	0.76	0.27	0.54	1.27	0.94	0.45	0.35	0.4	0.31	88.41	80	104	28	12.09	25.62	55.31	38.5	21.54	18.7	19.15	14.1
BnaA01g19240D	0	0	0	0	0	0	0	0	0	0	0	0	0	0	0	0	0	0	0	0	0	0	0	0	0	0	0	0	0	0	0	0
BnaA01g19250D	0.31	0.13	0.08	0.03	5.67	2.33	1.67	0.57	0.31	0.18	0.45	0.24	0.05	0.09	0.25	0	0	0	0	0.08	6	3	8	4	1	2	5	0	0	0	0	1.7
BnaA01g19260D	6.73	4.59	6.23	4.2	324.24	240.76	331.48	243.58	7.34	6.47	6.37	4.23	4.43	5.1	6.65	6.48	5.56	3.44	4.37	4.8	379.71	289.64	303.36	188.72	243.1	290.46	350.19	322.73	321.51	219.16	251.52	260.07
BnaA01g19270D	21.39	8.82	4.11	14.33	427.01	188.21	93.91	349.53	19.32	26.8	18.04	11.7	7.43	7.33	1.95	3.75	6.63	12.58	15.45	14.97	418.87	502.34	359.81	218.69	170.97	174.98	43	78.11	160.63	336.31	372.28	339.99
BnaA01g19280D	48.69	37.83	38.67	28.78	1155.4	959.3	1014.72	828.97	49.45	48.75	47.87	46.77	28.71	38	45.5	38.36	32.16	28.1	26.2	32.05	1263.44	1077.28	1125.48	1030.68	778.52	1068.71	1182.83	942.78	918.56	885.18	744.01	857.73
BnaA01g19290D	0	0.08	0.05	0.02	0	1	0.67	0.33	0	0	0	0	0.23	0	0	0.08	0.07	0.07	0	0	0	0	0	0	3	0	0	1	1	1	0	0
BnaA01g19300D	19.85	19.67	11.16	10.53	475.65	517.54	296.26	309.64	19.76	18.4	21.4	16.03	22.58	20.4	10.62	12.08	10.78	13.27	7.99	10.32	509.36	410.16	507.42	356.39	617.55	578.67	278.5	299.58	310.69	421.54	228.91	278.48
BnaA01g19310D	0.12	0.03	0.06	0.09	1.77	0.36	1.02	1.67	0	0	0.37	0.08	0	0	0	0	0.17	0.26	0	0	0	0	5.31	1.09	0	0	0	0	3.07	5	0	0
BnaA01g19320D	0	0	0.03	0	0	0	0.33	0	0	0	0	0	0	0	0	0	0.09	0	0	0	0	0	0	0	0	0	0	0	1	0	0	0
BnaA01g19330D	5.58	4.15	5.26	3.59	243.22	198.96	257.14	191.96	5.06	6.28	5.39	3.67	4.47	4.3	5.06	5.06	5.66	3.71	3.44	3.63	238.94	256.59	234.13	149.23	224.11	223.53	243.06	229.65	298.7	215.91	180.72	179.26
BnaA01g19340D	7.2	2.75	7	4.21	110.6	46.16	119.61	78.89	7.37	7.98	6.25	2.49	3.26	2.5	6.33	7.7	6.98	3.94	4.91	3.78	122.19	114.33	95.29	35.54	57.41	45.53	106.75	122.73	129.36	80.6	90.5	65.56
BnaA01g19350D	123.03	26.89	109.77	16.48	986.37	243.69	963.12	156.42	130.78	85.16	153.16	11.23	20.35	49.1	127.35	115.96	85.99	8.23	22.63	18.58	1120.5	631.07	1207.53	83	185	463.07	1110.16	955.66	823.55	86.99	215.54	166.72
BnaA01g19360D	0.03	0	0.12	0	0.33	0	1.67	0	0	0	0.09	0	0	0	0	0.08	0.28	0	0	0	0	0	1	0	0	0	0	1	4	0	0	0
BnaA01g19370D	0	0	0	0	0	0	0	0	0	0	0	0	0	0	0	0	0	0	0	0	0	0	0	0	0	0	0	0	0	0	0	0
BnaA01g19380D	4.17	1.76	4.28	3.11	169.38	76.83	192.09	154.53	4.02	4.33	4.15	2.01	1.69	1.57	3.7	5.47	3.67	3.03	3.55	2.76	176.48	164.26	167.41	76	78.58	75.9	165.34	230.75	180.19	163.83	172.91	126.85
BnaA01g19390D	4.76	7.69	14.02	8.2	197.63	355.85	648.06	412.81	5.28	4.34	4.67	3.95	10.96	8.15	10.19	14.46	17.41	8.1	9.25	7.26	234.73	167	191.17	151.51	517.14	398.9	460.79	618.3	865.1	443.67	456.74	338.02
BnaA01g19400D	29.07	30.6	35.79	30.24	450	510.33	616.67	569.33	29.71	31.73	25.78	34.87	25.69	31.24	39.04	33.88	34.46	28.47	31.64	30.6	496	458	396	502	455	574	663	544	643	586	587	535
BnaA01g19410D	9.93	9.04	13.08	9.23	97.67	97	144.33	110.33	8.17	9.77	11.84	8.93	10.18	8.02	16.52	9.86	12.85	8	9.55	10.13	87	90	116	82	115	94	179	101	153	105	113	113
BnaA01g19420D	0	0	0	0	0	0	0	0	0	0	0	0	0	0	0	0	0	0	0	0	0	0	0	0	0	0	0	0	0	0	0	0
BnaA01g19430D	0	0	0	0	0	0	0	0	0	0	0	0	0	0	0	0	0	0	0	0	0	0	0	0	0	0	0	0	0	0	0	0
BnaA01g19440D	0	0	0	0	0	0	0	0	0	0	0	0	0	0	0	0	0	0	0	0	0	0	0	0	0	0	0	0	0	0	0	0
BnaA01g19450D	5.8	6.48	3.85	4.16	189.37	224.64	140.24	166.75	5.51	6.89	4.99	8.96	5.55	4.93	2.68	4.76	4.1	4.7	3.01	4.76	194.87	210.77	162.48	273.37	208.54	192	96.51	161.9	162.31	205.14	118.55	176.55
BnaA01g19460D	24.09	12	8.08	5.9	484.01	258	181.33	145	24.08	26.03	22.16	14.5	11.48	10.02	8.98	6.95	8.3	6.55	4.98	6.17	522	488.03	442	271	264	239	198	145	201	175	120	140
BnaA01g19470D	0.12	0.08	0.1	0.1	2	1.69	2	2.02	0.11	0.24	0	0	0.2	0.05	0.05	0.16	0.09	0.09	0.05	0.15	2	4	0	0	4.02	1.06	1	3	2.01	2	1.06	3
BnaA01g19480D	0.54	0.92	3.51	1.42	7.26	13	51.11	22.62	0.75	0.57	0.31	1.14	0.4	1.21	4.46	3.83	2.25	1.14	1.18	1.94	10.76	7	4.02	14.01	6	19	64.77	52.68	35.87	20.11	18.78	28.98
BnaA01g19490D	0.17	0.04	0.86	0.46	1.33	0.33	7	4	0.38	0	0.14	0	0.12	0	0.62	1.3	0.67	0.1	0.56	0.72	3	0	1	0	1	0	5	10	6	1	5	6
BnaA01g19500D	17.34	5.68	12.9	3.16	443.83	156.86	365.49	96.67	16.25	17.83	17.95	6.64	3.55	6.85	19.76	10.16	8.77	2.58	1.27	5.63	449	426	456.48	158.27	104	208.31	555.48	270	271	88	39	163
BnaA01g19510D	0	0	0	0	0	0	0	0	0	0	0	0	0	0	0	0	0	0	0	0	0	0	0	0	0	0	0	0	0	0	0	0
BnaA01g19520D	0	0	0	0	0	0	0	0	0	0	0	0	0	0	0	0	0	0	0	0	0	0	0	0	0	0	0	0	0	0	0	0
BnaA01g19530D	0	0.05	0	0	0	0.33	0	0	0	0	0	0	0.14	0	0	0	0	0	0	0	0	0	0	0	1	0	0	0	0	0	0	0
BnaA01g19540D	6.84	4.98	6.22	3.82	172.86	139.27	175.66	118.9	6.34	7.12	7.06	3.9	5.26	5.77	6.78	5.57	6.3	4.52	3.14	3.81	173.03	168.07	177.49	91.96	152.4	173.45	188.27	146.24	192.46	152.2	95.39	109.12
BnaA01g19550D	0.11	0.07	0.04	0.06	1.67	1	0.67	1	0.06	0	0.27	0.14	0.06	0	0.12	0	0	0.05	0.06	0.06	1	0	4	2	1	0	2	0	0	1	1	1
BnaA01g19560D	0	0	0	0	0	0	0	0	0	0	0	0	0	0	0	0	0	0	0	0	0	0	0	0	0	0	0	0	0	0	0	0
BnaA01g19570D	0	0	0	0	0	0	0	0	0	0	0	0	0	0	0	0	0	0	0	0	0	0	0	0	0	0	0	0	0	0	0	0
BnaA01g19580D	0	0	0	0	0	0	0	0	0	0	0	0	0	0	0	0	0	0	0	0	0	0	0	0	0	0	0	0	0	0	0	0
BnaA01g19590D	0.02	0.02	0.11	0.25	0.33	0.33	2	5	0.05	0	0	0	0	0.05	0	0.17	0.15	0.04	0.15	0.57	1	0	0	0	0	1	0	3	3	1	3	11
BnaA01g19600D	0	0	0	0	0	0	0	0	0	0	0	0	0	0	0	0	0	0	0	0	0	0	0	0	0	0	0	0	0	0	0	0
BnaA01g19610D	0	0	0	0	0	0	0	0	0	0	0	0	0	0	0	0	0	0	0	0	0	0	0	0	0	0	0	0	0	0	0	0
BnaA01g19620D	0.01	0	0	0	0.67	0	0	0	0	0.04	0	0	0	0	0	0	0	0	0	0	0	2	0	0	0	0	0	0	0	0	0	0
BnaA01g19630D	0	0	0.02	0	0	0	0.33	0	0	0	0	0	0	0	0	0	0.06	0	0	0	0	0	0	0	0	0	0	0	1	0	0	0
BnaA01g19640D	1.99	1.25	0.53	0.09	34.87	23.27	10.33	2	1.91	1.65	2.41	1.6	0.61	1.53	0.63	0.44	0.52	0.04	0.14	0.1	36.02	26.87	41.72	26	12.16	31.64	12	8	11	1	3	2
BnaA01g19650D	1.22	2.58	2.88	2.14	22.95	51.99	59.16	48.03	1.25	0.89	1.52	2.95	1.38	3.4	4.1	2.76	1.79	1.73	1.95	2.73	25.24	15.54	28.06	51.11	29.5	75.37	83.96	53.33	40.2	42.84	43.65	57.61
BnaA01g19660D	0	0	0	0	0	0	0	0	0	0	0	0	0	0	0	0	0	0	0	0	0	0	0	0	0	0	0	0	0	0	0	0
BnaA01g19670D	0.03	0	0.05	0	0.33	0	0.67	0	0.08	0	0	0	0	0	0.16	0	0	0	0	0	1	0	0	0	0	0	2	0	0	0	0	0
BnaA01g19680D	0.21	0.14	0.36	0	2.33	1.67	4.33	0	0.17	0.1	0.36	0.19	0.08	0.15	0.33	0.52	0.22	0	0	0	2	1	4	2	1	2	4	6	3	0	0	0
BnaA01g19690D	0	0	0	0	0	0	0	0	0	0	0	0	0	0	0	0	0	0	0	0	0	0	0	0	0	0	0	0	0	0	0	0
BnaA01g19700D	2.67	1.94	3.78	3.72	43.16	34.4	67.2	73.03	2.89	2.71	2.4	1.5	2.64	1.67	4.01	4.36	2.97	3.7	3.36	4.11	50.26	40.79	38.44	22.45	48.75	32	71	72.91	57.7	79.29	64.94	74.85
BnaA01g19710D	15.02	28.37	11.87	20.85	281.54	581.41	249.39	475.59	15.96	15.05	14.05	24.36	33.99	26.76	7.62	12.33	15.66	22.1	18.12	22.34	321.74	262.35	260.52	423.42	727.16	593.66	156.24	239.06	352.87	549.11	405.96	471.7
BnaA01g19720D	0.01	0	0.05	0.02	0.11	0	1.22	0.56	0	0	0.02	0	0	0	0.01	0.06	0.08	0.02	0.01	0.03	0	0	0.33	0	0	0	0.33	1.33	2	0.67	0.33	0.67
BnaA01g19730D	0	0	0	0	0	0	0	0	0	0	0	0	0	0	0	0	0	0	0	0	0	0	0	0	0	0	0	0	0	0	0	0
BnaA01g19740D	0.3	0.06	0.12	0.14	3	0.67	1.33	1.67	0.18	0.53	0.2	0	0.17	0	0.18	0.19	0	0	0.33	0.09	2	5	2	0	2	0	2	2	0	0	4	1
BnaA01g19750D	343.27	70.22	300.5	58.46	7217.64	1612.49	7013.59	1477.63	360.65	303.04	366.13	63.17	61.61	85.89	334.45	266.91	300.14	43.04	74.43	57.92	8137.34	5913.59	7601.98	1229.22	1475.16	2133.1	7677.9	5792.98	7569.9	1197.39	1866.64	1368.85
BnaA01g19760D	0	0	0	0	0	0	0	0	0	0	0	0	0	0	0	0	0	0	0	0	0	0	0	0	0	0	0	0	0	0	0	0
BnaA01g19770D	0	0	0	0	0	0	0	0	0	0	0	0	0	0	0	0	0	0	0	0	0	0	0	0	0	0	0	0	0	0	0	0
BnaA01g19780D	0	0	0	0	0	0	0	0	0	0	0	0	0	0	0	0	0	0	0	0	0	0	0	0	0	0	0	0	0	0	0	0
BnaA01g19790D	11.32	3.46	11.23	4.48	671.75	227.25	736.42	321.46	11.28	9.9	12.78	2.61	2.56	5.2	11.83	11.69	10.17	3.57	5.85	4.03	719.4	545.7	750.16	143.28	173.19	365.28	767.32	716.99	724.94	280.54	414.74	269.09
BnaA01g19800D	0	0	0	0	0	0	0	0	0	0	0	0	0	0	0	0	0	0	0	0	0	0	0	0	0	0	0	0	0	0	0	0
BnaA01g19810D	3.15	14.78	3.5	18.2	151.92	762.88	186.69	1071.64	3.29	3.07	3.09	17.17	14.5	12.68	3.37	3.84	3.3	19.73	18.24	16.63	170.64	137.64	147.48	767.61	797.57	723.45	177.65	191.41	191.01	1260.75	1051.04	903.13
BnaA01g19820D	0	0	0	0	0	0	0	0	0	0	0	0	0	0	0	0	0	0	0	0	0	0	0	0	0	0	0	0	0	0	0	0
BnaA01g19830D	0.04	0.01	0.06	0.01	1.67	0.33	2.67	0.33	0.02	0.05	0.05	0	0	0.02	0.02	0.14	0.02	0	0	0.02	1	2	2	0	0	1	1	6	1	0	0	1
BnaA01g19840D	0	0	0	0	0	0	0	0	0	0	0	0	0	0	0	0	0	0	0	0	0	0	0	0	0	0	0	0	0	0	0	0
BnaA01g19850D	0.02	0.02	0	0.06	0.33	0.33	0	1.67	0	0	0.05	0.05	0	0	0	0	0	0.17	0	0	0	0	1	1	0	0	0	0	0	5	0	0
BnaA01g19860D	7.42	4.33	8.97	3.9	89.52	56.62	121.28	57.22	7.78	9.01	5.48	4.51	4.72	3.77	8.59	8.14	10.17	3.09	5.46	3.15	101.36	101.53	65.67	50.64	65.22	54	113.85	102	148	49.67	79	43
BnaA01g19870D	67.97	28.33	63.35	42.62	2135.85	969.39	2226.83	1637.71	66.2	71.76	65.94	28.58	25.35	31.07	22.59	84.58	82.88	43.79	44.13	39.95	2245.05	2104.61	2057.9	835.82	912.41	1159.95	779.63	2759.08	3141.77	1830.81	1663.33	1418.99
BnaA01g19880D	14.47	9.99	12.09	4.46	279.33	208.67	259.33	105	15.35	12.89	15.16	9.96	10.05	9.95	10.01	12.84	13.43	5.01	3.91	4.47	318	231	289	178	221	227	211	256	311	128	90	97
BnaA01g19890D	0.96	1.9	2.36	0.33	20	43.8	53.48	7.98	1.23	0.71	0.95	0.89	2.49	2.31	2.59	2.46	2.03	0.2	0.3	0.48	27.13	13.59	19.27	16.97	58.24	56.19	58.12	52.19	50.14	5.54	7.38	11.01
BnaA01g19900D	0	0	0	0	0	0	0	0	0	0	0	0	0	0	0	0	0	0	0	0	0	0	0	0	0	0	0	0	0	0	0	0
BnaA01g19910D	0	0	0	0	0	0	0	0	0	0	0	0	0	0	0	0	0	0	0	0	0	0	0	0	0	0	0	0	0	0	0	0
BnaA01g19920D	0.17	0.08	0.09	0	3	1.33	1.83	0	0.26	0.24	0	0.18	0.05	0	0.03	0	0.24	0	0	0	5	4	0	3	1	0	0.5	0	5	0	0	0
BnaA01g19930D	0	0	0	0	0	0	0	0	0	0	0	0	0	0	0	0	0	0	0	0	0	0	0	0	0	0	0	0	0	0	0	0
BnaA01g19940D	0.07	0.11	0.05	0.03	1.33	2.67	1.33	0.67	0	0.15	0.05	0.1	0.12	0.12	0.08	0.04	0.04	0.04	0	0.04	0	3	1	2	3	3	2	1	1	1	0	1
BnaA01g19950D	0.07	0.02	0.06	0	1	0.33	1	0	0	0.14	0.07	0.07	0	0	0	0	0.17	0	0	0	0	2	1	1	0	0	0	0	3	0	0	0
BnaA01g19960D	0.06	0.09	0	0.09	1	1.67	0	2	0.05	0.06	0.06	0.12	0.1	0.05	0	0	0	0.08	0.05	0.15	1	1	1	2	2	1	0	0	0	2	1	3
BnaA01g19970D	4.49	1.57	4.82	1.91	147.8	57.22	172.96	74.38	5.12	2.95	5.4	0.85	1.94	1.91	6.75	4.41	3.29	0.98	2.45	2.31	179.51	89.46	174.43	25.59	72.28	73.8	241.09	148.78	129.02	42.59	95.6	84.94
BnaA01g19980D	0.33	0.13	0.39	0.31	1.67	0.67	2.33	2	0.18	0.62	0.19	0.21	0.17	0	0.18	0.19	0.8	0.58	0	0.34	1	3	1	1	1	0	1	1	5	4	0	2
[truncated: 102,746 more rows]
