# Supplementary material for: Characterization of cold stress responses in different rapeseed ecotypes based on metabolomics and transcriptomics analyses
Source: PeerJ. 2020 Mar 31;8:e8704. doi: 10.7717/peerj.8704 (PMC7120054; doi:10.7717/peerj.8704)
Supplement: Supplemental Information 6 [file peerj-08-8704-s006.xlsx]

## Sheet: S4
Table S4 Differentially expressed genes identified in the two B. napus ecotypes after cold stress.
Gene ID	28W_count	4W_count	28W_fpkm	4W_fpkm	28S_count	4S_count	28S_fpkm	4S_fpkm	28W-vs-4W_log2(FC)	28W-vs-4W_FDR	28S-vs-4S_log2(FC)	28S-vs-4S_FDR	Description	KEGG_A_class	KEGG_B_class	Pathway	K_ID	GO Component	GO Function	GO Process
BnaA01g00020D	15.6667	8	1.08	0.496667	26	2	2.02333	0.136667	-1.12068	0.0895243	-3.888	6.39649e-07	BnaA01g00020D [Brassica napus]	-	-	-	-	GO:0009536//plastid;GO:0043229//intracellular organelle;GO:0044424//intracellular part;GO:0005622//intracellular;GO:0043227//membrane-bounded organelle;GO:0005737//cytoplasm;GO:0005623//cell;GO:0044464//cell part;GO:0044444//cytoplasmic part;GO:0043226//organelle;GO:0043231//intracellular membrane-bounded organelle	-	-
BnaA01g00030D	327.24	143.873	8.62333	3.48	239.087	146.18	6.95	3.91333	-1.30916	6.66e-07	-0.828615	0.00522933	BnaA01g00030D [Brassica napus]	-	-	-	-	-	-	GO:0050794//regulation of cellular process;GO:0048585//negative regulation of response to stimulus;GO:0009966//regulation of signal transduction;GO:0045744//negative regulation of G-protein coupled receptor protein signaling pathway;GO:0010646//regulation of cell communication;GO:0065007//biological regulation;GO:0009968//negative regulation of signal transduction;GO:0023021//termination of signa…
BnaA01g00050D	1943.4	702.547	79.5267	25.9033	819.19	1284.56	36.7967	52.7033	-1.6183	2.95e-10	0.518319	0.0814927	PREDICTED: homeobox-leucine zipper protein ATHB-16-like isoform X2 [Brassica rapa]	-	-	-	-	GO:0044464//cell part;GO:0043229//intracellular organelle;GO:0043227//membrane-bounded organelle;GO:0043231//intracellular membrane-bounded organelle;GO:0044424//intracellular part;GO:0005623//cell;GO:0005634//nucleus;GO:0043226//organelle;GO:0005622//intracellular	GO:0097159//organic cyclic compound binding;GO:0001067//regulatory region nucleic acid binding;GO:0003677//DNA binding;GO:0044212//transcription regulatory region DNA binding;GO:0003676//nucleic acid binding;GO:0001071//nucleic acid binding transcription factor activity;GO:0003690//double-stranded DNA binding;GO:1901363//heterocyclic compound binding;GO:0000976//transcription regulatory region se…	GO:0050896//response to stimulus;GO:0009987//cellular process;GO:0043170//macromolecule metabolic process;GO:0034645//cellular macromolecule biosynthetic process;GO:0050793//regulation of developmental process;GO:0018130//heterocycle biosynthetic process;GO:0044271//cellular nitrogen compound biosynthetic process;GO:0006725//cellular aromatic compound metabolic process;GO:0040034//regulation of d…
BnaA01g00060D	51.3333	50.6267	2.63	2.37	77.7367	26.3333	4.47667	1.38	-0.150176	0.776003	-1.69776	6.71364e-05	BnaC01g00970D [Brassica napus]	-	-	-	-	-	GO:0005488//binding;GO:0043167//ion binding;GO:0043168//anion binding;GO:0005543//phospholipid binding;GO:0008289//lipid binding	GO:0051179//localization;GO:0044699//single-organism process;GO:0050896//response to stimulus;GO:0051234//establishment of localization;GO:0044765//single-organism transport;GO:0006820//anion transport;GO:0015698//inorganic anion transport;GO:0042221//response to chemical;GO:0006810//transport;GO:0001101//response to acid chemical;GO:0006811//ion transport;GO:1902578//single-organism localization
BnaA01g00080D	43	17.3333	4.05333	1.44667	20.6667	10.3333	2.12	1.06667	-1.48638	0.00181697	-0.990955	0.241958	BnaA01g00080D [Brassica napus]	-	-	-	-	-	-	-
BnaA01g00100D	219.597	122.813	9.19	4.67667	147.303	43	6.81667	1.88333	-0.974584	7.39e-05	-1.85578	0.000564293	PREDICTED: probable glycosyltransferase At5g03795 [Brassica rapa]	-	-	-	-	GO:0005623//cell;GO:0016020//membrane;GO:0044424//intracellular part;GO:0044464//cell part;GO:0043226//organelle;GO:0005622//intracellular;GO:0043229//intracellular organelle;GO:0043227//membrane-bounded organelle;GO:0043231//intracellular membrane-bounded organelle	-	-
BnaA01g00120D	85.4967	19.0067	4.79667	0.986667	38.7	8.66667	2.41	0.52	-2.2814	1.42e-08	-2.21245	0.00141932	PREDICTED: uncharacterized tRNA/rRNA methyltransferase YsgA-like [Brassica napus]	-	-	-	-	-	GO:0016740//transferase activity;GO:0003723//RNA binding;GO:0016741//transferase activity, transferring one-carbon groups;GO:0003676//nucleic acid binding;GO:0097159//organic cyclic compound binding;GO:0008173//RNA methyltransferase activity;GO:1901363//heterocyclic compound binding;GO:0003824//catalytic activity;GO:0005488//binding;GO:0008168//methyltransferase activity	GO:0090304//nucleic acid metabolic process;GO:0043170//macromolecule metabolic process;GO:0044238//primary metabolic process;GO:0009987//cellular process;GO:0006807//nitrogen compound metabolic process;GO:0016070//RNA metabolic process;GO:0034641//cellular nitrogen compound metabolic process;GO:0071704//organic substance metabolic process;GO:0044260//cellular macromolecule metabolic process;GO:00…
BnaA01g00130D	23.6667	5.33333	1.86333	0.373333	14.2633	3	1.25667	0.26	-2.31935	9.19e-05	-2.27302	0.00885506	PREDICTED: dof zinc finger protein DOF4.7-like [Brassica napus]	-	-	-	-	-	GO:0003677//DNA binding;GO:1901363//heterocyclic compound binding;GO:0008270//zinc ion binding;GO:0043167//ion binding;GO:0043169//cation binding;GO:0046872//metal ion binding;GO:0046914//transition metal ion binding;GO:0097159//organic cyclic compound binding;GO:0003676//nucleic acid binding;GO:0005488//binding	-
BnaA01g00140D	143.19	57.7767	6.72	2.52333	405.67	29	21.4967	1.46	-1.41313	1.07e-05	-3.88007	2.15925e-15	PREDICTED: cinnamyl alcohol dehydrogenase 7-like isoform X2 [Brassica napus]	Metabolism	Global and Overview;Biosynthesis of other secondary metabolites	ko01100//Metabolic pathways;ko01110//Biosynthesis of secondary metabolites;ko00940//Phenylpropanoid biosynthesis	K00083	-	GO:0043167//ion binding;GO:0097159//organic cyclic compound binding;GO:1901265//nucleoside phosphate binding;GO:0016614//oxidoreductase activity, acting on CH-OH group of donors;GO:0043169//cation binding;GO:0000166//nucleotide binding;GO:0016491//oxidoreductase activity;GO:0046872//metal ion binding;GO:0036094//small molecule binding;GO:0008270//zinc ion binding;GO:0003824//catalytic activity;GO…	GO:0009058//biosynthetic process;GO:0009605//response to external stimulus;GO:0033554//cellular response to stress;GO:0044711//single-organism biosynthetic process;GO:0044237//cellular metabolic process;GO:0044550//secondary metabolite biosynthetic process;GO:1901576//organic substance biosynthetic process;GO:0043207//response to external biotic stimulus;GO:0044249//cellular biosynthetic process;…
BnaA01g00150D	3.26	0	0.173333	0.001	7.33333	0.333333	0.416667	0.02	-7.43741	0.0227141	-4.38082	0.00185144	PREDICTED: probable cinnamyl alcohol dehydrogenase 6 [Brassica rapa]	Metabolism	Global and Overview;Biosynthesis of other secondary metabolites	ko01100//Metabolic pathways;ko01110//Biosynthesis of secondary metabolites;ko00940//Phenylpropanoid biosynthesis	K00083	-	GO:0016491//oxidoreductase activity;GO:0005488//binding;GO:0043167//ion binding;GO:0036094//small molecule binding;GO:0097159//organic cyclic compound binding;GO:0046914//transition metal ion binding;GO:0043169//cation binding;GO:0000166//nucleotide binding;GO:0008270//zinc ion binding;GO:0003824//catalytic activity;GO:0046872//metal ion binding;GO:1901363//heterocyclic compound binding;GO:190126…	GO:0019438//aromatic compound biosynthetic process;GO:0009699//phenylpropanoid biosynthetic process;GO:0044237//cellular metabolic process;GO:0009058//biosynthetic process;GO:1901360//organic cyclic compound metabolic process;GO:0044711//single-organism biosynthetic process;GO:1901576//organic substance biosynthetic process;GO:0006725//cellular aromatic compound metabolic process;GO:0071704//orga…
BnaA01g00180D	201.373	81.6233	8.81667	3.30667	184.187	45.7767	8.98333	2.08	-1.41486	1.39e-07	-2.11067	1.0156e-08	BnaA01g00180D [Brassica napus]	-	-	-	-	-	-	-
BnaA01g00190D	320.043	862.853	8.91667	21.7933	300.407	330.46	9.24	9.72333	1.28931	2.13e-08	0.0735581	0.937477	BnaA01g00190D [Brassica napus]	Genetic Information Processing	Folding, sorting and degradation	ko03018//RNA degradation	K04043	-	GO:0032553//ribonucleotide binding;GO:0032555//purine ribonucleotide binding;GO:0043168//anion binding;GO:0035639//purine ribonucleoside triphosphate binding;GO:1901363//heterocyclic compound binding;GO:0017076//purine nucleotide binding;GO:0097367//carbohydrate derivative binding;GO:1901265//nucleoside phosphate binding;GO:0001882//nucleoside binding;GO:0001883//purine nucleoside binding;GO:0005…	GO:0009987//cellular process;GO:0006457//protein folding
BnaA01g00200D	557.063	530	22.0833	19.04	415.477	209.393	18.2733	8.80333	-0.213924	0.435516	-1.05362	0.0115206	PREDICTED: protein RMD5 homolog A-like [Brassica napus]	-	-	-	-	-	GO:0043169//cation binding;GO:0046914//transition metal ion binding;GO:0005488//binding;GO:0046872//metal ion binding;GO:0043167//ion binding;GO:0005515//protein binding;GO:0008270//zinc ion binding	-
BnaA01g00210D	3060.14	1919.53	71.6267	40.9267	2476.43	1055.67	64.5967	26.5	-0.807456	0.000353518	-1.28547	0.00125462	PREDICTED: phosphoenolpyruvate carboxykinase [ATP] [Brassica napus]	Metabolism	Carbohydrate metabolism;Energy metabolism;Global and Overview	ko01100//Metabolic pathways;ko01110//Biosynthesis of secondary metabolites;ko01130//Biosynthesis of antibiotics;ko01120//Microbial metabolism in diverse environments;ko01200//Carbon metabolism;ko00010//Glycolysis / Gluconeogenesis;ko00620//Pyruvate metabolism;ko00710//Carbon fixation in photosynthetic organisms;ko00020//Citrate cycle (TCA cycle)	K01610	GO:0044424//intracellular part;GO:0031974//membrane-enclosed lumen;GO:0005737//cytoplasm;GO:0044464//cell part;GO:0044422//organelle part;GO:0043227//membrane-bounded organelle;GO:0005634//nucleus;GO:0043231//intracellular membrane-bounded organelle;GO:0043229//intracellular organelle;GO:0044446//intracellular organelle part;GO:0031981//nuclear lumen;GO:0043226//organelle;GO:0005622//intracellula…	GO:0097159//organic cyclic compound binding;GO:0005488//binding;GO:0043168//anion binding;GO:1901265//nucleoside phosphate binding;GO:0016830//carbon-carbon lyase activity;GO:0032550//purine ribonucleoside binding;GO:0043167//ion binding;GO:0001883//purine nucleoside binding;GO:0016829//lyase activity;GO:1901363//heterocyclic compound binding;GO:0097367//carbohydrate derivative binding;GO:0032559…	GO:0010038//response to metal ion;GO:0031669//cellular response to nutrient levels;GO:0051716//cellular response to stimulus;GO:0044711//single-organism biosynthetic process;GO:0009607//response to biotic stimulus;GO:0009605//response to external stimulus;GO:0009058//biosynthetic process;GO:0051704//multi-organism process;GO:0071496//cellular response to external stimulus;GO:0046364//monosacchari…
BnaA01g00270D	39.8867	25.2133	1.48333	0.836667	57.1033	6.60667	2.39	0.256667	-0.826118	0.0916285	-3.21904	1.08814e-05	BnaA01g00270D [Brassica napus]	Metabolism	Amino acid metabolism;Global and Overview	ko01100//Metabolic pathways;ko01110//Biosynthesis of secondary metabolites;ko00270//Cysteine and methionine metabolism	K01762	-	GO:0030170//pyridoxal phosphate binding;GO:0005488//binding;GO:0003824//catalytic activity;GO:0097159//organic cyclic compound binding;GO:0005515//protein binding;GO:1901363//heterocyclic compound binding;GO:0043168//anion binding;GO:0043167//ion binding;GO:0048037//cofactor binding	GO:0008152//metabolic process;GO:0009058//biosynthetic process
BnaA01g00290D	52.58	3.52	1.51333	0.09	41.7	3.03667	1.31667	0.0866667	-4.07166	3.34e-12	-3.92527	2.14095e-09	PREDICTED: AP2-like ethylene-responsive transcription factor ANT [Brassica napus]	-	-	-	-	-	GO:0005488//binding;GO:0003676//nucleic acid binding;GO:0003700//transcription factor activity, sequence-specific DNA binding;GO:0001071//nucleic acid binding transcription factor activity;GO:0003677//DNA binding;GO:0097159//organic cyclic compound binding;GO:1901363//heterocyclic compound binding	-
BnaA01g00310D	26.1633	66.6633	1.97333	4.66333	27.3333	15.3333	2.31667	1.22	1.24073	0.00125431	-0.925169	0.171557	PREDICTED: light-inducible protein CPRF2-like [Brassica napus]	-	-	-	-	GO:0044464//cell part;GO:0005622//intracellular;GO:0043231//intracellular membrane-bounded organelle;GO:0043227//membrane-bounded organelle;GO:0005623//cell;GO:0044424//intracellular part;GO:0043229//intracellular organelle;GO:0043226//organelle	GO:0001071//nucleic acid binding transcription factor activity;GO:0043565//sequence-specific DNA binding;GO:0005488//binding;GO:1901363//heterocyclic compound binding;GO:0003677//DNA binding;GO:0097159//organic cyclic compound binding;GO:0003676//nucleic acid binding;GO:0003700//transcription factor activity, sequence-specific DNA binding	GO:1901576//organic substance biosynthetic process;GO:0006725//cellular aromatic compound metabolic process;GO:0006807//nitrogen compound metabolic process;GO:1901362//organic cyclic compound biosynthetic process;GO:0090304//nucleic acid metabolic process;GO:0016070//RNA metabolic process;GO:0006351//transcription, DNA-templated;GO:0032774//RNA biosynthetic process;GO:0009059//macromolecule biosy…
BnaA01g00320D	102.253	1364.54	3.45	41.99	32.78	447.13	1.22333	15.78	3.60538	2.94e-44	3.68921	2.69522e-18	PREDICTED: heptahelical transmembrane protein 4 isoform X1 [Brassica rapa]	-	-	-	-	GO:0016021//integral component of membrane;GO:0031224//intrinsic component of membrane;GO:0016020//membrane;GO:0044425//membrane part	-	GO:0050896//response to stimulus;GO:0034285//response to disaccharide;GO:0042221//response to chemical;GO:0009743//response to carbohydrate;GO:1901700//response to oxygen-containing compound;GO:0010033//response to organic substance;GO:0009719//response to endogenous stimulus
BnaA01g00340D	37.1133	28.68	1.06333	0.74	88.19	12.3333	2.80333	0.386667	-0.522997	0.300437	-2.85798	4.36179e-09	PREDICTED: probable amino-acid acetyltransferase NAGS2, chloroplastic [Brassica rapa]	Metabolism	Amino acid metabolism;Global and Overview	ko01100//Metabolic pathways;ko01110//Biosynthesis of secondary metabolites;ko01130//Biosynthesis of antibiotics;ko01230//Biosynthesis of amino acids;ko01210//2-Oxocarboxylic acid metabolism;ko00220//Arginine biosynthesis	K14682	GO:0044464//cell part;GO:0044424//intracellular part;GO:0005737//cytoplasm;GO:0005622//intracellular;GO:0005623//cell	GO:0016407//acetyltransferase activity;GO:0016746//transferase activity, transferring acyl groups;GO:0004042//acetyl-CoA:L-glutamate N-acetyltransferase activity;GO:0016410//N-acyltransferase activity;GO:0016740//transferase activity;GO:0003824//catalytic activity;GO:0016747//transferase activity, transferring acyl groups other than amino-acyl groups;GO:0008080//N-acetyltransferase activity	GO:0044283//small molecule biosynthetic process;GO:0044281//small molecule metabolic process;GO:1901566//organonitrogen compound biosynthetic process;GO:0019752//carboxylic acid metabolic process;GO:0009058//biosynthetic process;GO:0046394//carboxylic acid biosynthetic process;GO:1901564//organonitrogen compound metabolic process;GO:0006526//arginine biosynthetic process;GO:0008652//cellular amin…
BnaA01g00360D	1.66667	2.66667	0.0766667	0.11	4.48333	0	0.213333	0.001	0.520832	0.985037	-7.73697	0.00811751	PREDICTED: BTB/POZ and TAZ domain-containing protein 5-like [Brassica napus]	-	-	-	-	GO:0043226//organelle;GO:0043227//membrane-bounded organelle;GO:0044424//intracellular part;GO:0043231//intracellular membrane-bounded organelle;GO:0005623//cell;GO:0043229//intracellular organelle;GO:0005634//nucleus;GO:0044464//cell part;GO:0005622//intracellular	GO:0061733//peptide-lysine-N-acetyltransferase activity;GO:0005488//binding;GO:0000988//transcription factor activity, protein binding;GO:0046872//metal ion binding;GO:0003824//catalytic activity;GO:0043167//ion binding;GO:0008080//N-acetyltransferase activity;GO:0004402//histone acetyltransferase activity;GO:0043169//cation binding;GO:0016747//transferase activity, transferring acyl groups other…	GO:0046483//heterocycle metabolic process;GO:0044260//cellular macromolecule metabolic process;GO:1901362//organic cyclic compound biosynthetic process;GO:0018130//heterocycle biosynthetic process;GO:0007389//pattern specification process;GO:0010033//response to organic substance;GO:0003002//regionalization;GO:0006139//nucleobase-containing compound metabolic process;GO:0034645//cellular macromol…
BnaA01g00370D	21.6667	0	1.05333	0.001	10.1567	0	0.556667	0.001	-10.0407	1.83e-11	-9.12067	4.18397e-05	BnaA01g00370D [Brassica napus]	-	-	-	-	-	GO:0003824//catalytic activity;GO:0016410//N-acyltransferase activity;GO:0008080//N-acetyltransferase activity;GO:0016746//transferase activity, transferring acyl groups;GO:0016747//transferase activity, transferring acyl groups other than amino-acyl groups;GO:0016740//transferase activity;GO:0016407//acetyltransferase activity	GO:0070887//cellular response to chemical stimulus;GO:0032870//cellular response to hormone stimulus;GO:0051716//cellular response to stimulus;GO:0044767//single-organism developmental process;GO:0050896//response to stimulus;GO:0044763//single-organism cellular process;GO:0009653//anatomical structure morphogenesis;GO:0009725//response to hormone;GO:0009639//response to red or far red light;GO:0…
BnaA01g00380D	585	185.333	12.8433	3.70667	618.483	84.1667	15.0833	1.91667	-1.79283	7.06e-14	-2.97628	9.9489e-11	PREDICTED: formamidase-like [Brassica napus]	Metabolism	Carbohydrate metabolism;Energy metabolism;Global and Overview;Metabolism of other amino acids	ko01200//Carbon metabolism;ko00630//Glyoxylate and dicarboxylate metabolism;ko00460//Cyanoamino acid metabolism;ko00910//Nitrogen metabolism	K01455	GO:0044464//cell part;GO:0043229//intracellular organelle;GO:0043226//organelle;GO:0043227//membrane-bounded organelle;GO:0044424//intracellular part;GO:0043231//intracellular membrane-bounded organelle;GO:0005623//cell;GO:0005622//intracellular	-	GO:0006955//immune response;GO:0002376//immune system process;GO:0006952//defense response;GO:0051704//multi-organism process;GO:0006950//response to stress;GO:0050896//response to stimulus;GO:0009605//response to external stimulus;GO:0043207//response to external biotic stimulus;GO:0008152//metabolic process;GO:0009814//defense response, incompatible interaction;GO:0051707//response to other org…
BnaA01g00390D	1498.31	441.09	49.4833	13.4167	1622.2	386.667	60.05	13.4733	-1.88292	1.1e-15	-2.15606	4.75412e-09	PREDICTED: formamidase-like [Brassica napus]	Metabolism	Carbohydrate metabolism;Metabolism of other amino acids;Energy metabolism;Global and Overview	ko01200//Carbon metabolism;ko00630//Glyoxylate and dicarboxylate metabolism;ko00460//Cyanoamino acid metabolism;ko00910//Nitrogen metabolism	K01455	GO:0044464//cell part;GO:0043229//intracellular organelle;GO:0005622//intracellular;GO:0043226//organelle;GO:0044424//intracellular part;GO:0043231//intracellular membrane-bounded organelle;GO:0005623//cell;GO:0043227//membrane-bounded organelle	-	GO:0009814//defense response, incompatible interaction;GO:0006955//immune response;GO:0009605//response to external stimulus;GO:0098542//defense response to other organism;GO:0006950//response to stress;GO:0050896//response to stimulus;GO:0008152//metabolic process;GO:0051707//response to other organism;GO:0009607//response to biotic stimulus;GO:0043207//response to external biotic stimulus;GO:00…
BnaA01g00400D	10.3333	0.333333	0.576667	0.0166667	0.333333	0.333333	0.0166667	0.02	-5.1127	0.0439367	0.263034	1	PREDICTED: LOB domain-containing protein 39 [Brassica rapa]	-	-	-	-	-	-	GO:0006694//steroid biosynthetic process;GO:0009058//biosynthetic process;GO:0006629//lipid metabolic process;GO:1901360//organic cyclic compound metabolic process;GO:1901576//organic substance biosynthetic process;GO:0008152//metabolic process;GO:0044238//primary metabolic process;GO:0071704//organic substance metabolic process;GO:1901362//organic cyclic compound biosynthetic process;GO:0044711/…
BnaA01g00410D	50.6667	3.33333	2.19333	0.13	59.6667	0.666667	2.78333	0.03	-4.07654	3.25e-11	-6.53571	6.71405e-13	PREDICTED: peroxidase 50 [Brassica rapa]	Metabolism	Global and Overview;Biosynthesis of other secondary metabolites	ko01100//Metabolic pathways;ko01110//Biosynthesis of secondary metabolites;ko00940//Phenylpropanoid biosynthesis	K00430	GO:0005623//cell;GO:0005622//intracellular;GO:0044464//cell part;GO:0044424//intracellular part	GO:1901363//heterocyclic compound binding;GO:0016684//oxidoreductase activity, acting on peroxide as acceptor;GO:0016491//oxidoreductase activity;GO:0097159//organic cyclic compound binding;GO:0020037//heme binding;GO:0016209//antioxidant activity;GO:0004601//peroxidase activity;GO:0003824//catalytic activity;GO:0046906//tetrapyrrole binding;GO:0005488//binding	GO:0008152//metabolic process;GO:0044699//single-organism process;GO:0055114//oxidation-reduction process;GO:0006979//response to oxidative stress;GO:0050896//response to stimulus;GO:0044710//single-organism metabolic process;GO:0006950//response to stress
BnaA01g00420D	365.057	155.003	12.4567	4.85333	325.677	118.333	12.26	4.07333	-1.35987	3.7e-07	-1.58968	5.55002e-05	BnaA01g00420D [Brassica napus]	-	-	-	-	GO:0043227//membrane-bounded organelle;GO:0043231//intracellular membrane-bounded organelle;GO:0005622//intracellular;GO:0043226//organelle;GO:0009536//plastid;GO:0044464//cell part;GO:0005623//cell;GO:0005737//cytoplasm;GO:0044444//cytoplasmic part;GO:0043229//intracellular organelle;GO:0044424//intracellular part	GO:0016893//endonuclease activity, active with either ribo- or deoxyribonucleic acids and producing 5'-phosphomonoesters;GO:0004519//endonuclease activity;GO:0005488//binding;GO:0004525//ribonuclease III activity;GO:0003824//catalytic activity;GO:0004521//endoribonuclease activity;GO:1901363//heterocyclic compound binding;GO:0016891//endoribonuclease activity, producing 5'-phosphomonoesters;GO:00…	GO:0051172//negative regulation of nitrogen compound metabolic process;GO:0002252//immune effector process;GO:0009057//macromolecule catabolic process;GO:0070887//cellular response to chemical stimulus;GO:0035195//gene silencing by miRNA;GO:0044270//cellular nitrogen compound catabolic process;GO:0034249//negative regulation of cellular amide metabolic process;GO:1901360//organic cyclic compound …
BnaA01g00430D	6.44333	3.33333	0.273333	0.13	6.17333	1.57667	0.286667	0.0666667	-1.07215	0.253271	-2.10434	0.0483715	PREDICTED: cyclin-B1-1-like [Brassica napus]	-	-	-	-	GO:0043227//membrane-bounded organelle;GO:0043229//intracellular organelle;GO:0044424//intracellular part;GO:0005623//cell;GO:0044464//cell part;GO:0043231//intracellular membrane-bounded organelle;GO:0043226//organelle;GO:0005622//intracellular;GO:0005634//nucleus	GO:0019207//kinase regulator activity;GO:0005488//binding;GO:0005515//protein binding;GO:0019901//protein kinase binding;GO:0030234//enzyme regulator activity;GO:0019887//protein kinase regulator activity;GO:0019899//enzyme binding;GO:0019900//kinase binding;GO:0098772//molecular function regulator	GO:0048856//anatomical structure development;GO:0009314//response to radiation;GO:0050790//regulation of catalytic activity;GO:0007049//cell cycle;GO:0019220//regulation of phosphate metabolic process;GO:0090558//plant epidermis development;GO:0007127//meiosis I;GO:0090304//nucleic acid metabolic process;GO:0016049//cell growth;GO:0016571//histone methylation;GO:0036211//protein modification proc…
BnaA01g00450D	47.3333	12.3333	3.40667	0.81	21.6667	8	1.67667	0.573333	-2.07237	5.3e-05	-1.54815	0.0178009	BnaA01g00450D [Brassica napus]	-	-	-	-	-	-	-
BnaA01g00480D	38.7033	39.64	2.11667	1.92333	26.6433	3.75667	1.63	0.216667	-0.138185	0.945166	-2.91132	4.6471e-05	BnaA01g00480D [Brassica napus]	-	-	-	-	-	-	-
BnaA01g00500D	32.1167	7.66667	1.29	0.286667	22.5567	5	1.02333	0.213333	-2.16993	1.48e-05	-2.26209	0.00582855	BnaA01g00500D [Brassica napus]	-	-	-	-	-	-	-
BnaA01g00510D	6.51667	8.80333	0.26	0.306667	0.706667	36.37	0.0333333	1.56	0.23816	0.869358	5.54844	2.96089e-08	BnaA01g00510D [Brassica napus]	Metabolism	Metabolism of terpenoids and polyketides;Biosynthesis of other secondary metabolites;Global and Overview	ko01100//Metabolic pathways;ko01110//Biosynthesis of secondary metabolites;ko01120//Microbial metabolism in diverse environments;ko00945//Stilbenoid, diarylheptanoid and gingerol biosynthesis;ko00903//Limonene and pinene degradation	K00517	GO:0044424//intracellular part;GO:0005623//cell;GO:0043231//intracellular membrane-bounded organelle;GO:0005622//intracellular;GO:0044464//cell part;GO:0043226//organelle;GO:0043229//intracellular organelle;GO:0043227//membrane-bounded organelle	GO:0005488//binding;GO:0097159//organic cyclic compound binding;GO:0046914//transition metal ion binding;GO:1901363//heterocyclic compound binding;GO:0020037//heme binding;GO:0009055//electron carrier activity;GO:0043169//cation binding;GO:0003824//catalytic activity;GO:0046872//metal ion binding;GO:0005506//iron ion binding;GO:0016491//oxidoreductase activity;GO:0043167//ion binding;GO:0046906//…	GO:0019757//glycosinolate metabolic process;GO:0044237//cellular metabolic process;GO:0044281//small molecule metabolic process;GO:0006082//organic acid metabolic process;GO:0055114//oxidation-reduction process;GO:0071704//organic substance metabolic process;GO:0006790//sulfur compound metabolic process;GO:0043436//oxoacid metabolic process;GO:0008152//metabolic process;GO:1901657//glycosyl compo…
BnaA01g00520D	121.487	0.413333	4.55667	0.0133333	0	758.743	0.001	27.93	-8.4168	2.81e-14	14.7695	6.05417e-08	BnaA01g00520D [Brassica napus]	Metabolism	Metabolism of terpenoids and polyketides;Biosynthesis of other secondary metabolites;Global and Overview	ko01100//Metabolic pathways;ko01110//Biosynthesis of secondary metabolites;ko01120//Microbial metabolism in diverse environments;ko00945//Stilbenoid, diarylheptanoid and gingerol biosynthesis;ko00903//Limonene and pinene degradation	K00517	GO:0043227//membrane-bounded organelle;GO:0043226//organelle;GO:0044464//cell part;GO:0005622//intracellular;GO:0043231//intracellular membrane-bounded organelle;GO:0043229//intracellular organelle;GO:0044424//intracellular part;GO:0005623//cell	GO:0046872//metal ion binding;GO:0009055//electron carrier activity;GO:0097159//organic cyclic compound binding;GO:0043169//cation binding;GO:0046914//transition metal ion binding;GO:1901363//heterocyclic compound binding;GO:0005506//iron ion binding;GO:0046906//tetrapyrrole binding;GO:0043167//ion binding;GO:0005488//binding;GO:0003824//catalytic activity;GO:0020037//heme binding;GO:0016491//oxi…	GO:0009987//cellular process;GO:0006082//organic acid metabolic process;GO:0071704//organic substance metabolic process;GO:0044699//single-organism process;GO:0019748//secondary metabolic process;GO:0019757//glycosinolate metabolic process;GO:0043436//oxoacid metabolic process;GO:0006790//sulfur compound metabolic process;GO:0044281//small molecule metabolic process;GO:1901657//glycosyl compound …
BnaA01g00570D	46.5833	24.2233	1.89333	0.886667	30.6867	13.7267	1.38333	0.61	-1.09446	0.0117046	-1.18127	0.10974	BnaA01g00570D [Brassica napus]	Metabolism	Biosynthesis of other secondary metabolites;Metabolism of terpenoids and polyketides;Global and Overview	ko01100//Metabolic pathways;ko01110//Biosynthesis of secondary metabolites;ko01120//Microbial metabolism in diverse environments;ko00945//Stilbenoid, diarylheptanoid and gingerol biosynthesis;ko00903//Limonene and pinene degradation	K00517	-	GO:0043167//ion binding;GO:0020037//heme binding;GO:0046872//metal ion binding;GO:0046914//transition metal ion binding;GO:1901363//heterocyclic compound binding;GO:0046906//tetrapyrrole binding;GO:0097159//organic cyclic compound binding;GO:0005488//binding;GO:0009055//electron carrier activity;GO:0043169//cation binding;GO:0016491//oxidoreductase activity;GO:0005506//iron ion binding;GO:0003824…	GO:0016143//S-glycoside metabolic process;GO:0044710//single-organism metabolic process;GO:0008152//metabolic process;GO:0044237//cellular metabolic process;GO:0044699//single-organism process;GO:0044281//small molecule metabolic process;GO:0006082//organic acid metabolic process;GO:1901657//glycosyl compound metabolic process;GO:0044763//single-organism cellular process;GO:0055114//oxidation-red…
BnaA01g00580D	7.66667	8.66667	0.24	0.246667	15.18	0.666667	0.52	0.0233333	0.0395284	1	-4.47805	4.68225e-06	PREDICTED: indole-3-acetic acid-amido synthetase GH3.2 [Brassica rapa]	Environmental Information Processing	Signal transduction	ko04075//Plant hormone signal transduction	K14487	-	GO:0016879//ligase activity, forming carbon-nitrogen bonds;GO:0016874//ligase activity;GO:0003824//catalytic activity;GO:0016881//acid-amino acid ligase activity	GO:0009725//response to hormone;GO:0042221//response to chemical;GO:0009719//response to endogenous stimulus;GO:0065007//biological regulation;GO:0010033//response to organic substance;GO:0050896//response to stimulus;GO:0042592//homeostatic process;GO:0048878//chemical homeostasis;GO:0065008//regulation of biological quality
BnaA01g00590D	147	78.6667	6.39667	3.16333	295.667	89	14.4167	3.89667	-1.01587	0.000928407	-1.88743	3.57899e-09	BnaA01g00590D [Brassica napus]	Metabolism	Metabolism of terpenoids and polyketides;Biosynthesis of other secondary metabolites;Global and Overview	ko01100//Metabolic pathways;ko01110//Biosynthesis of secondary metabolites;ko01120//Microbial metabolism in diverse environments;ko00945//Stilbenoid, diarylheptanoid and gingerol biosynthesis;ko00903//Limonene and pinene degradation	K00517	-	GO:0046906//tetrapyrrole binding;GO:0005488//binding;GO:0009055//electron carrier activity;GO:0046914//transition metal ion binding;GO:0043167//ion binding;GO:0020037//heme binding;GO:0043169//cation binding;GO:0046872//metal ion binding;GO:0097159//organic cyclic compound binding;GO:1901363//heterocyclic compound binding;GO:0005506//iron ion binding	GO:0044710//single-organism metabolic process;GO:0008152//metabolic process;GO:0044699//single-organism process;GO:0055114//oxidation-reduction process
BnaA01g00600D	263.667	48.9367	9.61667	1.62333	153.513	35.6667	6.21667	1.35333	-2.56658	5.92e-18	-2.19962	6.61142e-10	PREDICTED: isoflavone 3'-hydroxylase-like [Brassica napus]	Metabolism	Global and Overview;Biosynthesis of other secondary metabolites;Metabolism of terpenoids and polyketides	ko01100//Metabolic pathways;ko01110//Biosynthesis of secondary metabolites;ko01120//Microbial metabolism in diverse environments;ko00945//Stilbenoid, diarylheptanoid and gingerol biosynthesis;ko00903//Limonene and pinene degradation	K00517	-	GO:0009055//electron carrier activity;GO:0046872//metal ion binding;GO:0043167//ion binding;GO:0097159//organic cyclic compound binding;GO:0005488//binding;GO:0020037//heme binding;GO:0005506//iron ion binding;GO:0043169//cation binding;GO:0046914//transition metal ion binding;GO:0046906//tetrapyrrole binding;GO:1901363//heterocyclic compound binding	GO:0044699//single-organism process;GO:0008152//metabolic process;GO:0055114//oxidation-reduction process;GO:0044710//single-organism metabolic process
BnaA01g00610D	603.88	582.373	46.7233	41.1367	1013.85	145.267	87.51	11.5833	-0.183718	0.53528	-2.9174	5.60979e-12	BnaA01g00610D [Brassica napus]	-	-	-	-	GO:0043229//intracellular organelle;GO:0043227//membrane-bounded organelle;GO:0043226//organelle;GO:0044464//cell part;GO:0005622//intracellular;GO:0044424//intracellular part;GO:0005623//cell;GO:0043231//intracellular membrane-bounded organelle	-	GO:0000003//reproduction;GO:0003006//developmental process involved in reproduction;GO:0022414//reproductive process;GO:0032502//developmental process
BnaA01g00660D	840.613	588.52	17.26	10.99	614.277	317.893	13.9933	6.88333	-0.651241	0.00571262	-1.02356	0.014477	BnaA01g00660D [Brassica napus]	-	-	-	-	GO:0044464//cell part;GO:0043229//intracellular organelle;GO:0044422//organelle part;GO:0043226//organelle;GO:0043231//intracellular membrane-bounded organelle;GO:0005737//cytoplasm;GO:0031967//organelle envelope;GO:0044435//plastid part;GO:0043227//membrane-bounded organelle;GO:0044446//intracellular organelle part;GO:0031975//envelope;GO:0044425//membrane part;GO:0016021//integral component of …	GO:0003824//catalytic activity;GO:0019829//cation-transporting ATPase activity;GO:0015399//primary active transmembrane transporter activity;GO:0016820//hydrolase activity, acting on acid anhydrides, catalyzing transmembrane movement of substances;GO:0005385//zinc ion transmembrane transporter activity;GO:0000166//nucleotide binding;GO:0016817//hydrolase activity, acting on acid anhydrides;GO:007…	GO:0098771//inorganic ion homeostasis;GO:0006875//cellular metal ion homeostasis;GO:0019725//cellular homeostasis;GO:0055065//metal ion homeostasis;GO:0048878//chemical homeostasis;GO:0055082//cellular chemical homeostasis;GO:0055080//cation homeostasis;GO:0009314//response to radiation;GO:0050896//response to stimulus;GO:0072507//divalent inorganic cation homeostasis;GO:0030003//cellular cation …
BnaA01g00670D	493.303	189.823	26.6767	9.31667	677.717	113.63	41.1367	6.49333	-1.51769	1.83e-05	-2.66339	9.60845e-18	BnaA01g00670D [Brassica napus]	-	-	-	-	GO:0043227//membrane-bounded organelle;GO:0005622//intracellular;GO:0044424//intracellular part;GO:0043229//intracellular organelle;GO:0043231//intracellular membrane-bounded organelle;GO:0005623//cell;GO:0043226//organelle;GO:0044464//cell part	GO:0005488//binding;GO:1901363//heterocyclic compound binding;GO:0044877//macromolecular complex binding;GO:0003676//nucleic acid binding;GO:0003682//chromatin binding;GO:0003677//DNA binding;GO:0097159//organic cyclic compound binding;GO:0001071//nucleic acid binding transcription factor activity	GO:0044249//cellular biosynthetic process;GO:0010467//gene expression;GO:1901698//response to nitrogen compound;GO:0006351//transcription, DNA-templated;GO:0046483//heterocycle metabolic process;GO:0008152//metabolic process;GO:0006725//cellular aromatic compound metabolic process;GO:0009059//macromolecule biosynthetic process;GO:0042221//response to chemical;GO:0006139//nucleobase-containing com…
BnaA01g00680D	43.5567	9.33333	1.10333	0.216667	31.61	26.6667	0.853333	0.683333	-2.34832	7.74e-06	-0.32052	0.764795	BnaA01g00680D [Brassica napus]	-	-	-	-	-	GO:0016301//kinase activity;GO:0043167//ion binding;GO:0000166//nucleotide binding;GO:0005524//ATP binding;GO:0032559//adenyl ribonucleotide binding;GO:0032549//ribonucleoside binding;GO:0016772//transferase activity, transferring phosphorus-containing groups;GO:0001882//nucleoside binding;GO:0097367//carbohydrate derivative binding;GO:0097159//organic cyclic compound binding;GO:0032555//purine r…	GO:0006793//phosphorus metabolic process;GO:0009987//cellular process;GO:0006468//protein phosphorylation;GO:0008152//metabolic process;GO:0044237//cellular metabolic process;GO:0006464//cellular protein modification process;GO:0044267//cellular protein metabolic process;GO:0019538//protein metabolic process;GO:0043170//macromolecule metabolic process;GO:0036211//protein modification process;GO:0…
BnaA01g00700D	106.21	80.73	2.34	1.61667	128.667	38.7867	3.12333	0.863333	-0.533486	0.0863118	-1.8551	1.63998e-07	BnaA01g00700D [Brassica napus]	-	-	-	-	GO:0016020//membrane	GO:0016758//transferase activity, transferring hexosyl groups;GO:0015018//galactosylgalactosylxylosylprotein 3-beta-glucuronosyltransferase activity;GO:0008194//UDP-glycosyltransferase activity;GO:0016740//transferase activity;GO:0015020//glucuronosyltransferase activity;GO:0003824//catalytic activity;GO:0016757//transferase activity, transferring glycosyl groups	-
BnaA01g00710D	5.33333	18	0.513333	1.57	2	9	0.213333	0.906667	1.6128	0.00838861	2.08746	0.0277055	BnaA01g00710D [Brassica napus]	-	-	-	-	-	GO:0097159//organic cyclic compound binding;GO:0003676//nucleic acid binding;GO:0003700//transcription factor activity, sequence-specific DNA binding;GO:0005488//binding;GO:1901363//heterocyclic compound binding;GO:0003677//DNA binding;GO:0001071//nucleic acid binding transcription factor activity	-
BnaA01g00730D	9.67	2.33333	0.43	0.1	6.67333	0	0.336667	0.001	-2.10434	0.0344393	-8.39518	0.000618273	PREDICTED: transcription factor SPATULA-like isoform X1 [Brassica napus]	-	-	-	-	-	GO:0005488//binding;GO:0005515//protein binding;GO:0046983//protein dimerization activity	-
BnaA01g00740D	226.647	117.027	11.94	5.89667	630.493	4.66667	37.5533	0.263333	-1.01783	0.270227	-7.15591	9.65172e-68	BnaA01g00740D [Brassica napus]	-	-	-	-	-	GO:0032549//ribonucleoside binding;GO:0097159//organic cyclic compound binding;GO:0036094//small molecule binding;GO:0004674//protein serine/threonine kinase activity;GO:0032553//ribonucleotide binding;GO:0016773//phosphotransferase activity, alcohol group as acceptor;GO:0035639//purine ribonucleoside triphosphate binding;GO:0032559//adenyl ribonucleotide binding;GO:0017076//purine nucleotide bin…	GO:0044260//cellular macromolecule metabolic process;GO:0009987//cellular process;GO:0006464//cellular protein modification process;GO:0044237//cellular metabolic process;GO:0006796//phosphate-containing compound metabolic process;GO:0044267//cellular protein metabolic process;GO:0016310//phosphorylation;GO:0071704//organic substance metabolic process;GO:0043170//macromolecule metabolic process;G…
BnaA01g00760D	120.667	9.33333	4.92	0.356667	126.413	52.3333	5.79	2.31	-3.78601	4.84e-16	-1.32567	0.00425244	BnaA01g00760D [Brassica napus]	-	-	-	-	GO:0005737//cytoplasm;GO:0043231//intracellular membrane-bounded organelle;GO:0016020//membrane;GO:0043226//organelle;GO:0009536//plastid;GO:0044424//intracellular part;GO:0005623//cell;GO:0044464//cell part;GO:0043229//intracellular organelle;GO:0043227//membrane-bounded organelle;GO:0005622//intracellular;GO:0044444//cytoplasmic part	-	-
BnaA01g00770D	402.267	231.667	11.21	5.87333	458.667	105.333	14.1067	3.05333	-0.932535	9.64e-05	-2.20792	8.87957e-11	BnaA01g00770D [Brassica napus]	-	-	-	-	GO:0043227//membrane-bounded organelle;GO:0005622//intracellular;GO:0043226//organelle;GO:0044464//cell part;GO:0005623//cell;GO:0043231//intracellular membrane-bounded organelle;GO:0044424//intracellular part;GO:0043229//intracellular organelle	-	-
BnaA01g00780D	975.25	573.827	60.7667	32.8967	516.01	179.35	35.86	11.7467	-0.885339	0.000444253	-1.61012	8.84918e-07	BnaA01g00780D [Brassica napus]	Metabolism	Global and Overview;Metabolism of cofactors and vitamins	ko01110//Biosynthesis of secondary metabolites;ko00860//Porphyrin and chlorophyll metabolism	K13545	GO:0031967//organelle envelope;GO:0043227//membrane-bounded organelle;GO:0009532//plastid stroma;GO:0044444//cytoplasmic part;GO:0043226//organelle;GO:0031975//envelope;GO:0044464//cell part;GO:0005622//intracellular;GO:0005623//cell;GO:0043231//intracellular membrane-bounded organelle;GO:0043229//intracellular organelle;GO:0044422//organelle part;GO:0044446//intracellular organelle part;GO:00057…	GO:0005488//binding;GO:0016627//oxidoreductase activity, acting on the CH-CH group of donors;GO:0016491//oxidoreductase activity;GO:0003824//catalytic activity;GO:0016636//oxidoreductase activity, acting on the CH-CH group of donors, iron-sulfur protein as acceptor	GO:0044237//cellular metabolic process;GO:0006720//isoprenoid metabolic process;GO:0006778//porphyrin-containing compound metabolic process;GO:0044282//small molecule catabolic process;GO:0006950//response to stress;GO:0043170//macromolecule metabolic process;GO:0006725//cellular aromatic compound metabolic process;GO:0008219//cell death;GO:0046483//heterocycle metabolic process;GO:0044281//small…
BnaA01g00790D	138.307	28.85	5.06	0.95	126.347	129.807	5.18667	4.76667	-2.41314	1.78e-12	-0.121827	0.898487	BnaA01g00790D [Brassica napus]	Organismal Systems	Environmental adaptation	ko04626//Plant-pathogen interaction	K13448	GO:0044424//intracellular part;GO:0016020//membrane;GO:0044464//cell part;GO:0005623//cell;GO:0005622//intracellular	GO:0005509//calcium ion binding;GO:0005488//binding;GO:0043167//ion binding;GO:0043169//cation binding;GO:0046872//metal ion binding	GO:0030855//epithelial cell differentiation;GO:0044260//cellular macromolecule metabolic process;GO:0043170//macromolecule metabolic process;GO:0006139//nucleobase-containing compound metabolic process;GO:0009826//unidimensional cell growth;GO:0051640//organelle localization;GO:0044763//single-organism cellular process;GO:0009888//tissue development;GO:0060429//epithelium development;GO:0060560//…
BnaA01g00800D	381.667	217.943	17.73	9.20333	314.887	91.8133	16.22	4.61	-0.945964	5.13e-05	-1.81494	0.000112395	BnaA01g00800D [Brassica napus]	-	-	-	-	GO:0043226//organelle;GO:0043227//membrane-bounded organelle;GO:0005737//cytoplasm;GO:0005622//intracellular;GO:0009536//plastid;GO:0005623//cell;GO:0044464//cell part;GO:0044424//intracellular part;GO:0043231//intracellular membrane-bounded organelle;GO:0043229//intracellular organelle;GO:0044444//cytoplasmic part	GO:0008233//peptidase activity;GO:0008238//exopeptidase activity;GO:0016787//hydrolase activity;GO:0008235//metalloexopeptidase activity;GO:0003824//catalytic activity;GO:0008237//metallopeptidase activity;GO:0070011//peptidase activity, acting on L-amino acid peptides;GO:0004177//aminopeptidase activity	GO:0016093//polyprenol metabolic process;GO:0009058//biosynthetic process;GO:0044238//primary metabolic process;GO:0006720//isoprenoid metabolic process;GO:0044763//single-organism cellular process;GO:0046165//alcohol biosynthetic process;GO:0001101//response to acid chemical;GO:0008610//lipid biosynthetic process;GO:0006629//lipid metabolic process;GO:1901615//organic hydroxy compound metabolic …
BnaA01g00850D	333.18	40.8467	9.57	1.07333	268.113	42.3967	8.58	1.24	-3.15642	3.56e-22	-2.79064	1.41453e-15	BnaA01g00850D [Brassica napus]	-	-	-	-	GO:0043226//organelle;GO:0044424//intracellular part;GO:0043229//intracellular organelle;GO:0043227//membrane-bounded organelle;GO:0005622//intracellular;GO:0005623//cell;GO:0043231//intracellular membrane-bounded organelle;GO:0044464//cell part	-	-
BnaA01g00870D	7.27667	1	0.233333	0.03	14.3333	0.333333	0.493333	0.01	-2.95936	0.00670062	-5.62449	2.56689e-05	BnaA01g00870D [Brassica napus]	-	-	-	-	-	GO:0043168//anion binding;GO:0097159//organic cyclic compound binding;GO:0005488//binding;GO:1901363//heterocyclic compound binding;GO:0030170//pyridoxal phosphate binding;GO:0048037//cofactor binding;GO:0003824//catalytic activity;GO:0043167//ion binding	-
BnaA01g00880D	57.1	18.3333	2.44667	0.723333	64.6667	9	3.11333	0.386667	-1.75809	4.03e-06	-3.0093	1.85972e-07	BnaA01g00880D [Brassica napus]	-	-	-	-	-	-	-
BnaA01g00890D	80.0833	21	2.92333	0.71	72.24	13	2.91667	0.486667	-2.04172	2.98e-08	-2.58331	6.90951e-09	BnaA01g00890D [Brassica napus]	Genetic Information Processing	Translation	ko03013//RNA transport	K14307	-	-	-
BnaA01g00920D	7.04	18.6667	0.31	0.773333	33.3333	7.33333	1.71333	0.376667	1.31882	0.198027	-2.18545	0.00864613	BnaA01g00920D [Brassica napus]	-	-	-	-	-	GO:0003676//nucleic acid binding;GO:0003677//DNA binding;GO:0005488//binding;GO:0003682//chromatin binding;GO:0044877//macromolecular complex binding;GO:0097159//organic cyclic compound binding;GO:1901363//heterocyclic compound binding;GO:0001071//nucleic acid binding transcription factor activity	GO:0097659//nucleic acid-templated transcription;GO:0006139//nucleobase-containing compound metabolic process;GO:1901360//organic cyclic compound metabolic process;GO:0018130//heterocycle biosynthetic process;GO:0019438//aromatic compound biosynthetic process;GO:0034641//cellular nitrogen compound metabolic process;GO:0009987//cellular process;GO:0009059//macromolecule biosynthetic process;GO:000…
BnaA01g00930D	1125.45	603.737	63.6	31.4467	841.593	462.497	52.94	27.6033	-1.01612	5.63e-05	-0.939516	0.0144071	PREDICTED: thioredoxin-like protein HCF164, chloroplastic [Brassica napus]	-	-	-	-	GO:0009579//thylakoid;GO:0031984//organelle subcompartment;GO:0044435//plastid part;GO:0009507//chloroplast;GO:0044436//thylakoid part;GO:0044464//cell part;GO:0044424//intracellular part;GO:0009532//plastid stroma;GO:0043229//intracellular organelle;GO:0044444//cytoplasmic part;GO:0009536//plastid;GO:0031976//plastid thylakoid;GO:0005623//cell;GO:0044422//organelle part;GO:0005622//intracellular…	GO:0009055//electron carrier activity;GO:0015036//disulfide oxidoreductase activity;GO:0016667//oxidoreductase activity, acting on a sulfur group of donors;GO:0003824//catalytic activity;GO:0015035//protein disulfide oxidoreductase activity;GO:0016491//oxidoreductase activity	GO:0006662//glycerol ether metabolic process;GO:1901659//glycosyl compound biosynthetic process;GO:0019725//cellular homeostasis;GO:1901657//glycosyl compound metabolic process;GO:1901137//carbohydrate derivative biosynthetic process;GO:0065008//regulation of biological quality;GO:0043933//macromolecular complex subunit organization;GO:0044281//small molecule metabolic process;GO:1901135//carbohy…
BnaA01g00940D	35.6667	15.3333	1.58333	0.636667	69.6667	19.6667	3.50667	0.923333	-1.31435	0.0179939	-1.92518	0.00212042	BnaA01g00940D [Brassica napus]	-	-	-	-	-	GO:0005515//protein binding;GO:0005488//binding	GO:0007389//pattern specification process;GO:0060255//regulation of macromolecule metabolic process;GO:0043414//macromolecule methylation;GO:0006139//nucleobase-containing compound metabolic process;GO:0040029//regulation of gene expression, epigenetic;GO:0016043//cellular component organization;GO:0051252//regulation of RNA metabolic process;GO:0031323//regulation of cellular metabolic process;G…
BnaA01g00960D	10.6667	30	0.876667	2.27667	15	15.6667	1.38667	1.42	1.37682	0.00407211	0.0342699	1	BnaC03g61750D [Brassica napus]	-	-	-	-	-	-	-
BnaA01g00970D	87.7867	54.0033	3.25	1.84	97.38	29.72	4.02667	1.16	-0.820734	0.00809849	-1.79546	8.41271e-06	BnaA01g00970D [Brassica napus]	Genetic Information Processing	Folding, sorting and degradation	ko04122//Sulfur relay system	K14169	GO:0005622//intracellular;GO:0005623//cell;GO:0044464//cell part;GO:0044424//intracellular part	-	-
BnaA01g00980D	379.697	283.667	8.56	5.86333	274.113	93.3233	6.93667	2.22	-0.54589	0.0269411	-1.64368	1.54517e-05	BnaA01g00980D [Brassica napus]	-	-	-	-	-	GO:0005488//binding;GO:0097159//organic cyclic compound binding;GO:0043565//sequence-specific DNA binding;GO:0003677//DNA binding;GO:0003700//transcription factor activity, sequence-specific DNA binding;GO:0001071//nucleic acid binding transcription factor activity;GO:0003676//nucleic acid binding;GO:1901363//heterocyclic compound binding	-
BnaA01g00990D	128.243	65.4633	3.53333	1.64667	170.167	52.7133	5.21667	1.49333	-1.10148	0.000126921	-1.80459	1.35077e-05	BnaA01g00990D [Brassica napus]	-	-	-	-	-	GO:0005488//binding;GO:0043169//cation binding;GO:0043167//ion binding;GO:0046914//transition metal ion binding;GO:0046872//metal ion binding;GO:0008270//zinc ion binding	-
BnaA01g01020D	413.163	102.213	18.1767	4.08667	335.753	69.1067	16.3733	3.14	-2.15309	1.26e-18	-2.38251	3.67728e-08	BnaA01g01020D [Brassica napus]	Metabolism	Global and Overview;Metabolism of terpenoids and polyketides	ko01100//Metabolic pathways;ko01110//Biosynthesis of secondary metabolites;ko01130//Biosynthesis of antibiotics;ko00900//Terpenoid backbone biosynthesis	K13789	GO:0005623//cell;GO:0044444//cytoplasmic part;GO:0009536//plastid;GO:0005622//intracellular;GO:0005737//cytoplasm;GO:0043226//organelle;GO:0044424//intracellular part;GO:0043229//intracellular organelle;GO:0043231//intracellular membrane-bounded organelle;GO:0044464//cell part;GO:0043227//membrane-bounded organelle	GO:0016765//transferase activity, transferring alkyl or aryl (other than methyl) groups;GO:0016740//transferase activity;GO:0005488//binding;GO:0004659//prenyltransferase activity;GO:0003824//catalytic activity	GO:0044272//sulfur compound biosynthetic process;GO:0016144//S-glycoside biosynthetic process;GO:0009058//biosynthetic process;GO:0016143//S-glycoside metabolic process;GO:0019748//secondary metabolic process;GO:0044237//cellular metabolic process;GO:0044550//secondary metabolite biosynthetic process;GO:1901137//carbohydrate derivative biosynthetic process;GO:0043436//oxoacid metabolic process;GO…
BnaA01g01030D	66.0467	30.9267	2.55667	1.11	103.277	19.6667	4.46333	0.79	-1.2037	0.00222174	-2.4982	1.8169e-10	BnaA01g01030D [Brassica napus]	-	-	-	-	GO:0005622//intracellular;GO:0016020//membrane;GO:0043229//intracellular organelle;GO:0044424//intracellular part;GO:0043227//membrane-bounded organelle;GO:0031224//intrinsic component of membrane;GO:0016021//integral component of membrane;GO:0005623//cell;GO:0044425//membrane part;GO:0044464//cell part;GO:0043231//intracellular membrane-bounded organelle;GO:0043226//organelle	GO:0005215//transporter activity;GO:0022892//substrate-specific transporter activity;GO:0022857//transmembrane transporter activity;GO:0022891//substrate-specific transmembrane transporter activity	GO:0051234//establishment of localization;GO:0009987//cellular process;GO:0006810//transport;GO:0051179//localization;GO:0044699//single-organism process;GO:0044765//single-organism transport;GO:0006811//ion transport;GO:0044763//single-organism cellular process;GO:0006820//anion transport;GO:1902578//single-organism localization;GO:0015698//inorganic anion transport;GO:0055085//transmembrane tra…
BnaA01g01040D	913.217	167.487	38.5967	6.43	1198.55	94.01	56.71	4.18	-2.58559	2.4e-18	-3.76203	6.18484e-30	PREDICTED: BES1/BZR1 homolog protein 2 [Brassica rapa]	Environmental Information Processing	Signal transduction	ko04075//Plant hormone signal transduction	K14503	-	-	-
BnaA01g01080D	77.6667	90.3333	5.51	5.91	63	29	4.98667	2.22	0.101106	0.864234	-1.16752	0.0293208	BnaA01g01080D [Brassica napus]	Metabolism	Global and Overview;Metabolism of cofactors and vitamins	ko01110//Biosynthesis of secondary metabolites;ko00130//Ubiquinone and other terpenoid-quinone biosynthesis	K03809	GO:0016020//membrane	GO:0003824//catalytic activity;GO:0005488//binding;GO:1901363//heterocyclic compound binding;GO:0000166//nucleotide binding;GO:0048037//cofactor binding;GO:0050662//coenzyme binding;GO:0016491//oxidoreductase activity;GO:0097367//carbohydrate derivative binding;GO:0036094//small molecule binding;GO:0032553//ribonucleotide binding;GO:1901265//nucleoside phosphate binding;GO:0010181//FMN binding;GO…	-
BnaA01g01100D	240.867	890.337	12.1967	41.49	353.967	448.917	19.9667	24.6133	1.76628	5.15e-14	0.301847	0.545932	BnaA01g01100D [Brassica napus]	-	-	-	-	GO:0043227//membrane-bounded organelle;GO:0043229//intracellular organelle;GO:0044464//cell part;GO:0043231//intracellular membrane-bounded organelle;GO:0005623//cell;GO:0043226//organelle;GO:0044424//intracellular part;GO:0005634//nucleus;GO:0005622//intracellular	GO:0003700//transcription factor activity, sequence-specific DNA binding;GO:0003677//DNA binding;GO:0003676//nucleic acid binding;GO:0043565//sequence-specific DNA binding;GO:0005488//binding;GO:1901363//heterocyclic compound binding;GO:0097159//organic cyclic compound binding;GO:0001071//nucleic acid binding transcription factor activity	-
BnaA01g01110D	1	7.9	0.09	0.653333	0.333333	3.16667	0.0333333	0.306667	2.85982	0.0196203	3.20163	0.110408	BnaA01g01110D [Brassica napus]	-	-	-	-	-	-	-
BnaA01g01120D	97.3333	809	3.80333	28.4967	84.6167	322.333	3.63	13.3867	2.90546	2.96e-30	1.88276	2.94528e-06	PREDICTED: scarecrow-like protein 15 [Brassica rapa]	-	-	-	-	-	-	-
BnaA01g01150D	108.593	27.0367	6.88	1.56667	73.9567	13.3333	5.29667	0.85	-2.13471	6.28e-09	-2.63955	7.31452e-08	BnaA01g01150D [Brassica napus]	-	-	-	-	-	-	-
BnaA01g01170D	94	219	5.03333	10.7467	89	91.34	5.32	5.14333	1.0943	1.43e-05	-0.0487226	0.9985	BnaA01g01170D [Brassica napus]	-	-	-	-	-	GO:0005488//binding;GO:0005515//protein binding	-
BnaA01g01180D	121.93	305.1	5.06	11.6833	113.667	146.833	5.29333	6.38333	1.20724	1.23e-06	0.270133	0.547944	BnaA01g01180D [Brassica napus]	-	-	-	-	-	-	-
BnaA01g01210D	98.2	31.67	1.45	0.433333	189.967	34	3.14333	0.503333	-1.7425	7.28e-07	-2.64271	7.43954e-14	BnaA01g01210D [Brassica napus]	-	-	-	-	-	-	-
BnaA01g01220D	23.8033	3.61667	3.59333	0.513333	83.8667	1	14.39	0.156667	-2.80735	0.01722	-6.52122	3.11145e-15	BnaA01g01220D [Brassica napus]	-	-	-	-	-	-	-
BnaA01g01230D	12.54	6.91	1.88333	0.93	214.077	9.18	36.91	1.37	-1.01799	0.497058	-4.75176	2.73197e-22	BnaA01g01230D [Brassica napus]	-	-	-	-	-	-	-
BnaA01g01240D	46.55	18.6433	2.34667	0.846667	56.2833	29.8867	3.17667	1.50667	-1.47075	0.00410335	-1.07615	0.0397878	BnaA01g01240D [Brassica napus]	-	-	-	-	-	GO:0016741//transferase activity, transferring one-carbon groups;GO:0003824//catalytic activity;GO:0016740//transferase activity;GO:0008168//methyltransferase activity	-
BnaA01g01250D	54.3333	8	1.97667	0.263333	17	14.3333	0.696667	0.513333	-2.90811	4.37e-08	-0.440573	0.606819	BnaA01g01250D [Brassica napus]	Metabolism	Lipid metabolism;Global and Overview	ko01100//Metabolic pathways;ko00600//Sphingolipid metabolism	K00654	GO:0043229//intracellular organelle;GO:0044464//cell part;GO:0005737//cytoplasm;GO:0009536//plastid;GO:0043227//membrane-bounded organelle;GO:0043226//organelle;GO:0044424//intracellular part;GO:0044444//cytoplasmic part;GO:0043231//intracellular membrane-bounded organelle;GO:0005623//cell;GO:0005622//intracellular	GO:0016747//transferase activity, transferring acyl groups other than amino-acyl groups;GO:0030170//pyridoxal phosphate binding;GO:0097159//organic cyclic compound binding;GO:1901363//heterocyclic compound binding;GO:0048037//cofactor binding;GO:0003824//catalytic activity;GO:0043167//ion binding;GO:0016740//transferase activity;GO:0016746//transferase activity, transferring acyl groups;GO:001645…	GO:0006665//sphingolipid metabolic process;GO:0008219//cell death;GO:0044255//cellular lipid metabolic process;GO:0016265//death;GO:0006629//lipid metabolic process;GO:0012501//programmed cell death;GO:0040007//growth;GO:0006807//nitrogen compound metabolic process;GO:0008152//metabolic process;GO:0044710//single-organism metabolic process;GO:0044763//single-organism cellular process;GO:0044237//…
BnaA01g01270D	102.287	34.3467	3.2	0.986667	47.3967	21.39	1.64667	0.716667	-1.69744	2.44e-08	-1.20017	0.0172253	BnaA01g01270D [Brassica napus]	-	-	-	-	-	-	-
BnaA01g01300D	19	6	1.75333	0.476667	20.3333	5.33333	2.00333	0.463333	-1.87905	0.0119229	-2.11228	0.0146	PREDICTED: probable ubiquitin-conjugating enzyme E2 17 [Brassica rapa]	Genetic Information Processing	Folding, sorting and degradation	ko04120//Ubiquitin mediated proteolysis	K10688	GO:0005623//cell;GO:0005622//intracellular;GO:0043226//organelle;GO:0044424//intracellular part;GO:0043229//intracellular organelle;GO:0043231//intracellular membrane-bounded organelle;GO:0043227//membrane-bounded organelle;GO:0044464//cell part	GO:0003824//catalytic activity;GO:0016874//ligase activity;GO:0016881//acid-amino acid ligase activity;GO:0016879//ligase activity, forming carbon-nitrogen bonds	GO:0009987//cellular process;GO:0043632//modification-dependent macromolecule catabolic process;GO:0071704//organic substance metabolic process;GO:0044238//primary metabolic process;GO:0006508//proteolysis;GO:0009056//catabolic process;GO:0044260//cellular macromolecule metabolic process;GO:0042221//response to chemical;GO:0051603//proteolysis involved in cellular protein catabolic process;GO:004…
BnaA01g01320D	3.66667	25.6767	0.133333	0.843333	12.7367	8	0.503333	0.286667	2.66107	9.86e-05	-0.81214	0.371928	BnaA01g01320D [Brassica napus]	Metabolism	Metabolism of terpenoids and polyketides;Global and Overview	ko01100//Metabolic pathways;ko01110//Biosynthesis of secondary metabolites;ko00905//Brassinosteroid biosynthesis	K12637	-	GO:0043169//cation binding;GO:0020037//heme binding;GO:0046872//metal ion binding;GO:0046914//transition metal ion binding;GO:0043167//ion binding;GO:0004497//monooxygenase activity;GO:0097159//organic cyclic compound binding;GO:0005488//binding;GO:0016491//oxidoreductase activity;GO:0009055//electron carrier activity;GO:0005506//iron ion binding;GO:1901363//heterocyclic compound binding;GO:00469…	GO:0055114//oxidation-reduction process;GO:0008152//metabolic process;GO:0044710//single-organism metabolic process;GO:0044699//single-organism process
BnaA01g01330D	590.69	2128.15	9.42667	30.7433	600.963	1950.88	10.5233	30.7867	1.70545	5.79e-10	1.54871	1.59509e-06	BnaA01g01330D [Brassica napus]	-	-	-	-	-	GO:0016787//hydrolase activity;GO:0016798//hydrolase activity, acting on glycosyl bonds;GO:0003824//catalytic activity;GO:0004553//hydrolase activity, hydrolyzing O-glycosyl compounds;GO:0015925//galactosidase activity;GO:0030246//carbohydrate binding;GO:0005488//binding	GO:0044085//cellular component biogenesis;GO:0044238//primary metabolic process;GO:0009987//cellular process;GO:0016043//cellular component organization;GO:0034641//cellular nitrogen compound metabolic process;GO:0010073//meristem maintenance;GO:0032502//developmental process;GO:0006576//cellular biogenic amine metabolic process;GO:0044237//cellular metabolic process;GO:0006807//nitrogen compound…
BnaA01g01340D	161.963	90.1733	2.14	1.09	215.64	70.9733	3.16333	0.953333	-0.973283	0.000244875	-1.73039	3.07431e-09	BnaA01g01340D [Brassica napus]	-	-	-	-	-	GO:0000166//nucleotide binding;GO:0097159//organic cyclic compound binding;GO:0005524//ATP binding;GO:0017076//purine nucleotide binding;GO:0032553//ribonucleotide binding;GO:0001883//purine nucleoside binding;GO:0043168//anion binding;GO:0097367//carbohydrate derivative binding;GO:0032559//adenyl ribonucleotide binding;GO:0032550//purine ribonucleoside binding;GO:0043167//ion binding;GO:0036094/…	-
BnaA01g01410D	272.997	1215.23	6.68667	27.1867	192.06	1049.69	5.23667	26.71	2.02354	7.68e-18	2.35066	5.86359e-18	BnaA01g01410D [Brassica napus]	-	-	-	-	-	-	-
BnaA01g01430D	52.3333	13.6667	0.9	0.216667	25.6667	11	0.49	0.196667	-2.05445	7.68e-07	-1.31703	0.0225982	BnaA01g01430D [Brassica napus]	-	-	-	-	-	GO:0032549//ribonucleoside binding;GO:0003824//catalytic activity;GO:0032555//purine ribonucleotide binding;GO:0004674//protein serine/threonine kinase activity;GO:0032559//adenyl ribonucleotide binding;GO:1901265//nucleoside phosphate binding;GO:0004713//protein tyrosine kinase activity;GO:0016740//transferase activity;GO:0016772//transferase activity, transferring phosphorus-containing groups;G…	GO:0006796//phosphate-containing compound metabolic process;GO:0044260//cellular macromolecule metabolic process;GO:0019538//protein metabolic process;GO:0008152//metabolic process;GO:0043170//macromolecule metabolic process;GO:0006793//phosphorus metabolic process;GO:0071704//organic substance metabolic process;GO:0036211//protein modification process;GO:0044238//primary metabolic process;GO:004…
BnaA01g01480D	93.4833	21.07	2.16333	0.453333	54.3333	68.67	1.40667	1.68	-2.25461	8.55e-10	0.256181	0.710968	BnaA01g01480D [Brassica napus]	-	-	-	-	-	-	-
BnaA01g01500D	37.6167	15	1.88	0.703333	60	47	3.31333	2.49667	-1.41845	0.0321295	-0.40828	0.551308	BnaA01g01500D [Brassica napus]	-	-	-	-	GO:0043229//intracellular organelle;GO:0043231//intracellular membrane-bounded organelle;GO:0043227//membrane-bounded organelle;GO:0043226//organelle;GO:0005623//cell;GO:0005622//intracellular;GO:0044464//cell part;GO:0044424//intracellular part	-	-
BnaA01g01510D	1.33333	0.666667	0.0566667	0.0233333	22.2467	2.33333	0.99	0.0933333	-1.28011	0.856075	-3.40696	0.000643526	BnaA01g01510D [Brassica napus]	-	-	-	-	-	GO:0003824//catalytic activity;GO:0016491//oxidoreductase activity	GO:0044699//single-organism process;GO:0008152//metabolic process;GO:0055114//oxidation-reduction process;GO:0044710//single-organism metabolic process
BnaA01g01550D	78.3333	595.807	5.30333	37.7233	31.9733	312.433	2.43333	22.36	2.83049	1.26e-10	3.19991	4.40068e-16	BnaA01g01550D [Brassica napus]	-	-	-	-	-	-	-
BnaA01g01560D	91.3333	345.333	5.66667	19.5167	83	169.667	5.63667	10.6833	1.78413	1.53e-10	0.922448	0.00375098	BnaA01g01560D [Brassica napus]	-	-	-	-	-	GO:0043167//ion binding;GO:0097159//organic cyclic compound binding;GO:0003677//DNA binding;GO:0046872//metal ion binding;GO:0005488//binding;GO:0003676//nucleic acid binding;GO:0008270//zinc ion binding;GO:0043169//cation binding;GO:1901363//heterocyclic compound binding;GO:0046914//transition metal ion binding	-
BnaA01g01570D	36.6667	4772.76	1.54667	179.677	21.5	1985.99	0.973333	84.3867	6.8601	1.5e-67	6.43794	6.43749e-55	BnaA01g01570D [Brassica napus]	-	-	-	-	-	-	-
BnaA01g01580D	22.3333	11.3333	1.38333	0.626667	21.7	5.33333	1.49333	0.343333	-1.14238	0.0497227	-2.12085	0.000493391	BnaA01g01580D [Brassica napus]	Metabolism	Amino acid metabolism	ko00310//Lysine degradation	K18826	-	-	-
BnaA01g01630D	85.5267	57.2833	2.64	1.64333	90.84	28.6033	3.10333	0.88	-0.683913	0.0876189	-1.81824	8.90013e-05	BnaA01g01630D [Brassica napus]	-	-	-	-	-	-	-
BnaA01g01660D	50.7033	22.6667	1.54667	0.643333	76	40.6667	2.51333	1.21333	-1.26552	0.024776	-1.05063	0.021439	BnaA01g01660D [Brassica napus]	-	-	-	-	-	GO:0004175//endopeptidase activity;GO:0070011//peptidase activity, acting on L-amino acid peptides;GO:0008233//peptidase activity;GO:0070001//aspartic-type peptidase activity;GO:0003824//catalytic activity;GO:0004190//aspartic-type endopeptidase activity;GO:0016787//hydrolase activity	GO:0008152//metabolic process;GO:0071704//organic substance metabolic process;GO:0006508//proteolysis;GO:0044238//primary metabolic process;GO:0043170//macromolecule metabolic process;GO:0019538//protein metabolic process
BnaA01g01670D	400.627	2098.65	26.44	127.08	333.24	2057.61	24.4433	143.34	2.26494	7.15e-20	2.55193	3.38554e-15	PREDICTED: ras-related protein RABB1b-like [Brassica rapa]	-	-	-	-	GO:0043229//intracellular organelle;GO:0044444//cytoplasmic part;GO:0043227//membrane-bounded organelle;GO:0005623//cell;GO:0005737//cytoplasm;GO:0044464//cell part;GO:0043226//organelle;GO:0016020//membrane;GO:0043231//intracellular membrane-bounded organelle;GO:0009536//plastid;GO:0005622//intracellular;GO:0044424//intracellular part	GO:0032553//ribonucleotide binding;GO:0097367//carbohydrate derivative binding;GO:0097159//organic cyclic compound binding;GO:0043168//anion binding;GO:0016818//hydrolase activity, acting on acid anhydrides, in phosphorus-containing anhydrides;GO:0019001//guanyl nucleotide binding;GO:0000166//nucleotide binding;GO:0032549//ribonucleoside binding;GO:0017111//nucleoside-triphosphatase activity;GO:0…	GO:0008104//protein localization;GO:0051716//cellular response to stimulus;GO:0007165//signal transduction;GO:0044699//single-organism process;GO:1902578//single-organism localization;GO:0007264//small GTPase mediated signal transduction;GO:0051641//cellular localization;GO:0050896//response to stimulus;GO:0016482//cytoplasmic transport;GO:0006913//nucleocytoplasmic transport;GO:0051234//establis…
BnaA01g01690D	75.1167	397.023	3.65333	17.6433	66.2467	181.35	3.54333	9.01667	2.27184	4.61e-13	1.34749	2.41208e-05	PREDICTED: NEP1-interacting protein 1 [Brassica rapa]	-	-	-	-	-	GO:0043169//cation binding;GO:0046914//transition metal ion binding;GO:0046872//metal ion binding;GO:0005515//protein binding;GO:0043167//ion binding;GO:0005488//binding;GO:0008270//zinc ion binding	-
BnaA01g01700D	1009.92	468.523	18.3	7.74667	1194.8	541.553	23.9933	10.0633	-1.2402	2.22e-05	-1.25353	9.24767e-07	BnaA01g01700D [Brassica napus]	Metabolism	Global and Overview;Carbohydrate metabolism	ko01100//Metabolic pathways;ko01110//Biosynthesis of secondary metabolites;ko01130//Biosynthesis of antibiotics;ko01120//Microbial metabolism in diverse environments;ko01200//Carbon metabolism;ko01230//Biosynthesis of amino acids;ko01210//2-Oxocarboxylic acid metabolism;ko00630//Glyoxylate and dicarboxylate metabolism;ko00020//Citrate cycle (TCA cycle)	K01681	GO:0005622//intracellular;GO:0043227//membrane-bounded organelle;GO:0005576//extracellular region;GO:0005623//cell;GO:0043226//organelle;GO:0030054//cell junction;GO:0005737//cytoplasm;GO:0044424//intracellular part;GO:0043229//intracellular organelle;GO:0016020//membrane;GO:0043231//intracellular membrane-bounded organelle;GO:0044444//cytoplasmic part;GO:0044464//cell part;GO:0005911//cell-cell …	GO:0046914//transition metal ion binding;GO:0016835//carbon-oxygen lyase activity;GO:0016491//oxidoreductase activity;GO:0097159//organic cyclic compound binding;GO:0046872//metal ion binding;GO:0003729//mRNA binding;GO:0044822//poly(A) RNA binding;GO:0016641//oxidoreductase activity, acting on the CH-NH2 group of donors, oxygen as acceptor;GO:0016829//lyase activity;GO:0043167//ion binding;GO:19…	GO:0006979//response to oxidative stress;GO:0050896//response to stimulus;GO:0006810//transport;GO:1901700//response to oxygen-containing compound;GO:0019752//carboxylic acid metabolic process;GO:0071840//cellular component organization or biogenesis;GO:0006970//response to osmotic stress;GO:0044260//cellular macromolecule metabolic process;GO:0051716//cellular response to stimulus;GO:0071496//ce…
BnaA01g01750D	59.4767	112.49	0.413333	0.716667	45.4733	159.777	0.346667	1.14	0.793997	0.00638053	1.71741	6.61736e-07	BnaA01g01750D [Brassica napus]	Genetic Information Processing;Metabolism	Nucleotide metabolism;Transcription;Global and Overview	ko01100//Metabolic pathways;ko00230//Purine metabolism;ko00240//Pyrimidine metabolism;ko03020//RNA polymerase	K03006	-	GO:0016740//transferase activity;GO:0003677//DNA binding;GO:1901363//heterocyclic compound binding;GO:0003676//nucleic acid binding;GO:0034062//RNA polymerase activity;GO:0005515//protein binding;GO:0097159//organic cyclic compound binding;GO:0003824//catalytic activity;GO:0005488//binding;GO:0016779//nucleotidyltransferase activity;GO:0016772//transferase activity, transferring phosphorus-contai…	GO:0044260//cellular macromolecule metabolic process;GO:0009058//biosynthetic process;GO:0010467//gene expression;GO:0071704//organic substance metabolic process;GO:0097659//nucleic acid-templated transcription;GO:0006366//transcription from RNA polymerase II promoter;GO:0006139//nucleobase-containing compound metabolic process;GO:0009987//cellular process;GO:0016070//RNA metabolic process;GO:000…
BnaA01g01760D	7.33333	1	0.386667	0.0466667	12.45	2.66667	0.75	0.146667	-3.05063	0.00571386	-2.35435	0.0104781	BnaA01g01760D [Brassica napus]	Genetic Information Processing	Transcription	ko03040//Spliceosome	K12897	GO:0032991//macromolecular complex	GO:0003676//nucleic acid binding;GO:0000166//nucleotide binding;GO:1901265//nucleoside phosphate binding;GO:0097159//organic cyclic compound binding;GO:0036094//small molecule binding;GO:0005488//binding;GO:1901363//heterocyclic compound binding	-
BnaA01g01790D	335.263	163.333	12.5033	5.57333	208.197	154.667	8.63667	5.88333	-1.1657	7.52e-07	-0.553841	0.0724736	BnaA01g01790D [Brassica napus]	-	-	-	-	-	-	-
BnaA01g01800D	490.217	257.31	27.26	13.11	477.187	210.317	29.49	11.97	-1.05612	0.00017903	-1.3008	1.67176e-06	PREDICTED: ganglioside-induced differentiation-associated protein 2-like [Brassica napus]	-	-	-	-	GO:0005623//cell;GO:0044464//cell part;GO:0005622//intracellular;GO:0044424//intracellular part	-	-
BnaA01g01840D	1.33333	14.6667	0.0966667	1.02	3	13.8833	0.26	1.11667	3.39941	0.000439637	2.10262	0.011547	BnaA01g01840D [Brassica napus]	-	-	-	-	GO:0005737//cytoplasm;GO:0005622//intracellular;GO:0043226//organelle;GO:0043227//membrane-bounded organelle;GO:0043229//intracellular organelle;GO:0043231//intracellular membrane-bounded organelle;GO:0009536//plastid;GO:0005623//cell;GO:0044464//cell part;GO:0044444//cytoplasmic part;GO:0044424//intracellular part	-	-
BnaA01g01870D	90.3967	313.773	3.94667	12.6867	199.157	159.39	9.74333	7.23667	1.68461	3.39e-08	-0.42909	0.224273	BnaA01g01870D [Brassica napus]	-	-	-	-	-	GO:0004674//protein serine/threonine kinase activity;GO:0036094//small molecule binding;GO:0016740//transferase activity;GO:0016301//kinase activity;GO:0032555//purine ribonucleotide binding;GO:0097159//organic cyclic compound binding;GO:0035639//purine ribonucleoside triphosphate binding;GO:0005488//binding;GO:0001882//nucleoside binding;GO:0004672//protein kinase activity;GO:0032553//ribonucleo…	GO:0044238//primary metabolic process;GO:0009987//cellular process;GO:0008152//metabolic process;GO:0006468//protein phosphorylation;GO:0044260//cellular macromolecule metabolic process;GO:0043412//macromolecule modification;GO:0006793//phosphorus metabolic process;GO:0043170//macromolecule metabolic process;GO:0016310//phosphorylation;GO:0044237//cellular metabolic process;GO:0036211//protein mo…
BnaA01g01940D	4.33333	0.333333	0.31	0.0233333	3.33333	1.66667	0.263333	0.123333	-3.7318	0.0358578	-1.09433	0.596688	BnaA01g01940D [Brassica napus]	-	-	-	-	-	-	-
BnaA01g01950D	44.14	22.5267	1.79667	0.833333	30.4567	26.61	1.37333	1.12	-1.10836	0.0050304	-0.294183	0.6592	BnaA01g01950D [Brassica napus]	-	-	-	-	-	GO:0005524//ATP binding;GO:0004672//protein kinase activity;GO:0032559//adenyl ribonucleotide binding;GO:0043167//ion binding;GO:0000166//nucleotide binding;GO:0043168//anion binding;GO:0097159//organic cyclic compound binding;GO:0030554//adenyl nucleotide binding;GO:0016301//kinase activity;GO:1901265//nucleoside phosphate binding;GO:0032549//ribonucleoside binding;GO:0003824//catalytic activity…	GO:0044238//primary metabolic process;GO:0043412//macromolecule modification;GO:0019538//protein metabolic process;GO:0006796//phosphate-containing compound metabolic process;GO:0006793//phosphorus metabolic process;GO:0016310//phosphorylation;GO:0071704//organic substance metabolic process;GO:0006464//cellular protein modification process;GO:0006468//protein phosphorylation;GO:0044267//cellular …
BnaA01g01960D	39.1133	12.3333	3.33667	0.956667	16.9633	13.6667	1.59333	1.19333	-1.80232	0.000109501	-0.417051	0.6432	PREDICTED: probable E3 ubiquitin-protein ligase ATL45 [Brassica rapa]	-	-	-	-	-	GO:0008270//zinc ion binding;GO:0046872//metal ion binding;GO:0043169//cation binding;GO:0043167//ion binding;GO:0005515//protein binding;GO:0046914//transition metal ion binding;GO:0005488//binding	GO:0006812//cation transport;GO:0008152//metabolic process;GO:0010033//response to organic substance;GO:0006810//transport;GO:0010243//response to organonitrogen compound;GO:0009628//response to abiotic stimulus;GO:1900673//olefin metabolic process;GO:0051179//localization;GO:1901698//response to nitrogen compound;GO:0071704//organic substance metabolic process;GO:0044237//cellular metabolic proc…
BnaA01g01990D	108.08	203.813	2.46333	4.23	52.3767	165.57	1.34	3.77667	0.780046	0.00304247	1.49488	4.2272e-05	BnaA01g01990D [Brassica napus]	-	-	-	-	GO:0016020//membrane	GO:0015103//inorganic anion transmembrane transporter activity;GO:0022838//substrate-specific channel activity;GO:0005215//transporter activity;GO:0022892//substrate-specific transporter activity;GO:0005216//ion channel activity;GO:0005515//protein binding;GO:0008509//anion transmembrane transporter activity;GO:0022836//gated channel activity;GO:0005253//anion channel activity;GO:0022891//substra…	GO:0006811//ion transport;GO:0015698//inorganic anion transport;GO:0006820//anion transport;GO:0006810//transport;GO:0051234//establishment of localization;GO:0006821//chloride transport;GO:0055085//transmembrane transport;GO:0051179//localization;GO:0044765//single-organism transport;GO:0009987//cellular process;GO:0044763//single-organism cellular process;GO:0044699//single-organism process;GO:…
BnaA01g02020D	20.95	8.33333	1.27333	0.473333	4.34667	0.333333	0.3	0.02	-1.42768	0.0130878	-3.90689	0.0191032	BnaA01g02020D [Brassica napus]	-	-	-	-	GO:0044464//cell part;GO:0030118//clathrin coat;GO:0005737//cytoplasm;GO:0016020//membrane;GO:0044444//cytoplasmic part;GO:0043234//protein complex;GO:0048475//coated membrane;GO:0032991//macromolecular complex;GO:0005623//cell;GO:0044424//intracellular part;GO:0030117//membrane coat;GO:0098796//membrane protein complex;GO:0044425//membrane part;GO:0005622//intracellular	GO:0005215//transporter activity;GO:0022892//substrate-specific transporter activity;GO:0008565//protein transporter activity	GO:1901360//organic cyclic compound metabolic process;GO:0071702//organic substance transport;GO:0070727//cellular macromolecule localization;GO:0044237//cellular metabolic process;GO:0051273//beta-glucan metabolic process;GO:0051641//cellular localization;GO:0006281//DNA repair;GO:0033554//cellular response to stress;GO:0008152//metabolic process;GO:0034613//cellular protein localization;GO:0050…
BnaA01g02040D	19.44	153.683	0.223333	1.56667	42.1433	90.4467	0.52	1.06333	2.81043	2.43e-15	1.03201	0.0244106	BnaA01g02040D [Brassica napus]	Cellular Processes	Transport and catabolism	ko04144//Endocytosis	K18442	-	GO:0005085//guanyl-nucleotide exchange factor activity;GO:0005086//ARF guanyl-nucleotide exchange factor activity;GO:0098772//molecular function regulator;GO:0005488//binding	GO:0009966//regulation of signal transduction;GO:0048583//regulation of response to stimulus;GO:0051056//regulation of small GTPase mediated signal transduction;GO:0050794//regulation of cellular process;GO:0050789//regulation of biological process;GO:0032012//regulation of ARF protein signal transduction;GO:1902531//regulation of intracellular signal transduction;GO:0010646//regulation of cell c…
BnaA01g02070D	37.3333	7.8	2.03667	0.386667	17.9967	4	1.07667	0.206667	-2.39705	1.23e-05	-2.38119	0.00224863	BnaA01g02070D [Brassica napus]	-	-	-	-	GO:0044431//Golgi apparatus part;GO:0043227//membrane-bounded organelle;GO:0043231//intracellular membrane-bounded organelle;GO:0016021//integral component of membrane;GO:0005737//cytoplasm;GO:0044425//membrane part;GO:0005623//cell;GO:0005794//Golgi apparatus;GO:0031224//intrinsic component of membrane;GO:0043226//organelle;GO:0000139//Golgi membrane;GO:0044422//organelle part;GO:0044424//intrac…	GO:0015605//organophosphate ester transmembrane transporter activity;GO:0022891//substrate-specific transmembrane transporter activity;GO:1901476//carbohydrate transporter activity;GO:0015932//nucleobase-containing compound transmembrane transporter activity;GO:0005215//transporter activity;GO:0005338//nucleotide-sugar transmembrane transporter activity;GO:0008324//cation transmembrane transporte…	GO:0019318//hexose metabolic process;GO:0044723//single-organism carbohydrate metabolic process;GO:0044699//single-organism process;GO:0051234//establishment of localization;GO:0015931//nucleobase-containing compound transport;GO:0015780//nucleotide-sugar transport;GO:0006862//nucleotide transport;GO:0051179//localization;GO:0008152//metabolic process;GO:1902578//single-organism localization;GO:0…
BnaA01g02080D	55.2467	222.877	7.43333	27.3033	22.6667	86	3.33667	11.6133	1.877	4.36e-07	1.7993	4.83179e-05	AT4g35320/F23E12_120 [Arabidopsis thaliana]	-	-	-	-	GO:0043227//membrane-bounded organelle;GO:0044424//intracellular part;GO:0005623//cell;GO:0005622//intracellular;GO:0043229//intracellular organelle;GO:0043231//intracellular membrane-bounded organelle;GO:0043226//organelle;GO:0044464//cell part	-	GO:0071840//cellular component organization or biogenesis;GO:0044085//cellular component biogenesis
BnaA01g02110D	90.6367	23.14	6.22667	1.45	50.9867	15.42	3.89	1.06	-2.10241	5.91e-10	-1.87571	3.48866e-05	BnaA01g02110D [Brassica napus]	-	-	-	-	GO:0005623//cell;GO:0016020//membrane;GO:0044464//cell part;GO:0030313//cell envelope;GO:0030288//outer membrane-bounded periplasmic space;GO:0031975//envelope;GO:0042597//periplasmic space	GO:0004970//ionotropic glutamate receptor activity;GO:0022892//substrate-specific transporter activity;GO:0015267//channel activity;GO:0015276//ligand-gated ion channel activity;GO:0022836//gated channel activity;GO:0022838//substrate-specific channel activity;GO:0005230//extracellular ligand-gated ion channel activity;GO:0060089//molecular transducer activity;GO:0005231//excitatory extracellular…	GO:0051179//localization;GO:0006810//transport;GO:0051234//establishment of localization
BnaA01g02120D	220.057	44.7633	7.17333	1.34	112.317	26.96	4.11	0.87	-2.42041	2.62e-16	-2.24005	5.88327e-08	BnaA01g02120D [Brassica napus]	-	-	-	-	-	-	-
BnaA01g02150D	305.117	32.6833	5.76667	0.553333	216.687	41	4.54	0.803333	-3.38152	3.88e-34	-2.49862	1.15366e-14	BnaA01g02150D [Brassica napus]	-	-	-	-	-	GO:0005488//binding;GO:0005515//protein binding	-
BnaA01g02220D	242.497	71.3333	13.55	3.74	155.333	52.3333	9.67333	2.94	-1.85718	2.01e-08	-1.7182	1.94697e-06	PREDICTED: rac-like GTP-binding protein ARAC3 [Brassica rapa]	Cellular Processes	Transport and catabolism	ko04145//Phagosome	K04392	GO:0044424//intracellular part;GO:0005634//nucleus;GO:0005856//cytoskeleton;GO:0005622//intracellular;GO:0043228//non-membrane-bounded organelle;GO:0044422//organelle part;GO:0043227//membrane-bounded organelle;GO:0005623//cell;GO:0016020//membrane;GO:0031974//membrane-enclosed lumen;GO:0044428//nuclear part;GO:0070013//intracellular organelle lumen;GO:0044446//intracellular organelle part;GO:004…	GO:0003824//catalytic activity;GO:0032550//purine ribonucleoside binding;GO:0019001//guanyl nucleotide binding;GO:0097159//organic cyclic compound binding;GO:0043167//ion binding;GO:0016818//hydrolase activity, acting on acid anhydrides, in phosphorus-containing anhydrides;GO:0017076//purine nucleotide binding;GO:0001883//purine nucleoside binding;GO:0043168//anion binding;GO:0016787//hydrolase a…	GO:0000902//cell morphogenesis;GO:0030036//actin cytoskeleton organization;GO:0016053//organic acid biosynthetic process;GO:0044238//primary metabolic process;GO:0065007//biological regulation;GO:0044763//single-organism cellular process;GO:0044700//single organism signaling;GO:0034641//cellular nitrogen compound metabolic process;GO:0048869//cellular developmental process;GO:0008152//metabolic p…
BnaA01g02240D	137.073	64.7167	8.99667	3.86667	108.977	124.387	7.96667	8.55667	-1.2183	0.000432352	0.103073	0.889825	BnaA01g02240D [Brassica napus]	-	-	-	-	GO:0005623//cell;GO:0043227//membrane-bounded organelle;GO:0044424//intracellular part;GO:0044464//cell part;GO:0005622//intracellular;GO:0043226//organelle;GO:0043231//intracellular membrane-bounded organelle;GO:0043229//intracellular organelle	GO:1901363//heterocyclic compound binding;GO:0001071//nucleic acid binding transcription factor activity;GO:0044877//macromolecular complex binding;GO:0005488//binding;GO:0003682//chromatin binding;GO:0003676//nucleic acid binding;GO:0003677//DNA binding;GO:0097159//organic cyclic compound binding	GO:0016070//RNA metabolic process;GO:0007154//cell communication;GO:0050896//response to stimulus;GO:0043170//macromolecule metabolic process;GO:1901576//organic substance biosynthetic process;GO:0009725//response to hormone;GO:0097659//nucleic acid-templated transcription;GO:0050789//regulation of biological process;GO:0065007//biological regulation;GO:0044699//single-organism process;GO:0009059…
BnaA01g02250D	0	4.18667	0.001	0.296667	0	10.3167	0.001	0.826667	8.2127	0.00763665	9.69116	1.02297e-05	BnaA01g02250D [Brassica napus]	-	-	-	-	GO:0044424//intracellular part;GO:0015629//actin cytoskeleton;GO:0043228//non-membrane-bounded organelle;GO:0005623//cell;GO:0005856//cytoskeleton;GO:0005622//intracellular;GO:0044464//cell part;GO:0043229//intracellular organelle;GO:0043226//organelle;GO:0043232//intracellular non-membrane-bounded organelle	GO:0003779//actin binding;GO:0005488//binding;GO:0005515//protein binding;GO:0008092//cytoskeletal protein binding	GO:0043241//protein complex disassembly;GO:0030042//actin filament depolymerization;GO:0051261//protein depolymerization;GO:0030029//actin filament-based process;GO:0032984//macromolecular complex disassembly;GO:0071840//cellular component organization or biogenesis;GO:0043624//cellular protein complex disassembly;GO:0006996//organelle organization;GO:0071822//protein complex subunit organization…
BnaA01g02260D	154.73	65	8.11333	3.10667	163.05	71.2433	9.51667	3.83	-1.38493	4.13e-07	-1.31311	1.70723e-05	BnaA01g02260D [Brassica napus]	-	-	-	-	GO:0043227//membrane-bounded organelle;GO:0005622//intracellular;GO:0044424//intracellular part;GO:0044464//cell part;GO:0043229//intracellular organelle;GO:0043231//intracellular membrane-bounded organelle;GO:0043226//organelle;GO:0005623//cell	GO:0003755//peptidyl-prolyl cis-trans isomerase activity;GO:0003824//catalytic activity;GO:0016853//isomerase activity;GO:0016859//cis-trans isomerase activity	GO:0044237//cellular metabolic process;GO:0006457//protein folding;GO:0008152//metabolic process;GO:0071704//organic substance metabolic process;GO:0044260//cellular macromolecule metabolic process;GO:0009987//cellular process;GO:0019538//protein metabolic process;GO:0043170//macromolecule metabolic process;GO:0044267//cellular protein metabolic process;GO:0044238//primary metabolic process
BnaA01g02270D	1317.96	220.373	45.5933	6.97667	827.58	215.28	31.6033	7.54667	-2.70821	9.95e-30	-2.06617	5.8311e-14	PREDICTED: protein NUCLEAR FUSION DEFECTIVE 4 [Brassica rapa]	-	-	-	-	-	-	GO:0008152//metabolic process;GO:0044710//single-organism metabolic process;GO:1901135//carbohydrate derivative metabolic process;GO:0044249//cellular biosynthetic process;GO:0009987//cellular process;GO:0006082//organic acid metabolic process;GO:1901657//glycosyl compound metabolic process;GO:0044699//single-organism process;GO:0071704//organic substance metabolic process;GO:0048511//rhythmic pr…
BnaA01g02370D	655.59	246.71	10.1933	3.53667	619.373	187.87	10.7133	2.98	-1.52716	6.62e-09	-1.84602	2.17039e-10	BnaA01g02370D [Brassica napus]	-	-	-	-	-	GO:0005515//protein binding;GO:0005488//binding	-
BnaA01g02410D	2.33333	0	0.21	0.001	5.33333	0	0.536667	0.001	-7.71425	0.0631312	-9.06788	0.00370037	BnaA01g02410D [Brassica napus]	Environmental Information Processing	Signal transduction	ko04075//Plant hormone signal transduction	K14488	-	-	GO:0042221//response to chemical;GO:0009725//response to hormone;GO:0050896//response to stimulus;GO:0009719//response to endogenous stimulus;GO:0010033//response to organic substance
BnaA01g02420D	8.66667	2.66667	0.806667	0.23	8.33333	1.35333	0.853333	0.116667	-1.81034	0.110032	-2.87072	0.0358932	PREDICTED: auxin-induced protein 15A-like [Brassica napus]	Environmental Information Processing	Signal transduction	ko04075//Plant hormone signal transduction	K14488	GO:0043227//membrane-bounded organelle;GO:0005622//intracellular;GO:0043229//intracellular organelle;GO:0005623//cell;GO:0044464//cell part;GO:0043226//organelle;GO:0043231//intracellular membrane-bounded organelle;GO:0044424//intracellular part	-	GO:0042221//response to chemical;GO:0009719//response to endogenous stimulus;GO:0009725//response to hormone;GO:0010033//response to organic substance;GO:0050896//response to stimulus
BnaA01g02440D	437.07	1279.53	8.86667	23.6533	245.047	787.693	5.49333	16.35	1.41558	1.26e-08	1.57354	2.12326e-08	BnaA01g02440D [Brassica napus]	Metabolism	Nucleotide metabolism;Global and Overview;Amino acid metabolism	ko01100//Metabolic pathways;ko01110//Biosynthesis of secondary metabolites;ko01130//Biosynthesis of antibiotics;ko00230//Purine metabolism;ko00250//Alanine, aspartate and glutamate metabolism	K00764	GO:0043226//organelle;GO:0043229//intracellular organelle;GO:0044424//intracellular part;GO:0005623//cell;GO:0043227//membrane-bounded organelle;GO:0044464//cell part;GO:0043231//intracellular membrane-bounded organelle;GO:0005622//intracellular;GO:0009536//plastid;GO:0044444//cytoplasmic part;GO:0005737//cytoplasm;GO:0009532//plastid stroma;GO:0044435//plastid part;GO:0044446//intracellular orga…	GO:0004044//amidophosphoribosyltransferase activity;GO:0016757//transferase activity, transferring glycosyl groups;GO:0003824//catalytic activity;GO:0016763//transferase activity, transferring pentosyl groups;GO:0016740//transferase activity	GO:0006796//phosphate-containing compound metabolic process;GO:0072522//purine-containing compound biosynthetic process;GO:0044281//small molecule metabolic process;GO:0071840//cellular component organization or biogenesis;GO:0048513//animal organ development;GO:0009887//organ morphogenesis;GO:0022613//ribonucleoprotein complex biogenesis;GO:0009117//nucleotide metabolic process;GO:0009653//anato…
BnaA01g02460D	32.77	15	0.943333	0.403333	242.707	6.33333	7.86	0.196667	-1.2258	0.131047	-5.3207	2.25445e-27	BnaA01g02460D [Brassica napus]	Metabolism	Global and Overview;Amino acid metabolism	ko01100//Metabolic pathways;ko00330//Arginine and proline metabolism	K01583	-	GO:0003824//catalytic activity;GO:0008792//arginine decarboxylase activity;GO:0016831//carboxy-lyase activity;GO:0016829//lyase activity;GO:0016830//carbon-carbon lyase activity	GO:0006525//arginine metabolic process;GO:0009791//post-embryonic development;GO:0065007//biological regulation;GO:0032787//monocarboxylic acid metabolic process;GO:0006596//polyamine biosynthetic process;GO:0023052//signaling;GO:0009308//amine metabolic process;GO:0071310//cellular response to organic substance;GO:0008216//spermidine metabolic process;GO:0009056//catabolic process;GO:1901606//al…
BnaA01g02470D	188.55	93.5333	16.9267	7.59	126.333	67.3333	12.6267	5.96333	-1.15713	2.35e-05	-1.08228	0.0129572	BnaA01g02470D [Brassica napus]	Metabolism	Global and Overview;Energy metabolism	ko01100//Metabolic pathways;ko00190//Oxidative phosphorylation	K03965	-	-	-
BnaA01g02510D	2.33333	1244.74	0.0966667	49.8167	3.33333	390.667	0.166667	18.0067	9.00939	9.07e-111	6.75542	3.00046e-40	BnaA01g02510D [Brassica napus]	Metabolism	Metabolism of terpenoids and polyketides;Lipid metabolism;Global and Overview	ko01100//Metabolic pathways;ko01110//Biosynthesis of secondary metabolites;ko01130//Biosynthesis of antibiotics;ko00100//Steroid biosynthesis;ko00909//Sesquiterpenoid and triterpenoid biosynthesis	K00801	GO:0031224//intrinsic component of membrane;GO:0044425//membrane part;GO:0016021//integral component of membrane;GO:0016020//membrane	GO:0003824//catalytic activity;GO:0004310//farnesyl-diphosphate farnesyltransferase activity;GO:0004659//prenyltransferase activity;GO:0016740//transferase activity;GO:0016765//transferase activity, transferring alkyl or aryl (other than methyl) groups;GO:0004311//farnesyltranstransferase activity	GO:1901576//organic substance biosynthetic process;GO:0009058//biosynthetic process;GO:0044711//single-organism biosynthetic process;GO:0008152//metabolic process;GO:0071704//organic substance metabolic process;GO:0044710//single-organism metabolic process;GO:0006629//lipid metabolic process;GO:0044699//single-organism process;GO:0044238//primary metabolic process;GO:0008610//lipid biosynthetic p…
BnaA01g02530D	54.6667	90	3	4.51333	15.3333	41.3333	0.94	2.31	0.589231	0.122351	1.29716	0.00643782	BnaA01g02530D [Brassica napus]	-	-	-	-	-	-	-
BnaA01g02540D	253.18	194.793	20.6467	14.5167	383.853	78.95	34.7567	6.56333	-0.508199	0.0770617	-2.40479	1.1703e-17	BnaA01g02540D [Brassica napus]	Genetic Information Processing	Translation	ko03010//Ribosome	K02959	GO:0044435//plastid part;GO:0043231//intracellular membrane-bounded organelle;GO:0032991//macromolecular complex;GO:0030529//intracellular ribonucleoprotein complex;GO:0005737//cytoplasm;GO:0031975//envelope;GO:0031967//organelle envelope;GO:0005623//cell;GO:0043226//organelle;GO:0009526//plastid envelope;GO:0043227//membrane-bounded organelle;GO:0044422//organelle part;GO:0005840//ribosome;GO:00…	GO:0003735//structural constituent of ribosome;GO:0005198//structural molecule activity	GO:0009058//biosynthetic process;GO:0022613//ribonucleoprotein complex biogenesis;GO:0010558//negative regulation of macromolecule biosynthetic process;GO:0006807//nitrogen compound metabolic process;GO:0010556//regulation of macromolecule biosynthetic process;GO:0040029//regulation of gene expression, epigenetic;GO:0006412//translation;GO:0060255//regulation of macromolecule metabolic process;GO…
BnaA01g02570D	75.5567	28	9.21667	3.11667	104	35.3333	14.2367	4.45667	-1.56424	5.75e-06	-1.67557	1.17786e-05	PREDICTED: bZIP transcription factor 11-like [Brassica rapa]	-	-	-	-	-	GO:0097159//organic cyclic compound binding;GO:0043565//sequence-specific DNA binding;GO:0003700//transcription factor activity, sequence-specific DNA binding;GO:1901363//heterocyclic compound binding;GO:0005488//binding;GO:0001071//nucleic acid binding transcription factor activity;GO:0003677//DNA binding;GO:0003676//nucleic acid binding	-
BnaA01g02590D	83.9267	46.15	2.31667	1.15333	46.2867	28.1467	1.39	0.753333	-1.00624	0.00301866	-0.883725	0.140458	BnaA01g02590D [Brassica napus]	Metabolism	Metabolism of cofactors and vitamins;Global and Overview;Nucleotide metabolism	ko01100//Metabolic pathways;ko00240//Pyrimidine metabolism;ko00670//One carbon pool by folate;ko00790//Folate biosynthesis	K13998	-	GO:0008168//methyltransferase activity;GO:0016646//oxidoreductase activity, acting on the CH-NH group of donors, NAD or NADP as acceptor;GO:0003824//catalytic activity;GO:0004799//thymidylate synthase activity;GO:0016491//oxidoreductase activity;GO:0016740//transferase activity;GO:0016645//oxidoreductase activity, acting on the CH-NH group of donors;GO:0004146//dihydrofolate reductase activity;GO…	GO:0009117//nucleotide metabolic process;GO:0006082//organic acid metabolic process;GO:1901135//carbohydrate derivative metabolic process;GO:0044238//primary metabolic process;GO:0044249//cellular biosynthetic process;GO:0009177//pyrimidine deoxyribonucleoside monophosphate biosynthetic process;GO:0009262//deoxyribonucleotide metabolic process;GO:1901576//organic substance biosynthetic process;GO…
BnaA01g02600D	250.217	13	16.5467	0.776667	103.317	27	7.62333	1.79333	-4.4131	4.19e-38	-2.08778	6.90627e-07	transmembrane protein [Arabidopsis thaliana]	-	-	-	-	-	-	-
BnaA01g02610D	32.7267	7	1.79333	0.366667	66	7	4.02667	0.383333	-2.2901	9.57e-05	-3.39291	6.10852e-12	BnaA01g02610D [Brassica napus]	-	-	-	-	-	GO:0036094//small molecule binding;GO:0005488//binding;GO:0000166//nucleotide binding;GO:0016628//oxidoreductase activity, acting on the CH-CH group of donors, NAD or NADP as acceptor;GO:0016627//oxidoreductase activity, acting on the CH-CH group of donors;GO:0003824//catalytic activity;GO:1901265//nucleoside phosphate binding;GO:0016491//oxidoreductase activity;GO:1901363//heterocyclic compound …	-
BnaA01g02620D	221.513	35.6667	9.08	1.32667	248.627	24.3867	11.46	1.03667	-2.77489	1.68e-17	-3.46658	1.3929e-27	BnaA01g02620D [Brassica napus]	-	-	-	-	-	GO:0046983//protein dimerization activity;GO:0005515//protein binding;GO:0005488//binding	-
BnaA01g02630D	60.55	11.3333	2.21333	0.38	62.0367	21.7033	2.48667	0.786667	-2.54215	1.54e-07	-1.66039	0.000811548	PREDICTED: probable receptor-like serine/threonine-protein kinase At4g34500 [Brassica napus]	-	-	-	-	-	GO:0032549//ribonucleoside binding;GO:0005488//binding;GO:0036094//small molecule binding;GO:0004713//protein tyrosine kinase activity;GO:1901265//nucleoside phosphate binding;GO:0003824//catalytic activity;GO:0043167//ion binding;GO:0097159//organic cyclic compound binding;GO:1901363//heterocyclic compound binding;GO:0016740//transferase activity;GO:0035639//purine ribonucleoside triphosphate bi…	GO:0009987//cellular process;GO:0043170//macromolecule metabolic process;GO:0044237//cellular metabolic process;GO:0006468//protein phosphorylation;GO:0008152//metabolic process;GO:0044267//cellular protein metabolic process;GO:0044238//primary metabolic process;GO:0006464//cellular protein modification process;GO:0044260//cellular macromolecule metabolic process;GO:0043412//macromolecule modific…
BnaA01g02640D	512.833	201.223	16.41	5.87	591.607	229.623	21.0033	7.56333	-1.48314	6.46e-10	-1.47352	2.80125e-07	BnaA01g02640D [Brassica napus]	-	-	-	-	GO:0044424//intracellular part;GO:0005622//intracellular;GO:0044444//cytoplasmic part;GO:0005623//cell;GO:0044464//cell part;GO:0005737//cytoplasm	GO:0005515//protein binding;GO:0003779//actin binding;GO:0005488//binding;GO:0008092//cytoskeletal protein binding	GO:0043473//pigmentation;GO:0016049//cell growth;GO:0071704//organic substance metabolic process;GO:0044710//single-organism metabolic process;GO:0065007//biological regulation;GO:0009314//response to radiation;GO:0045229//external encapsulating structure organization;GO:0065008//regulation of biological quality;GO:0044699//single-organism process;GO:0007010//cytoskeleton organization;GO:0000902/…
BnaA01g02650D	616.46	143.833	19.6067	4.2	1048.07	64.8967	36.8767	2.09333	-2.22288	1.13e-14	-4.13883	6.92381e-45	PREDICTED: glucan endo-1,3-beta-glucosidase 7 [Brassica napus]	-	-	-	-	-	GO:0003824//catalytic activity	GO:0044238//primary metabolic process;GO:0005975//carbohydrate metabolic process;GO:0008152//metabolic process;GO:0071704//organic substance metabolic process
BnaA01g02700D	3	0	0.16	0.001	0.666667	0	0.0433333	0.001	-7.32193	0.0278325	-5.43741	0.688792	BnaA01g02700D [Brassica napus]	-	-	-	-	-	GO:0016740//transferase activity;GO:0003824//catalytic activity;GO:0016782//transferase activity, transferring sulfur-containing groups;GO:0008146//sulfotransferase activity	-
BnaA01g02710D	17.6667	9	0.8	0.36	17.3333	6	0.863333	0.283333	-1.152	0.0520324	-1.60742	0.0164454	BnaA01g02710D [Brassica napus]	-	-	-	-	-	-	-
BnaA01g02720D	326.667	146.563	23.27	10.0233	736.623	15	59.5233	1.17333	-1.21511	0.297764	-5.66477	2.97125e-41	BnaA01g02720D [Brassica napus]	-	-	-	-	-	GO:0003676//nucleic acid binding;GO:0097159//organic cyclic compound binding;GO:0003700//transcription factor activity, sequence-specific DNA binding;GO:0001071//nucleic acid binding transcription factor activity;GO:0005488//binding;GO:0003677//DNA binding;GO:1901363//heterocyclic compound binding	-
BnaA01g02780D	342.667	680.443	11.5467	20.9667	256.333	579.333	9.54667	20.25	0.860621	0.00021705	1.08485	0.000101902	BnaA01g02780D [Brassica napus]	Metabolism	Metabolism of terpenoids and polyketides;Global and Overview	ko01100//Metabolic pathways;ko01110//Biosynthesis of secondary metabolites;ko01130//Biosynthesis of antibiotics;ko00900//Terpenoid backbone biosynthesis	K03527	GO:0005622//intracellular;GO:0009536//plastid;GO:0005737//cytoplasm;GO:0009532//plastid stroma;GO:0043226//organelle;GO:0044424//intracellular part;GO:0044435//plastid part;GO:0044446//intracellular organelle part;GO:0044422//organelle part;GO:0005623//cell;GO:0043231//intracellular membrane-bounded organelle;GO:0044464//cell part;GO:0044444//cytoplasmic part;GO:0043229//intracellular organelle;G…	GO:0016726//oxidoreductase activity, acting on CH or CH2 groups, NAD or NADP as acceptor;GO:0016725//oxidoreductase activity, acting on CH or CH2 groups;GO:0052592//oxidoreductase activity, acting on CH or CH2 groups, with an iron-sulfur protein as acceptor;GO:0016491//oxidoreductase activity;GO:0003824//catalytic activity	GO:0044237//cellular metabolic process;GO:0044699//single-organism process;GO:0019752//carboxylic acid metabolic process;GO:0055114//oxidation-reduction process;GO:0032787//monocarboxylic acid metabolic process;GO:0044281//small molecule metabolic process;GO:0050896//response to stimulus;GO:0009636//response to toxic substance;GO:0071704//organic substance metabolic process;GO:0006082//organic ac…
BnaA01g02810D	313.333	191.667	24.0433	13.3833	383	201.667	32.46	15.4833	-0.845199	0.000709183	-1.06795	0.000197911	SWIB/MDM2 domain superfamily protein [Brassica napus]	-	-	-	-	GO:0043231//intracellular membrane-bounded organelle;GO:0005622//intracellular;GO:0043229//intracellular organelle;GO:0005623//cell;GO:0043227//membrane-bounded organelle;GO:0044424//intracellular part;GO:0043226//organelle;GO:0044464//cell part	GO:0005515//protein binding;GO:0005488//binding	-
BnaA01g02870D	19.7067	1	0.803333	0.04	7	1	0.323333	0.0433333	-4.32793	1.03e-07	-2.89947	0.0230515	BnaA01g02870D [Brassica napus]	Metabolism	Lipid metabolism;Global and Overview	ko01110//Biosynthesis of secondary metabolites;ko00062//Fatty acid elongation	K15397	GO:0016020//membrane	GO:0003824//catalytic activity	GO:0009628//response to abiotic stimulus;GO:0050896//response to stimulus;GO:0019752//carboxylic acid metabolic process;GO:0006633//fatty acid biosynthetic process;GO:0043436//oxoacid metabolic process;GO:0006629//lipid metabolic process;GO:0044711//single-organism biosynthetic process;GO:0044763//single-organism cellular process;GO:0032787//monocarboxylic acid metabolic process;GO:1901576//organ…
BnaA01g02880D	313.497	2406.48	9.74	68.2133	256.54	926.763	8.83	29.9933	2.80806	3.27e-26	1.76416	3.5664e-08	BnaA01g02880D [Brassica napus]	Metabolism	Metabolism of terpenoids and polyketides;Carbohydrate metabolism;Amino acid metabolism;Lipid metabolism;Global and Overview;Metabolism of other amino acids	ko01100//Metabolic pathways;ko01110//Biosynthesis of secondary metabolites;ko01130//Biosynthesis of antibiotics;ko01120//Microbial metabolism in diverse environments;ko00010//Glycolysis / Gluconeogenesis;ko00040//Pentose and glucuronate interconversions;ko00620//Pyruvate metabolism;ko00330//Arginine and proline metabolism;ko00561//Glycerolipid metabolism;ko00903//Limonene and pinene degradation;k…	K00128	-	GO:0003824//catalytic activity;GO:0004030//aldehyde dehydrogenase [NAD(P)+] activity;GO:0016620//oxidoreductase activity, acting on the aldehyde or oxo group of donors, NAD or NADP as acceptor;GO:0016491//oxidoreductase activity;GO:0016903//oxidoreductase activity, acting on the aldehyde or oxo group of donors	GO:0044763//single-organism cellular process;GO:0044699//single-organism process;GO:0044710//single-organism metabolic process;GO:0044237//cellular metabolic process;GO:0009987//cellular process;GO:0055114//oxidation-reduction process;GO:0006081//cellular aldehyde metabolic process;GO:0008152//metabolic process;GO:0071704//organic substance metabolic process
BnaA01g02910D	61.61	29.51	1.47333	0.636667	59.63	23.5467	1.54	0.543333	-1.21047	0.0266424	-1.50302	0.0151887	leucine-rich repeat protein kinase family protein [Brassica napus]	-	-	-	-	-	GO:0016740//transferase activity;GO:0032555//purine ribonucleotide binding;GO:0032549//ribonucleoside binding;GO:0032559//adenyl ribonucleotide binding;GO:0016773//phosphotransferase activity, alcohol group as acceptor;GO:0003824//catalytic activity;GO:0000166//nucleotide binding;GO:0030554//adenyl nucleotide binding;GO:0097367//carbohydrate derivative binding;GO:0036094//small molecule binding;G…	GO:0044238//primary metabolic process;GO:0044699//single-organism process;GO:0036211//protein modification process;GO:0050794//regulation of cellular process;GO:0006793//phosphorus metabolic process;GO:0006468//protein phosphorylation;GO:0007166//cell surface receptor signaling pathway;GO:0044237//cellular metabolic process;GO:0009987//cellular process;GO:0043170//macromolecule metabolic process;…
BnaA01g02920D	78.9833	23.7933	2.75333	0.766667	67.15	32.3333	2.62667	1.14333	-1.84451	1.74e-07	-1.19999	0.00471035	BnaA01g02920D [Brassica napus]	-	-	-	-	-	GO:0003824//catalytic activity	-
BnaA01g02930D	33.4433	15.1	1.06	0.45	30	32.7533	1.04333	1	-1.23607	0.013012	-0.0612002	1	PREDICTED: D-3-phosphoglycerate dehydrogenase 1, chloroplastic [Brassica napus]	Metabolism	Amino acid metabolism;Global and Overview	ko01100//Metabolic pathways;ko01130//Biosynthesis of antibiotics;ko01120//Microbial metabolism in diverse environments;ko01200//Carbon metabolism;ko01230//Biosynthesis of amino acids;ko00260//Glycine, serine and threonine metabolism	K00058	GO:0009532//plastid stroma;GO:0043226//organelle;GO:0005623//cell;GO:0043227//membrane-bounded organelle;GO:0044424//intracellular part;GO:0044444//cytoplasmic part;GO:0044435//plastid part;GO:0044422//organelle part;GO:0043229//intracellular organelle;GO:0044464//cell part;GO:0005622//intracellular;GO:0043231//intracellular membrane-bounded organelle;GO:0009536//plastid;GO:0005737//cytoplasm;GO:…	GO:0016614//oxidoreductase activity, acting on CH-OH group of donors;GO:0097159//organic cyclic compound binding;GO:0000166//nucleotide binding;GO:0036094//small molecule binding;GO:0001882//nucleoside binding;GO:0043177//organic acid binding;GO:0043168//anion binding;GO:0032549//ribonucleoside binding;GO:0001883//purine nucleoside binding;GO:1901363//heterocyclic compound binding;GO:0016491//oxi…	GO:0044710//single-organism metabolic process;GO:0043436//oxoacid metabolic process;GO:0044767//single-organism developmental process;GO:0044763//single-organism cellular process;GO:0044707//single-multicellular organism process;GO:0009069//serine family amino acid metabolic process;GO:0006520//cellular amino acid metabolic process;GO:0044711//single-organism biosynthetic process;GO:0009070//seri…
BnaA01g02980D	237.207	202.16	12.33	9.57	350	162.42	20.0667	9.03667	-0.365582	0.430396	-1.15094	0.00478958	calcium-dependent lipid-binding (CaLB domain) family protein [Brassica napus]	-	-	-	-	-	GO:0005488//binding;GO:0005515//protein binding	-
BnaA01g02990D	65.3333	22	2.43333	0.733333	69.06	25.43	2.84667	0.96	-1.73039	5.59e-06	-1.56817	4.49151e-05	BnaA01g02990D [Brassica napus]	-	-	-	-	-	GO:0005488//binding;GO:0003676//nucleic acid binding;GO:0097159//organic cyclic compound binding;GO:1901363//heterocyclic compound binding	-
BnaA01g03020D	7.11	163.537	0.283333	5.75667	0.67	534.697	0.03	20.56	4.34466	1.35e-18	9.42066	4.91372e-28	UDP-glucosyl transferase 73B2 [Brassica napus]	-	-	-	-	-	GO:0016758//transferase activity, transferring hexosyl groups;GO:0016740//transferase activity;GO:0003824//catalytic activity;GO:0035251//UDP-glucosyltransferase activity;GO:0046527//glucosyltransferase activity;GO:0008194//UDP-glycosyltransferase activity;GO:0016757//transferase activity, transferring glycosyl groups	GO:0009607//response to biotic stimulus;GO:0043207//response to external biotic stimulus;GO:0050896//response to stimulus;GO:0009605//response to external stimulus;GO:0008152//metabolic process
BnaA01g03050D	997.543	537.76	24.3433	12.0667	1232.22	600.867	33.75	15.37	-1.0125	6.29e-05	-1.13477	3.52825e-05	BnaA01g03050D [Brassica napus]	Genetic Information Processing	Translation;Folding, sorting and degradation	ko03013//RNA transport;ko03015//mRNA surveillance pathway;ko03018//RNA degradation	K13126	-	GO:1901265//nucleoside phosphate binding;GO:0005488//binding;GO:1901363//heterocyclic compound binding;GO:0097159//organic cyclic compound binding;GO:0000166//nucleotide binding;GO:0036094//small molecule binding;GO:0003676//nucleic acid binding;GO:0003723//RNA binding	-
BnaA01g03060D	1102	2752.43	17.0267	38.5267	1077.06	1561.37	18.3733	24.7633	1.17806	1.4e-06	0.430592	0.145051	cleistogamy A [Brassica napus]	Genetic Information Processing	Folding, sorting and degradation	ko04141//Protein processing in endoplasmic reticulum	K10661	-	GO:0046914//transition metal ion binding;GO:0046872//metal ion binding;GO:0005488//binding;GO:0043169//cation binding;GO:0008270//zinc ion binding;GO:0043167//ion binding	-
BnaA01g03070D	134.8	28.6667	2.26333	0.43	110.36	42.0767	2.08333	0.73	-2.39604	3.03e-13	-1.51293	4.37637e-05	BnaA01g03070D [Brassica napus]	-	-	-	-	-	GO:0003824//catalytic activity	GO:0044763//single-organism cellular process;GO:0071704//organic substance metabolic process;GO:0006725//cellular aromatic compound metabolic process;GO:0044237//cellular metabolic process;GO:0033554//cellular response to stress;GO:0006259//DNA metabolic process;GO:0006139//nucleobase-containing compound metabolic process;GO:0044238//primary metabolic process;GO:0006974//cellular response to DNA …
BnaA01g03080D	34.3333	105.667	3.67	10.36	5.66667	25.6667	0.676667	2.8	1.49717	3.01e-06	2.04891	0.000393688	BnaA01g03080D [Brassica napus]	-	-	-	-	-	-	-
BnaA01g03120D	59.3933	12.1133	2.36333	0.44	49.8667	5.62	2.20667	0.226667	-2.42525	1.09e-08	-3.28322	4.40144e-09	ARM repeat superfamily protein [Brassica napus]	-	-	-	-	-	GO:0005515//protein binding;GO:0005488//binding	-
BnaA01g03130D	45.3333	72.8433	3.02333	4.45667	62.8767	26	4.70333	1.81667	0.559825	0.125121	-1.37239	0.000826999	RING/U-box superfamily protein [Brassica napus]	-	-	-	-	-	GO:0005515//protein binding;GO:0046914//transition metal ion binding;GO:0043169//cation binding;GO:0008270//zinc ion binding;GO:0046872//metal ion binding;GO:0005488//binding;GO:0043167//ion binding	GO:0044700//single organism signaling;GO:0044699//single-organism process;GO:0044763//single-organism cellular process;GO:0009725//response to hormone;GO:0051716//cellular response to stimulus;GO:0009719//response to endogenous stimulus;GO:0065007//biological regulation;GO:0000160//phosphorelay signal transduction system;GO:0009628//response to abiotic stimulus;GO:0007165//signal transduction;GO:…
BnaA01g03140D	5.33333	1	0.74	0.136667	7.33333	0.333333	1.15333	0.0433333	-2.43686	0.0537802	-4.73419	0.000788546	BnaA01g03140D [Brassica napus]	-	-	-	-	-	-	-
BnaA01g03150D	92.3333	60.9	11.3267	6.84667	114.333	47.6667	15.5967	6.07333	-0.72625	0.0742663	-1.36068	0.000107074	PREDICTED: 40S ribosomal protein S29-like [Brassica rapa]	Genetic Information Processing	Translation	ko03010//Ribosome	K02980	GO:0043226//organelle;GO:0005737//cytoplasm;GO:0005623//cell;GO:0043232//intracellular non-membrane-bounded organelle;GO:0044444//cytoplasmic part;GO:0043228//non-membrane-bounded organelle;GO:0030529//intracellular ribonucleoprotein complex;GO:0015935//small ribosomal subunit;GO:1990904//ribonucleoprotein complex;GO:0044424//intracellular part;GO:0032991//macromolecular complex;GO:0044391//ribos…	GO:0005198//structural molecule activity;GO:0003735//structural constituent of ribosome	GO:0009058//biosynthetic process;GO:1901564//organonitrogen compound metabolic process;GO:0034641//cellular nitrogen compound metabolic process;GO:0008152//metabolic process;GO:0009059//macromolecule biosynthetic process;GO:0044271//cellular nitrogen compound biosynthetic process;GO:0044237//cellular metabolic process;GO:0006518//peptide metabolic process;GO:0044267//cellular protein metabolic pr…
BnaA01g03170D	3.33333	0	0.15	0.001	0.666667	0.666667	0.0366667	0.03	-7.22882	0.040988	-0.289507	1	BnaA01g03170D [Brassica napus]	Metabolism	Biosynthesis of other secondary metabolites;Global and Overview	ko01100//Metabolic pathways;ko01110//Biosynthesis of secondary metabolites;ko00940//Phenylpropanoid biosynthesis	K00430	-	GO:0016491//oxidoreductase activity;GO:0004601//peroxidase activity;GO:0097159//organic cyclic compound binding;GO:1901363//heterocyclic compound binding;GO:0003824//catalytic activity;GO:0020037//heme binding;GO:0016684//oxidoreductase activity, acting on peroxide as acceptor;GO:0046906//tetrapyrrole binding;GO:0016209//antioxidant activity;GO:0005488//binding	GO:0006950//response to stress;GO:0006979//response to oxidative stress;GO:0044710//single-organism metabolic process;GO:0055114//oxidation-reduction process;GO:0044699//single-organism process;GO:0008152//metabolic process;GO:0050896//response to stimulus
BnaA01g03200D	4663.37	388.707	154.463	11.97	4211.69	744.2	153.253	24.23	-3.68977	1.09e-15	-2.66105	4.96206e-10	alcohol-forming fatty acyl-CoA reductase [Brassica napus]	Metabolism;Cellular Processes	Lipid metabolism;Transport and catabolism	ko04146//Peroxisome;ko00073//Cutin, suberine and wax biosynthesis	K13356	-	GO:1901363//heterocyclic compound binding;GO:0016903//oxidoreductase activity, acting on the aldehyde or oxo group of donors;GO:0036094//small molecule binding;GO:0000166//nucleotide binding;GO:0016491//oxidoreductase activity;GO:0016620//oxidoreductase activity, acting on the aldehyde or oxo group of donors, NAD or NADP as acceptor;GO:0080019//fatty-acyl-CoA reductase (alcohol-forming) activity;…	-
BnaA01g03210D	38.62	10	3.18	0.746667	18	8.66667	1.63333	0.746667	-2.09049	3.16e-05	-1.12928	0.121697	At4g33780-like protein [Brassica napus]	-	-	-	-	-	-	-
BnaA01g03240D	176.333	39.1967	4.06	0.83	270	38.6667	7.00333	0.96	-2.2903	2.17e-15	-2.86694	7.25602e-14	At4g33740-like protein [Brassica napus]	-	-	-	-	-	-	-
BnaA01g03300D	11.6667	4	1.64	0.516667	7.33333	29.3333	1.18333	4.2	-1.66639	0.0286717	1.82753	0.00216986	At4g33666-like protein [Brassica napus]	-	-	-	-	-	-	-
BnaA01g03310D	12.19	0.333333	1.37333	0.0333333	20	1.38667	2.48	0.153333	-5.36457	3.24e-05	-4.0156	1.07213e-06	At4g33660-like protein [Brassica napus]	-	-	-	-	-	-	-
BnaA01g03330D	209.333	92.6667	22.9767	9.25	190.1	121.333	23.1867	13.3767	-1.31264	3.17e-05	-0.793577	0.0272062	PREDICTED: costars family protein ST45-2 [Brassica rapa]	-	-	-	-	GO:0044424//intracellular part;GO:0044464//cell part;GO:0005623//cell;GO:0005622//intracellular	-	GO:0009987//cellular process;GO:0016043//cellular component organization;GO:0071840//cellular component organization or biogenesis;GO:0006996//organelle organization
BnaA01g03350D	54.3333	13	1.22333	0.273333	80	26	2.02333	0.603333	-2.16208	2.5e-07	-1.74571	5.88399e-06	BnaA01g03350D [Brassica napus]	-	-	-	-	-	GO:0016787//hydrolase activity;GO:0003824//catalytic activity;GO:0070011//peptidase activity, acting on L-amino acid peptides;GO:0008233//peptidase activity;GO:0008234//cysteine-type peptidase activity	GO:0044238//primary metabolic process;GO:0008152//metabolic process;GO:0019538//protein metabolic process;GO:0043170//macromolecule metabolic process;GO:0006508//proteolysis;GO:0071704//organic substance metabolic process
BnaA01g03370D	209.83	82.5367	7.23	2.59333	186.827	112.547	7.16	3.90667	-1.47919	3e-07	-0.874021	0.0223701	BnaA01g03370D [Brassica napus]	-	-	-	-	-	GO:0003824//catalytic activity;GO:0016787//hydrolase activity	-
BnaA01g03410D	101.343	57.3067	2.13	1.08667	101.727	53.9767	2.36333	1.16333	-0.970944	0.00489325	-1.02256	0.00527409	BnaA01g03410D [Brassica napus]	-	-	-	-	GO:0005622//intracellular;GO:0044444//cytoplasmic part;GO:0043229//intracellular organelle;GO:0044424//intracellular part;GO:0043226//organelle;GO:0009536//plastid;GO:0044464//cell part;GO:0005623//cell;GO:0043231//intracellular membrane-bounded organelle;GO:0005737//cytoplasm;GO:0043227//membrane-bounded organelle	GO:0003824//catalytic activity	GO:0006073//cellular glucan metabolic process;GO:0071704//organic substance metabolic process;GO:0005975//carbohydrate metabolic process;GO:0006468//protein phosphorylation;GO:0065009//regulation of molecular function;GO:0009314//response to radiation;GO:0008152//metabolic process;GO:0044699//single-organism process;GO:0051179//localization;GO:0006818//hydrogen transport;GO:0044237//cellular meta…
BnaA01g03420D	34.38	16	1.36	0.573333	45.33	20.3333	1.97333	0.79	-1.24616	0.00282935	-1.32071	0.011876	BnaA01g03420D [Brassica napus]	-	-	-	-	-	-	GO:0008283//cell proliferation;GO:0032502//developmental process;GO:0032501//multicellular organismal process;GO:0048731//system development;GO:0048528//post-embryonic root development;GO:0007275//multicellular organism development;GO:0009653//anatomical structure morphogenesis;GO:0048513//animal organ development;GO:0009886//post-embryonic morphogenesis;GO:0044707//single-multicellular organism …
BnaA01g03430D	438.893	121.683	15.4667	3.93	366.603	131.513	14.3567	4.7	-1.97656	2.44e-15	-1.61099	5.74855e-08	BnaA01g03430D [Brassica napus]	-	-	-	-	-	GO:0008233//peptidase activity;GO:0004175//endopeptidase activity;GO:0070011//peptidase activity, acting on L-amino acid peptides;GO:0016787//hydrolase activity;GO:0070001//aspartic-type peptidase activity;GO:0003824//catalytic activity;GO:0004190//aspartic-type endopeptidase activity	GO:0071704//organic substance metabolic process;GO:0044238//primary metabolic process;GO:0043170//macromolecule metabolic process;GO:0006508//proteolysis;GO:0019538//protein metabolic process;GO:0008152//metabolic process
BnaA01g03440D	224.163	146.213	16.76	9.90667	231.093	116.077	19.07	8.59667	-0.758551	0.00296455	-1.14946	0.00136299	BnaA01g03440D [Brassica napus]	-	-	-	-	-	-	-
BnaA01g03450D	14.3933	8.72	1.15333	0.673333	29.33	10.5433	2.66667	0.903333	-0.776417	0.368209	-1.56171	0.00438335	BnaA01g03450D [Brassica napus]	-	-	-	-	-	-	-
BnaA01g03460D	270.667	64	10.4233	2.24333	167.667	51	7.15667	1.98333	-2.2161	1.57e-16	-1.85136	5.41931e-08	BnaA01g03460D [Brassica napus]	-	-	-	-	GO:0044424//intracellular part;GO:0043226//organelle;GO:0044464//cell part;GO:0043231//intracellular membrane-bounded organelle;GO:0005622//intracellular;GO:0043229//intracellular organelle;GO:0005623//cell;GO:0043227//membrane-bounded organelle;GO:0009536//plastid;GO:0044444//cytoplasmic part;GO:0005737//cytoplasm	GO:0019903//protein phosphatase binding;GO:0016811//hydrolase activity, acting on carbon-nitrogen (but not peptide) bonds, in linear amides;GO:0019899//enzyme binding;GO:0005515//protein binding;GO:0008092//cytoskeletal protein binding;GO:0016810//hydrolase activity, acting on carbon-nitrogen (but not peptide) bonds;GO:0005488//binding;GO:0003824//catalytic activity;GO:0016787//hydrolase activity…	GO:0006807//nitrogen compound metabolic process;GO:0006464//cellular protein modification process;GO:0019757//glycosinolate metabolic process;GO:0005982//starch metabolic process;GO:0044262//cellular carbohydrate metabolic process;GO:0016143//S-glycoside metabolic process;GO:0005984//disaccharide metabolic process;GO:0006325//chromatin organization;GO:0019538//protein metabolic process;GO:0044042…
BnaA01g03470D	1.66667	181	0.166667	17.32	75	285.333	8.84	31.0133	6.69933	2.18e-36	1.81077	1.14909e-05	BnaA01g03470D [Brassica napus]	-	-	-	-	-	-	-
BnaA01g03500D	25.3333	8	0.963333	0.266667	39.3333	14.6667	1.64333	0.553333	-1.853	0.00840328	-1.5704	0.00928649	BnaA01g03500D [Brassica napus]	-	-	-	-	-	GO:0003824//catalytic activity;GO:0004553//hydrolase activity, hydrolyzing O-glycosyl compounds;GO:0016787//hydrolase activity;GO:0016798//hydrolase activity, acting on glycosyl bonds;GO:0004650//polygalacturonase activity	GO:0044238//primary metabolic process;GO:0071704//organic substance metabolic process;GO:0005975//carbohydrate metabolic process;GO:0008152//metabolic process
BnaA01g03550D	151.333	32	2.42333	0.466667	126.667	32.6667	2.24333	0.533333	-2.37653	3.04e-15	-2.07253	9.31759e-10	BnaA01g03550D [Brassica napus]	-	-	-	-	-	-	GO:0044763//single-organism cellular process;GO:0009987//cellular process;GO:0009653//anatomical structure morphogenesis;GO:0048856//anatomical structure development;GO:0000902//cell morphogenesis;GO:0071555//cell wall organization;GO:0044767//single-organism developmental process;GO:0030154//cell differentiation;GO:0032502//developmental process;GO:0071840//cellular component organization or bio…
BnaA01g03580D	220.01	11.15	4.75333	0.223333	373.487	90.5567	8.90667	1.94667	-4.41167	8.86e-22	-2.19388	3.97743e-06	BnaA01g03580D [Brassica napus]	-	-	-	-	-	GO:0036094//small molecule binding;GO:0043531//ADP binding;GO:0097159//organic cyclic compound binding;GO:1901363//heterocyclic compound binding;GO:0032555//purine ribonucleotide binding;GO:0097367//carbohydrate derivative binding;GO:0005488//binding;GO:1901265//nucleoside phosphate binding;GO:0017076//purine nucleotide binding;GO:0032550//purine ribonucleoside binding;GO:0043167//ion binding;GO:…	GO:0006952//defense response;GO:0050896//response to stimulus;GO:0006950//response to stress
BnaA01g03590D	14.6667	2.66667	0.476667	0.0833333	13.7067	4.66667	0.506667	0.15	-2.51602	0.00186108	-1.75607	0.0255664	BnaA01g03590D [Brassica napus]	Genetic Information Processing	Folding, sorting and degradation	ko04120//Ubiquitin mediated proteolysis	K03363	GO:0019898//extrinsic component of membrane;GO:0031234//extrinsic component of cytoplasmic side of plasma membrane;GO:0032991//macromolecular complex;GO:0044424//intracellular part;GO:0009898//cytoplasmic side of plasma membrane;GO:0005886//plasma membrane;GO:0044459//plasma membrane part;GO:0043226//organelle;GO:0016020//membrane;GO:0005623//cell;GO:0043234//protein complex;GO:0005622//intracell…	GO:0005488//binding;GO:0005515//protein binding	GO:0044699//single-organism process;GO:0007154//cell communication;GO:0044763//single-organism cellular process;GO:0009987//cellular process
BnaA01g03620D	1.66667	0	0.06	0.001	6.03667	0	0.24	0.001	-5.90689	0.160662	-7.90689	0.00191794	BnaA01g03620D [Brassica napus]	Metabolism	Carbohydrate metabolism;Global and Overview	ko01100//Metabolic pathways;ko00500//Starch and sucrose metabolism;ko00040//Pentose and glucuronate interconversions	K01051	GO:0044464//cell part;GO:0030312//external encapsulating structure;GO:0005623//cell;GO:0005618//cell wall;GO:0071944//cell periphery	GO:0003824//catalytic activity;GO:0052689//carboxylic ester hydrolase activity;GO:0004857//enzyme inhibitor activity;GO:0098772//molecular function regulator;GO:0016788//hydrolase activity, acting on ester bonds;GO:0016787//hydrolase activity;GO:0030599//pectinesterase activity;GO:0030234//enzyme regulator activity	GO:0071555//cell wall organization;GO:0042545//cell wall modification;GO:0071554//cell wall organization or biogenesis;GO:0009987//cellular process;GO:0045229//external encapsulating structure organization;GO:0071840//cellular component organization or biogenesis;GO:0016043//cellular component organization
BnaA01g03630D	354.793	145.063	6.05667	2.25667	397.333	210.327	7.58667	3.66667	-1.42433	3.56e-09	-1.049	0.000176925	BnaA01g03630D [Brassica napus]	-	-	-	-	-	GO:0005515//protein binding;GO:0005488//binding	-
BnaA01g03670D	21	4.66667	0.96	0.18	18.91	5	0.926667	0.226667	-2.41504	0.00554418	-2.03148	0.00160883	BnaA01g03670D [Brassica napus]	-	-	-	-	-	GO:0005515//protein binding;GO:0005488//binding	-
BnaA01g03680D	426.477	205.667	7.22333	3.18333	504.257	945.39	9.62667	15.9267	-1.18213	0.000271281	0.726336	0.26853	BnaA01g03680D [Brassica napus]	Metabolism	Amino acid metabolism;Global and Overview	ko01100//Metabolic pathways;ko01110//Biosynthesis of secondary metabolites;ko01130//Biosynthesis of antibiotics;ko00310//Lysine degradation	K14157	-	GO:1901363//heterocyclic compound binding;GO:0000166//nucleotide binding;GO:0097159//organic cyclic compound binding;GO:0005488//binding;GO:1901265//nucleoside phosphate binding;GO:0016491//oxidoreductase activity;GO:0003824//catalytic activity;GO:0036094//small molecule binding	GO:0008152//metabolic process;GO:0055114//oxidation-reduction process;GO:0044710//single-organism metabolic process;GO:0044699//single-organism process
BnaA01g03730D	147.637	39.2867	7.14667	1.74	67.3333	54.4967	3.68	2.66667	-2.03818	7.2e-12	-0.464668	0.316296	BnaA03g52360D [Brassica napus]	-	-	-	-	-	GO:0003824//catalytic activity;GO:0016788//hydrolase activity, acting on ester bonds;GO:0016791//phosphatase activity;GO:0016787//hydrolase activity;GO:0042578//phosphoric ester hydrolase activity	-
BnaA01g03780D	10	1	0.606667	0.0566667	10.38	2.33333	0.73	0.16	-3.42033	0.000673718	-2.18982	0.0160431	BnaA01g03780D [Brassica napus]	-	-	-	-	GO:0044424//intracellular part;GO:0005622//intracellular;GO:0043226//organelle;GO:0043229//intracellular organelle;GO:0043227//membrane-bounded organelle;GO:0043231//intracellular membrane-bounded organelle;GO:0005623//cell;GO:0044464//cell part	-	-
BnaA01g03790D	844.01	442.427	16.7733	8.03333	635.103	435.353	14.0433	8.86667	-1.0621	1.28e-05	-0.663422	0.0131093	PREDICTED: aminopeptidase M1 [Brassica rapa]	-	-	-	-	-	GO:0008270//zinc ion binding;GO:0005488//binding;GO:0046872//metal ion binding;GO:0043167//ion binding;GO:0070011//peptidase activity, acting on L-amino acid peptides;GO:0043169//cation binding;GO:0003824//catalytic activity;GO:0008237//metallopeptidase activity;GO:0046914//transition metal ion binding;GO:0008233//peptidase activity;GO:0016787//hydrolase activity	GO:0071704//organic substance metabolic process;GO:0043170//macromolecule metabolic process;GO:0006508//proteolysis;GO:0044238//primary metabolic process;GO:0008152//metabolic process;GO:0019538//protein metabolic process
BnaA01g03820D	17.0867	6	0.766667	0.236667	171.54	18	8.48	0.78	-1.69574	0.00608449	-3.44252	6.41852e-14	BnaA01g03820D [Brassica napus]	-	-	-	-	-	-	-
BnaA01g03830D	412.997	105.337	53.9967	12.5033	258.737	129.673	37.36	17.1633	-2.11056	3.19e-16	-1.12216	0.000108153	BnaA01g03830D [Brassica napus]	-	-	-	-	-	GO:0009055//electron carrier activity;GO:0015036//disulfide oxidoreductase activity;GO:0016491//oxidoreductase activity;GO:0003824//catalytic activity;GO:0015035//protein disulfide oxidoreductase activity;GO:0016667//oxidoreductase activity, acting on a sulfur group of donors	GO:0050789//regulation of biological process;GO:0019725//cellular homeostasis;GO:0003006//developmental process involved in reproduction;GO:0065007//biological regulation;GO:0032502//developmental process;GO:0042592//homeostatic process;GO:0000003//reproduction;GO:0022414//reproductive process;GO:0044699//single-organism process;GO:0065008//regulation of biological quality;GO:0050794//regulation …
BnaA01g03850D	1	0.333333	0.0433333	0.0133333	8.66667	0	0.43	0.001	-1.70044	0.789175	-8.74819	0.000439656	BnaA01g03850D [Brassica napus]	-	-	-	-	GO:0016021//integral component of membrane;GO:0005622//intracellular;GO:0005623//cell;GO:0044444//cytoplasmic part;GO:0043226//organelle;GO:0044425//membrane part;GO:0031224//intrinsic component of membrane;GO:0016020//membrane;GO:0044424//intracellular part;GO:0043227//membrane-bounded organelle;GO:0043231//intracellular membrane-bounded organelle;GO:0005737//cytoplasm;GO:0009536//plastid;GO:004…	GO:0046873//metal ion transmembrane transporter activity;GO:0008324//cation transmembrane transporter activity;GO:0022857//transmembrane transporter activity;GO:0072509//divalent inorganic cation transmembrane transporter activity;GO:0022891//substrate-specific transmembrane transporter activity;GO:0022892//substrate-specific transporter activity;GO:0022890//inorganic cation transmembrane transpo…	GO:0042221//response to chemical;GO:0044763//single-organism cellular process;GO:0006810//transport;GO:0071577//zinc II ion transmembrane transport;GO:0072511//divalent inorganic cation transport;GO:0010035//response to inorganic substance;GO:0006812//cation transport;GO:0044765//single-organism transport;GO:1902578//single-organism localization;GO:0006829//zinc II ion transport;GO:0051179//local…
BnaA01g03860D	21473.9	8803.56	342.533	127.907	15148.2	7697.84	267.987	125.77	-1.42115	4.3e-07	-1.09137	0.000171229	PREDICTED: glycine dehydrogenase (decarboxylating) 1, mitochondrial [Brassica napus]	Metabolism	Global and Overview;Amino acid metabolism;Carbohydrate metabolism	ko01100//Metabolic pathways;ko01110//Biosynthesis of secondary metabolites;ko01130//Biosynthesis of antibiotics;ko01200//Carbon metabolism;ko00630//Glyoxylate and dicarboxylate metabolism;ko00260//Glycine, serine and threonine metabolism	K00281	GO:0031976//plastid thylakoid;GO:0044464//cell part;GO:0009526//plastid envelope;GO:0031975//envelope;GO:0009532//plastid stroma;GO:0009579//thylakoid;GO:0009536//plastid;GO:0031967//organelle envelope;GO:0044444//cytoplasmic part;GO:0043226//organelle;GO:0043229//intracellular organelle;GO:0031984//organelle subcompartment;GO:0005737//cytoplasm;GO:0005576//extracellular region;GO:0005622//intrac…	GO:0048037//cofactor binding;GO:0097159//organic cyclic compound binding;GO:0016491//oxidoreductase activity;GO:0003824//catalytic activity;GO:0005488//binding;GO:0004375//glycine dehydrogenase (decarboxylating) activity;GO:0016638//oxidoreductase activity, acting on the CH-NH2 group of donors;GO:1901363//heterocyclic compound binding;GO:0043167//ion binding;GO:0016642//oxidoreductase activity, a…	GO:0048731//system development;GO:0048513//animal organ development;GO:0044249//cellular biosynthetic process;GO:0006793//phosphorus metabolic process;GO:0044707//single-multicellular organism process;GO:0043170//macromolecule metabolic process;GO:0044763//single-organism cellular process;GO:0006753//nucleoside phosphate metabolic process;GO:0032787//monocarboxylic acid metabolic process;GO:00059…
BnaA01g03880D	99	33	5.01	1.55667	112.333	53	6.33333	2.77333	-1.68635	5.39e-07	-1.19134	0.00974303	PREDICTED: calcineurin B-like protein 10 [Brassica rapa]	-	-	-	-	-	GO:0043169//cation binding;GO:0005488//binding;GO:0046872//metal ion binding;GO:0005509//calcium ion binding;GO:0043167//ion binding	-
BnaA01g03890D	24.6133	4.86333	1.00333	0.183333	15	4	0.673333	0.163333	-2.45226	2.37e-05	-2.0435	0.00829768	BnaA01g03890D [Brassica napus]	-	-	-	-	GO:0005622//intracellular;GO:0043226//organelle;GO:0043229//intracellular organelle;GO:0044464//cell part;GO:0044424//intracellular part;GO:0005623//cell;GO:0043227//membrane-bounded organelle;GO:0043231//intracellular membrane-bounded organelle	GO:0003700//transcription factor activity, sequence-specific DNA binding;GO:1901363//heterocyclic compound binding;GO:0043565//sequence-specific DNA binding;GO:0097159//organic cyclic compound binding;GO:0001071//nucleic acid binding transcription factor activity;GO:0005488//binding;GO:0003677//DNA binding;GO:0003676//nucleic acid binding	GO:0044710//single-organism metabolic process;GO:0044767//single-organism developmental process;GO:1901360//organic cyclic compound metabolic process;GO:0019752//carboxylic acid metabolic process;GO:0032774//RNA biosynthetic process;GO:0009653//anatomical structure morphogenesis;GO:0009069//serine family amino acid metabolic process;GO:1901576//organic substance biosynthetic process;GO:0043436//o…
BnaA01g04000D	12152.9	885.127	381.367	25.5233	12709.8	2277.94	444.767	72.3367	-3.90129	3.05e-52	-2.62025	1.09143e-18	BnaA01g04000D [Brassica napus]	-	-	-	-	GO:0043226//organelle;GO:0005623//cell;GO:0005737//cytoplasm;GO:0044464//cell part;GO:0043227//membrane-bounded organelle;GO:0005773//vacuole;GO:0043231//intracellular membrane-bounded organelle;GO:0044444//cytoplasmic part;GO:0005622//intracellular;GO:0043229//intracellular organelle;GO:0044424//intracellular part	GO:0004175//endopeptidase activity;GO:0008233//peptidase activity;GO:0070011//peptidase activity, acting on L-amino acid peptides;GO:0004197//cysteine-type endopeptidase activity;GO:0003824//catalytic activity;GO:0016787//hydrolase activity;GO:0008234//cysteine-type peptidase activity	GO:0010467//gene expression;GO:0006810//transport;GO:0044238//primary metabolic process;GO:0051604//protein maturation;GO:0006508//proteolysis;GO:0071704//organic substance metabolic process;GO:0019538//protein metabolic process;GO:0016192//vesicle-mediated transport;GO:0008152//metabolic process;GO:0043170//macromolecule metabolic process;GO:0016485//protein processing;GO:0051179//localization;G…
BnaA01g04010D	117.667	41.3333	10.34	3.33333	95.3333	64.7333	9.32	5.81667	-1.6332	3.4e-08	-0.680137	0.0588649	BnaA01g04010D [Brassica napus]	-	-	-	-	-	-	-
BnaA01g04020D	39.22	181.807	0.48	2.03667	84.55	126.99	1.15333	1.56333	2.0851	1.54e-12	0.438816	0.302053	BnaA01g04020D [Brassica napus]	-	-	-	-	GO:0005623//cell;GO:0009536//plastid;GO:0043229//intracellular organelle;GO:0043231//intracellular membrane-bounded organelle;GO:0005622//intracellular;GO:0043226//organelle;GO:0043227//membrane-bounded organelle;GO:0005737//cytoplasm;GO:0044444//cytoplasmic part;GO:0044424//intracellular part;GO:0044464//cell part	-	GO:0008152//metabolic process;GO:0019538//protein metabolic process;GO:0006464//cellular protein modification process;GO:0044238//primary metabolic process;GO:0071704//organic substance metabolic process;GO:0044237//cellular metabolic process;GO:0043170//macromolecule metabolic process;GO:0009987//cellular process;GO:0044267//cellular protein metabolic process;GO:0043412//macromolecule modificati…
BnaA01g04030D	336.193	64.3333	8.16667	1.42333	318.93	116.213	8.62	2.85333	-2.52047	7.22e-20	-1.59504	9.95765e-08	BnaA01g04030D [Brassica napus]	Genetic Information Processing	Translation	ko03013//RNA transport	K14304	GO:0012505//endomembrane system;GO:0005623//cell;GO:0044464//cell part	GO:0005488//binding	GO:0008152//metabolic process;GO:0016568//chromatin modification;GO:0006807//nitrogen compound metabolic process;GO:0034641//cellular nitrogen compound metabolic process;GO:0048608//reproductive structure development;GO:0006325//chromatin organization;GO:1901700//response to oxygen-containing compound;GO:0006403//RNA localization;GO:1901701//cellular response to oxygen-containing compound;GO:0010…
BnaA01g04070D	4	0	0.46	0.001	1.66667	0.666667	0.22	0.0733333	-8.84549	0.0265026	-1.58496	0.710968	PREDICTED: lachrymatory-factor synthase-like [Brassica rapa]	-	-	-	-	GO:0043231//intracellular membrane-bounded organelle;GO:0043227//membrane-bounded organelle;GO:0044424//intracellular part;GO:0043226//organelle;GO:0005622//intracellular;GO:0044464//cell part;GO:0005623//cell;GO:0043229//intracellular organelle	-	-
BnaA01g04080D	7.66667	2.33333	0.756667	0.2	2.33333	2.66667	0.26	0.25	-1.91966	0.0437398	-0.0565835	1	BnaA01g04080D [Brassica napus]	-	-	-	-	-	-	-
BnaA01g04100D	494.873	286.857	9.46	4.98333	486.98	226.09	10.31	4.47333	-0.924729	5.21e-05	-1.20462	1.03897e-05	BnaA01g04100D [Brassica napus]	Genetic Information Processing	Translation	ko03015//mRNA surveillance pathway	K14376	GO:0043229//intracellular organelle;GO:0043227//membrane-bounded organelle;GO:0005622//intracellular;GO:0044424//intracellular part;GO:0005634//nucleus;GO:0005623//cell;GO:0043231//intracellular membrane-bounded organelle;GO:0044464//cell part;GO:0043226//organelle	GO:0097159//organic cyclic compound binding;GO:0003723//RNA binding;GO:0003676//nucleic acid binding;GO:0070566//adenylyltransferase activity;GO:0003824//catalytic activity;GO:0016779//nucleotidyltransferase activity;GO:1901363//heterocyclic compound binding;GO:0005488//binding;GO:0016740//transferase activity;GO:0004652//polynucleotide adenylyltransferase activity;GO:0016772//transferase activit…	GO:0010467//gene expression;GO:0009987//cellular process;GO:0006725//cellular aromatic compound metabolic process;GO:0034641//cellular nitrogen compound metabolic process;GO:0046483//heterocycle metabolic process;GO:0071704//organic substance metabolic process;GO:0044237//cellular metabolic process;GO:0006807//nitrogen compound metabolic process;GO:0031123//RNA 3'-end processing;GO:0006139//nucle…
BnaA01g04130D	426.7	121.607	4.16	1.09	343.263	131.93	3.73667	1.3	-1.93226	1.82e-15	-1.52324	5.12129e-08	BnaA01g04130D [Brassica napus]	-	-	-	-	-	GO:0005515//protein binding;GO:0005488//binding	-
BnaA01g04150D	18.6667	115	1.21	6.93	36	31	2.63667	2.10333	2.51785	1.04e-09	-0.326038	0.630478	BnaA01g04150D [Brassica napus]	-	-	-	-	-	GO:0005488//binding;GO:0003677//DNA binding;GO:1901363//heterocyclic compound binding;GO:0003700//transcription factor activity, sequence-specific DNA binding;GO:0003676//nucleic acid binding;GO:0097159//organic cyclic compound binding;GO:0001071//nucleic acid binding transcription factor activity	-
BnaA01g04160D	28.3333	5.50333	1.09667	0.196667	25.0533	9	1.06333	0.35	-2.4793	0.000138665	-1.60317	0.0381517	PREDICTED: VAN3-binding protein isoform X1 [Brassica rapa]	-	-	-	-	-	-	-
BnaA01g04220D	7.82333	1	0.163333	0.02	4.13333	2.00333	0.0966667	0.04	-3.02975	0.00443321	-1.27302	0.389394	BnaA01g04220D [Brassica napus]	-	-	-	-	-	GO:0005488//binding;GO:1901363//heterocyclic compound binding;GO:0003676//nucleic acid binding;GO:0003682//chromatin binding;GO:0044877//macromolecular complex binding;GO:0097159//organic cyclic compound binding;GO:0003677//DNA binding	-
BnaA01g04290D	50.5767	23.0433	0.476667	0.196667	43.6167	13.5067	0.456667	0.126667	-1.27723	0.00172138	-1.8501	0.000470679	BnaA01g04290D [Brassica napus]	-	-	-	-	-	GO:0016787//hydrolase activity;GO:0003887//DNA-directed DNA polymerase activity;GO:0035639//purine ribonucleoside triphosphate binding;GO:0097159//organic cyclic compound binding;GO:0032550//purine ribonucleoside binding;GO:0032555//purine ribonucleotide binding;GO:0036094//small molecule binding;GO:0032549//ribonucleoside binding;GO:0016818//hydrolase activity, acting on acid anhydrides, in phos…	GO:0009628//response to abiotic stimulus;GO:0044238//primary metabolic process;GO:0044249//cellular biosynthetic process;GO:0006725//cellular aromatic compound metabolic process;GO:0009416//response to light stimulus;GO:0034641//cellular nitrogen compound metabolic process;GO:1901360//organic cyclic compound metabolic process;GO:0090304//nucleic acid metabolic process;GO:1901576//organic substanc…
BnaA01g04300D	36	33	2.30333	1.96667	39.6667	17.3333	2.84667	1.12333	-0.227971	0.665099	-1.34149	0.0134216	PREDICTED: two-on-two hemoglobin-3 [Brassica napus]	-	-	-	-	-	GO:0046906//tetrapyrrole binding;GO:0046914//transition metal ion binding;GO:0046872//metal ion binding;GO:0022892//substrate-specific transporter activity;GO:0097159//organic cyclic compound binding;GO:0043167//ion binding;GO:1901363//heterocyclic compound binding;GO:0005488//binding;GO:0005215//transporter activity;GO:0019825//oxygen binding;GO:0005506//iron ion binding;GO:0043169//cation bindi…	GO:0044699//single-organism process;GO:0051179//localization;GO:0006950//response to stress;GO:0051234//establishment of localization;GO:1902578//single-organism localization;GO:0015671//oxygen transport;GO:0009725//response to hormone;GO:0010033//response to organic substance;GO:0009719//response to endogenous stimulus;GO:0006810//transport;GO:0042221//response to chemical;GO:0015669//gas transp…
BnaA01g04310D	57	57.6667	3.61667	3.35667	49	14.3333	3.49333	0.94	-0.107631	0.850761	-1.89387	4.73439e-05	BnaA01g04310D [Brassica napus]	-	-	-	-	-	-	-
BnaA01g04330D	5.33333	0.666667	0.1	0.0133333	0	0.333333	0.001	0.00666667	-2.90689	0.0280699	2.73697	1	BnaA01g04330D [Brassica napus]	Genetic Information Processing	Folding, sorting and degradation	ko04141//Protein processing in endoplasmic reticulum	K10661	-	-	-
BnaA01g04340D	161.25	68.3967	6.15	2.35667	145.967	74.57	6.15	2.96667	-1.38384	2.59e-07	-1.05174	0.00246081	PREDICTED: serine/threonine-protein kinase AFC3 isoform X1 [Brassica rapa]	-	-	-	-	GO:0044424//intracellular part;GO:0005622//intracellular;GO:0044464//cell part;GO:0005623//cell	GO:0003824//catalytic activity;GO:0043167//ion binding;GO:0005488//binding;GO:0032550//purine ribonucleoside binding;GO:0032549//ribonucleoside binding;GO:0043168//anion binding;GO:0035639//purine ribonucleoside triphosphate binding;GO:0005524//ATP binding;GO:0016773//phosphotransferase activity, alcohol group as acceptor;GO:0032555//purine ribonucleotide binding;GO:0097367//carbohydrate derivati…	GO:0043412//macromolecule modification;GO:0044249//cellular biosynthetic process;GO:0019538//protein metabolic process;GO:0010467//gene expression;GO:0044260//cellular macromolecule metabolic process;GO:0034645//cellular macromolecule biosynthetic process;GO:0036211//protein modification process;GO:0009058//biosynthetic process;GO:0034641//cellular nitrogen compound metabolic process;GO:0043170//…
BnaA01g04350D	7.65	0.333333	0.22	0.01	1.66667	0	0.0533333	0.001	-4.45943	0.00124954	-5.73697	0.208684	PREDICTED: potassium channel KAT3-like [Brassica napus]	-	-	-	-	GO:0016020//membrane	GO:0005215//transporter activity;GO:0022892//substrate-specific transporter activity;GO:0022836//gated channel activity;GO:0015079//potassium ion transmembrane transporter activity;GO:0022857//transmembrane transporter activity;GO:0022832//voltage-gated channel activity;GO:0015267//channel activity;GO:0008324//cation transmembrane transporter activity;GO:0005244//voltage-gated ion channel activit…	GO:0044763//single-organism cellular process;GO:0006812//cation transport;GO:0009987//cellular process;GO:0051234//establishment of localization;GO:0051179//localization;GO:0044699//single-organism process;GO:1902578//single-organism localization;GO:0015672//monovalent inorganic cation transport;GO:0044765//single-organism transport;GO:0006810//transport;GO:0055085//transmembrane transport;GO:000…
BnaA01g04420D	168	377.667	7.02667	14.3633	233.273	281.373	10.8267	11.92	1.03148	8.33e-06	0.138795	0.716375	PREDICTED: nucleolin-like [Brassica napus]	-	-	-	-	-	-	-
BnaA01g04430D	74.0067	25	4.34333	1.35667	57.3333	37.6667	3.74667	2.23333	-1.67874	1.23e-06	-0.746409	0.130532	BnaA01g04430D [Brassica napus]	-	-	-	-	GO:0044422//organelle part;GO:0005623//cell;GO:0043231//intracellular membrane-bounded organelle;GO:0005739//mitochondrion;GO:0070013//intracellular organelle lumen;GO:0043233//organelle lumen;GO:0044424//intracellular part;GO:0005737//cytoplasm;GO:0005759//mitochondrial matrix;GO:0043229//intracellular organelle;GO:0044446//intracellular organelle part;GO:0043227//membrane-bounded organelle;GO:0…	-	-
BnaA01g04440D	406.837	961.44	11.9733	25.8067	209.55	452.553	6.82667	13.7	1.10792	7.46e-06	1.00492	0.000738882	BnaA01g04440D [Brassica napus]	-	-	-	-	-	GO:0046872//metal ion binding;GO:0005488//binding;GO:0043167//ion binding;GO:0043169//cation binding;GO:0046914//transition metal ion binding;GO:0008270//zinc ion binding;GO:0005515//protein binding	-
BnaA01g04460D	72.59	12	3.12	0.473333	63.1067	15.3333	2.96	0.663333	-2.72062	1.33e-10	-2.15779	7.81749e-07	BnaA01g04460D [Brassica napus]	-	-	-	-	-	GO:0005488//binding	-
BnaA01g04470D	29.15	5.84	1.45	0.263333	30.0133	12.3133	1.66333	0.653333	-2.46109	2.68e-06	-1.34819	0.0396269	BnaA01g04470D [Brassica napus]	-	-	-	-	GO:0005622//intracellular;GO:0043231//intracellular membrane-bounded organelle;GO:0043227//membrane-bounded organelle;GO:0043229//intracellular organelle;GO:0044424//intracellular part;GO:0005623//cell;GO:0043226//organelle;GO:0044464//cell part	-	-
BnaA01g04520D	412.377	521.023	5.75667	6.61667	473.413	233.94	7.34	3.46	0.200871	0.491335	-1.08501	0.00363229	BnaA01g04520D [Brassica napus]	-	-	-	-	GO:0016020//membrane;GO:0031224//intrinsic component of membrane;GO:0044425//membrane part;GO:0016021//integral component of membrane	GO:0003824//catalytic activity;GO:0022891//substrate-specific transmembrane transporter activity;GO:0022892//substrate-specific transporter activity;GO:0043168//anion binding;GO:0099516//ion antiporter activity;GO:0015291//secondary active transmembrane transporter activity;GO:0030170//pyridoxal phosphate binding;GO:0005215//transporter activity;GO:0016741//transferase activity, transferring one-…	GO:0006520//cellular amino acid metabolic process;GO:1901605//alpha-amino acid metabolic process;GO:0044765//single-organism transport;GO:0006811//ion transport;GO:0009987//cellular process;GO:0019752//carboxylic acid metabolic process;GO:0006563//L-serine metabolic process;GO:0006544//glycine metabolic process;GO:0044281//small molecule metabolic process;GO:0051179//localization;GO:0044699//sing…
BnaA01g04540D	172.383	183.31	13.0133	12.5367	162.657	63.4133	13.61	5.23	-0.0538367	0.93218	-1.37978	0.00470724	PREDICTED: cytochrome b-c1 complex subunit 7-1 [Brassica rapa]	Metabolism	Energy metabolism;Global and Overview	ko01100//Metabolic pathways;ko00190//Oxidative phosphorylation	K00417	GO:0044437//vacuolar part;GO:0045275//respiratory chain complex III;GO:0005750//mitochondrial respiratory chain complex III;GO:0044444//cytoplasmic part;GO:0031967//organelle envelope;GO:0043227//membrane-bounded organelle;GO:0044464//cell part;GO:0005740//mitochondrial envelope;GO:0098798//mitochondrial protein complex;GO:0005623//cell;GO:1902494//catalytic complex;GO:0043231//intracellular memb…	GO:0008324//cation transmembrane transporter activity;GO:0022857//transmembrane transporter activity;GO:0022890//inorganic cation transmembrane transporter activity;GO:0015077//monovalent inorganic cation transmembrane transporter activity;GO:0022892//substrate-specific transporter activity;GO:0005215//transporter activity;GO:0015075//ion transmembrane transporter activity;GO:0015078//hydrogen io…	GO:0045333//cellular respiration;GO:0022904//respiratory electron transport chain;GO:0051603//proteolysis involved in cellular protein catabolic process;GO:0022900//electron transport chain;GO:0044260//cellular macromolecule metabolic process;GO:0043933//macromolecular complex subunit organization;GO:0055114//oxidation-reduction process;GO:0019538//protein metabolic process;GO:0044237//cellular m…
BnaA01g04550D	45.15	12.91	1.77667	0.466667	14.4867	0.683333	0.63	0.0266667	-1.92871	0.00586197	-4.56224	0.000538331	BnaC01g06040D [Brassica napus]	-	-	-	-	GO:0005623//cell;GO:0030312//external encapsulating structure;GO:0071944//cell periphery;GO:0005618//cell wall;GO:0044464//cell part	-	-
BnaA01g04560D	30	7.33333	1.09667	0.236667	24.3333	3	0.98	0.123333	-2.2122	2.14e-05	-2.99022	0.000199	BnaA01g04560D [Brassica napus]	-	-	-	-	-	GO:0005488//binding;GO:0005515//protein binding	-
BnaA01g04570D	61.26	42.2333	1.73667	1.09667	39.8967	14.66	1.25	0.436667	-0.663196	0.0549807	-1.51732	0.00558056	BnaA01g04570D [Brassica napus]	-	-	-	-	-	-	-
BnaA01g04590D	185.777	142.463	4.2	2.91	206.387	64.4667	5.16333	1.5	-0.52937	0.0434152	-1.78334	4.09281e-07	BnaA01g04590D [Brassica napus]	-	-	-	-	-	GO:0016859//cis-trans isomerase activity;GO:0003755//peptidyl-prolyl cis-trans isomerase activity;GO:0016853//isomerase activity;GO:0003824//catalytic activity	GO:0006457//protein folding;GO:0009987//cellular process
BnaA01g04610D	61.3333	636.213	2.07333	19.55	33.3333	500	1.23	16.92	3.23714	9.79e-38	3.782	1.45202e-29	BnaA01g04610D [Brassica napus]	-	-	-	-	GO:0044424//intracellular part;GO:0044446//intracellular organelle part;GO:0044464//cell part;GO:0031090//organelle membrane;GO:0044444//cytoplasmic part;GO:0031967//organelle envelope;GO:0009526//plastid envelope;GO:0005622//intracellular;GO:0009536//plastid;GO:0019866//organelle inner membrane;GO:0043231//intracellular membrane-bounded organelle;GO:0043229//intracellular organelle;GO:0031975//e…	GO:0022857//transmembrane transporter activity;GO:0005215//transporter activity;GO:0015605//organophosphate ester transmembrane transporter activity;GO:1901677//phosphate transmembrane transporter activity	GO:0051716//cellular response to stimulus;GO:0051234//establishment of localization;GO:0022414//reproductive process;GO:0046942//carboxylic acid transport;GO:0006793//phosphorus metabolic process;GO:0015849//organic acid transport;GO:0015711//organic anion transport;GO:0009987//cellular process;GO:1902578//single-organism localization;GO:0044281//small molecule metabolic process;GO:0071702//organ…
BnaA01g04640D	85.6933	151.8	2.23333	3.60333	70.7633	158.327	2.01667	4.19667	0.690134	0.0169173	1.05727	0.00095691	BnaA01g04640D [Brassica napus]	-	-	-	-	-	-	-
BnaA01g04650D	772.917	114.057	37.2767	5.02	313.52	347.943	16.6767	17.2133	-2.89251	7.04e-23	0.0456955	0.978095	PREDICTED: zinc finger protein ZIC 2 isoform X2 [Brassica oleracea var. oleracea] [Brassica oleracea]	-	-	-	-	-	GO:0005488//binding;GO:0005515//protein binding	GO:0044763//single-organism cellular process;GO:0006807//nitrogen compound metabolic process;GO:0006351//transcription, DNA-templated;GO:0019438//aromatic compound biosynthetic process;GO:0090304//nucleic acid metabolic process;GO:0032502//developmental process;GO:0046483//heterocycle metabolic process;GO:0043170//macromolecule metabolic process;GO:0044237//cellular metabolic process;GO:0097659//…
BnaA01g04670D	142.81	55.22	2.67	0.936667	82.97	119.573	1.7	2.23667	-1.51123	4.86e-07	0.395816	0.385576	BnaA01g04670D [Brassica napus]	-	-	-	-	-	GO:0005488//binding;GO:0005524//ATP binding;GO:0003824//catalytic activity;GO:0001882//nucleoside binding;GO:0032550//purine ribonucleoside binding;GO:0004672//protein kinase activity;GO:0016772//transferase activity, transferring phosphorus-containing groups;GO:0032549//ribonucleoside binding;GO:0000166//nucleotide binding;GO:0001883//purine nucleoside binding;GO:0016740//transferase activity;GO…	GO:0006464//cellular protein modification process;GO:0006793//phosphorus metabolic process;GO:0019538//protein metabolic process;GO:0009987//cellular process;GO:0043412//macromolecule modification;GO:0043170//macromolecule metabolic process;GO:0006468//protein phosphorylation;GO:0044260//cellular macromolecule metabolic process;GO:0044238//primary metabolic process;GO:0008152//metabolic process;G…
BnaA01g04680D	41.2267	2	2.1	0.0933333	39	2	2.19333	0.0966667	-4.49185	1.62e-10	-4.50396	1.70386e-10	BnaA01g04680D [Brassica napus]	-	-	-	-	GO:0043227//membrane-bounded organelle;GO:0044464//cell part;GO:0043229//intracellular organelle;GO:0043226//organelle;GO:0043231//intracellular membrane-bounded organelle;GO:0044424//intracellular part;GO:0005623//cell;GO:0005622//intracellular	-	-
BnaA01g04710D	103.667	57	6.47	3.31667	62.6667	24.3333	4.32333	1.50667	-0.964032	0.0147183	-1.52078	0.0123662	PREDICTED: auxin-responsive protein IAA29 isoform X1 [Brassica rapa]	Environmental Information Processing	Signal transduction	ko04075//Plant hormone signal transduction	K14484	GO:0043229//intracellular organelle;GO:0043227//membrane-bounded organelle;GO:0005622//intracellular;GO:0005623//cell;GO:0044464//cell part;GO:0043231//intracellular membrane-bounded organelle;GO:0043226//organelle;GO:0044424//intracellular part;GO:0005634//nucleus	GO:0046983//protein dimerization activity;GO:0005515//protein binding;GO:0005488//binding	-
BnaA01g04720D	32.3333	17	2.07	1.00667	82.9167	32.3333	5.88333	2.08667	-1.04004	0.0289547	-1.49543	8.13202e-05	BnaA01g04720D [Brassica napus]	-	-	-	-	-	-	-
BnaA01g04750D	47.3333	3651.04	1.00667	71.4	47.4967	3414.09	1.12333	75.48	6.14827	9.9e-91	6.07024	1.7446e-68	BnaA01g04750D [Brassica napus]	-	-	-	-	-	-	GO:0050801//ion homeostasis;GO:0065007//biological regulation;GO:0065008//regulation of biological quality;GO:0010035//response to inorganic substance;GO:0010038//response to metal ion;GO:0055065//metal ion homeostasis;GO:0048878//chemical homeostasis;GO:0042221//response to chemical;GO:0098771//inorganic ion homeostasis;GO:0055080//cation homeostasis;GO:0042592//homeostatic process;GO:0055076//t…
BnaA01g04800D	72.11	73.1333	3.02	2.81667	99.3267	50.1267	4.59667	2.17667	-0.10056	0.850999	-1.07847	0.00580686	BnaA01g04800D [Brassica napus]	-	-	-	-	GO:0016020//membrane	GO:0016758//transferase activity, transferring hexosyl groups;GO:0016740//transferase activity;GO:0016757//transferase activity, transferring glycosyl groups;GO:0003824//catalytic activity;GO:0008378//galactosyltransferase activity	GO:0006520//cellular amino acid metabolic process;GO:0008652//cellular amino acid biosynthetic process;GO:0016053//organic acid biosynthetic process;GO:0010467//gene expression;GO:0044281//small molecule metabolic process;GO:0000096//sulfur amino acid metabolic process;GO:0019752//carboxylic acid metabolic process;GO:0009059//macromolecule biosynthetic process;GO:0009100//glycoprotein metabolic p…
BnaA01g04840D	244.75	296.49	6.37667	7.06	485.393	228.357	14.01	6.10667	0.146866	0.662008	-1.198	1.86914e-05	BnaA01g04840D [Brassica napus]	-	-	-	-	-	GO:0005488//binding;GO:0005515//protein binding	-
BnaA01g04850D	118.44	93.4933	3.78	2.72667	298.767	93.4633	10.6	3.06667	-0.471248	0.192127	-1.78932	5.01201e-11	BnaA01g04850D [Brassica napus]	-	-	-	-	GO:0005622//intracellular;GO:0044464//cell part;GO:0043227//membrane-bounded organelle;GO:0043226//organelle;GO:0043229//intracellular organelle;GO:0044424//intracellular part;GO:0043231//intracellular membrane-bounded organelle;GO:0005623//cell	GO:0043169//cation binding;GO:0043167//ion binding;GO:0046872//metal ion binding;GO:0005509//calcium ion binding;GO:0005488//binding	-
BnaA01g04880D	228.92	582.647	11.0367	25.69	429.57	396.417	23.05	19.5067	1.2189	0.000275785	-0.240799	0.456267	BnaA01g04880D [Brassica napus]	-	-	-	-	-	-	-
BnaA01g04890D	2054.18	4775.71	92.06	194.37	1788.61	3871.42	88.6833	177.243	1.07816	5.42e-05	0.998996	8.03324e-05	BnaA01g04890D [Brassica napus]	-	-	-	-	-	-	-
BnaA01g04900D	20.5133	3.43667	0.826667	0.126667	17.2967	7.58333	0.77	0.29	-2.70627	9.26e-06	-1.40881	0.132484	BnaA01g04900D [Brassica napus]	-	-	-	-	-	GO:0005488//binding;GO:0036094//small molecule binding;GO:0032553//ribonucleotide binding;GO:0005524//ATP binding;GO:0032555//purine ribonucleotide binding;GO:0043167//ion binding;GO:0097159//organic cyclic compound binding;GO:0032550//purine ribonucleoside binding;GO:1901363//heterocyclic compound binding;GO:0004674//protein serine/threonine kinase activity;GO:0032559//adenyl ribonucleotide bind…	GO:0043412//macromolecule modification;GO:0071704//organic substance metabolic process;GO:0008152//metabolic process;GO:0044238//primary metabolic process;GO:0019538//protein metabolic process;GO:0006793//phosphorus metabolic process;GO:0044267//cellular protein metabolic process;GO:0016310//phosphorylation;GO:0006464//cellular protein modification process;GO:0043170//macromolecule metabolic proc…
BnaA01g04910D	492.937	227.62	15.3733	6.49	503.573	272.61	17.3633	8.69333	-1.24414	1.29e-07	-0.998063	0.000873184	BnaA01g04910D [Brassica napus]	Metabolism	Biosynthesis of other secondary metabolites;Amino acid metabolism;Global and Overview	ko01100//Metabolic pathways;ko01110//Biosynthesis of secondary metabolites;ko01130//Biosynthesis of antibiotics;ko01230//Biosynthesis of amino acids;ko00270//Cysteine and methionine metabolism;ko01210//2-Oxocarboxylic acid metabolism;ko00330//Arginine and proline metabolism;ko00250//Alanine, aspartate and glutamate metabolism;ko00400//Phenylalanine, tyrosine and tryptophan biosynthesis;ko00360//P…	K00811	GO:0031975//envelope;GO:0005576//extracellular region;GO:0044424//intracellular part;GO:0043226//organelle;GO:0043227//membrane-bounded organelle;GO:0044464//cell part;GO:0031967//organelle envelope;GO:0005737//cytoplasm;GO:0044435//plastid part;GO:0009526//plastid envelope;GO:0005623//cell;GO:0009532//plastid stroma;GO:0009536//plastid;GO:0043231//intracellular membrane-bounded organelle;GO:0044…	GO:0043168//anion binding;GO:0048037//cofactor binding;GO:0008483//transaminase activity;GO:0030170//pyridoxal phosphate binding;GO:0043167//ion binding;GO:0097159//organic cyclic compound binding;GO:0016740//transferase activity;GO:1901363//heterocyclic compound binding;GO:0016769//transferase activity, transferring nitrogenous groups;GO:0003824//catalytic activity;GO:0005488//binding	GO:0044238//primary metabolic process;GO:0010038//response to metal ion;GO:0043436//oxoacid metabolic process;GO:0009987//cellular process;GO:0006520//cellular amino acid metabolic process;GO:0006082//organic acid metabolic process;GO:0006950//response to stress;GO:0044710//single-organism metabolic process;GO:0044237//cellular metabolic process;GO:0043449//cellular alkene metabolic process;GO:00…
BnaA01g04970D	23	4.33333	0.536667	0.0933333	36.3333	8	0.923333	0.173333	-2.52356	0.00191209	-2.4133	0.00498765	BnaA01g04970D [Brassica napus]	-	-	-	-	-	GO:0005515//protein binding;GO:0005488//binding	-
BnaA01g04980D	691.133	214.013	12.45	3.55	349.82	172.32	7.02667	3.16333	-1.81025	2.2e-14	-1.15139	2.1406e-05	BnaA01g04980D [Brassica napus]	-	-	-	-	-	-	-
BnaA01g05010D	59.6667	28.6667	1.42333	0.623333	55.6667	13.3333	1.47333	0.31	-1.1912	0.00162113	-2.24874	1.28427e-05	BnaA01g05010D [Brassica napus]	-	-	-	-	-	GO:0005488//binding;GO:0005515//protein binding	GO:0006793//phosphorus metabolic process;GO:0044281//small molecule metabolic process;GO:0071840//cellular component organization or biogenesis;GO:0044260//cellular macromolecule metabolic process;GO:0006073//cellular glucan metabolic process;GO:0044723//single-organism carbohydrate metabolic process;GO:1901360//organic cyclic compound metabolic process;GO:0006644//phospholipid metabolic process;…
BnaA01g05020D	14.3	5	1.10667	0.356667	19.3333	13	1.64	1	-1.63357	0.0116388	-0.713696	0.27774	PREDICTED: early nodulin-like protein 1 [Brassica rapa]	-	-	-	-	GO:0016020//membrane;GO:0044425//membrane part;GO:0031224//intrinsic component of membrane	GO:0005488//binding;GO:0005507//copper ion binding;GO:0043169//cation binding;GO:0009055//electron carrier activity;GO:0046872//metal ion binding;GO:0043167//ion binding;GO:0046914//transition metal ion binding	GO:0035383//thioester metabolic process;GO:1902410//mitotic cytokinetic process;GO:0044763//single-organism cellular process;GO:0022402//cell cycle process;GO:1903047//mitotic cell cycle process;GO:0048507//meristem development;GO:0010073//meristem maintenance;GO:0061640//cytoskeleton-dependent cytokinesis;GO:0043933//macromolecular complex subunit organization;GO:0009987//cellular process;GO:000…
BnaA01g05060D	196.86	62.92	11.0833	3.28333	366	38	23.13	2.2	-1.75516	0.00253418	-3.39419	1.7569e-26	BnaA01g05060D [Brassica napus]	-	-	-	-	-	GO:1901363//heterocyclic compound binding;GO:0097159//organic cyclic compound binding;GO:0003676//nucleic acid binding;GO:0043565//sequence-specific DNA binding;GO:0005488//binding;GO:0003700//transcription factor activity, sequence-specific DNA binding;GO:0003677//DNA binding;GO:0001071//nucleic acid binding transcription factor activity	-
BnaA01g05080D	276.963	1184.49	8.35333	32.5067	246.04	646.453	8.30333	19.8867	1.96031	7.22e-17	1.26004	2.22898e-06	BnaA01g05080D [Brassica napus]	Metabolism	Global and Overview;Lipid metabolism	ko01100//Metabolic pathways;ko00561//Glycerolipid metabolism	K03715	GO:0043227//membrane-bounded organelle;GO:0043231//intracellular membrane-bounded organelle;GO:0031967//organelle envelope;GO:0009536//plastid;GO:0009526//plastid envelope;GO:0009528//plastid inner membrane;GO:0016020//membrane;GO:0005623//cell;GO:0044435//plastid part;GO:0031975//envelope;GO:0044424//intracellular part;GO:0043226//organelle;GO:0044464//cell part;GO:0005622//intracellular;GO:0044…	GO:0008194//UDP-glycosyltransferase activity;GO:0035250//UDP-galactosyltransferase activity;GO:0016757//transferase activity, transferring glycosyl groups;GO:0030246//carbohydrate binding;GO:0016740//transferase activity;GO:0003824//catalytic activity;GO:0005488//binding;GO:0016758//transferase activity, transferring hexosyl groups;GO:0008378//galactosyltransferase activity	GO:0009247//glycolipid biosynthetic process;GO:0044802//single-organism membrane organization;GO:0008152//metabolic process;GO:0006996//organelle organization;GO:1901137//carbohydrate derivative biosynthetic process;GO:0050896//response to stimulus;GO:0044767//single-organism developmental process;GO:0009987//cellular process;GO:0001101//response to acid chemical;GO:0061024//membrane organization…
BnaA01g05090D	152.773	1110.6	6.28333	41.3633	172.45	683.257	7.89	28.3633	2.71875	5.04e-30	1.84593	3.89917e-11	BnaA01g05090D [Brassica napus]	-	-	-	-	-	GO:0004721//phosphoprotein phosphatase activity;GO:0004722//protein serine/threonine phosphatase activity;GO:0016788//hydrolase activity, acting on ester bonds;GO:0016787//hydrolase activity;GO:0003824//catalytic activity;GO:0016791//phosphatase activity;GO:0042578//phosphoric ester hydrolase activity	GO:0006796//phosphate-containing compound metabolic process;GO:0006793//phosphorus metabolic process;GO:0016311//dephosphorylation;GO:0006464//cellular protein modification process;GO:0044260//cellular macromolecule metabolic process;GO:0043412//macromolecule modification;GO:0071704//organic substance metabolic process;GO:0008152//metabolic process;GO:0036211//protein modification process;GO:0009…
BnaA01g05100D	109.247	53.8367	7.88667	3.55333	85.5467	79.3367	6.84	5.84333	-1.15024	0.00013418	-0.227205	0.612905	PREDICTED: ADP-ribosylation factor 1-like [Brassica rapa]	-	-	-	-	GO:0044464//cell part;GO:0044424//intracellular part;GO:0044431//Golgi apparatus part;GO:0016020//membrane;GO:0044422//organelle part;GO:0043227//membrane-bounded organelle;GO:0043231//intracellular membrane-bounded organelle;GO:0044446//intracellular organelle part;GO:0043226//organelle;GO:0044444//cytoplasmic part;GO:0005623//cell;GO:0005622//intracellular;GO:0043229//intracellular organelle;GO…	GO:0097159//organic cyclic compound binding;GO:0032555//purine ribonucleotide binding;GO:0000166//nucleotide binding;GO:1901363//heterocyclic compound binding;GO:0001882//nucleoside binding;GO:0032549//ribonucleoside binding;GO:0019001//guanyl nucleotide binding;GO:1901265//nucleoside phosphate binding;GO:0001883//purine nucleoside binding;GO:0032550//purine ribonucleoside binding;GO:0043168//ani…	GO:0006886//intracellular protein transport;GO:0044763//single-organism cellular process;GO:0044262//cellular carbohydrate metabolic process;GO:0050896//response to stimulus;GO:0050794//regulation of cellular process;GO:0070727//cellular macromolecule localization;GO:0009987//cellular process;GO:0042221//response to chemical;GO:0005975//carbohydrate metabolic process;GO:0008152//metabolic process…
BnaA01g05120D	8	1.33333	0.43	0.07	31.63	2.33333	1.90333	0.123333	-2.61891	0.00680806	-3.94789	0.000337297	BnaA01g05120D [Brassica napus]	-	-	-	-	-	GO:0008168//methyltransferase activity;GO:0008171//O-methyltransferase activity;GO:0016741//transferase activity, transferring one-carbon groups;GO:0003824//catalytic activity;GO:0016740//transferase activity	-
BnaA01g05140D	63.3333	25	1.8	0.653333	34.6667	20	1.11	0.6	-1.46211	0.00239235	-0.887525	0.175076	BnaA01g05140D [Brassica napus]	-	-	-	-	-	GO:0003824//catalytic activity;GO:0016790//thiolester hydrolase activity;GO:0043169//cation binding;GO:0016788//hydrolase activity, acting on ester bonds;GO:0046914//transition metal ion binding;GO:0043167//ion binding;GO:0008270//zinc ion binding;GO:0046872//metal ion binding;GO:0005488//binding;GO:0016787//hydrolase activity	GO:0009056//catabolic process;GO:0044237//cellular metabolic process;GO:0019538//protein metabolic process;GO:0071704//organic substance metabolic process;GO:0044267//cellular protein metabolic process;GO:0051603//proteolysis involved in cellular protein catabolic process;GO:0044248//cellular catabolic process;GO:0008152//metabolic process;GO:0019941//modification-dependent protein catabolic proc…
BnaA01g05170D	5.66667	1.66667	0.35	0.0933333	6	1.33333	0.413333	0.0833333	-1.90689	0.0732585	-2.31034	0.0385167	BnaA01g05170D [Brassica napus]	-	-	-	-	-	-	-
BnaA01g05230D	108.597	45.1833	4.75333	1.81	104.53	47.6667	5.11333	2.11	-1.39295	3.78e-06	-1.27702	0.000234587	BnaA01g05230D [Brassica napus]	-	-	-	-	GO:0043226//organelle;GO:0043229//intracellular organelle;GO:0043227//membrane-bounded organelle;GO:0005622//intracellular;GO:0044424//intracellular part;GO:0044464//cell part;GO:0005623//cell;GO:0043231//intracellular membrane-bounded organelle	GO:0001071//nucleic acid binding transcription factor activity;GO:0005488//binding;GO:0003676//nucleic acid binding;GO:0097159//organic cyclic compound binding;GO:1901363//heterocyclic compound binding	GO:0006725//cellular aromatic compound metabolic process;GO:0019438//aromatic compound biosynthetic process;GO:0006351//transcription, DNA-templated;GO:0032774//RNA biosynthetic process;GO:0006807//nitrogen compound metabolic process;GO:0044249//cellular biosynthetic process;GO:0009059//macromolecule biosynthetic process;GO:0018130//heterocycle biosynthetic process;GO:0008152//metabolic process;G…
BnaA01g05240D	532.59	244.927	8.75	3.69667	452.91	530.17	8.23667	9.13333	-1.24306	4.6e-06	0.149081	0.767365	BnaA01g05240D [Brassica napus]	-	-	-	-	GO:0044464//cell part;GO:0043228//non-membrane-bounded organelle;GO:0043229//intracellular organelle;GO:0044424//intracellular part;GO:0005875//microtubule associated complex;GO:0032991//macromolecular complex;GO:0044446//intracellular organelle part;GO:0005622//intracellular;GO:0044422//organelle part;GO:0015630//microtubule cytoskeleton;GO:0043234//protein complex;GO:0043226//organelle;GO:00432…	GO:0043168//anion binding;GO:0016462//pyrophosphatase activity;GO:0005524//ATP binding;GO:0030554//adenyl nucleotide binding;GO:1901265//nucleoside phosphate binding;GO:0003777//microtubule motor activity;GO:0032550//purine ribonucleoside binding;GO:0016817//hydrolase activity, acting on acid anhydrides;GO:0032553//ribonucleotide binding;GO:0017111//nucleoside-triphosphatase activity;GO:0001883//…	GO:0044699//single-organism process;GO:0007017//microtubule-based process;GO:0006928//movement of cell or subcellular component;GO:0044763//single-organism cellular process;GO:0007018//microtubule-based movement;GO:0009987//cellular process
BnaA01g05290D	2.45667	0	0.213333	0.001	3.33333	0	0.32	0.001	-7.73697	0.0403684	-8.32193	0.0237133	BnaA01g05290D [Brassica napus]	-	-	-	-	GO:0044464//cell part;GO:0005623//cell;GO:0005622//intracellular	GO:0046914//transition metal ion binding;GO:0043167//ion binding;GO:0043169//cation binding;GO:0005488//binding;GO:0046872//metal ion binding;GO:0008270//zinc ion binding	-
BnaA01g05370D	169.667	275.667	5.09	7.62333	111.667	306	3.75667	9.56333	0.582756	0.0239291	1.34806	1.28451e-06	BnaA01g05370D [Brassica napus]	-	-	-	-	-	GO:0005515//protein binding;GO:0043167//ion binding;GO:0043169//cation binding;GO:0046914//transition metal ion binding;GO:0046872//metal ion binding;GO:0005488//binding;GO:0008270//zinc ion binding	GO:0043207//response to external biotic stimulus;GO:0050896//response to stimulus;GO:0051704//multi-organism process;GO:0009608//response to symbiont;GO:0051707//response to other organism;GO:0009607//response to biotic stimulus;GO:0009605//response to external stimulus
BnaA01g05450D	183.91	81.34	2.71667	1.09333	178.293	125.793	2.89	1.85667	-1.3131	0.000129759	-0.638355	0.116061	BnaA01g05450D [Brassica napus]	-	-	-	-	GO:0016020//membrane	GO:0005488//binding;GO:0016758//transferase activity, transferring hexosyl groups;GO:0046527//glucosyltransferase activity;GO:0016757//transferase activity, transferring glycosyl groups;GO:0043167//ion binding;GO:0016759//cellulose synthase activity;GO:0008194//UDP-glycosyltransferase activity;GO:0003824//catalytic activity;GO:0046914//transition metal ion binding;GO:0016760//cellulose synthase (…	GO:1901657//glycosyl compound metabolic process;GO:0044710//single-organism metabolic process;GO:0000003//reproduction;GO:0016144//S-glycoside biosynthetic process;GO:0044281//small molecule metabolic process;GO:0030243//cellulose metabolic process;GO:0071840//cellular component organization or biogenesis;GO:0051273//beta-glucan metabolic process;GO:0044085//cellular component biogenesis;GO:00302…
BnaA01g05490D	398.443	134.953	6.76	2.07	317.007	193.09	5.90667	3.22667	-1.70739	5.77e-10	-0.8723	0.0116978	BnaA01g05490D [Brassica napus]	Environmental Information Processing	Signal transduction	ko04075//Plant hormone signal transduction	K13415	GO:0044424//intracellular part;GO:0005623//cell;GO:0043226//organelle;GO:0043229//intracellular organelle;GO:0043231//intracellular membrane-bounded organelle;GO:0005622//intracellular;GO:0032991//macromolecular complex;GO:0044464//cell part;GO:0016020//membrane;GO:0043227//membrane-bounded organelle	GO:0005488//binding;GO:0016773//phosphotransferase activity, alcohol group as acceptor;GO:0097367//carbohydrate derivative binding;GO:0043167//ion binding;GO:1901363//heterocyclic compound binding;GO:0046983//protein dimerization activity;GO:0005515//protein binding;GO:0035639//purine ribonucleoside triphosphate binding;GO:0032549//ribonucleoside binding;GO:0005524//ATP binding;GO:0032555//purine…	GO:0044700//single organism signaling;GO:0065008//regulation of biological quality;GO:0051606//detection of stimulus;GO:0065007//biological regulation;GO:0048731//system development;GO:0009593//detection of chemical stimulus;GO:0043170//macromolecule metabolic process;GO:2000026//regulation of multicellular organismal development;GO:0009791//post-embryonic development;GO:0043401//steroid hormone …
BnaA01g05500D	1.66667	3	0.1	0.173333	8.33333	0.666667	0.566667	0.05	0.793549	0.724681	-3.5025	0.0016278	PREDICTED: probable WRKY transcription factor 13 [Brassica rapa]	-	-	-	-	GO:0043227//membrane-bounded organelle;GO:0044464//cell part;GO:0005622//intracellular;GO:0044424//intracellular part;GO:0043229//intracellular organelle;GO:0005623//cell;GO:0043231//intracellular membrane-bounded organelle;GO:0043226//organelle	GO:0097159//organic cyclic compound binding;GO:0003676//nucleic acid binding;GO:0043565//sequence-specific DNA binding;GO:1901363//heterocyclic compound binding;GO:0001071//nucleic acid binding transcription factor activity;GO:0003677//DNA binding;GO:0003700//transcription factor activity, sequence-specific DNA binding;GO:0005488//binding	GO:0006807//nitrogen compound metabolic process;GO:0034641//cellular nitrogen compound metabolic process;GO:0009987//cellular process;GO:0044260//cellular macromolecule metabolic process;GO:1901362//organic cyclic compound biosynthetic process;GO:1901576//organic substance biosynthetic process;GO:0006725//cellular aromatic compound metabolic process;GO:0034645//cellular macromolecule biosynthetic…
BnaA01g05620D	128.603	37.9467	4.94	1.34	137.703	16.7267	5.83	0.636667	-1.88228	3.04e-08	-3.19489	2.51569e-17	BnaA01g05620D [Brassica napus]	-	-	-	-	-	-	GO:0022414//reproductive process;GO:0032502//developmental process;GO:0003006//developmental process involved in reproduction;GO:0000003//reproduction
BnaA01g05660D	282.043	222.803	8.52	6.12	266.793	127.87	8.91667	3.97667	-0.477322	0.0608608	-1.16494	4.83295e-05	BnaA01g05660D [Brassica napus]	Metabolism	Lipid metabolism;Global and Overview;Metabolism of other amino acids	ko01100//Metabolic pathways;ko00480//Glutathione metabolism;ko00460//Cyanoamino acid metabolism;ko00430//Taurine and hypotaurine metabolism;ko00590//Arachidonic acid metabolism	K18592	-	GO:0016740//transferase activity;GO:0003840//gamma-glutamyltransferase activity;GO:0003824//catalytic activity;GO:0016755//transferase activity, transferring amino-acyl groups;GO:0016746//transferase activity, transferring acyl groups	GO:0034641//cellular nitrogen compound metabolic process;GO:0044237//cellular metabolic process;GO:0006518//peptide metabolic process;GO:0006575//cellular modified amino acid metabolic process;GO:0006790//sulfur compound metabolic process;GO:0006807//nitrogen compound metabolic process;GO:0006749//glutathione metabolic process;GO:1901564//organonitrogen compound metabolic process;GO:0071704//orga…
BnaA01g05670D	600.463	246.44	18.91	7.07	600.797	341.59	21.0267	11.1533	-1.41937	3.01e-10	-0.914745	0.000737317	PREDICTED: alanine--glyoxylate aminotransferase 2 homolog 1, mitochondrial-like [Brassica rapa]	Metabolism	Global and Overview;Amino acid metabolism	ko01100//Metabolic pathways;ko01110//Biosynthesis of secondary metabolites;ko00270//Cysteine and methionine metabolism;ko00260//Glycine, serine and threonine metabolism;ko00250//Alanine, aspartate and glutamate metabolism;ko00280//Valine, leucine and isoleucine degradation	K00827	-	GO:0005488//binding;GO:0008483//transaminase activity;GO:0048037//cofactor binding;GO:0097159//organic cyclic compound binding;GO:0043168//anion binding;GO:1901363//heterocyclic compound binding;GO:0016740//transferase activity;GO:0043167//ion binding;GO:0030170//pyridoxal phosphate binding;GO:0016769//transferase activity, transferring nitrogenous groups;GO:0003824//catalytic activity	-
BnaA01g05690D	221.587	113.767	5.78333	2.69	188.39	98.18	5.46333	2.62	-1.1043	4.46e-05	-1.06021	0.000284666	BnaA01g05690D [Brassica napus]	Genetic Information Processing	Transcription;Translation	ko03040//Spliceosome;ko03013//RNA transport;ko03015//mRNA surveillance pathway	K12875	GO:0009536//plastid;GO:0005737//cytoplasm;GO:0044424//intracellular part;GO:0044464//cell part;GO:0043231//intracellular membrane-bounded organelle;GO:0044444//cytoplasmic part;GO:0005623//cell;GO:0043229//intracellular organelle;GO:0043227//membrane-bounded organelle;GO:0005622//intracellular;GO:0043226//organelle	GO:0003676//nucleic acid binding;GO:0005488//binding;GO:1901363//heterocyclic compound binding;GO:0097159//organic cyclic compound binding	GO:0044237//cellular metabolic process;GO:0043170//macromolecule metabolic process;GO:0031323//regulation of cellular metabolic process;GO:0006996//organelle organization;GO:0044260//cellular macromolecule metabolic process;GO:0051253//negative regulation of RNA metabolic process;GO:0010468//regulation of gene expression;GO:0050789//regulation of biological process;GO:0006139//nucleobase-containi…
BnaA01g05720D	769.287	215.53	43.2233	11.1933	674.227	212.637	42.19	12.2733	-1.94917	1.94e-15	-1.78137	4.42579e-09	BnaA01g05720D [Brassica napus]	-	-	-	-	-	-	GO:0009987//cellular process;GO:0006457//protein folding
BnaA01g05770D	10	2	0.256667	0.0466667	11.3333	4.87333	0.33	0.123333	-2.45943	0.0121414	-1.4199	0.0973439	BnaA01g05770D [Brassica napus]	-	-	-	-	-	-	-
BnaA01g05810D	80.6333	37.4833	2.45667	1.04333	60.7767	39.25	2.05667	1.21333	-1.2355	0.000171499	-0.761332	0.066762	BnaA01g05810D [Brassica napus]	-	-	-	-	-	-	-
BnaA01g05830D	34.54	86.36	1.32333	3.01667	86.6667	64.7767	3.68333	2.58	1.18878	0.00240573	-0.513641	0.241512	BnaA01g05830D [Brassica napus]	-	-	-	-	GO:0044424//intracellular part;GO:0043227//membrane-bounded organelle;GO:0043226//organelle;GO:0005622//intracellular;GO:0005623//cell;GO:0043231//intracellular membrane-bounded organelle;GO:0044464//cell part;GO:0043229//intracellular organelle	-	GO:0051641//cellular localization;GO:0046907//intracellular transport;GO:0045184//establishment of protein localization;GO:0043436//oxoacid metabolic process;GO:0044763//single-organism cellular process;GO:1902589//single-organism organelle organization;GO:0009416//response to light stimulus;GO:0006810//transport;GO:0070727//cellular macromolecule localization;GO:0016054//organic acid catabolic p…
BnaA01g05860D	1.33333	6.33333	0.13	0.523333	4.66667	2.66667	0.48	0.28	2.00922	0.0464646	-0.777608	0.542258	PREDICTED: flowering-promoting factor 1-like protein 1 [Brassica rapa]	-	-	-	-	GO:0005623//cell;GO:0044424//intracellular part;GO:0043227//membrane-bounded organelle;GO:0043229//intracellular organelle;GO:0005622//intracellular;GO:0043231//intracellular membrane-bounded organelle;GO:0044464//cell part;GO:0043226//organelle	-	-
BnaA01g05890D	58	6.33333	3.63	0.356667	96	8.33333	6.61	0.503333	-3.34732	8.7e-14	-3.71506	7.29334e-10	PREDICTED: selenoprotein H-like [Brassica napus]	-	-	-	-	-	GO:0008430//selenium binding;GO:0005488//binding	GO:0019725//cellular homeostasis;GO:0042592//homeostatic process;GO:0044763//single-organism cellular process;GO:0044699//single-organism process;GO:0050789//regulation of biological process;GO:0065007//biological regulation;GO:0009987//cellular process;GO:0045454//cell redox homeostasis;GO:0065008//regulation of biological quality;GO:0050794//regulation of cellular process
BnaA01g05900D	126.67	79.7233	4.23667	2.41	156.967	21.3567	5.83333	0.746667	-0.813896	0.00952289	-2.96578	1.03364e-16	BnaC01g07150D [Brassica napus]	-	-	-	-	GO:0016020//membrane	GO:0016740//transferase activity;GO:0008194//UDP-glycosyltransferase activity;GO:0016757//transferase activity, transferring glycosyl groups;GO:0016758//transferase activity, transferring hexosyl groups;GO:0008375//acetylglucosaminyltransferase activity;GO:0003824//catalytic activity	-
BnaA01g05990D	152.293	69.9667	2.42	1	292.69	103.933	5.14667	1.71	-1.27501	7.5e-06	-1.58964	2.87336e-08	BnaA01g05990D [Brassica napus]	-	-	-	-	GO:0043228//non-membrane-bounded organelle;GO:0043226//organelle;GO:0043232//intracellular non-membrane-bounded organelle;GO:0005623//cell;GO:0044464//cell part;GO:0005622//intracellular;GO:0043229//intracellular organelle;GO:0044424//intracellular part;GO:0005694//chromosome	GO:0005488//binding;GO:0003676//nucleic acid binding;GO:0003916//DNA topoisomerase activity;GO:0003824//catalytic activity;GO:0097159//organic cyclic compound binding;GO:0016853//isomerase activity;GO:0003917//DNA topoisomerase type I activity;GO:1901363//heterocyclic compound binding;GO:0003677//DNA binding	GO:1901360//organic cyclic compound metabolic process;GO:0071103//DNA conformation change;GO:0006139//nucleobase-containing compound metabolic process;GO:0043170//macromolecule metabolic process;GO:0006725//cellular aromatic compound metabolic process;GO:0006807//nitrogen compound metabolic process;GO:0071840//cellular component organization or biogenesis;GO:0051276//chromosome organization;GO:00…
BnaA01g06030D	153	4651.2	3.92	107.903	92.6667	2020.26	2.63333	54.44	4.78274	1.99e-72	4.36971	2.45315e-34	PREDICTED: glucan endo-1,3-beta-glucosidase 5-like [Brassica napus]	-	-	-	-	GO:0071944//cell periphery;GO:0016020//membrane;GO:0005618//cell wall;GO:0005911//cell-cell junction;GO:0043226//organelle;GO:0044425//membrane part;GO:0043229//intracellular organelle;GO:0031225//anchored component of membrane;GO:0005623//cell;GO:0030312//external encapsulating structure;GO:0043231//intracellular membrane-bounded organelle;GO:0043227//membrane-bounded organelle;GO:0031224//intri…	GO:0003824//catalytic activity	GO:0005975//carbohydrate metabolic process;GO:0044238//primary metabolic process;GO:0008152//metabolic process;GO:0071704//organic substance metabolic process
BnaA01g06040D	361.333	138	23.34	8.18	260.333	89.8067	18.7433	5.98	-1.51263	5.75e-10	-1.64816	1.59417e-08	BnaC01g07300D [Brassica napus]	-	-	-	-	GO:0016020//membrane	-	-
BnaA01g06090D	2.33333	1	0.0933333	0.0366667	8.66667	2	0.396667	0.0833333	-1.34792	0.6085	-2.25096	0.0104063	BnaA01g06090D [Brassica napus]	Metabolism	Global and Overview;Metabolism of cofactors and vitamins	ko01100//Metabolic pathways;ko00785//Lipoic acid metabolism	K03801	GO:0044424//intracellular part;GO:0005622//intracellular;GO:0005737//cytoplasm;GO:0005623//cell;GO:0044464//cell part	GO:0016747//transferase activity, transferring acyl groups other than amino-acyl groups;GO:0016415//octanoyltransferase activity;GO:0016740//transferase activity;GO:0001071//nucleic acid binding transcription factor activity;GO:0003676//nucleic acid binding;GO:0003700//transcription factor activity, sequence-specific DNA binding;GO:0005488//binding;GO:0016746//transferase activity, transferring a…	GO:0018130//heterocycle biosynthetic process;GO:0044249//cellular biosynthetic process;GO:0044267//cellular protein metabolic process;GO:1901360//organic cyclic compound metabolic process;GO:0044272//sulfur compound biosynthetic process;GO:0072330//monocarboxylic acid biosynthetic process;GO:0046483//heterocycle metabolic process;GO:0006633//fatty acid biosynthetic process;GO:0044281//small molec…
BnaA01g06100D	191.54	86.3333	6.05667	2.50333	280.83	88.4733	9.94667	2.85667	-1.27467	3.06e-07	-1.79988	2.00292e-08	BnaA01g06100D [Brassica napus]	-	-	-	-	GO:0016021//integral component of membrane;GO:0044425//membrane part;GO:0016020//membrane;GO:0031224//intrinsic component of membrane	-	-
BnaA01g06110D	3	0	0.196667	0.001	6.33333	0.666667	0.456667	0.04	-7.61961	0.0286947	-3.51307	0.00790043	BnaA01g06110D [Brassica napus]	-	-	-	-	-	-	-
BnaA01g06120D	1.33333	181.333	0.04	5.16333	3	78.6867	0.0966667	2.55333	7.01216	1.74e-45	4.72322	5.43561e-16	BnaA01g06120D [Brassica napus]	-	-	-	-	-	-	-
BnaA01g06130D	182.333	523.783	12.9633	33.7867	141.907	273.883	11.1267	20.1	1.38202	4.65e-09	0.853174	0.00574887	ubiquitin-associated protein (DUF1068) [Arabidopsis thaliana]	-	-	-	-	-	-	GO:0006807//nitrogen compound metabolic process;GO:0044238//primary metabolic process;GO:0006396//RNA processing;GO:0009058//biosynthetic process;GO:0000096//sulfur amino acid metabolic process;GO:0016070//RNA metabolic process;GO:0046394//carboxylic acid biosynthetic process;GO:0006139//nucleobase-containing compound metabolic process;GO:0000097//sulfur amino acid biosynthetic process;GO:0016053…
BnaA01g06160D	82	36.3333	4.30333	1.74333	94.55	29.9067	5.47	1.61333	-1.30361	0.000826349	-1.7615	1.00981e-05	BnaA01g06160D [Brassica napus]	-	-	-	-	GO:0044464//cell part;GO:0005623//cell;GO:0043229//intracellular organelle;GO:0044424//intracellular part;GO:0005737//cytoplasm;GO:0009536//plastid;GO:0043226//organelle;GO:0005622//intracellular;GO:0044444//cytoplasmic part;GO:0043227//membrane-bounded organelle;GO:0043231//intracellular membrane-bounded organelle	-	-
BnaA01g06170D	12.18	2.37	0.57	0.1	25.5067	19.6333	1.29667	0.883333	-2.51096	0.00225408	-0.553778	0.574155	BnaA01g06170D [Brassica napus]	-	-	-	-	-	GO:0046983//protein dimerization activity;GO:0005515//protein binding;GO:0005488//binding	-
BnaA01g06230D	14.5067	9.52	1.73667	1.04333	21.64	8.16333	2.91333	1.01333	-0.735121	0.265182	-1.52356	0.0183447	BnaA01g06230D [Brassica napus]	-	-	-	-	-	-	-
BnaA01g06240D	77.56	26.4433	5.94333	1.86	68.6733	29.64	5.93667	2.3	-1.67597	2.7e-06	-1.36802	0.00198213	BnaA01g06240D [Brassica napus]	-	-	-	-	-	-	-
BnaA01g06270D	11	40.49	0.54	1.77667	18	45.79	0.95	2.16	1.71814	0.00304092	1.18503	0.0205652	BnaA01g06270D [Brassica napus]	-	-	-	-	GO:0031224//intrinsic component of membrane;GO:0044425//membrane part;GO:0016020//membrane;GO:0016021//integral component of membrane	-	-
BnaA01g06300D	2.33333	115	0.153333	6.62333	1.66667	147.333	0.11	9.96667	5.43281	5.3e-18	6.50154	2.61133e-25	BnaA01g06300D [Brassica napus]	-	-	-	-	GO:0043231//intracellular membrane-bounded organelle;GO:0005622//intracellular;GO:0005623//cell;GO:0043229//intracellular organelle;GO:0044464//cell part;GO:0044424//intracellular part;GO:0043227//membrane-bounded organelle;GO:0043226//organelle	-	-
BnaA01g06310D	153.137	31.81	3.31667	0.64	118.483	59.25	2.81667	1.28667	-2.37359	2.56e-10	-1.13035	0.00533402	BnaA01g06310D [Brassica napus]	-	-	-	-	GO:0005622//intracellular;GO:0005623//cell;GO:0043231//intracellular membrane-bounded organelle;GO:0043227//membrane-bounded organelle;GO:0043226//organelle;GO:0044464//cell part;GO:0043229//intracellular organelle;GO:0044424//intracellular part;GO:0005634//nucleus	GO:0005488//binding;GO:0005515//protein binding	GO:0006725//cellular aromatic compound metabolic process;GO:0044699//single-organism process;GO:1901360//organic cyclic compound metabolic process;GO:0044260//cellular macromolecule metabolic process;GO:0044238//primary metabolic process;GO:0071704//organic substance metabolic process;GO:0044763//single-organism cellular process;GO:0043170//macromolecule metabolic process;GO:0016070//RNA metaboli…
BnaA01g06330D	874.543	225.483	26.95	6.36	584.9	212.03	19.9367	6.58667	-2.08319	6.52e-19	-1.5978	6.31095e-09	BnaA01g06330D [Brassica napus]	-	-	-	-	-	GO:0004180//carboxypeptidase activity;GO:0008236//serine-type peptidase activity;GO:0016787//hydrolase activity;GO:0008238//exopeptidase activity;GO:0017171//serine hydrolase activity;GO:0070011//peptidase activity, acting on L-amino acid peptides;GO:0070008//serine-type exopeptidase activity;GO:0003824//catalytic activity;GO:0008233//peptidase activity;GO:0004185//serine-type carboxypeptidase ac…	GO:0044238//primary metabolic process;GO:0019538//protein metabolic process;GO:0071704//organic substance metabolic process;GO:0043170//macromolecule metabolic process;GO:0008152//metabolic process;GO:0006508//proteolysis
BnaA01g06340D	239.657	66.2467	3.82667	0.976667	271.393	152.11	4.82667	2.46	-1.97015	3.97e-12	-0.972369	0.000706861	BnaA01g06340D [Brassica napus]	-	-	-	-	GO:0005911//cell-cell junction;GO:0030054//cell junction	-	GO:0006914//autophagy;GO:0009987//cellular process
BnaA01g06350D	245.283	456.453	6.69333	11.52	607.363	325.99	18.7033	9.33667	0.783344	0.00239613	-1.00232	0.000480241	BnaC01g07600D [Brassica napus]	-	-	-	-	GO:0043227//membrane-bounded organelle;GO:0043231//intracellular membrane-bounded organelle;GO:0043226//organelle;GO:0005622//intracellular;GO:0043229//intracellular organelle;GO:0044464//cell part;GO:0005623//cell;GO:0044424//intracellular part	-	-
BnaA01g06370D	135.6	423	1.91667	5.42667	52.6667	234.667	0.83	3.36333	1.50147	3.34e-10	2.01871	6.92036e-11	BnaA01g06370D [Brassica napus]	-	-	-	-	-	GO:0005515//protein binding;GO:0005488//binding	-
BnaA01g06410D	1	27	0.06	1.38333	0	9.33333	0.001	0.54	4.52704	5.5e-08	9.07682	0.000172514	PREDICTED: E3 ubiquitin-protein ligase RING1-like [Brassica rapa]	-	-	-	-	-	GO:0008270//zinc ion binding;GO:0005488//binding;GO:0046872//metal ion binding;GO:0005515//protein binding;GO:0043169//cation binding;GO:0043167//ion binding;GO:0046914//transition metal ion binding	-
BnaA01g06440D	2248.65	1629.92	123.933	81.8167	75.5333	637.643	4.34	34.6967	-0.599098	0.0160725	2.99903	0.0115888	BnaA01g06440D [Brassica napus]	-	-	-	-	-	-	-
BnaA01g06460D	82.03	106.29	2.61333	3.11333	50.0267	115.957	1.76	3.71	0.252569	0.524482	1.07584	0.0043796	BnaA01g06460D [Brassica napus]	Genetic Information Processing	Translation	ko03013//RNA transport	K03260	-	GO:0005488//binding;GO:0003676//nucleic acid binding;GO:0003723//RNA binding;GO:1901363//heterocyclic compound binding;GO:0003677//DNA binding;GO:0005515//protein binding;GO:0097159//organic cyclic compound binding	GO:0006725//cellular aromatic compound metabolic process;GO:0034641//cellular nitrogen compound metabolic process;GO:0044237//cellular metabolic process;GO:0006807//nitrogen compound metabolic process;GO:0044238//primary metabolic process;GO:0009987//cellular process;GO:0006139//nucleobase-containing compound metabolic process;GO:0090304//nucleic acid metabolic process;GO:0046483//heterocycle met…
BnaA01g06520D	188.523	92	11.1333	4.96333	240.68	140	15.89	8.55667	-1.1655	7.97e-05	-0.892998	0.00241638	BnaC01g07790D [Brassica napus]	-	-	-	-	-	-	-
BnaA01g06530D	856.167	2094.63	22.0433	49.0567	1423.77	2017.72	40.79	53.6867	1.15411	1.16e-06	0.396348	0.163367	PREDICTED: signal recognition particle receptor subunit alpha [Brassica rapa]	Genetic Information Processing	Folding, sorting and degradation	ko03060//Protein export	K13431	GO:0048500//signal recognition particle;GO:0030867//rough endoplasmic reticulum membrane;GO:0044424//intracellular part;GO:0032991//macromolecular complex;GO:0005785//signal recognition particle receptor complex;GO:0005623//cell;GO:0043227//membrane-bounded organelle;GO:0098588//bounding membrane of organelle;GO:0043234//protein complex;GO:0044444//cytoplasmic part;GO:0005791//rough endoplasmic r…	GO:0001883//purine nucleoside binding;GO:0016818//hydrolase activity, acting on acid anhydrides, in phosphorus-containing anhydrides;GO:0016817//hydrolase activity, acting on acid anhydrides;GO:0043168//anion binding;GO:0000166//nucleotide binding;GO:0097159//organic cyclic compound binding;GO:0003924//GTPase activity;GO:0019001//guanyl nucleotide binding;GO:0032553//ribonucleotide binding;GO:000…	GO:0008104//protein localization;GO:0072594//establishment of protein localization to organelle;GO:0033036//macromolecule localization;GO:0070972//protein localization to endoplasmic reticulum;GO:1902578//single-organism localization;GO:0090150//establishment of protein localization to membrane;GO:0045184//establishment of protein localization;GO:0072657//protein localization to membrane;GO:00610…
BnaA01g06540D	413.43	1421.81	22.6333	71.11	8081.3	6299.9	498.24	351.677	1.6516	2.66e-10	-0.502591	0.123443	BnaA01g06540D [Brassica napus]	-	-	-	-	-	-	-
BnaA01g06550D	4	0.333333	0.24	0.02	0	0	0.001	0.001	-3.58496	0.0437058	0	1	BnaA01g06550D [Brassica napus]	-	-	-	-	-	GO:1901265//nucleoside phosphate binding;GO:0032555//purine ribonucleotide binding;GO:0032550//purine ribonucleoside binding;GO:0016773//phosphotransferase activity, alcohol group as acceptor;GO:1901363//heterocyclic compound binding;GO:0001883//purine nucleoside binding;GO:0097159//organic cyclic compound binding;GO:0005524//ATP binding;GO:0004674//protein serine/threonine kinase activity;GO:000…	GO:0006468//protein phosphorylation;GO:0044238//primary metabolic process;GO:0006796//phosphate-containing compound metabolic process;GO:0019538//protein metabolic process;GO:0036211//protein modification process;GO:0016310//phosphorylation;GO:0006464//cellular protein modification process;GO:0044260//cellular macromolecule metabolic process;GO:0043170//macromolecule metabolic process;GO:0044267/…
BnaA01g06570D	6.03	0	0.443333	0.001	14.6733	2.66667	1.18	0.203333	-8.79225	0.000804579	-2.53687	0.00749343	BnaA01g06570D [Brassica napus]	-	-	-	-	GO:0043227//membrane-bounded organelle;GO:0043226//organelle;GO:0044464//cell part;GO:0043229//intracellular organelle;GO:0044424//intracellular part;GO:0005623//cell;GO:0005622//intracellular;GO:0043231//intracellular membrane-bounded organelle	-	GO:0044248//cellular catabolic process;GO:0044238//primary metabolic process;GO:0044267//cellular protein metabolic process;GO:0009056//catabolic process;GO:0019941//modification-dependent protein catabolic process;GO:0044260//cellular macromolecule metabolic process;GO:0071704//organic substance metabolic process;GO:0022607//cellular component assembly;GO:0030163//protein catabolic process;GO:00…
BnaA01g06600D	9.66667	195.333	0.753333	13.4367	19.3333	160.307	1.63333	12.44	4.15674	1.97e-29	2.9291	3.22506e-16	BnaA01g06600D [Brassica napus]	-	-	-	-	-	-	-
BnaA01g06680D	52.0967	102.947	1.21333	2.18333	222.667	104.873	5.73667	2.47667	0.847556	0.010189	-1.21181	0.00013352	PREDICTED: chaperone protein ClpB1-like [Brassica napus]	-	-	-	-	-	-	-
BnaA01g06700D	319.947	32.67	9.4	0.87	438.937	125.58	14.3333	3.59333	-3.43357	2.89e-33	-1.99598	2.19107e-06	PREDICTED: diacylglycerol kinase 7 [Brassica rapa]	Metabolism;Environmental Information Processing	Global and Overview;Signal transduction;Lipid metabolism	ko01100//Metabolic pathways;ko01110//Biosynthesis of secondary metabolites;ko00564//Glycerophospholipid metabolism;ko04070//Phosphatidylinositol signaling system;ko00561//Glycerolipid metabolism	K00901	-	GO:0016740//transferase activity;GO:0016773//phosphotransferase activity, alcohol group as acceptor;GO:0004143//diacylglycerol kinase activity;GO:0016772//transferase activity, transferring phosphorus-containing groups;GO:0003824//catalytic activity;GO:0016301//kinase activity	GO:0009987//cellular process;GO:0007186//G-protein coupled receptor signaling pathway;GO:0044763//single-organism cellular process;GO:0050896//response to stimulus;GO:0044699//single-organism process;GO:0007205//protein kinase C-activating G-protein coupled receptor signaling pathway;GO:0007165//signal transduction;GO:0050789//regulation of biological process;GO:0051716//cellular response to stim…
BnaA01g06750D	37.26	145.743	1.87	6.67	32.02	216.997	1.74667	10.93	1.83465	1.05e-07	2.64562	3.99546e-09	PREDICTED: xyloglucan endotransglucosylase/hydrolase protein 24 [Brassica rapa]	-	-	-	-	GO:0030312//external encapsulating structure;GO:0044464//cell part;GO:0005618//cell wall;GO:0005623//cell;GO:0048046//apoplast;GO:0071944//cell periphery;GO:0005576//extracellular region	GO:0016762//xyloglucan:xyloglucosyl transferase activity;GO:0016740//transferase activity;GO:0016758//transferase activity, transferring hexosyl groups;GO:0016757//transferase activity, transferring glycosyl groups;GO:0003824//catalytic activity	GO:0071704//organic substance metabolic process;GO:0044042//glucan metabolic process;GO:0005976//polysaccharide metabolic process;GO:0006073//cellular glucan metabolic process;GO:0005975//carbohydrate metabolic process;GO:0043170//macromolecule metabolic process;GO:0044264//cellular polysaccharide metabolic process;GO:0044260//cellular macromolecule metabolic process;GO:0009987//cellular process;…
BnaA01g06760D	108.333	416.667	5.32	18.7133	171.363	142	9.36333	7.03333	1.81457	3.01e-13	-0.412814	0.291214	PREDICTED: protein YIPF6 homolog [Brassica napus]	-	-	-	-	GO:0016020//membrane	-	-
BnaA01g06770D	7.33333	18.8333	0.27	0.64	6	14.9033	0.253333	0.556667	1.24511	0.0362668	1.13578	0.173643	BnaA01g06770D [Brassica napus]	-	-	-	-	-	GO:0016817//hydrolase activity, acting on acid anhydrides;GO:0032549//ribonucleoside binding;GO:0017111//nucleoside-triphosphatase activity;GO:0001882//nucleoside binding;GO:0003824//catalytic activity;GO:0016462//pyrophosphatase activity;GO:0005524//ATP binding;GO:0032559//adenyl ribonucleotide binding;GO:0001883//purine nucleoside binding;GO:0032555//purine ribonucleotide binding;GO:0017076//pu…	-
BnaA01g06780D	206	328.667	8.73667	12.6467	134.333	349	6.34	14.74	0.533602	0.0412525	1.21718	0.000973718	BnaC01g08170D [Brassica napus]	-	-	-	-	GO:0016020//membrane	-	GO:0051234//establishment of localization;GO:1902582//single-organism intracellular transport;GO:0048193//Golgi vesicle transport;GO:1902578//single-organism localization;GO:0046907//intracellular transport;GO:0051641//cellular localization;GO:0051649//establishment of localization in cell;GO:0006810//transport;GO:0044699//single-organism process;GO:0051179//localization;GO:0044765//single-organi…
BnaA01g06790D	5.33333	9.33333	0.403333	0.666667	2	22.3333	0.163333	1.76667	0.724993	0.639477	3.43514	0.00030088	BnaC07g42470D [Brassica napus]	-	-	-	-	GO:0005622//intracellular;GO:0043229//intracellular organelle;GO:0043226//organelle;GO:0044424//intracellular part;GO:0043227//membrane-bounded organelle;GO:0043231//intracellular membrane-bounded organelle;GO:0005623//cell;GO:0044464//cell part	-	-
BnaA01g06800D	329.467	1747.75	7.40333	36.0267	909.797	732.623	22.9533	17.1533	2.28282	1.58e-17	-0.420215	0.157152	BnaA01g06800D [Brassica napus]	-	-	-	-	-	GO:0097159//organic cyclic compound binding;GO:0005488//binding;GO:0097367//carbohydrate derivative binding;GO:0005506//iron ion binding;GO:0048037//cofactor binding;GO:0046914//transition metal ion binding;GO:0046872//metal ion binding;GO:0010181//FMN binding;GO:1901265//nucleoside phosphate binding;GO:0036094//small molecule binding;GO:0003824//catalytic activity;GO:1901363//heterocyclic compou…	GO:0055114//oxidation-reduction process;GO:0044699//single-organism process;GO:0044710//single-organism metabolic process;GO:0008152//metabolic process
BnaA01g06810D	277.667	61.3333	7.20667	1.44	294.333	92	8.52667	2.39	-2.32326	6.15e-16	-1.83497	4.69259e-08	PREDICTED: VIN3-like protein 2 isoform X1 [Brassica napus]	-	-	-	-	GO:0043234//protein complex;GO:0005911//cell-cell junction;GO:0032991//macromolecular complex;GO:0030054//cell junction	GO:0005515//protein binding;GO:0042393//histone binding;GO:0005488//binding	GO:0051570//regulation of histone H3-K9 methylation;GO:0071822//protein complex subunit organization;GO:0007623//circadian rhythm;GO:0048572//short-day photoperiodism;GO:0090558//plant epidermis development;GO:0031060//regulation of histone methylation;GO:0031056//regulation of histone modification;GO:0033044//regulation of chromosome organization;GO:0009628//response to abiotic stimulus;GO:00485…
BnaA01g06830D	0	3.33333	0.001	0.163333	0	1.33333	0.001	0.0833333	7.35168	0.0357412	6.38082	0.405755	PREDICTED: peroxidase 45-like [Brassica napus]	Metabolism	Global and Overview;Biosynthesis of other secondary metabolites	ko01100//Metabolic pathways;ko01110//Biosynthesis of secondary metabolites;ko00940//Phenylpropanoid biosynthesis	K00430	-	GO:0020037//heme binding;GO:0005488//binding;GO:1901363//heterocyclic compound binding;GO:0016491//oxidoreductase activity;GO:0016684//oxidoreductase activity, acting on peroxide as acceptor;GO:0003824//catalytic activity;GO:0016209//antioxidant activity;GO:0004601//peroxidase activity;GO:0046906//tetrapyrrole binding;GO:0097159//organic cyclic compound binding	GO:0009987//cellular process;GO:0006950//response to stress;GO:0008152//metabolic process;GO:0006979//response to oxidative stress;GO:0009267//cellular response to starvation;GO:0051716//cellular response to stimulus;GO:0055114//oxidation-reduction process;GO:0006820//anion transport;GO:0071496//cellular response to external stimulus;GO:0006812//cation transport;GO:0001101//response to acid chemi…
BnaA01g06850D	285.077	142.733	3.80333	1.73333	297.293	174.413	4.39667	2.36667	-1.13372	2.72e-06	-0.893554	0.00312289	BnaA01g06850D [Brassica napus]	-	-	-	-	-	GO:0005515//protein binding;GO:0005488//binding;GO:0003779//actin binding;GO:0008092//cytoskeletal protein binding	GO:0009987//cellular process;GO:0007010//cytoskeleton organization;GO:0006996//organelle organization;GO:0016043//cellular component organization;GO:0071840//cellular component organization or biogenesis
BnaA01g06860D	147.667	17	1.47333	0.153333	143.333	24.6667	1.59	0.236667	-3.26434	9.41e-21	-2.7481	1.3349e-07	Urb2/Npa2 family protein [Arabidopsis thaliana]	-	-	-	-	-	-	-
BnaA01g06870D	4.66667	0	0.226667	0.001	4	0.333333	0.206667	0.02	-7.82443	0.0101958	-3.36923	0.0311843	BnaA01g06870D [Brassica napus]	-	-	-	-	GO:0005622//intracellular;GO:0044464//cell part;GO:0043231//intracellular membrane-bounded organelle;GO:0005623//cell;GO:0044424//intracellular part;GO:0043229//intracellular organelle;GO:0043226//organelle;GO:0043227//membrane-bounded organelle	-	GO:0035194//posttranscriptional gene silencing by RNA;GO:0009892//negative regulation of metabolic process;GO:0006807//nitrogen compound metabolic process;GO:0031324//negative regulation of cellular metabolic process;GO:0009890//negative regulation of biosynthetic process;GO:0002376//immune system process;GO:0010033//response to organic substance;GO:0051253//negative regulation of RNA metabolic p…
BnaA01g06900D	0	6.66667	0.001	0.236667	1	3	0.0433333	0.116667	7.88671	0.00274364	1.42884	0.54534	golgin family A protein [Arabidopsis thaliana]	-	-	-	-	-	-	-
BnaA01g06940D	670.533	66.3767	14.7033	1.33	461.997	52.6967	11.2833	1.16	-3.46665	7.9e-35	-3.282	1.91963e-14	PREDICTED: subtilisin-like protease SBT2.5 [Brassica napus]	-	-	-	-	GO:0030312//external encapsulating structure;GO:0005623//cell;GO:0016020//membrane;GO:0071944//cell periphery;GO:0005618//cell wall;GO:0044464//cell part	GO:0005515//protein binding;GO:0008236//serine-type peptidase activity;GO:0005488//binding;GO:0004175//endopeptidase activity;GO:0008233//peptidase activity;GO:0070011//peptidase activity, acting on L-amino acid peptides;GO:0004252//serine-type endopeptidase activity;GO:0016787//hydrolase activity;GO:0003824//catalytic activity;GO:0017171//serine hydrolase activity;GO:0042802//identical protein b…	GO:0009719//response to endogenous stimulus;GO:0007154//cell communication;GO:0050794//regulation of cellular process;GO:0044092//negative regulation of molecular function;GO:0032870//cellular response to hormone stimulus;GO:0044710//single-organism metabolic process;GO:0006996//organelle organization;GO:0007010//cytoskeleton organization;GO:0044699//single-organism process;GO:0006790//sulfur com…
BnaA01g06950D	0	0.333333	0.001	0.01	0	5	0.001	0.2	3.32193	1	7.64386	0.0407939	PREDICTED: molybdate transporter 1 [Brassica napus]	-	-	-	-	GO:0005623//cell;GO:0043226//organelle;GO:0016020//membrane;GO:0044464//cell part;GO:0043227//membrane-bounded organelle;GO:0043231//intracellular membrane-bounded organelle;GO:0044424//intracellular part;GO:0005622//intracellular;GO:0043229//intracellular organelle	GO:0005215//transporter activity;GO:0008509//anion transmembrane transporter activity;GO:0022892//substrate-specific transporter activity;GO:0015075//ion transmembrane transporter activity;GO:0015103//inorganic anion transmembrane transporter activity;GO:0022891//substrate-specific transmembrane transporter activity;GO:0022857//transmembrane transporter activity	GO:0051234//establishment of localization;GO:0006811//ion transport;GO:0051179//localization;GO:0044765//single-organism transport;GO:0044699//single-organism process;GO:0006820//anion transport;GO:0006810//transport;GO:0015698//inorganic anion transport;GO:1902578//single-organism localization
BnaA01g06970D	90.6667	2.66667	2.72667	0.0733333	61.3333	4	2.03667	0.12	-5.21653	9.81e-25	-4.0851	1.12574e-13	BnaA01g06970D [Brassica napus]	Metabolism	Metabolism of cofactors and vitamins;Global and Overview	ko01100//Metabolic pathways;ko00790//Folate biosynthesis	K13941	GO:0044464//cell part;GO:0044424//intracellular part;GO:0005623//cell;GO:0043227//membrane-bounded organelle;GO:0005622//intracellular;GO:0043231//intracellular membrane-bounded organelle;GO:0043229//intracellular organelle;GO:0043226//organelle	GO:0003848//2-amino-4-hydroxy-6-hydroxymethyldihydropteridine diphosphokinase activity;GO:0016740//transferase activity;GO:0016765//transferase activity, transferring alkyl or aryl (other than methyl) groups;GO:0016778//diphosphotransferase activity;GO:0016772//transferase activity, transferring phosphorus-containing groups;GO:0003824//catalytic activity;GO:0004156//dihydropteroate synthase activ…	GO:1901576//organic substance biosynthetic process;GO:0044763//single-organism cellular process;GO:0046394//carboxylic acid biosynthetic process;GO:0034641//cellular nitrogen compound metabolic process;GO:0019438//aromatic compound biosynthetic process;GO:1901566//organonitrogen compound biosynthetic process;GO:0008652//cellular amino acid biosynthetic process;GO:0044271//cellular nitrogen compou…
BnaA01g07000D	180.35	613.983	2.34	7.23	202.377	631.727	2.91	8.35333	1.62749	1.07e-10	1.52133	4.10924e-07	BnaA01g07000D [Brassica napus]	-	-	-	-	GO:0005622//intracellular;GO:0005623//cell;GO:0044464//cell part	GO:0008047//enzyme activator activity;GO:0030234//enzyme regulator activity;GO:0030695//GTPase regulator activity;GO:0005096//GTPase activator activity;GO:0060589//nucleoside-triphosphatase regulator activity;GO:0098772//molecular function regulator	GO:0065007//biological regulation;GO:0050789//regulation of biological process;GO:0065009//regulation of molecular function;GO:0050790//regulation of catalytic activity;GO:0043087//regulation of GTPase activity;GO:0051336//regulation of hydrolase activity;GO:0019222//regulation of metabolic process
BnaA01g07050D	75.1533	19.2433	3.58667	0.823333	142.71	81.7967	7.61667	3.94	-2.1231	5.1e-06	-0.950964	0.00836608	PREDICTED: UPF0725 protein At4g29550-like [Brassica napus]	-	-	-	-	-	-	-
BnaA01g07090D	16.3333	474	1.60667	41.2533	4.66667	226.333	0.493333	23.1833	4.68237	2.56e-23	5.55438	3.67963e-24	BnaC03g68210D [Brassica napus]	-	-	-	-	-	-	-
BnaA01g07100D	232.95	129.22	3.56333	1.78667	261.527	100.857	4.45667	1.59667	-0.995957	0.000144843	-1.4809	2.17381e-07	BnaA01g07100D [Brassica napus]	-	-	-	-	GO:0016020//membrane;GO:0016021//integral component of membrane;GO:0031224//intrinsic component of membrane;GO:0044425//membrane part	GO:0043168//anion binding;GO:0003824//catalytic activity;GO:0030554//adenyl nucleotide binding;GO:0097367//carbohydrate derivative binding;GO:0043492//ATPase activity, coupled to movement of substances;GO:0016887//ATPase activity;GO:0005215//transporter activity;GO:0015405//P-P-bond-hydrolysis-driven transmembrane transporter activity;GO:0022892//substrate-specific transporter activity;GO:0001883…	GO:0098660//inorganic ion transmembrane transport;GO:0006811//ion transport;GO:0098655//cation transmembrane transport;GO:0044765//single-organism transport;GO:0098662//inorganic cation transmembrane transport;GO:0006812//cation transport;GO:0006810//transport;GO:0070838//divalent metal ion transport;GO:0030001//metal ion transport;GO:0044763//single-organism cellular process;GO:0034220//ion tran…
BnaA01g07110D	44.3333	13.3333	3.26667	0.91	48.6667	15.6667	3.99667	1.15	-1.84388	8.25e-06	-1.79716	0.000131543	BnaA01g07110D [Brassica napus]	-	-	-	-	GO:0005622//intracellular;GO:0016020//membrane;GO:0005623//cell;GO:0043229//intracellular organelle;GO:0043231//intracellular membrane-bounded organelle;GO:0044464//cell part;GO:0043226//organelle;GO:0043227//membrane-bounded organelle;GO:0044424//intracellular part	-	GO:0044699//single-organism process;GO:0044237//cellular metabolic process;GO:0008152//metabolic process;GO:0044763//single-organism cellular process;GO:0009987//cellular process;GO:0019748//secondary metabolic process;GO:0009404//toxin metabolic process;GO:0044710//single-organism metabolic process
BnaA01g07120D	58	16.3333	2.33	0.596667	32.9667	23.7667	1.49333	0.99	-1.96533	2.15e-06	-0.593036	0.284664	PREDICTED: protein DECREASED SIZE EXCLUSION LIMIT 1 isoform X2 [Brassica napus]	-	-	-	-	-	GO:0005488//binding;GO:0005515//protein binding	-
BnaA01g07150D	87.6233	27.4267	4.65	1.32	81.5533	33.3333	4.77667	1.76333	-1.81669	4.34e-08	-1.4377	0.00143399	PREDICTED: WD repeat-containing protein VIP3-like [Brassica napus]	Genetic Information Processing	Folding, sorting and degradation	ko03018//RNA degradation	K12602	GO:0044424//intracellular part;GO:0009898//cytoplasmic side of plasma membrane;GO:0019898//extrinsic component of membrane;GO:0019897//extrinsic component of plasma membrane;GO:0005886//plasma membrane;GO:0031461//cullin-RING ubiquitin ligase complex;GO:0016020//membrane;GO:0071944//cell periphery;GO:0098552//side of membrane;GO:0044444//cytoplasmic part;GO:0044464//cell part;GO:0044425//membrane…	GO:0005515//protein binding;GO:0005488//binding	GO:0048731//system development;GO:0018205//peptidyl-lysine modification;GO:0044707//single-multicellular organism process;GO:0003006//developmental process involved in reproduction;GO:0034968//histone lysine methylation;GO:0044260//cellular macromolecule metabolic process;GO:0044267//cellular protein metabolic process;GO:0006996//organelle organization;GO:0022414//reproductive process;GO:0061458/…
BnaA01g07160D	152.667	41.6667	8.70667	2.16667	73.0567	27.3333	4.67	1.65667	-2.00664	1.42e-09	-1.49514	0.00195093	BnaA01g07160D [Brassica napus]	Genetic Information Processing	Translation	ko03015//mRNA surveillance pathway	K14397	GO:0044428//nuclear part;GO:0031974//membrane-enclosed lumen;GO:0032991//macromolecular complex;GO:0005634//nucleus;GO:0043234//protein complex;GO:0005849//mRNA cleavage factor complex;GO:0005623//cell;GO:0044464//cell part;GO:0044422//organelle part;GO:0031981//nuclear lumen;GO:0044446//intracellular organelle part;GO:0044451//nucleoplasm part;GO:0043231//intracellular membrane-bounded organelle…	GO:0003723//RNA binding;GO:0003676//nucleic acid binding;GO:0003824//catalytic activity;GO:0005488//binding;GO:0016787//hydrolase activity;GO:0003729//mRNA binding;GO:0044822//poly(A) RNA binding;GO:1901363//heterocyclic compound binding;GO:0097159//organic cyclic compound binding	GO:0044260//cellular macromolecule metabolic process;GO:0010467//gene expression;GO:0007568//aging;GO:0044767//single-organism developmental process;GO:0016070//RNA metabolic process;GO:0006725//cellular aromatic compound metabolic process;GO:0006397//mRNA processing;GO:0016071//mRNA metabolic process;GO:0034641//cellular nitrogen compound metabolic process;GO:0090304//nucleic acid metabolic proc…
BnaA01g07180D	0	35.1067	0.001	1.21333	0	12.3933	0.001	0.51	10.2448	6.99e-13	8.99435	8.37263e-06	BnaA01g07180D [Brassica napus]	-	-	-	-	-	-	GO:0071704//organic substance metabolic process;GO:0008152//metabolic process;GO:0044699//single-organism process;GO:0044710//single-organism metabolic process;GO:0044238//primary metabolic process;GO:0006629//lipid metabolic process
BnaA01g07190D	327.46	178	4.45	2.20333	287.92	156.68	4.36667	2.21	-1.01412	0.000206194	-0.982486	0.000485902	BnaA01g07190D [Brassica napus]	-	-	-	-	GO:0043231//intracellular membrane-bounded organelle;GO:0043229//intracellular organelle;GO:0043227//membrane-bounded organelle;GO:0044424//intracellular part;GO:0043226//organelle;GO:0005622//intracellular;GO:0044464//cell part;GO:0005623//cell	-	-
BnaA01g07240D	84.03	5	3.48	0.186667	90.4833	3.35667	4.22667	0.136667	-4.22055	1e-16	-4.95079	1.44792e-19	BnaA01g07240D [Brassica napus]	-	-	-	-	-	GO:0003824//catalytic activity	GO:0008152//metabolic process
BnaA01g07270D	294.26	824.967	9.93333	25.1333	584.607	998.753	21.89	34.1867	1.33925	1.19e-07	0.643162	0.029173	BnaA01g07270D [Brassica napus]	Metabolism	Nucleotide metabolism;Carbohydrate metabolism;Metabolism of cofactors and vitamins;Global and Overview	ko01100//Metabolic pathways;ko00500//Starch and sucrose metabolism;ko00230//Purine metabolism;ko00770//Pantothenate and CoA biosynthesis;ko00760//Nicotinate and nicotinamide metabolism	K01513	GO:0043229//intracellular organelle;GO:0005622//intracellular;GO:0005623//cell;GO:0043227//membrane-bounded organelle;GO:0043226//organelle;GO:0043231//intracellular membrane-bounded organelle;GO:0044424//intracellular part;GO:0044464//cell part	GO:0003824//catalytic activity	GO:0044237//cellular metabolic process;GO:0006082//organic acid metabolic process;GO:0010467//gene expression;GO:0019752//carboxylic acid metabolic process;GO:0034641//cellular nitrogen compound metabolic process;GO:0000097//sulfur amino acid biosynthetic process;GO:0043170//macromolecule metabolic process;GO:0006807//nitrogen compound metabolic process;GO:0016053//organic acid biosynthetic proce…
BnaA01g07290D	34.12	23.1067	3.03667	1.9	49.59	25.2633	4.99333	2.36667	-0.676489	0.215915	-1.07715	0.0333148	embryo defective 2752 [Arabidopsis thaliana]	-	-	-	-	GO:0005623//cell;GO:0044424//intracellular part;GO:0043229//intracellular organelle;GO:0043227//membrane-bounded organelle;GO:0043231//intracellular membrane-bounded organelle;GO:0005622//intracellular;GO:0043226//organelle;GO:0044464//cell part	-	GO:0032502//developmental process;GO:0000003//reproduction;GO:0022414//reproductive process;GO:0003006//developmental process involved in reproduction
BnaA01g07320D	22.3333	13.6667	0.92	0.526667	27.6667	7.66667	1.27333	0.333333	-0.804744	0.153429	-1.93357	0.000427731	BnaA01g07320D [Brassica napus]	Metabolism	Metabolism of cofactors and vitamins;Global and Overview	ko01100//Metabolic pathways;ko00750//Vitamin B6 metabolism	K13248	GO:0043226//organelle;GO:0005623//cell;GO:0005622//intracellular;GO:0043227//membrane-bounded organelle;GO:0043231//intracellular membrane-bounded organelle;GO:0044464//cell part;GO:0044424//intracellular part;GO:0043229//intracellular organelle	GO:0016787//hydrolase activity;GO:0003824//catalytic activity;GO:0016740//transferase activity;GO:0042578//phosphoric ester hydrolase activity;GO:0016791//phosphatase activity;GO:0016788//hydrolase activity, acting on ester bonds	GO:0008152//metabolic process
BnaA01g07330D	50.3333	16.6667	2.85	0.866667	40.6667	11	2.56	0.62	-1.71741	2.27e-05	-2.0458	6.65828e-05	BnaA01g07330D [Brassica napus]	-	-	-	-	GO:0016020//membrane	-	GO:0098542//defense response to other organism;GO:0044238//primary metabolic process;GO:0006950//response to stress;GO:0033554//cellular response to stress;GO:0008152//metabolic process;GO:0043207//response to external biotic stimulus;GO:0051716//cellular response to stimulus;GO:0009605//response to external stimulus;GO:0009416//response to light stimulus;GO:0009607//response to biotic stimulus;G…
BnaA01g07340D	358.787	818.227	14.53	30.14	345.473	603.667	15.5633	24.9133	1.05264	7.13e-06	0.678767	0.0124173	PREDICTED: protein arginine N-methyltransferase 1.1 [Brassica rapa]	-	-	-	-	GO:0044424//intracellular part;GO:0005622//intracellular;GO:0005737//cytoplasm;GO:0043231//intracellular membrane-bounded organelle;GO:0043233//organelle lumen;GO:0044428//nuclear part;GO:0043227//membrane-bounded organelle;GO:0031974//membrane-enclosed lumen;GO:0005623//cell;GO:0043226//organelle;GO:0044444//cytoplasmic part;GO:0044446//intracellular organelle part;GO:0005634//nucleus;GO:0044464…	GO:0005488//binding;GO:0016741//transferase activity, transferring one-carbon groups;GO:0008276//protein methyltransferase activity;GO:0003824//catalytic activity;GO:0008168//methyltransferase activity;GO:0016740//transferase activity	GO:0044763//single-organism cellular process;GO:0061458//reproductive system development;GO:0000003//reproduction;GO:0016570//histone modification;GO:0043414//macromolecule methylation;GO:0044699//single-organism process;GO:0009791//post-embryonic development;GO:0019538//protein metabolic process;GO:0006325//chromatin organization;GO:0009908//flower development;GO:0043412//macromolecule modificat…
BnaA01g07430D	76.87	19.36	6.17667	1.45333	82.7633	71.6667	7.44	5.93333	-2.08746	5.62e-07	-0.32646	0.442067	BnaA01g07430D [Brassica napus]	Genetic Information Processing	Translation	ko03010//Ribosome	K02957	GO:0015935//small ribosomal subunit;GO:0044422//organelle part;GO:0030529//intracellular ribonucleoprotein complex;GO:0044446//intracellular organelle part;GO:0005622//intracellular;GO:0005737//cytoplasm;GO:0044444//cytoplasmic part;GO:0005623//cell;GO:0043231//intracellular membrane-bounded organelle;GO:1990904//ribonucleoprotein complex;GO:0005840//ribosome;GO:0043229//intracellular organelle;G…	GO:0003735//structural constituent of ribosome;GO:0005198//structural molecule activity	GO:0008152//metabolic process;GO:0044249//cellular biosynthetic process;GO:0071704//organic substance metabolic process;GO:0044267//cellular protein metabolic process;GO:0009987//cellular process;GO:0010467//gene expression;GO:0034641//cellular nitrogen compound metabolic process;GO:0006807//nitrogen compound metabolic process;GO:0043170//macromolecule metabolic process;GO:1901566//organonitrogen…
BnaA01g07440D	39.6667	24	1.68	0.926667	50	24.6667	2.35333	1.05667	-0.858339	0.0283622	-1.15519	0.014044	BnaA01g07440D [Brassica napus]	-	-	-	-	GO:0043229//intracellular organelle;GO:0043231//intracellular membrane-bounded organelle;GO:0044464//cell part;GO:0043227//membrane-bounded organelle;GO:0043226//organelle;GO:0044424//intracellular part;GO:0005622//intracellular;GO:0005623//cell	GO:0005488//binding;GO:0005515//protein binding	GO:0009987//cellular process;GO:0044237//cellular metabolic process;GO:0009056//catabolic process;GO:0008152//metabolic process;GO:0044248//cellular catabolic process
BnaA01g07460D	169	96.6667	8.86667	4.68667	292.457	108.47	17.2467	5.89333	-0.91983	0.00241417	-1.54916	3.75144e-08	BnaA01g07460D [Brassica napus]	-	-	-	-	-	-	-
BnaA01g07470D	40.6667	57.6667	5.6	7.18	40.3333	18.3333	6.16333	2.46333	0.358557	0.374826	-1.3231	0.0321299	BnaA01g07470D [Brassica napus]	Genetic Information Processing	Translation	ko03010//Ribosome	K02983	GO:0044424//intracellular part;GO:1990904//ribonucleoprotein complex;GO:0043226//organelle;GO:0031981//nuclear lumen;GO:0015935//small ribosomal subunit;GO:0032991//macromolecular complex;GO:0043227//membrane-bounded organelle;GO:0005622//intracellular;GO:0005634//nucleus;GO:0070013//intracellular organelle lumen;GO:0043228//non-membrane-bounded organelle;GO:0030529//intracellular ribonucleoprote…	GO:0003735//structural constituent of ribosome;GO:0005198//structural molecule activity	GO:0009451//RNA modification;GO:0006725//cellular aromatic compound metabolic process;GO:0009059//macromolecule biosynthetic process;GO:0043604//amide biosynthetic process;GO:0044238//primary metabolic process;GO:0034641//cellular nitrogen compound metabolic process;GO:0046483//heterocycle metabolic process;GO:0090304//nucleic acid metabolic process;GO:0044271//cellular nitrogen compound biosynth…
BnaA01g07540D	162.627	59.6	8.26333	2.73667	157.433	70.02	8.88	3.67667	-1.5943	4.66e-08	-1.27216	0.000245361	BnaA01g07540D [Brassica napus]	Genetic Information Processing	Folding, sorting and degradation	ko04141//Protein processing in endoplasmic reticulum	K13989	-	-	-
BnaA01g07550D	75.5333	2.66667	2.73333	0.09	33.1033	3.33333	1.29333	0.123333	-4.92459	1.95e-16	-3.39046	7.59227e-07	DUF1005 family protein (DUF1005) [Arabidopsis thaliana]	-	-	-	-	GO:0044424//intracellular part;GO:0005618//cell wall;GO:0005622//intracellular;GO:0005623//cell;GO:0044464//cell part;GO:0043229//intracellular organelle;GO:0043226//organelle;GO:0043227//membrane-bounded organelle;GO:0030312//external encapsulating structure;GO:0071944//cell periphery;GO:0043231//intracellular membrane-bounded organelle	-	-
BnaA01g07610D	754.623	375.747	21.44	9.73667	339.553	380.133	10.7767	11.09	-1.13881	4.35e-07	0.0413484	0.986951	PREDICTED: ATP-dependent 6-phosphofructokinase 1 [Brassica rapa]	Metabolism;Genetic Information Processing	Global and Overview;Folding, sorting and degradation;Carbohydrate metabolism	ko01100//Metabolic pathways;ko01110//Biosynthesis of secondary metabolites;ko01130//Biosynthesis of antibiotics;ko01120//Microbial metabolism in diverse environments;ko01200//Carbon metabolism;ko01230//Biosynthesis of amino acids;ko03018//RNA degradation;ko00010//Glycolysis / Gluconeogenesis;ko00051//Fructose and mannose metabolism;ko00052//Galactose metabolism;ko00030//Pentose phosphate pathway	K00850	GO:0005622//intracellular;GO:0032991//macromolecular complex;GO:0005829//cytosol;GO:0061695//transferase complex, transferring phosphorus-containing groups;GO:0044444//cytoplasmic part;GO:1990234//transferase complex;GO:1902494//catalytic complex;GO:0005623//cell;GO:0005945//6-phosphofructokinase complex;GO:0044424//intracellular part;GO:0016020//membrane;GO:0044445//cytosolic part;GO:0005737//cy…	GO:0032559//adenyl ribonucleotide binding;GO:0005488//binding;GO:0032553//ribonucleotide binding;GO:0016301//kinase activity;GO:0016740//transferase activity;GO:0003824//catalytic activity;GO:0030554//adenyl nucleotide binding;GO:0097367//carbohydrate derivative binding;GO:0035639//purine ribonucleoside triphosphate binding;GO:0019200//carbohydrate kinase activity;GO:0008443//phosphofructokinase …	GO:0042278//purine nucleoside metabolic process;GO:1901564//organonitrogen compound metabolic process;GO:0044281//small molecule metabolic process;GO:0009987//cellular process;GO:0006757//ATP generation from ADP;GO:0046496//nicotinamide nucleotide metabolic process;GO:0009126//purine nucleoside monophosphate metabolic process;GO:0055086//nucleobase-containing small molecule metabolic process;GO:0…
BnaA01g07620D	452.51	66.84	13.0033	1.76667	350.59	55.1167	11.2567	1.62	-2.87978	9.03e-31	-2.79671	4.51855e-22	BnaA01g07620D [Brassica napus]	Metabolism	Metabolism of other amino acids;Global and Overview;Lipid metabolism	ko01100//Metabolic pathways;ko00480//Glutathione metabolism;ko00460//Cyanoamino acid metabolism;ko00430//Taurine and hypotaurine metabolism;ko00590//Arachidonic acid metabolism	K18592	-	GO:0016755//transferase activity, transferring amino-acyl groups;GO:0016740//transferase activity;GO:0016746//transferase activity, transferring acyl groups;GO:0003824//catalytic activity;GO:0003840//gamma-glutamyltransferase activity	GO:0006749//glutathione metabolic process;GO:0044237//cellular metabolic process;GO:1901564//organonitrogen compound metabolic process;GO:0006518//peptide metabolic process;GO:0006575//cellular modified amino acid metabolic process;GO:0071704//organic substance metabolic process;GO:0009987//cellular process;GO:0043603//cellular amide metabolic process;GO:0008152//metabolic process;GO:0034641//cel…
BnaA01g07630D	4.5	0.5	0.236667	0.0266667	3.5	0.333333	0.196667	0.02	-3.14975	0.0367296	-3.29768	0.154095	BnaA01g07630D [Brassica napus]	-	-	-	-	-	GO:0005488//binding;GO:0003677//DNA binding;GO:1901363//heterocyclic compound binding;GO:0003676//nucleic acid binding;GO:0097159//organic cyclic compound binding	-
BnaA01g07790D	39.4433	17.66	1.78667	0.73	116.943	1	5.92	0.05	-1.2913	0.0139851	-6.88753	3.59457e-28	BnaA01g07790D [Brassica napus]	-	-	-	-	-	-	-
BnaA01g07800D	66.25	19.3033	4.46	1.19	36.8233	30.4667	2.76667	2.14	-1.90608	0.00043955	-0.370538	0.607212	BnaA01g07800D [Brassica napus]	-	-	-	-	-	-	-
BnaA01g07820D	199.667	83	10.9933	4.14333	196.797	155.13	11.98	8.71333	-1.40777	3.63e-07	-0.459331	0.137328	BnaA01g07820D [Brassica napus]	-	-	-	-	-	-	-
BnaA01g07910D	806.327	468.31	17.3733	9.14667	1233.39	369.083	29.8033	8.23667	-0.925557	0.00200507	-1.85534	1.10644e-12	PREDICTED: peroxisomal fatty acid beta-oxidation multifunctional protein AIM1 [Brassica napus]	Metabolism	Global and Overview;Lipid metabolism	ko01100//Metabolic pathways;ko01110//Biosynthesis of secondary metabolites;ko01212//Fatty acid metabolism;ko00071//Fatty acid degradation;ko00592//alpha-Linolenic acid metabolism	K10527	GO:0030054//cell junction;GO:0043229//intracellular organelle;GO:0071944//cell periphery;GO:0009536//plastid;GO:0030312//external encapsulating structure;GO:0005737//cytoplasm;GO:0005911//cell-cell junction;GO:0044424//intracellular part;GO:0005622//intracellular;GO:0044444//cytoplasmic part;GO:0042579//microbody;GO:0005623//cell;GO:0043231//intracellular membrane-bounded organelle;GO:0044464//ce…	GO:0003824//catalytic activity;GO:1901265//nucleoside phosphate binding;GO:0016835//carbon-oxygen lyase activity;GO:0016614//oxidoreductase activity, acting on CH-OH group of donors;GO:0097159//organic cyclic compound binding;GO:0016836//hydro-lyase activity;GO:0003857//3-hydroxyacyl-CoA dehydrogenase activity;GO:0016616//oxidoreductase activity, acting on the CH-OH group of donors, NAD or NADP a…	GO:0048608//reproductive structure development;GO:0016042//lipid catabolic process;GO:0044238//primary metabolic process;GO:0044767//single-organism developmental process;GO:0032787//monocarboxylic acid metabolic process;GO:0061458//reproductive system development;GO:0007275//multicellular organism development;GO:0044237//cellular metabolic process;GO:0009694//jasmonic acid metabolic process;GO:0…
BnaA01g07920D	47.7333	55.67	1.2	1.27667	125.937	29.8067	3.54333	0.786667	0.0893475	0.895023	-2.17128	8.15753e-10	BnaA01g07920D [Brassica napus]	-	-	-	-	-	GO:0001071//nucleic acid binding transcription factor activity	GO:0097659//nucleic acid-templated transcription;GO:0009987//cellular process;GO:0006139//nucleobase-containing compound metabolic process;GO:0009058//biosynthetic process;GO:0044237//cellular metabolic process;GO:0019438//aromatic compound biosynthetic process;GO:0034641//cellular nitrogen compound metabolic process;GO:0006351//transcription, DNA-templated;GO:0044238//primary metabolic process;G…
BnaA01g07930D	40.3333	40.6667	1.97333	1.79667	61.6667	31	3.35333	1.55	-0.135312	0.856075	-1.11333	0.00560741	BnaA01g07930D [Brassica napus]	-	-	-	-	GO:0044464//cell part;GO:0005622//intracellular;GO:0005623//cell	GO:0043169//cation binding;GO:0046872//metal ion binding;GO:0046914//transition metal ion binding;GO:0043167//ion binding;GO:0005488//binding;GO:0008270//zinc ion binding	-
BnaA01g07950D	7.33333	0.333333	0.356667	0.0166667	8	3.66667	0.44	0.176667	-4.41954	0.000598721	-1.31647	0.212853	PREDICTED: rac-like GTP-binding protein ARAC7 [Brassica rapa]	Cellular Processes	Transport and catabolism	ko04145//Phagosome	K04392	GO:0016020//membrane;GO:0005623//cell;GO:0005622//intracellular;GO:0044464//cell part	GO:0097367//carbohydrate derivative binding;GO:0016817//hydrolase activity, acting on acid anhydrides;GO:0016818//hydrolase activity, acting on acid anhydrides, in phosphorus-containing anhydrides;GO:1901265//nucleoside phosphate binding;GO:0032561//guanyl ribonucleotide binding;GO:0043168//anion binding;GO:0035639//purine ribonucleoside triphosphate binding;GO:0017076//purine nucleotide binding;…	GO:0051234//establishment of localization;GO:0023052//signaling;GO:0030036//actin cytoskeleton organization;GO:0065007//biological regulation;GO:0016043//cellular component organization;GO:0009987//cellular process;GO:0035556//intracellular signal transduction;GO:0006996//organelle organization;GO:0044700//single organism signaling;GO:0050794//regulation of cellular process;GO:0006810//transport;…
BnaA01g07960D	45.15	10.3333	0.593333	0.123333	34.2267	11.3867	0.496667	0.146667	-2.26628	0.0031399	-1.75974	0.00253623	BnaA01g07960D [Brassica napus]	-	-	-	-	GO:0044424//intracellular part;GO:0043229//intracellular organelle;GO:0043226//organelle;GO:0005623//cell;GO:0005694//chromosome;GO:0043232//intracellular non-membrane-bounded organelle;GO:0043228//non-membrane-bounded organelle;GO:0005622//intracellular;GO:0044464//cell part	GO:0005524//ATP binding;GO:0000166//nucleotide binding;GO:0061505//DNA topoisomerase II activity;GO:0016853//isomerase activity;GO:0016817//hydrolase activity, acting on acid anhydrides;GO:0036094//small molecule binding;GO:0003918//DNA topoisomerase type II (ATP-hydrolyzing) activity;GO:1901363//heterocyclic compound binding;GO:0003824//catalytic activity;GO:1901265//nucleoside phosphate binding…	GO:1901360//organic cyclic compound metabolic process;GO:0009987//cellular process;GO:0051276//chromosome organization;GO:0008152//metabolic process;GO:0071704//organic substance metabolic process;GO:0034641//cellular nitrogen compound metabolic process;GO:0071840//cellular component organization or biogenesis;GO:0090304//nucleic acid metabolic process;GO:0016043//cellular component organization;…
BnaA01g07970D	1.66667	7.27667	0.0933333	0.35	6	9	0.35	0.493333	1.90689	0.03725	0.495208	0.710968	BnaA01g07970D [Brassica napus]	-	-	-	-	-	GO:0003824//catalytic activity	GO:0008152//metabolic process;GO:0009987//cellular process;GO:0046483//heterocycle metabolic process;GO:1901564//organonitrogen compound metabolic process;GO:0044237//cellular metabolic process;GO:0071704//organic substance metabolic process;GO:0006139//nucleobase-containing compound metabolic process;GO:0006725//cellular aromatic compound metabolic process;GO:0055086//nucleobase-containing small…
BnaA01g07980D	159.333	78.3333	5.04	2.25333	257.433	81.6667	9.15	2.63333	-1.16136	1.48e-05	-1.79688	2.09077e-09	BnaA01g07980D [Brassica napus]	-	-	-	-	GO:0044424//intracellular part;GO:0043226//organelle;GO:0043227//membrane-bounded organelle;GO:0043231//intracellular membrane-bounded organelle;GO:0043229//intracellular organelle;GO:0044464//cell part;GO:0005622//intracellular;GO:0005623//cell	GO:0005488//binding	GO:0009987//cellular process;GO:0008152//metabolic process;GO:0009725//response to hormone;GO:0044238//primary metabolic process;GO:0006725//cellular aromatic compound metabolic process;GO:0071495//cellular response to endogenous stimulus;GO:0006351//transcription, DNA-templated;GO:0044700//single organism signaling;GO:0007165//signal transduction;GO:0097659//nucleic acid-templated transcription;…
BnaA01g08000D	1.95333	3.10667	0.22	0.313333	8.44333	2.08667	1.01333	0.23	0.510195	0.77821	-2.1394	0.0455424	BnaA01g08000D [Brassica napus]	Metabolism;Cellular Processes	Transport and catabolism;Global and Overview	ko01100//Metabolic pathways;ko04146//Peroxisome	K11147	GO:0043229//intracellular organelle;GO:0042579//microbody;GO:0043226//organelle;GO:0005623//cell;GO:0043231//intracellular membrane-bounded organelle;GO:0044464//cell part;GO:0044424//intracellular part;GO:0044444//cytoplasmic part;GO:0043227//membrane-bounded organelle;GO:0005737//cytoplasm;GO:0005622//intracellular	GO:0005488//binding;GO:0097159//organic cyclic compound binding;GO:0036094//small molecule binding;GO:1901265//nucleoside phosphate binding;GO:1901363//heterocyclic compound binding;GO:0003824//catalytic activity;GO:0016491//oxidoreductase activity;GO:0000166//nucleotide binding	GO:0044767//single-organism developmental process;GO:0044237//cellular metabolic process;GO:0009850//auxin metabolic process;GO:0040007//growth;GO:0010817//regulation of hormone levels;GO:0044699//single-organism process;GO:0042221//response to chemical;GO:0050896//response to stimulus;GO:0048588//developmental cell growth;GO:0001101//response to acid chemical;GO:0032502//developmental process;GO…
BnaA01g08010D	17.38	4.33333	0.78	0.176667	15.6533	17.39	0.803333	0.78	-2.14244	0.00317032	-0.0425246	1	BnaA01g08010D [Brassica napus]	-	-	-	-	-	GO:0005515//protein binding;GO:0046914//transition metal ion binding;GO:0008270//zinc ion binding;GO:0043167//ion binding;GO:0005488//binding;GO:0043169//cation binding;GO:0046872//metal ion binding	-
BnaA01g08020D	223.333	125.667	9.09333	4.61667	171.627	91.33	7.82667	3.79333	-0.977958	0.000969666	-1.04493	0.000789595	BnaA01g08020D [Brassica napus]	-	-	-	-	-	GO:0004674//protein serine/threonine kinase activity;GO:0032550//purine ribonucleoside binding;GO:0016740//transferase activity;GO:0004672//protein kinase activity;GO:0097367//carbohydrate derivative binding;GO:0005488//binding;GO:0017076//purine nucleotide binding;GO:0000166//nucleotide binding;GO:1901363//heterocyclic compound binding;GO:0032559//adenyl ribonucleotide binding;GO:0001883//purine…	GO:0019538//protein metabolic process;GO:0006793//phosphorus metabolic process;GO:0009987//cellular process;GO:0044238//primary metabolic process;GO:0043170//macromolecule metabolic process;GO:0071704//organic substance metabolic process;GO:0006468//protein phosphorylation;GO:0044267//cellular protein metabolic process;GO:0008152//metabolic process;GO:0006796//phosphate-containing compound metabo…
BnaA01g08050D	3	2	0.273333	0.163333	7	0.666667	0.71	0.0566667	-0.742842	0.825315	-3.64725	0.00477886	BnaA01g08050D [Brassica napus]	-	-	-	-	-	GO:0008168//methyltransferase activity;GO:0097159//organic cyclic compound binding;GO:0016741//transferase activity, transferring one-carbon groups;GO:0003824//catalytic activity;GO:0005488//binding;GO:0003676//nucleic acid binding;GO:0016740//transferase activity;GO:1901363//heterocyclic compound binding	GO:0032259//methylation;GO:0008152//metabolic process
BnaA01g08080D	0.333333	0	0.04	0.001	11.8767	0	1.61	0.001	-5.32193	1	-10.6528	6.8054e-06	BnaA01g08080D [Brassica napus]	Genetic Information Processing	Translation	ko03010//Ribosome	K02971	GO:1990904//ribonucleoprotein complex;GO:0005737//cytoplasm;GO:0043229//intracellular organelle;GO:0005622//intracellular;GO:0030529//intracellular ribonucleoprotein complex;GO:0044464//cell part;GO:0043226//organelle;GO:0043232//intracellular non-membrane-bounded organelle;GO:0032991//macromolecular complex;GO:0005840//ribosome;GO:0044444//cytoplasmic part;GO:0005623//cell;GO:0044424//intracellu…	GO:0003735//structural constituent of ribosome;GO:0005198//structural molecule activity	GO:0009059//macromolecule biosynthetic process;GO:0044238//primary metabolic process;GO:0009058//biosynthetic process;GO:0009987//cellular process;GO:0010467//gene expression;GO:1901576//organic substance biosynthetic process;GO:0043170//macromolecule metabolic process;GO:0006518//peptide metabolic process;GO:1901566//organonitrogen compound biosynthetic process;GO:0044267//cellular protein metab…
BnaA01g08120D	679.767	183.233	30.3733	7.52	404.773	160.38	19.53	6.91667	-2.014	2.41e-07	-1.49754	0.00380283	PREDICTED: GDSL esterase/lipase At4g28780 [Brassica rapa]	-	-	-	-	-	GO:0003824//catalytic activity;GO:0016787//hydrolase activity	GO:0046483//heterocycle metabolic process;GO:0044767//single-organism developmental process;GO:0044707//single-multicellular organism process;GO:0048856//anatomical structure development;GO:0032502//developmental process;GO:0034641//cellular nitrogen compound metabolic process;GO:0009987//cellular process;GO:0044699//single-organism process;GO:0043412//macromolecule modification;GO:0009653//anato…
BnaA01g08140D	225.493	91.7867	4.58	1.71	252.097	105.733	5.69	2.17667	-1.42135	2.22e-07	-1.38631	1.26352e-05	BnaA01g08140D [Brassica napus]	-	-	-	-	-	-	-
BnaA01g08200D	830.993	272.79	8.26667	2.46333	530.363	271.473	5.84667	2.75667	-1.74669	7.77e-14	-1.08469	3.0129e-05	BnaA01g08200D [Brassica napus]	-	-	-	-	GO:0016459//myosin complex;GO:0015629//actin cytoskeleton;GO:0005622//intracellular;GO:0044446//intracellular organelle part;GO:0043234//protein complex;GO:0043229//intracellular organelle;GO:0005623//cell;GO:0005856//cytoskeleton;GO:0032991//macromolecular complex;GO:0044430//cytoskeletal part;GO:0043228//non-membrane-bounded organelle;GO:0043226//organelle;GO:0044422//organelle part;GO:0043232/…	GO:0036094//small molecule binding;GO:0043167//ion binding;GO:0003824//catalytic activity;GO:0016787//hydrolase activity;GO:0035639//purine ribonucleoside triphosphate binding;GO:0097367//carbohydrate derivative binding;GO:0003774//motor activity;GO:1901265//nucleoside phosphate binding;GO:0000166//nucleotide binding;GO:0005515//protein binding;GO:0005488//binding;GO:0097159//organic cyclic compo…	-
BnaA01g08210D	44.3333	28.44	4.74	2.77333	185.963	6.76333	22.43	0.73	-0.773266	0.0850276	-4.94139	6.88571e-32	BnaA01g08210D [Brassica napus]	-	-	-	-	GO:0005622//intracellular;GO:0044424//intracellular part;GO:0044464//cell part;GO:0043226//organelle;GO:0043231//intracellular membrane-bounded organelle;GO:0043227//membrane-bounded organelle;GO:0043229//intracellular organelle;GO:0005623//cell	-	-
BnaA01g08240D	840.227	164.1	21.6067	3.82667	440.197	291.027	12.51	7.32667	-2.49732	1.17e-20	-0.771853	0.0516392	BnaA01g08240D [Brassica napus]	Metabolism	Biosynthesis of other secondary metabolites;Amino acid metabolism;Global and Overview	ko01100//Metabolic pathways;ko01110//Biosynthesis of secondary metabolites;ko00350//Tyrosine metabolism;ko00950//Isoquinoline alkaloid biosynthesis	K01592	GO:0044424//intracellular part;GO:0044464//cell part;GO:0005622//intracellular;GO:0005623//cell	GO:0097159//organic cyclic compound binding;GO:0016831//carboxy-lyase activity;GO:0043168//anion binding;GO:0005488//binding;GO:1901363//heterocyclic compound binding;GO:0016830//carbon-carbon lyase activity;GO:0043167//ion binding;GO:0003824//catalytic activity;GO:0016829//lyase activity;GO:0048037//cofactor binding;GO:0030170//pyridoxal phosphate binding	GO:1901362//organic cyclic compound biosynthetic process;GO:0008152//metabolic process;GO:0009987//cellular process;GO:0044281//small molecule metabolic process;GO:0018958//phenol-containing compound metabolic process;GO:1901564//organonitrogen compound metabolic process;GO:0006950//response to stress;GO:1901360//organic cyclic compound metabolic process;GO:0044710//single-organism metabolic proc…
BnaA01g08260D	243.653	88.6667	18.8067	6.23667	91.3433	63.9767	7.76333	4.89667	-1.5924	8.77e-09	-0.664876	0.106034	BnaA01g08260D [Brassica napus]	Metabolism	Energy metabolism;Global and Overview	ko01100//Metabolic pathways;ko00195//Photosynthesis	K08903	GO:0043234//protein complex;GO:0044424//intracellular part;GO:1902494//catalytic complex;GO:0016020//membrane;GO:0005622//intracellular;GO:0032991//macromolecular complex;GO:1990204//oxidoreductase complex;GO:0009521//photosystem;GO:0009579//thylakoid;GO:0042651//thylakoid membrane;GO:0044464//cell part;GO:0009523//photosystem II;GO:0044436//thylakoid part;GO:0034357//photosynthetic membrane;GO:0…	-	GO:0008152//metabolic process;GO:0044237//cellular metabolic process;GO:0009987//cellular process;GO:0015979//photosynthesis
BnaA01g08280D	126	50.5533	6.08667	2.24333	75.6667	80.3333	4.1	3.88	-1.44001	6.23e-07	-0.0795673	0.952899	BnaA01g08280D [Brassica napus]	Environmental Information Processing	Signal transduction	ko04075//Plant hormone signal transduction	K14484	GO:0043226//organelle;GO:0005623//cell;GO:0005911//cell-cell junction;GO:0044424//intracellular part;GO:0005622//intracellular;GO:0005634//nucleus;GO:0044464//cell part;GO:0043227//membrane-bounded organelle;GO:0043231//intracellular membrane-bounded organelle;GO:0030054//cell junction;GO:0043229//intracellular organelle	GO:0005515//protein binding;GO:0046983//protein dimerization activity;GO:0005488//binding;GO:0001071//nucleic acid binding transcription factor activity	GO:0008152//metabolic process;GO:0006807//nitrogen compound metabolic process;GO:0010033//response to organic substance;GO:0071495//cellular response to endogenous stimulus;GO:0009725//response to hormone;GO:0006725//cellular aromatic compound metabolic process;GO:0050896//response to stimulus;GO:0019438//aromatic compound biosynthetic process;GO:0044700//single organism signaling;GO:0071704//org…
BnaA01g08290D	143.24	52.83	3.98667	1.33	11.3333	46.8733	0.34	1.28667	-1.58376	1.45e-05	1.92003	0.000443904	PREDICTED: ABC transporter B family member 23, mitochondrial [Brassica napus]	Environmental Information Processing	Membrane transport	ko02010//ABC transporters	K05663	GO:0043231//intracellular membrane-bounded organelle;GO:0005737//cytoplasm;GO:0016021//integral component of membrane;GO:0044464//cell part;GO:0005623//cell;GO:0031224//intrinsic component of membrane;GO:0043228//non-membrane-bounded organelle;GO:0044425//membrane part;GO:0016020//membrane;GO:0005856//cytoskeleton;GO:0043229//intracellular organelle;GO:0043226//organelle;GO:0043232//intracellular…	GO:0016887//ATPase activity;GO:0005488//binding;GO:0016462//pyrophosphatase activity;GO:0030554//adenyl nucleotide binding;GO:0017076//purine nucleotide binding;GO:0035639//purine ribonucleoside triphosphate binding;GO:0032553//ribonucleotide binding;GO:0043168//anion binding;GO:0043167//ion binding;GO:0016817//hydrolase activity, acting on acid anhydrides;GO:0032555//purine ribonucleotide bindin…	GO:0055085//transmembrane transport;GO:0044238//primary metabolic process;GO:0051179//localization;GO:0008152//metabolic process;GO:0006810//transport;GO:0009987//cellular process;GO:0006928//movement of cell or subcellular component;GO:0044699//single-organism process;GO:0044267//cellular protein metabolic process;GO:0036211//protein modification process;GO:0044763//single-organism cellular proc…
BnaA01g08300D	92.9067	267.773	2.85333	7.47333	67.55	145.127	2.28	4.55333	1.3891	2.27e-08	0.997889	0.00152239	BnaA01g08300D [Brassica napus]	-	-	-	-	-	GO:0003676//nucleic acid binding;GO:0097159//organic cyclic compound binding;GO:0003677//DNA binding;GO:0005488//binding;GO:0044877//macromolecular complex binding;GO:0003682//chromatin binding;GO:1901363//heterocyclic compound binding	-
BnaA01g08380D	200.79	24.4867	9.11	1.00667	159.34	223.527	8.00667	10.0933	-3.17787	4.98e-22	0.334129	0.502206	PREDICTED: receptor-like protein kinase 5 [Brassica napus]	-	-	-	-	GO:0016020//membrane	GO:0001883//purine nucleoside binding;GO:0016772//transferase activity, transferring phosphorus-containing groups;GO:0036094//small molecule binding;GO:0004672//protein kinase activity;GO:0043168//anion binding;GO:0017076//purine nucleotide binding;GO:0016773//phosphotransferase activity, alcohol group as acceptor;GO:0032559//adenyl ribonucleotide binding;GO:0035639//purine ribonucleoside triphos…	GO:0048608//reproductive structure development;GO:0044700//single organism signaling;GO:0051704//multi-organism process;GO:0007154//cell communication;GO:0023052//signaling;GO:0051707//response to other organism;GO:0006952//defense response;GO:0007167//enzyme linked receptor protein signaling pathway;GO:0099402//plant organ development;GO:0010015//root morphogenesis;GO:0050789//regulation of biol…
BnaA01g08400D	4	0	0.6	0.001	0	11.0967	0.001	1.61333	-9.22882	0.0050568	10.6558	1.94437e-05	BnaA01g08400D [Brassica napus]	-	-	-	-	-	GO:0016740//transferase activity;GO:0003824//catalytic activity;GO:0016301//kinase activity;GO:0016772//transferase activity, transferring phosphorus-containing groups	GO:0010467//gene expression;GO:0009057//macromolecule catabolic process;GO:0044238//primary metabolic process;GO:0010015//root morphogenesis;GO:0044707//single-multicellular organism process;GO:0044699//single-organism process;GO:0048364//root development;GO:0008152//metabolic process;GO:0009886//post-embryonic morphogenesis;GO:0006464//cellular protein modification process;GO:0007275//multicellu…
BnaA01g08410D	23.6667	2.37667	2.4	0.216667	18.74	35.0533	2.03	3.44	-3.46949	7.23e-06	0.760929	0.313177	BnaA01g08410D [Brassica napus]	-	-	-	-	GO:0016020//membrane	GO:0032550//purine ribonucleoside binding;GO:0016772//transferase activity, transferring phosphorus-containing groups;GO:0001882//nucleoside binding;GO:0097159//organic cyclic compound binding;GO:0001883//purine nucleoside binding;GO:0032549//ribonucleoside binding;GO:0016301//kinase activity;GO:0097367//carbohydrate derivative binding;GO:0016740//transferase activity;GO:1901363//heterocyclic com…	GO:0044237//cellular metabolic process;GO:0048856//anatomical structure development;GO:0009886//post-embryonic morphogenesis;GO:0050896//response to stimulus;GO:0044702//single organism reproductive process;GO:0051716//cellular response to stimulus;GO:0007165//signal transduction;GO:0006793//phosphorus metabolic process;GO:0044700//single organism signaling;GO:0043170//macromolecule metabolic pro…
BnaA01g08500D	102.493	25.8467	1.07667	0.246667	123.58	31.9367	1.43	0.333333	-2.12594	1.85e-10	-2.10098	2.51929e-09	BnaA01g08500D [Brassica napus]	-	-	-	-	-	GO:1901363//heterocyclic compound binding;GO:0016741//transferase activity, transferring one-carbon groups;GO:0003723//RNA binding;GO:0097159//organic cyclic compound binding;GO:0016740//transferase activity;GO:0008168//methyltransferase activity;GO:0008173//RNA methyltransferase activity;GO:0003824//catalytic activity;GO:0005488//binding;GO:0003676//nucleic acid binding	GO:0008152//metabolic process;GO:0006139//nucleobase-containing compound metabolic process;GO:0006725//cellular aromatic compound metabolic process;GO:0090304//nucleic acid metabolic process;GO:1901360//organic cyclic compound metabolic process;GO:0071704//organic substance metabolic process;GO:0043170//macromolecule metabolic process;GO:0044237//cellular metabolic process;GO:0009987//cellular pr…
BnaA01g08510D	82.2	515.397	6.65	38.2667	330.027	128.237	30.1	10.9467	2.52466	0.000357945	-1.45927	0.000118429	BnaA01g08510D [Brassica napus]	-	-	-	-	GO:0005622//intracellular;GO:0005623//cell;GO:0044424//intracellular part;GO:0044464//cell part;GO:0016020//membrane	GO:0043167//ion binding;GO:0005488//binding;GO:0046872//metal ion binding;GO:0043169//cation binding;GO:0005509//calcium ion binding;GO:0005515//protein binding;GO:0019899//enzyme binding	GO:0051704//multi-organism process;GO:0009607//response to biotic stimulus;GO:0044700//single organism signaling;GO:0033036//macromolecule localization;GO:0009620//response to fungus;GO:0033554//cellular response to stress;GO:0051649//establishment of localization in cell;GO:0006952//defense response;GO:0050794//regulation of cellular process;GO:0071804//cellular potassium ion transport;GO:003422…
BnaA01g08520D	25.43	10.3333	0.846667	0.316667	43	11	1.6	0.37	-1.41883	0.00648294	-2.11247	1.8195e-05	BnaA01g08520D [Brassica napus]	-	-	-	-	-	-	-
BnaA01g08550D	10	14.6667	0.963333	1.31	24	6.33333	2.61	0.61	0.44346	0.558772	-2.09717	0.00196791	BnaC01g10250D [Brassica napus]	-	-	-	-	-	-	-
BnaA01g08610D	10.69	2.66667	0.64	0.146667	8.33333	8.33333	0.566667	0.496667	-2.12553	0.00796352	-0.190222	0.955111	BnaA01g08610D [Brassica napus]	-	-	-	-	GO:0043231//intracellular membrane-bounded organelle;GO:0043226//organelle;GO:0044424//intracellular part;GO:0005623//cell;GO:0043227//membrane-bounded organelle;GO:0044464//cell part;GO:0005622//intracellular;GO:0043229//intracellular organelle	GO:0003676//nucleic acid binding;GO:1901363//heterocyclic compound binding;GO:0044877//macromolecular complex binding;GO:0097159//organic cyclic compound binding;GO:0003682//chromatin binding;GO:0001071//nucleic acid binding transcription factor activity;GO:0005488//binding;GO:0003677//DNA binding	GO:0097659//nucleic acid-templated transcription;GO:0071704//organic substance metabolic process;GO:0044271//cellular nitrogen compound biosynthetic process;GO:0044238//primary metabolic process;GO:0009987//cellular process;GO:0043170//macromolecule metabolic process;GO:0009059//macromolecule biosynthetic process;GO:1901360//organic cyclic compound metabolic process;GO:0032774//RNA biosynthetic p…
BnaA01g08620D	55.4867	174.237	2.12333	6.05	219.337	154.37	9.39333	6.28	1.5106	1.07e-06	-0.580873	0.0993428	PREDICTED: binding partner of ACD11 1-like isoform X1 [Brassica napus]	-	-	-	-	GO:0044444//cytoplasmic part;GO:0044464//cell part;GO:0005623//cell;GO:0043231//intracellular membrane-bounded organelle;GO:0043227//membrane-bounded organelle;GO:0043229//intracellular organelle;GO:0005737//cytoplasm;GO:0005622//intracellular;GO:0044424//intracellular part;GO:0043226//organelle	GO:1901265//nucleoside phosphate binding;GO:0005488//binding;GO:0097159//organic cyclic compound binding;GO:0003676//nucleic acid binding;GO:0036094//small molecule binding;GO:1901363//heterocyclic compound binding;GO:0000166//nucleotide binding	GO:0051707//response to other organism;GO:0051716//cellular response to stimulus;GO:0051704//multi-organism process;GO:0006952//defense response;GO:0050896//response to stimulus;GO:0098542//defense response to other organism;GO:0009605//response to external stimulus;GO:0045087//innate immune response;GO:0009814//defense response, incompatible interaction;GO:0002376//immune system process;GO:00099…
BnaA01g08630D	352.873	267.777	15.5967	10.86	903.283	242.48	44.7	10.9767	-0.522214	0.0887137	-2.02583	1.12705e-14	PREDICTED: syntaxin-23 [Brassica napus]	Genetic Information Processing;Cellular Processes	Folding, sorting and degradation;Transport and catabolism	ko04145//Phagosome;ko04130//SNARE interactions in vesicular transport	K08488	GO:0044446//intracellular organelle part;GO:0005737//cytoplasm;GO:0044444//cytoplasmic part;GO:0044424//intracellular part;GO:0005773//vacuole;GO:0005623//cell;GO:0043231//intracellular membrane-bounded organelle;GO:0043229//intracellular organelle;GO:0016020//membrane;GO:0005622//intracellular;GO:0044464//cell part;GO:0043226//organelle;GO:0043227//membrane-bounded organelle;GO:0044437//vacuolar…	GO:0005484//SNAP receptor activity;GO:0005515//protein binding;GO:0005488//binding	GO:0006886//intracellular protein transport;GO:0007275//multicellular organism development;GO:0033036//macromolecule localization;GO:0045184//establishment of protein localization;GO:0044699//single-organism process;GO:0071840//cellular component organization or biogenesis;GO:0032502//developmental process;GO:0016043//cellular component organization;GO:0045229//external encapsulating structure or…
BnaA01g08680D	201.693	45.0533	10.1267	2.06	135.063	39.8	7.50667	2.04667	-2.29744	4.43e-18	-1.8749	3.36788e-07	PREDICTED: uncharacterized membrane protein At4g09580-like [Brassica napus]	-	-	-	-	-	-	GO:0008152//metabolic process;GO:0006644//phospholipid metabolic process;GO:0090407//organophosphate biosynthetic process;GO:0044249//cellular biosynthetic process;GO:0006650//glycerophospholipid metabolic process;GO:0071704//organic substance metabolic process;GO:0044763//single-organism cellular process;GO:0044255//cellular lipid metabolic process;GO:0006796//phosphate-containing compound metab…
BnaA01g08700D	124.333	66.6533	5.47333	2.65333	112.953	72	5.48333	3.21667	-1.04461	0.000250215	-0.769487	0.0180634	PREDICTED: acetylornithine deacetylase [Brassica napus]	Metabolism	Amino acid metabolism;Global and Overview	ko01100//Metabolic pathways;ko01110//Biosynthesis of secondary metabolites;ko01130//Biosynthesis of antibiotics;ko01230//Biosynthesis of amino acids;ko01210//2-Oxocarboxylic acid metabolism;ko00220//Arginine biosynthesis	K01438	-	GO:0003824//catalytic activity;GO:0016787//hydrolase activity	GO:0008152//metabolic process
BnaA01g08770D	186.333	99.1467	8.53	4.2	140.87	90.8667	7.19667	4.33333	-1.02216	0.000138854	-0.731852	0.0293457	BnaA01g08770D [Brassica napus]	-	-	-	-	-	-	-
BnaA01g08780D	31.9733	7.04667	1.95667	0.393333	38.7	7.60333	2.62667	0.47	-2.31457	0.000175149	-2.4825	7.49309e-06	BnaA01g08780D [Brassica napus]	Metabolism	Global and Overview;Glycan biosynthesis and metabolism	ko01100//Metabolic pathways;ko00563//Glycosylphosphatidylinositol(GPI)-anchor biosynthesis	K05283	-	GO:0046914//transition metal ion binding;GO:0046872//metal ion binding;GO:0043169//cation binding;GO:0008270//zinc ion binding;GO:0005515//protein binding;GO:0043167//ion binding;GO:0005488//binding	-
BnaA01g08810D	26.1033	15.5933	0.946667	0.523333	34.1233	13	1.36333	0.493333	-0.855126	0.100845	-1.4665	0.00879282	BnaA01g08810D [Brassica napus]	-	-	-	-	-	GO:0003676//nucleic acid binding;GO:1901363//heterocyclic compound binding;GO:0003677//DNA binding;GO:0005488//binding;GO:0097159//organic cyclic compound binding	-
BnaA01g08820D	57	23.6667	4.1	1.56333	63	21.6667	5.03667	1.62333	-1.391	0.000131412	-1.63351	7.3244e-05	BnaC01g10500D [Brassica napus]	-	-	-	-	GO:0044424//intracellular part;GO:0044464//cell part;GO:0005623//cell;GO:0005622//intracellular	-	-
BnaA01g08850D	141.67	36.1767	4.29333	0.99	141.847	46	4.74667	1.39333	-2.1166	3.38e-12	-1.76837	4.99828e-07	BnaA01g08850D [Brassica napus]	Environmental Information Processing	Signal transduction	ko04075//Plant hormone signal transduction	K14500	GO:0016020//membrane	GO:0032553//ribonucleotide binding;GO:0017076//purine nucleotide binding;GO:0001883//purine nucleoside binding;GO:0004672//protein kinase activity;GO:0005515//protein binding;GO:0035639//purine ribonucleoside triphosphate binding;GO:0016301//kinase activity;GO:0005488//binding;GO:1901363//heterocyclic compound binding;GO:0032559//adenyl ribonucleotide binding;GO:0043168//anion binding;GO:0005524/…	GO:0009755//hormone-mediated signaling pathway;GO:0023052//signaling;GO:0044763//single-organism cellular process;GO:0036211//protein modification process;GO:0043170//macromolecule metabolic process;GO:0006468//protein phosphorylation;GO:0008152//metabolic process;GO:0006793//phosphorus metabolic process;GO:0050794//regulation of cellular process;GO:0071396//cellular response to lipid;GO:0032870/…
BnaA01g08860D	137.737	464.887	6.47	19.9067	182.593	179.993	9.58333	8.61333	1.62141	2.54e-12	-0.153956	0.725491	PREDICTED: type I inositol polyphosphate 5-phosphatase 2-like [Brassica napus]	-	-	-	-	-	-	GO:0009987//cellular process;GO:0006793//phosphorus metabolic process;GO:0019637//organophosphate metabolic process;GO:0044763//single-organism cellular process;GO:0071704//organic substance metabolic process;GO:0006644//phospholipid metabolic process;GO:0008152//metabolic process;GO:0006650//glycerophospholipid metabolic process;GO:0044699//single-organism process;GO:0046488//phosphatidylinosito…
BnaA01g08870D	60.7967	220.86	4.41	14.67	152.217	181.863	12.4467	13.7267	1.73402	1.73e-09	0.141222	0.738222	BnaA01g08870D [Brassica napus]	-	-	-	-	-	-	-
BnaA01g08890D	202.013	48.3633	5.38333	1.16333	205.65	108.457	6.14	2.90667	-2.21024	1.66e-15	-1.07887	0.000781503	BnaA01g08890D [Brassica napus]	-	-	-	-	-	GO:0005057//receptor signaling protein activity;GO:0044877//macromolecular complex binding;GO:0003682//chromatin binding;GO:0003676//nucleic acid binding;GO:0097159//organic cyclic compound binding;GO:0003677//DNA binding;GO:0004871//signal transducer activity;GO:1901363//heterocyclic compound binding;GO:0000156//phosphorelay response regulator activity;GO:0005488//binding	GO:0044700//single organism signaling;GO:0050789//regulation of biological process;GO:0035556//intracellular signal transduction;GO:0009987//cellular process;GO:0007165//signal transduction;GO:0000160//phosphorelay signal transduction system;GO:0051716//cellular response to stimulus;GO:0023052//signaling;GO:0044763//single-organism cellular process;GO:0050896//response to stimulus;GO:0007154//cel…
BnaA01g08930D	90.6133	44	2.27667	1.02333	60.5367	42.5267	1.69333	1.09333	-1.15365	0.00125934	-0.631133	0.123905	BnaA01g08930D [Brassica napus]	-	-	-	-	-	GO:0003676//nucleic acid binding;GO:0000166//nucleotide binding;GO:0097159//organic cyclic compound binding;GO:1901265//nucleoside phosphate binding;GO:1901363//heterocyclic compound binding;GO:0036094//small molecule binding;GO:0005488//binding	-
BnaA01g08990D	18.4333	7.16	0.473333	0.166667	49.7033	11.3533	1.40333	0.283333	-1.50589	0.0343479	-2.30829	0.000987622	PREDICTED: probable WRKY transcription factor 28 isoform X2 [Brassica napus]	-	-	-	-	GO:0005622//intracellular;GO:0043229//intracellular organelle;GO:0043226//organelle;GO:0043227//membrane-bounded organelle;GO:0043231//intracellular membrane-bounded organelle;GO:0044424//intracellular part;GO:0044464//cell part;GO:0005623//cell	GO:0043565//sequence-specific DNA binding;GO:0003700//transcription factor activity, sequence-specific DNA binding;GO:0005488//binding;GO:0097159//organic cyclic compound binding;GO:0003677//DNA binding;GO:0003676//nucleic acid binding;GO:0001071//nucleic acid binding transcription factor activity;GO:1901363//heterocyclic compound binding	GO:0009987//cellular process;GO:0006139//nucleobase-containing compound metabolic process;GO:0006811//ion transport;GO:0010467//gene expression;GO:0010033//response to organic substance;GO:1902578//single-organism localization;GO:1901576//organic substance biosynthetic process;GO:0014070//response to organic cyclic compound;GO:0043170//macromolecule metabolic process;GO:0006725//cellular aromatic…
BnaA01g09030D	54.4233	11.1267	3.16	0.59	52.28	15.6667	3.42333	0.92	-2.42114	3.89e-09	-1.8957	5.48269e-05	BnaA01g09030D [Brassica napus]	Metabolism	Glycan biosynthesis and metabolism;Global and Overview	ko01100//Metabolic pathways;ko00510//N-Glycan biosynthesis	K07441	-	-	-
BnaA01g09040D	72.9333	37.2833	1.36667	0.646667	65.97	39.6	1.39333	0.756667	-1.07957	0.00257884	-0.880811	0.0273374	BnaA01g09040D [Brassica napus]	-	-	-	-	-	GO:0036094//small molecule binding;GO:0005488//binding;GO:1901265//nucleoside phosphate binding;GO:0000166//nucleotide binding;GO:0097159//organic cyclic compound binding;GO:0003676//nucleic acid binding;GO:1901363//heterocyclic compound binding	-
BnaA01g09060D	73.9933	19.11	2.05	0.48	65.3067	32.3867	1.99333	0.906667	-2.09452	2.68e-09	-1.13654	0.00955599	BnaA01g09060D [Brassica napus]	-	-	-	-	GO:0016020//membrane	GO:0005216//ion channel activity;GO:0022857//transmembrane transporter activity;GO:0015075//ion transmembrane transporter activity;GO:0005244//voltage-gated ion channel activity;GO:0005267//potassium channel activity;GO:0022803//passive transmembrane transporter activity;GO:0022843//voltage-gated cation channel activity;GO:0022836//gated channel activity;GO:0005249//voltage-gated potassium channe…	GO:0006810//transport;GO:0044763//single-organism cellular process;GO:0044765//single-organism transport;GO:0006812//cation transport;GO:0006811//ion transport;GO:0009987//cellular process;GO:0051179//localization;GO:0006813//potassium ion transport;GO:1902578//single-organism localization;GO:0044699//single-organism process;GO:0051234//establishment of localization;GO:0015672//monovalent inorgan…
BnaA01g09110D	369.31	117.583	20.6367	6.04333	283.497	127.663	17.5867	7.39667	-1.77179	1.61e-12	-1.24953	3.77543e-05	BnaA01g09110D [Brassica napus]	-	-	-	-	-	GO:0008236//serine-type peptidase activity;GO:0017171//serine hydrolase activity;GO:0008233//peptidase activity;GO:0016787//hydrolase activity;GO:0070011//peptidase activity, acting on L-amino acid peptides;GO:0003824//catalytic activity;GO:0004252//serine-type endopeptidase activity;GO:0004175//endopeptidase activity	GO:0044238//primary metabolic process;GO:0006508//proteolysis;GO:0043170//macromolecule metabolic process;GO:0008152//metabolic process;GO:0071704//organic substance metabolic process;GO:0019538//protein metabolic process
BnaA01g09120D	33.5067	24.27	3.54333	2.27667	44.8433	22.3533	5.26333	2.39667	-0.638184	0.262597	-1.13495	0.0117395	BnaC01g10800D [Brassica napus]	-	-	-	-	GO:0044424//intracellular part;GO:0043231//intracellular membrane-bounded organelle;GO:0005623//cell;GO:0005622//intracellular;GO:0043229//intracellular organelle;GO:0044464//cell part;GO:0043226//organelle;GO:0043227//membrane-bounded organelle	-	-
BnaA01g09130D	40.9967	0.333333	1.15	0.01	34.3133	1.66667	1.06667	0.05	-6.84549	1.09e-17	-4.41504	7.1611e-11	BnaA01g09130D [Brassica napus]	-	-	-	-	GO:0043231//intracellular membrane-bounded organelle;GO:0043226//organelle;GO:0005622//intracellular;GO:0044464//cell part;GO:0043229//intracellular organelle;GO:0044424//intracellular part;GO:0043227//membrane-bounded organelle;GO:0005623//cell	GO:0003723//RNA binding;GO:1901363//heterocyclic compound binding;GO:0097159//organic cyclic compound binding;GO:0005488//binding;GO:0003676//nucleic acid binding	-
BnaA01g09160D	161.753	67.6667	12.7667	4.86667	132.557	75.0767	11.61	6.00333	-1.39138	1.06e-07	-0.951532	0.00388622	BnaA01g09160D [Brassica napus]	-	-	-	-	GO:0005622//intracellular;GO:0043231//intracellular membrane-bounded organelle;GO:0044424//intracellular part;GO:0043226//organelle;GO:0005623//cell;GO:0043229//intracellular organelle;GO:0043227//membrane-bounded organelle;GO:0044464//cell part	-	GO:0046483//heterocycle metabolic process;GO:0071704//organic substance metabolic process;GO:0034654//nucleobase-containing compound biosynthetic process;GO:0010467//gene expression;GO:0071840//cellular component organization or biogenesis;GO:0048827//phyllome development;GO:0008152//metabolic process;GO:0040034//regulation of development, heterochronic;GO:0097659//nucleic acid-templated transcri…
BnaA01g09220D	61.13	24	2.02667	0.723333	72.0267	17.5167	2.62667	0.586667	-1.48638	2.44e-05	-2.16262	5.48669e-05	BnaA01g09220D [Brassica napus]	Metabolism	Nucleotide metabolism;Amino acid metabolism;Global and Overview	ko01100//Metabolic pathways;ko01110//Biosynthesis of secondary metabolites;ko01130//Biosynthesis of antibiotics;ko00230//Purine metabolism;ko00250//Alanine, aspartate and glutamate metabolism	K01756	-	GO:0003824//catalytic activity	GO:0046390//ribose phosphate biosynthetic process;GO:0006796//phosphate-containing compound metabolic process;GO:0006807//nitrogen compound metabolic process;GO:0009058//biosynthetic process;GO:0019693//ribose phosphate metabolic process;GO:0006793//phosphorus metabolic process;GO:0009167//purine ribonucleoside monophosphate metabolic process;GO:0009165//nucleotide biosynthetic process;GO:0044711…
BnaA01g09240D	5.66667	0.666667	0.236667	0.0233333	0.666667	3.33333	0.03	0.136667	-3.34239	0.0077453	2.18763	0.329867	SNI1 [Arabidopsis thaliana]	-	-	-	-	GO:0005623//cell;GO:0043227//membrane-bounded organelle;GO:0044464//cell part;GO:0044424//intracellular part;GO:0043231//intracellular membrane-bounded organelle;GO:0043226//organelle;GO:0043229//intracellular organelle;GO:0005622//intracellular	GO:0003677//DNA binding;GO:0001067//regulatory region nucleic acid binding;GO:0003676//nucleic acid binding;GO:0000975//regulatory region DNA binding;GO:1901363//heterocyclic compound binding;GO:0005488//binding;GO:0097159//organic cyclic compound binding	GO:0048608//reproductive structure development;GO:0050789//regulation of biological process;GO:0016569//covalent chromatin modification;GO:0009628//response to abiotic stimulus;GO:0044767//single-organism developmental process;GO:0043412//macromolecule modification;GO:0000003//reproduction;GO:0098542//defense response to other organism;GO:0034645//cellular macromolecule biosynthetic process;GO:00…
BnaA01g09250D	59	26	4.02667	1.60667	69.4167	19	5.22333	1.35333	-1.32552	0.000246954	-1.94845	2.76167e-06	PREDICTED: D-tyrosyl-tRNA(Tyr) deacylase-like isoform X1 [Brassica napus]	-	-	-	-	GO:0005623//cell;GO:0005737//cytoplasm;GO:0044464//cell part;GO:0044424//intracellular part;GO:0005622//intracellular	-	GO:0046416//D-amino acid metabolic process;GO:0071704//organic substance metabolic process;GO:0006807//nitrogen compound metabolic process;GO:0019752//carboxylic acid metabolic process;GO:1901565//organonitrogen compound catabolic process;GO:1901575//organic substance catabolic process;GO:0019478//D-amino acid catabolic process;GO:0009056//catabolic process;GO:0009063//cellular amino acid catabol…
BnaA01g09260D	92.0567	39.1	2.28	0.883333	53.4833	18.5933	1.48333	0.48	-1.368	3.93e-05	-1.62774	0.000100638	BnaA01g09260D [Brassica napus]	-	-	-	-	-	GO:0032559//adenyl ribonucleotide binding;GO:0000166//nucleotide binding;GO:0003824//catalytic activity;GO:1901265//nucleoside phosphate binding;GO:0016787//hydrolase activity;GO:0097159//organic cyclic compound binding;GO:0097367//carbohydrate derivative binding;GO:0016887//ATPase activity;GO:0004386//helicase activity;GO:0016817//hydrolase activity, acting on acid anhydrides;GO:0003676//nucleic…	-
BnaA01g09310D	6.33333	7.33333	0.22	0.236667	5	0	0.2	0.001	0.105353	1	-7.64386	0.00592008	BnaA01g09310D [Brassica napus]	-	-	-	-	-	-	-
BnaA01g09360D	215.063	1142.18	7.63333	36.93	289.513	657.6	11.4833	25.0033	2.27441	3.71e-20	1.12258	0.00178986	BnaA01g09360D [Brassica napus]	-	-	-	-	-	-	-
BnaA01g09370D	206.053	19.71	5.76	0.506667	142.64	17.9333	4.40667	0.5	-3.50696	1.58e-27	-3.13969	5.98341e-16	BnaA01g09370D [Brassica napus]	-	-	-	-	-	-	-
BnaA01g09390D	80.3533	49.26	5.40667	3.07	78.8233	31.7633	5.95	2.19667	-0.816501	0.0154751	-1.43757	0.000545494	PREDICTED: replication protein A 14 kDa subunit B [Brassica rapa]	Genetic Information Processing	Replication and repair	ko03420//Nucleotide excision repair;ko03030//DNA replication;ko03440//Homologous recombination;ko03430//Mismatch repair	K10740	-	-	-
BnaA01g09400D	76.5467	36.2133	6.43	2.88667	52.73	28.6667	4.96333	2.48333	-1.15541	0.00676103	-0.999031	0.0165524	PREDICTED: probable inactive dual specificity protein phosphatase-like At4g18593 [Brassica rapa]	-	-	-	-	GO:0005622//intracellular;GO:0005623//cell;GO:0044464//cell part;GO:0043231//intracellular membrane-bounded organelle;GO:0043226//organelle;GO:0044424//intracellular part;GO:0043229//intracellular organelle;GO:0043227//membrane-bounded organelle	GO:0004721//phosphoprotein phosphatase activity;GO:0016791//phosphatase activity;GO:0042578//phosphoric ester hydrolase activity;GO:0016787//hydrolase activity;GO:0016788//hydrolase activity, acting on ester bonds;GO:0008138//protein tyrosine/serine/threonine phosphatase activity;GO:0003824//catalytic activity	GO:0008152//metabolic process;GO:0071704//organic substance metabolic process;GO:0036211//protein modification process;GO:0006793//phosphorus metabolic process;GO:0009987//cellular process;GO:0019538//protein metabolic process;GO:0006464//cellular protein modification process;GO:0044267//cellular protein metabolic process;GO:0043412//macromolecule modification;GO:0044237//cellular metabolic proce…
BnaA01g09420D	77.95	7.40667	1.61667	0.136667	62.42	16.3733	1.45333	0.333333	-3.56429	1.76e-15	-2.12433	3.78984e-05	BnaA01g09420D [Brassica napus]	-	-	-	-	-	-	-
BnaA01g09430D	57.7333	9	1.52333	0.213333	47.0667	4.02667	1.37667	0.103333	-2.83605	3.65e-09	-3.7358	1.70766e-10	PREDICTED: scar-like domain-containing protein WAVE 5 [Brassica rapa]	-	-	-	-	-	-	-
BnaA01g09470D	54.3333	11	1.77333	0.32	36.5067	16.3333	1.30333	0.543333	-2.47032	1.07e-08	-1.2623	0.0108461	BnaA01g09470D [Brassica napus]	-	-	-	-	GO:0044424//intracellular part;GO:0043229//intracellular organelle;GO:0044464//cell part;GO:0005623//cell;GO:0043227//membrane-bounded organelle;GO:0043226//organelle;GO:0005622//intracellular;GO:0043231//intracellular membrane-bounded organelle	-	-
BnaA01g09480D	77.1467	29.2367	1.80333	0.616667	52.5833	29.39	1.35667	0.683333	-1.5481	6.04e-06	-0.989405	0.0296837	BnaA01g09480D [Brassica napus]	-	-	-	-	-	GO:0016772//transferase activity, transferring phosphorus-containing groups;GO:0001883//purine nucleoside binding;GO:0005524//ATP binding;GO:1901265//nucleoside phosphate binding;GO:0016773//phosphotransferase activity, alcohol group as acceptor;GO:0036094//small molecule binding;GO:0032550//purine ribonucleoside binding;GO:0032559//adenyl ribonucleotide binding;GO:0005488//binding;GO:0004713//pr…	GO:0036211//protein modification process;GO:0044238//primary metabolic process;GO:0006793//phosphorus metabolic process;GO:0009987//cellular process;GO:0016310//phosphorylation;GO:0043412//macromolecule modification;GO:0044237//cellular metabolic process;GO:0019538//protein metabolic process;GO:0006468//protein phosphorylation;GO:0006796//phosphate-containing compound metabolic process;GO:0043170…
BnaA01g09490D	0	4.81333	0.001	0.346667	0	0.716667	0.001	0.0633333	8.43741	0.00460915	5.98489	0.688792	PREDICTED: transcription factor TGAL3 [Brassica rapa]	-	-	-	-	-	-	-
BnaA01g09510D	14.46	1.37333	1.12333	0.1	6.92667	0	0.583333	0.001	-3.48971	0.00398461	-9.18818	0.00715576	BnaA01g09510D [Brassica napus]	-	-	-	-	GO:0043226//organelle;GO:0043231//intracellular membrane-bounded organelle;GO:0005622//intracellular;GO:0043227//membrane-bounded organelle;GO:0005623//cell;GO:0043229//intracellular organelle;GO:0044464//cell part;GO:0044424//intracellular part	GO:0003676//nucleic acid binding;GO:0005488//binding;GO:0043565//sequence-specific DNA binding;GO:0097159//organic cyclic compound binding;GO:1901363//heterocyclic compound binding;GO:0003677//DNA binding;GO:0003700//transcription factor activity, sequence-specific DNA binding;GO:0001071//nucleic acid binding transcription factor activity	GO:0044271//cellular nitrogen compound biosynthetic process;GO:0006139//nucleobase-containing compound metabolic process;GO:0009059//macromolecule biosynthetic process;GO:0018130//heterocycle biosynthetic process;GO:0006725//cellular aromatic compound metabolic process;GO:0010467//gene expression;GO:0044237//cellular metabolic process;GO:0044249//cellular biosynthetic process;GO:0019438//aromatic…
BnaA01g09520D	203.507	585.66	8.29	21.6333	122.667	811.093	5.54	34	1.38381	2.56e-08	2.61758	3.95997e-18	BnaA01g09520D [Brassica napus]	Cellular Processes	Transport and catabolism	ko04140//Regulation of autophagy	K07198	-	GO:0043167//ion binding;GO:0000166//nucleotide binding;GO:0016772//transferase activity, transferring phosphorus-containing groups;GO:0005488//binding;GO:0032559//adenyl ribonucleotide binding;GO:1901363//heterocyclic compound binding;GO:0004713//protein tyrosine kinase activity;GO:0043168//anion binding;GO:0030554//adenyl nucleotide binding;GO:0004674//protein serine/threonine kinase activity;GO…	GO:0006468//protein phosphorylation;GO:0044700//single organism signaling;GO:0044699//single-organism process;GO:0036211//protein modification process;GO:0071704//organic substance metabolic process;GO:0044237//cellular metabolic process;GO:0019932//second-messenger-mediated signaling;GO:0051716//cellular response to stimulus;GO:0006796//phosphate-containing compound metabolic process;GO:0006793/…
BnaA01g09570D	5.33333	1	0.226667	0.0433333	7.33333	1.33333	0.36	0.0533333	-2.38702	0.0557889	-2.75489	0.0318227	BnaA01g09570D [Brassica napus]	-	-	-	-	GO:0016020//membrane	GO:0005515//protein binding;GO:0005488//binding	GO:0009987//cellular process;GO:0044763//single-organism cellular process;GO:0007154//cell communication;GO:0044699//single-organism process
BnaA01g09640D	725.26	2068.55	18.11	46.99	517.537	1981.69	14.3433	50.51	1.37557	1.04e-08	1.81619	2.72247e-13	BnaA01g09640D [Brassica napus]	-	-	-	-	GO:0044464//cell part;GO:0005623//cell;GO:0009532//plastid stroma;GO:0044422//organelle part;GO:0043231//intracellular membrane-bounded organelle;GO:0044444//cytoplasmic part;GO:0043226//organelle;GO:0005622//intracellular;GO:0005737//cytoplasm;GO:0044446//intracellular organelle part;GO:0043229//intracellular organelle;GO:0009536//plastid;GO:0044424//intracellular part;GO:0044435//plastid part;G…	GO:1901265//nucleoside phosphate binding;GO:0000166//nucleotide binding;GO:0097159//organic cyclic compound binding;GO:0036094//small molecule binding;GO:1901363//heterocyclic compound binding;GO:0005488//binding	GO:0044260//cellular macromolecule metabolic process;GO:0048856//anatomical structure development;GO:0032502//developmental process;GO:0071704//organic substance metabolic process;GO:0016070//RNA metabolic process;GO:0009886//post-embryonic morphogenesis;GO:0034641//cellular nitrogen compound metabolic process;GO:1901360//organic cyclic compound metabolic process;GO:0009653//anatomical structure …
BnaA01g09650D	287.99	139.183	4.86	2.11333	191.357	151.163	3.57667	2.59333	-1.20144	2.55e-06	-0.463808	0.129328	BnaA01g09650D [Brassica napus]	-	-	-	-	GO:0005623//cell;GO:1990234//transferase complex;GO:0043234//protein complex;GO:1902494//catalytic complex;GO:0044424//intracellular part;GO:0042575//DNA polymerase complex;GO:0044464//cell part;GO:0061695//transferase complex, transferring phosphorus-containing groups;GO:0009360//DNA polymerase III complex;GO:0005622//intracellular;GO:0032991//macromolecular complex	GO:0016740//transferase activity;GO:0034061//DNA polymerase activity;GO:0005488//binding;GO:0032549//ribonucleoside binding;GO:0032550//purine ribonucleoside binding;GO:1901363//heterocyclic compound binding;GO:0017111//nucleoside-triphosphatase activity;GO:0016772//transferase activity, transferring phosphorus-containing groups;GO:0030554//adenyl nucleotide binding;GO:0016818//hydrolase activity…	GO:0071704//organic substance metabolic process;GO:0044238//primary metabolic process;GO:0009059//macromolecule biosynthetic process;GO:0006807//nitrogen compound metabolic process;GO:0044237//cellular metabolic process;GO:0006259//DNA metabolic process;GO:0006139//nucleobase-containing compound metabolic process;GO:0009058//biosynthetic process;GO:0034641//cellular nitrogen compound metabolic pr…
BnaA01g09690D	269.83	123.667	8.22667	3.49333	509.333	129.333	17.62	4.07667	-1.2357	0.000272339	-2.11175	8.07166e-12	BnaA01g09690D [Brassica napus]	-	-	-	-	GO:0005623//cell;GO:0043226//organelle;GO:0043227//membrane-bounded organelle;GO:0005634//nucleus;GO:0044424//intracellular part;GO:0043231//intracellular membrane-bounded organelle;GO:0005622//intracellular;GO:0044464//cell part;GO:0043229//intracellular organelle	GO:0005488//binding;GO:0043565//sequence-specific DNA binding;GO:0097159//organic cyclic compound binding;GO:0003700//transcription factor activity, sequence-specific DNA binding;GO:0001071//nucleic acid binding transcription factor activity;GO:1901363//heterocyclic compound binding;GO:0003677//DNA binding;GO:0003676//nucleic acid binding	GO:0009719//response to endogenous stimulus;GO:0065007//biological regulation;GO:0006950//response to stress;GO:0042221//response to chemical;GO:0002252//immune effector process;GO:0044700//single organism signaling;GO:0010243//response to organonitrogen compound;GO:0009987//cellular process;GO:0007154//cell communication;GO:0044699//single-organism process;GO:0051716//cellular response to stimul…
BnaA01g09700D	131.333	51.9967	6.14333	2.22	136.973	40.6667	7.12	1.88333	-1.46846	2.49e-06	-1.91859	5.35386e-07	PREDICTED: BES1/BZR1 homolog protein 3 [Brassica rapa]	-	-	-	-	-	-	GO:1901576//organic substance biosynthetic process;GO:0009628//response to abiotic stimulus;GO:0006807//nitrogen compound metabolic process;GO:0050896//response to stimulus;GO:0001101//response to acid chemical;GO:0042221//response to chemical;GO:0044238//primary metabolic process;GO:0043170//macromolecule metabolic process;GO:1901362//organic cyclic compound biosynthetic process;GO:0071704//orga…
BnaA01g09720D	145.667	25.3333	6.86	1.11333	73	9.66667	3.88333	0.47	-2.62332	3.16e-14	-3.04656	9.89249e-12	BnaA01g09720D [Brassica napus]	-	-	-	-	GO:0016020//membrane	GO:0005215//transporter activity;GO:0008509//anion transmembrane transporter activity;GO:0022857//transmembrane transporter activity;GO:0015075//ion transmembrane transporter activity;GO:0005372//water transmembrane transporter activity;GO:0015103//inorganic anion transmembrane transporter activity;GO:0022892//substrate-specific transporter activity;GO:0022891//substrate-specific transmembrane tr…	GO:0071702//organic substance transport;GO:0051234//establishment of localization;GO:0055085//transmembrane transport;GO:0042221//response to chemical;GO:0051179//localization;GO:0015698//inorganic anion transport;GO:0006820//anion transport;GO:1902578//single-organism localization;GO:0050896//response to stimulus;GO:0042886//amide transport;GO:0009987//cellular process;GO:0071705//nitrogen compo…
BnaA01g09730D	291.333	141.21	10.12	4.47333	292.497	156.667	11.2533	5.57667	-1.17779	6.86e-07	-1.01288	0.000317714	BnaA01g09730D [Brassica napus]	-	-	-	-	GO:0043226//organelle;GO:0043231//intracellular membrane-bounded organelle;GO:0043229//intracellular organelle;GO:0044464//cell part;GO:0005623//cell;GO:0005622//intracellular;GO:0044424//intracellular part;GO:0043227//membrane-bounded organelle	GO:0016788//hydrolase activity, acting on ester bonds;GO:0016787//hydrolase activity;GO:0008081//phosphoric diester hydrolase activity;GO:0004112//cyclic-nucleotide phosphodiesterase activity;GO:0003824//catalytic activity;GO:0042578//phosphoric ester hydrolase activity	GO:0090304//nucleic acid metabolic process;GO:0006807//nitrogen compound metabolic process;GO:0006725//cellular aromatic compound metabolic process;GO:0046483//heterocycle metabolic process;GO:0009987//cellular process;GO:1901360//organic cyclic compound metabolic process;GO:0008152//metabolic process;GO:0043170//macromolecule metabolic process;GO:0044237//cellular metabolic process;GO:0034641//c…
BnaA01g09740D	323.457	4380.37	10.3867	129.273	538.133	2036.57	19.27	69.0567	3.63762	1.13e-33	1.84142	4.57414e-09	BnaA01g09740D [Brassica napus]	-	-	-	-	GO:0043226//organelle;GO:0044424//intracellular part;GO:0005622//intracellular;GO:0044444//cytoplasmic part;GO:0005737//cytoplasm;GO:0043231//intracellular membrane-bounded organelle;GO:0005623//cell;GO:0043229//intracellular organelle;GO:0043227//membrane-bounded organelle;GO:0044464//cell part	GO:0097367//carbohydrate derivative binding;GO:0004713//protein tyrosine kinase activity;GO:0000166//nucleotide binding;GO:0005488//binding;GO:0017076//purine nucleotide binding;GO:0043168//anion binding;GO:0001883//purine nucleoside binding;GO:0030554//adenyl nucleotide binding;GO:0032550//purine ribonucleoside binding;GO:0001882//nucleoside binding;GO:0005524//ATP binding;GO:0005515//protein bi…	GO:0009719//response to endogenous stimulus;GO:0006796//phosphate-containing compound metabolic process;GO:0044763//single-organism cellular process;GO:0019538//protein metabolic process;GO:0008219//cell death;GO:0050794//regulation of cellular process;GO:0071702//organic substance transport;GO:0046907//intracellular transport;GO:0006082//organic acid metabolic process;GO:0051649//establishment o…
BnaA01g09770D	358.333	137.333	18.22	6.41667	270.333	101	15.3067	5.34333	-1.50563	6.85e-10	-1.51835	9.3861e-08	PREDICTED: pentatricopeptide repeat-containing protein At4g18975, chloroplastic-like [Brassica napus]	-	-	-	-	GO:0044464//cell part;GO:0009536//plastid;GO:0044424//intracellular part;GO:0043229//intracellular organelle;GO:0005737//cytoplasm;GO:0005622//intracellular;GO:0043227//membrane-bounded organelle;GO:0005623//cell;GO:0043226//organelle;GO:0043231//intracellular membrane-bounded organelle;GO:0044444//cytoplasmic part	-	-
BnaA01g09820D	159.553	81.3267	2.76	1.28	121.563	32.53	2.32667	0.573333	-1.10852	0.000126592	-2.02082	1.00623e-07	BnaA01g09820D [Brassica napus]	Metabolism	Global and Overview;Amino acid metabolism	ko01100//Metabolic pathways;ko00270//Cysteine and methionine metabolism	K00558	GO:0044424//intracellular part;GO:0043226//organelle;GO:0005634//nucleus;GO:0005623//cell;GO:0043227//membrane-bounded organelle;GO:0005622//intracellular;GO:0044464//cell part;GO:0043229//intracellular organelle;GO:0043231//intracellular membrane-bounded organelle	GO:0016741//transferase activity, transferring one-carbon groups;GO:0097159//organic cyclic compound binding;GO:0003824//catalytic activity;GO:0003677//DNA binding;GO:0008168//methyltransferase activity;GO:0016740//transferase activity;GO:1901363//heterocyclic compound binding;GO:0003676//nucleic acid binding;GO:0005488//binding	GO:0044260//cellular macromolecule metabolic process;GO:0043414//macromolecule methylation;GO:0009987//cellular process;GO:0034641//cellular nitrogen compound metabolic process;GO:0032259//methylation;GO:0090304//nucleic acid metabolic process;GO:0071704//organic substance metabolic process;GO:0043170//macromolecule metabolic process;GO:0044237//cellular metabolic process;GO:0006139//nucleobase-c…
BnaA01g09840D	227.307	155.817	3.54333	2.24333	310.973	126.307	5.41	1.97667	-0.659463	0.0105123	-1.45256	1.86008e-06	BnaA01g09840D [Brassica napus]	-	-	-	-	-	GO:0005488//binding;GO:0097159//organic cyclic compound binding;GO:0005515//protein binding;GO:0017076//purine nucleotide binding;GO:0032555//purine ribonucleotide binding;GO:1901363//heterocyclic compound binding;GO:0043168//anion binding;GO:0036094//small molecule binding;GO:0032559//adenyl ribonucleotide binding;GO:0097367//carbohydrate derivative binding;GO:0032550//purine ribonucleoside bind…	GO:0006950//response to stress;GO:0050896//response to stimulus;GO:0006952//defense response
BnaA01g09860D	490.783	5719.58	11.64	123.707	521.5	2347.58	13.6967	56.6867	3.40976	7.33e-48	2.04918	1.06568e-15	BnaA01g09860D [Brassica napus]	-	-	-	-	GO:0043226//organelle;GO:0044464//cell part;GO:0005623//cell;GO:0043229//intracellular organelle;GO:0005622//intracellular;GO:0044424//intracellular part;GO:0043227//membrane-bounded organelle;GO:0043231//intracellular membrane-bounded organelle	GO:0016740//transferase activity;GO:0016741//transferase activity, transferring one-carbon groups;GO:0003824//catalytic activity;GO:0008168//methyltransferase activity	GO:1901700//response to oxygen-containing compound;GO:0009415//response to water;GO:0008152//metabolic process;GO:0009628//response to abiotic stimulus;GO:0001101//response to acid chemical;GO:0050896//response to stimulus;GO:0042221//response to chemical;GO:0006950//response to stress;GO:0006970//response to osmotic stress;GO:0009414//response to water deprivation;GO:0010035//response to inorgan…
BnaA01g09890D	280.073	77.76	8.18667	2.09333	274.197	59.4833	8.93	1.75667	-1.96747	8.59e-15	-2.34582	5.48056e-15	BnaA01g09890D [Brassica napus]	-	-	-	-	GO:0043231//intracellular membrane-bounded organelle;GO:0043227//membrane-bounded organelle;GO:0044424//intracellular part;GO:0044464//cell part;GO:0005623//cell;GO:0043229//intracellular organelle;GO:0043226//organelle;GO:0044444//cytoplasmic part;GO:0009536//plastid;GO:0005737//cytoplasm;GO:0005622//intracellular	-	-
BnaA01g09900D	7095.71	615.413	199.163	15.9333	4181.62	1218.42	130.963	35.37	-3.64383	5.22e-24	-1.88856	2.21654e-07	BnaA01g09900D [Brassica napus]	Metabolism	Metabolism of terpenoids and polyketides;Global and Overview	ko01100//Metabolic pathways;ko01110//Biosynthesis of secondary metabolites;ko00906//Carotenoid biosynthesis	K09840	GO:0043231//intracellular membrane-bounded organelle;GO:0005737//cytoplasm;GO:0009570//chloroplast stroma;GO:0043226//organelle;GO:0044434//chloroplast part;GO:0044422//organelle part;GO:0044424//intracellular part;GO:0044444//cytoplasmic part;GO:0009532//plastid stroma;GO:0005623//cell;GO:0043227//membrane-bounded organelle;GO:0044446//intracellular organelle part;GO:0044464//cell part;GO:000953…	GO:0005488//binding	GO:0071704//organic substance metabolic process;GO:0009058//biosynthetic process;GO:1901576//organic substance biosynthetic process;GO:0008152//metabolic process;GO:0044699//single-organism process;GO:0009812//flavonoid metabolic process;GO:0044710//single-organism metabolic process;GO:0009813//flavonoid biosynthetic process
BnaA01g09940D	799.517	25959.2	45.8233	1359.6	779.773	5978.19	49.4667	339.623	4.89096	7.66e-46	2.77941	4.81984e-14	PREDICTED: glycine-rich protein A3 [Brassica rapa]	-	-	-	-	-	-	-
BnaA01g09980D	63.3333	19.6667	4.78	1.4	63.6667	2.33333	5.39667	0.2	-1.77158	0.00176504	-4.754	6.78296e-15	Profilin family protein [Arabidopsis thaliana]	-	-	-	-	GO:0005623//cell;GO:0005618//cell wall;GO:0071944//cell periphery;GO:0030054//cell junction;GO:0005911//cell-cell junction;GO:0030312//external encapsulating structure;GO:0044464//cell part	GO:0005515//protein binding;GO:0005488//binding;GO:0008092//cytoskeletal protein binding;GO:0003779//actin binding	GO:0006082//organic acid metabolic process;GO:0030029//actin filament-based process;GO:0044699//single-organism process;GO:0032787//monocarboxylic acid metabolic process;GO:0044763//single-organism cellular process;GO:0071704//organic substance metabolic process;GO:0044238//primary metabolic process;GO:0044281//small molecule metabolic process;GO:0019752//carboxylic acid metabolic process;GO:0006…
BnaA01g09990D	201.01	128.02	8.36667	4.88667	187.49	96.2267	8.68667	4.06667	-0.775802	0.00486778	-1.09496	0.000646877	PREDICTED: pectin acetylesterase 7-like [Brassica napus]	-	-	-	-	GO:0071944//cell periphery;GO:0044464//cell part;GO:0005618//cell wall;GO:0005911//cell-cell junction;GO:0005623//cell;GO:0030054//cell junction;GO:0030312//external encapsulating structure	-	-
BnaA01g10000D	566.557	138.387	19.5433	4.41	515.467	73.3033	19.9067	2.59333	-2.14783	1.62e-13	-2.94037	5.02967e-25	BnaA01g10000D [Brassica napus]	-	-	-	-	-	-	-
BnaA01g10020D	34.9867	25.0333	1.06667	0.703333	10.7833	31.89	0.373333	0.963333	-0.600829	0.213077	1.36757	0.0359421	BnaA01g10020D [Brassica napus]	-	-	-	-	-	-	-
BnaA01g10040D	123.037	20.1733	1.48333	0.22	135.383	14.4367	1.83	0.17	-2.75327	4.76e-15	-3.42824	5.59992e-15	BnaA01g10040D [Brassica napus]	-	-	-	-	-	GO:0032550//purine ribonucleoside binding;GO:1901265//nucleoside phosphate binding;GO:0030554//adenyl nucleotide binding;GO:0097159//organic cyclic compound binding;GO:0032559//adenyl ribonucleotide binding;GO:0046914//transition metal ion binding;GO:0043167//ion binding;GO:0005515//protein binding;GO:0000166//nucleotide binding;GO:0043531//ADP binding;GO:0032555//purine ribonucleotide binding;GO…	GO:0007154//cell communication;GO:0050789//regulation of biological process;GO:0050896//response to stimulus;GO:0044763//single-organism cellular process;GO:0009987//cellular process;GO:0006950//response to stress;GO:0023052//signaling;GO:0006952//defense response;GO:0050794//regulation of cellular process;GO:0065007//biological regulation;GO:0044699//single-organism process;GO:0044700//single or…
BnaA01g10060D	59	10.6667	2.52667	0.41	57.3333	2.67333	2.74	0.113333	-2.62354	5.9e-09	-4.59553	2.82589e-14	PREDICTED: iron-sulfur protein NUBPL-like [Brassica napus]	-	-	-	-	-	-	-
BnaA01g10070D	22.3333	2	0.99	0.0766667	14	0.666667	0.68	0.03	-3.69076	1.49e-07	-4.5025	4.39442e-05	BnaA01g10070D [Brassica napus]	-	-	-	-	-	GO:0019900//kinase binding;GO:0005488//binding;GO:0019899//enzyme binding;GO:0005515//protein binding;GO:0019901//protein kinase binding	GO:1904029//regulation of cyclin-dependent protein kinase activity;GO:0051246//regulation of protein metabolic process;GO:0050790//regulation of catalytic activity;GO:0001932//regulation of protein phosphorylation;GO:0031399//regulation of protein modification process;GO:0000079//regulation of cyclin-dependent protein serine/threonine kinase activity;GO:0043549//regulation of kinase activity;GO:0…
BnaA01g10200D	29.3333	9	0.906667	0.25	23.6667	5.33333	0.833333	0.18	-1.85864	0.00138186	-2.2109	0.00170746	BnaA01g10200D [Brassica napus]	-	-	-	-	-	-	-
BnaA01g10220D	520.95	202.47	13	4.64333	413.347	123.8	11.4567	3.11333	-1.48528	1.18e-10	-1.87966	4.35744e-11	PREDICTED: regulatory protein NPR4-like [Brassica napus]	Environmental Information Processing	Signal transduction	ko04075//Plant hormone signal transduction	K14508	-	GO:0005488//binding;GO:0005515//protein binding	-
BnaA01g10250D	10.36	3.22667	0.693333	0.203333	14.4333	5.56	1.09	0.383333	-1.7697	0.0213374	-1.50766	0.0307959	PREDICTED: patellin-6 [Brassica rapa]	-	-	-	-	GO:0044464//cell part;GO:0005623//cell;GO:0016020//membrane;GO:0005622//intracellular	GO:0005215//transporter activity	GO:0051234//establishment of localization;GO:0051179//localization;GO:0006810//transport
BnaA01g10270D	568.057	246.59	15.9633	6.36667	413.617	332.373	12.9633	9.45667	-1.32615	2.74e-08	-0.455033	0.161291	PREDICTED: lecithin-cholesterol acyltransferase-like 4 [Brassica napus]	-	-	-	-	-	GO:0016740//transferase activity;GO:0008374//O-acyltransferase activity;GO:0016746//transferase activity, transferring acyl groups;GO:0003824//catalytic activity;GO:0016747//transferase activity, transferring acyl groups other than amino-acyl groups	GO:0044238//primary metabolic process;GO:0044699//single-organism process;GO:0008152//metabolic process;GO:0006629//lipid metabolic process;GO:0071704//organic substance metabolic process;GO:0044710//single-organism metabolic process
BnaA01g10280D	1188.89	476.643	12.0167	4.39333	1121.74	536.767	12.6033	5.51667	-1.45165	1.15e-08	-1.19194	3.06178e-06	BnaA01g10280D [Brassica napus]	Genetic Information Processing	Transcription	ko03040//Spliceosome	K12856	GO:0005623//cell;GO:0005681//spliceosomal complex;GO:0005622//intracellular;GO:0005634//nucleus;GO:0044428//nuclear part;GO:0030529//intracellular ribonucleoprotein complex;GO:0043227//membrane-bounded organelle;GO:1990904//ribonucleoprotein complex;GO:0043226//organelle;GO:0044422//organelle part;GO:0043231//intracellular membrane-bounded organelle;GO:0044424//intracellular part;GO:0032991//macr…	GO:0005488//binding;GO:0005515//protein binding	-
BnaA01g10310D	17.0933	530.277	0.39	11.14	30.5633	356.607	0.803333	8.59667	4.83613	1.23e-49	3.41971	1.6322e-21	BnaA01g10310D [Brassica napus]	-	-	-	-	GO:0016020//membrane	GO:0022892//substrate-specific transporter activity;GO:0022857//transmembrane transporter activity;GO:0015075//ion transmembrane transporter activity;GO:0005215//transporter activity;GO:0022890//inorganic cation transmembrane transporter activity;GO:0046873//metal ion transmembrane transporter activity;GO:0015077//monovalent inorganic cation transmembrane transporter activity;GO:0008324//cation t…	GO:0051234//establishment of localization;GO:0006811//ion transport;GO:0044763//single-organism cellular process;GO:1902578//single-organism localization;GO:0030001//metal ion transport;GO:0051179//localization;GO:0098662//inorganic cation transmembrane transport;GO:0034220//ion transmembrane transport;GO:0006812//cation transport;GO:0044765//single-organism transport;GO:0015672//monovalent inorg…
BnaA01g10340D	82.6667	30.6667	4.57667	1.52	60.3333	20.3333	3.69333	1.13667	-1.59023	4.66e-05	-1.70011	3.66363e-05	PREDICTED: uncharacterized N-acetyltransferase ycf52-like isoform X1 [Brassica napus]	-	-	-	-	-	GO:0016740//transferase activity;GO:0016410//N-acyltransferase activity;GO:0016746//transferase activity, transferring acyl groups;GO:0016407//acetyltransferase activity;GO:0016747//transferase activity, transferring acyl groups other than amino-acyl groups;GO:0008080//N-acetyltransferase activity;GO:0003824//catalytic activity	GO:0048731//system development;GO:0044707//single-multicellular organism process;GO:0009887//organ morphogenesis;GO:0048513//animal organ development;GO:0044763//single-organism cellular process;GO:0007275//multicellular organism development;GO:0044699//single-organism process;GO:0009987//cellular process;GO:0032501//multicellular organismal process;GO:0048869//cellular developmental process;GO:0…
BnaA01g10360D	174.457	45.7067	6.52333	1.55333	170.257	107.853	7.03	4	-2.07024	2.77e-13	-0.813525	0.0485489	BnaA01g10360D [Brassica napus]	-	-	-	-	-	-	-
BnaA01g10400D	45.3333	17.3333	0.77	0.266667	30.3333	16.6667	0.566667	0.286667	-1.52982	0.00029956	-0.983126	0.0566837	BnaA01g10400D [Brassica napus]	-	-	-	-	-	GO:0005488//binding	GO:0043170//macromolecule metabolic process;GO:0009987//cellular process;GO:0003006//developmental process involved in reproduction;GO:0071554//cell wall organization or biogenesis;GO:0044237//cellular metabolic process;GO:0010410//hemicellulose metabolic process;GO:0044260//cellular macromolecule metabolic process;GO:0008152//metabolic process;GO:0000003//reproduction;GO:0005976//polysaccharide …
BnaA01g10410D	31.7367	19.7433	0.893333	0.506667	58	5.93333	1.78667	0.173333	-0.818162	0.112496	-3.36565	4.32255e-11	BnaA01g10410D [Brassica napus]	-	-	-	-	-	GO:0005515//protein binding;GO:0005488//binding	GO:0022414//reproductive process;GO:0003006//developmental process involved in reproduction;GO:0000003//reproduction;GO:0032502//developmental process
BnaA01g10440D	3	1.66667	0.0966667	0.05	5.66667	0	0.213333	0.001	-0.95109	0.79693	-7.73697	0.00135788	BnaA01g10440D [Brassica napus]	-	-	-	-	GO:0043229//intracellular organelle;GO:0005739//mitochondrion;GO:0031975//envelope;GO:0044425//membrane part;GO:0009536//plastid;GO:0016020//membrane;GO:0044424//intracellular part;GO:0044446//intracellular organelle part;GO:0005773//vacuole;GO:0044455//mitochondrial membrane part;GO:0044422//organelle part;GO:0031966//mitochondrial membrane;GO:0044429//mitochondrial part;GO:0043227//membrane-bou…	-	GO:0071840//cellular component organization or biogenesis;GO:0051603//proteolysis involved in cellular protein catabolic process;GO:0035966//response to topologically incorrect protein;GO:0044248//cellular catabolic process;GO:0010035//response to inorganic substance;GO:0043632//modification-dependent macromolecule catabolic process;GO:0009056//catabolic process;GO:0065003//macromolecular complex…
BnaA01g10480D	49.3333	24	1.63	0.736667	34	11	1.22333	0.36	-1.14579	0.0651874	-1.76475	0.025787	Cytochrome P450 71A15, partial [Noccaea caerulescens]	Metabolism	Biosynthesis of other secondary metabolites;Metabolism of terpenoids and polyketides;Global and Overview	ko01100//Metabolic pathways;ko01110//Biosynthesis of secondary metabolites;ko01120//Microbial metabolism in diverse environments;ko00945//Stilbenoid, diarylheptanoid and gingerol biosynthesis;ko00903//Limonene and pinene degradation	K00517	-	GO:0043169//cation binding;GO:0009055//electron carrier activity;GO:0020037//heme binding;GO:0043167//ion binding;GO:1901363//heterocyclic compound binding;GO:0005506//iron ion binding;GO:0097159//organic cyclic compound binding;GO:0046906//tetrapyrrole binding;GO:0046872//metal ion binding;GO:0005488//binding;GO:0046914//transition metal ion binding	GO:0055114//oxidation-reduction process;GO:0044710//single-organism metabolic process;GO:0008152//metabolic process;GO:0044699//single-organism process
BnaA01g10490D	159.083	89.4767	8.90667	4.53667	229.857	114.183	14.3633	6.71667	-0.973253	0.00224549	-1.09657	0.000482289	PREDICTED: transcription initiation factor TFIID subunit 11-like [Brassica napus]	Genetic Information Processing	Transcription	ko03022//Basal transcription factors	K03135	GO:0005623//cell;GO:0043231//intracellular membrane-bounded organelle;GO:0043227//membrane-bounded organelle;GO:0005622//intracellular;GO:0043226//organelle;GO:0043229//intracellular organelle;GO:0044464//cell part;GO:0044424//intracellular part;GO:0005634//nucleus	GO:0046982//protein heterodimerization activity;GO:0046983//protein dimerization activity;GO:0005515//protein binding;GO:0005488//binding	GO:0019752//carboxylic acid metabolic process;GO:0006366//transcription from RNA polymerase II promoter;GO:0044763//single-organism cellular process;GO:0046483//heterocycle metabolic process;GO:0044237//cellular metabolic process;GO:0044281//small molecule metabolic process;GO:0044699//single-organism process;GO:0044711//single-organism biosynthetic process;GO:0008152//metabolic process;GO:004427…
BnaA01g10510D	64.2233	32.3867	1.96333	0.91	51.3333	46.6667	1.74	1.46667	-1.10937	0.00118597	-0.246546	0.604014	BnaA01g10510D [Brassica napus]	Genetic Information Processing	Folding, sorting and degradation	ko04141//Protein processing in endoplasmic reticulum	K07765	GO:0016020//membrane	GO:0008237//metallopeptidase activity;GO:0004175//endopeptidase activity;GO:0008233//peptidase activity;GO:0003824//catalytic activity;GO:0016787//hydrolase activity;GO:0070011//peptidase activity, acting on L-amino acid peptides;GO:0004222//metalloendopeptidase activity	GO:0008152//metabolic process;GO:0006508//proteolysis;GO:0043170//macromolecule metabolic process;GO:0044238//primary metabolic process;GO:0071704//organic substance metabolic process;GO:0019538//protein metabolic process
BnaA01g10520D	218.86	125.277	15.5133	8.16	220.94	89.3033	17.68	6.43	-0.926868	0.0112273	-1.45923	0.000159235	BnaA01g10520D [Brassica napus]	-	-	-	-	-	-	-
BnaA01g10530D	420.73	1925.96	10.1067	42.4433	283.71	1165.28	7.63333	28.6667	2.07023	5.09e-16	1.90899	1.14527e-11	BnaA01g10530D [Brassica napus]	Metabolism	Nucleotide metabolism;Global and Overview	ko01100//Metabolic pathways;ko00240//Pyrimidine metabolism	K01937	GO:0005623//cell;GO:0044424//intracellular part;GO:0044464//cell part;GO:0005622//intracellular	GO:0016879//ligase activity, forming carbon-nitrogen bonds;GO:0003824//catalytic activity;GO:0016874//ligase activity;GO:0003883//CTP synthase activity	GO:0006796//phosphate-containing compound metabolic process;GO:0034641//cellular nitrogen compound metabolic process;GO:0072527//pyrimidine-containing compound metabolic process;GO:0006221//pyrimidine nucleotide biosynthetic process;GO:0046483//heterocycle metabolic process;GO:0044249//cellular biosynthetic process;GO:0044699//single-organism process;GO:1901362//organic cyclic compound biosynthet…
BnaA01g10540D	7.74667	4.05	0.216667	0.106667	18.74	3.33333	0.59	0.0933333	-1.02237	0.340807	-2.66025	0.000699899	BnaA01g10540D [Brassica napus]	Genetic Information Processing	Replication and repair	ko03030//DNA replication	K10744	GO:0043227//membrane-bounded organelle;GO:0005623//cell;GO:0044424//intracellular part;GO:0043226//organelle;GO:0044464//cell part;GO:0005622//intracellular;GO:0005634//nucleus;GO:0043229//intracellular organelle;GO:0043231//intracellular membrane-bounded organelle	GO:0016491//oxidoreductase activity;GO:0003824//catalytic activity	GO:0008152//metabolic process;GO:0044699//single-organism process;GO:0044710//single-organism metabolic process;GO:0055114//oxidation-reduction process
BnaA01g10550D	699.423	265.717	35.8833	12.54	661.063	207.14	37.8633	10.8767	-1.51678	1.55e-09	-1.79956	1.03741e-10	BnaA01g10550D [Brassica napus]	-	-	-	-	-	GO:0016817//hydrolase activity, acting on acid anhydrides;GO:0036094//small molecule binding;GO:0003824//catalytic activity;GO:0016787//hydrolase activity;GO:0035639//purine ribonucleoside triphosphate binding;GO:0005525//GTP binding;GO:0032561//guanyl ribonucleotide binding;GO:0032553//ribonucleotide binding;GO:0097367//carbohydrate derivative binding;GO:0005488//binding;GO:1901363//heterocyclic…	-
BnaA01g10570D	16.3333	2.66667	1.30333	0.19	10.6667	2.66667	0.943333	0.21	-2.77813	7.36e-05	-2.16738	0.0108106	PREDICTED: vacuolar protein sorting-associated protein 2 homolog 2-like [Brassica napus]	Cellular Processes	Transport and catabolism	ko04144//Endocytosis	K12191	GO:0044444//cytoplasmic part;GO:0043226//organelle;GO:0016020//membrane;GO:0044424//intracellular part;GO:0044422//organelle part;GO:0044440//endosomal part;GO:0098805//whole membrane;GO:0012505//endomembrane system;GO:0010008//endosome membrane;GO:0044446//intracellular organelle part;GO:0043227//membrane-bounded organelle;GO:0005737//cytoplasm;GO:0031090//organelle membrane;GO:0043231//intracel…	GO:0005488//binding	GO:0006996//organelle organization;GO:0015031//protein transport;GO:0016571//histone methylation;GO:0061640//cytoskeleton-dependent cytokinesis;GO:1901360//organic cyclic compound metabolic process;GO:0019538//protein metabolic process;GO:0000278//mitotic cell cycle;GO:0051234//establishment of localization;GO:0016569//covalent chromatin modification;GO:0043933//macromolecular complex subunit org…
BnaA01g10580D	190.333	221.667	10.76	11.42	195.667	107	12.3367	6.16667	0.0858846	0.817308	-1.00039	0.00912546	PREDICTED: protein LSD1-like isoform X1 [Brassica napus]	-	-	-	-	-	-	-
BnaA01g10590D	392.983	184.38	6.28333	2.68667	386.297	252.527	6.87	4.13333	-1.22571	6.31e-07	-0.733004	0.00648171	BnaA01g10590D [Brassica napus]	-	-	-	-	GO:0043231//intracellular membrane-bounded organelle;GO:0043226//organelle;GO:0043229//intracellular organelle;GO:0043227//membrane-bounded organelle;GO:0044424//intracellular part;GO:0005623//cell;GO:0005634//nucleus;GO:0044464//cell part;GO:0005622//intracellular	GO:0005488//binding;GO:0005515//protein binding	-
BnaA01g10620D	11.4833	4.66667	0.24	0.0866667	10.0433	5	0.223333	0.106667	-1.46949	0.0448097	-1.06609	0.283369	BnaA01g10620D [Brassica napus]	-	-	-	-	-	GO:0017171//serine hydrolase activity;GO:0004175//endopeptidase activity;GO:0070011//peptidase activity, acting on L-amino acid peptides;GO:0005515//protein binding;GO:0008236//serine-type peptidase activity;GO:0042802//identical protein binding;GO:0005488//binding;GO:0004252//serine-type endopeptidase activity;GO:0016787//hydrolase activity;GO:0008233//peptidase activity;GO:0003824//catalytic ac…	GO:0071704//organic substance metabolic process;GO:0043086//negative regulation of catalytic activity;GO:0006508//proteolysis;GO:0048519//negative regulation of biological process;GO:0044092//negative regulation of molecular function;GO:0050789//regulation of biological process;GO:0009892//negative regulation of metabolic process;GO:0019222//regulation of metabolic process;GO:0065007//biological …
BnaA01g10630D	249.203	141.94	7.94333	4.12667	270.197	142.677	9.50333	4.57	-0.944768	0.000269778	-1.05624	0.000374299	PREDICTED: small nuclear ribonucleoprotein-associated proteins B and B'-like [Brassica napus]	Genetic Information Processing	Transcription	ko03040//Spliceosome	K11086	-	-	-
BnaA01g10660D	11.3333	37.3333	0.303333	0.883333	14	42.3333	0.406667	1.12	1.54205	0.00127131	1.46158	0.00210243	BnaA01g10660D [Brassica napus]	-	-	-	-	-	GO:0005488//binding;GO:0005515//protein binding	-
BnaA01g10690D	11.8167	20.6667	0.333333	0.543333	94.73	35.31	3.07	1.07333	0.704872	0.237549	-1.51614	0.00070592	PREDICTED: calcium-binding protein CML42 [Brassica rapa]	Organismal Systems	Environmental adaptation	ko04626//Plant-pathogen interaction	K13448	-	GO:0005488//binding;GO:0005509//calcium ion binding;GO:0046872//metal ion binding;GO:0043169//cation binding;GO:0043167//ion binding	GO:0071840//cellular component organization or biogenesis;GO:0048856//anatomical structure development;GO:0032502//developmental process;GO:0048468//cell development;GO:0044699//single-organism process;GO:0009987//cellular process;GO:0000902//cell morphogenesis;GO:0016043//cellular component organization;GO:0044763//single-organism cellular process;GO:0032989//cellular component morphogenesis;GO:…
BnaA01g10730D	11.7233	3.21333	0.46	0.116667	13.3933	4.60333	0.596667	0.186667	-1.97924	0.0105138	-1.67646	0.0213001	BnaA01g10730D [Brassica napus]	-	-	-	-	-	-	-
BnaA01g10740D	21.69	10.6667	0.723333	0.34	30.97	7	1.18	0.25	-1.08913	0.160485	-2.23879	0.00111804	PREDICTED: cannabidiolic acid synthase-like 1 [Brassica rapa]	-	-	-	-	GO:0043227//membrane-bounded organelle;GO:0043229//intracellular organelle;GO:0005623//cell;GO:0043226//organelle;GO:0044464//cell part;GO:0009536//plastid;GO:0044424//intracellular part;GO:0005737//cytoplasm;GO:0005622//intracellular;GO:0044444//cytoplasmic part;GO:0043231//intracellular membrane-bounded organelle	GO:0043167//ion binding;GO:0008762//UDP-N-acetylmuramate dehydrogenase activity;GO:0050660//flavin adenine dinucleotide binding;GO:0036094//small molecule binding;GO:0050662//coenzyme binding;GO:0000166//nucleotide binding;GO:0016614//oxidoreductase activity, acting on CH-OH group of donors;GO:0097159//organic cyclic compound binding;GO:0003824//catalytic activity;GO:0016616//oxidoreductase activ…	GO:0044699//single-organism process;GO:0008152//metabolic process;GO:0044710//single-organism metabolic process;GO:0055114//oxidation-reduction process
BnaA01g10750D	554.093	3670.22	18.2833	111.817	1721.62	1712.33	63.9433	59.7767	2.61253	2.43e-06	-0.0972115	0.840474	BnaA01g10750D [Brassica napus]	-	-	-	-	-	GO:0016614//oxidoreductase activity, acting on CH-OH group of donors;GO:0048037//cofactor binding;GO:0050662//coenzyme binding;GO:0000166//nucleotide binding;GO:0008762//UDP-N-acetylmuramate dehydrogenase activity;GO:0097159//organic cyclic compound binding;GO:0050660//flavin adenine dinucleotide binding;GO:0016616//oxidoreductase activity, acting on the CH-OH group of donors, NAD or NADP as acce…	GO:0044699//single-organism process;GO:0055114//oxidation-reduction process;GO:0008152//metabolic process;GO:0044710//single-organism metabolic process
BnaA01g10770D	0.223333	2.67333	0.0166667	0.166667	2.85333	0	0.226667	0.001	3.32193	0.197329	-7.82443	0.0336127	BnaA01g10770D [Brassica napus]	-	-	-	-	-	GO:1901363//heterocyclic compound binding;GO:0048037//cofactor binding;GO:0043168//anion binding;GO:0003824//catalytic activity;GO:0016491//oxidoreductase activity;GO:0050660//flavin adenine dinucleotide binding;GO:1901265//nucleoside phosphate binding;GO:0050662//coenzyme binding;GO:0000166//nucleotide binding;GO:0097159//organic cyclic compound binding;GO:0043167//ion binding;GO:0005488//bindin…	GO:0055114//oxidation-reduction process;GO:0008152//metabolic process;GO:0044710//single-organism metabolic process;GO:0044699//single-organism process
BnaA01g10780D	219.643	158.483	7.17667	4.74333	286.373	122.727	10.31	4.07667	-0.597413	0.0333976	-1.33858	6.11909e-06	PREDICTED: dihydroceramide fatty acyl 2-hydroxylase FAH2 [Brassica rapa]	-	-	-	-	GO:0044424//intracellular part;GO:0005623//cell;GO:0044464//cell part;GO:0043231//intracellular membrane-bounded organelle;GO:0043226//organelle;GO:0043227//membrane-bounded organelle;GO:0043229//intracellular organelle;GO:0005622//intracellular	GO:0046872//metal ion binding;GO:0046914//transition metal ion binding;GO:0043167//ion binding;GO:0005488//binding;GO:0005506//iron ion binding;GO:0016491//oxidoreductase activity;GO:0043169//cation binding;GO:0003824//catalytic activity	GO:0046394//carboxylic acid biosynthetic process;GO:0044763//single-organism cellular process;GO:0044699//single-organism process;GO:0044710//single-organism metabolic process;GO:0055114//oxidation-reduction process;GO:0016265//death;GO:1901576//organic substance biosynthetic process;GO:0044238//primary metabolic process;GO:0012501//programmed cell death;GO:0006633//fatty acid biosynthetic proces…
BnaA01g10790D	113.157	305.137	5.34	13.2067	118.137	265.757	6.18667	12.9533	1.30635	2.21e-07	1.06609	0.000340364	ERT2 [Arabidopsis thaliana]	-	-	-	-	-	-	-
BnaA01g10810D	56.2367	20.0133	1.07333	0.346667	57.2767	14.3333	1.19667	0.273333	-1.63048	3.16e-05	-2.13029	1.5294e-05	BnaA01g10810D [Brassica napus]	-	-	-	-	GO:0043227//membrane-bounded organelle;GO:0044464//cell part;GO:0044424//intracellular part;GO:0005622//intracellular;GO:0043231//intracellular membrane-bounded organelle;GO:0043226//organelle;GO:0005623//cell;GO:0043229//intracellular organelle	GO:0016740//transferase activity;GO:0003723//RNA binding;GO:0097159//organic cyclic compound binding;GO:0016741//transferase activity, transferring one-carbon groups;GO:0003725//double-stranded RNA binding;GO:0005488//binding;GO:0003824//catalytic activity;GO:0008171//O-methyltransferase activity;GO:1901363//heterocyclic compound binding;GO:0008173//RNA methyltransferase activity;GO:0003676//nucl…	GO:0070887//cellular response to chemical stimulus;GO:0048523//negative regulation of cellular process;GO:0006304//DNA modification;GO:0048447//sepal morphogenesis;GO:0032259//methylation;GO:0034249//negative regulation of cellular amide metabolic process;GO:0009892//negative regulation of metabolic process;GO:0009653//anatomical structure morphogenesis;GO:0090567//reproductive shoot system devel…
BnaA01g10820D	0.333333	147.043	0.01	3.77333	0	37.2033	0.001	1.10333	8.5597	7.98e-37	10.1077	3.29705e-13	BnaA01g10820D [Brassica napus]	-	-	-	-	-	GO:0008171//O-methyltransferase activity;GO:0008168//methyltransferase activity;GO:0016741//transferase activity, transferring one-carbon groups;GO:0003725//double-stranded RNA binding;GO:0005488//binding;GO:0016740//transferase activity;GO:0097159//organic cyclic compound binding;GO:0003824//catalytic activity;GO:0003676//nucleic acid binding;GO:1901363//heterocyclic compound binding;GO:0008173/…	GO:0032259//methylation;GO:0006457//protein folding;GO:0008152//metabolic process;GO:0071704//organic substance metabolic process;GO:0044260//cellular macromolecule metabolic process;GO:0044238//primary metabolic process;GO:0009451//RNA modification;GO:0006807//nitrogen compound metabolic process;GO:0043170//macromolecule metabolic process;GO:0009987//cellular process;GO:0046483//heterocycle meta…
BnaA01g10840D	78.3333	9	1.34	0.14	65.4867	20.3333	1.24667	0.343333	-3.25873	4.91e-14	-1.86039	0.00011156	BnaA01g10840D [Brassica napus]	-	-	-	-	-	GO:0003824//catalytic activity;GO:0004672//protein kinase activity;GO:0043168//anion binding;GO:0032555//purine ribonucleotide binding;GO:0097367//carbohydrate derivative binding;GO:0036094//small molecule binding;GO:1901265//nucleoside phosphate binding;GO:0016773//phosphotransferase activity, alcohol group as acceptor;GO:0016740//transferase activity;GO:0032549//ribonucleoside binding;GO:000471…	GO:0043170//macromolecule metabolic process;GO:0043412//macromolecule modification;GO:0019538//protein metabolic process;GO:0016310//phosphorylation;GO:0009987//cellular process;GO:0006793//phosphorus metabolic process;GO:0044267//cellular protein metabolic process;GO:0036211//protein modification process;GO:0006468//protein phosphorylation;GO:0044260//cellular macromolecule metabolic process;GO:…
BnaA01g10880D	0	15.3333	0.001	0.726667	0.333333	50.3333	0.02	2.77	9.50515	4.36e-06	7.11374	1.8674e-16	PREDICTED: late embryogenesis abundant protein 1-like [Brassica napus]	-	-	-	-	-	-	GO:0003006//developmental process involved in reproduction;GO:0032502//developmental process;GO:0022414//reproductive process;GO:0000003//reproduction
BnaA01g10940D	2.36667	11.03	0.44	2.00333	7	16.7533	1.54	3.61333	2.18683	0.0309338	1.2304	0.274291	BnaA01g10940D [Brassica napus]	-	-	-	-	-	-	GO:0050896//response to stimulus;GO:0009725//response to hormone;GO:0010033//response to organic substance;GO:0009719//response to endogenous stimulus;GO:0042221//response to chemical
BnaA01g10960D	39.03	17.1333	0.99	0.403333	51.9933	19.7633	1.49333	0.51	-1.29546	0.00182734	-1.54997	0.000738009	BnaA01g10960D [Brassica napus]	-	-	-	-	GO:0016020//membrane	GO:0016740//transferase activity;GO:0016757//transferase activity, transferring glycosyl groups;GO:0008378//galactosyltransferase activity;GO:0005488//binding;GO:0016758//transferase activity, transferring hexosyl groups;GO:0003824//catalytic activity;GO:0030246//carbohydrate binding	GO:0036211//protein modification process;GO:0043413//macromolecule glycosylation;GO:0044238//primary metabolic process;GO:0044710//single-organism metabolic process;GO:0009058//biosynthetic process;GO:0044237//cellular metabolic process;GO:0043170//macromolecule metabolic process;GO:0034645//cellular macromolecule biosynthetic process;GO:0009100//glycoprotein metabolic process;GO:0006486//protein…
BnaA01g10970D	22.6667	9.66667	0.726667	0.28	19.9733	6.33333	0.71	0.213333	-1.37587	0.00589746	-1.73471	0.00296442	BnaA01g10970D [Brassica napus]	-	-	-	-	GO:0043231//intracellular membrane-bounded organelle;GO:0043226//organelle;GO:0044424//intracellular part;GO:0005623//cell;GO:0005622//intracellular;GO:0043229//intracellular organelle;GO:0043227//membrane-bounded organelle;GO:0044464//cell part	GO:0005488//binding;GO:0005515//protein binding	-
BnaA01g11000D	42.3333	23	4.73333	2.32667	45.0333	15.6667	5.62	1.75333	-1.02459	0.0157321	-1.68047	0.000457571	cytochrome-c oxidase/ electron carrier [Arabidopsis thaliana]	-	-	-	-	GO:0044464//cell part;GO:0044437//vacuolar part;GO:0044422//organelle part;GO:0031967//organelle envelope;GO:0043231//intracellular membrane-bounded organelle;GO:0044446//intracellular organelle part;GO:0019866//organelle inner membrane;GO:0005623//cell;GO:0016020//membrane;GO:0005737//cytoplasm;GO:0043226//organelle;GO:0005739//mitochondrion;GO:0043227//membrane-bounded organelle;GO:0005740//mit…	GO:0022891//substrate-specific transmembrane transporter activity;GO:0016676//oxidoreductase activity, acting on a heme group of donors, oxygen as acceptor;GO:0004129//cytochrome-c oxidase activity;GO:0009055//electron carrier activity;GO:0015078//hydrogen ion transmembrane transporter activity;GO:0022890//inorganic cation transmembrane transporter activity;GO:0015002//heme-copper terminal oxidas…	GO:0034613//cellular protein localization;GO:0051179//localization;GO:0006605//protein targeting;GO:0051649//establishment of localization in cell;GO:0015031//protein transport;GO:1902582//single-organism intracellular transport;GO:0071702//organic substance transport;GO:0008104//protein localization;GO:0006810//transport;GO:0006886//intracellular protein transport;GO:0044765//single-organism tra…
BnaA01g11010D	1.67667	0.333333	0.0633333	0.01	11.43	0.333333	0.47	0.0133333	-2.66297	0.437331	-5.13955	0.000312936	BnaA01g11010D [Brassica napus]	-	-	-	-	-	GO:1901265//nucleoside phosphate binding;GO:0050660//flavin adenine dinucleotide binding;GO:0008762//UDP-N-acetylmuramate dehydrogenase activity;GO:0043168//anion binding;GO:0048037//cofactor binding;GO:0016491//oxidoreductase activity;GO:0003824//catalytic activity;GO:0005488//binding;GO:1901363//heterocyclic compound binding;GO:0036094//small molecule binding;GO:0050662//coenzyme binding;GO:004…	GO:0008152//metabolic process;GO:0055114//oxidation-reduction process;GO:0044710//single-organism metabolic process;GO:0044699//single-organism process
BnaA01g11030D	7	3.04667	0.546667	0.22	50	11	4.38333	0.853333	-1.31316	0.145101	-2.36085	3.45851e-06	BnaA01g11030D [Brassica napus]	-	-	-	-	-	-	-
BnaA01g11040D	5.13333	5.33333	0.393333	0.38	25.3333	7.33333	2.17333	0.573333	-0.049753	1	-1.92246	0.00392985	BnaA01g11040D [Brassica napus]	-	-	-	-	GO:0005622//intracellular;GO:0044424//intracellular part;GO:0005623//cell;GO:0044464//cell part	GO:0043169//cation binding;GO:0003824//catalytic activity;GO:0005488//binding;GO:0043167//ion binding;GO:0046872//metal ion binding	GO:0016485//protein processing;GO:0071704//organic substance metabolic process;GO:0051604//protein maturation;GO:0008152//metabolic process;GO:0006508//proteolysis;GO:0043170//macromolecule metabolic process;GO:0010467//gene expression;GO:0019538//protein metabolic process;GO:0044238//primary metabolic process
BnaA01g11060D	301.23	232.597	7.29667	5.11333	364.74	188.193	9.76	4.64333	-0.512973	0.0392824	-1.07172	6.33278e-05	BnaA01g11060D [Brassica napus]	Genetic Information Processing;Metabolism	Glycan biosynthesis and metabolism;Global and Overview;Folding, sorting and degradation	ko01100//Metabolic pathways;ko04141//Protein processing in endoplasmic reticulum;ko00510//N-Glycan biosynthesis	K12667	GO:0005622//intracellular;GO:0043229//intracellular organelle;GO:0044446//intracellular organelle part;GO:0042175//nuclear outer membrane-endoplasmic reticulum membrane network;GO:0044444//cytoplasmic part;GO:0005737//cytoplasm;GO:0043227//membrane-bounded organelle;GO:0005783//endoplasmic reticulum;GO:0012505//endomembrane system;GO:0008250//oligosaccharyltransferase complex;GO:0044432//endoplas…	GO:0004576//oligosaccharyl transferase activity;GO:0003824//catalytic activity;GO:0016757//transferase activity, transferring glycosyl groups;GO:0016740//transferase activity;GO:0016758//transferase activity, transferring hexosyl groups;GO:0004579//dolichyl-diphosphooligosaccharide-protein glycotransferase activity	GO:1901137//carbohydrate derivative biosynthetic process;GO:0044237//cellular metabolic process;GO:0034645//cellular macromolecule biosynthetic process;GO:0044723//single-organism carbohydrate metabolic process;GO:0018279//protein N-linked glycosylation via asparagine;GO:0005975//carbohydrate metabolic process;GO:0036211//protein modification process;GO:0071704//organic substance metabolic proces…
BnaA01g11080D	11	1.33333	0.383333	0.0433333	16.6667	1.66667	0.643333	0.06	-3.14505	0.00108889	-3.42253	5.61612e-05	BnaA01g11080D [Brassica napus]	-	-	-	-	-	GO:0005488//binding;GO:0005515//protein binding	-
BnaA01g11090D	268.163	79.92	7.24333	1.99333	283.403	65.0833	8.58667	1.77333	-1.86147	9.12e-14	-2.27563	3.43396e-13	PREDICTED: dnaJ protein ERDJ2B [Brassica napus]	Genetic Information Processing	Folding, sorting and degradation	ko04141//Protein processing in endoplasmic reticulum;ko03060//Protein export	K09540	GO:0005737//cytoplasm;GO:0044424//intracellular part;GO:0044422//organelle part;GO:0031090//organelle membrane;GO:0044444//cytoplasmic part;GO:0005789//endoplasmic reticulum membrane;GO:0005783//endoplasmic reticulum;GO:0031300//intrinsic component of organelle membrane;GO:0016020//membrane;GO:0044425//membrane part;GO:0031227//intrinsic component of endoplasmic reticulum membrane;GO:0043226//org…	GO:0005215//transporter activity;GO:0022892//substrate-specific transporter activity;GO:0008565//protein transporter activity	-
BnaA01g11100D	153	84.8433	7.8	3.93333	151	69.71	8.49333	3.66333	-0.987722	0.000292239	-1.21317	0.000269125	PREDICTED: pentatricopeptide repeat-containing protein At4g21190-like [Brassica napus]	-	-	-	-	GO:0044424//intracellular part;GO:0043226//organelle;GO:0005623//cell;GO:0044464//cell part;GO:0043227//membrane-bounded organelle;GO:0043231//intracellular membrane-bounded organelle;GO:0043229//intracellular organelle;GO:0005622//intracellular	-	GO:0022414//reproductive process;GO:0032502//developmental process;GO:0003006//developmental process involved in reproduction;GO:0000003//reproduction
BnaA01g11140D	270.697	1577.2	11.81	62.2	92.5033	960.063	4.46667	42.7	2.39691	8.08e-23	3.25697	4.07425e-25	transmembrane protein [Arabidopsis thaliana]	-	-	-	-	-	-	-
BnaA01g11190D	2454.59	683.027	145.247	37.1767	2422.65	532.85	158.47	32.35	-1.96604	3.5e-15	-2.29237	2.01717e-13	oxygen-evolving enhancer protein 3-1, chloroplastic [Brassica rapa]	Metabolism	Global and Overview;Energy metabolism	ko01100//Metabolic pathways;ko00195//Photosynthesis	K08901	GO:0044424//intracellular part;GO:1902494//catalytic complex;GO:0009507//chloroplast;GO:0043227//membrane-bounded organelle;GO:0043226//organelle;GO:0009654//photosystem II oxygen evolving complex;GO:0043231//intracellular membrane-bounded organelle;GO:0042651//thylakoid membrane;GO:0044434//chloroplast part;GO:0009523//photosystem II;GO:0044444//cytoplasmic part;GO:0043229//intracellular organel…	GO:0043169//cation binding;GO:0005509//calcium ion binding;GO:0043167//ion binding;GO:0005488//binding;GO:0046872//metal ion binding	GO:0019725//cellular homeostasis;GO:0043412//macromolecule modification;GO:0065008//regulation of biological quality;GO:0016043//cellular component organization;GO:0006811//ion transport;GO:0043094//cellular metabolic compound salvage;GO:0044763//single-organism cellular process;GO:0044267//cellular protein metabolic process;GO:0043170//macromolecule metabolic process;GO:0044699//single-organism …
BnaA01g11200D	12.6667	2	0.426667	0.0633333	11	2	0.413333	0.07	-2.75207	0.000743193	-2.56188	0.00346497	BnaA01g11200D [Brassica napus]	-	-	-	-	-	GO:0005515//protein binding;GO:0005488//binding	-
BnaA01g11220D	30.9633	156.967	0.663333	3.01667	36.61	115.85	0.863333	2.53667	2.18515	5.44e-13	1.55494	2.47291e-05	PREDICTED: receptor-like serine/threonine-protein kinase SD1-8 [Brassica rapa]	-	-	-	-	-	GO:0032553//ribonucleotide binding;GO:0016773//phosphotransferase activity, alcohol group as acceptor;GO:1901363//heterocyclic compound binding;GO:0032550//purine ribonucleoside binding;GO:0003824//catalytic activity;GO:0043167//ion binding;GO:0001882//nucleoside binding;GO:0004672//protein kinase activity;GO:0097159//organic cyclic compound binding;GO:0097367//carbohydrate derivative binding;GO:…	GO:0044267//cellular protein metabolic process;GO:0044238//primary metabolic process;GO:0048544//recognition of pollen;GO:0006468//protein phosphorylation;GO:0071704//organic substance metabolic process;GO:0022414//reproductive process;GO:0006796//phosphate-containing compound metabolic process;GO:0000003//reproduction;GO:0044763//single-organism cellular process;GO:0044260//cellular macromolecul…
BnaA01g11230D	112.527	7.33333	3.03333	0.186667	664.73	39.4	20.36	1.07667	-4.02237	6.56e-10	-4.24109	7.02157e-13	BnaA01g11230D [Brassica napus]	-	-	-	-	GO:0016020//membrane	GO:0005524//ATP binding;GO:0016772//transferase activity, transferring phosphorus-containing groups;GO:0032550//purine ribonucleoside binding;GO:0000166//nucleotide binding;GO:0030554//adenyl nucleotide binding;GO:0097159//organic cyclic compound binding;GO:0001883//purine nucleoside binding;GO:0097367//carbohydrate derivative binding;GO:0032555//purine ribonucleotide binding;GO:0043168//anion bi…	GO:0000003//reproduction;GO:0044763//single-organism cellular process;GO:0009856//pollination;GO:0044267//cellular protein metabolic process;GO:0008037//cell recognition;GO:0009605//response to external stimulus;GO:0042221//response to chemical;GO:0048544//recognition of pollen;GO:0009875//pollen-pistil interaction;GO:0071702//organic substance transport;GO:0006793//phosphorus metabolic process;G…
BnaA01g11250D	3.66667	3.33333	0.103333	0.09	9.66667	2	0.32	0.0666667	-0.199309	1	-2.26303	0.0196075	BnaA01g11250D [Brassica napus]	-	-	-	-	-	GO:0030554//adenyl nucleotide binding;GO:0005524//ATP binding;GO:0032550//purine ribonucleoside binding;GO:0001883//purine nucleoside binding;GO:0004672//protein kinase activity;GO:1901363//heterocyclic compound binding;GO:0005488//binding;GO:0035639//purine ribonucleoside triphosphate binding;GO:0016301//kinase activity;GO:0032559//adenyl ribonucleotide binding;GO:0017076//purine nucleotide bind…	GO:0044267//cellular protein metabolic process;GO:0044237//cellular metabolic process;GO:0009987//cellular process;GO:0006796//phosphate-containing compound metabolic process;GO:0044260//cellular macromolecule metabolic process;GO:0016310//phosphorylation;GO:0036211//protein modification process;GO:0008152//metabolic process;GO:0071704//organic substance metabolic process;GO:0043170//macromolecul…
BnaA01g11280D	59.3533	322.123	3.14667	15.6367	98.5033	219.683	5.86667	12.1533	2.31304	3.05e-15	1.05074	0.00190734	PREDICTED: myb-related protein 308 [Brassica napus]	-	-	-	-	GO:0044424//intracellular part;GO:0043229//intracellular organelle;GO:0005622//intracellular;GO:0043227//membrane-bounded organelle;GO:0005623//cell;GO:0043231//intracellular membrane-bounded organelle;GO:0044464//cell part;GO:0043226//organelle	GO:0001071//nucleic acid binding transcription factor activity;GO:0097159//organic cyclic compound binding;GO:0003677//DNA binding;GO:0005488//binding;GO:0044877//macromolecular complex binding;GO:0003676//nucleic acid binding;GO:1901363//heterocyclic compound binding;GO:0003682//chromatin binding	GO:0018130//heterocycle biosynthetic process;GO:0009987//cellular process;GO:1902578//single-organism localization;GO:0008152//metabolic process;GO:0071310//cellular response to organic substance;GO:0034645//cellular macromolecule biosynthetic process;GO:0006351//transcription, DNA-templated;GO:0071495//cellular response to endogenous stimulus;GO:0006811//ion transport;GO:0023052//signaling;GO:00…
BnaA01g11290D	37.6667	2.33333	3.14333	0.186667	37.3333	5	3.52	0.453333	-4.07376	1.13e-08	-2.95693	1.04211e-06	At4g21445p-like protein [Arabidopsis lyrata]	-	-	-	-	GO:0044435//plastid part;GO:0005623//cell;GO:0043226//organelle;GO:0044444//cytoplasmic part;GO:0009532//plastid stroma;GO:0044446//intracellular organelle part;GO:0043231//intracellular membrane-bounded organelle;GO:0043227//membrane-bounded organelle;GO:0009536//plastid;GO:0044464//cell part;GO:0005622//intracellular;GO:0005737//cytoplasm;GO:0043229//intracellular organelle;GO:0044424//intracel…	-	-
BnaA01g11310D	884.233	340.273	40.5	14.27	830.813	352.127	42.6267	16.4367	-1.50494	1.67e-11	-1.37484	1.93406e-07	PREDICTED: vesicle-associated protein 4-2 [Brassica napus]	-	-	-	-	GO:0043227//membrane-bounded organelle;GO:0005622//intracellular;GO:0044464//cell part;GO:0043226//organelle;GO:0043229//intracellular organelle;GO:0043231//intracellular membrane-bounded organelle;GO:0044424//intracellular part;GO:0005623//cell;GO:0016020//membrane	GO:0005198//structural molecule activity	GO:0051179//localization;GO:0009987//cellular process;GO:0051649//establishment of localization in cell;GO:0008104//protein localization;GO:0043412//macromolecule modification;GO:0006886//intracellular protein transport;GO:0044699//single-organism process;GO:0006497//protein lipidation;GO:1902582//single-organism intracellular transport;GO:0015031//protein transport;GO:0070727//cellular macromole…
BnaA01g11320D	229.297	119.963	9.07333	4.41333	223.51	119.03	9.80667	4.78333	-1.03976	0.000274759	-1.03575	0.000339405	PREDICTED: bifunctional riboflavin kinase/FMN phosphatase [Brassica napus]	Metabolism	Global and Overview;Metabolism of cofactors and vitamins	ko01100//Metabolic pathways;ko01110//Biosynthesis of secondary metabolites;ko00740//Riboflavin metabolism	K00861	-	GO:0016773//phosphotransferase activity, alcohol group as acceptor;GO:0003824//catalytic activity;GO:0016301//kinase activity;GO:0016787//hydrolase activity;GO:0008531//riboflavin kinase activity;GO:0016772//transferase activity, transferring phosphorus-containing groups;GO:0016740//transferase activity	GO:0009231//riboflavin biosynthetic process;GO:1901360//organic cyclic compound metabolic process;GO:0042364//water-soluble vitamin biosynthetic process;GO:0018130//heterocycle biosynthetic process;GO:0044237//cellular metabolic process;GO:0034641//cellular nitrogen compound metabolic process;GO:1901362//organic cyclic compound biosynthetic process;GO:0008152//metabolic process;GO:0042726//flavin…
BnaA01g11340D	1.33333	6.33333	0.126667	0.54	3.33333	4	0.336667	0.36	2.09192	0.0411611	0.096676	1	BnaA01g11340D [Brassica napus]	-	-	-	-	GO:0005622//intracellular;GO:0043231//intracellular membrane-bounded organelle;GO:0005737//cytoplasm;GO:0009536//plastid;GO:0044424//intracellular part;GO:0043229//intracellular organelle;GO:0005623//cell;GO:0044444//cytoplasmic part;GO:0043227//membrane-bounded organelle;GO:0043226//organelle;GO:0044464//cell part	-	-
BnaA01g11350D	61.8433	5	3.53667	0.26	87.0133	5.66667	5.55333	0.34	-3.76581	5.38e-14	-4.02975	1.79118e-16	BnaA01g11350D [Brassica napus]	-	-	-	-	-	GO:0005515//protein binding;GO:0005488//binding	-
BnaA01g11360D	48.5367	21.2767	2.02333	0.816667	40.9033	15.3333	1.89333	0.66	-1.30891	0.000794192	-1.52039	0.00121048	BnaA01g11360D [Brassica napus]	-	-	-	-	-	GO:0005488//binding;GO:0005515//protein binding	-
BnaA01g11370D	13.0867	6.66667	0.313333	0.153333	28.7667	9.15	0.786667	0.223333	-1.03103	0.174888	-1.81655	0.00112111	BnaA01g11370D [Brassica napus]	Genetic Information Processing	Folding, sorting and degradation	ko04120//Ubiquitin mediated proteolysis	K03351	GO:0044422//organelle part;GO:0043227//membrane-bounded organelle;GO:0031461//cullin-RING ubiquitin ligase complex;GO:0044464//cell part;GO:0005634//nucleus;GO:0005680//anaphase-promoting complex;GO:1990234//transferase complex;GO:1902494//catalytic complex;GO:0000151//ubiquitin ligase complex;GO:0005622//intracellular;GO:0043234//protein complex;GO:0043231//intracellular membrane-bounded organel…	GO:0005515//protein binding;GO:0005488//binding	GO:0043161//proteasome-mediated ubiquitin-dependent protein catabolic process;GO:0044248//cellular catabolic process;GO:0007346//regulation of mitotic cell cycle;GO:0033047//regulation of mitotic sister chromatid segregation;GO:0050794//regulation of cellular process;GO:0007088//regulation of mitotic nuclear division;GO:0051983//regulation of chromosome segregation;GO:0044265//cellular macromolec…
BnaA01g11380D	30.1033	3.03667	0.8	0.0733333	35.2333	3.98	1.03	0.103333	-3.44746	2.32e-07	-3.31727	8.85323e-07	PREDICTED: B3 domain-containing transcription factor VAL3 isoform X2 [Brassica napus]	-	-	-	-	-	GO:0003676//nucleic acid binding;GO:0003677//DNA binding;GO:0005488//binding;GO:0097159//organic cyclic compound binding;GO:1901363//heterocyclic compound binding	-
BnaA01g11390D	277	1019.33	11.3833	38.34	292.333	596.72	13.44	25.72	1.75193	9.3e-12	0.936358	0.00109389	PREDICTED: vacuolar protein sorting-associated protein 28 homolog 1 [Brassica rapa]	Cellular Processes	Transport and catabolism	ko04144//Endocytosis	K12184	GO:0005623//cell;GO:0043227//membrane-bounded organelle;GO:0044446//intracellular organelle part;GO:0043229//intracellular organelle;GO:0043231//intracellular membrane-bounded organelle;GO:0012505//endomembrane system;GO:0044422//organelle part;GO:0044424//intracellular part;GO:0044444//cytoplasmic part;GO:0005622//intracellular;GO:0044440//endosomal part;GO:0098805//whole membrane;GO:0005737//cy…	GO:0005488//binding	GO:0051234//establishment of localization;GO:0051179//localization
BnaA01g11400D	367.647	1260.74	13.0533	40.8467	629.057	1106.69	25.15	40.43	1.6458	5.78e-11	0.684868	0.0194929	BnaA01g11400D [Brassica napus]	-	-	-	-	GO:0043226//organelle;GO:0044464//cell part;GO:0044424//intracellular part;GO:0043231//intracellular membrane-bounded organelle;GO:0043229//intracellular organelle;GO:0005622//intracellular;GO:0043227//membrane-bounded organelle;GO:0005623//cell;GO:0009536//plastid;GO:0044444//cytoplasmic part;GO:0005737//cytoplasm	-	-
BnaA01g11410D	2.66667	13.6667	0.13	0.593333	0.666667	4	0.0333333	0.19	2.19033	0.00396066	2.51096	0.183174	BnaA01g11410D [Brassica napus]	-	-	-	-	-	GO:0005488//binding;GO:0005515//protein binding	-
BnaA01g11440D	15	5.66667	1.90333	0.673333	33.6667	23	4.90667	3.25333	-1.49914	0.0328689	-0.592825	0.383917	BnaA01g11440D [Brassica napus]	-	-	-	-	GO:0005623//cell;GO:0043226//organelle;GO:0043229//intracellular organelle;GO:0044464//cell part;GO:0005622//intracellular;GO:0044444//cytoplasmic part;GO:0005737//cytoplasm;GO:0043227//membrane-bounded organelle;GO:0043231//intracellular membrane-bounded organelle;GO:0044424//intracellular part	GO:0046872//metal ion binding;GO:0043169//cation binding;GO:0008270//zinc ion binding;GO:0043167//ion binding;GO:0005488//binding;GO:0046914//transition metal ion binding;GO:0016491//oxidoreductase activity;GO:0003824//catalytic activity	GO:0044699//single-organism process;GO:0051707//response to other organism;GO:0050896//response to stimulus;GO:0008152//metabolic process;GO:0009607//response to biotic stimulus;GO:0055114//oxidation-reduction process;GO:0043207//response to external biotic stimulus;GO:0051704//multi-organism process;GO:0044710//single-organism metabolic process;GO:0009608//response to symbiont;GO:0009605//respon…
BnaA01g11450D	11.6667	0.333333	0.666667	0.0166667	15.6667	1.33333	0.983333	0.08	-5.32193	4.89e-06	-3.61961	2.32386e-05	PREDICTED: endonuclease 4 [Brassica napus]	-	-	-	-	-	GO:0003676//nucleic acid binding;GO:0004520//endodeoxyribonuclease activity;GO:0016787//hydrolase activity;GO:0004518//nuclease activity;GO:0005488//binding;GO:0004519//endonuclease activity;GO:1901363//heterocyclic compound binding;GO:0097159//organic cyclic compound binding;GO:0004536//deoxyribonuclease activity;GO:0016788//hydrolase activity, acting on ester bonds;GO:0003824//catalytic activity	GO:0046700//heterocycle catabolic process;GO:0090304//nucleic acid metabolic process;GO:0019439//aromatic compound catabolic process;GO:0044265//cellular macromolecule catabolic process;GO:0006807//nitrogen compound metabolic process;GO:0009057//macromolecule catabolic process;GO:0044238//primary metabolic process;GO:0006139//nucleobase-containing compound metabolic process;GO:0006308//DNA catabo…
BnaA01g11540D	16.94	3.44333	1.30667	0.243333	15.3433	6	1.31333	0.473333	-2.42489	0.000543821	-1.4723	0.0409819	defensin-like protein [Arabidopsis thaliana]	-	-	-	-	-	-	-
BnaA01g11580D	102.65	10.9067	2.63667	0.256667	102.173	17.5867	2.88333	0.44	-3.36075	1.74e-15	-2.71216	1.0694e-08	PREDICTED: homeobox-leucine zipper protein MERISTEM L1 isoform X2 [Brassica napus]	-	-	-	-	GO:0043231//intracellular membrane-bounded organelle;GO:0005623//cell;GO:0043226//organelle;GO:0005634//nucleus;GO:0044464//cell part;GO:0043227//membrane-bounded organelle;GO:0043229//intracellular organelle;GO:0005622//intracellular;GO:0044424//intracellular part	GO:0003677//DNA binding;GO:0001071//nucleic acid binding transcription factor activity;GO:0043565//sequence-specific DNA binding;GO:0097159//organic cyclic compound binding;GO:0003676//nucleic acid binding;GO:0003700//transcription factor activity, sequence-specific DNA binding;GO:0005488//binding;GO:1901363//heterocyclic compound binding	-
BnaA01g11600D	99	63.01	3.37333	1.98667	100.12	47.8	3.8	1.66	-0.763825	0.0144931	-1.19482	0.000574561	BnaA01g11600D [Brassica napus]	-	-	-	-	-	GO:0016853//isomerase activity;GO:0016866//intramolecular transferase activity;GO:1901363//heterocyclic compound binding;GO:0009982//pseudouridine synthase activity;GO:0003676//nucleic acid binding;GO:0097159//organic cyclic compound binding;GO:0005488//binding;GO:0003824//catalytic activity;GO:0003723//RNA binding	GO:1901360//organic cyclic compound metabolic process;GO:0043170//macromolecule metabolic process;GO:0046483//heterocycle metabolic process;GO:0044238//primary metabolic process;GO:0016070//RNA metabolic process;GO:0044260//cellular macromolecule metabolic process;GO:0006725//cellular aromatic compound metabolic process;GO:0034641//cellular nitrogen compound metabolic process;GO:0071704//organic …
BnaA01g11640D	254.763	80.2633	16.1633	4.61333	216.333	89	15.24	5.68667	-1.80884	2.03e-12	-1.42221	3.56405e-06	PREDICTED: derlin-2.1 [Brassica napus]	Genetic Information Processing	Folding, sorting and degradation	ko04141//Protein processing in endoplasmic reticulum	K13989	-	-	-
BnaA01g11670D	94.3333	32.3333	5.83333	1.86	38.3333	13.3333	2.69	0.853333	-1.64902	0.000122973	-1.65642	0.000558339	BnaA01g11670D [Brassica napus]	Genetic Information Processing	Folding, sorting and degradation	ko04141//Protein processing in endoplasmic reticulum	K13993	-	-	GO:1901700//response to oxygen-containing compound;GO:0050896//response to stimulus;GO:0006950//response to stress;GO:0009628//response to abiotic stimulus;GO:0006979//response to oxidative stress;GO:0000302//response to reactive oxygen species;GO:0009314//response to radiation;GO:0009416//response to light stimulus;GO:0042221//response to chemical;GO:0009642//response to light intensity
BnaA01g11700D	12.3333	4	0.856667	0.24	22.6667	5	1.67333	0.333333	-1.8357	0.1328	-2.32769	0.027858	BnaA01g11700D [Brassica napus]	-	-	-	-	-	GO:0003677//DNA binding;GO:1901363//heterocyclic compound binding;GO:0097159//organic cyclic compound binding;GO:0005488//binding;GO:0003676//nucleic acid binding	-
BnaA01g11760D	136.333	384	4.90333	12.4	92.3333	1535.67	3.69667	54.9333	1.33851	0.000428188	3.89338	5.96672e-09	BnaA01g11760D [Brassica napus]	-	-	-	-	GO:0016020//membrane	GO:0022857//transmembrane transporter activity;GO:0022804//active transmembrane transporter activity;GO:0005215//transporter activity;GO:0015291//secondary active transmembrane transporter activity;GO:0015297//antiporter activity;GO:0090484//drug transporter activity;GO:0015238//drug transmembrane transporter activity	GO:0055085//transmembrane transport;GO:0044763//single-organism cellular process;GO:0051234//establishment of localization;GO:0050896//response to stimulus;GO:0009987//cellular process;GO:0044699//single-organism process;GO:0051179//localization;GO:0006855//drug transmembrane transport;GO:1902578//single-organism localization;GO:0006810//transport;GO:0015893//drug transport;GO:0042493//response t…
BnaA01g11770D	22.3333	60.3333	2.40667	5.94333	19.6667	49.3333	2.36667	5.61667	1.30424	0.00141023	1.24686	0.00698183	senescence regulator [Medicago truncatula]	-	-	-	-	-	-	-
BnaA01g11790D	110.913	598.98	3.15	15.62	92.22	452.233	2.90333	13.26	2.30997	5.4e-21	2.1913	4.27396e-14	BnaA01g11790D [Brassica napus]	Organismal Systems	Environmental adaptation	ko04626//Plant-pathogen interaction	K13412	GO:0016020//membrane	GO:0016301//kinase activity;GO:0043167//ion binding;GO:0035639//purine ribonucleoside triphosphate binding;GO:0046872//metal ion binding;GO:0016772//transferase activity, transferring phosphorus-containing groups;GO:0097159//organic cyclic compound binding;GO:0001882//nucleoside binding;GO:0032550//purine ribonucleoside binding;GO:0005524//ATP binding;GO:0032555//purine ribonucleotide binding;GO:…	GO:0006793//phosphorus metabolic process;GO:0043412//macromolecule modification;GO:0006464//cellular protein modification process;GO:0071704//organic substance metabolic process;GO:0019538//protein metabolic process;GO:0006796//phosphate-containing compound metabolic process;GO:0009987//cellular process;GO:0036211//protein modification process;GO:0044238//primary metabolic process;GO:0044237//cel…
BnaA01g11800D	75367.1	12665.5	3384.34	518.637	56520.3	10894.5	2817.56	492.71	-2.70608	5.55e-33	-2.51564	2.42996e-19	PREDICTED: peroxidase 42 [Brassica rapa]	Metabolism	Biosynthesis of other secondary metabolites;Global and Overview	ko01100//Metabolic pathways;ko01110//Biosynthesis of secondary metabolites;ko00940//Phenylpropanoid biosynthesis	K00430	-	GO:0097159//organic cyclic compound binding;GO:0016684//oxidoreductase activity, acting on peroxide as acceptor;GO:0046906//tetrapyrrole binding;GO:0003824//catalytic activity;GO:1901363//heterocyclic compound binding;GO:0016491//oxidoreductase activity;GO:0004601//peroxidase activity;GO:0016209//antioxidant activity;GO:0005488//binding;GO:0020037//heme binding	GO:0071704//organic substance metabolic process;GO:0030001//metal ion transport;GO:0019758//glycosinolate biosynthetic process;GO:0042221//response to chemical;GO:0008152//metabolic process;GO:1901135//carbohydrate derivative metabolic process;GO:0048878//chemical homeostasis;GO:0019757//glycosinolate metabolic process;GO:0044699//single-organism process;GO:0006810//transport;GO:0043436//oxoacid …
BnaA01g11830D	118.677	54.0867	10.22	4.27333	147.077	38	14.16	3.36667	-1.25796	0.000134897	-2.07243	5.48103e-09	PREDICTED: autophagy-related protein 8a [Brassica rapa]	Cellular Processes	Transport and catabolism	ko04140//Regulation of autophagy	K08341	GO:0043229//intracellular organelle;GO:0043231//intracellular membrane-bounded organelle;GO:0005623//cell;GO:0044446//intracellular organelle part;GO:0005622//intracellular;GO:0043227//membrane-bounded organelle;GO:0005773//vacuole;GO:0009536//plastid;GO:0044464//cell part;GO:0043226//organelle;GO:0044444//cytoplasmic part;GO:0005737//cytoplasm;GO:0044422//organelle part;GO:0044437//vacuolar part…	GO:0008641//small protein activating enzyme activity;GO:0003824//catalytic activity;GO:0016874//ligase activity;GO:0016787//hydrolase activity;GO:0016879//ligase activity, forming carbon-nitrogen bonds;GO:0016877//ligase activity, forming carbon-sulfur bonds;GO:0070011//peptidase activity, acting on L-amino acid peptides;GO:0008234//cysteine-type peptidase activity;GO:0019783//ubiquitin-like prot…	GO:0044237//cellular metabolic process;GO:0008152//metabolic process;GO:0044248//cellular catabolic process;GO:0009266//response to temperature stimulus;GO:0009056//catabolic process;GO:0043207//response to external biotic stimulus;GO:0009605//response to external stimulus;GO:0051707//response to other organism;GO:0009607//response to biotic stimulus;GO:0009987//cellular process;GO:0009620//respo…
BnaA01g11840D	652.16	331.083	25.02	11.5067	414.117	1324.31	17.69	49.6667	-1.12061	1.55e-05	1.48934	0.00111153	BnaA01g11840D [Brassica napus]	Metabolism	Energy metabolism;Global and Overview	ko01120//Microbial metabolism in diverse environments;ko00920//Sulfur metabolism	K05907	GO:0005622//intracellular;GO:0005737//cytoplasm;GO:0009536//plastid;GO:0044424//intracellular part;GO:0043231//intracellular membrane-bounded organelle;GO:0043226//organelle;GO:0043227//membrane-bounded organelle;GO:0044444//cytoplasmic part;GO:0005623//cell;GO:0043229//intracellular organelle;GO:0044464//cell part	GO:0003824//catalytic activity;GO:0016667//oxidoreductase activity, acting on a sulfur group of donors;GO:0016491//oxidoreductase activity	GO:0044763//single-organism cellular process;GO:0044237//cellular metabolic process;GO:0019725//cellular homeostasis;GO:0065007//biological regulation;GO:0006790//sulfur compound metabolic process;GO:0009987//cellular process;GO:0050794//regulation of cellular process;GO:0045454//cell redox homeostasis;GO:0019419//sulfate reduction;GO:0055114//oxidation-reduction process;GO:0044710//single-organi…
BnaA01g11850D	12.3333	0	0.483333	0.001	6.51333	13.6033	0.256667	0.513333	-8.91687	2.9e-06	1	0.54536	BnaA01g11850D [Brassica napus]	-	-	-	-	-	-	-
BnaA01g11860D	110.107	96.9933	4.76333	3.85667	126.787	56.1333	6.14667	2.46	-0.304617	0.390222	-1.32115	0.00633379	tyrosine sulfotransferase-like protein [Arabidopsis thaliana]	-	-	-	-	-	-	-
BnaA01g11870D	62.79	116.82	1.85667	3.21	111.167	53.2767	3.57333	1.52333	0.789858	0.124406	-1.23004	0.030778	PREDICTED: L-ascorbate oxidase homolog [Brassica napus]	-	-	-	-	GO:0071944//cell periphery;GO:0005911//cell-cell junction;GO:0030312//external encapsulating structure;GO:0005618//cell wall;GO:0005623//cell;GO:0044464//cell part;GO:0030054//cell junction	GO:0003824//catalytic activity;GO:0046914//transition metal ion binding;GO:0043167//ion binding;GO:0016491//oxidoreductase activity;GO:0005488//binding;GO:0005507//copper ion binding;GO:0043169//cation binding;GO:0046872//metal ion binding	GO:0016043//cellular component organization;GO:0022414//reproductive process;GO:0043480//pigment accumulation in tissues;GO:0048588//developmental cell growth;GO:0048856//anatomical structure development;GO:0071704//organic substance metabolic process;GO:0008202//steroid metabolic process;GO:0009411//response to UV;GO:0040007//growth;GO:0044238//primary metabolic process;GO:0009888//tissue develo…
BnaA01g11880D	3.33333	545.333	0.143333	21.7533	33.21	195.86	1.63	8.88333	7.24572	2.49e-81	2.44623	1.99225e-10	BnaA01g11880D [Brassica napus]	-	-	-	-	GO:0043229//intracellular organelle;GO:0044424//intracellular part;GO:0043227//membrane-bounded organelle;GO:0005622//intracellular;GO:0005623//cell;GO:0043226//organelle;GO:0044464//cell part;GO:0043231//intracellular membrane-bounded organelle	GO:0005488//binding;GO:0003676//nucleic acid binding;GO:0003677//DNA binding;GO:1901363//heterocyclic compound binding;GO:0001071//nucleic acid binding transcription factor activity;GO:0097159//organic cyclic compound binding	GO:0019438//aromatic compound biosynthetic process;GO:0034654//nucleobase-containing compound biosynthetic process;GO:0016070//RNA metabolic process;GO:0043170//macromolecule metabolic process;GO:0044238//primary metabolic process;GO:0090304//nucleic acid metabolic process;GO:1901362//organic cyclic compound biosynthetic process;GO:0009058//biosynthetic process;GO:0046483//heterocycle metabolic p…
BnaA01g11960D	16.0867	4.77	1.41333	0.393333	21.1633	2.66667	2.07667	0.233333	-1.84528	0.00481568	-3.15381	5.83688e-06	BnaA01g11960D [Brassica napus]	-	-	-	-	-	-	-
BnaA01g12040D	149.837	153.373	9.83333	9.15333	936.913	322.077	69.96	24.01	-0.103383	0.926768	-1.54289	0.00618928	BnaA01g12040D [Brassica napus]	-	-	-	-	GO:0044424//intracellular part;GO:0005623//cell;GO:0043229//intracellular organelle;GO:0005737//cytoplasm;GO:0043227//membrane-bounded organelle;GO:0044464//cell part;GO:0009536//plastid;GO:0044444//cytoplasmic part;GO:0043226//organelle;GO:0043231//intracellular membrane-bounded organelle;GO:0005622//intracellular	GO:0043167//ion binding;GO:0005506//iron ion binding;GO:0046872//metal ion binding;GO:0051536//iron-sulfur cluster binding;GO:0005488//binding;GO:0043169//cation binding;GO:0046914//transition metal ion binding;GO:0051540//metal cluster binding	GO:0009987//cellular process;GO:0009058//biosynthetic process;GO:0016226//iron-sulfur cluster assembly;GO:0022607//cellular component assembly;GO:0071840//cellular component organization or biogenesis;GO:0008152//metabolic process;GO:0044085//cellular component biogenesis;GO:0016043//cellular component organization;GO:0031163//metallo-sulfur cluster assembly
BnaA01g12060D	852.65	323.417	43.8467	15.1133	263.557	209.263	15.0433	10.8033	-1.53665	9.91e-10	-0.477648	0.128479	BnaA01g12060D [Brassica napus]	-	-	-	-	GO:0044424//intracellular part;GO:0044435//plastid part;GO:0009507//chloroplast;GO:0043227//membrane-bounded organelle;GO:0043226//organelle;GO:0009536//plastid;GO:0005622//intracellular;GO:0043231//intracellular membrane-bounded organelle;GO:0009532//plastid stroma;GO:0031976//plastid thylakoid;GO:0044446//intracellular organelle part;GO:0044444//cytoplasmic part;GO:0031984//organelle subcompart…	GO:0005198//structural molecule activity	-
BnaA01g12080D	1276.76	632.667	51.81	23.3433	864.44	634.333	39.17	26.18	-1.15022	6.07e-06	-0.581284	0.061207	PREDICTED: ubiquinol oxidase 4, chloroplastic/chromoplastic-like [Brassica napus]	-	-	-	-	GO:0005623//cell;GO:0005622//intracellular;GO:0044464//cell part;GO:0044424//intracellular part	GO:0016682//oxidoreductase activity, acting on diphenols and related substances as donors, oxygen as acceptor;GO:0009916//alternative oxidase activity;GO:0003824//catalytic activity;GO:0016491//oxidoreductase activity;GO:0016679//oxidoreductase activity, acting on diphenols and related substances as donors	GO:0006807//nitrogen compound metabolic process;GO:0016070//RNA metabolic process;GO:0032501//multicellular organismal process;GO:0009416//response to light stimulus;GO:0009628//response to abiotic stimulus;GO:0009314//response to radiation;GO:0071704//organic substance metabolic process;GO:0044238//primary metabolic process;GO:0097659//nucleic acid-templated transcription;GO:0006351//transcripti…
BnaA01g12090D	588.403	3369.32	18.6467	97.6633	535.877	2594.07	18.96	83.99	2.3889	3.64e-25	2.14726	1.37813e-13	BnaA03g45230D [Brassica napus]	-	-	-	-	-	-	-
BnaA01g12100D	116.283	31.26	4.21667	1.03333	61.46	48.1667	2.44333	1.73667	-2.0288	1.18e-08	-0.49253	0.332959	BnaA01g12100D [Brassica napus]	-	-	-	-	-	-	-
BnaA01g12120D	16.8733	3.33333	1.80667	0.34	21.54	3.36333	2.6	0.383333	-2.40972	0.000422596	-2.76184	0.00022046	BnaA01g12120D [Brassica napus]	-	-	-	-	GO:0044464//cell part;GO:0005622//intracellular;GO:0043227//membrane-bounded organelle;GO:0043229//intracellular organelle;GO:0043226//organelle;GO:0005623//cell;GO:0044424//intracellular part;GO:0043231//intracellular membrane-bounded organelle	-	GO:1902582//single-organism intracellular transport;GO:0010035//response to inorganic substance;GO:0015980//energy derivation by oxidation of organic compounds;GO:0051649//establishment of localization in cell;GO:0033036//macromolecule localization;GO:0006810//transport;GO:0044765//single-organism transport;GO:0009987//cellular process;GO:0051234//establishment of localization;GO:0008104//protein…
BnaA01g12130D	21.3333	14	0.573333	0.35	19	2.33333	0.553333	0.06	-0.712019	0.371016	-3.20511	0.000501043	BnaA01g12130D [Brassica napus]	-	-	-	-	GO:0044464//cell part;GO:0005622//intracellular;GO:0043231//intracellular membrane-bounded organelle;GO:0005623//cell;GO:0044424//intracellular part;GO:0043226//organelle;GO:0043229//intracellular organelle;GO:0043227//membrane-bounded organelle	-	-
BnaA01g12150D	292.623	74.2367	6.91667	1.61	214.527	63.5233	5.68333	1.60333	-2.10302	5.2e-14	-1.82566	1.52071e-06	PREDICTED: phosphatidate cytidylyltransferase 2 [Brassica napus]	Metabolism;Environmental Information Processing	Signal transduction;Global and Overview;Lipid metabolism	ko01100//Metabolic pathways;ko01110//Biosynthesis of secondary metabolites;ko00564//Glycerophospholipid metabolism;ko04070//Phosphatidylinositol signaling system	K00981	GO:0043227//membrane-bounded organelle;GO:0043229//intracellular organelle;GO:0005623//cell;GO:0016020//membrane;GO:0005622//intracellular;GO:0044464//cell part;GO:0044424//intracellular part;GO:0043226//organelle;GO:0043231//intracellular membrane-bounded organelle	GO:0004605//phosphatidate cytidylyltransferase activity;GO:0016779//nucleotidyltransferase activity;GO:0016740//transferase activity;GO:0016772//transferase activity, transferring phosphorus-containing groups;GO:0003824//catalytic activity;GO:0070567//cytidylyltransferase activity	GO:0006066//alcohol metabolic process;GO:0044763//single-organism cellular process;GO:0008610//lipid biosynthetic process;GO:0016094//polyprenol biosynthetic process;GO:0044237//cellular metabolic process;GO:0008152//metabolic process;GO:0008299//isoprenoid biosynthetic process;GO:0044710//single-organism metabolic process;GO:0046165//alcohol biosynthetic process;GO:0009987//cellular process;GO:0…
BnaA01g12160D	79	36.02	2.54	1.07	104.863	38.0667	3.74667	1.26	-1.24722	0.000724012	-1.57218	6.20575e-06	BnaA01g12160D [Brassica napus]	Genetic Information Processing	Transcription	ko03040//Spliceosome	K12847	-	GO:0046914//transition metal ion binding;GO:0043169//cation binding;GO:0046872//metal ion binding;GO:0043167//ion binding;GO:0008270//zinc ion binding;GO:0005488//binding	GO:0019941//modification-dependent protein catabolic process;GO:0044238//primary metabolic process;GO:0030163//protein catabolic process;GO:0008152//metabolic process;GO:0043632//modification-dependent macromolecule catabolic process;GO:0044260//cellular macromolecule metabolic process;GO:0044248//cellular catabolic process;GO:0009057//macromolecule catabolic process;GO:0006508//proteolysis;GO:00…
BnaA01g12180D	1.33333	0.666667	0.0833333	0.0366667	3.66667	0	0.25	0.001	-1.18442	0.850281	-7.96578	0.010094	transmembrane protein [Arabidopsis thaliana]	-	-	-	-	-	-	-
BnaA01g12200D	374.333	162.667	27.4333	10.9067	290.727	86.6267	23.7033	6.50667	-1.33072	1.03e-08	-1.8651	8.1409e-10	PREDICTED: ER membrane protein complex subunit 3-like [Brassica napus]	-	-	-	-	GO:0005623//cell;GO:0043227//membrane-bounded organelle;GO:0044424//intracellular part;GO:0043231//intracellular membrane-bounded organelle;GO:0016020//membrane;GO:0043226//organelle;GO:0005622//intracellular;GO:0044464//cell part;GO:0043229//intracellular organelle	-	GO:0071840//cellular component organization or biogenesis;GO:0051234//establishment of localization;GO:0032502//developmental process;GO:0044763//single-organism cellular process;GO:0040007//growth;GO:0006810//transport;GO:0044699//single-organism process;GO:0016043//cellular component organization;GO:0048869//cellular developmental process;GO:0009653//anatomical structure morphogenesis;GO:000998…
BnaA01g12280D	404.123	30.83	8.64	0.61	255.977	51.5233	6.09	1.08667	-3.82415	2.85e-43	-2.48653	4.4267e-12	PREDICTED: oxysterol-binding protein-related protein 2A-like isoform X2 [Brassica napus]	-	-	-	-	-	GO:0005488//binding;GO:0005515//protein binding;GO:0043168//anion binding;GO:0043167//ion binding;GO:0005543//phospholipid binding;GO:0008289//lipid binding	-
BnaA01g12290D	13.6667	3.33333	1.36333	0.323333	7	1.33333	0.826667	0.133333	-2.07604	0.0235922	-2.63227	0.0846696	BnaA01g12290D [Brassica napus]	-	-	-	-	GO:0016020//membrane	GO:0003824//catalytic activity	-
BnaA01g12310D	109.81	47.1867	4.13667	1.6	90.8333	55.4333	3.77333	2.04667	-1.3704	3.14e-05	-0.882563	0.0583311	BnaA01g12310D [Brassica napus]	-	-	-	-	GO:0016020//membrane	-	-
BnaA01g12320D	22.97	115.83	0.986667	4.59667	99.21	126.487	4.87667	5.65667	2.21995	1.14e-10	0.214057	0.638561	PREDICTED: probable trehalose-phosphate phosphatase G [Brassica rapa]	Metabolism	Carbohydrate metabolism;Global and Overview	ko01100//Metabolic pathways;ko00500//Starch and sucrose metabolism	K01087	-	GO:0003824//catalytic activity	GO:0044262//cellular carbohydrate metabolic process;GO:0016051//carbohydrate biosynthetic process;GO:0009987//cellular process;GO:0044710//single-organism metabolic process;GO:0009311//oligosaccharide metabolic process;GO:0044763//single-organism cellular process;GO:0005991//trehalose metabolic process;GO:0046351//disaccharide biosynthetic process;GO:0044238//primary metabolic process;GO:0071704/…
BnaA01g12340D	149.77	274.417	12.4333	21.2033	244.247	47.8033	23.1367	4.06667	0.770078	0.474643	-2.50826	1.21462e-12	PREDICTED: auxin-responsive protein SAUR36 [Brassica rapa]	Environmental Information Processing	Signal transduction	ko04075//Plant hormone signal transduction	K14488	GO:0005622//intracellular;GO:0043229//intracellular organelle;GO:0044464//cell part;GO:0005623//cell;GO:0044424//intracellular part;GO:0043226//organelle;GO:0043227//membrane-bounded organelle;GO:0043231//intracellular membrane-bounded organelle	-	GO:0042221//response to chemical;GO:0010033//response to organic substance;GO:0009725//response to hormone;GO:0009719//response to endogenous stimulus;GO:0050896//response to stimulus
BnaA01g12360D	281.737	210.71	11.1967	7.76667	481.723	151.983	21.47	6.29	-0.527702	0.0476779	-1.77119	6.24871e-11	BnaA01g12360D [Brassica napus]	-	-	-	-	-	GO:0005488//binding;GO:0005515//protein binding	-
BnaA01g12380D	797.99	103.277	26.81	3.15	1170.17	83.68	43.73	2.83	-3.08935	3.67e-30	-3.94975	1.32979e-40	BnaA01g12380D [Brassica napus]	-	-	-	-	-	GO:0005506//iron ion binding;GO:1901363//heterocyclic compound binding;GO:0043169//cation binding;GO:0097159//organic cyclic compound binding;GO:0009055//electron carrier activity;GO:0046914//transition metal ion binding;GO:0046872//metal ion binding;GO:0005488//binding;GO:0020037//heme binding;GO:0046906//tetrapyrrole binding;GO:0043167//ion binding	GO:0055114//oxidation-reduction process;GO:0008152//metabolic process;GO:0044710//single-organism metabolic process;GO:0044699//single-organism process
BnaA01g12400D	99.0567	19.3333	2.29333	0.4	77.3333	63.28	1.95333	1.44	-2.51937	6.65e-12	-0.439869	0.434216	BnaA01g12400D [Brassica napus]	-	-	-	-	GO:0016020//membrane	GO:0016301//kinase activity;GO:1901363//heterocyclic compound binding;GO:0016773//phosphotransferase activity, alcohol group as acceptor;GO:0004713//protein tyrosine kinase activity;GO:0003824//catalytic activity;GO:0001882//nucleoside binding;GO:0001883//purine nucleoside binding;GO:0005515//protein binding;GO:0097367//carbohydrate derivative binding;GO:0005524//ATP binding;GO:0004672//protein k…	GO:0019538//protein metabolic process;GO:0065007//biological regulation;GO:0050789//regulation of biological process;GO:0044237//cellular metabolic process;GO:0007167//enzyme linked receptor protein signaling pathway;GO:0044700//single organism signaling;GO:0016310//phosphorylation;GO:0007166//cell surface receptor signaling pathway;GO:0006468//protein phosphorylation;GO:0044238//primary metaboli…
BnaA01g12460D	16.6667	960.667	1.09333	58.46	7.66667	154.25	0.566667	10.9	5.74064	8.53e-71	4.26568	1.22353e-19	BnaA01g12460D [Brassica napus]	-	-	-	-	-	-	-
BnaA01g12470D	30.6667	47	0.896667	1.23667	30.6667	15.6667	0.993333	0.47	0.463813	0.298965	-1.07962	0.0308911	BnaA01g12470D [Brassica napus]	-	-	-	-	-	GO:0005488//binding;GO:0005515//protein binding	-
BnaA01g12490D	67.27	287.443	2.12333	8.39333	27.62	90.4	0.963333	2.96	1.98291	9.06e-12	1.61949	0.000326135	BnaA01g12490D [Brassica napus]	-	-	-	-	-	GO:0016597//amino acid binding;GO:0043168//anion binding;GO:0005488//binding;GO:0031406//carboxylic acid binding;GO:0043177//organic acid binding;GO:0043167//ion binding;GO:0097159//organic cyclic compound binding;GO:0003676//nucleic acid binding;GO:0036094//small molecule binding;GO:1901363//heterocyclic compound binding	GO:0008152//metabolic process
BnaA01g12510D	160.01	79.99	10.4267	4.76	155.333	48.6667	11.2733	3.14667	-1.13124	1.58e-05	-1.84102	2.81275e-06	BnaA01g12510D [Brassica napus]	-	-	-	-	GO:0044464//cell part;GO:0005622//intracellular;GO:0044424//intracellular part;GO:0043229//intracellular organelle;GO:0016020//membrane;GO:0043231//intracellular membrane-bounded organelle;GO:0043227//membrane-bounded organelle;GO:0005623//cell;GO:0044444//cytoplasmic part;GO:0005737//cytoplasm;GO:0009536//plastid;GO:0043226//organelle	-	GO:0015979//photosynthesis;GO:0006091//generation of precursor metabolites and energy;GO:0044237//cellular metabolic process;GO:0008152//metabolic process;GO:0009987//cellular process;GO:0019684//photosynthesis, light reaction
BnaA01g12590D	42.4367	33.3333	1.07333	0.773333	196	14	5.50667	0.35	-0.472936	0.264534	-3.97575	5.61333e-24	BnaA01g12590D [Brassica napus]	-	-	-	-	-	GO:0097159//organic cyclic compound binding;GO:0016772//transferase activity, transferring phosphorus-containing groups;GO:0004713//protein tyrosine kinase activity;GO:0043167//ion binding;GO:0016301//kinase activity;GO:0000166//nucleotide binding;GO:0035639//purine ribonucleoside triphosphate binding;GO:0001882//nucleoside binding;GO:0017076//purine nucleotide binding;GO:0032549//ribonucleoside …	GO:0044238//primary metabolic process;GO:0019538//protein metabolic process;GO:0043412//macromolecule modification;GO:0009987//cellular process;GO:0016310//phosphorylation;GO:0006468//protein phosphorylation;GO:0006796//phosphate-containing compound metabolic process;GO:0008152//metabolic process;GO:0036211//protein modification process;GO:0006464//cellular protein modification process;GO:0006793…
BnaA01g12640D	33.2133	15.0333	1.95	0.796667	34.02	10.1033	2.24	0.593333	-1.29143	0.00373777	-1.91658	0.00303195	BnaA01g12640D [Brassica napus]	Metabolism	Global and Overview;Carbohydrate metabolism	ko01100//Metabolic pathways;ko01110//Biosynthesis of secondary metabolites;ko00500//Starch and sucrose metabolism;ko00520//Amino sugar and nucleotide sugar metabolism	K00975	-	GO:0070566//adenylyltransferase activity;GO:0016772//transferase activity, transferring phosphorus-containing groups;GO:0016740//transferase activity;GO:0016779//nucleotidyltransferase activity;GO:0003824//catalytic activity	GO:0009250//glucan biosynthetic process;GO:0044238//primary metabolic process;GO:0034637//cellular carbohydrate biosynthetic process;GO:0005975//carbohydrate metabolic process;GO:1901576//organic substance biosynthetic process;GO:0033692//cellular polysaccharide biosynthetic process;GO:0005978//glycogen biosynthetic process;GO:0044710//single-organism metabolic process;GO:0009058//biosynthetic pr…
BnaA01g12650D	23.3333	2.33333	0.66	0.06	57	5.33333	1.75333	0.15	-3.45943	1.84e-06	-3.54707	1.75602e-09	BnaA01g12650D [Brassica napus]	-	-	-	-	-	GO:0016772//transferase activity, transferring phosphorus-containing groups;GO:0016740//transferase activity;GO:0032553//ribonucleotide binding;GO:0032559//adenyl ribonucleotide binding;GO:0004674//protein serine/threonine kinase activity;GO:0030554//adenyl nucleotide binding;GO:0035639//purine ribonucleoside triphosphate binding;GO:0036094//small molecule binding;GO:0043167//ion binding;GO:00018…	GO:0006464//cellular protein modification process;GO:0044238//primary metabolic process;GO:0071704//organic substance metabolic process;GO:0006468//protein phosphorylation;GO:0044267//cellular protein metabolic process;GO:0036211//protein modification process;GO:0006793//phosphorus metabolic process;GO:0016310//phosphorylation;GO:0006796//phosphate-containing compound metabolic process;GO:0019538…
BnaA01g12670D	37.1767	12.1967	1.12	0.343333	25.4567	3.33333	0.856667	0.103333	-1.70582	0.00110133	-3.05143	2.16954e-05	BnaA01g12670D [Brassica napus]	-	-	-	-	-	GO:0097159//organic cyclic compound binding;GO:0000166//nucleotide binding;GO:0016740//transferase activity;GO:0016773//phosphotransferase activity, alcohol group as acceptor;GO:0003824//catalytic activity;GO:0032553//ribonucleotide binding;GO:0017076//purine nucleotide binding;GO:0001882//nucleoside binding;GO:0035639//purine ribonucleoside triphosphate binding;GO:0016301//kinase activity;GO:003…	GO:0043412//macromolecule modification;GO:0009987//cellular process;GO:0044267//cellular protein metabolic process;GO:0019538//protein metabolic process;GO:0016310//phosphorylation;GO:0043170//macromolecule metabolic process;GO:0006793//phosphorus metabolic process;GO:0044238//primary metabolic process;GO:0071704//organic substance metabolic process;GO:0044260//cellular macromolecule metabolic pr…
BnaA01g12680D	12.6667	3.33333	0.563333	0.133333	47.2333	3.66667	2.32667	0.16	-2.07895	0.00266653	-3.86212	9.79186e-10	BnaA01g12680D [Brassica napus]	Metabolism	Global and Overview;Nucleotide metabolism	ko01100//Metabolic pathways;ko00240//Pyrimidine metabolism	K01465	-	GO:0016810//hydrolase activity, acting on carbon-nitrogen (but not peptide) bonds;GO:0016787//hydrolase activity;GO:0016812//hydrolase activity, acting on carbon-nitrogen (but not peptide) bonds, in cyclic amides;GO:0003824//catalytic activity;GO:0004151//dihydroorotase activity	GO:0009987//cellular process;GO:0006206//pyrimidine nucleobase metabolic process;GO:0008152//metabolic process;GO:0071704//organic substance metabolic process;GO:0072528//pyrimidine-containing compound biosynthetic process;GO:1901362//organic cyclic compound biosynthetic process;GO:0034641//cellular nitrogen compound metabolic process;GO:1901564//organonitrogen compound metabolic process;GO:19013…
BnaA01g12730D	7	0.333333	0.21	0.01	34.1167	0.666667	1.15333	0.0233333	-4.39232	0.0030088	-5.62727	8.74287e-11	BnaA01g12730D [Brassica napus]	-	-	-	-	-	-	-
BnaA01g12740D	104.767	26.3333	0.933333	0.21	48.3967	24.6667	0.476667	0.22	-2.152	6.85e-10	-1.11548	0.0276052	BnaA01g12740D [Brassica napus]	-	-	-	-	GO:0005623//cell;GO:0043231//intracellular membrane-bounded organelle;GO:0043229//intracellular organelle;GO:0005622//intracellular;GO:0044424//intracellular part;GO:0005634//nucleus;GO:0043227//membrane-bounded organelle;GO:0043226//organelle;GO:0044464//cell part	GO:0008233//peptidase activity;GO:0016787//hydrolase activity;GO:0003824//catalytic activity	GO:0006508//proteolysis;GO:0008152//metabolic process;GO:0019538//protein metabolic process;GO:0044238//primary metabolic process;GO:0043170//macromolecule metabolic process;GO:0071704//organic substance metabolic process
BnaA01g12790D	31.7933	5.33333	0.983333	0.156667	43.35	8	1.48	0.253333	-2.64998	5.85e-07	-2.54649	3.85709e-05	BnaA01g12790D [Brassica napus]	-	-	-	-	-	-	-
BnaA01g12800D	50.48	75	1.06	1.42	111.207	41.3333	2.57333	0.896667	0.421827	0.306002	-1.52099	0.000250278	BnaA01g12800D [Brassica napus]	-	-	-	-	GO:0044425//membrane part;GO:0044424//intracellular part;GO:0043227//membrane-bounded organelle;GO:0043226//organelle;GO:0005623//cell;GO:0044464//cell part;GO:0031224//intrinsic component of membrane;GO:0043229//intracellular organelle;GO:0043231//intracellular membrane-bounded organelle;GO:0005622//intracellular;GO:0016020//membrane;GO:0016021//integral component of membrane	-	GO:0044765//single-organism transport;GO:0044763//single-organism cellular process;GO:0044699//single-organism process;GO:0006810//transport;GO:0055085//transmembrane transport;GO:0051179//localization;GO:1902578//single-organism localization;GO:0009987//cellular process;GO:0051234//establishment of localization
BnaA01g12810D	42.6633	68.8167	1.62	2.39333	79.4833	30.6	3.40333	1.26333	0.563028	0.302164	-1.42971	0.00207783	BnaA01g12810D [Brassica napus]	-	-	-	-	GO:0044446//intracellular organelle part;GO:0005623//cell;GO:0043227//membrane-bounded organelle;GO:0031224//intrinsic component of membrane;GO:0098588//bounding membrane of organelle;GO:0044431//Golgi apparatus part;GO:0044425//membrane part;GO:0005737//cytoplasm;GO:0031300//intrinsic component of organelle membrane;GO:0044422//organelle part;GO:0043229//intracellular organelle;GO:0044444//cytop…	GO:0022891//substrate-specific transmembrane transporter activity;GO:0005338//nucleotide-sugar transmembrane transporter activity;GO:0015932//nucleobase-containing compound transmembrane transporter activity;GO:0022892//substrate-specific transporter activity;GO:1901677//phosphate transmembrane transporter activity;GO:0022857//transmembrane transporter activity;GO:0015165//pyrimidine nucleotide-s…	GO:0006810//transport;GO:0015781//pyrimidine nucleotide-sugar transport;GO:0044765//single-organism transport;GO:0044699//single-organism process;GO:0071705//nitrogen compound transport;GO:0006820//anion transport;GO:0051179//localization;GO:0006811//ion transport;GO:0006862//nucleotide transport;GO:0015931//nucleobase-containing compound transport;GO:0044763//single-organism cellular process;GO:…
BnaA01g12830D	2.33333	19.6667	0.2	1.58333	7	0	0.69	0.001	2.98489	2.25e-05	-9.43045	0.00104497	PREDICTED: lipid transfer-like protein VAS isoform X2 [Brassica rapa]	-	-	-	-	-	-	-
BnaA01g12870D	102.487	85.3833	3.43	2.57667	86.3333	304.017	3.21	10.1767	-0.412703	0.227219	1.66462	2.71015e-06	BnaA01g12870D [Brassica napus]	-	-	-	-	-	GO:0005488//binding;GO:0005515//protein binding	-
BnaA01g12890D	318.333	155	19.52	8.97667	790.333	329	53.2333	20.6267	-1.1207	0.0910178	-1.36782	0.0140771	BnaA01g12890D [Brassica napus]	-	-	-	-	-	-	-
BnaA01g12910D	12.2133	4	0.363333	0.106667	47.98	5.34667	1.56667	0.15	-1.76818	0.019728	-3.38466	8.00985e-09	BnaA01g12910D [Brassica napus]	-	-	-	-	-	GO:0032550//purine ribonucleoside binding;GO:0036094//small molecule binding;GO:0016740//transferase activity;GO:0000166//nucleotide binding;GO:0032559//adenyl ribonucleotide binding;GO:0097159//organic cyclic compound binding;GO:0004672//protein kinase activity;GO:0003824//catalytic activity;GO:0032553//ribonucleotide binding;GO:0001882//nucleoside binding;GO:1901265//nucleoside phosphate bindin…	GO:0071704//organic substance metabolic process;GO:0043170//macromolecule metabolic process;GO:0006464//cellular protein modification process;GO:0043412//macromolecule modification;GO:0044237//cellular metabolic process;GO:0006796//phosphate-containing compound metabolic process;GO:0044267//cellular protein metabolic process;GO:0016310//phosphorylation;GO:0008152//metabolic process;GO:0006793//ph…
BnaA01g12930D	973.897	823.197	24.0533	18.58	2351.65	810.47	64.9233	20.7733	-0.372486	0.288668	-1.644	2.98389e-07	BnaA01g12930D [Brassica napus]	-	-	-	-	-	GO:1901363//heterocyclic compound binding;GO:0016772//transferase activity, transferring phosphorus-containing groups;GO:0016773//phosphotransferase activity, alcohol group as acceptor;GO:0097159//organic cyclic compound binding;GO:0017076//purine nucleotide binding;GO:0004713//protein tyrosine kinase activity;GO:0030554//adenyl nucleotide binding;GO:0004672//protein kinase activity;GO:0001883//p…	GO:0006468//protein phosphorylation;GO:0019538//protein metabolic process;GO:0044260//cellular macromolecule metabolic process;GO:0044238//primary metabolic process;GO:0016310//phosphorylation;GO:0043170//macromolecule metabolic process;GO:0043412//macromolecule modification;GO:0006464//cellular protein modification process;GO:0009987//cellular process;GO:0071704//organic substance metabolic proc…
BnaA01g12940D	5	8.89333	0.136667	0.233333	74.0233	3.66667	2.33667	0.11	0.771731	0.504664	-4.40888	2.04947e-14	BnaA01g12940D [Brassica napus]	-	-	-	-	-	GO:1901363//heterocyclic compound binding;GO:0004672//protein kinase activity;GO:0097367//carbohydrate derivative binding;GO:0032559//adenyl ribonucleotide binding;GO:0032553//ribonucleotide binding;GO:0036094//small molecule binding;GO:0016772//transferase activity, transferring phosphorus-containing groups;GO:0016740//transferase activity;GO:0016301//kinase activity;GO:0001882//nucleoside bindi…	GO:0044238//primary metabolic process;GO:0044260//cellular macromolecule metabolic process;GO:0043412//macromolecule modification;GO:0019538//protein metabolic process;GO:0006796//phosphate-containing compound metabolic process;GO:0008152//metabolic process;GO:0006468//protein phosphorylation;GO:0043170//macromolecule metabolic process;GO:0036211//protein modification process;GO:0009987//cellular…
BnaA01g12950D	0	0.666667	0.001	0.01	2.66667	0	0.04	0.001	3.32193	0.695709	-5.32193	0.0417612	BnaA01g12950D [Brassica napus]	-	-	-	-	-	GO:1901363//heterocyclic compound binding;GO:0035639//purine ribonucleoside triphosphate binding;GO:0036094//small molecule binding;GO:1901265//nucleoside phosphate binding;GO:0004713//protein tyrosine kinase activity;GO:0004674//protein serine/threonine kinase activity;GO:0001882//nucleoside binding;GO:0097159//organic cyclic compound binding;GO:0043167//ion binding;GO:0016773//phosphotransferas…	GO:0036211//protein modification process;GO:0006796//phosphate-containing compound metabolic process;GO:0071704//organic substance metabolic process;GO:0009987//cellular process;GO:0044267//cellular protein metabolic process;GO:0044237//cellular metabolic process;GO:0044260//cellular macromolecule metabolic process;GO:0019538//protein metabolic process;GO:0043170//macromolecule metabolic process;…
BnaA01g12960D	6.66667	6.66667	0.186667	0.166667	74.3333	5	2.31333	0.15	-0.163499	0.995221	-3.94694	2.07921e-13	BnaA01g12960D [Brassica napus]	-	-	-	-	-	GO:0097159//organic cyclic compound binding;GO:0016772//transferase activity, transferring phosphorus-containing groups;GO:0032559//adenyl ribonucleotide binding;GO:0035639//purine ribonucleoside triphosphate binding;GO:0000166//nucleotide binding;GO:1901265//nucleoside phosphate binding;GO:0005524//ATP binding;GO:0032550//purine ribonucleoside binding;GO:0001883//purine nucleoside binding;GO:000…	GO:0044237//cellular metabolic process;GO:0009987//cellular process;GO:0006793//phosphorus metabolic process;GO:0043412//macromolecule modification;GO:0006796//phosphate-containing compound metabolic process;GO:0008152//metabolic process;GO:0044260//cellular macromolecule metabolic process;GO:0036211//protein modification process;GO:0044267//cellular protein metabolic process;GO:0071704//organic …
BnaA01g12990D	4.33333	0.666667	0.213333	0.03	5.66667	3.33333	0.303333	0.156667	-2.83007	0.0461562	-0.953206	0.565867	BnaA01g12990D [Brassica napus]	-	-	-	-	-	-	-
BnaA01g13000D	215.667	81.6667	15.9667	5.49667	166	93	13.6167	6.89667	-1.53843	1.63e-09	-0.981402	0.00255721	BnaC07g38120D [Brassica napus]	-	-	-	-	-	-	-
BnaA01g13020D	3.66667	0	0.19	0.001	1	0	0.0533333	0.001	-7.56986	0.0130335	-5.73697	0.453169	BnaA01g13020D [Brassica napus]	-	-	-	-	-	-	-
BnaA01g13060D	9.66667	28.6667	1.02667	2.81	6	23.6667	0.716667	2.58667	1.4526	0.0135257	1.85172	0.0184068	PREDICTED: RING-H2 finger protein ATL81 [Brassica rapa]	-	-	-	-	-	GO:0043167//ion binding;GO:0043169//cation binding;GO:0008270//zinc ion binding;GO:0005488//binding;GO:0046872//metal ion binding;GO:0046914//transition metal ion binding;GO:0005515//protein binding	-
BnaA01g13080D	46.57	60.5467	2.22333	2.60333	153.2	53.5767	8.14333	2.75667	0.227636	0.696359	-1.56269	0.000115138	BnaA01g13080D [Brassica napus]	-	-	-	-	-	-	-
BnaA01g13090D	41.1133	97.4833	1.23	2.6	24.5033	35.36	0.806667	1.06667	1.07985	0.00252448	0.403065	0.502539	BnaA01g13090D [Brassica napus]	-	-	-	-	-	GO:0003824//catalytic activity;GO:0016740//transferase activity	-
BnaA01g13130D	251.667	133.993	8.45333	4.07333	168.31	98.24	6.14667	3.23667	-1.05331	0.00156273	-0.925295	0.0411067	BnaA01g13130D [Brassica napus]	-	-	-	-	GO:0005623//cell;GO:0044464//cell part;GO:0030312//external encapsulating structure;GO:0071944//cell periphery	GO:0016787//hydrolase activity;GO:0016798//hydrolase activity, acting on glycosyl bonds;GO:0004650//polygalacturonase activity;GO:0004553//hydrolase activity, hydrolyzing O-glycosyl compounds;GO:0003824//catalytic activity	GO:0005975//carbohydrate metabolic process;GO:0071704//organic substance metabolic process;GO:0008152//metabolic process;GO:0044238//primary metabolic process
BnaA01g13140D	1.66667	0.333333	0.06	0.01	6.66667	1.33333	0.26	0.05	-2.58496	0.401972	-2.37851	0.0266851	BnaA01g13140D [Brassica napus]	-	-	-	-	-	GO:0005515//protein binding;GO:0005488//binding	GO:0009987//cellular process;GO:0050789//regulation of biological process;GO:0044699//single-organism process;GO:0050794//regulation of cellular process;GO:0007165//signal transduction;GO:0023052//signaling;GO:0051716//cellular response to stimulus;GO:0065007//biological regulation;GO:0050896//response to stimulus;GO:0044700//single organism signaling;GO:0044763//single-organism cellular process;…
BnaA01g13210D	34.1233	439.74	1.68333	19.3733	18.8	286.57	1.02333	14.72	3.52468	1.05e-21	3.84643	9.87866e-19	BnaA01g13210D [Brassica napus]	-	-	-	-	-	-	-
BnaA01g13280D	680.733	856.223	24.0367	27.4867	6462.62	2213.11	259.407	79.2733	0.193495	0.757479	-1.71031	2.33853e-05	PREDICTED: cystine lyase CORI3-like [Brassica napus]	Metabolism	Global and Overview;Metabolism of cofactors and vitamins;Amino acid metabolism;Biosynthesis of other secondary metabolites	ko01100//Metabolic pathways;ko01110//Biosynthesis of secondary metabolites;ko01130//Biosynthesis of antibiotics;ko01230//Biosynthesis of amino acids;ko00270//Cysteine and methionine metabolism;ko00400//Phenylalanine, tyrosine and tryptophan biosynthesis;ko00130//Ubiquinone and other terpenoid-quinone biosynthesis;ko00360//Phenylalanine metabolism;ko00350//Tyrosine metabolism;ko00960//Tropane, pip…	K00815	GO:0005576//extracellular region;GO:0043226//organelle;GO:0044464//cell part;GO:0044424//intracellular part;GO:0005623//cell;GO:0043229//intracellular organelle;GO:0043231//intracellular membrane-bounded organelle;GO:0043227//membrane-bounded organelle;GO:0005622//intracellular	GO:0043168//anion binding;GO:0016829//lyase activity;GO:0070547//L-tyrosine aminotransferase activity;GO:0003824//catalytic activity;GO:0016769//transferase activity, transferring nitrogenous groups;GO:0043167//ion binding;GO:0048037//cofactor binding;GO:0016846//carbon-sulfur lyase activity;GO:0030170//pyridoxal phosphate binding;GO:0008483//transaminase activity;GO:1901363//heterocyclic compoun…	GO:0044763//single-organism cellular process;GO:0016053//organic acid biosynthetic process;GO:0019438//aromatic compound biosynthetic process;GO:1901362//organic cyclic compound biosynthetic process;GO:0006950//response to stress;GO:0043436//oxoacid metabolic process;GO:0006807//nitrogen compound metabolic process;GO:0032787//monocarboxylic acid metabolic process;GO:0044283//small molecule biosyn…
BnaA01g13290D	127	68.6667	9.97667	4.91667	109.333	37	9.47333	3.00667	-1.02088	0.0139709	-1.65571	7.83941e-05	BnaA01g13290D [Brassica napus]	-	-	-	-	-	-	-
BnaA01g13300D	26.3333	10	1.84667	0.64	30	6	2.33667	0.426667	-1.52878	0.00324421	-2.45327	1.93479e-05	PREDICTED: 50S ribosomal protein L25-like [Brassica oleracea var. oleracea] [Brassica oleracea]	Genetic Information Processing	Translation	ko03010//Ribosome	K02897	GO:0005622//intracellular;GO:0032991//macromolecular complex;GO:0043232//intracellular non-membrane-bounded organelle;GO:0005737//cytoplasm;GO:0044444//cytoplasmic part;GO:0044464//cell part;GO:0044424//intracellular part;GO:0005623//cell;GO:0043228//non-membrane-bounded organelle;GO:0005840//ribosome;GO:0043229//intracellular organelle;GO:0043226//organelle;GO:0030529//intracellular ribonucleopr…	GO:0046872//metal ion binding;GO:0046914//transition metal ion binding;GO:0008097//5S rRNA binding;GO:0003676//nucleic acid binding;GO:0019843//rRNA binding;GO:0003735//structural constituent of ribosome;GO:1901363//heterocyclic compound binding;GO:0005488//binding;GO:0097159//organic cyclic compound binding;GO:0003723//RNA binding;GO:0005198//structural molecule activity;GO:0043169//cation bindi…	GO:0044249//cellular biosynthetic process;GO:0010467//gene expression;GO:1901362//organic cyclic compound biosynthetic process;GO:0043603//cellular amide metabolic process;GO:0019538//protein metabolic process;GO:0034645//cellular macromolecule biosynthetic process;GO:0009987//cellular process;GO:0008152//metabolic process;GO:0006779//porphyrin-containing compound biosynthetic process;GO:0051188/…
BnaA01g13340D	40	13.3333	1.43667	0.423333	53	19.3333	2.09333	0.673333	-1.76286	0.00423616	-1.63641	0.0011641	BnaA01g13340D [Brassica napus]	Metabolism	Metabolism of cofactors and vitamins;Global and Overview	ko01100//Metabolic pathways;ko01110//Biosynthesis of secondary metabolites;ko00130//Ubiquinone and other terpenoid-quinone biosynthesis	K06125	GO:0016021//integral component of membrane;GO:0044425//membrane part;GO:0016020//membrane;GO:0031224//intrinsic component of membrane	GO:0016765//transferase activity, transferring alkyl or aryl (other than methyl) groups;GO:0003824//catalytic activity;GO:0004659//prenyltransferase activity;GO:0016740//transferase activity;GO:0002094//polyprenyltransferase activity	GO:0044281//small molecule metabolic process;GO:0006743//ubiquinone metabolic process;GO:0044283//small molecule biosynthetic process;GO:0071704//organic substance metabolic process;GO:0009058//biosynthetic process;GO:0006082//organic acid metabolic process;GO:0044699//single-organism process;GO:0007275//multicellular organism development;GO:0044237//cellular metabolic process;GO:0032787//monocar…
BnaA01g13350D	5.66667	19.6667	0.383333	1.22333	13.3333	5.33333	1.02333	0.373333	1.67415	0.0481488	-1.45474	0.0498312	PREDICTED: MLP-like protein 328 [Brassica rapa]	-	-	-	-	-	GO:0046914//transition metal ion binding;GO:0043169//cation binding;GO:0043167//ion binding;GO:0005488//binding;GO:0046872//metal ion binding	GO:0009743//response to carbohydrate;GO:0010038//response to metal ion;GO:0043207//response to external biotic stimulus;GO:0000096//sulfur amino acid metabolic process;GO:0044272//sulfur compound biosynthetic process;GO:0009058//biosynthetic process;GO:0010033//response to organic substance;GO:0044283//small molecule biosynthetic process;GO:0043436//oxoacid metabolic process;GO:0010035//response …
BnaA01g13360D	10.8633	0.666667	0.256667	0.0133333	41	2.66667	1.08	0.0633333	-4.26679	6.53e-05	-4.09192	1.85917e-07	BnaA01g13360D [Brassica napus]	-	-	-	-	GO:0016021//integral component of membrane;GO:0044425//membrane part;GO:0016020//membrane;GO:0031224//intrinsic component of membrane	GO:0022804//active transmembrane transporter activity;GO:0005215//transporter activity;GO:0015297//antiporter activity;GO:0015075//ion transmembrane transporter activity;GO:0015078//hydrogen ion transmembrane transporter activity;GO:0015077//monovalent inorganic cation transmembrane transporter activity;GO:0022891//substrate-specific transmembrane transporter activity;GO:0015298//solute:cation an…	GO:0006812//cation transport;GO:0009987//cellular process;GO:0044699//single-organism process;GO:0055085//transmembrane transport;GO:0006811//ion transport;GO:0051179//localization;GO:0044763//single-organism cellular process;GO:1902578//single-organism localization;GO:0006810//transport;GO:0051234//establishment of localization;GO:0044765//single-organism transport
BnaA01g13370D	22.8467	17.6667	2.22333	1.56667	89	22.5533	9.61	2.31333	-0.505026	0.561134	-2.05456	4.87787e-05	BnaA01g13370D [Brassica napus]	Cellular Processes;Metabolism	Global and Overview;Energy metabolism;Transport and catabolism	ko01100//Metabolic pathways;ko00190//Oxidative phosphorylation;ko04145//Phagosome	K02152	GO:0032991//macromolecular complex;GO:0005622//intracellular;GO:0044444//cytoplasmic part;GO:0005773//vacuole;GO:0044424//intracellular part;GO:0043226//organelle;GO:0098805//whole membrane;GO:0043229//intracellular organelle;GO:0044446//intracellular organelle part;GO:0098588//bounding membrane of organelle;GO:0005623//cell;GO:0043227//membrane-bounded organelle;GO:0043234//protein complex;GO:00…	-	GO:0015992//proton transport;GO:0006811//ion transport;GO:0051179//localization;GO:1902578//single-organism localization;GO:0044699//single-organism process;GO:0006810//transport;GO:0051234//establishment of localization;GO:0006812//cation transport;GO:0006818//hydrogen transport;GO:0015672//monovalent inorganic cation transport;GO:0044765//single-organism transport
BnaA01g13390D	516.523	192.943	19.9833	6.75	392.383	462.65	16.89	18.4067	-1.56584	8.41e-09	0.124059	0.76942	BnaA01g13390D [Brassica napus]	Metabolism	Carbohydrate metabolism;Global and Overview	ko01100//Metabolic pathways;ko01110//Biosynthesis of secondary metabolites;ko01130//Biosynthesis of antibiotics;ko01120//Microbial metabolism in diverse environments;ko00010//Glycolysis / Gluconeogenesis	K01792	GO:0005623//cell;GO:0043229//intracellular organelle;GO:0043227//membrane-bounded organelle;GO:0043231//intracellular membrane-bounded organelle;GO:0043226//organelle;GO:0005622//intracellular;GO:0044464//cell part;GO:0044424//intracellular part	GO:0030246//carbohydrate binding;GO:0005488//binding;GO:0003824//catalytic activity;GO:0016853//isomerase activity	GO:0044723//single-organism carbohydrate metabolic process;GO:0005996//monosaccharide metabolic process;GO:0008152//metabolic process;GO:0044238//primary metabolic process;GO:0019318//hexose metabolic process;GO:0044281//small molecule metabolic process;GO:0071704//organic substance metabolic process;GO:0044710//single-organism metabolic process;GO:0005975//carbohydrate metabolic process;GO:00446…
BnaA01g13400D	335.103	87.5833	8.80333	2.11667	310.667	113.667	9.12333	3.01667	-2.05626	1.37e-16	-1.59661	2.88614e-06	BnaA01g13400D [Brassica napus]	-	-	-	-	GO:0016020//membrane	GO:0016301//kinase activity;GO:0016773//phosphotransferase activity, alcohol group as acceptor;GO:0032549//ribonucleoside binding;GO:0032553//ribonucleotide binding;GO:0004672//protein kinase activity;GO:0001883//purine nucleoside binding;GO:0030554//adenyl nucleotide binding;GO:1901363//heterocyclic compound binding;GO:0032559//adenyl ribonucleotide binding;GO:0097159//organic cyclic compound bi…	GO:0010073//meristem maintenance;GO:0023052//signaling;GO:0009888//tissue development;GO:0016310//phosphorylation;GO:0051716//cellular response to stimulus;GO:0071704//organic substance metabolic process;GO:0007166//cell surface receptor signaling pathway;GO:0044763//single-organism cellular process;GO:0043170//macromolecule metabolic process;GO:0048507//meristem development;GO:0050794//regulatio…
BnaA01g13430D	36.03	14.9767	1.5	0.566667	42.6733	19.5167	1.94	0.783333	-1.40439	0.00524133	-1.30836	0.0851787	BnaA01g13430D [Brassica napus]	-	-	-	-	-	-	-
BnaA01g13440D	398.697	152.93	19.6733	7.02333	2549.03	112.907	144.447	5.95	-1.48601	0.0126227	-4.6015	1.18926e-43	probable WRKY transcription factor 53 [Brassica napus]	-	-	-	-	GO:0005623//cell;GO:0009536//plastid;GO:0043226//organelle;GO:0005622//intracellular;GO:0044444//cytoplasmic part;GO:0043227//membrane-bounded organelle;GO:0005737//cytoplasm;GO:0044424//intracellular part;GO:0043231//intracellular membrane-bounded organelle;GO:0044464//cell part;GO:0043229//intracellular organelle	GO:0003677//DNA binding;GO:0001071//nucleic acid binding transcription factor activity;GO:0005488//binding;GO:0003676//nucleic acid binding;GO:0043565//sequence-specific DNA binding;GO:1901363//heterocyclic compound binding;GO:0003700//transcription factor activity, sequence-specific DNA binding;GO:0097159//organic cyclic compound binding	GO:0006886//intracellular protein transport;GO:0044700//single organism signaling;GO:0006351//transcription, DNA-templated;GO:0008219//cell death;GO:0009814//defense response, incompatible interaction;GO:0032870//cellular response to hormone stimulus;GO:0009987//cellular process;GO:0019752//carboxylic acid metabolic process;GO:0018958//phenol-containing compound metabolic process;GO:0051179//loca…
BnaA01g13460D	41.7067	10.7767	1.59667	0.376667	46.6267	9.81333	1.94667	0.36	-2.0837	0.000277284	-2.43494	0.0107624	BnaA01g13460D [Brassica napus]	-	-	-	-	-	GO:0004553//hydrolase activity, hydrolyzing O-glycosyl compounds;GO:0003824//catalytic activity;GO:0016798//hydrolase activity, acting on glycosyl bonds;GO:0004650//polygalacturonase activity;GO:0016787//hydrolase activity	GO:0008152//metabolic process;GO:0071704//organic substance metabolic process;GO:0044238//primary metabolic process;GO:0005975//carbohydrate metabolic process
BnaA01g13470D	911.157	2568.38	21.8533	56.2133	1709.27	1833.61	46.0267	47.2867	1.36306	4.31e-07	0.0389635	0.998516	BnaA01g13470D [Brassica napus]	Cellular Processes;Metabolism	Global and Overview;Lipid metabolism;Transport and catabolism	ko01100//Metabolic pathways;ko04146//Peroxisome;ko01212//Fatty acid metabolism;ko00061//Fatty acid biosynthesis;ko00071//Fatty acid degradation	K01897	GO:0005622//intracellular;GO:0044464//cell part;GO:0016020//membrane;GO:0043227//membrane-bounded organelle;GO:0044444//cytoplasmic part;GO:0044424//intracellular part;GO:0043231//intracellular membrane-bounded organelle;GO:0005623//cell;GO:0043229//intracellular organelle;GO:0005737//cytoplasm;GO:0043226//organelle	GO:0015645//fatty acid ligase activity;GO:0016874//ligase activity;GO:0003824//catalytic activity;GO:0016877//ligase activity, forming carbon-sulfur bonds	GO:0050896//response to stimulus;GO:0009698//phenylpropanoid metabolic process;GO:0019752//carboxylic acid metabolic process;GO:0044710//single-organism metabolic process;GO:1901576//organic substance biosynthetic process;GO:0051704//multi-organism process;GO:0006725//cellular aromatic compound metabolic process;GO:0044763//single-organism cellular process;GO:0051707//response to other organism;G…
BnaA01g13500D	330.507	877.153	25.69	62.3133	302.333	793.55	26.4033	63.8267	1.27833	5.28e-05	1.27344	2.28145e-06	BnaA08g15110D [Brassica napus]	-	-	-	-	-	-	-
BnaA01g13510D	721.933	102.76	56.25	7.31333	763.217	227	65.8367	18.2267	-2.94325	5.02e-28	-1.85284	8.48583e-09	BnaA01g13510D [Brassica napus]	-	-	-	-	-	-	-
BnaA01g13520D	39.3333	17	2.53333	0.99	54.3333	13.6667	3.83	0.856667	-1.35554	0.00622662	-2.16054	3.10757e-05	BnaA01g13520D [Brassica napus]	Metabolism	Nucleotide metabolism;Global and Overview	ko01100//Metabolic pathways;ko01110//Biosynthesis of secondary metabolites;ko01130//Biosynthesis of antibiotics;ko00230//Purine metabolism;ko00240//Pyrimidine metabolism	K00940	GO:0044424//intracellular part;GO:0044464//cell part;GO:0005623//cell;GO:0005622//intracellular;GO:0043227//membrane-bounded organelle;GO:0044444//cytoplasmic part;GO:0005737//cytoplasm;GO:0043231//intracellular membrane-bounded organelle;GO:0043226//organelle;GO:0043229//intracellular organelle;GO:0009536//plastid	GO:0043169//cation binding;GO:0046914//transition metal ion binding;GO:0032553//ribonucleotide binding;GO:0032549//ribonucleoside binding;GO:0016740//transferase activity;GO:0004550//nucleoside diphosphate kinase activity;GO:0016772//transferase activity, transferring phosphorus-containing groups;GO:0019205//nucleobase-containing compound kinase activity;GO:0005524//ATP binding;GO:0001882//nucleo…	GO:0016310//phosphorylation;GO:0009206//purine ribonucleoside triphosphate biosynthetic process;GO:0042451//purine nucleoside biosynthetic process;GO:0009165//nucleotide biosynthetic process;GO:0006228//UTP biosynthetic process;GO:0042455//ribonucleoside biosynthetic process;GO:0009201//ribonucleoside triphosphate biosynthetic process;GO:0006164//purine nucleotide biosynthetic process;GO:0006241/…
BnaA01g13530D	84.4967	185.3	4.06667	8.17667	75	180.01	4.04333	8.90333	1.00767	0.000109237	1.1388	0.000161975	BnaC01g15750D [Brassica napus]	-	-	-	-	-	-	-
BnaA01g13550D	47.2767	14.1833	3.84333	1.05667	57.7667	17.9567	5.24333	1.47333	-1.86284	9.35e-06	-1.8314	2.44898e-05	BnaA01g13550D [Brassica napus]	-	-	-	-	-	-	-
BnaA01g13560D	483.21	206.807	9.84667	3.83333	683.103	204.98	15.44	4.29667	-1.36104	1.02e-08	-1.84538	1.50698e-10	BnaA01g13560D [Brassica napus]	-	-	-	-	-	GO:1901363//heterocyclic compound binding;GO:0016818//hydrolase activity, acting on acid anhydrides, in phosphorus-containing anhydrides;GO:0032555//purine ribonucleotide binding;GO:0036094//small molecule binding;GO:0035639//purine ribonucleoside triphosphate binding;GO:0003824//catalytic activity;GO:0016817//hydrolase activity, acting on acid anhydrides;GO:0005488//binding;GO:0032553//ribonucle…	GO:0006508//proteolysis;GO:0019538//protein metabolic process;GO:0008152//metabolic process;GO:0043170//macromolecule metabolic process;GO:0044238//primary metabolic process;GO:0071704//organic substance metabolic process
BnaA01g13580D	41.3333	55.46	0.99	1.20667	71.3333	31.3333	1.87333	0.773333	0.285527	0.48275	-1.27645	0.000910303	BnaA01g13580D [Brassica napus]	Environmental Information Processing	Signal transduction	ko04075//Plant hormone signal transduction	K14486	GO:0044424//intracellular part;GO:0005623//cell;GO:0043226//organelle;GO:0043227//membrane-bounded organelle;GO:0044464//cell part;GO:0043229//intracellular organelle;GO:0043231//intracellular membrane-bounded organelle;GO:0005634//nucleus;GO:0005622//intracellular	GO:0005515//protein binding;GO:0005488//binding;GO:0097159//organic cyclic compound binding;GO:0003677//DNA binding;GO:0003676//nucleic acid binding;GO:1901363//heterocyclic compound binding;GO:0046983//protein dimerization activity	GO:0042221//response to chemical;GO:0010033//response to organic substance;GO:0009725//response to hormone;GO:0050896//response to stimulus;GO:0009719//response to endogenous stimulus
BnaA01g13610D	151.11	24.3933	11.2667	1.66667	94.9667	32.6467	7.70333	2.41333	-2.75702	2.7e-18	-1.67446	0.000533254	BnaA01g13610D [Brassica napus]	-	-	-	-	GO:0043227//membrane-bounded organelle;GO:0044464//cell part;GO:0044424//intracellular part;GO:0043229//intracellular organelle;GO:0043226//organelle;GO:0005622//intracellular;GO:0043231//intracellular membrane-bounded organelle;GO:0005623//cell	-	-
BnaA01g13620D	154.667	72.6667	5.45	2.29667	65.6667	75.3333	2.44333	2.56	-1.24671	0.000106326	0.0672931	1	hydrolase, alpha/beta fold family protein [Arabidopsis lyrata subsp. lyrata] [Arabidopsis lyrata]	-	-	-	-	-	GO:0003824//catalytic activity	-
BnaA01g13650D	106.667	54	2.29	1.07333	93.6667	37	2.23	0.806667	-1.09325	0.00127072	-1.467	4.10389e-05	BnaA01g13650D [Brassica napus]	-	-	-	-	-	-	-
BnaA01g13670D	3388.06	780.663	50.0533	10.5033	3348.89	907.883	54.7133	13.6333	-2.25262	2.84e-22	-2.00475	5.12736e-15	BnaA01g13670D [Brassica napus]	Genetic Information Processing;Organismal Systems	Environmental adaptation;Folding, sorting and degradation	ko04141//Protein processing in endoplasmic reticulum;ko04626//Plant-pathogen interaction	K09487	GO:0005773//vacuole;GO:0005737//cytoplasm;GO:0030054//cell junction;GO:0044437//vacuolar part;GO:0043229//intracellular organelle;GO:0044446//intracellular organelle part;GO:0005911//cell-cell junction;GO:0043226//organelle;GO:0044422//organelle part;GO:0044464//cell part;GO:0005622//intracellular;GO:0043227//membrane-bounded organelle;GO:0016020//membrane;GO:0005576//extracellular region;GO:0009…	GO:0005524//ATP binding;GO:0032553//ribonucleotide binding;GO:0005488//binding;GO:0000166//nucleotide binding;GO:0030554//adenyl nucleotide binding;GO:0043167//ion binding;GO:0017076//purine nucleotide binding;GO:1901363//heterocyclic compound binding;GO:0032550//purine ribonucleoside binding;GO:0001883//purine nucleoside binding;GO:0032549//ribonucleoside binding;GO:0005515//protein binding;GO:0…	GO:0006497//protein lipidation;GO:0015031//protein transport;GO:0048532//anatomical structure arrangement;GO:0006950//response to stress;GO:0044710//single-organism metabolic process;GO:0010038//response to metal ion;GO:0044281//small molecule metabolic process;GO:0044707//single-multicellular organism process;GO:0009653//anatomical structure morphogenesis;GO:0033036//macromolecule localization;G…
BnaA01g13710D	85.3333	17.6667	3.15667	0.603333	108.667	14.3333	4.53	0.533333	-2.38737	4.13e-08	-3.0864	1.67777e-12	BnaA01g13710D [Brassica napus]	-	-	-	-	-	GO:0048037//cofactor binding;GO:0050662//coenzyme binding;GO:0043167//ion binding;GO:0000062//fatty-acyl-CoA binding;GO:0043168//anion binding;GO:0005488//binding;GO:1901681//sulfur compound binding	-
BnaA01g13720D	173.643	20.3333	7.40667	0.796667	233.937	16	11.2433	0.706667	-3.21678	2.57e-22	-3.9919	4.91744e-30	BnaA01g13720D [Brassica napus]	-	-	-	-	-	GO:0001071//nucleic acid binding transcription factor activity;GO:0003677//DNA binding;GO:0005488//binding;GO:0097159//organic cyclic compound binding;GO:1901363//heterocyclic compound binding;GO:0043565//sequence-specific DNA binding;GO:0003700//transcription factor activity, sequence-specific DNA binding;GO:0003676//nucleic acid binding	-
BnaA01g13760D	450.87	212.04	9.61667	4.13667	332.797	58.0533	7.84	1.24667	-1.21707	4.51e-07	-2.65278	3.2432e-19	BnaA01g13760D [Brassica napus]	-	-	-	-	GO:0005622//intracellular;GO:0044424//intracellular part;GO:0043231//intracellular membrane-bounded organelle;GO:0044464//cell part;GO:0043229//intracellular organelle;GO:0043227//membrane-bounded organelle;GO:0005623//cell;GO:0043226//organelle	GO:0097159//organic cyclic compound binding;GO:0000166//nucleotide binding;GO:0003676//nucleic acid binding;GO:0005515//protein binding;GO:1901265//nucleoside phosphate binding;GO:0005488//binding;GO:0036094//small molecule binding;GO:1901363//heterocyclic compound binding	GO:0032502//developmental process;GO:0006396//RNA processing;GO:0009987//cellular process;GO:0046483//heterocycle metabolic process;GO:0008152//metabolic process;GO:0044260//cellular macromolecule metabolic process;GO:0010467//gene expression;GO:0000003//reproduction;GO:0006725//cellular aromatic compound metabolic process;GO:0006139//nucleobase-containing compound metabolic process;GO:0022414//r…
BnaA01g13770D	113.333	19	11.37	1.72	123.333	18.3333	13.6933	1.80667	-2.72475	3.18e-15	-2.92207	8.15864e-13	BnaA01g13770D [Brassica napus]	-	-	-	-	-	-	GO:0006950//response to stress;GO:0050896//response to stimulus
BnaA01g13780D	281.91	230.537	8.50667	6.37	331.693	116.497	11.15	3.65333	-0.417301	0.0958995	-1.60976	8.46222e-09	BnaA01g13780D [Brassica napus]	Cellular Processes;Genetic Information Processing	Folding, sorting and degradation;Transport and catabolism;Transcription	ko04141//Protein processing in endoplasmic reticulum;ko03040//Spliceosome;ko04144//Endocytosis	K03283	-	GO:0097367//carbohydrate derivative binding;GO:0032549//ribonucleoside binding;GO:0032553//ribonucleotide binding;GO:0035639//purine ribonucleoside triphosphate binding;GO:0001882//nucleoside binding;GO:0017076//purine nucleotide binding;GO:0000166//nucleotide binding;GO:0030554//adenyl nucleotide binding;GO:0036094//small molecule binding;GO:0001883//purine nucleoside binding;GO:0097159//organic…	GO:0009987//cellular process;GO:0006457//protein folding
BnaA01g13810D	6.33333	3.33333	0.55	0.273333	76	1.66667	7.32333	0.17	-1.00877	0.544421	-5.42889	5.76415e-11	BnaA08g14730D [Brassica napus]	-	-	-	-	GO:0043226//organelle;GO:0043227//membrane-bounded organelle;GO:0005622//intracellular;GO:0005623//cell;GO:0043229//intracellular organelle;GO:0043231//intracellular membrane-bounded organelle;GO:0044464//cell part;GO:0044424//intracellular part	-	-
BnaA01g13860D	490.317	58	24.7333	2.7	764.55	41.4633	43.1567	2.09	-3.19543	2.27e-36	-4.36801	8.15592e-33	BnaA01g13860D [Brassica napus]	-	-	-	-	-	GO:0003824//catalytic activity	GO:0055086//nucleobase-containing small molecule metabolic process;GO:0044237//cellular metabolic process;GO:0044281//small molecule metabolic process;GO:0044710//single-organism metabolic process;GO:0044699//single-organism process;GO:0006725//cellular aromatic compound metabolic process;GO:0044238//primary metabolic process;GO:0006807//nitrogen compound metabolic process;GO:1901564//organonitro…
BnaA01g13880D	320.07	461.587	20.7233	27.51	678.933	324.223	49.4433	21.3633	0.4087	0.453402	-1.21064	7.10356e-05	BnaA01g13880D [Brassica napus]	-	-	-	-	-	-	GO:0009607//response to biotic stimulus;GO:0006811//ion transport;GO:0009692//ethylene metabolic process;GO:0044699//single-organism process;GO:0009694//jasmonic acid metabolic process;GO:0032787//monocarboxylic acid metabolic process;GO:0006082//organic acid metabolic process;GO:0019752//carboxylic acid metabolic process;GO:1900673//olefin metabolic process;GO:0044763//single-organism cellular p…
BnaA01g13920D	173.793	57.73	3.90667	1.17333	137.15	67.6	3.41333	1.57333	-1.73533	1.74e-06	-1.11736	0.000694511	BnaA01g13920D [Brassica napus]	-	-	-	-	GO:0044464//cell part;GO:0043227//membrane-bounded organelle;GO:0043226//organelle;GO:0044424//intracellular part;GO:0043231//intracellular membrane-bounded organelle;GO:0005623//cell;GO:0005622//intracellular;GO:0005634//nucleus;GO:0043229//intracellular organelle	GO:0005515//protein binding;GO:0003676//nucleic acid binding;GO:0003700//transcription factor activity, sequence-specific DNA binding;GO:0003677//DNA binding;GO:1901363//heterocyclic compound binding;GO:0005488//binding;GO:0001071//nucleic acid binding transcription factor activity;GO:0097159//organic cyclic compound binding;GO:0046983//protein dimerization activity	-
BnaA01g13950D	710.747	20.3333	38.15	0.993333	1260.1	4.66667	75.8367	0.25	-5.26326	4.54e-12	-8.24482	1.70606e-73	BnaA01g13950D [Brassica napus]	-	-	-	-	GO:0044464//cell part;GO:0005622//intracellular;GO:0044422//organelle part;GO:0043226//organelle;GO:0043227//membrane-bounded organelle;GO:0044446//intracellular organelle part;GO:0031090//organelle membrane;GO:0005623//cell;GO:0019866//organelle inner membrane;GO:0031967//organelle envelope;GO:0016020//membrane;GO:0044424//intracellular part;GO:0031975//envelope;GO:0043229//intracellular organel…	GO:0005342//organic acid transmembrane transporter activity;GO:0008509//anion transmembrane transporter activity;GO:0022857//transmembrane transporter activity;GO:0022892//substrate-specific transporter activity;GO:0008514//organic anion transmembrane transporter activity;GO:0046943//carboxylic acid transmembrane transporter activity;GO:0015075//ion transmembrane transporter activity;GO:0022891//…	GO:0044699//single-organism process;GO:0071704//organic substance metabolic process;GO:0042221//response to chemical;GO:0006950//response to stress;GO:0046907//intracellular transport;GO:0051179//localization;GO:0044765//single-organism transport;GO:0051649//establishment of localization in cell;GO:0009987//cellular process;GO:0009692//ethylene metabolic process;GO:1902578//single-organism locali…
BnaA01g13960D	36.1767	10.6667	0.683333	0.176667	23.32	10.6667	0.493333	0.206667	-1.95156	0.000206947	-1.25526	0.0234507	BnaA01g13960D [Brassica napus]	-	-	-	-	GO:0005622//intracellular;GO:0005623//cell;GO:0044464//cell part	GO:0043168//anion binding;GO:0043167//ion binding;GO:0005488//binding;GO:0008289//lipid binding;GO:0005515//protein binding;GO:0005543//phospholipid binding	GO:0009987//cellular process;GO:0044700//single organism signaling;GO:0044763//single-organism cellular process;GO:0050789//regulation of biological process;GO:0050896//response to stimulus;GO:0023052//signaling;GO:0050794//regulation of cellular process;GO:0007154//cell communication;GO:0065007//biological regulation;GO:0044699//single-organism process;GO:0007165//signal transduction;GO:0051716/…
BnaA01g13980D	29.0133	6.18333	1.09333	0.226667	22.51	2.77	0.97	0.103333	-2.27009	0.00271275	-3.23068	5.64433e-05	BnaA01g13980D [Brassica napus]	-	-	-	-	GO:0044464//cell part;GO:0005622//intracellular;GO:0005623//cell;GO:0043229//intracellular organelle;GO:0043226//organelle;GO:0044424//intracellular part;GO:0043227//membrane-bounded organelle;GO:0043231//intracellular membrane-bounded organelle;GO:0016020//membrane	-	-
BnaA01g13990D	99.3333	32.47	2.82	0.856667	70.4033	30.7633	2.22	0.883333	-1.71889	5.52e-07	-1.32953	0.000411504	BnaA01g13990D [Brassica napus]	Metabolism	Global and Overview;Carbohydrate metabolism	ko01100//Metabolic pathways;ko01110//Biosynthesis of secondary metabolites;ko01130//Biosynthesis of antibiotics;ko01120//Microbial metabolism in diverse environments;ko01200//Carbon metabolism;ko00500//Starch and sucrose metabolism;ko00520//Amino sugar and nucleotide sugar metabolism;ko00010//Glycolysis / Gluconeogenesis;ko00030//Pentose phosphate pathway	K01810	-	GO:0016853//isomerase activity;GO:0004347//glucose-6-phosphate isomerase activity;GO:0016860//intramolecular oxidoreductase activity;GO:0016861//intramolecular oxidoreductase activity, interconverting aldoses and ketoses;GO:0003824//catalytic activity	GO:0006796//phosphate-containing compound metabolic process;GO:0072521//purine-containing compound metabolic process;GO:1901576//organic substance biosynthetic process;GO:0044281//small molecule metabolic process;GO:0006096//glycolytic process;GO:0006090//pyruvate metabolic process;GO:0005996//monosaccharide metabolic process;GO:0006732//coenzyme metabolic process;GO:0019319//hexose biosynthetic …
BnaA01g14000D	67.34	33.96	2.48333	1.14333	58.1367	52.1833	2.37667	1.96	-1.11903	0.00677095	-0.278086	0.554052	BnaA01g14000D [Brassica napus]	-	-	-	-	-	GO:0046872//metal ion binding;GO:0008270//zinc ion binding;GO:0046914//transition metal ion binding;GO:0043167//ion binding;GO:0005488//binding;GO:0043169//cation binding	-
BnaA01g14080D	15.3333	22.3333	0.9	1.22	268	31	18.1267	2.05333	0.438884	0.695709	-3.14207	2.51354e-12	BnaA01g14080D [Brassica napus]	-	-	-	-	GO:0016020//membrane	-	-
BnaA01g14090D	42.3333	20	2.31333	1	55	21.3333	3.32	1.15333	-1.20997	0.00324697	-1.52537	0.00118791	BnaA01g14090D [Brassica napus]	Metabolism	Nucleotide metabolism;Lipid metabolism	ko00230//Purine metabolism;ko00564//Glycerophospholipid metabolism	K01517	GO:0016020//membrane	GO:0016787//hydrolase activity;GO:0003824//catalytic activity	-
BnaA01g14110D	58.4033	12.3033	2.74667	0.52	53.3033	35.2833	2.71	1.63	-2.4011	1.23e-07	-0.733421	0.13888	PREDICTED: protein ABHD17B [Brassica rapa]	-	-	-	-	-	-	-
BnaA01g14120D	632.53	583.04	29.8733	25.1633	1045.74	546.963	54.9033	26.43	-0.247535	0.340967	-1.05472	0.000360544	BnaA01g14120D [Brassica napus]	-	-	-	-	-	GO:0003676//nucleic acid binding;GO:0036094//small molecule binding;GO:0000166//nucleotide binding;GO:1901363//heterocyclic compound binding;GO:0005488//binding;GO:1901265//nucleoside phosphate binding;GO:0097159//organic cyclic compound binding	-
BnaA01g14130D	100.763	6.33333	3.75333	0.213333	128.207	21.6667	5.16667	0.803333	-4.13699	1.23e-16	-2.68516	1.96712e-11	BnaA01g14130D [Brassica napus]	Metabolism	Carbohydrate metabolism	ko00040//Pentose and glucuronate interconversions	K01728	-	-	-
BnaA01g14170D	209.19	469.77	13.93	28.4767	186.407	353.77	13.6967	24.1	1.03159	7.42e-06	0.815208	0.00381273	BnaA01g14170D [Brassica napus]	-	-	-	-	-	GO:0016740//transferase activity;GO:0008168//methyltransferase activity;GO:0003824//catalytic activity;GO:0016741//transferase activity, transferring one-carbon groups	GO:0008152//metabolic process
BnaA01g14190D	187.273	84.6667	6.08	2.50667	211.413	90.3333	7.53333	2.91	-1.2783	3.34e-06	-1.37227	5.50861e-05	BnaA01g14190D [Brassica napus]	Metabolism	Global and Overview;Amino acid metabolism	ko01100//Metabolic pathways;ko01110//Biosynthesis of secondary metabolites;ko01130//Biosynthesis of antibiotics;ko01230//Biosynthesis of amino acids;ko00250//Alanine, aspartate and glutamate metabolism;ko00220//Arginine biosynthesis	K01940	-	GO:0032549//ribonucleoside binding;GO:0043167//ion binding;GO:0017076//purine nucleotide binding;GO:0097367//carbohydrate derivative binding;GO:0032555//purine ribonucleotide binding;GO:0005524//ATP binding;GO:0016874//ligase activity;GO:1901363//heterocyclic compound binding;GO:1901265//nucleoside phosphate binding;GO:0030554//adenyl nucleotide binding;GO:0032559//adenyl ribonucleotide binding;G…	GO:1901607//alpha-amino acid biosynthetic process;GO:0006526//arginine biosynthetic process;GO:0044710//single-organism metabolic process;GO:1901605//alpha-amino acid metabolic process;GO:0044763//single-organism cellular process;GO:0006520//cellular amino acid metabolic process;GO:1901576//organic substance biosynthetic process;GO:1901564//organonitrogen compound metabolic process;GO:0008152//me…
BnaA01g14240D	221.86	426.36	5.81333	10.2267	306.733	151.663	8.94667	4.19333	0.814898	0.00049323	-1.09325	0.00059127	PREDICTED: probable inactive purple acid phosphatase 24 [Brassica rapa]	-	-	-	-	-	GO:0005488//binding;GO:0042578//phosphoric ester hydrolase activity;GO:0016791//phosphatase activity;GO:0003824//catalytic activity;GO:0043167//ion binding;GO:0016787//hydrolase activity;GO:0003993//acid phosphatase activity;GO:0016788//hydrolase activity, acting on ester bonds;GO:0043169//cation binding;GO:0046872//metal ion binding	-
BnaA01g14270D	191.667	178	11.8733	10.08	351.667	151.667	24.45	10.08	-0.236229	0.498375	-1.27834	0.000120752	secE/sec61-gamma protein transport protein [Arabidopsis thaliana]	Genetic Information Processing;Cellular Processes	Folding, sorting and degradation;Transport and catabolism	ko04141//Protein processing in endoplasmic reticulum;ko04145//Phagosome;ko03060//Protein export	K07342	GO:0016020//membrane	GO:0008565//protein transporter activity;GO:0022857//transmembrane transporter activity;GO:0022891//substrate-specific transmembrane transporter activity;GO:0022892//substrate-specific transporter activity;GO:0015450//P-P-bond-hydrolysis-driven protein transmembrane transporter activity;GO:0022804//active transmembrane transporter activity;GO:0015405//P-P-bond-hydrolysis-driven transmembrane tran…	GO:0033554//cellular response to stress;GO:0051707//response to other organism;GO:0033036//macromolecule localization;GO:0051179//localization;GO:0043207//response to external biotic stimulus;GO:0044699//single-organism process;GO:0006886//intracellular protein transport;GO:0046907//intracellular transport;GO:0051649//establishment of localization in cell;GO:0051641//cellular localization;GO:0006…
BnaA01g14300D	335.123	179.463	15.3933	7.54667	269.247	170.897	13.6933	7.99333	-1.02839	1e-05	-0.776605	0.00585609	PREDICTED: SUMO-activating enzyme subunit 1A [Brassica napus]	Genetic Information Processing	Folding, sorting and degradation	ko04120//Ubiquitin mediated proteolysis	K10684	GO:0005623//cell;GO:0043227//membrane-bounded organelle;GO:0043229//intracellular organelle;GO:0043226//organelle;GO:0043231//intracellular membrane-bounded organelle;GO:0005622//intracellular;GO:0044424//intracellular part;GO:0044464//cell part	GO:0016877//ligase activity, forming carbon-sulfur bonds;GO:0097159//organic cyclic compound binding;GO:1901265//nucleoside phosphate binding;GO:0036094//small molecule binding;GO:0008641//small protein activating enzyme activity;GO:0005488//binding;GO:0000166//nucleotide binding;GO:0003824//catalytic activity;GO:1901363//heterocyclic compound binding;GO:0016874//ligase activity	GO:0043170//macromolecule metabolic process;GO:0044237//cellular metabolic process;GO:0019538//protein metabolic process;GO:0071704//organic substance metabolic process;GO:0036211//protein modification process;GO:0044260//cellular macromolecule metabolic process;GO:0043412//macromolecule modification;GO:0008152//metabolic process;GO:0070647//protein modification by small protein conjugation or re…
BnaA01g14320D	5.66667	218.25	0.43	15.1133	7	204.333	0.59	16.3633	5.13534	4.91e-29	4.79361	2.83144e-23	BnaA01g14320D [Brassica napus]	-	-	-	-	GO:0043229//intracellular organelle;GO:0043227//membrane-bounded organelle;GO:0043231//intracellular membrane-bounded organelle;GO:0043226//organelle;GO:0005622//intracellular;GO:0044424//intracellular part;GO:0044464//cell part;GO:0005623//cell	-	GO:1901700//response to oxygen-containing compound;GO:0048367//shoot system development;GO:0009791//post-embryonic development;GO:0032501//multicellular organismal process;GO:0001101//response to acid chemical;GO:0090567//reproductive shoot system development;GO:0010035//response to inorganic substance;GO:0009628//response to abiotic stimulus;GO:0044767//single-organism developmental process;GO:0…
[truncated: 35,814 more rows]
