# Supplementary material for: Characterization of cold stress responses in different rapeseed ecotypes based on metabolomics and transcriptomics analyses
Source: PeerJ. 2020 Mar 31;8:e8704. doi: 10.7717/peerj.8704 (PMC7120054; doi:10.7717/peerj.8704)
Supplement: Supplemental Information 7 [file peerj-08-8704-s007.xlsx]

## Sheet: S5
Table S5 Statistical analysis of DEGs belonging to different transcription factor families in winter and spring B. napus ecotypes after cold stress.
TF families	Up-regulated				Down-regulated				Winter			Spring
	Common	Winter-specific	Spring-specific	Total	Common	Winter-specific	Spring-specific	Total	Down	Up	Total	Down	Up	Total
AP2	3	2	3	8	17	6	1	24	23	5	28	18	6	24
ARF	2	2	2	6	13	7	2	22	20	4	24	15	4	19
ARR-B	1	0	0	1	7	7	3	17	14	1	15	10	1	11
B3	2	4	5	11	21	15	7	43	36	6	42	28	7	35
BBR-BPC	0	1	1	2	9	3	1	13	12	1	13	10	1	11
BES1	0	0	0	0	7	3	4	14	10	0	10	11	0	11
bHLH	11	14	15	40	109	55	39	203	164	25	189	148	26	174
bZIP	18	16	6	40	40	32	12	84	72	34	106	52	24	76
C2H2	11	3	7	21	48	47	16	111	95	14	109	64	18	82
C3H	11	10	3	24	20	13	7	40	33	21	54	27	14	41
CAMTA	2	0	0	2	3	2	4	9	5	2	7	7	2	9
CO-like	11	0	1	12	14	3	1	18	17	11	28	15	12	27
CPP	0	0	1	1	5	3	4	12	8	0	8	9	1	10
DBB	13	5	4	22	2	1	1	4	3	18	21	3	17	20
Dof	23	4	5	32	15	20	10	45	35	27	62	25	28	53
E2F/DP	3	2	3	8	6	1	1	8	7	5	12	7	6	13
EIL	0	0	3	3	1	0	0	1	1	0	1	1	3	4
ERF	41	31	10	82	40	28	27	95	68	72	140	67	51	118
FAR1	0	2	0	2	0	0	1	1	0	2	2	1	0	1
G2-like	5	5	6	16	18	41	3	62	59	10	69	21	11	32
GATA	1	6	4	11	26	17	8	51	43	7	50	34	5	39
GeBP	0	0	2	2	5	3	0	8	8	0	8	5	2	7
GRAS	3	7	3	13	17	8	11	36	25	10	35	28	6	34
GRF	0	3	1	4	7	5	2	14	12	3	15	9	1	10
HB-other	0	0	1	1	3	3	2	8	6	0	6	5	1	6
HB-PHD	0	1	0	1	2	1	0	3	3	1	4	2	0	2
HD-ZIP	12	5	6	23	37	20	7	64	57	17	74	44	18	62
HRT-like	0	0	0	0	2	0	0	2	2	0	2	2	0	2
HSF	9	3	2	14	12	4	5	21	16	12	28	17	11	28
LBD	2	1	0	3	6	8	4	18	14	3	17	10	2	12
LFY	0	1	0	1	0	0	0	0	0	1	1	0	0	0
LSD	0	0	0	0	2	0	0	2	2	0	2	2	0	2
MADS	4	5	7	16	7	11	8	26	18	9	27	15	11	26
MYB	51	17	26	94	92	57	34	183	149	68	217	126	77	203
NAC	9	23	19	51	29	33	22	84	62	32	94	51	28	79
NF-X1	0	0	0	0	0	0	1	1	0	0	0	1	0	1
NF-YA	3	2	4	9	9	4	2	15	13	5	18	11	7	18
NF-YB	0	1	1	2	4	2	2	8	6	1	7	6	1	7
NF-YC	0	0	3	3	5	0	1	6	5	0	5	6	3	9
Nin-like	1	0	2	3	7	10	0	17	17	1	18	7	3	10
RAV	2	3	0	5	0	0	2	2	0	5	5	2	2	4
SBP	1	1	5	7	7	13	1	21	20	2	22	8	6	14
SRS	0	0	0	0	3	5	3	11	8	0	8	6	0	6
STAT	0	0	0	0	0	2	0	2	2	0	2	0	0	0
TALE	3	1	6	10	8	11	2	21	19	4	23	10	9	19
TCP	3	1	4	8	18	13	2	33	31	4	35	20	7	27
Trihelix	8	5	0	13	18	11	7	36	29	13	42	25	8	33
VOZ	0	0	0	0	1	1	0	2	2	0	2	1	0	1
Whirly	0	0	0	0	4	0	0	4	4	0	4	4	0	4
WOX	1	0	1	2	3	0	0	3	3	1	4	3	2	5
WRKY	25	15	7	47	48	20	35	103	68	40	108	83	32	115
YABBY	0	1	0	1	0	5	2	7	5	1	6	2	0	2
ZF-HD	5	1	1	7	16	3	4	23	19	6	25	20	6	26
