# Supplementary material for: Characterization of cold stress responses in different rapeseed ecotypes based on metabolomics and transcriptomics analyses
Source: PeerJ. 2020 Mar 31;8:e8704. doi: 10.7717/peerj.8704 (PMC7120054; doi:10.7717/peerj.8704)
Supplement: Supplemental Information 8 [file peerj-08-8704-s008.xlsx]

## Sheet: S6
Table S6 DEGs belonging to hormone biosynthesis and signal transduction process in winter and spring B. napus ecotypes after cold stress.
Gene ID	28W-vs-4W_log2(FC)	28S-vs-4S_log2(FC)	class	Functions
BnaC08g33680D	-4.99894	-4.10201	ABA biosynthesis	carotenoid cleavage dioxygenase 1 (CCD1)
BnaC01g11550D	-4.46307	-2.36313	ABA biosynthesis	nine-cis-epoxycarotenoid dioxygenase 4 (NCED4)
BnaA01g09900D	-3.64383	-1.88856	ABA biosynthesis	nine-cis-epoxycarotenoid dioxygenase 4 (NCED4)
BnaC08g33690D	-2.77007	-2.47249	ABA biosynthesis	carotenoid cleavage dioxygenase 1 (CCD1)
BnaC05g39200D	-2.50644	-1.64121	ABA biosynthesis	nine-cis-epoxycarotenoid dioxygenase 3 (NCED3)
BnaC04g38650D	-2.03916	-1.20343	ABA biosynthesis	abscisic aldehyde oxidase 3 (AAO3)
BnaA10g14600D	-1.69981	-1.09702	ABA biosynthesis	aldehyde oxidase 1 (AAO1)
BnaA02g05170D	-1.61502	-1.91329	ABA biosynthesis	aldehyde oxidase 1 (AAO1)
BnaC09g36910D	-1.54536	-1.2251	ABA biosynthesis	aldehyde oxidase 1 (AAO1)
BnaA05g25030D	-1.24481	-1.38027	ABA biosynthesis	nine-cis-epoxycarotenoid dioxygenase 3 (NCED3)
BnaA07g12170D	1.05451	1.93911	ABA biosynthesis	ABA DEFICIENT 1 (ABA1)
BnaA06g20180D	1.55381	1.52801	ABA biosynthesis	aldehyde oxidase 2 (AAO2)
BnaC03g54410D	2.134	1.39061	ABA biosynthesis	aldehyde oxidase 2 (AAO2)
BnaA01g29390D	2.23265	1.21436	ABA biosynthesis	nine-cis-epoxycarotenoid dioxygenase 3 (NCED3)
BnaCnng32080D	3.7895	3.67664	ABA biosynthesis	nine-cis-epoxycarotenoid dioxygenase 3 (NCED3)
BnaA03g33390D	5.03877	2.77129	ABA biosynthesis	nine-cis-epoxycarotenoid dioxygenase 3 (NCED3)
BnaA04g15640D	-1.48573	-	ABA biosynthesis	abscisic aldehyde oxidase 3 (AAO3)
BnaA07g39250D	3.45943	-	ABA biosynthesis	nine-cis-epoxycarotenoid dioxygenase 9 (NCED9)
BnaA09g26450D	2.50779	-	ABA biosynthesis	nine-cis-epoxycarotenoid dioxygenase 5 (NCED5)
BnaA09g41150D	-1.74711	-	ABA biosynthesis	carotenoid cleavage dioxygenase 1 (CCD1)
BnaC06g41140D	1.19226	-	ABA biosynthesis	ABA DEFICIENT 2 (ABA2)
BnaA06g01590D	-	-2.20981	ABA biosynthesis	ABA DEFICIENT 2 (ABA2)
BnaA06g19620D	-	-1.35518	ABA biosynthesis	aldehyde oxidase 2 (AAO2)
BnaA09g07610D	-	2.67113	ABA biosynthesis	ABA DEFICIENT 1 (ABA1)
BnaC01g36910D	-	1.38935	ABA biosynthesis	nine-cis-epoxycarotenoid dioxygenase 3 (NCED3)
BnaC06g38870D	-	-3.51442	ABA biosynthesis	nine-cis-epoxycarotenoid dioxygenase 9 (NCED9)
BnaC07g16350D	-	1.52284	ABA biosynthesis	ABA DEFICIENT 1 (ABA1)
BnaC04g56560D	-4.15792	-3.38957	ABA signaling	PYR1-like 4 (PYL4)
BnaA07g38130D	-4.11904	-2.46045	ABA signaling	regulatory component of ABA receptor 1 (RCAR1)
BnaC07g31800D	-2.78339	-2.3632	ABA signaling	SNF1-related protein kinase 2.2 (SNRK2.2)
BnaCnng37890D	-2.69535	-1.9643	ABA signaling	regulatory components of ABA receptor 3 (RCAR3)
BnaC08g11070D	-2.67592	-3.10589	ABA signaling	PYRABACTIN RESISTANCE 1 (PYR1)
BnaC04g56840D	-2.66659	-3.0088	ABA signaling	ENHANCED EM LEVEL (EEL)
BnaC03g02130D	-2.66453	-3.62803	ABA signaling	PYRABACTIN RESISTANCE 1-LIKE 5 (PYL5)
BnaA10g06520D	-2.63318	-3.34314	ABA signaling	regulatory components of ABA receptor 3 (RCAR3)
BnaA03g12450D	-2.5738	-4.82003	ABA signaling	regulatory components of ABA receptor 3 (RCAR3)
BnaC03g21240D	-2.3265	-3.56478	ABA signaling	PYR1-like 4 (PYL4)
BnaA09g36130D	-2.27955	-1.02857	ABA signaling	ABA-responsive element binding protein 3 (AREB3)
BnaAnng40650D	-2.23563	-3.88349	ABA signaling	PYRABACTIN RESISTANCE 1-LIKE 5 (PYL5)
BnaA03g40850D	-2.06503	-2.90638	ABA signaling	SNF1-related protein kinase 2.2 (SNRK2.2)
BnaA01g23120D	-2.02503	-2.91076	ABA signaling	SNF1-related protein kinase 2.10 (SNRK2.10)
BnaA03g17720D	-2.00349	-3.30626	ABA signaling	PYR1-like 4 (PYL4)
BnaA02g10420D	-1.96055	-1.03613	ABA signaling	regulatory components of ABA receptor 3 (RCAR3)
BnaC02g14540D	-1.94327	-2.39678	ABA signaling	regulatory components of ABA receptor 3 (RCAR3)
BnaA04g23690D	-1.84997	-1.85316	ABA signaling	ENHANCED EM LEVEL (EEL)
BnaC05g02200D	-1.67486	-1.62221	ABA signaling	G-box binding factor 4 (GBF4)
BnaCnng65400D	-1.65001	-1.13983	ABA signaling	PYRABACTIN RESISTANCE 1 (PYR1)
BnaC03g22610D	-1.61581	-2.04793	ABA signaling	PYR1-like 6 (PYL6)
BnaC01g28850D	-1.3387	-1.80163	ABA signaling	SNF1-related protein kinase 2.10 (SNRK2.10)
BnaA03g43410D	-1.09472	-1.21139	ABA signaling	PYRABACTIN RESISTANCE 1 (PYR1)
BnaC07g44670D	1.24189	1.38238	ABA signaling	abscisic acid responsive elements-binding factor 3 (ABF3)
BnaA10g00540D	1.62826	2.69041	ABA signaling	regulatory component of ABA receptor 1 (RCAR1)
BnaA10g12140D	1.79515	1.78235	ABA signaling	highly ABA-induced PP2C gene 1 (HAI1)
BnaA04g29300D	1.83586	2.44574	ABA signaling	PYR1-like 6 (PYL6)
BnaAnng26550D	1.97021	2.30141	ABA signaling	abscisic acid responsive elements-binding factor 3 (ABF3)
BnaC04g47050D	2.01808	2.29258	ABA signaling	PYR1-like 6 (PYL6)
BnaC09g34350D	2.47626	2.86135	ABA signaling	highly ABA-induced PP2C gene 1 (HAI1)
BnaC06g02640D	2.68432	2.15394	ABA signaling	abscisic acid responsive element-binding factor 1 (ABF1)
BnaC04g09030D	2.72882	1.8635	ABA signaling	ABA INSENSITIVE 5 (ABI5)
BnaA10g04840D	3.94055	2.22569	ABA signaling	highly ABA-induced PP2C gene 2 (HAI2)
BnaC01g00890D	3.96669	3.0155	ABA signaling	SNF1-related protein kinase 2.7 (SNRK2.7)
BnaC04g04830D	4.02046	4.76457	ABA signaling	PYR1-like 6 (PYL6)
BnaAnng26730D	4.10139	3.15185	ABA signaling	SNF1-related protein kinase 2.7 (SNRK2.7)
BnaA01g34560D	4.23714	3.33462	ABA signaling	SNF1-related protein kinase 2.7 (SNRK2.7)
BnaA09g49440D	4.50289	2.09	ABA signaling	highly ABA-induced PP2C gene 2 (HAI2)
BnaC03g50700D	5.26388	4.67221	ABA signaling	SNF1-related protein kinase 2.5 (SNRK2.5)
BnaC05g05180D	5.31041	3.42647	ABA signaling	highly ABA-induced PP2C gene 2 (HAI2)
BnaA06g22800D	8.58358	9.12864	ABA signaling	SNF1-related protein kinase 2.5 (SNRK2.5)
BnaCnng68710D	9.76487	9.44432	ABA signaling	PYR1-like 10 (PYL10)
BnaA04g21960D	-2.30636	-	ABA signaling	PYR1-like 4 (PYL4)
BnaA05g05420D	5.53916	-	ABA signaling	PYR1-like 6 (PYL6)
BnaA05g08020D	3.06014	-	ABA signaling	ABA INSENSITIVE 5 (ABI5)
BnaA05g12650D	7.02237	-	ABA signaling	highly ABA-induced PP2C gene 3 (HAI3)
BnaA07g20630D	1.29582	-	ABA signaling	Protein kinase superfamily protein
BnaA08g08460D	-1.88452	-	ABA signaling	PYRABACTIN RESISTANCE 1 (PYR1)
BnaA10g28780D	-1.17423	-	ABA signaling	abscisic acid responsive elements-binding factor 2 (ABF2)
BnaC04g17630D	4.47573	-	ABA signaling	Basic-leucine zipper (bZIP) transcription factor family protein
BnaC05g13670D	-1.29733	-	ABA signaling	homology to ABI2 (HAB2)
BnaC06g00420D	-1.06195	-	ABA signaling	abscisic acid responsive elements-binding factor 2 (ABF2)
BnaC06g17940D	-2.34827	-	ABA signaling	regulatory component of ABA receptor 1 (RCAR1)
BnaC07g34880D	-1.10233	-	ABA signaling	PYRABACTIN RESISTANCE 1 (PYR1)
BnaA01g15250D	-	1.70381	ABA signaling	ABA INSENSITIVE 1 (ABI1)
BnaA07g16990D	-	-3.92057	ABA signaling	ABA-responsive element binding protein 3 (AREB3)
BnaA07g30430D	-	1.0649	ABA signaling	homology to ABI1 (HAB1)
BnaA08g14490D	-	1.05131	ABA signaling	ABA INSENSITIVE 1 (ABI1)
BnaA08g25520D	-	-1.14038	ABA signaling	Protein kinase superfamily protein
BnaC01g04370D	-	1.97933	ABA signaling	OPEN STOMATA 1 (OST1)
BnaC01g18020D	-	1.96046	ABA signaling	ABA INSENSITIVE 1 (ABI1)
BnaC03g15210D	-	-2.11798	ABA signaling	regulatory components of ABA receptor 3 (RCAR3)
BnaC03g31730D	-	-1.61487	ABA signaling	PYR1-like 7 (PYL7)
BnaC04g24820D	-	-1.66635	ABA signaling	ABA-responsive element binding protein 3 (AREB3)
BnaC06g33910D	-	1.373	ABA signaling	homology to ABI1 (HAB1)
BnaC06g38790D	-	-7.61961	ABA signaling	Protein kinase superfamily protein
BnaCnng20400D	-	-7.71425	ABA signaling	ABA-responsive element binding protein 3 (AREB3)
BnaA04g12790D	-11.2046	-4.60175	Auxin biosynthesis	cytochrome P450, family 79, subfamily B, polypeptide 3 (CYP79B3)
BnaC08g13170D	-4.16993	-8.88671	Auxin biosynthesis	YUCCA 8 (YUC8)
BnaA09g04510D	-3.96963	-2.45519	Auxin biosynthesis	YUCCA6 (YUC6)
BnaC07g51280D	-3.57167	-3.61111	Auxin biosynthesis	cytochrome P450, family 79, subfamily B, polypeptide 2 (CYP79B2)
BnaA01g34610D	-3.37748	-1.21092	Auxin biosynthesis	cytochrome P450, family 79, subfamily B, polypeptide 2 (CYP79B2)
BnaC01g00800D	-3.31288	-2.55637	Auxin biosynthesis	cytochrome P450, family 79, subfamily B, polypeptide 2 (CYP79B2)
BnaA02g14990D	-1.14616	-1.06802	Auxin biosynthesis	tryptophan aminotransferase of Arabidopsis 1 (TAA1)
BnaA02g31890D	-2.15628	-	Auxin biosynthesis	YUCCA6 (YUC6)
BnaA06g39380D	-2.14136	-	Auxin biosynthesis	YUCCA6 (YUC6)
BnaC01g09750D	1.71397	-	Auxin biosynthesis	YUCCA 8 (YUC8)
BnaC02g48550D	-3.63807	-	Auxin biosynthesis	YUCCA6 (YUC6)
BnaC07g29140D	-1.82212	-	Auxin biosynthesis	YUCCA6 (YUC6)
BnaC09g03930D	-8.04075	-	Auxin biosynthesis	YUCCA6 (YUC6)
BnaA08g16100D	-	-1.85325	Auxin biosynthesis	cytochrome P450, family 79, subfamily B, polypeptide 2 (CYP79B2)
BnaA09g50630D	-	7.54432	Auxin biosynthesis	YUCCA 9 (YUC9)
BnaAnng41850D	-	-3.92057	Auxin biosynthesis	YUCCA 8 (YUC8)
BnaC03g60820D	-	-1.75693	Auxin biosynthesis	cytochrome P450, family 79, subfamily B, polypeptide 2 (CYP79B2)
BnaA09g42140D	-7.78136	-8.45121	Auxin signaling	GH3.3
BnaCnng28110D	-6.82116	-6.73286	Auxin signaling	Auxin-responsive GH3 family protein
BnaC07g47550D	-6.18735	-4.40766	Auxin signaling	SAUR-like auxin-responsive protein family
BnaA06g06420D	-4.69779	-5.04012	Auxin signaling	Auxin-responsive GH3 family protein
BnaC04g22040D	-4.4431	-1.73252	Auxin signaling	SAUR-like auxin-responsive protein family
BnaC03g05810D	-4.42626	-4.07895	Auxin signaling	AVRPPHB SUSCEPTIBLE 3 (PBS3)
BnaC02g47310D	-4.19438	-2.51658	Auxin signaling	indole-3-acetic acid inducible 9 (IAA9)
BnaC01g03670D	-4.12623	-2.68839	Auxin signaling	SAUR-like auxin-responsive protein family
BnaC06g02210D	-3.91146	-4.87699	Auxin signaling	Auxin-responsive GH3 family protein
BnaA09g07160D	-3.83164	-2.03223	Auxin signaling	indole-3-acetic acid inducible 9 (IAA9)
BnaA06g03570D	-3.79533	-3.21072	Auxin signaling	Auxin-responsive GH3 family protein
BnaAnng30780D	-3.79518	-4.08746	Auxin signaling	AUXIN RESISTANT 1 (AUX1)
BnaA05g06540D	-3.77938	-3.44812	Auxin signaling	AUXIN RESISTANT 1 (AUX1)
BnaC04g07210D	-3.51003	-3.51372	Auxin signaling	AUXIN RESISTANT 1 (AUX1)
BnaC03g21070D	-3.5008	-3.45494	Auxin signaling	AUXIN RESISTANT 1 (AUX1)
BnaA06g37300D	-3.48182	-1.84194	Auxin signaling	SAUR-like auxin-responsive protein family
BnaC02g34510D	-3.24548	-4.32912	Auxin signaling	SAUR-like auxin-responsive protein family
BnaC06g20740D	-3.23889	-2.89662	Auxin signaling	like AUX1 3 (LAX3)
BnaA02g18200D	-3.20163	-3.24793	Auxin signaling	like AUX1 3 (LAX3)
BnaC04g11220D	-3.15732	-2.00369	Auxin signaling	auxin-induced protein 13 (IAA13)
BnaA07g20880D	-3.12276	-2.26849	Auxin signaling	like AUX1 3 (LAX3)
BnaA04g21830D	-3.07679	-3.11778	Auxin signaling	AUXIN RESISTANT 1 (AUX1)
BnaAnng12210D	-3.02237	-5.30581	Auxin signaling	indole-3-acetic acid inducible 12 (IAA12)
BnaCnng60850D	-2.99647	-1.88452	Auxin signaling	TRANSPORT INHIBITOR RESPONSE 1 (TIR1)
BnaA05g10300D	-2.83694	-1.82405	Auxin signaling	auxin-induced protein 13 (IAA13)
BnaAnng24400D	-2.77259	-4.15313	Auxin signaling	SAUR-like auxin-responsive protein family
BnaA03g17600D	-2.66297	-2.52356	Auxin signaling	AUXIN RESISTANT 1 (AUX1)
BnaC04g45700D	-2.64715	-2.26472	Auxin signaling	AUXIN RESISTANT 1 (AUX1)
BnaA10g19970D	-2.56064	-1.95985	Auxin signaling	AVRPPHB SUSCEPTIBLE 3 (PBS3)
BnaC08g50150D	-2.49061	-6.31061	Auxin signaling	indole-3-acetic acid inducible 12 (IAA12)
BnaA09g48110D	-2.40808	-3.80735	Auxin signaling	Auxin-responsive GH3 family protein
BnaCnng03900D	-2.37524	-3.97018	Auxin signaling	like AUXIN RESISTANT 1 (LAX1)
BnaA10g27610D	-2.33813	-2.52321	Auxin signaling	like AUXIN RESISTANT 1 (LAX1)
BnaA04g00230D	-2.33298	-1.10992	Auxin signaling	TRANSPORT INHIBITOR RESPONSE 1 (TIR1)
BnaC09g43750D	-2.28719	-2.94359	Auxin signaling	AVRPPHB SUSCEPTIBLE 3 (PBS3)
BnaA09g43460D	-2.18658	-2.35199	Auxin signaling	like AUXIN RESISTANT 2 (LAX2)
BnaC04g00140D	-2.17509	-3.19265	Auxin signaling	putative indole-3-acetic acid-amido synthetase GH3.9 (GH3.9)
BnaC07g51040D	-2.11741	-3.76184	Auxin signaling	Auxin-responsive GH3 family protein
BnaC06g43000D	-2.0145	-2.57491	Auxin signaling	TRANSPORT INHIBITOR RESPONSE 1 (TIR1)
BnaA03g23150D	-2.01398	-2.00978	Auxin signaling	like AUXIN RESISTANT 2 (LAX2)
BnaA03g52610D	-1.99377	-4.56478	Auxin signaling	Auxin-responsive GH3 family protein
BnaA03g18790D	-1.79442	-2.10893	Auxin signaling	AUXIN RESISTANT 1 (AUX1)
BnaCnng74340D	-1.62075	-3.02801	Auxin signaling	like AUXIN RESISTANT 2 (LAX2)
BnaC03g39670D	-1.60771	-1.0403	Auxin signaling	phytochrome-associated protein 1 (PAP1)
BnaA03g36950D	-1.27921	-1.23878	Auxin signaling	indole-3-acetic acid 7 (IAA7)
BnaCnng13150D	-1.16892	-1.11873	Auxin signaling	indole-3-acetic acid inducible 9 (IAA9)
BnaAnng10570D	-1.15879	-2.39852	Auxin signaling	indoleacetic acid-induced protein 16 (IAA16)
BnaA08g31250D	-1.152	-1.64669	Auxin signaling	MONOPTEROS (MP)
BnaA06g24570D	-1.14585	-1.08073	Auxin signaling	indole-3-acetic acid inducible 9 (IAA9)
BnaC03g30320D	-1.12216	1.63303	Auxin signaling	auxin-responsive GH3 family protein
BnaA04g13090D	-1.11072	-1.71097	Auxin signaling	indoleacetic acid-induced protein 8 (IAA8)
BnaA10g02680D	-1.02078	-3.02073	Auxin signaling	indole-3-acetic acid inducible 12 (IAA12)
BnaA06g02010D	1.08879	1.0471	Auxin signaling	indole-3-acetic acid inducible 18 (IAA18)
BnaA08g01770D	1.12141	1.50493	Auxin signaling	indole-3-acetic acid inducible 18 (IAA18)
BnaA05g23300D	1.59794	1.90573	Auxin signaling	phytochrome-associated protein 1 (PAP1)
BnaA10g02490D	1.73016	1.86697	Auxin signaling	SHORT HYPOCOTYL 2 (SHY2)
BnaC01g36030D	1.73905	1.27347	Auxin signaling	indole-3-acetic acid inducible 19 (IAA19)
BnaC09g29950D	1.80885	1.20912	Auxin signaling	SAUR-like auxin-responsive protein family
BnaA08g30190D	1.85408	2.49105	Auxin signaling	indole-3-acetic acid inducible 2 (IAA2)
BnaA01g33420D	2.52769	1.73997	Auxin signaling	indoleacetic acid-induced protein 16 (IAA16)
BnaC02g44790D	2.69056	1.46615	Auxin signaling	SAUR-like auxin-responsive protein family
BnaC01g39910D	2.77048	4.05804	Auxin signaling	indoleacetic acid-induced protein 16 (IAA16)
BnaA09g50600D	2.93561	3.86206	Auxin signaling	SHORT HYPOCOTYL 2 (SHY2)
BnaC08g43820D	3.05178	2.82389	Auxin signaling	SHORT HYPOCOTYL 2 (SHY2)
BnaC09g00690D	3.35432	-2.34534	Auxin signaling	DWARF IN LIGHT 2 (DFL2)
BnaA02g10190D	3.59096	11.2328	Auxin signaling	SAUR-like auxin-responsive protein family
BnaA09g39680D	3.77259	-1.90397	Auxin signaling	indole-3-acetic acid inducible 30 (IAA30)
BnaC01g43640D	9.85071	-9.57617	Auxin signaling	indole-3-acetic acid 7 (IAA7)
BnaA01g08280D	-1.44001	-	Auxin signaling	indole-3-acetic acid inducible 11 (IAA11)
BnaA01g28670D	1.67308	-	Auxin signaling	indole-3-acetic acid inducible 19 (IAA19)
BnaA03g04300D	1.40964	-	Auxin signaling	Auxin-responsive GH3 family protein
BnaA03g06810D	-3.79941	-	Auxin signaling	SAUR-like auxin-responsive protein family
BnaA03g36940D	1.3014	-	Auxin signaling	indole-3-acetic acid inducible 2 (IAA2)
BnaA03g48550D	3.3514	-	Auxin signaling	WES1
BnaA03g58910D	-1.31197	-	Auxin signaling	indole-3-acetic acid inducible 11 (IAA11)
BnaA04g01170D	-3.30341	-	Auxin signaling	SAUR-like auxin-responsive protein family
BnaA05g01170D	-1.29379	-	Auxin signaling	SAUR-like auxin-responsive protein family
BnaA05g07390D	-8.47843	-	Auxin signaling	SAUR-like auxin-responsive protein family
BnaA06g14040D	-1.69313	-	Auxin signaling	MONOPTEROS (MP)
BnaA06g27950D	-2.14892	-	Auxin signaling	indole-3-acetic acid inducible 28 (IAA28)
BnaA06g37320D	-2.25763	-	Auxin signaling	SAUR-like auxin-responsive protein family
BnaA08g27770D	1.16957	-	Auxin signaling	AUXIN RESISTANT 3 (AXR3)
BnaA09g04430D	-1.52991	-	Auxin signaling	indole-3-acetic acid inducible 28 (IAA28)
BnaA09g40340D	-1.4669	-	Auxin signaling	TRANSPORT INHIBITOR RESPONSE 1 (TIR1)
BnaA10g06890D	1.01614	-	Auxin signaling	SAUR-like auxin-responsive protein family
BnaC01g01570D	2.75582	-	Auxin signaling	BRU6
BnaC01g03680D	1.2351	-	Auxin signaling	SAUR-like auxin-responsive protein family
BnaC03g05830D	1.19625	-	Auxin signaling	Auxin-responsive GH3 family protein
BnaC03g39170D	1.55252	-	Auxin signaling	indole-3-acetic acid inducible 19 (IAA19)
BnaC03g43120D	1.45658	-	Auxin signaling	indole-3-acetic acid inducible 2 (IAA2)
BnaC04g18710D	-1.70402	-	Auxin signaling	auxin response factor 1 (ARF1)
BnaC05g36730D	1.32956	-	Auxin signaling	phytochrome-associated protein 1 (PAP1)
BnaC05g47100D	-1.79997	-	Auxin signaling	indoleacetic acid-induced protein 16 (IAA16)
BnaC06g18310D	-1.82947	-	Auxin signaling	indole-3-acetic acid inducible 30 (IAA30)
BnaC06g40600D	3.45943	-	Auxin signaling	indole-3-acetic acid inducible 15 (IAA15)
BnaC07g28990D	-1.86173	-	Auxin signaling	indole-3-acetic acid inducible 28 (IAA28)
BnaC07g40810D	2.54611	-	Auxin signaling	WES1
BnaC07g44350D	-6.05889	-	Auxin signaling	Auxin-responsive GH3 family protein
BnaC07g45220D	-2.67807	-	Auxin signaling	SAUR-like auxin-responsive protein family
BnaC07g47570D	-2.47458	-	Auxin signaling	SAUR-like auxin-responsive protein family
BnaC07g48490D	-1.48017	-	Auxin signaling	MONOPTEROS (MP)
BnaC08g19040D	-1.30933	-	Auxin signaling	MONOPTEROS (MP)
BnaC08g36050D	-2.72792	-	Auxin signaling	like AUXIN RESISTANT 2 (LAX2)
BnaC08g47390D	-1.54528	-	Auxin signaling	indole-3-acetic acid inducible 14 (IAA14)
BnaC09g39790D	-1.75607	-	Auxin signaling	SAUR-like auxin-responsive protein family
BnaCnng63120D	-1.7786	-	Auxin signaling	SAUR-like auxin-responsive protein family
BnaCnng72960D	1.72978	-	Auxin signaling	SAUR-like auxin-responsive protein family
BnaA01g00580D	-	-4.47805	Auxin signaling	BRU6
BnaA01g02410D	-	-9.06788	Auxin signaling	SAUR-like auxin-responsive protein family
BnaA01g02420D	-	-2.87072	Auxin signaling	SAUR-like auxin-responsive protein family
BnaA01g12340D	-	-2.50826	Auxin signaling	SAUR-like auxin-responsive protein family
BnaA01g16300D	-	-3.17745	Auxin signaling	WES1
BnaA01g27770D	-	2.38191	Auxin signaling	phytochrome-associated protein 1 (PAP1)
BnaA02g01560D	-	-1.20498	Auxin signaling	AVRPPHB SUSCEPTIBLE 3 (PBS3)
BnaA02g05090D	-	3.31342	Auxin signaling	SAUR-like auxin-responsive protein family
BnaA03g04280D	-	-2.48938	Auxin signaling	AVRPPHB SUSCEPTIBLE 3 (PBS3)
BnaA03g06880D	-	-2.70328	Auxin signaling	SAUR-like auxin-responsive protein family
BnaA03g45460D	-	-6.09276	Auxin signaling	SAUR-like auxin-responsive protein family
BnaA03g53040D	-	-3.9542	Auxin signaling	SAUR-like auxin-responsive protein family
BnaA04g27430D	-	3.66742	Auxin signaling	indole-3-acetic acid inducible 30 (IAA30)
BnaA05g00250D	-	-3.19794	Auxin signaling	putative indole-3-acetic acid-amido synthetase GH3.9 (GH3.9)
BnaA05g16680D	-	-1.61286	Auxin signaling	indole-3-acetic acid 7 (IAA7)
BnaA05g26360D	-	1.87409	Auxin signaling	SAUR-like auxin-responsive protein family
BnaA06g03560D	-	-9.52487	Auxin signaling	Auxin-responsive GH3 family protein
BnaA06g06390D	-	-7.09452	Auxin signaling	Auxin-responsive GH3 family protein
BnaA06g06400D	-	-4.24793	Auxin signaling	Auxin-responsive GH3 family protein
BnaA07g11660D	-	-1.5656	Auxin signaling	MONOPTEROS (MP)
BnaA08g10360D	-	-9.86109	Auxin signaling	SAUR-like auxin-responsive protein family
BnaA09g38680D	-	1.5787	Auxin signaling	SAUR-like auxin-responsive protein family
BnaA09g39470D	-	1.57285	Auxin signaling	SAUR-like auxin-responsive protein family
BnaA09g50590D	-	1.26329	Auxin signaling	AUXIN RESISTANT 3 (AXR3)
BnaA09g56290D	-	2.80367	Auxin signaling	SAUR-like auxin-responsive protein family
BnaA10g14760D	-	1.14497	Auxin signaling	NON-PHOTOTROPHIC HYPOCOTYL (NPH4)
BnaA10g16770D	-	-8.79225	Auxin signaling	SAUR-like auxin-responsive protein family
BnaC01g19430D	-	-2.64211	Auxin signaling	WES1
BnaC01g44160D	-	2.43063	Auxin signaling	phytochrome-associated protein 1 (PAP1)
BnaC02g07740D	-	-1.30683	Auxin signaling	SAUR-like auxin-responsive protein family
BnaC02g07780D	-	-3.926	Auxin signaling	SAUR-like auxin-responsive protein family
BnaC02g18220D	-	-7.82443	Auxin signaling	isopentenyltransferase 1 (IPT1)
BnaC02g23710D	-	3.80959	Auxin signaling	SAUR-like auxin-responsive protein family
BnaC03g46960D	-	2.22894	Auxin signaling	SAUR-like auxin-responsive protein family
BnaC04g00740D	-	1.67265	Auxin signaling	SAUR-like auxin-responsive protein family
BnaC06g09250D	-	2.21484	Auxin signaling	indole-3-acetic acid inducible 18 (IAA18)
BnaC07g16810D	-	-1.07592	Auxin signaling	indole-3-acetic acid 7 (IAA7)
BnaC08g11390D	-	-2.04182	Auxin signaling	SAUR-like auxin-responsive protein family
BnaC08g30850D	-	1.18771	Auxin signaling	SAUR-like auxin-responsive protein family
BnaC08g31820D	-	2.63893	Auxin signaling	SAUR-like auxin-responsive protein family
BnaC08g38350D	-	2.65912	Auxin signaling	SAUR-like auxin-responsive protein family
BnaC09g37130D	-	1.03534	Auxin signaling	NON-PHOTOTROPHIC HYPOCOTYL (NPH4)
BnaC09g39850D	-	-2.56737	Auxin signaling	SAUR-like auxin-responsive protein family
BnaCnng22400D	-	-4.20945	Auxin signaling	GH3.1
BnaCnng23650D	-	1.57785	Auxin signaling	SAUR-like auxin-responsive protein family
BnaCnng39150D	-	-3.10852	Auxin signaling	DWARF IN LIGHT 1 (DFL1)
BnaCnng49810D	-	-6.90689	Auxin signaling	auxin-responsive GH3 family protein
BnaCnng49820D	-	-7.05889	Auxin signaling	auxin-responsive GH3 family protein
BnaCnng57860D	-	-2.19103	Auxin signaling	indole-3-acetic acid inducible 9 (IAA9)
BnaC07g27880D	-7.82443	-4.42626	CK signaling	response regulator 9 (ARR9)
BnaA07g22010D	-5.32123	-6.74305	CK signaling	response regulator 15 (ARR15)
BnaA09g48160D	-4.88427	-1.16861	CK signaling	response regulator 4 (ARR4)
BnaC01g06500D	-3.93289	-3.35563	CK signaling	response regulator 10 (RR10)
BnaA04g07540D	-3.69201	-3.33582	CK signaling	histidine kinase 2 (HK2)
BnaC03g48210D	-3.23845	-2.84084	CK signaling	response regulator 4 (ARR4)
BnaC04g29780D	-3.12066	-2.42091	CK signaling	histidine kinase 2 (HK2)
BnaA03g51830D	-2.90838	-2.14292	CK signaling	response regulator 10 (RR10)
BnaA03g19150D	-2.88753	2.67243	CK signaling	response regulator 16 (RR16)
BnaA09g02590D	-2.77965	-1.5693	CK signaling	histidine-containing phosphotransmitter 2 (AHP2)
BnaC07g43590D	-2.73663	-2.60186	CK signaling	response regulator 10 (RR10)
BnaC05g36490D	-2.04994	-1.52641	CK signaling	response regulator 1 (RR1)
BnaC04g24580D	-1.96578	-1.16911	CK signaling	response regulator 9 (ARR9)
BnaA10g01920D	-1.51129	-1.87447	CK signaling	histidine-containing phosphotransfer factor 5 (AHP5)
BnaC05g14720D	1.61953	1.55154	CK signaling	response regulator 7 (ARR7)
BnaA03g42350D	2.81194	4.67181	CK signaling	response regulator 2 (RR2)
BnaA01g25020D	1.04679	-	CK signaling	histidine-containing phosphotransmitter 1 (AHP1)
BnaA03g34320D	-1.09007	-	CK signaling	response regulator 1 (RR1)
BnaA05g23050D	-1.24288	-	CK signaling	response regulator 1 (RR1)
BnaA05g36880D	-1.82018	-	CK signaling	HPT phosphotransmitter 4 (AHP4)
BnaA06g30870D	-1.26817	-	CK signaling	histidine-containing phosphotransmitter 2 (AHP2)
BnaA07g08880D	-1.52712	-	CK signaling	histidine kinase 3 (HK3)
BnaA07g24890D	-2.24046	-	CK signaling	response regulator 11 (ARR11)
BnaA08g22240D	-1.5704	-	CK signaling	response regulator 7 (ARR7)
BnaA08g25770D	-2.29445	-	CK signaling	response regulator 4 (ARR4)
BnaC03g22790D	-10.0362	-	CK signaling	response regulator 16 (RR16)
BnaC03g39610D	-1.20485	-	CK signaling	HPT phosphotransmitter 4 (AHP4)
BnaC05g36960D	-1.59082	-	CK signaling	HPT phosphotransmitter 4 (AHP4)
BnaC06g28780D	-2.30933	-	CK signaling	response regulator 11 (ARR11)
BnaC07g21260D	2.90689	-	CK signaling	WOODEN LEG (WOL)
BnaC07g33430D	-1.15862	-	CK signaling	response regulator 2 (RR2)
BnaC08g14280D	-2.09105	-	CK signaling	response regulator 4 (ARR4)
BnaC08g18570D	-1.23615	-	CK signaling	response regulator 7 (ARR7)
BnaC08g27970D	-2.47508	-	CK signaling	response regulator 9 (ARR9)
BnaA02g07870D	-	-3.64386	CK signaling	response regulator 18 (RR18)
BnaA03g34150D	-	1.81589	CK signaling	HPT phosphotransmitter 4 (AHP4)
BnaA06g20760D	-	-8.45121	CK signaling	response regulator 5 (RR5)
BnaC01g42890D	-	-1.46151	CK signaling	response regulator 5 (RR5)
BnaC03g39750D	-	-1.07533	CK signaling	response regulator 1 (RR1)
BnaC06g22740D	-	-4.40312	CK signaling	response regulator 15 (ARR15)
BnaC09g02050D	-	-2.28612	CK signaling	histidine-containing phosphotransmitter 2 (AHP2)
BnaCnng27490D	-	-1.56655	CK signaling	response regulator 1 (RR1)
BnaC03g28000D	-8.72565	-8.24476	ET biosynthesis	1-aminocyclopropane-1-carboxylate synthase 11 (ACS11)
BnaAnng12450D	-4.1607	-2.32752	ET biosynthesis	ethylene-forming enzyme (EFE)
BnaA09g21860D	-2.66294	-2.61586	ET biosynthesis	1-aminocyclopropane-1-carboxylic acid (acc) synthase 6 (ACS6)
BnaC09g24050D	-1.92262	-2.3017	ET biosynthesis	1-aminocyclopropane-1-carboxylic acid (acc) synthase 6 (ACS6)
BnaC09g13570D	-1.45847	-1.40505	ET biosynthesis	ACC oxidase 2 (ACO2)
BnaC01g01270D	1.03485	1.7337	ET biosynthesis	1-amino-cyclopropane-1-carboxylate synthase 8 (ACS8)
BnaA07g33490D	1.05538	1.73996	ET biosynthesis	2-oxoglutarate (2OG) and Fe(II)-dependent oxygenase superfamily protein
BnaC04g08360D	1.54686	1.95345	ET biosynthesis	methionine adenosyltransferase 3 (MAT3)
BnaA05g07530D	1.58978	2.06738	ET biosynthesis	methionine adenosyltransferase 3 (MAT3)
BnaA03g34510D	2.15252	1.4389	ET biosynthesis	METHIONINE OVER-ACCUMULATOR 3 (MTO3)
BnaCnng16700D	2.25792	2.07637	ET biosynthesis	METHIONINE OVER-ACCUMULATOR 3 (MTO3)
BnaC03g39970D	3.2398	1.74876	ET biosynthesis	METHIONINE OVER-ACCUMULATOR 3 (MTO3)
BnaC05g00530D	3.45943	5.87036	ET biosynthesis	1-amino-cyclopropane-1-carboxylate synthase 2 (ACS2)
BnaC04g35390D	3.62244	3.07724	ET biosynthesis	1-aminocyclopropane-1-carboxylate synthase 4 (ACS4)
BnaA01g36920D	4.18935	3.85555	ET biosynthesis	METHIONINE OVER-ACCUMULATOR 3 (MTO3)
BnaA10g00470D	10.3663	4.56104	ET biosynthesis	1-amino-cyclopropane-1-carboxylate synthase 2 (ACS2)
BnaA03g60430D	-1.6396	-	ET biosynthesis	ACC oxidase 2 (ACO2)
BnaA04g13310D	1.37851	-	ET biosynthesis	1-aminocyclopropane-1-carboxylate synthase 4 (ACS4)
BnaA01g00270D	-	-3.21904	ET biosynthesis	1-amino-cyclopropane-1-carboxylate synthase 8 (ACS8)
BnaA03g23600D	-	-3.41093	ET biosynthesis	1-aminocyclopropane-1-carboxylate synthase 11 (ACS11)
BnaAnng30490D	-	-7.49185	ET biosynthesis	1-amino-cyclopropane-1-carboxylate synthase 8 (ACS8)
BnaCnng67880D	-	-3.23095	ET biosynthesis	ACC oxidase 1 (ACO1)
BnaCnng75920D	-	-1.90782	ET biosynthesis	S-adenosylmethionine synthetase 2 (SAM-2)
BnaAnng07060D	-11.4902	-8.09377	ET signaling	ethylene responsive element binding factor 2 (ERF2)
BnaC09g20090D	-5.48661	-6.15016	ET signaling	ethylene responsive element binding factor 2 (ERF2)
BnaA06g35500D	-5.44962	-5.18183	ET signaling	ethylene responsive element binding factor 2 (ERF2)
BnaC07g20040D	-4.91223	-6.54143	ET signaling	ethylene responsive element binding factor 2 (ERF2)
BnaA02g25110D	-2.99627	-5.47768	ET signaling	ethylene responsive element binding factor 2 (ERF2)
BnaCnng60520D	-2.82543	-4.83964	ET signaling	ethylene responsive element binding factor 2 (ERF2)
BnaC03g26570D	-1.26998	-1.72299	ET signaling	ETHYLENE-INSENSITIVE3-like 1 (EIL1)
BnaC09g04050D	1.37422	1.41003	ET signaling	EIN3-binding F box protein 2 (EBF2)
BnaA05g00430D	-1.07039	-	ET signaling	ethylene response sensor 1 (ERS1)
BnaA06g27640D	1.21872	-	ET signaling	EIN3-binding F box protein 2 (EBF2)
BnaC01g40040D	-1.0077	-	ET signaling	ETHYLENE INSENSITIVE 4 (EIN4)
BnaC08g00620D	-2.18903	-	ET signaling	ethylene response sensor 2 (ERS2)
BnaCnng68360D	2.17425	-	ET signaling	ethylene response 2 (ETR2)
BnaA01g33540D	-	-1.77511	ET signaling	ETHYLENE INSENSITIVE 4 (EIN4)
BnaA07g39030D	-	1.10895	ET signaling	ETHYLENE-INSENSITIVE3-like 3 (EIL3)
BnaC03g01380D	-	-1.27318	ET signaling	CONSTITUTIVE TRIPLE RESPONSE 1 (CTR1)
BnaC06g23450D	-	1.23447	ET signaling	ETHYLENE-INSENSITIVE3-like 3 (EIL3)
BnaC06g34570D	-	1.3765	ET signaling	ETHYLENE-INSENSITIVE3-like 3 (EIL3)
BnaA03g55500D	-8.09452	-7.09452	GA Biosynthesis	gibberellin 20-oxidase 3 (GA20OX3)
BnaAnng01990D	-4.61143	-1.86645	GA Biosynthesis	gibberellin 20-oxidase 3 (GA20OX3)
BnaA07g34940D	-2.77921	-1.2787	GA Biosynthesis	GA REQUIRING 2 (GA2)
BnaA05g10890D	-2.73932	-1.06311	GA Biosynthesis	ent-kaurenoic acid hydroxylase 2 (KAO2)
BnaC06g39870D	-2.62966	-3.34915	GA Biosynthesis	GA REQUIRING 2 (GA2)
BnaA07g07480D	-2.6105	-2.63322	GA Biosynthesis	gibberellin 2-oxidase (GA2OX2)
BnaC07g09260D	-2.18068	-1.91517	GA Biosynthesis	gibberellin 2-oxidase (GA2OX2)
BnaA10g23640D	-2.08786	-3.44931	GA Biosynthesis	gibberellin 20-oxidase 3 (GA20OX3)
BnaC07g28980D	-1.85633	-2.70278	GA Biosynthesis	GA requiring 3 (GA3)
BnaA06g27960D	-1.65393	-2.80583	GA Biosynthesis	GA requiring 3 (GA3)
BnaC06g38910D	5.14975	4.01652	GA Biosynthesis	Arabidopsis thaliana gibberellin 2-oxidase 1 (ATGA2OX1)
BnaC03g59610D	6.17991	1.51563	GA Biosynthesis	gibberellin 2-oxidase (GA2OX2)
BnaA01g35230D	-3.73419	-	GA Biosynthesis	GA20OX1
BnaA07g39200D	8.12928	-	GA Biosynthesis	Arabidopsis thaliana gibberellin 2-oxidase 1 (ATGA2OX1)
BnaA09g01090D	-2.70934	-	GA Biosynthesis	GA REQUIRING 1 (GA1)
BnaA09g26500D	-4.09917	-	GA Biosynthesis	gibberellin 2-oxidase (GA2OX2)
BnaC02g01710D	-7.05889	-	GA Biosynthesis	gibberellin 20-oxidase 3 (GA20OX3)
BnaC03g02920D	-3.07714	-	GA Biosynthesis	gibberellin 20-oxidase 3 (GA20OX3)
BnaC03g19010D	-8.61961	-	GA Biosynthesis	gibberellin 2-oxidase 3 (ATGA2OX3)
BnaC04g12350D	-1.33744	-	GA Biosynthesis	ent-kaurenoic acid hydroxylase 2 (KAO2)
BnaC09g00230D	1.91938	-	GA Biosynthesis	GA REQUIRING 1 (GA1)
BnaC09g48370D	-1.78329	-	GA Biosynthesis	gibberellin 20-oxidase 3 (GA20OX3)
BnaCnng76580D	-8.17991	-	GA Biosynthesis	gibberellin 20 oxidase 2 (GA20OX2)
BnaC05g23000D	-	-3.078	GA Biosynthesis	gibberellin 2-oxidase (GA2OX2)
BnaCnng35770D	-	3.05528	GA Biosynthesis	Arabidopsis thaliana gibberellin 2-oxidase 1 (ATGA2OX1)
BnaC01g40470D	-7.02237	-7.22882	GA signaling	phytochrome interacting factor 4 (PIF4)
BnaC03g05370D	-7.02237	-7.22882	GA signaling	phytochrome interacting factor 4 (PIF4)
BnaA03g19970D	-5.87678	-4.58959	GA signaling	phytochrome interacting factor 4 (PIF4)
BnaA05g32640D	-5.37736	-4.29727	GA signaling	RGA-like 2 (RGL2)
BnaC05g47760D	-5.26967	-2.72837	GA signaling	RGA-like 2 (RGL2)
BnaC04g48630D	-5.22724	-5.53725	GA signaling	phytochrome interacting factor 4 (PIF4)
BnaC03g23970D	-5.2096	-3.86924	GA signaling	phytochrome interacting factor 4 (PIF4)
BnaA04g24760D	-4.2396	-5.15405	GA signaling	phytochrome interacting factor 4 (PIF4)
BnaC09g40420D	-1.71948	-2.22908	GA signaling	RGA-like protein 3 (RGL3)
BnaA09g55590D	2.4849	2.42238	GA signaling	GA INSENSITIVE DWARF1B (GID1B)
BnaCnng55170D	2.96263	2.81081	GA signaling	GA INSENSITIVE DWARF1B (GID1B)
BnaA06g37850D	3.10069	3.48865	GA signaling	phytochrome interacting factor 3 (PIF3)
BnaA07g19530D	-3.47032	-	GA signaling	GA INSENSITIVE DWARF1B (GID1B)
BnaC04g21040D	-1.45457	-	GA signaling	GA INSENSITIVE DWARF1B (GID1B)
BnaCnng69280D	4.22239	-	GA signaling	GA INSENSITIVE DWARF1B (GID1B)
BnaA10g17240D	-	-3.41482	GA signaling	RGA-like protein 3 (RGL3)
BnaC05g46680D	-	2.37395	GA signaling	GA INSENSITIVE DWARF1A (GID1A)
BnaC02g15950D	-4.38004	-3.25904	JA biosynthesis	lipoxygenase 2 (LOX2)
BnaC08g37440D	-2.87213	-2.19696	JA biosynthesis	12-oxophytodienoate reductase 2 (OPR2)
BnaC02g21440D	-2.62526	-6.61934	JA biosynthesis	PLAT/LH2 domain-containing lipoxygenase family protein
BnaA02g17670D	-2.40715	-2.43444	JA biosynthesis	12-oxophytodienoate reductase 1 (OPR1)
BnaC06g18870D	-2.37666	-1.2847	JA biosynthesis	lipoxygenase 2 (LOX2)
BnaA02g16020D	-2.14092	-7.42682	JA biosynthesis	PLAT/LH2 domain-containing lipoxygenase family protein
BnaA09g44740D	-1.94149	-2.60618	JA biosynthesis	12-oxophytodienoate reductase 2 (OPR2)
BnaC06g26670D	-1.62872	-1.43623	JA biosynthesis	PLAT/LH2 domain-containing lipoxygenase family protein
BnaA08g24350D	-1.4717	-1.87794	JA biosynthesis	allene oxide cyclase 4 (AOC4)
BnaC08g15790D	-1.45575	-1.83796	JA biosynthesis	allene oxide cyclase 4 (AOC4)
BnaA07g24960D	-1.21784	-1.01225	JA biosynthesis	PLAT/LH2 domain-containing lipoxygenase family protein
BnaC08g37760D	1.09875	-2.68148	JA biosynthesis	lipoxygenase 3 (LOX3)
BnaA09g45010D	1.20123	-1.37007	JA biosynthesis	lipoxygenase 3 (LOX3)
BnaC03g45030D	1.94403	-2.79001	JA biosynthesis	oxophytodienoate-reductase 3 (OPR3)
BnaC09g52550D	3.24394	-1.63264	JA biosynthesis	allene oxide cyclase 3 (AOC3)
BnaA09g19550D	5.59811	2.40205	JA biosynthesis	allene oxide cyclase 2 (AOC2)
BnaC09g41020D	6	3.51198	JA biosynthesis	12-oxophytodienoate reductase 1 (OPR1)
BnaA06g33410D	6.49446	2.86561	JA biosynthesis	allene oxide cyclase 2 (AOC2)
BnaA10g17650D	7.66888	5.37359	JA biosynthesis	12-oxophytodienoate reductase 1 (OPR1)
BnaC07g22900D	8.85591	3.56166	JA biosynthesis	allene oxide cyclase 2 (AOC2)
BnaA07g19600D	-2.08498	-	JA biosynthesis	lipoxygenase 2 (LOX2)
BnaA07g24860D	-3.82384	-	JA biosynthesis	lipoxygenase 2 (LOX2)
BnaA09g19570D	2.81512	-	JA biosynthesis	allene oxide cyclase 3 (AOC3)
BnaC06g26190D	-3.63485	-	JA biosynthesis	lipoxygenase 2 (LOX2)
BnaC07g22910D	4.26845	-	JA biosynthesis	allene oxide cyclase 2 (AOC2)
BnaC09g52570D	2.38322	-	JA biosynthesis	allene oxide cyclase 2 (AOC2)
BnaCnng76690D	5.41864	-	JA biosynthesis	allene oxide cyclase 2 (AOC2)
BnaA02g13230D	-	-1.96309	JA biosynthesis	PLAT/LH2 domain-containing lipoxygenase family protein
BnaA02g23180D	-	-1.31171	JA biosynthesis	allene oxide synthase (AOS)
BnaA03g38210D	-	-1.42143	JA biosynthesis	oxophytodienoate-reductase 3 (OPR3)
BnaA08g23120D	-	-1.9245	JA biosynthesis	lipoxygenase 3 (LOX3)
BnaC02g29610D	-	-2.06815	JA biosynthesis	allene oxide synthase (AOS)
BnaC02g45800D	-	-1.41824	JA biosynthesis	PLAT/LH2 domain-containing lipoxygenase family protein
BnaC08g48320D	-	-2.98979	JA biosynthesis	lipoxygenase 3 (LOX3)
BnaC06g22690D	-2.30303	-3.37567	JA signaling	TIFY10B
BnaA04g29730D	-2.23125	-1.26721	JA signaling	JASMONATE RESISTANT 1 (JAR1)
BnaA07g31880D	-2.00076	-2.96733	JA signaling	TIFY10B
BnaCnng08230D	-1.71999	-2.63941	JA signaling	TIFY10B
BnaA07g21950D	-1.63107	-6.86694	JA signaling	TIFY10B
BnaA07g21960D	-1.48665	-3.08576	JA signaling	TIFY10B
BnaA07g28810D	-1.43836	-2.88268	JA signaling	TIFY7
BnaC06g31830D	-1.22757	-2.64103	JA signaling	TIFY7
BnaA02g17040D	-1.07462	-3.70672	JA signaling	TIFY10B
BnaA02g05120D	-1.02113	-1.62336	JA signaling	jasmonate-zim-domain protein 12 (JAZ12)
BnaA08g22180D	1.63931	-2.05196	JA signaling	TIFY10A
BnaA03g04250D	2.16773	-3.05724	JA signaling	jasmonate-zim-domain protein 10
BnaC05g14810D	2.35917	1.44027	JA signaling	TIFY10A
BnaA10g20060D	2.49735	-1.1863	JA signaling	jasmonate-zim-domain protein 10
BnaC03g71460D	2.71026	-1.45999	JA signaling	jasmonate-zim-domain protein 10
BnaCnng59530D	3.23145	1.73214	JA signaling	JASMONATE RESISTANT 1 (JAR1)
BnaA03g21360D	3.73039	2.00942	JA signaling	JASMONATE RESISTANT 1 (JAR1)
BnaA02g01520D	2.5889	-	JA signaling	jasmonate-zim-domain protein 10
BnaA04g22750D	1.2854	-	JA signaling	CORONATINE INSENSITIVE 1 (COI1)
BnaA05g05650D	-1.41493	-	JA signaling	CORONATINE INSENSITIVE 1 (COI1)
BnaA05g22360D	1.70202	-	JA signaling	jasmonate-zim-domain protein 3 (JAZ3)
BnaA06g11690D	-4.02554	-	JA signaling	jasmonate-zim-domain protein 5 (JAZ5)
BnaA07g23750D	1.30985	-	JA signaling	TIFY7
BnaC02g04570D	4.24793	-	JA signaling	jasmonate-zim-domain protein 10
BnaC02g20120D	2.30886	-	JA signaling	TIFY7
BnaC03g22310D	-1.64342	-	JA signaling	CORONATINE INSENSITIVE 1 (COI1)
BnaC04g50800D	-1.13937	-	JA signaling	JASMONATE RESISTANT 1 (JAR1)
BnaC05g13540D	-1.88118	-	JA signaling	jasmonate-zim-domain protein 5 (JAZ5)
BnaC08g18640D	2.68184	-	JA signaling	TIFY10A
BnaC08g36840D	3.83914	-	JA signaling	TIFY10A
BnaC09g43860D	1.29584	-	JA signaling	jasmonate-zim-domain protein 10
BnaCnng65670D	1.33064	-	JA signaling	TIFY7
BnaA01g27170D	-	-1.25798	JA signaling	jasmonate-zim-domain protein 3 (JAZ3)
BnaA02g15990D	-	-2.35174	JA signaling	jasmonate-zim-domain protein 6 (JAZ6)
BnaA07g30200D	-	-2.9163	JA signaling	jasmonate-zim-domain protein 6 (JAZ6)
BnaA08g23150D	-	-2.92841	JA signaling	jasmonate-zim-domain protein 5 (JAZ5)
BnaAnng41010D	-	-1.64018	JA signaling	jasmonate-zim-domain protein 3 (JAZ3)
BnaC01g34620D	-	-1.23543	JA signaling	jasmonate-zim-domain protein 3 (JAZ3)
BnaC02g45660D	-	-2.14211	JA signaling	jasmonate-zim-domain protein 6 (JAZ6)
BnaC04g01170D	-	1.14641	JA signaling	JASMONATE RESISTANT 1 (JAR1)
BnaC05g35610D	-	-1.5822	JA signaling	jasmonate-zim-domain protein 3 (JAZ3)
BnaC06g24560D	-	-3.57387	JA signaling	TIFY7
BnaC06g33640D	-	-1.51793	JA signaling	jasmonate-zim-domain protein 6 (JAZ6)
BnaC06g35750D	-	-1.31129	JA signaling	TIFY10B
BnaC08g37780D	-	-3.47533	JA signaling	jasmonate-zim-domain protein 5 (JAZ5)
BnaC08g48340D	-	-3.24081	JA signaling	jasmonate-zim-domain protein 5 (JAZ5)
BnaC03g33880D	-4.07542	-1.42805	JA/ET signaling	pathogenesis-related 4 (PR4)
BnaA05g18020D	-2.78666	-2.99702	JA/ET signaling	MYC2
BnaC01g10420D	-2.64134	-2.17212	JA/ET signaling	Basic helix-loop-helix (bHLH) DNA-binding family protein
BnaA01g23940D	-2.16949	-2.32726	JA/ET signaling	ethylene response factor 1 (ERF1)
BnaC07g19420D	-1.99403	-1.44411	JA/ET signaling	Basic helix-loop-helix (bHLH) DNA-binding family protein
BnaC05g28450D	-1.77865	-2.65724	JA/ET signaling	MYC2
BnaA07g32150D	-1.75261	-1.53233	JA/ET signaling	plant defensin 1.2 (PDF1.2)
BnaA06g40330D	-1.70493	-1.51735	JA/ET signaling	Basic helix-loop-helix (bHLH) DNA-binding family protein
BnaA07g32130D	-1.69188	-1.86862	JA/ET signaling	plant defensin 1.2 (PDF1.2)
BnaA09g18160D	-1.62764	-1.29501	JA/ET signaling	Basic helix-loop-helix (bHLH) DNA-binding family protein
BnaC09g19610D	-1.60852	-1.34294	JA/ET signaling	Basic helix-loop-helix (bHLH) DNA-binding family protein
BnaA03g28760D	-1.48266	-	JA/ET signaling	pathogenesis-related 4 (PR4)
BnaA03g28770D	-1.82916	-	JA/ET signaling	pathogenesis-related 4 (PR4)
BnaA03g28780D	-	8.72565	JA/ET signaling	pathogenesis-related 4 (PR4)
BnaC02g23620D	-	-1.46073	JA/ET signaling	plant defensin 1.2 (PDF1.2)
BnaC03g37570D	-	-1.71574	JA/ET signaling	basic chitinase (HCHIB)
BnaC06g36530D	-	9.11201	JA/ET signaling	plant defensin 1.2 (PDF1.2)
BnaC08g07580D	-	-2.05065	JA/ET signaling	MYC2
BnaA07g22090D	-2.41889	-1.03328	SA biosynthesis	ENHANCED DISEASE SUSCEPTIBILITY TO ERYSIPHE ORONTII 16 (EDS16)
BnaA06g13060D	-2.33442	-2.68806	SA biosynthesis	isochorismate synthase 2 (ICS2)
BnaCnng08300D	-2.07268	-1.7043	SA biosynthesis	ENHANCED DISEASE SUSCEPTIBILITY TO ERYSIPHE ORONTII 16 (EDS16)
BnaC06g35540D	-1.93129	-1.48193	SA biosynthesis	ENHANCED DISEASE SUSCEPTIBILITY TO ERYSIPHE ORONTII 16 (EDS16)
BnaC06g22820D	-1.60722	-1.12056	SA biosynthesis	ENHANCED DISEASE SUSCEPTIBILITY TO ERYSIPHE ORONTII 16 (EDS16)
BnaC08g18420D	-1.3275	-1.6691	SA biosynthesis	isochorismate synthase 2 (ICS2)
BnaA08g22340D	-1.04951	-1.33528	SA biosynthesis	isochorismate synthase 2 (ICS2)
BnaC05g14570D	-2.78011	-	SA biosynthesis	isochorismate synthase 2 (ICS2)
BnaC04g24530D	-8.45121	-7.96578	SA signaling	BLADE ON PETIOLE 1 (BOP1)
BnaC09g12000D	-3.77259	-4.62936	SA signaling	NONEXPRESSER OF PR GENES 1 (NPR1)
BnaC03g45470D	-3.58708	-4.00182	SA signaling	pathogenesis-related gene 1 (PR1)
BnaA10g22150D	-2.69419	-1.53019	SA signaling	TGACG motif-binding factor 4 (TGA4)
BnaA06g24140D	-2.55876	-2.03004	SA signaling	TGA1
BnaA01g30760D	-2.40651	-3.12199	SA signaling	TGACG motif-binding factor 6 (TGA6)
BnaC03g49070D	-2.36953	-1.20375	SA signaling	TGA1
BnaA10g24020D	-1.81306	-1.77259	SA signaling	AHBP-1B
BnaA01g15290D	-1.77319	-1.77687	SA signaling	NONEXPRESSER OF PR GENES 1 (NPR1)
BnaC01g18080D	-1.75222	-1.57547	SA signaling	NONEXPRESSER OF PR GENES 1 (NPR1)
BnaC02g01780D	-1.59187	-1.306	SA signaling	OCS-element binding factor 5 (OBF5)
BnaC03g37460D	-1.51778	-1.30977	SA signaling	TGACG motif-binding factor 6 (TGA6)
BnaA01g10220D	-1.48528	-1.87966	SA signaling	NPR1-like protein 4 (NPR4)
BnaAnng01920D	-1.26408	-1.54774	SA signaling	OCS-element binding factor 5 (OBF5)
BnaC01g18130D	1.56288	1.09478	SA signaling	Ankyrin repeat family protein / BTB/POZ domain-containing protein
BnaC04g47620D	2.59368	2.68326	SA signaling	BLADE ON PETIOLE2 (BOP2)
BnaA03g32170D	-1.45606	-	SA signaling	TGACG motif-binding factor 6 (TGA6)
BnaA05g26790D	-1.35933	-	SA signaling	TGACG motif-binding factor 6 (TGA6)
BnaA06g04770D	-4.01282	-	SA signaling	bZIP transcription factor family protein
BnaA07g33790D	-1.05323	-	SA signaling	bZIP transcription factor family protein
BnaA08g20970D	2.23428	-	SA signaling	TGA1A-related gene 3 (TGA3)
BnaA09g11550D	-1.04795	-	SA signaling	NONEXPRESSER OF PR GENES 1 (NPR1)
BnaC02g43620D	-9.32942	-	SA signaling	TGA1
BnaC05g06030D	-2.31647	-	SA signaling	bZIP transcription factor family protein
BnaC06g20630D	-1.26568	-	SA signaling	bZIP transcription factor family protein
BnaC06g30310D	-4.32193	-	SA signaling	PERIANTHIA (PAN)
BnaC08g20170D	2.61873	-	SA signaling	TGA1A-related gene 3 (TGA3)
BnaC08g28070D	7.02237	-	SA signaling	BLADE ON PETIOLE 1 (BOP1)
BnaC08g43230D	-7.16323	-	SA signaling	bZIP transcription factor family protein
BnaC09g46670D	-2.44508	-	SA signaling	TGACG motif-binding factor 4 (TGA4)
BnaCnng22950D	-2.4777	-	SA signaling	TGACG motif-binding factor 6 (TGA6)
BnaA01g15310D	-	1.04356	SA signaling	Ankyrin repeat family protein / BTB/POZ domain-containing protein
BnaA02g23720D	-	3.14229	SA signaling	NPR1-like protein 3 (NPR3)
BnaA07g20770D	-	1.30795	SA signaling	bZIP transcription factor family protein
BnaC01g12020D	-	-1.4772	SA signaling	NPR1-like protein 4 (NPR4)
BnaC08g03660D	-	-10.2328	SA signaling	pathogenesis-related gene 1 (PR1)
