# Supplementary material for: Characterization of cold stress responses in different rapeseed ecotypes based on metabolomics and transcriptomics analyses
Source: PeerJ. 2020 Mar 31;8:e8704. doi: 10.7717/peerj.8704 (PMC7120054; doi:10.7717/peerj.8704)
Supplement: Supplemental Information 9 [file peerj-08-8704-s009.xlsx]

## Sheet: S7
Table S7 Identification of DEGs related to temperature stress response in winter and spring B. napus ecotypes after cold stress.
Groups	Gene ID	28W-vs-4W_log2(FC)	28S-vs-4S_log2(FC)	AGI	Function descriptions
Common up
	BnaA05g11380D	2.47797	1.59648	AT2G31360	16:0delta9 desaturase 2 (DS2)
	BnaC03g17450D	2.9421	1.52859	AT2G31360	16:0delta9 desaturase 2 (DS2)
	BnaA04g18360D	3.32907	2.90605	AT2G31360	16:0delta9 desaturase 2 (DS2)
	BnaC04g42440D	3.52212	3.10731	AT2G31360	16:0delta9 desaturase 2 (DS2)
	BnaA03g14390D	3.64114	2.33367	AT2G31360	16:0delta9 desaturase 2 (DS2)
	BnaA10g15190D	9.6421	3.47221	AT5G20230	blue-copper-binding protein (BCB)
	BnaC09g37560D	10.1021	2.16847	AT5G20230	blue-copper-binding protein (BCB)
	BnaA03g43160D	3.13721	1.93591	AT4G17615	calcineurin B-like protein 1 (CBL1)
	BnaC07g34450D	3.18596	1.92956	AT4G17615	calcineurin B-like protein 1 (CBL1)
	BnaC01g21190D	1.90582	3.94812	AT4G17090	chloroplast beta-amylase (CT-BMY)
	BnaA01g17940D	1.96849	2.853	AT4G17090	chloroplast beta-amylase (CT-BMY)
	BnaC07g34180D	2.16462	3.06278	AT4G17090	chloroplast beta-amylase (CT-BMY)
	BnaA03g42940D	2.46113	2.8729	AT4G17090	chloroplast beta-amylase (CT-BMY)
	BnaC03g23770D	3.34012	4.22451	AT2G42530	cold regulated 15b (COR15B)
	BnaA03g56650D	5.12463	5.89703	AT2G42530	cold regulated 15b (COR15B)
	BnaC03g23750D	6.15677	6.32319	AT2G42530	cold regulated 15b (COR15B)
	BnaA03g56750D	7.42636	8.27578	AT2G42530	cold regulated 15b (COR15B)
	BnaC03g45990D	1.49414	1.27216	AT2G15970	cold regulated 413 plasma membrane 1 (COR413-PM1)
	BnaCnng37450D	1.69589	2.35153	AT2G15970	cold regulated 413 plasma membrane 1 (COR413-PM1)
	BnaA07g03740D	1.71322	2.95914	AT2G15970	cold regulated 413 plasma membrane 1 (COR413-PM1)
	BnaA08g16610D	2.71852	2.70744	AT4G39260	cold, circadian rhythm, and RNA binding 1 (CCR1)
	BnaA03g56740D	5.08329	5.8174	AT2G42540	cold-regulated 15a (COR15A)
	BnaCnng49280D	10.9094	10.5314	AT4G25490	C-repeat/DRE binding factor 1 (CBF1)
	BnaA08g30910D	12.2771	12.1653	AT4G25490	C-repeat/DRE binding factor 1 (CBF1)
	BnaA03g13620D	2.01957	2.39163	AT4G25470	C-repeat/DRE binding factor 2 (CBF2)
	BnaC07g39680D	3.26038	7.06255	AT4G25470	C-repeat/DRE binding factor 2 (CBF2)
	BnaAnng34260D	4.52482	5.67278	AT4G25470	C-repeat/DRE binding factor 2 (CBF2)
	BnaA08g30930D	8.51833	9.40939	AT4G25470	C-repeat/DRE binding factor 2 (CBF2)
	BnaUnng01150D	9.32193	9.66178	AT4G25470	C-repeat/DRE binding factor 2 (CBF2)
	BnaA08g30950D	10.7285	11.8403	AT4G25470	C-repeat/DRE binding factor 2 (CBF2)
	BnaC09g28190D	2.45508	2.1748	AT5G51990	C-repeat-binding factor 4 (CBF4)
	BnaCnng38100D	2.43494	2.97863	AT5G53290	cytokinin response factor 3 (CRF3)
	BnaC01g38380D	1.56499	1.96734	AT3G12490	cystatin B (CYSB)
	BnaCnng20570D	2.63177	1.17185	AT5G04340	zinc finger of Arabidopsis thaliana 6 (ZAT6)
	BnaC08g21640D	2.70007	1.26732	AT3G50260	cooperatively regulated by ethylene and jasmonate 1 (CEJ1)
	BnaC04g05620D	2.73697	2.48403	AT2G39800	delta1-pyrroline-5-carboxylate synthase 1 (P5CS1)
	BnaA05g05760D	4.11244	3.27917	AT2G39800	delta1-pyrroline-5-carboxylate synthase 1 (P5CS1)
	BnaA06g22880D	1.97464	1.31152	AT5G63770	diacylglycerol kinase 2 (DGK2)
	BnaC03g50600D	2.95235	1.72148	AT5G63770	diacylglycerol kinase 2 (DGK2)
	BnaC03g50590D	3.81595	2.25203	AT5G63770	diacylglycerol kinase 2 (DGK2)
	BnaC06g08980D	1.6644	1.2135	AT1G51700	DOF zinc finger protein 1 (DOF1)
	BnaC09g49920D	1.71493	1.32299	AT5G05410	DRE-binding protein 2A (DREB2A)
	BnaA01g19110D	2.15242	3.23359	AT4G14690	EARLY LIGHT-INDUCIBLE PROTEIN 2 (ELIP2)
	BnaA07g21490D	3.13055	3.50997	AT1G76180	EARLY RESPONSE TO DEHYDRATION 14 (ERD14)
	BnaA07g32420D	3.39762	3.28489	AT1G76180	EARLY RESPONSE TO DEHYDRATION 14 (ERD14)
	BnaC06g36880D	3.55177	3.37996	AT1G76180	EARLY RESPONSE TO DEHYDRATION 14 (ERD14)
	BnaAnng29030D	4.41785	3.55212	AT1G76180	EARLY RESPONSE TO DEHYDRATION 14 (ERD14)
	BnaA02g36030D	5.79752	4.38051	AT1G76180	EARLY RESPONSE TO DEHYDRATION 14 (ERD14)
	BnaC05g15780D	5.19041	5.56353	AT1G20450	EARLY RESPONSIVE TO DEHYDRATION 10 (ERD10)
	BnaA07g11450D	5.92157	6.79105	AT1G20450	EARLY RESPONSIVE TO DEHYDRATION 10 (ERD10)
	BnaC07g15380D	6.20843	6.4511	AT1G20450	EARLY RESPONSIVE TO DEHYDRATION 10 (ERD10)
	BnaA06g25550D	3.27869	3.05252	AT2G17840	EARLY-RESPONSIVE TO DEHYDRATION 7 (ERD7)
	BnaC03g48070D	4.1638	2.84667	AT2G17840	EARLY-RESPONSIVE TO DEHYDRATION 7 (ERD7)
	BnaA07g03060D	4.29606	4.26086	AT2G17840	EARLY-RESPONSIVE TO DEHYDRATION 7 (ERD7)
	BnaC07g06930D	6.75973	5.48575	AT2G17840	EARLY-RESPONSIVE TO DEHYDRATION 7 (ERD7)
	BnaA05g01520D	1.37492	1.11179	AT2G46270	G-box binding factor 3 (GBF3)
	BnaC01g38510D	1.02296	2.39625	AT3G12580	heat shock protein 70 (HSP70)
	BnaA09g05850D	1.05002	2.11633	AT5G02500	heat shock cognate protein 70-1 (HSC70-1)
	BnaC05g20170D	1.05258	2.18229	AT5G02500	heat shock cognate protein 70-1 (HSC70-1)
	BnaA01g30490D	1.06152	1.02739	AT3G12580	heat shock protein 70 (HSP70)
	BnaC09g42450D	1.08536	2.06349	AT5G15450	casein lytic proteinase B3 (CLPB3)
	BnaC05g20480D	1.11879	1.37851	AT1G55490	chaperonin 60 beta (CPN60B)
	BnaA06g00870D	1.16033	1.11607	AT1G79930	heat shock protein 91 (HSP91)
	BnaC04g42020D	1.18704	2.18214	AT5G02500	heat shock cognate protein 70-1 (HSC70-1)
	BnaA03g42340D	1.21705	2.32193	AT4G16100	Protein of unknown function (DUF789)
	BnaC04g42010D	1.24189	2.24728	AT5G02500	heat shock cognate protein 70-1 (HSC70-1)
	BnaA10g27070D	1.37305	1.76414	AT5G02500	heat shock cognate protein 70-1 (HSC70-1)
	BnaCnng24180D	1.3995	1.66458	AT3G08970	ATERDJ3A
	BnaA09g29090D	1.5607	2.77729	AT5G02500	heat shock cognate protein 70-1 (HSC70-1)
	BnaA10g27060D	1.69578	2.08465	AT5G02500	heat shock cognate protein 70-1 (HSC70-1)
	BnaC06g01970D	1.85889	1.63532	AT5G02500	heat shock cognate protein 70-1 (HSC70-1)
	BnaC01g27600D	1.95312	1.98549	AT5G02500	heat shock cognate protein 70-1 (HSC70-1)
	BnaC08g43490D	2.03624	1.3751	AT1G07890	ascorbate peroxidase 1 (APX1)
	BnaA03g53750D	2.11646	1.83935	AT4G36990	heat shock factor 4 (HSF4)
	BnaA09g49190D	2.16752	1.91308	AT1G07890	ascorbate peroxidase 1 (APX1)
	BnaA09g29110D	2.1908	5.35975	AT5G02490	Heat shock protein 70 (Hsp 70) family protein
	BnaCnng03470D	2.64182	2.69885	AT5G02500	heat shock cognate protein 70-1 (HSC70-1)
	BnaCnng03460D	2.6649	2.75706	AT5G02500	heat shock cognate protein 70-1 (HSC70-1)
	BnaC05g12240D	2.66525	1.29325	AT1G16030	heat shock protein 70B (Hsp70b)
	BnaC03g37680D	2.78674	3.91975	AT3G12580	heat shock protein 70 (HSP70)
	BnaA05g32290D	2.9386	1.83724	AT3G02990	heat shock transcription factor A1E (HSFA1E)
	BnaA09g43130D	3.11872	1.05529	AT2G21510	DNAJ heat shock N-terminal domain-containing protein
	BnaC05g29680D	3.85086	3.54226	AT3G22830	heat shock transcription factor A6B (HSFA6B)
	BnaA03g32320D	3.8651	5.29845	AT3G12580	heat shock protein 70 (HSP70)
	BnaA05g16880D	4.04924	10.6227	AT3G22830	heat shock transcription factor A6B (HSFA6B)
	BnaC01g27590D	4.14101	3.87036	AT5G02490	Heat shock protein 70 (Hsp 70) family protein
	BnaA05g32280D	4.63693	2.38543	AT3G02990	heat shock transcription factor A1E (HSFA1E)
	BnaAnng33370D	9.38802	8.77039	AT5G02490	Heat shock protein 70 (Hsp 70) family protein
	BnaA01g24460D	9.82443	8.32193	AT3G22830	heat shock transcription factor A6B (HSFA6B)
	BnaAnng15470D	10.348	5.35755	AT1G07890	ascorbate peroxidase 1 (APX1)
	BnaA07g05580D	1.33535	2.34946	AT3G24520	heat shock transcription factor C1 (HSFC1)
	BnaC03g43990D	2.66626	4.04052	AT3G24520	heat shock transcription factor C1 (HSFC1)
	BnaA03g37460D	2.90728	3.44637	AT3G24520	heat shock transcription factor C1 (HSFC1)
	BnaC07g07130D	3.75743	3.46495	AT3G24520	heat shock transcription factor C1 (HSFC1)
	BnaA08g24520D	1.02751	1.34861	AT1G12860	SCREAM 2 (SCRM2)
	BnaAnng37980D	1.73513	2.10247	AT5G15970	KIN2
	BnaA02g02910D	2.79302	3.18471	AT5G15970	KIN2
	BnaCnng75390D	2.79941	1.76045	AT5G06760	Late Embryogenesis Abundant 4-5 (LEA4-5)
	BnaA03g55670D	4.22936	3.56832	AT5G06760	Late Embryogenesis Abundant 4-5 (LEA4-5)
	BnaCnng44320D	5.69575	3.8139	AT5G06760	Late Embryogenesis Abundant 4-5 (LEA4-5)
	BnaA10g24180D	8.28678	11.3109	AT5G06760	Late Embryogenesis Abundant 4-5 (LEA4-5)
	BnaC09g48810D	8.38632	6.01461	AT5G06760	Late Embryogenesis Abundant 4-5 (LEA4-5)
	BnaC02g15280D	1.69043	3.92304	AT5G52300	LOW-TEMPERATURE-INDUCED 65 (LTI65)
	BnaA02g10980D	3.09557	3.81667	AT5G52300	LOW-TEMPERATURE-INDUCED 65 (LTI65)
	BnaA03g12660D	3.79874	3.38722	AT5G52300	LOW-TEMPERATURE-INDUCED 65 (LTI65)
	BnaA02g10970D	4.19972	4.38069	AT5G52300	LOW-TEMPERATURE-INDUCED 65 (LTI65)
	BnaC02g15270D	4.797	4.80007	AT5G52300	LOW-TEMPERATURE-INDUCED 65 (LTI65)
	BnaC03g15510D	5.67713	5.65105	AT5G52300	LOW-TEMPERATURE-INDUCED 65 (LTI65)
	BnaA06g21090D	2.2551	1.2971	AT3G49530	NAC domain containing protein 62 (NAC062)
	BnaC03g72040D	1.4959	3.15295	AT2G37770	NAD(P)-linked oxidoreductase superfamily protein
	BnaC04g53580D	2.47593	4.14132	AT2G37760	NAD(P)-linked oxidoreductase superfamily protein
	BnaC04g15130D	1.31314	1.52823	AT2G28900	outer plastid envelope protein 16-1 (OEP16-1)
	BnaA07g14320D	1.53107	2.01192	AT2G28900	outer plastid envelope protein 16-1 (OEP16-1)
	BnaC03g12400D	1.91511	2.24311	AT5G58670	phospholipase C1 (PLC1)
	BnaA05g17280D	1.29255	1.01931	AT3G22310	putative mitochondrial RNA helicase 1 (PMH1)
	BnaC05g30220D	1.82455	1.60976	AT3G22310	putative mitochondrial RNA helicase 1 (PMH1)
	BnaC05g45940D	5.83396	5.94961	AT3G05880	RARE-COLD-INDUCIBLE 2A (RCI2A)
	BnaC03g34410D	6.62062	6.49222	AT3G05880	RARE-COLD-INDUCIBLE 2A (RCI2A)
	BnaA03g29210D	8.08945	5.13175	AT3G05880	RARE-COLD-INDUCIBLE 2A (RCI2A)
	BnaC08g26510D	8.39084	8.59482	AT3G55580	Regulator of chromosome condensation (RCC1) family protein
	BnaA09g35210D	9.14391	9.16833	AT3G55580	Regulator of chromosome condensation (RCC1) family protein
	BnaA06g07470D	1.04621	1.06703	AT1G13260	related to ABI3/VP1 1 (RAV1)
	BnaA09g07980D	2.07378	3.54343	AT5G66400	RESPONSIVE TO ABA 18 (RAB18)
	BnaCnng27850D	2.07378	3.54343	AT5G66400	RESPONSIVE TO ABA 18 (RAB18)
	BnaC09g08130D	2.89948	3.33629	AT5G66400	RESPONSIVE TO ABA 18 (RAB18)
	BnaA02g34800D	5.46877	8.52915	AT5G66400	RESPONSIVE TO ABA 18 (RAB18)
	BnaC02g45160D	8.70458	9.05625	AT5G66400	RESPONSIVE TO ABA 18 (RAB18)
	BnaA05g12950D	5.55065	5.48382	AT5G37260	REVEILLE 2 (RVE2)
	BnaC06g12130D	6.09886	6.3902	AT5G37260	REVEILLE 2 (RVE2)
	BnaUnng00020D	2.01746	1.80939	AT5G37770	TOUCH 2 (TCH2)
	BnaC07g31620D	1.54005	1.35773	AT3G49990	unknown protein
	BnaA10g17250D	5.07403	4.81559	AT3G03341	unknown protein
	BnaC09g40440D	6.25646	5.2818	AT3G03341	unknown protein
	BnaC07g16940D	2.35805	3.06481	AT1G27730	salt tolerance zinc finger (STZ)
	BnaA10g12780D	2.68233	3.19967	AT5G59820	RESPONSIVE TO HIGH LIGHT 41 (RHL41)
	BnaC09g35160D	3.28167	3.56157	AT5G59820	RESPONSIVE TO HIGH LIGHT 41 (RHL41)
	BnaA02g06790D	4.15663	3.35031	AT5G59820	RESPONSIVE TO HIGH LIGHT 41 (RHL41)
	BnaA02g06780D	4.82421	2.69316	AT5G59820	RESPONSIVE TO HIGH LIGHT 41 (RHL41)
Common down
	BnaC01g21960D	-1.12306	-1.10463	AT4G16160	ATOEP16-2
	BnaC02g48060D	-1.05666	-1.34157	AT3G26420	ATRZ-1A
	BnaC04g56860D	-2.04254	-2.83805	AT2G41130	basic helix-loop-helix (bHLH) DNA-binding superfamily protein
	BnaC04g01630D	-3.47626	-3.8679	AT2G41130	basic helix-loop-helix (bHLH) DNA-binding superfamily protein
	BnaA04g23710D	-2.20497	-1.36358	AT2G41130	basic helix-loop-helix (bHLH) DNA-binding superfamily protein
	BnaC03g74970D	-2.03674	-1.56827	AT5G62390	BCL-2-associated athanogene 7 (BAG7)
	BnaC09g44450D	-2.06412	-2.20937	AT5G12250	beta-6 tubulin (TUB6)
	BnaC04g10450D	-2.07596	-1.43852	AT5G12250	beta-6 tubulin (TUB6)
	BnaA10g20420D	-2.34867	-2.66066	AT5G12250	beta-6 tubulin (TUB6)
	BnaC03g61740D	-1.93717	-2.81429	AT4G37220	Cold acclimation protein WCOR413 family
	BnaA08g15470D	-2.68293	-5.13614	AT4G37220	Cold acclimation protein WCOR413 family
	BnaCnng42010D	-2.34377	-2.03395	AT4G36020	cold shock domain protein 1 (CSDP1)
	BnaA07g02430D	-3.078	-2.03317	AT2G17870	cold shock domain protein 3 (CSP3)
	BnaC07g05550D	-1.56916	-1.03511	AT4G39260	cold, circadian rhythm, and RNA binding 1 (CCR1)
	BnaC08g22210D	-1.92982	-2.19774	AT3G50830	cold-regulated 413-plasma membrane 2 (COR413-PM2)
	BnaA09g31450D	-2.47105	-2.00142	AT3G50830	cold-regulated 413-plasma membrane 2 (COR413-PM2)
	BnaC04g01080D	-2.87801	-1.95083	AT2G46310	cytokinin response factor 5 (CRF5)
	BnaA05g01500D	-3.53694	-1.47027	AT2G46310	cytokinin response factor 5 (CRF5)
	BnaA03g44810D	-1.34915	-1.29457	AT4G21670	C-terminal domain phosphatase-like 1 (CPL1)
	BnaCnng27960D	-1.36517	-1.38179	AT2G40140	CZF1
	BnaA05g34540D	-1.5634	-2.57208	AT2G40140	CZF1
	BnaC02g07600D	-1.77761	-2.02399	AT5G17890	DA1-related protein 4 (DAR4)
	BnaC08g37610D	-9.30682	-2.33832	AT1G17610	Disease resistance protein (TIR-NBS class)
	BnaC08g37600D	-2.74664	-2.55308	AT1G17610	Disease resistance protein (TIR-NBS class)
	BnaA09g44910D	-1.97336	-2.68718	AT1G17610	Disease resistance protein (TIR-NBS class)
	BnaA09g44900D	-5.61225	-3.02175	AT1G17610	Disease resistance protein (TIR-NBS class)
	BnaC04g50910D	-2.39892	-1.68527	AT2G46590	DOF AFFECTING GERMINATION 2 (DAG2)
	BnaA04g27160D	-2.72935	-1.61791	AT2G46590	DOF AFFECTING GERMINATION 2 (DAG2)
	BnaA06g05210D	-1.26811	-3.07045	AT1G08930	EARLY RESPONSE TO DEHYDRATION 6 (ERD6)
	BnaC07g20090D	-7.37844	-4.67819	AT5G47230	ethylene responsive element binding factor 5 (ERF5)
	BnaA09g18210D	-3.28023	-4.34379	AT5G47230	ethylene responsive element binding factor 5 (ERF5)
	BnaA06g40170D	-5.11842	-4.40312	AT5G47230	ethylene responsive element binding factor 5 (ERF5)
	BnaCnng05070D	-9.53787	-6.17659	AT4G17490	ethylene responsive element binding factor 6 (ERF6)
	BnaC01g10080D	-4.95331	-5.75257	AT4G17490	ethylene responsive element binding factor 6 (ERF6)
	BnaA08g08300D	-4.17437	-7.41084	AT4G17490	ethylene responsive element binding factor 6 (ERF6)
	BnaA01g34910D	-7.17385	-7.3255	AT4G17490	ethylene responsive element binding factor 6 (ERF6)
	BnaC09g46090D	-1.37715	-1.01065	AT5G10450	G-box regulating factor 6 (GRF6)
	BnaC04g33800D	-1.11731	-2.33513	AT2G21060	glycine-rich protein 2B (GRP2B)
	BnaA09g43450D	-1.06994	-1.44957	AT2G21060	glycine-rich protein 2B (GRP2B)
	BnaA04g11900D	-1.58496	-2.11802	AT2G21060	glycine-rich protein 2B (GRP2B)
	BnaC04g46660D	-1.42084	-2.06485	AT2G39810	HIGH EXPRESSION OF OSMOTICALLY RESPONSIVE GENES 1 (HOS1)
	BnaC04g46650D	-1.85283	-1.33138	AT2G39810	HIGH EXPRESSION OF OSMOTICALLY RESPONSIVE GENES 1 (HOS1)
	BnaCnng45540D	-2.52725	-2.31536	AT1G11660	heat shock protein 70 (Hsp 70) family protein
	BnaC09g44630D	-9.84025	-9.42347	AT5G12020	17.6 kDa class II heat shock protein (HSP17.6II)
	BnaC09g15060D	-2.01362	-2.32313	AT1G59725	DNAJ heat shock family protein
	BnaC08g25070D	-3.57344	-1.3569	AT3G54220	SCARECROW (SCR)
	BnaC08g10440D	-2.06667	-2.16332	AT4G15802	heat shock factor binding protein (HSBP)
	BnaC08g04780D	-7.49185	-7.86625	AT1G46264	heat shock transcription factor B4 (HSFB4)
	BnaC07g50110D	-1.59187	-1.68405	AT4G16660	heat shock protein 70 (Hsp 70) family protein
	BnaC07g38780D	-1.63769	-1.49602	AT4G24190	SHEPHERD (SHD)
	BnaC07g35520D	-1.04005	-2.44969	AT4G18880	heat shock transcription factor A4A (HSF A4A)
	BnaC07g22680D	-1.17284	-1.47091	AT2G04030	CR88
	BnaC06g37810D	-2.59394	-1.56951	AT1G77020	DNAJ heat shock N-terminal domain-containing protein
	BnaC06g35220D	-1.39486	-1.16872	AT1G74310	heat shock protein 101 (HSP101)
	BnaC06g29140D	-1.2922	-1.01791	AT1G67970	heat shock transcription factor A8 (HSFA8)
	BnaC05g43740D	-2.22529	-1.32599	AT3G08800	ARM repeat superfamily protein
	BnaC05g29770D	-8.50515	-8.26053	AT1G55490	chaperonin 60 beta (CPN60B)
	BnaC05g24440D	-2.45428	-2.07367	AT1G32330	heat shock transcription factor A1D (HSFA1D)
	BnaC05g04430D	-2.13086	-1.31177	AT1G06460	alpha-crystallin domain 32.1 (ACD32.1)
	BnaC04g53740D	-1.69609	-1.23389	AT2G35540	DNAJ heat shock N-terminal domain-containing protein
	BnaC04g52460D	-2.64155	-3.07895	AT2G42080	Chaperone DnaJ-domain superfamily protein
	BnaC04g37890D	-1.16095	-1.10331	AT2G25560	DNAJ heat shock N-terminal domain-containing protein
	BnaC04g12620D	-1.24249	-1.48099	AT2G32120	heat-shock protein 70T-2 (HSP70T-2)
	BnaC03g68680D	-1.67602	-2.48727	AT1G50500	HEAT-INTOLERANT 1 (HIT1)
	BnaC03g62890D	-1.1773	-1.80204	AT4G18880	heat shock transcription factor A4A (HSF A4A)
	BnaC03g31080D	-1.02076	-1.96515	AT4G02100	Heat shock protein DnaJ with tetratricopeptide repeat
	BnaC03g20830D	-1.52181	-2.35383	AT2G37630	ASYMMETRIC LEAVES 1 (AS1)
	BnaC03g17620D	-2.70895	-1.66458	AT2G31580	tRNAHis guanylyltransferase
	BnaC01g34610D	-2.3376	-1.61545	AT3G17900	unknown protein
	BnaC01g31170D	-11.0014	-2.27085	AT1G35820	unknown protein
	BnaC01g19960D	-1.66453	-1.47865	AT4G16660	heat shock protein 70 (Hsp 70) family protein
	BnaC01g16050D	-2.0774	-1.91942	AT4G24190	SHEPHERD (SHD)
	BnaAnng32550D	-1.16287	-1.40398	AT2G32120	heat-shock protein 70T-2 (HSP70T-2)
	BnaAnng31620D	-1.37836	-2.48466	AT4G18880	heat shock transcription factor A4A (HSF A4A)
	BnaA10g20610D	-1.64106	-1.57191	AT5G12020	17.6 kDa class II heat shock protein (HSP17.6II)
	BnaA10g05440D	-4.848	-3.8679	AT1G46264	heat shock transcription factor B4 (HSFB4)
	BnaA10g04210D	-2.24341	-1.72636	AT1G06460	alpha-crystallin domain 32.1 (ACD32.1)
	BnaA09g56130D	-1.25425	-1.35825	AT1G18700	DNAJ heat shock N-terminal domain-containing protein
	BnaA09g55990D	-1.9153	-1.39366	AT2G20560	DNAJ heat shock family protein
	BnaA09g43710D	-1.48981	-1.69121	AT2G20560	DNAJ heat shock family protein
	BnaA09g34140D	-3.04474	-1.91628	AT3G54220	SCARECROW (SCR)
	BnaA09g24420D	-1.18454	-1.25305	AT1G32330	heat shock transcription factor A1D (HSFA1D)
	BnaA09g19450D	-1.25627	-1.7454	AT2G04030	CR88
	BnaA08g18500D	-2.44144	-1.66334	AT1G28210	ATJ1
	BnaA05g37100D	-1.65486	-1.74591	AT3G08910	DNAJ heat shock family protein
	BnaA05g32180D	-1.57611	-1.88922	AT3G04980	DNAJ heat shock N-terminal domain-containing protein
	BnaA05g29410D	-2.57167	-3.03747	AT3G08800	ARM repeat superfamily protein
	BnaA04g24290D	-1.32339	-1.18876	AT2G42080	Chaperone DnaJ-domain superfamily protein
	BnaA04g12570D	-1.26701	-1.05116	AT2G21940	shikimate kinase 1 (SK1)
	BnaA03g46510D	-1.58597	-1.58392	AT4G24190	SHEPHERD (SHD)
	BnaA03g34290D	-1.51295	-2.27211	AT3G16770	ethylene-responsive element binding protein (EBP)
	BnaA03g17330D	-4.391	-2.53208	AT2G37630	ASYMMETRIC LEAVES 1 (AS1)
	BnaA02g00020D	-2.48373	-2.24266	AT5G09580	unknown protein
	BnaA01g27160D	-1.80518	-1.36939	AT3G17900	unknown protein
	BnaA01g13670D	-2.25262	-2.00475	AT4G24190	SHEPHERD (SHD)
	BnaA01g09820D	-1.10852	-2.02082	AT4G19020	chromomethylase 2 (CMT2)
	BnaA01g09690D	-1.2357	-2.11175	AT4G18880	heat shock transcription factor A4A (HSF A4A)
	BnaC02g36310D	-1.02766	-1.49418	AT3G26744	INDUCER OF CBF EXPRESSION 1 (ICE1)
	BnaA03g09540D	-3.07158	-2.22282	AT5G59320	lipid transfer protein 3 (LTP3)
	BnaC07g19910D	-1.43357	-1.4498	AT4G30650	Low temperature and salt responsive protein family
	BnaC01g07700D	-1.21165	-1.57285	AT4G30660	Low temperature and salt responsive protein family
	BnaCnng08080D	-2.73886	-3.39232	AT1G75220	Major facilitator superfamily protein
	BnaC06g35990D	-2.85258	-2.42081	AT1G75220	Major facilitator superfamily protein
	BnaC06g22500D	-2.53933	-2.44233	AT1G75220	Major facilitator superfamily protein
	BnaA07g31980D	-2.38209	-2.65922	AT1G75220	Major facilitator superfamily protein
	BnaA02g35880D	-2.32333	-2.48868	AT1G75220	Major facilitator superfamily protein
	BnaC06g06600D	-1.41702	-1.16822	AT4G08500	MAPK/ERK kinase kinase 1 (MEKK1)
	BnaC04g21730D	-9.07682	-8.14636	AT4G08500	MAPK/ERK kinase kinase 1 (MEKK1)
	BnaC03g30930D	-2.5094	-2.73681	AT4G08500	MAPK/ERK kinase kinase 1 (MEKK1)
	BnaA06g00700D	-1.94877	-1.97924	AT4G08500	MAPK/ERK kinase kinase 1 (MEKK1)
	BnaC09g31680D	-2.13643	-2.31105	AT5G55230	microtubule-associated proteins 65-1 (MAP65-1)
	BnaC03g14320D	-3.61034	-3.71359	AT5G55230	microtubule-associated proteins 65-1 (MAP65-1)
	BnaC02g13200D	-3.768	-2.81925	AT5G55230	microtubule-associated proteins 65-1 (MAP65-1)
	BnaA10g09470D	-2.58445	-2.57924	AT5G55230	microtubule-associated proteins 65-1 (MAP65-1)
	BnaA03g11490D	-4.73791	-4.10483	AT5G55230	microtubule-associated proteins 65-1 (MAP65-1)
	BnaA02g09170D	-1.96605	-1.08257	AT5G55230	microtubule-associated proteins 65-1 (MAP65-1)
	BnaC03g55440D	-1.36333	-2.2144	AT3G45640	mitogen-activated protein kinase 3 (MPK3)
	BnaC01g31020D	-2.61143	-5.52607	AT3G23250	myb domain protein 15 (MYB15)
	BnaA03g37010D	-2.32582	-4.10501	AT3G23250	myb domain protein 15 (MYB15)
	BnaC01g01660D	-1.76369	-1.93813	AT4G37260	myb domain protein 73 (MYB73)
	BnaA04g13540D	-2.44658	-2.62766	AT4G37260	myb domain protein 73 (MYB73)
	BnaA01g00670D	-1.51769	-2.66339	AT4G37260	myb domain protein 73 (MYB73)
	BnaC02g10620D	-1.58949	-2.37917	AT5G58670	phospholipase C1 (PLC1)
	BnaA02g07560D	-1.56515	-3.18314	AT5G58670	phospholipase C1 (PLC1)
	BnaAnng40880D	-3.42626	-4.39232	AT3G06960	PIGMENT DEFECTIVE 320 (PDE320)
	BnaC09g30900D	-4.39865	-4.12051	AT5G54590	Protein kinase superfamily protein
	BnaC03g14510D	-3.68547	-2.36233	AT5G54590	Protein kinase superfamily protein
	BnaA10g08400D	-4.27777	-3.5158	AT5G54590	Protein kinase superfamily protein
	BnaA03g11800D	-3.76927	-3.54537	AT5G54590	Protein kinase superfamily protein
	BnaA10g03290D	-1.35962	-1.98075	AT1G05260	RARE COLD INDUCIBLE GENE 3 (RCI3)
	BnaA06g28230D	-9.26835	-3.03148	AT3G05880	RARE-COLD-INDUCIBLE 2A (RCI2A)
	BnaC08g48270D	-1.21664	-1.11225	AT4G16845	REDUCED VERNALIZATION RESPONSE 2 (VRN2)
	BnaAnng38960D	-1.59368	-3.08037	AT3G55580	Regulator of chromosome condensation (RCC1) family protein
	BnaA07g11250D	-2.98976	-2.10692	AT1G20823	RING/U-box superfamily protein
	BnaA09g42730D	-1.87286	-1.98951	AT2G22300	signal responsive 1 (SR1)
	BnaC08g14540D	-1.41544	-1.44568	AT1G10760	STARCH EXCESS 1 (SEX1)
	BnaCnng52870D	-1.70349	-1.94955	AT1G19800	trigalactosyldiacylglycerol 1 (TGD1)
	BnaC08g19190D	-2.66038	-3.18048	AT1G19800	trigalactosyldiacylglycerol 1 (TGD1)
	BnaA06g38530D	-1.07044	-1.04522	AT1G19800	trigalactosyldiacylglycerol 1 (TGD1)
	BnaA10g09020D	-1.26096	-1.0983	AT1G43620	UGT80B1
	BnaCnng66020D	-2.73463	-4.85376	AT2G38470	WRKY DNA-binding protein 33 (WRKY33)
	BnaA04g22040D	-2.52367	-4.77174	AT2G38470	WRKY DNA-binding protein 33 (WRKY33)
	BnaA03g17820D	-1.35641	-3.7085	AT2G38470	WRKY DNA-binding protein 33 (WRKY33)
	BnaCnng46690D	-1.14369	-3.01129	AT4G34890	xanthine dehydrogenase 1 (XDH1)
	BnaC03g48520D	-2.76846	-2.47849	AT5G67450	zinc-finger protein 1 (ZF1)
	BnaA06g25060D	-2.91754	-1.80002	AT5G67450	zinc-finger protein 1 (ZF1)
Spring specific up
	BnaC05g30210D		1.06435	AT3G22370	alternative oxidase 1A (AOX1A)
	BnaCnng63430D		1.31469	AT3G22370	alternative oxidase 1A (AOX1A)
	BnaA03g36620D		2.22788	AT3G22370	alternative oxidase 1A (AOX1A)
	BnaA03g38950D		1.2552	AT2G15970	cold regulated 413 plasma membrane 1 (COR413-PM1)
	BnaC01g00280D		1.3704	AT4G39260	cold, circadian rhythm, and RNA binding 1 (CCR1)
	BnaC03g71900D		4.03855	AT4G25470	C-repeat/DRE binding factor 2 (CBF2)
	BnaA10g07630D		1.69423	AT5G51990	C-repeat-binding factor 4 (CBF4)
	BnaA03g46240D		2.62678	AT4G23750	cytokinin response factor 2 (CRF2)
	BnaC06g42850D		2.00705	AT3G61630	cytokinin response factor 6 (CRF6)
	BnaA05g26660D		4.66392	AT3G12490	cystatin B (CYSB)
	BnaC03g72600D		1.19307	AT2G39800	delta1-pyrroline-5-carboxylate synthase 1 (P5CS1)
	BnaA04g22810D		3.32193	AT2G39800	delta1-pyrroline-5-carboxylate synthase 1 (P5CS1)
	BnaC05g18020D		1.74221	AT1G22770	GIGANTEA (GI)
	BnaC05g29890D		1.23267	AT3G22530	unknown protein
	BnaC04g44000D		1.23378	AT2G33590	NAD(P)-binding Rossmann-fold superfamily protein
	BnaC03g26940D		1.29123	AT2G26150	heat shock transcription factor A2 (HSFA2)
	BnaAnng12070D		1.29267	AT5G02500	heat shock cognate protein 70-1 (HSC70-1)
	BnaC01g01790D		1.49185	AT4G36990	heat shock factor 4 (HSF4)
	BnaA09g55830D		1.58049	AT2G25140	casein lytic proteinase B4 (CLPB4)
	BnaA08g28630D		1.91667	AT1G06460	alpha-crystallin domain 32.1 (ACD32.1)
	BnaA09g05860D		1.93427	AT5G02500	heat shock cognate protein 70-1 (HSC70-1)
	BnaA08g25810D		1.96701	AT1G10350	DNAJ heat shock family protein
	BnaC05g43540D		2.09324	AT3G09350	Fes1A (Fes1A)
	BnaC01g39280D		2.12601	AT3G08910	DNAJ heat shock family protein
	BnaCnng06170D		2.57894	AT3G02990	heat shock transcription factor A1E (HSFA1E)
	BnaC05g20150D		3.12133	AT5G02490	Heat shock protein 70 (Hsp 70) family protein
	BnaA09g54970D		8.82443	AT3G53990	Adenine nucleotide alpha hydrolases-like superfamily protein
	BnaA03g59360D		9.22078	AT5G02500	heat shock cognate protein 70-1 (HSC70-1)
	BnaC06g30640D		9.69697	AT1G69470	unknown protein
	BnaA03g13570D		1.6888	AT5G50720	HVA22 homologue E (HVA22E)
	BnaA03g13140D		2.34485	AT5G59320	lipid transfer protein 3 (LTP3)
	BnaC04g53550D		1.06823	AT2G37760	NAD(P)-linked oxidoreductase superfamily protein
	BnaA03g17400D		1.07577	AT2G37770	NAD(P)-linked oxidoreductase superfamily protein
	BnaAnng17370D		2.85882	AT5G58670	phospholipase C1 (PLC1)
	BnaC05g30240D		8.30682	AT3G22310	putative mitochondrial RNA helicase 1 (PMH1)
	BnaA08g04090D		1.45027	AT1G46768	related to AP2 1 (RAP2.1)
	BnaC09g06200D		1.15455	AT5G63980	SAL1
	BnaC05g45310D		2.42501	AT3G06510	SENSITIVE TO FREEZING 2 (SFR2)
	BnaC01g04370D		1.97933	AT4G33950	OPEN STOMATA 1 (OST1)
	BnaAnng25950D		1.55908	AT1G10760	STARCH EXCESS 1 (SEX1)
	BnaC05g47070D		1.02097	AT3G04740	STRUWWELPETER (SWP)
	BnaC08g36060D		1.16734	AT2G20990	synaptotagmin A (SYTA)
	BnaA03g29780D		1.06904	AT3G07020	UDP-Glycosyltransferase superfamily protein
	BnaC03g11570D		1.40431	AT5G59820	RESPONSIVE TO HIGH LIGHT 41 (RHL41)
Winter specific up
	BnaA01g08510D	2.52466		AT4G17615	calcineurin B-like protein 1 (CBL1)
	BnaC04g17620D	1.01839		AT5G42900	cold regulated gene 27
	BnaC09g17270D	1.11903		AT5G42900	cold regulated gene 27
	BnaA01g01560D	1.78413		AT4G36020	cold shock domain protein 1 (CSDP1)
	BnaC03g60490D	2.03501		AT4G39260	cold, circadian rhythm, and RNA binding 1 (CCR1)
	BnaA03g40990D	1.71452		AT3G50830	cold-regulated 413-plasma membrane 2 (COR413-PM2)
	BnaC03g14960D	1.69963		AT5G53290	cytokinin response factor 3 (CRF3)
	BnaA03g12320D	2.01296		AT5G53290	cytokinin response factor 3 (CRF3)
	BnaA08g13940D	1.19192		AT4G27950	cytokinin response factor 4 (CRF4)
	BnaC03g25680D	2.32193		AT2G46310	cytokinin response factor 5 (CRF5)
	BnaC08g31500D	2.45713		AT3G61630	cytokinin response factor 6 (CRF6)
	BnaA05g26650D	2.04225		AT3G12490	cystatin B (CYSB)
	BnaAnng03730D	1.85015		AT3G50260	cooperatively regulated by ethylene and jasmonate 1 (CEJ1)
	BnaC02g42690D	1.17047		AT5G63770	diacylglycerol kinase 2 (DGK2)
	BnaA05g15330D	1.09603		AT1G51700	DOF zinc finger protein 1 (DOF1)
	BnaC08g41070D	3.83909		AT1G12610	DWARF AND DELAYED FLOWERING 1 (DDF1)
	BnaA09g47030D	5.15871		AT1G12610	DWARF AND DELAYED FLOWERING 1 (DDF1)
	BnaC01g22830D	2.05063		AT4G14690	EARLY LIGHT-INDUCIBLE PROTEIN 2 (ELIP2)
	BnaA08g26700D	1.33074		AT1G08930	EARLY RESPONSE TO DEHYDRATION 6 (ERD6)
	BnaA09g48640D	2.46674		AT1G08930	EARLY RESPONSE TO DEHYDRATION 6 (ERD6)
	BnaC08g42900D	3.1469		AT1G08930	EARLY RESPONSE TO DEHYDRATION 6 (ERD6)
	BnaC09g00720D	2.03969		AT4G03430	EMBRYO DEFECTIVE 2770 (EMB2770)
	BnaC04g01070D	1.18544		AT2G46270	G-box binding factor 3 (GBF3)
	BnaC03g04330D	3.31288		AT5G10450	G-box regulating factor 6 (GRF6)
	BnaC06g11760D	1.21774		AT4G13850	GLYCINE-RICH RNA-BINDING PROTEIN 2 (ATGRP2)
	BnaA09g22620D	1.03031		AT4G10130	DNAJ heat shock N-terminal domain-containing protein
	BnaA10g24810D	1.10368		AT3G57340	FUNCTIONS IN: unfolded protein binding, heat shock protein binding
	BnaCnng59330D	1.21328		AT3G57340	FUNCTIONS IN: unfolded protein binding, heat shock protein binding
	BnaA01g00190D	1.28931		AT4G37910	mitochondrial heat shock protein 70-1 (mtHsc70-1)
	BnaA05g01560D	1.51379		AT2G46240	BCL-2-associated athanogene 6 (BAG6)
	BnaA03g30720D	1.53382		AT3G09350	Fes1A (Fes1A)
	BnaCnng02620D	1.66166		AT5G03720	heat shock transcription factor A3 (HSFA3)
	BnaC05g16330D	2.24631		AT1G21080	DNAJ heat shock N-terminal domain-containing protein
	BnaC03g43040D	2.45943		AT3G22830	heat shock transcription factor A6B (HSFA6B)
	BnaC08g35620D	4.84551		AT2G21510	DNAJ heat shock N-terminal domain-containing protein
	BnaA06g14910D	8.59495		AT1G21080	DNAJ heat shock N-terminal domain-containing protein
	BnaCnng14280D	8.64386		AT3G22830	heat shock transcription factor A6B (HSFA6B)
	BnaAnng04440D	1.06298		AT4G08500	MAPK/ERK kinase kinase 1 (MEKK1)
	BnaC09g25280D	1.59688		AT4G08500	MAPK/ERK kinase kinase 1 (MEKK1)
	BnaA03g53870D	2.801		AT4G37260	myb domain protein 73 (MYB73)
	BnaC07g46430D	2.92572		AT4G37260	myb domain protein 73 (MYB73)
	BnaC08g21160D	1.96369		AT3G49530	NAC domain containing protein 62 (NAC062)
	BnaA10g29490D	1.21722		AT5G58670	phospholipase C1 (PLC1)
	BnaAnng36640D	1.34972		AT5G58670	phospholipase C1 (PLC1)
	BnaC08g16970D	1.36618		AT1G16670	Protein kinase superfamily protein
	BnaA08g23560D	1.72353		AT1G16670	Protein kinase superfamily protein
	BnaC08g44140D	8.97537		AT1G05260	RARE COLD INDUCIBLE GENE 3 (RCI3)
	BnaAnng40580D	1.19614		AT1G13260	related to ABI3/VP1 1 (RAV1)
	BnaC07g15130D	2.41593		AT1G20823	RING/U-box superfamily protein
	BnaC04g34480D	2.04567		AT5G37770	TOUCH 2 (TCH2)
	BnaC04g06800D	1.60138		AT2G38470	WRKY DNA-binding protein 33 (WRKY33)
	BnaC07g27590D	2.47508		AT2G38470	WRKY DNA-binding protein 33 (WRKY33)
Spring specific down
	BnaA05g29500D		-2.22649	AT3G08720	Arabidopsis thaliana protein kinase 19 (ATPK19)
	BnaC05g43850D		-1.99423	AT3G08720	Arabidopsis thaliana protein kinase 19 (ATPK19)
	BnaA03g42410D		-3.26127	AT4G16160	ATOEP16-2
	BnaA01g08510D		-1.45927	AT4G17615	calcineurin B-like protein 1 (CBL1)
	BnaC01g10210D		-3.19163	AT4G17615	calcineurin B-like protein 1 (CBL1)
	BnaA02g10340D		-2.13598	AT5G53290	cytokinin response factor 3 (CRF3)
	BnaA03g12320D		-1.78207	AT5G53290	cytokinin response factor 3 (CRF3)
	BnaC02g14430D		-2.54189	AT5G53290	cytokinin response factor 3 (CRF3)
	BnaA03g48910D		-2.00972	AT4G27950	cytokinin response factor 4 (CRF4)
	BnaA08g13940D		-1.89756	AT4G27950	cytokinin response factor 4 (CRF4)
	BnaA03g18900D		-1.38658	AT2G40140	CZF1
	BnaC03g22460D		-2.33832	AT2G40140	CZF1
	BnaC08g44600D		-8.6677	AT1G06080	delta 9 desaturase 1 (ADS1)
	BnaA08g01830D		-1.41329	AT1G51700	DOF zinc finger protein 1 (DOF1)
	BnaC03g77910D		-1.10454	AT1G51700	DOF zinc finger protein 1 (DOF1)
	BnaAnng36290D		-2.09815	AT1G12610	DWARF AND DELAYED FLOWERING 1 (DDF1)
	BnaCnng31550D		-4.6926	AT1G12610	DWARF AND DELAYED FLOWERING 1 (DDF1)
	BnaC09g20100D		-2.84473	AT5G47230	ethylene responsive element binding factor 5 (ERF5)
	BnaC03g04330D		-2.52002	AT5G10450	G-box regulating factor 6 (GRF6)
	BnaAnng35580D		-1.16893	AT2G21660	GLYCINE RICH PROTEIN 7 (ATGRP7)
	BnaC09g05120D		-1.03008	AT5G61030	glycine-rich RNA-binding protein 3 (GR-RBP3)
	BnaA01g26800D		-1.73213	AT3G18350	Plant protein of unknown function (DUF639)
	BnaA01g31420D		-1.80276	AT3G10800	BZIP28
	BnaA03g03740D		-2.2076	AT5G12020	17.6 kDa class II heat shock protein (HSP17.6II)
	BnaA03g33070D		-1.30367	AT3G13860	heat shock protein 60-3A (HSP60-3A)
	BnaA03g36800D		-1.82742	AT3G22830	heat shock transcription factor A6B (HSFA6B)
	BnaA04g04890D		-1.00699	AT3G53110	LOW EXPRESSION OF OSMOTICALLY RESPONSIVE GENES 4 (LOS4)
	BnaA05g15790D		-1.01091	AT1G50500	HEAT-INTOLERANT 1 (HIT1)
	BnaA05g29880D		-1.00648	AT3G07770	HEAT SHOCK PROTEIN 89.1 (Hsp89.1)
	BnaA05g31000D		-1.23287	AT3G06340	DNAJ heat shock N-terminal domain-containing protein
	BnaA06g20720D		-1.2536	AT3G47940	DNAJ heat shock family protein
	BnaA07g26740D		-1.08799	AT1G67970	heat shock transcription factor A8 (HSFA8)
	BnaA07g31420D		-1.22977	AT1G74310	heat shock protein 101 (HSP101)
	BnaA08g23680D		-1.51332	AT1G16030	heat shock protein 70B (Hsp70b)
	BnaA09g14490D		-2.07218	AT1G59725	DNAJ heat shock family protein
	BnaA09g24670D		-1.11814	AT3G10800	BZIP28
	BnaA09g40540D		-1.84114	AT2G26330	ERECTA (ER)
	BnaAnng15230D		-1.42346	AT3G02990	heat shock transcription factor A1E (HSFA1E)
	BnaAnng35210D		-1.07626	AT1G50500	HEAT-INTOLERANT 1 (HIT1)
	BnaAnng36200D		-1.85863	AT4G36990	heat shock factor 4 (HSF4)
	BnaC01g22260D		-1.53343	AT4G15802	heat shock factor binding protein (HSBP)
	BnaC01g34240D		-1.30057	AT3G18350	Plant protein of unknown function (DUF639)
	BnaC01g43960D		-1.69922	AT3G17210	heat stable protein 1 (HS1)
	BnaC02g04180D		-2.43962	AT5G12020	17.6 kDa class II heat shock protein (HSP17.6II)
	BnaC02g35320D		-1.87447	AT2G04030	CR88
	BnaC03g38160D		-2.15748	AT3G13860	heat shock protein 60-3A (HSP60-3A)
	BnaC03g46700D		-1.05685	AT5G02490	Heat shock protein 70 (Hsp 70) family protein
	BnaC04g28450D		-2.50663	AT3G51910	heat shock transcription factor A7A (HSFA7A)
	BnaC06g14990D		-1.35991	AT3G53990	Adenine nucleotide alpha hydrolases-like superfamily protein
	BnaC08g01540D		-1.17304	AT1G05850	POM-POM1 (POM1)
	BnaC08g32980D		-1.21351	AT2G26330	ERECTA (ER)
	BnaC09g22180D		-1.04302	AT2G04030	CR88
	BnaCnng13770D		-1.77193	AT2G21940	shikimate kinase 1 (SK1)
	BnaCnng27470D		-10.2288	AT3G16770	ethylene-responsive element binding protein (EBP)
	BnaCnng56320D		-1.36912	AT4G36990	heat shock factor 4 (HSF4)
	BnaUnng01050D		-9.81378	AT4G36990	heat shock factor 4 (HSF4)
	BnaC09g46500D		-1.41847	AT5G10140	K-box region and MADS-box transcription factor family protein
	BnaC09g46540D		-1.74083	AT5G10140	K-box region and MADS-box transcription factor family protein
	BnaC03g12050D		-2.66297	AT5G59320	lipid transfer protein 3 (LTP3)
	BnaC02g40230D		-2.44904	AT1G56070	LOW EXPRESSION OF OSMOTICALLY RESPONSIVE GENES 1 (LOS1)
	BnaCnng26590D		-3.1112	AT1G56070	LOW EXPRESSION OF OSMOTICALLY RESPONSIVE GENES 1 (LOS1)
	BnaC04g36850D		-1.49296	AT2G24040	Low temperature and salt responsive protein family
	BnaA07g21790D		-1.1839	AT1G75220	Major facilitator superfamily protein
	BnaAnng30700D		-1.71689	AT4G08500	MAPK/ERK kinase kinase 1 (MEKK1)
	BnaC03g28150D		-1.00328	AT4G08500	MAPK/ERK kinase kinase 1 (MEKK1)
	BnaA06g18440D		-1.7345	AT3G45640	mitogen-activated protein kinase 3 (MPK3)
	BnaA01g23930D		-9.31439	AT3G23250	myb domain protein 15 (MYB15)
	BnaC07g16030D		-2.03452	AT5G67300	myb domain protein r1 (MYBR1)
	BnaA03g53870D		-3.64981	AT4G37260	myb domain protein 73 (MYB73)
	BnaC04g35730D		-8.60733	AT4G37260	myb domain protein 73 (MYB73)
	BnaA06g15870D		-2.08733	AT3G49530	NAC domain containing protein 62 (NAC062)
	BnaA05g06810D		-1.79949	AT2G37770	NAD(P)-linked oxidoreductase superfamily protein
	BnaA09g56220D		-1.54475	AT1G16670	Protein kinase superfamily protein
	BnaC08g38280D		-8.50515	AT1G16670	Protein kinase superfamily protein
	BnaC01g28720D		-8.47843	AT1G60650	RNA-binding (RRM/RBD/RNP motifs) family protein with retrovirus zinc finger-like domain
	BnaA04g12770D		-1.14	AT2G22300	signal responsive 1 (SR1)
	BnaC04g34700D		-1.25917	AT2G22300	signal responsive 1 (SR1)
	BnaAnng10600D		-1.07517	AT3G04740	STRUWWELPETER (SWP)
	BnaA01g32510D		-1.54911	AT3G07020	UDP-Glycosyltransferase superfamily protein
	BnaA05g30520D		-1.00994	AT3G07020	UDP-Glycosyltransferase superfamily protein
	BnaA05g34850D		-2.76509	AT2G38470	WRKY DNA-binding protein 33 (WRKY33)
	BnaC03g21360D		-3.42752	AT2G38470	WRKY DNA-binding protein 33 (WRKY33)
	BnaC04g06800D		-3.29903	AT2G38470	WRKY DNA-binding protein 33 (WRKY33)
	BnaC07g27590D		-1.23769	AT2G38470	WRKY DNA-binding protein 33 (WRKY33)
	BnaA08g18790D		-1.25991	AT1G27730	salt tolerance zinc finger (STZ)
	BnaA09g27780D		-1.45355	AT1G27730	salt tolerance zinc finger (STZ)
	BnaC07g11700D		-4.07056	AT1G27730	salt tolerance zinc finger (STZ)
	BnaC09g07240D		-1.96153	AT5G67450	zinc-finger protein 1 (ZF1)
Winter specific down
	BnaAnng41100D	-1.39789		AT1G36160	acetyl-CoA carboxylase 1 (ACC1)
	BnaC08g06560D	-1.20675		AT1G36160	acetyl-CoA carboxylase 1 (ACC1)
	BnaC08g47680D	-1.20767		AT4G16160	ATOEP16-2
	BnaA02g28060D	-1.41979		AT3G26420	ATRZ-1A
	BnaA05g01990D	-3.12293		AT2G41130	basic helix-loop-helix (bHLH) DNA-binding superfamily protein
	BnaC03g23140D	-2.48543		AT2G41130	basic helix-loop-helix (bHLH) DNA-binding superfamily protein
	BnaA05g09090D	-1.73755		AT5G12250	beta-6 tubulin (TUB6)
	BnaA09g06760D	-1.19062		AT5G64220	Calmodulin-binding transcription activator protein with CG-1 and Ankyrin domains
	BnaC08g48230D	-1.06795		AT4G16150	calmodulin binding
	BnaC05g22410D	-1.08347		AT1G29390	cold regulated 314 thylakoid membrane 2 (COR314-TM2)
	BnaAnng08360D	-1.41098		AT4G36020	cold shock domain protein 1 (CSDP1)
	BnaC04g16180D	-2.60823		AT2G17870	cold shock domain protein 3 (CSP3)
	BnaC04g47450D	-1.16287		AT2G40880	cystatin A (CYSA)
	BnaC04g47470D	-1.12447		AT2G40880	cystatin A (CYSA)
	BnaC04g46630D	-1.29073		AT2G39800	delta1-pyrroline-5-carboxylate synthase 1 (P5CS1)
	BnaA05g01260D	-1.6592		AT2G46590	DOF AFFECTING GERMINATION 2 (DAG2)
	BnaC05g06500D	-1.34598		AT1G08930	EARLY RESPONSE TO DEHYDRATION 6 (ERD6)
	BnaA05g28590D	-2.38247		AT3G55990	ESKIMO 1 (ESK1)
	BnaA07g16700D	-1.49426		AT3G55990	ESKIMO 1 (ESK1)
	BnaC06g15710D	-1.5518		AT3G55990	ESKIMO 1 (ESK1)
	BnaC08g26920D	-1.83007		AT3G55990	ESKIMO 1 (ESK1)
	BnaA09g07280D	-1.01166		AT5G67590	FROSTBITE1 (FRO1)
	BnaA07g03930D	-1.20317		AT5G37500	gated outwardly-rectifying K+ channel (GORK)
	BnaC02g00320D	-1.00348		AT5G10450	G-box regulating factor 6 (GRF6)
	BnaA09g05570D	-1.67481		AT5G61030	glycine-rich RNA-binding protein 3 (GR-RBP3)
	BnaA04g22790D	-1.43949		AT2G39810	HIGH EXPRESSION OF OSMOTICALLY RESPONSIVE GENES 1 (HOS1)
	BnaA09g07470D	-1.12177		AT5G67320	high expression of osmotically responsive genes 15 (HOS15)
	BnaAnng14560D	-3.89482		AT5G67320	high expression of osmotically responsive genes 15 (HOS15)
	BnaA01g17140D	-1.4468		AT4G16660	heat shock protein 70 (Hsp 70) family protein
	BnaA01g27570D	-1.03722		AT3G16770	ethylene-responsive element binding protein (EBP)
	BnaA03g14610D	-2.14384		AT2G31580	tRNAHis guanylyltransferase
	BnaA03g24840D	-1.69359		AT4G11660	AT-HSFB2B
	BnaA04g12800D	-1.14225		AT2G22360	DNAJ heat shock family protein
	BnaA04g20530D	-1.51457		AT2G35540	DNAJ heat shock N-terminal domain-containing protein
	BnaA05g02630D	-3.48266		AT2G42080	Chaperone DnaJ-domain superfamily protein
	BnaA05g03090D	-1.03934		AT2G42750	DNAJ heat shock N-terminal domain-containing protein
	BnaA05g06890D	-1.07101		AT2G37630	ASYMMETRIC LEAVES 1 (AS1)
	BnaA06g36450D	-1.05308		AT5G43940	sensitive to hot temperatures 5 (HOT5)
	BnaA07g05600D	-2.12537		AT3G24500	multiprotein bridging factor 1C (MBF1C)
	BnaA07g33250D	-1.82463		AT1G77020	DNAJ heat shock N-terminal domain-containing protein
	BnaA08g08940D	-1.69371		AT4G18880	heat shock transcription factor A4A (HSF A4A)
	BnaA09g16810D	-1.04708		AT5G43940	sensitive to hot temperatures 5 (HOT5)
	BnaAnng22000D	-2.93074		AT2G04030	CR88
	BnaAnng22010D	-3.09433		AT2G04030	CR88
	BnaAnng23890D	-1.1078		AT4G02100	Heat shock protein DnaJ with tetratricopeptide repeat
	BnaAnng28460D	-1.96024		AT3G08910	DNAJ heat shock family protein
	BnaC01g11370D	-1.59243		AT4G18880	heat shock transcription factor A4A (HSF A4A)
	BnaC01g11520D	-1.10118		AT4G19020	chromomethylase 2 (CMT2)
	BnaC01g35070D	-1.34816		AT3G16770	ethylene-responsive element binding protein (EBP)
	BnaC01g43050D	-1.51583		AT1G56420	unknown protein
	BnaC03g36300D	-1.50115		AT3G08910	DNAJ heat shock family protein
	BnaC03g40300D	-1.18873		AT3G17900	unknown protein
	BnaC03g58400D	-2.38247		AT1G28210	ATJ1
	BnaC03g73070D	-2.57897		AT4G11660	AT-HSFB2B
	BnaC04g01940D	-1.01164		AT2G41520	Heat shock protein DnaJ with tetratricopeptide repeat
	BnaC04g27610D	-1.15491		AT3G53110	LOW EXPRESSION OF OSMOTICALLY RESPONSIVE GENES 4 (LOS4)
	BnaC04g34720D	-1.33234		AT2G22360	DNAJ heat shock family protein
	BnaC04g48090D	-1.76846		AT2G42080	Chaperone DnaJ-domain superfamily protein
	BnaC04g52570D	-1.56598		AT2G42750	DNAJ heat shock N-terminal domain-containing protein
	BnaC05g26660D	-1.10602		AT1G50500	HEAT-INTOLERANT 1 (HIT1)
	BnaC05g43650D	-1.31197		AT3G08910	DNAJ heat shock family protein
	BnaC05g45480D	-1.81209		AT3G06340	DNAJ heat shock N-terminal domain-containing protein
	BnaC05g46850D	-2.2584		AT3G04980	DNAJ heat shock N-terminal domain-containing protein
	BnaC06g00310D	-5.71699		AT1G46264	heat shock transcription factor B4 (HSFB4)
	BnaC06g23110D	-1.00681		AT1G74310	heat shock protein 101 (HSP101)
	BnaC07g07150D	-1.20594		AT3G24500	multiprotein bridging factor 1C (MBF1C)
	BnaC08g37060D	-1.10808		AT1G18700	DNAJ heat shock N-terminal domain-containing protein
	BnaC09g17760D	-1.35634		AT5G43940	sensitive to hot temperatures 5 (HOT5)
	BnaC05g09250D	-1.58981		AT1G12860	SCREAM 2 (SCRM2)
	BnaA07g24790D	-2.32654		AT1G68130	indeterminate(ID)-domain 14 (IDD14)
	BnaA07g26850D	-1.1107		AT1G68130	indeterminate(ID)-domain 14 (IDD14)
	BnaC06g26120D	-2.11089		AT1G68130	indeterminate(ID)-domain 14 (IDD14)
	BnaA03g13630D	-1.56809		AT5G10140	K-box region and MADS-box transcription factor family protein
	BnaA10g22080D	-1.04396		AT5G10140	K-box region and MADS-box transcription factor family protein
	BnaC03g71570D	-5.30114		AT5G59320	lipid transfer protein 3 (LTP3)
	BnaC04g44950D	-2.52509		AT1G56070	LOW EXPRESSION OF OSMOTICALLY RESPONSIVE GENES 1 (LOS1)
	BnaA07g17450D	-4.2647		AT2G36530	LOW EXPRESSION OF OSMOTICALLY RESPONSIVE GENES 2 (LOS2)
	BnaC02g18240D	-1.1848		AT4G30660	Low temperature and salt responsive protein family
	BnaC09g25820D	-2.42196		AT4G29810	MAP kinase kinase 2 (MKK2)
	BnaA08g15610D	-2.1193		AT4G37260	myb domain protein 73 (MYB73)
	BnaC03g61550D	-1.35819		AT4G37260	myb domain protein 73 (MYB73)
	BnaC03g72060D	-3.52607		AT2G37770	NAD(P)-linked oxidoreductase superfamily protein
	BnaA02g14680D	-1.1122		AT1G69270	receptor-like protein kinase 1 (RPK1)
	BnaCnng26240D	-1.33713		AT1G69270	receptor-like protein kinase 1 (RPK1)
	BnaA08g08130D	-1.30176		AT4G16845	REDUCED VERNALIZATION RESPONSE 2 (VRN2)
	BnaC08g10770D	-2.91754		AT4G16845	REDUCED VERNALIZATION RESPONSE 2 (VRN2)
	BnaA05g19380D	-3.9251		AT3G55580	Regulator of chromosome condensation (RCC1) family protein
	BnaCnng43480D	-2.79956		AT3G55580	Regulator of chromosome condensation (RCC1) family protein
	BnaA09g06680D	-1.91809		AT5G63980	SAL1
	BnaA01g32790D	-1.72732		AT3G06510	SENSITIVE TO FREEZING 2 (SFR2)
	BnaA09g20140D	-2.28951		AT4G04920	SENSITIVE TO FREEZING 6 (SFR6)
	BnaCnng69220D	-1.69832		AT4G04920	SENSITIVE TO FREEZING 6 (SFR6)
	BnaCnng73230D	-1.23924		AT4G04920	SENSITIVE TO FREEZING 6 (SFR6)
	BnaA09g47750D	-2.32045		AT1G10760	STARCH EXCESS 1 (SEX1)
	BnaA09g05610D	-1.81899		AT5G61150	VERNALIZATION INDEPENDENCE 4 (VIP4)
	BnaAnng06810D	-1.08758		AT5G61150	VERNALIZATION INDEPENDENCE 4 (VIP4)
	BnaC02g42040D	-1.01991		AT5G61150	VERNALIZATION INDEPENDENCE 4 (VIP4)
	BnaA09g00610D	-1.71103		AT4G34890	xanthine dehydrogenase 1 (XDH1)
	BnaC01g03570D	-1.19378		AT4G34890	xanthine dehydrogenase 1 (XDH1)
	BnaA06g36830D	-1.79796		AT5G43170	zinc-finger protein 3 (ZF3)
