# Supplementary material for: Characterization of cold stress responses in different rapeseed ecotypes based on metabolomics and transcriptomics analyses
Source: PeerJ. 2020 Mar 31;8:e8704. doi: 10.7717/peerj.8704 (PMC7120054; doi:10.7717/peerj.8704)
Supplement: Supplemental Information 10 [file peerj-08-8704-s010.xlsx]

## Sheet: S8
Table S8 Significantly enriched pathways of DEGs in winter and spring B. napus ecotypes after cold stress.
Groups	KEGG_A_class	KEGG_B_class	Pathways	DEGs	All (20957)	Qvalue	Pathway ID	Genes
Comon up
	Organismal Systems	Environmental adaptation	Circadian rhythm - plant	33	151	7.40063e-16	ko04712	BnaA01g27940D;BnaA02g32550D;BnaA03g21350D;BnaA03g34610D;BnaA04g26750D;BnaA05g01050D;BnaA05g01090D;BnaA05g01470D;BnaA05g22650D;BnaA06g21870D;BnaA06g26980D;BnaA06g37850D;BnaA09g04840D;BnaA09g05170D;BnaA10g00780D;BnaAnng17890D;BnaAnng24480D;BnaAnng29770D;BnaAnng38870D;BnaAnng39160D;BnaC01g35040D;BnaC02g05070D;BnaC02g06280D;BnaC03g00040D;BnaC04g00640D;BnaC04g01130D;BnaC05g00840D;BnaC05g35930D;BnaC07g…
	Metabolism	Metabolism of terpenoids and polyketides	Carotenoid biosynthesis	19	123	1.74899e-06	ko00906	XLOC_090608;BnaA01g14940D;BnaA01g29390D;BnaA03g33390D;BnaA03g43960D;BnaA05g20890D;BnaA07g12170D;BnaA09g17560D;BnaA09g51010D;BnaAnng05520D;BnaAnng27240D;BnaC01g11650D;BnaC01g17610D;BnaC02g07100D;BnaC05g33590D;BnaC05g42860D;BnaC07g35800D;BnaCnng32080D;BnaCnng32090D
	Metabolism	Carbohydrate metabolism	Amino sugar and nucleotide sugar metabolism	45	558	2.63288e-06	ko00520	XLOC_034339;XLOC_060783;XLOC_086701;BnaA01g33130D;BnaA03g05430D;BnaA03g05580D;BnaA03g20340D;BnaA03g27800D;BnaA03g50170D;BnaA04g16090D;BnaA05g03430D;BnaA05g09030D;BnaA05g14410D;BnaA07g06190D;BnaA07g18060D;BnaA08g27100D;BnaA09g12250D;BnaA09g25900D;BnaA09g31740D;BnaA10g05030D;BnaA10g18590D;BnaA10g18700D;BnaA10g18710D;BnaAnng16810D;BnaC03g06960D;BnaC03g07130D;BnaC03g24360D;BnaC03g32850D;BnaC03g74220D…
	Organismal Systems	Environmental adaptation	Plant-pathogen interaction	59	862	6.20867e-06	ko04626	BnaA01g11790D;BnaA01g24320D;BnaA01g25260D;BnaA01g31850D;BnaA02g01440D;BnaA02g08820D;BnaA02g35440D;BnaA03g10710D;BnaA03g11140D;BnaA03g11150D;BnaA03g13820D;BnaA03g18230D;BnaA03g19320D;BnaA03g40940D;BnaA04g01660D;BnaA04g14070D;BnaA04g17420D;BnaA05g11820D;BnaA05g12160D;BnaA06g13080D;BnaA07g16960D;BnaA07g18330D;BnaA07g21300D;BnaA07g32970D;BnaA07g36180D;BnaA08g22720D;BnaA09g03360D;BnaA09g11870D;BnaA10g…
	Environmental Information Processing	Signal transduction	Phosphatidylinositol signaling system	30	330	2.16041e-05	ko04070	BnaA03g02290D;BnaA03g19320D;BnaA06g22880D;BnaA06g23130D;BnaA07g16960D;BnaA09g03360D;BnaA09g14090D;BnaA09g35480D;BnaA10g05120D;BnaAnng06320D;BnaC01g39480D;BnaC01g39540D;BnaC02g01400D;BnaC03g03330D;BnaC03g12400D;BnaC03g23130D;BnaC03g50270D;BnaC03g50590D;BnaC03g50600D;BnaC04g24860D;BnaC05g08390D;BnaC05g44000D;BnaC06g00050D;BnaC06g02580D;BnaC09g02710D;BnaC09g48570D;BnaCnng20380D;BnaCnng23510D;BnaCnng…
	Metabolism	Carbohydrate metabolism	Inositol phosphate metabolism	25	252	2.99565e-05	ko00562	BnaA01g34710D;BnaA04g12720D;BnaA06g05800D;BnaA06g23130D;BnaA07g00980D;BnaA09g14090D;BnaA09g35480D;BnaA09g42760D;BnaA10g05120D;BnaC01g00680D;BnaC01g39480D;BnaC01g39540D;BnaC03g12400D;BnaC03g50270D;BnaC04g34650D;BnaC05g07350D;BnaC05g08390D;BnaC05g44000D;BnaC06g00050D;BnaC06g02580D;BnaC08g35240D;BnaC09g48570D;BnaCnng23510D;BnaCnng66380D;BnaCnng67650D
	Cellular Processes	Transport and catabolism	Endocytosis	50	761	9.60011e-05	ko04144	BnaA01g02040D;BnaA01g27890D;BnaA01g28530D;BnaA01g28540D;BnaA01g30490D;BnaA03g32320D;BnaA05g29760D;BnaA06g17850D;BnaA06g25550D;BnaA07g03060D;BnaA07g09950D;BnaA08g20460D;BnaA08g20750D;BnaA09g05850D;BnaA09g14090D;BnaA09g29090D;BnaA09g29110D;BnaA09g39660D;BnaA10g00650D;BnaA10g27060D;BnaA10g27070D;BnaAnng08350D;BnaAnng33370D;BnaC01g18960D;BnaC01g27590D;BnaC01g27600D;BnaC01g35830D;BnaC01g38510D;BnaC01g…
	Metabolism	Biosynthesis of other secondary metabolites	Flavonoid biosynthesis	14	103	0.000131632	ko00941	BnaA04g17560D;BnaA04g17570D;BnaA09g34840D;BnaA10g22800D;BnaC01g22120D;BnaC02g05070D;BnaC02g42580D;BnaC04g41120D;BnaC04g41130D;BnaC08g26020D;BnaC09g17150D;BnaC09g43250D;BnaC09g47360D;BnaCnng04830D
	Metabolism	Carbohydrate metabolism	Starch and sucrose metabolism	55	894	0.000172976	ko00500	XLOC_034339;XLOC_055185;XLOC_055186;XLOC_060783;XLOC_086701;BnaA01g17940D;BnaA01g34060D;BnaA02g34580D;BnaA03g05430D;BnaA03g08110D;BnaA03g42940D;BnaA03g50170D;BnaA04g25720D;BnaA06g24090D;BnaA06g26820D;BnaA07g05100D;BnaA07g05110D;BnaA07g05790D;BnaA07g06190D;BnaA07g18060D;BnaA08g00680D;BnaA08g20280D;BnaA10g03060D;BnaA10g05030D;BnaA10g14710D;BnaA10g18700D;BnaA10g18710D;BnaAnng20820D;BnaC01g14030D;Bna…
	Metabolism	Amino acid metabolism	Arginine and proline metabolism	23	257	0.000251671	ko00330	BnaA01g02880D;BnaA02g12280D;BnaA03g27900D;BnaA03g53010D;BnaA05g05760D;BnaA08g10990D;BnaA08g20300D;BnaA09g35230D;BnaA10g18360D;BnaA10g24140D;BnaAnng38530D;BnaC01g04140D;BnaC02g45540D;BnaC03g32940D;BnaC03g65810D;BnaC04g05620D;BnaC06g17070D;BnaC07g45200D;BnaC07g50830D;BnaC08g06430D;BnaC08g26550D;BnaC09g41900D;BnaCnng20650D
	Metabolism	Biosynthesis of other secondary metabolites	Phenylpropanoid biosynthesis	41	676	0.00237056	ko00940	BnaA01g24990D;BnaA01g34060D;BnaA02g04550D;BnaA03g11990D;BnaA03g37390D;BnaA03g51010D;BnaA04g04830D;BnaA04g17560D;BnaA04g17570D;BnaA04g21230D;BnaA04g21240D;BnaA04g25720D;BnaA05g07370D;BnaA05g19630D;BnaA05g19760D;BnaA07g05100D;BnaA07g05110D;BnaA08g15930D;BnaA09g33560D;BnaA10g24240D;BnaC01g22120D;BnaC01g31890D;BnaC01g40610D;BnaC02g02350D;BnaC03g14720D;BnaC03g33490D;BnaC03g61120D;BnaC04g03740D;BnaC04g…
	Metabolism	Carbohydrate metabolism	Glycolysis / Gluconeogenesis	30	464	0.00524555	ko00010	BnaA01g02880D;BnaA01g20680D;BnaA05g25500D;BnaA05g33200D;BnaA05g35800D;BnaA06g05800D;BnaA06g24600D;BnaA07g33310D;BnaA08g16820D;BnaA08g20300D;BnaA10g05030D;BnaA10g09270D;BnaA10g10590D;BnaAnng32070D;BnaC01g04140D;BnaC01g13540D;BnaC01g25930D;BnaC04g33570D;BnaC05g07350D;BnaC05g28630D;BnaC06g01220D;BnaC06g14270D;BnaC06g42870D;BnaC08g06430D;BnaC08g13860D;BnaC08g35820D;BnaC09g31460D;BnaCnng03960D;BnaCnng…
	Metabolism	Lipid metabolism	Glycerophospholipid metabolism	26	384	0.00563801	ko00564	BnaA01g28530D;BnaA01g28540D;BnaA03g02290D;BnaA04g02290D;BnaA06g22880D;BnaA07g29470D;BnaA09g54840D;BnaA10g00370D;BnaA10g01090D;BnaAnng06320D;BnaAnng14270D;BnaC01g35830D;BnaC01g35920D;BnaC02g01400D;BnaC03g03330D;BnaC03g34280D;BnaC03g50590D;BnaC03g50600D;BnaC05g00230D;BnaC05g00450D;BnaC05g04490D;BnaC05g09920D;BnaC06g32670D;BnaC07g29580D;BnaC08g25880D;BnaC09g01080D
	Metabolism	Carbohydrate metabolism	Ascorbate and aldarate metabolism	14	159	0.00813019	ko00053	BnaA01g02880D;BnaA01g15950D;BnaA02g05230D;BnaA07g00980D;BnaA08g20300D;BnaA09g49190D;BnaA10g18700D;BnaAnng15470D;BnaC01g04140D;BnaC01g19060D;BnaC08g06430D;BnaC08g43490D;BnaC09g36790D;BnaC09g42430D
	Metabolism	Global and Overview	Biosynthesis of secondary metabolites	190	4613	0.00846879	ko01110	XLOC_090608;BnaA01g02440D;BnaA01g02510D;BnaA01g02880D;BnaA01g14940D;BnaA01g15950D;BnaA01g20680D;BnaA01g28530D;BnaA01g28540D;BnaA01g29390D;BnaA01g34060D;BnaA01g34770D;BnaA01g35850D;BnaA01g36920D;BnaA02g03370D;BnaA02g04550D;BnaA03g02290D;BnaA03g06520D;BnaA03g11990D;BnaA03g15920D;BnaA03g33390D;BnaA03g34510D;BnaA03g48400D;BnaA03g51010D;BnaA04g02290D;BnaA04g02330D;BnaA04g04830D;BnaA04g06460D;BnaA04g17…
	Metabolism	Lipid metabolism	Glycerolipid metabolism	19	257	0.00846879	ko00561	BnaA01g02880D;BnaA01g05080D;BnaA03g02290D;BnaA04g02290D;BnaA06g22880D;BnaA08g20300D;BnaA10g00370D;BnaA10g01090D;BnaAnng06320D;BnaAnng14270D;BnaC01g04140D;BnaC02g01400D;BnaC03g03330D;BnaC03g50590D;BnaC03g50600D;BnaC05g00450D;BnaC05g04490D;BnaC08g06430D;BnaC09g01080D
	Metabolism	Amino acid metabolism	Phenylalanine metabolism	15	182	0.00846879	ko00360	BnaA04g04830D;BnaA04g17560D;BnaA04g17570D;BnaA04g21230D;BnaA04g21240D;BnaA05g07370D;BnaA05g19760D;BnaA09g33560D;BnaC04g08190D;BnaC04g41120D;BnaC04g41130D;BnaC05g42780D;BnaC08g24360D;BnaCnng04830D;BnaCnng52250D
	Metabolism	Amino acid metabolism	Cysteine and methionine metabolism	28	447	0.00846879	ko00270	BnaA01g23510D;BnaA01g36920D;BnaA02g22360D;BnaA03g27900D;BnaA03g34510D;BnaA03g57570D;BnaA04g06420D;BnaA05g07530D;BnaA07g33490D;BnaA08g26010D;BnaA10g00470D;BnaA10g16880D;BnaA10g18360D;BnaAnng38530D;BnaC01g01270D;BnaC01g40620D;BnaC01g43540D;BnaC03g32940D;BnaC03g33530D;BnaC03g39970D;BnaC04g08360D;BnaC04g35390D;BnaC05g00530D;BnaC08g13960D;BnaC09g39920D;BnaC09g41900D;BnaCnng16700D;BnaCnng19320D
	Metabolism	Metabolism of other amino acids	beta-Alanine metabolism	15	190	0.0120646	ko00410	BnaA01g02880D;BnaA02g12280D;BnaA03g06520D;BnaA05g22440D;BnaA06g19240D;BnaA07g25530D;BnaA08g20300D;BnaAnng27540D;BnaC01g04140D;BnaC02g45540D;BnaC06g17070D;BnaC06g27330D;BnaC07g50830D;BnaC08g06430D;BnaC09g40620D
	Metabolism	Global and Overview	Degradation of aromatic compounds	5	34	0.0297399	ko01220	BnaA04g17560D;BnaA04g17570D;BnaC01g13540D;BnaC04g41120D;BnaC04g41130D
	Metabolism	Biosynthesis of other secondary metabolites	Flavone and flavonol biosynthesis	2	4	0.0345435	ko00944	BnaA02g03370D;BnaC02g06990D
	Metabolism	Global and Overview	Metabolic pathways	300	7938	0.0354769	ko01100	XLOC_025401;XLOC_031340;XLOC_034339;XLOC_055185;XLOC_055186;XLOC_060783;XLOC_086701;XLOC_090608;BnaA01g02440D;BnaA01g02510D;BnaA01g02880D;BnaA01g05080D;BnaA01g10530D;BnaA01g14940D;BnaA01g15950D;BnaA01g18440D;BnaA01g20680D;BnaA01g23510D;BnaA01g28530D;BnaA01g28540D;BnaA01g29390D;BnaA01g34060D;BnaA01g34710D;BnaA01g34770D;BnaA01g35850D;BnaA01g36920D;BnaA02g03370D;BnaA02g04550D;BnaA02g05230D;BnaA02g14…
	Metabolism	Carbohydrate metabolism	Butanoate metabolism	8	86	0.0412758	ko00650	BnaA03g06520D;BnaA03g22610D;BnaA06g19240D;BnaA07g25530D;BnaAnng27540D;BnaC03g26640D;BnaC06g27330D;BnaC09g40620D
Common down
	Metabolism	Global and Overview	Metabolic pathways	1356	7938	4.79423e-21	ko01100	XLOC_001796;XLOC_002922;XLOC_004356;XLOC_005724;XLOC_009808;XLOC_010448;XLOC_010693;XLOC_011576;XLOC_013445;XLOC_015971;XLOC_016243;XLOC_019825;XLOC_025156;XLOC_028975;XLOC_030952;XLOC_035675;XLOC_035912;XLOC_036041;XLOC_039986;XLOC_041648;XLOC_043384;XLOC_046081;XLOC_057147;XLOC_063321;XLOC_067485;XLOC_068333;XLOC_072882;XLOC_073574;XLOC_075150;XLOC_075151;XLOC_077464;XLOC_078570;XLOC_078654;XLO…
	Metabolism	Global and Overview	Biosynthesis of secondary metabolites	805	4613	4.25743e-12	ko01110	XLOC_001796;XLOC_005724;XLOC_010693;XLOC_011576;XLOC_015971;XLOC_016243;XLOC_028975;XLOC_035675;XLOC_035912;XLOC_037682;XLOC_041648;XLOC_043384;XLOC_057147;XLOC_067485;XLOC_068333;XLOC_073574;XLOC_075150;XLOC_075151;XLOC_078570;XLOC_079029;XLOC_086831;XLOC_087678;XLOC_091880;XLOC_093408;XLOC_093835;XLOC_101878;XLOC_104103;BnaA01g00140D;BnaA01g00150D;BnaA01g00410D;BnaA01g00590D;BnaA01g00600D;BnaA0…
	Metabolism	Global and Overview	Biosynthesis of antibiotics	379	1975	6.48253e-10	ko01130	XLOC_001796;XLOC_005724;XLOC_009808;XLOC_010693;XLOC_015971;XLOC_035675;XLOC_035912;XLOC_041648;XLOC_043384;XLOC_057147;XLOC_067485;XLOC_068333;XLOC_075151;XLOC_078570;XLOC_079029;XLOC_086831;XLOC_087678;XLOC_091880;XLOC_093408;XLOC_093835;XLOC_101878;XLOC_104103;BnaA01g01020D;BnaA01g01700D;BnaA01g03860D;BnaA01g09220D;BnaA01g13520D;BnaA01g13990D;BnaA01g14190D;BnaA01g15640D;BnaA01g17630D;BnaA01g19…
	Metabolism	Glycan biosynthesis and metabolism	N-Glycan biosynthesis	60	191	1.72132e-08	ko00510	XLOC_030952;XLOC_072882;BnaA01g09030D;BnaA02g02390D;BnaA02g25880D;BnaA03g04910D;BnaA03g05150D;BnaA03g07700D;BnaA03g43680D;BnaA03g58520D;BnaA04g08660D;BnaA05g00230D;BnaA05g04210D;BnaA06g34690D;BnaA06g38380D;BnaA07g12390D;BnaA07g24990D;BnaA07g32680D;BnaA07g34390D;BnaA07g38690D;BnaA08g17630D;BnaA08g23440D;BnaA09g07760D;BnaA09g52360D;BnaA09g56260D;BnaA10g00040D;BnaA10g19260D;BnaC02g08920D;BnaC03g0073…
	Genetic Information Processing	Replication and repair	Non-homologous end-joining	15	22	2.15975e-07	ko03450	XLOC_071008;BnaA03g14800D;BnaA06g11440D;BnaA08g25700D;BnaA08g29690D;BnaA10g11190D;BnaC03g17840D;BnaC05g13070D;BnaC08g03910D;BnaC08g14330D;BnaC08g14360D;BnaC09g30690D;BnaC09g53370D;BnaCnng41270D;BnaCnng53340D
	Metabolism	Glycan biosynthesis and metabolism	Other glycan degradation	27	61	2.15975e-07	ko00511	XLOC_040537;XLOC_056031;XLOC_077464;BnaA01g23710D;BnaA01g31200D;BnaA02g13390D;BnaA03g04620D;BnaA03g40310D;BnaA04g03760D;BnaA04g05190D;BnaA04g16250D;BnaA06g32690D;BnaA07g22890D;BnaA07g25350D;BnaA09g50290D;BnaAnng14060D;BnaC03g06150D;BnaC04g25580D;BnaC04g27780D;BnaC04g39500D;BnaC06g23870D;BnaC06g27130D;BnaC06g28980D;BnaC06g29050D;BnaC07g23810D;BnaC07g31270D;BnaC08g44330D
	Metabolism	Metabolism of cofactors and vitamins	Porphyrin and chlorophyll metabolism	53	180	1.12681e-06	ko00860	BnaA01g14420D;BnaA01g15800D;BnaA01g16440D;BnaA01g20360D;BnaA02g24150D;BnaA02g31710D;BnaA03g02420D;BnaA03g30860D;BnaA03g33630D;BnaA03g47110D;BnaA03g48610D;BnaA03g58320D;BnaA05g24620D;BnaA05g29200D;BnaA06g04910D;BnaA06g13830D;BnaA07g12810D;BnaA08g27540D;BnaA08g30360D;BnaA09g06520D;BnaA09g40440D;BnaA09g50920D;BnaA10g02050D;BnaA10g02760D;BnaA10g16310D;BnaA10g19460D;BnaAnng06210D;BnaC01g17000D;BnaC01g…
	Metabolism	Global and Overview	Biosynthesis of amino acids	207	1043	1.14185e-06	ko01230	XLOC_015971;XLOC_041648;XLOC_057147;XLOC_068333;XLOC_075150;XLOC_075151;XLOC_078570;XLOC_086831;XLOC_087678;XLOC_091664;XLOC_091880;XLOC_093408;XLOC_101878;BnaA01g01700D;BnaA01g14190D;BnaA01g15640D;BnaA01g20380D;BnaA01g23200D;BnaA01g32000D;BnaA01g33410D;BnaA01g34720D;BnaA02g00750D;BnaA02g03040D;BnaA02g05780D;BnaA02g16170D;BnaA02g18710D;BnaA02g19550D;BnaA02g19650D;BnaA02g27010D;BnaA03g05080D;BnaA0…
	Metabolism	Nucleotide metabolism	Purine metabolism	133	613	1.61041e-06	ko00230	XLOC_057147;XLOC_067485;XLOC_079029;XLOC_101878;XLOC_102347;BnaA01g09220D;BnaA01g13520D;BnaA01g14090D;BnaA01g14530D;BnaA01g17980D;BnaA01g19120D;BnaA01g22480D;BnaA01g34620D;BnaA02g06560D;BnaA02g20440D;BnaA02g27230D;BnaA03g17360D;BnaA03g19740D;BnaA03g36910D;BnaA03g45390D;BnaA03g54400D;BnaA03g58310D;BnaA04g05760D;BnaA04g21890D;BnaA04g25770D;BnaA04g29130D;BnaA05g02620D;BnaA05g08630D;BnaA05g08860D;Bna…
	Metabolism	Energy metabolism	Photosynthesis	66	256	5.44135e-06	ko00195	BnaA01g11190D;BnaA01g18870D;BnaA01g19750D;BnaA02g23660D;BnaA02g34830D;BnaA03g24090D;BnaA05g33860D;BnaA06g00210D;BnaA06g01680D;BnaA06g04820D;BnaA06g06760D;BnaA06g08980D;BnaA07g06900D;BnaA07g11510D;BnaA07g11540D;BnaA07g12480D;BnaA07g20510D;BnaA07g32320D;BnaA07g38700D;BnaA08g00380D;BnaA08g01590D;BnaA08g07940D;BnaA08g21860D;BnaA08g27510D;BnaA08g28710D;BnaA09g01080D;BnaA09g06690D;BnaA09g19760D;BnaA09g…
	Metabolism	Metabolism of cofactors and vitamins	Pantothenate and CoA biosynthesis	39	125	7.62054e-06	ko00770	BnaA01g20380D;BnaA01g23200D;BnaA02g03040D;BnaA03g14730D;BnaA04g01910D;BnaA05g27590D;BnaA06g24740D;BnaA06g29910D;BnaA07g05810D;BnaA07g17940D;BnaA08g13350D;BnaA08g26000D;BnaA09g06820D;BnaA09g55140D;BnaA09g55150D;BnaA10g20470D;BnaAnng00250D;BnaAnng11060D;BnaAnng15120D;BnaC01g30200D;BnaC01g34530D;BnaC02g03620D;BnaC02g06500D;BnaC03g17780D;BnaC03g47110D;BnaC03g68290D;BnaC04g12850D;BnaC04g23500D;BnaC05g…
	Metabolism	Glycan biosynthesis and metabolism	Glycosaminoglycan degradation	15	31	5.39688e-05	ko00531	BnaA02g01810D;BnaA02g31270D;BnaA04g03760D;BnaA04g05190D;BnaA07g22890D;BnaA07g25350D;BnaA09g50290D;BnaA10g23380D;BnaC02g04940D;BnaC04g25580D;BnaC04g27780D;BnaC06g23870D;BnaC06g27130D;BnaC08g44330D;BnaC09g48030D
	Metabolism	Carbohydrate metabolism	Propanoate metabolism	37	126	6.08411e-05	ko00640	BnaA01g17630D;BnaA03g17570D;BnaA03g25350D;BnaA03g34340D;BnaA03g37330D;BnaA03g39510D;BnaA04g12330D;BnaA04g17110D;BnaA05g30630D;BnaA06g30370D;BnaA07g18710D;BnaA08g00430D;BnaA08g12350D;BnaA08g28670D;BnaA09g02880D;BnaA09g08370D;BnaAnng21810D;BnaAnng22560D;BnaC01g21970D;BnaC02g06560D;BnaC03g07000D;BnaC03g21010D;BnaC03g29800D;BnaC03g67370D;BnaC03g70580D;BnaC04g07230D;BnaC04g33330D;BnaC04g40450D;BnaC04g…
	Genetic Information Processing	Replication and repair	Base excision repair	39	137	7.29497e-05	ko03410	XLOC_017854;XLOC_071008;BnaA01g26640D;BnaA02g19740D;BnaA03g04580D;BnaA03g14460D;BnaA03g41520D;BnaA04g23940D;BnaA05g11420D;BnaA05g14830D;BnaA05g15640D;BnaA05g20400D;BnaA06g15440D;BnaA08g25700D;BnaA09g15590D;BnaA09g31540D;BnaA09g49520D;BnaC01g25220D;BnaC02g31120D;BnaC02g41640D;BnaC03g06110D;BnaC03g17500D;BnaC03g30970D;BnaC03g47130D;BnaC04g13660D;BnaC04g47700D;BnaC04g48110D;BnaC05g32360D;BnaC05g4049…
	Metabolism	Amino acid metabolism	Arginine biosynthesis	43	164	0.000227375	ko00220	XLOC_087678;XLOC_091664;XLOC_093408;BnaA01g14190D;BnaA01g33880D;BnaA02g19550D;BnaA03g46970D;BnaA03g51850D;BnaA03g54190D;BnaA03g54610D;BnaA03g56420D;BnaA05g07020D;BnaA06g02140D;BnaA06g17380D;BnaA06g40880D;BnaA07g09480D;BnaA09g10660D;BnaA09g36870D;BnaA10g16660D;BnaA10g17910D;BnaA10g21480D;BnaA10g23880D;BnaAnng17940D;BnaC02g06690D;BnaC03g19380D;BnaC04g07830D;BnaC04g54310D;BnaC05g07240D;BnaC05g31580D…
	Metabolism	Amino acid metabolism	Valine, leucine and isoleucine biosynthesis	32	110	0.000249339	ko00290	XLOC_075150;BnaA01g20380D;BnaA01g23200D;BnaA01g32000D;BnaA02g03040D;BnaA02g19650D;BnaA03g14730D;BnaA04g01910D;BnaA06g12630D;BnaA06g24740D;BnaA07g05810D;BnaA07g17940D;BnaA08g26000D;BnaA09g44550D;BnaA09g55140D;BnaA09g55150D;BnaAnng16560D;BnaC01g30200D;BnaC02g06500D;BnaC03g17780D;BnaC04g12850D;BnaC04g23500D;BnaC05g14180D;BnaC06g03270D;BnaC06g16700D;BnaC06g40420D;BnaC08g13970D;BnaC08g29320D;BnaC08g37…
	Metabolism	Glycan biosynthesis and metabolism	Glycosphingolipid biosynthesis - globo series	16	39	0.000249339	ko00603	BnaA01g30130D;BnaA03g02510D;BnaA04g03760D;BnaA05g29310D;BnaA07g25350D;BnaA09g50290D;BnaAnng06140D;BnaC01g38080D;BnaC01g39240D;BnaC02g01160D;BnaC03g03520D;BnaC03g03530D;BnaC04g25580D;BnaC06g27130D;BnaC08g44330D;BnaCnng24210D
	Metabolism	Glycan biosynthesis and metabolism	Glycosphingolipid biosynthesis - ganglio series	10	18	0.000310825	ko00604	BnaA04g03760D;BnaA04g05190D;BnaA07g22890D;BnaA07g25350D;BnaA09g50290D;BnaC04g25580D;BnaC04g27780D;BnaC06g23870D;BnaC06g27130D;BnaC08g44330D
	Metabolism	Metabolism of cofactors and vitamins	Thiamine metabolism	13	29	0.000404402	ko00730	BnaA01g35430D;BnaA02g09460D;BnaA02g27980D;BnaA03g11710D;BnaA03g36320D;BnaA03g41980D;BnaA07g05920D;BnaA10g08550D;BnaA10g21120D;BnaC01g22400D;BnaC04g54380D;BnaC07g33090D;BnaC09g31160D
	Metabolism	Glycan biosynthesis and metabolism	Glycosylphosphatidylinositol(GPI)-anchor biosynthesis	24	76	0.000457906	ko00563	BnaA01g08780D;BnaA03g56790D;BnaA05g30390D;BnaA05g33900D;BnaA05g34590D;BnaA06g05070D;BnaA06g10750D;BnaA08g25070D;BnaA09g12910D;BnaA09g36520D;BnaA09g42490D;BnaA09g56460D;BnaA10g17420D;BnaA10g27110D;BnaC02g05790D;BnaC03g25290D;BnaC05g48780D;BnaC06g16300D;BnaC08g15140D;BnaC08g16860D;BnaC08g28100D;BnaC08g34930D;BnaCnng40450D;BnaCnng54040D
	Metabolism	Global and Overview	Fatty acid metabolism	74	344	0.000572343	ko01212	XLOC_012994;XLOC_041916;XLOC_104103;BnaA01g32550D;BnaA01g32860D;BnaA02g13310D;BnaA03g02950D;BnaA03g17570D;BnaA03g37760D;BnaA03g38220D;BnaA03g43090D;BnaA04g17370D;BnaA04g26960D;BnaA05g12180D;BnaA05g12360D;BnaA05g16170D;BnaA05g30610D;BnaA05g30630D;BnaA05g37330D;BnaA06g28680D;BnaA06g30370D;BnaA07g36830D;BnaA08g28040D;BnaA08g30740D;BnaA09g02880D;BnaA09g12890D;BnaA09g13840D;BnaA09g34930D;BnaA10g21780D…
	Metabolism	Amino acid metabolism	Valine, leucine and isoleucine degradation	47	199	0.00109051	ko00280	XLOC_104103;BnaA01g17630D;BnaA02g21580D;BnaA03g34340D;BnaA03g37330D;BnaA03g50840D;BnaA04g17110D;BnaA05g30630D;BnaA06g16950D;BnaA06g24740D;BnaA06g30370D;BnaA07g12930D;BnaA07g18710D;BnaA08g00430D;BnaA08g08120D;BnaA08g09990D;BnaA08g11650D;BnaA08g12350D;BnaA08g26000D;BnaA08g28040D;BnaA08g28670D;BnaA09g02880D;BnaA09g08370D;BnaC01g00550D;BnaC01g21970D;BnaC03g53360D;BnaC03g64520D;BnaC03g67370D;BnaC03g70…
	Metabolism	Lipid metabolism	Steroid biosynthesis	37	147	0.0012872	ko00100	XLOC_005724;XLOC_010693;XLOC_043384;XLOC_073574;BnaA01g25880D;BnaA03g23480D;BnaA03g38150D;BnaA04g05110D;BnaA05g19350D;BnaA06g07270D;BnaA06g14200D;BnaA06g26720D;BnaA07g03890D;BnaA07g15920D;BnaA07g32310D;BnaA08g31650D;BnaA09g40620D;BnaA09g41120D;BnaAnng14740D;BnaAnng24600D;BnaAnng24610D;BnaAnng37380D;BnaC02g04950D;BnaC03g33050D;BnaC03g74380D;BnaC05g32840D;BnaC05g48230D;BnaC06g00160D;BnaC06g14310D;B…
	Metabolism	Energy metabolism	Photosynthesis - antenna proteins	23	77	0.00132221	ko00196	BnaA02g29010D;BnaA05g09400D;BnaA05g09410D;BnaA05g29390D;BnaA06g10520D;BnaA06g17350D;BnaA07g16530D;BnaA08g23760D;BnaA09g13710D;BnaA09g34720D;BnaA09g56570D;BnaAnng00160D;BnaAnng22920D;BnaC04g10770D;BnaC04g10780D;BnaC05g12070D;BnaC06g15470D;BnaC08g16790D;BnaC08g38660D;BnaC09g30700D;BnaCnng15190D;BnaCnng21010D;BnaCnng24140D
	Metabolism	Amino acid metabolism	Lysine biosynthesis	20	63	0.00132221	ko00300	BnaA03g20590D;BnaA05g04860D;BnaA05g07080D;BnaA06g09610D;BnaA07g37630D;BnaA09g25320D;BnaA09g33840D;BnaA10g20010D;BnaA10g20730D;BnaC02g04620D;BnaC04g04200D;BnaC04g07890D;BnaC04g50190D;BnaC04g55250D;BnaC05g49480D;BnaC06g14840D;BnaC08g24610D;BnaC08g31020D;BnaC09g43800D;BnaCnng21170D
	Metabolism	Biosynthesis of other secondary metabolites	Monobactam biosynthesis	17	51	0.00190519	ko00261	BnaA01g19120D;BnaA03g20590D;BnaA05g04860D;BnaA06g09610D;BnaA06g36560D;BnaA09g25320D;BnaA10g20010D;BnaC01g22950D;BnaC02g04620D;BnaC04g04200D;BnaC04g50190D;BnaC04g55250D;BnaC05g49480D;BnaC07g17320D;BnaC08g31020D;BnaC09g43800D;BnaCnng21170D
	Metabolism	Energy metabolism	Sulfur metabolism	37	154	0.00289094	ko00920	XLOC_009808;XLOC_078570;XLOC_078654;XLOC_091880;BnaA01g19120D;BnaA01g34620D;BnaA02g34000D;BnaA03g10610D;BnaA03g28870D;BnaA03g31290D;BnaA03g54400D;BnaA06g00050D;BnaA06g00120D;BnaA06g10080D;BnaA06g25000D;BnaA06g36560D;BnaA09g20370D;BnaA10g25620D;BnaAnng21580D;BnaAnng23390D;BnaC01g00790D;BnaC01g22950D;BnaC02g25610D;BnaC02g42860D;BnaC03g13300D;BnaC03g32640D;BnaC03g36650D;BnaC03g70970D;BnaC04g21780D;B…
	Metabolism	Global and Overview	2-Oxocarboxylic acid metabolism	70	342	0.00293687	ko01210	XLOC_075150;XLOC_091664;XLOC_093408;BnaA01g01700D;BnaA01g20380D;BnaA01g23200D;BnaA01g34610D;BnaA02g03040D;BnaA02g19550D;BnaA02g19650D;BnaA03g14730D;BnaA03g51850D;BnaA03g54190D;BnaA03g54610D;BnaA03g56420D;BnaA04g01910D;BnaA04g12790D;BnaA05g03050D;BnaA05g07020D;BnaA06g09610D;BnaA06g12630D;BnaA06g24740D;BnaA06g40880D;BnaA07g05810D;BnaA07g17940D;BnaA07g31260D;BnaA08g26000D;BnaA09g10660D;BnaA09g36870D…
	Metabolism	Lipid metabolism	Fatty acid elongation	31	124	0.00356641	ko00062	BnaA01g02870D;BnaA02g13310D;BnaA02g22340D;BnaA02g36400D;BnaA03g02950D;BnaA03g43090D;BnaA03g51030D;BnaA04g16560D;BnaA06g13650D;BnaA07g36830D;BnaA09g34930D;BnaA10g21780D;BnaAnng23510D;BnaAnng37790D;BnaC01g04130D;BnaC01g20970D;BnaC01g20980D;BnaC01g33520D;BnaC02g02670D;BnaC02g06360D;BnaC02g27480D;BnaC04g15590D;BnaC06g28830D;BnaC07g04810D;BnaC07g11110D;BnaC07g11120D;BnaC08g26140D;BnaC08g46130D;BnaC09g…
	Metabolism	Amino acid metabolism	Phenylalanine, tyrosine and tryptophan biosynthesis	42	197	0.0142066	ko00400	XLOC_015971;XLOC_068333;XLOC_075151;XLOC_086831;XLOC_093408;BnaA01g34720D;BnaA02g00750D;BnaA02g05780D;BnaA03g20560D;BnaA03g21950D;BnaA03g29410D;BnaA03g30110D;BnaA03g51850D;BnaA03g54610D;BnaA04g12570D;BnaA05g29990D;BnaA05g30990D;BnaA07g29720D;BnaA07g34140D;BnaA09g00950D;BnaA09g10660D;BnaA09g56680D;BnaA10g13820D;BnaC01g00830D;BnaC01g15060D;BnaC02g07710D;BnaC03g26270D;BnaC03g34680D;BnaC03g35390D;Bna…
	Metabolism	Metabolism of terpenoids and polyketides	Terpenoid backbone biosynthesis	48	233	0.0151842	ko00900	BnaA01g01020D;BnaA01g35430D;BnaA02g21580D;BnaA02g21620D;BnaA02g26450D;BnaA03g02480D;BnaA03g16600D;BnaA03g36320D;BnaA03g41980D;BnaA03g52470D;BnaA04g04210D;BnaA04g10140D;BnaA06g22280D;BnaA06g25770D;BnaA06g30370D;BnaA07g01750D;BnaA08g19580D;BnaA08g25150D;BnaA09g02880D;BnaA09g03730D;BnaA09g06230D;BnaA09g34180D;BnaA10g21120D;BnaA10g29300D;BnaAnng17980D;BnaC01g22400D;BnaC02g06290D;BnaC02g10540D;BnaC02g…
	Metabolism	Metabolism of cofactors and vitamins	Lipoic acid metabolism	7	17	0.0230189	ko00785	BnaA03g55720D;BnaA03g55730D;BnaAnng06100D;BnaC02g01120D;BnaC03g03570D;BnaC03g03580D;BnaC05g49020D
	Metabolism	Lipid metabolism	Fatty acid biosynthesis	37	180	0.0393585	ko00061	XLOC_041916;BnaA01g32860D;BnaA03g17570D;BnaA03g37760D;BnaA03g38220D;BnaA04g07120D;BnaA04g17370D;BnaA04g26960D;BnaA05g12180D;BnaA05g16170D;BnaA05g37330D;BnaA06g28680D;BnaA07g05070D;BnaA09g12890D;BnaAnng22560D;BnaC02g06560D;BnaC03g07000D;BnaC03g21010D;BnaC03g33080D;BnaC03g44210D;BnaC03g45040D;BnaC03g75820D;BnaC04g07230D;BnaC04g34640D;BnaC04g41000D;BnaC04g51420D;BnaC05g07580D;BnaC05g21140D;BnaC05g51…
	Metabolism	Amino acid metabolism	Alanine, aspartate and glutamate metabolism	49	252	0.0393585	ko00250	XLOC_087678;XLOC_091664;XLOC_093408;BnaA01g09220D;BnaA01g14190D;BnaA01g24820D;BnaA01g33880D;BnaA02g14400D;BnaA03g37150D;BnaA03g46970D;BnaA03g51850D;BnaA03g54610D;BnaA03g58310D;BnaA06g02140D;BnaA07g09480D;BnaA07g17380D;BnaA07g28110D;BnaA07g34930D;BnaA08g08790D;BnaA09g08290D;BnaA09g10660D;BnaA10g16660D;BnaA10g17910D;BnaA10g20600D;BnaA10g21480D;BnaA10g23880D;BnaC01g00550D;BnaC02g06690D;BnaC02g19320D…
	Metabolism	Lipid metabolism	alpha-Linolenic acid metabolism	34	165	0.0471938	ko00592	XLOC_104103;BnaA01g32550D;BnaA02g11430D;BnaA02g16020D;BnaA02g17670D;BnaA03g41900D;BnaA05g14430D;BnaA05g30610D;BnaA05g32660D;BnaA07g24960D;BnaA08g24350D;BnaA08g28040D;BnaA08g30740D;BnaA09g44740D;BnaC02g15950D;BnaC02g21440D;BnaC03g19540D;BnaC04g28570D;BnaC05g45070D;BnaC05g47740D;BnaC05g47750D;BnaC06g18870D;BnaC06g26670D;BnaC07g13070D;BnaC07g32980D;BnaC07g41660D;BnaC08g00920D;BnaC08g13270D;BnaC08g15…
Spring-specific up
	Metabolism	Global and Overview	Biosynthesis of secondary metabolites	159	4613	0.00296353	ko01110	XLOC_007477;XLOC_042853;XLOC_074965;BnaA01g00510D;BnaA01g00520D;BnaA01g02780D;BnaA01g17800D;BnaA01g32210D;BnaA02g02020D;BnaA02g03450D;BnaA02g03770D;BnaA02g09960D;BnaA02g32190D;BnaA03g03400D;BnaA03g04590D;BnaA03g10470D;BnaA03g21850D;BnaA03g28400D;BnaA03g35400D;BnaA03g36140D;BnaA03g38440D;BnaA03g39710D;BnaA03g46210D;BnaA03g50850D;BnaA03g53180D;BnaA03g53940D;BnaA03g56490D;BnaA04g00820D;BnaA04g05090D…
	Metabolism	Global and Overview	Microbial metabolism in diverse environments	72	1747	0.00296353	ko01120	XLOC_014669;XLOC_025278;BnaA01g00510D;BnaA01g00520D;BnaA01g11840D;BnaA01g17800D;BnaA01g18450D;BnaA02g02310D;BnaA02g02850D;BnaA02g32190D;BnaA03g03400D;BnaA03g36860D;BnaA03g41960D;BnaA03g46210D;BnaA03g53940D;BnaA04g05090D;BnaA06g03380D;BnaA06g05000D;BnaA06g33050D;BnaA06g34160D;BnaA06g39320D;BnaA07g04150D;BnaA07g36300D;BnaA07g37420D;BnaA07g38160D;BnaA08g00900D;BnaA08g06130D;BnaA08g17560D;BnaA09g0198…
	Metabolism	Biosynthesis of other secondary metabolites	Flavonoid biosynthesis	11	103	0.00296353	ko00941	BnaA03g04590D;BnaA03g50850D;BnaA05g11950D;BnaA07g37900D;BnaA09g15710D;BnaA10g19670D;BnaC01g14310D;BnaC03g06120D;BnaC07g37670D;BnaC08g26010D;BnaCnng61390D
	Metabolism	Metabolism of other amino acids	Glutathione metabolism	22	365	0.0070852	ko00480	BnaA02g03440D;BnaA02g21680D;BnaA02g28570D;BnaA04g06510D;BnaA07g06010D;BnaA07g20560D;BnaA07g20580D;BnaA07g20590D;BnaA09g01980D;BnaA09g21570D;BnaA09g23220D;BnaA10g20180D;BnaC02g07110D;BnaC03g17600D;BnaC03g47720D;BnaC03g47760D;BnaC04g40550D;BnaC06g05520D;BnaC08g37930D;BnaC09g29340D;BnaCnng67520D;BnaCnng76180D
	Metabolism	Biosynthesis of other secondary metabolites	Stilbenoid, diarylheptanoid and gingerol biosynthesis	16	262	0.0338178	ko00945	BnaA01g00510D;BnaA01g00520D;BnaA02g32190D;BnaA03g50850D;BnaA03g53940D;BnaA04g05090D;BnaA05g11950D;BnaA06g33050D;BnaC01g01500D;BnaC02g35940D;BnaC02g40820D;BnaC02g40870D;BnaC03g18290D;BnaC03g61420D;BnaC07g23380D;BnaCnng74800D
Winter-specific up
	Organismal Systems	Environmental adaptation	Plant-pathogen interaction	43	862	0.000129301	ko04626	BnaA01g20340D;BnaA01g23040D;BnaA03g10790D;BnaA03g11100D;BnaA03g11110D;BnaA03g13340D;BnaA03g16730D;BnaA04g02760D;BnaA05g00790D;BnaA05g11330D;BnaA06g38470D;BnaA06g40890D;BnaA07g30990D;BnaA09g09050D;BnaA09g17950D;BnaA09g19500D;BnaA09g37690D;BnaA09g44420D;BnaAnng04440D;BnaC01g03240D;BnaC02g04520D;BnaC02g12700D;BnaC03g16150D;BnaC03g35300D;BnaC03g66580D;BnaC04g00430D;BnaC04g06800D;BnaC04g23100D;BnaC04g…
	Environmental Information Processing	Signal transduction	Plant hormone signal transduction	55	1239	0.000129301	ko04075	XLOC_078306;BnaA01g25020D;BnaA01g28670D;BnaA02g01520D;BnaA03g04250D;BnaA03g04300D;BnaA03g36940D;BnaA03g48550D;BnaA04g22750D;BnaA05g05420D;BnaA05g08020D;BnaA05g12650D;BnaA05g22360D;BnaA05g27660D;BnaA06g27640D;BnaA07g20630D;BnaA07g23750D;BnaA08g20970D;BnaA08g22180D;BnaA08g27770D;BnaA09g11010D;BnaA09g39680D;BnaA10g06890D;BnaA10g20060D;BnaAnng23920D;BnaAnng28860D;BnaC01g01570D;BnaC01g03680D;BnaC01g43…
	Metabolism	Carbohydrate metabolism	Inositol phosphate metabolism	17	252	0.0030393	ko00562	XLOC_043489;BnaA02g07530D;BnaA03g30260D;BnaA03g30270D;BnaA05g33260D;BnaA09g10050D;BnaA10g23820D;BnaA10g29490D;BnaA10g29510D;BnaAnng36640D;BnaC03g35580D;BnaC03g35590D;BnaC07g01430D;BnaC09g34010D;BnaC09g41080D;BnaCnng58420D;BnaUnng04440D
	Metabolism	Carbohydrate metabolism	Starch and sucrose metabolism	38	894	0.00567598	ko00500	XLOC_007869;XLOC_067698;XLOC_095988;BnaA01g07270D;BnaA01g12320D;BnaA01g34050D;BnaA01g37220D;BnaA02g18920D;BnaA03g37710D;BnaA05g03980D;BnaA05g04020D;BnaA05g04610D;BnaA05g25600D;BnaA06g02800D;BnaA06g12710D;BnaA06g27590D;BnaA07g08740D;BnaA07g32360D;BnaA09g09720D;BnaA09g14750D;BnaA09g55340D;BnaA10g01400D;BnaAnng22210D;BnaC03g10290D;BnaC04g49630D;BnaC04g51130D;BnaC05g39500D;BnaC06g03640D;BnaC06g03650D…
	Environmental Information Processing	Signal transduction	Phosphatidylinositol signaling system	19	330	0.00567598	ko04070	XLOC_043489;BnaA02g07530D;BnaA03g30260D;BnaA03g30270D;BnaA04g02760D;BnaA05g33260D;BnaA09g10340D;BnaA09g13270D;BnaA10g23820D;BnaA10g29490D;BnaA10g29510D;BnaAnng36640D;BnaC02g42690D;BnaC03g35580D;BnaC03g35590D;BnaC09g34010D;BnaC09g41080D;BnaCnng58420D;BnaUnng04440D
	Metabolism	Metabolism of terpenoids and polyketides	Carotenoid biosynthesis	9	123	0.0409791	ko00906	BnaA03g33400D;BnaA07g39250D;BnaA09g26450D;BnaC06g41140D;BnaC07g18360D;BnaC08g45810D;BnaC08g46370D;BnaC09g18860D;BnaCnng70650D
Spring-specific down
	Organismal Systems	Environmental adaptation	Plant-pathogen interaction	87	862	0.0160588	ko04626	XLOC_037206;XLOC_051897;XLOC_088161;BnaA01g10690D;BnaA01g15270D;BnaA01g27860D;BnaA02g01160D;BnaA02g04170D;BnaA02g22690D;BnaA02g32840D;BnaA03g01490D;BnaA03g04220D;BnaA03g22380D;BnaA03g27250D;BnaA03g35770D;BnaA03g38380D;BnaA03g38480D;BnaA05g28200D;BnaA05g29880D;BnaA05g34850D;BnaA06g08260D;BnaA06g26290D;BnaA06g30520D;BnaA07g12770D;BnaA07g17350D;BnaA07g32960D;BnaA08g24860D;BnaA09g08020D;BnaA09g13280D…
Winter-specific down
	Metabolism	Lipid metabolism	Fatty acid elongation	29	124	0.000171476	ko00062	BnaA04g06040D;BnaA04g15380D;BnaA05g01150D;BnaA07g03590D;BnaA07g14020D;BnaA07g18630D;BnaA07g24600D;BnaA07g26670D;BnaA09g08660D;BnaA09g28160D;BnaA09g28510D;BnaA09g40640D;BnaA09g51530D;BnaA10g00700D;BnaAnng28340D;BnaC02g17470D;BnaC02g30500D;BnaC03g32070D;BnaC04g00710D;BnaC04g38330D;BnaC04g39890D;BnaC05g00770D;BnaC06g25830D;BnaC06g42800D;BnaC07g05570D;BnaC07g34360D;BnaC07g44970D;BnaC08g33100D;BnaCnng…
	Metabolism	Global and Overview	Metabolic pathways	811	7938	0.000171476	ko01100	XLOC_002020;XLOC_015911;XLOC_031124;XLOC_032651;XLOC_037426;XLOC_037613;XLOC_039475;XLOC_040659;XLOC_043194;XLOC_043366;XLOC_043494;XLOC_045388;XLOC_049003;XLOC_049844;XLOC_054393;XLOC_057396;XLOC_059753;XLOC_062380;XLOC_073084;XLOC_079689;XLOC_087399;XLOC_088961;XLOC_091311;XLOC_091792;XLOC_091972;XLOC_093025;XLOC_096103;XLOC_098109;XLOC_099452;XLOC_100337;XLOC_103151;BnaA01g00520D;BnaA01g00570D…
	Metabolism	Global and Overview	Biosynthesis of secondary metabolites	492	4613	0.000491135	ko01110	XLOC_015911;XLOC_031124;XLOC_032651;XLOC_037613;XLOC_043194;XLOC_045388;XLOC_048591;XLOC_054393;XLOC_059753;XLOC_062380;XLOC_079689;XLOC_087399;XLOC_088961;XLOC_090203;XLOC_091792;XLOC_093025;XLOC_096103;XLOC_099452;XLOC_100337;BnaA01g00520D;BnaA01g00570D;BnaA01g03170D;BnaA01g03680D;BnaA01g04910D;BnaA01g05670D;BnaA01g07610D;BnaA01g08240D;BnaA01g08700D;BnaA01g13390D;BnaA01g15140D;BnaA01g15420D;Bna…
	Metabolism	Global and Overview	Biosynthesis of amino acids	132	1043	0.00120176	ko01230	XLOC_031124;XLOC_032651;XLOC_043194;XLOC_079689;XLOC_088961;XLOC_091311;XLOC_100337;XLOC_103151;BnaA01g02930D;BnaA01g04910D;BnaA01g07610D;BnaA01g08700D;BnaA01g15420D;BnaA01g16010D;BnaA01g21560D;BnaA01g24280D;BnaA02g02020D;BnaA02g09370D;BnaA02g27140D;BnaA03g12250D;BnaA03g23800D;BnaA03g27620D;BnaA03g35260D;BnaA03g38440D;BnaA03g43390D;BnaA04g01030D;BnaA04g01540D;BnaA04g08160D;BnaA04g08710D;BnaA04g16…
	Metabolism	Global and Overview	Microbial metabolism in diverse environments	205	1747	0.00120176	ko01120	XLOC_049003;XLOC_088961;XLOC_091311;XLOC_093025;XLOC_103151;BnaA01g00520D;BnaA01g00570D;BnaA01g02930D;BnaA01g07610D;BnaA01g11840D;BnaA01g13390D;BnaA01g15420D;BnaA01g24280D;BnaA01g31570D;BnaA02g09370D;BnaA02g09890D;BnaA02g26140D;BnaA02g27140D;BnaA02g27830D;BnaA02g27890D;BnaA02g30030D;BnaA03g12250D;BnaA03g19380D;BnaA03g23330D;BnaA03g25830D;BnaA03g25850D;BnaA03g33380D;BnaA03g33640D;BnaA03g35260D;Bna…
	Metabolism	Metabolism of terpenoids and polyketides	Brassinosteroid biosynthesis	13	46	0.00335497	ko00905	XLOC_090203;BnaA01g35580D;BnaA05g25680D;BnaA06g30720D;BnaA09g31290D;BnaA10g24860D;BnaAnng21530D;BnaC01g23810D;BnaC01g37470D;BnaC02g05340D;BnaC02g38080D;BnaC05g39590D;BnaC07g25950D
	Metabolism	Energy metabolism	Sulfur metabolism	27	154	0.0117571	ko00920	XLOC_049003;XLOC_088961;BnaA01g11840D;BnaA01g31570D;BnaA03g27620D;BnaA03g38670D;BnaA04g01540D;BnaA06g23140D;BnaA07g20420D;BnaA08g00140D;BnaA08g16110D;BnaA09g03550D;BnaA09g06680D;BnaA09g08410D;BnaC02g06000D;BnaC02g39510D;BnaC03g50260D;BnaC04g10980D;BnaC05g46890D;BnaC05g46930D;BnaC05g48620D;BnaC06g11170D;BnaC06g19960D;BnaC07g27640D;BnaC09g08710D;BnaC09g50680D;BnaCnng47170D
	Metabolism	Lipid metabolism	Glycerophospholipid metabolism	54	384	0.0124688	ko00564	XLOC_037613;XLOC_091792;XLOC_096103;BnaA01g15140D;BnaA03g01150D;BnaA03g18520D;BnaA03g19520D;BnaA03g24870D;BnaA03g24880D;BnaA03g45270D;BnaA03g60440D;BnaA04g03890D;BnaA04g10460D;BnaA05g28450D;BnaA05g35390D;BnaA06g16410D;BnaA06g33540D;BnaA06g37030D;BnaA06g38300D;BnaA07g07240D;BnaA07g18070D;BnaA07g21920D;BnaA07g35160D;BnaA09g15750D;BnaA09g22870D;BnaA09g23320D;BnaA10g11230D;BnaA10g26130D;BnaAnng13600D…
	Metabolism	Energy metabolism	Photosynthesis	38	256	0.0216742	ko00195	XLOC_073084;BnaA01g08260D;BnaA02g13320D;BnaA03g25540D;BnaA04g07250D;BnaA04g17660D;BnaA05g11890D;BnaA05g13640D;BnaA05g23550D;BnaA08g04820D;BnaA08g31180D;BnaA09g01470D;BnaA09g07840D;BnaA09g08030D;BnaA09g25260D;BnaA09g45770D;BnaA09g48920D;BnaA10g27910D;BnaAnng14750D;BnaC01g28900D;BnaC04g15560D;BnaC04g15570D;BnaC04g24890D;BnaC04g41290D;BnaC04g41300D;BnaC04g55930D;BnaC05g04590D;BnaC05g06070D;BnaC05g23…
	Metabolism	Metabolism of cofactors and vitamins	Folate biosynthesis	15	72	0.0216742	ko00790	BnaA01g02590D;BnaA03g14790D;BnaA03g39030D;BnaA05g27340D;BnaA06g36040D;BnaA07g34310D;BnaA09g53350D;BnaC01g03830D;BnaC01g38830D;BnaC02g02140D;BnaC02g25180D;BnaC03g46190D;BnaC04g40110D;BnaC07g19030D;BnaC09g16810D
	Metabolism	Lipid metabolism	Linoleic acid metabolism	11	45	0.0216742	ko00591	BnaA03g01150D;BnaA07g19600D;BnaA07g24860D;BnaA07g24880D;BnaA07g38540D;BnaA10g26130D;BnaAnng34320D;BnaC03g01520D;BnaC06g26190D;BnaCnng38620D;BnaCnng67400D
	Genetic Information Processing	Folding, sorting and degradation	RNA degradation	64	496	0.0264806	ko03018	XLOC_032457;XLOC_073351;XLOC_094025;BnaA01g07610D;BnaA01g15420D;BnaA01g35820D;BnaA02g01720D;BnaA02g04020D;BnaA02g17350D;BnaA03g06960D;BnaA03g16420D;BnaA04g01940D;BnaA04g07350D;BnaA04g18750D;BnaA06g00130D;BnaA06g10590D;BnaA06g18120D;BnaA06g35220D;BnaA07g17450D;BnaA07g17930D;BnaA07g18700D;BnaA07g31190D;BnaA07g32950D;BnaA07g34650D;BnaA07g38150D;BnaA08g13310D;BnaA08g27650D;BnaA08g30610D;BnaA09g03870D…
	Metabolism	Energy metabolism	Photosynthesis - antenna proteins	15	77	0.0327312	ko00196	BnaA02g18160D;BnaA03g37990D;BnaA03g60230D;BnaA04g00660D;BnaA04g20150D;BnaA10g07350D;BnaC02g24150D;BnaC02g37040D;BnaC02g44590D;BnaC03g44110D;BnaC04g21740D;BnaC07g09400D;BnaC07g24660D;BnaC08g25680D;BnaCnng31870D
	Cellular Processes	Transport and catabolism	Regulation of autophagy	25	156	0.0327312	ko04140	XLOC_051665;XLOC_078078;BnaA03g27640D;BnaA03g34550D;BnaA03g40280D;BnaA05g03770D;BnaA05g21390D;BnaA05g23940D;BnaA05g25460D;BnaA07g18980D;BnaC01g13410D;BnaC01g43860D;BnaC02g37730D;BnaC03g34720D;BnaC04g19210D;BnaC05g37750D;BnaC05g44440D;BnaC05g48600D;BnaC06g07010D;BnaC06g18000D;BnaC07g37050D;BnaC08g47980D;BnaC09g14690D;BnaC09g22690D;BnaCnng29110D
	Metabolism	Global and Overview	Biosynthesis of antibiotics	212	1975	0.0349406	ko01130	XLOC_031124;XLOC_032651;XLOC_043194;XLOC_045388;XLOC_054393;XLOC_059753;XLOC_079689;XLOC_093025;XLOC_100337;BnaA01g02930D;BnaA01g03680D;BnaA01g04910D;BnaA01g07610D;BnaA01g08700D;BnaA01g13390D;BnaA01g15420D;BnaA01g24280D;BnaA02g00400D;BnaA02g09370D;BnaA02g19770D;BnaA02g27140D;BnaA02g30030D;BnaA02g37020D;BnaA03g06020D;BnaA03g06870D;BnaA03g12250D;BnaA03g23800D;BnaA03g26940D;BnaA03g27620D;BnaA03g2970…
	Metabolism	Biosynthesis of other secondary metabolites	Glucosinolate biosynthesis	12	57	0.0359929	ko00966	BnaA03g39720D;BnaA04g06630D;BnaA04g24160D;BnaA06g11010D;BnaA08g04520D;BnaA09g29790D;BnaAnng06570D;BnaC02g41790D;BnaC04g29320D;BnaC04g47910D;BnaC05g12520D;BnaCnng21190D
	Metabolism	Metabolism of cofactors and vitamins	Riboflavin metabolism	9	38	0.0446957	ko00740	XLOC_015911;XLOC_087399;BnaA07g00510D;BnaA08g09970D;BnaC01g12760D;BnaC03g24640D;BnaC03g64500D;BnaC03g75520D;BnaC07g00180D
