# Supplementary material for: Characterization of cold stress responses in different rapeseed ecotypes based on metabolomics and transcriptomics analyses
Source: PeerJ. 2020 Mar 31;8:e8704. doi: 10.7717/peerj.8704 (PMC7120054; doi:10.7717/peerj.8704)
Supplement: Supplemental Information 11 [file peerj-08-8704-s011.xlsx]

## Sheet: S9
Table S9 MapMan Bins of DEGs enriched in different metabolic processes in spring B. napus ecotype after cold stress.
Gene ID	Log2 fold change -Spring	BINCODE	NAME	DESCRIPTION
BnaC01g41710D	-1.65517	1.2	PS.photorespiration	formyltetrahydrofolate deformylase/ hydroxymethyl-, formyl- and related transferase/ methyltransferase | chr4:9703547-9705468 REVERSE
BnaA03g21770D	-1.34064	1.3	PS.calvin cycle	Symbols: CP12-1, CP12 | CP12-1 | chr2:19446854-19447438 FORWARD
BnaA05g00550D	-1.37247	1.3	PS.calvin cycle	Symbols: CP12-1, CP12 | CP12-1 | chr2:19446854-19447438 FORWARD
BnaA07g19320D	-3.38384	1.3	PS.calvin cycle	Symbols: CP12-2, CP12 | CP12-2; protein binding | chr3:23090944-23091566 FORWARD
BnaA09g39860D	-1.52679	1.3	PS.calvin cycle	Symbols: CP12-2, CP12 | CP12-2; protein binding | chr3:23090944-23091566 FORWARD
BnaC04g51320D	-1.27013	1.3	PS.calvin cycle	Symbols: CP12-1, CP12 | CP12-1 | chr2:19446854-19447438 FORWARD
BnaC06g18520D	-4.32034	1.3	PS.calvin cycle	Symbols: CP12-2, CP12 | CP12-2; protein binding | chr3:23090944-23091566 FORWARD
BnaC08g32210D	-3.11502	1.3	PS.calvin cycle	Symbols: CP12-2, CP12 | CP12-2; protein binding | chr3:23090944-23091566 FORWARD
BnaC04g51970D	-1.32975	1.3	PS.calvin cycle	Symbols: CP12-1, CP12 | CP12-1 | chr2:19446854-19447438 FORWARD
BnaA03g50080D	-1.32006	3.3	minor CHO metabolism.sugar alcohols	ribitol kinase, putative | chr4:14831861-14835214 FORWARD
BnaA10g07650D	-1.2735	3.3	minor CHO metabolism.sugar alcohols	sorbitol dehydrogenase, putative / L-iditol 2-dehydrogenase, putative | chr5:21111445-21113403 FORWARD
BnaC07g42540D	-1.81485	3.3	minor CHO metabolism.sugar alcohols	ribitol kinase, putative | chr4:14831861-14835214 FORWARD
BnaC08g01450D	-2.80353	3.3	minor CHO metabolism.sugar alcohols	sorbitol dehydrogenase, putative / L-iditol 2-dehydrogenase, putative | chr5:21111445-21113403 FORWARD
BnaA01g16600D	-1.66368	3.5	minor CHO metabolism.others	pfkB-type carbohydrate kinase family protein | chr4:13782515-13785112 REVERSE
BnaA01g27130D	-1.71027	3.5	minor CHO metabolism.others	aldose 1-epimerase family protein | chr3:6143519-6145337 REVERSE
BnaA03g04930D	-2.30812	3.5	minor CHO metabolism.others	aldose 1-epimerase family protein | chr5:4674233-4676765 REVERSE
BnaA03g10320D	-1.64207	3.5	minor CHO metabolism.others	aldose 1-epimerase family protein | chr5:23218214-23221089 FORWARD
BnaA03g12740D	-2.87603	3.5	minor CHO metabolism.others	sugar isomerase (SIS) domain-containing protein | chr5:21201730-21202543 REVERSE
BnaA05g06800D	-2.00293	3.5	minor CHO metabolism.others	aldo/keto reductase family protein | chr2:15838764-15840932 FORWARD
BnaA05g16180D	-1.84189	3.5	minor CHO metabolism.others	pfkB-type carbohydrate kinase family protein | chr1:18264971-18267270 FORWARD
BnaA05g22280D	-1.05376	3.5	minor CHO metabolism.others	aldose 1-epimerase family protein | chr3:6143519-6145337 REVERSE
BnaA05g22480D	-1.03793	3.5	minor CHO metabolism.others	dihydroxyacetone kinase family protein | chr3:6081671-6086138 REVERSE
BnaA06g00510D	-2.21058	3.5	minor CHO metabolism.others	Symbols: ATFRUCT5, AtcwINV3 | ATFRUCT5 (BETA-FRUCTOFURANOSIDASE 5); hydrolase, hydrolyzing O-glycosyl compounds / levanase | chr1:20566598-20569286 FORWARD
BnaA06g17140D	-2.47386	3.5	minor CHO metabolism.others	aldose 1-epimerase family protein | chr3:17634810-17637204 FORWARD
BnaA08g03250D	-1.95061	3.5	minor CHO metabolism.others	dihydroxyacetone kinase family protein | chr1:17902636-17906806 REVERSE
BnaA09g43270D	-1.06842	3.5	minor CHO metabolism.others	mannose 6-phosphate reductase (NADPH-dependent), putative | chr2:9103207-9105187 REVERSE
BnaA10g06870D	-1.42141	3.5	minor CHO metabolism.others	aldo/keto reductase family protein | chr5:21765054-21767000 REVERSE
BnaA10g11380D	-1.25196	3.5	minor CHO metabolism.others	aldose 1-epimerase family protein | chr5:23218214-23221089 FORWARD
BnaA10g26340D	-1.82312	3.5	minor CHO metabolism.others	3-deoxy-D-manno-octulosonic acid transferase-related | chr5:995160-997848 FORWARD
BnaAnng08710D	-2.76982	3.5	minor CHO metabolism.others	carbohydrate kinase family | chr5:6426071-6428467 REVERSE
BnaAnng29390D	-1.64425	3.5	minor CHO metabolism.others	haloacid dehalogenase-like hydrolase family protein | chr5:21860997-21864926 REVERSE
BnaC01g34580D	-1.3429	3.5	minor CHO metabolism.others	aldose 1-epimerase family protein | chr3:6143519-6145337 REVERSE
BnaC02g08550D	-2.39386	3.5	minor CHO metabolism.others	carbohydrate kinase family | chr5:6426071-6428467 REVERSE
BnaC02g11600D	-1.56084	3.5	minor CHO metabolism.others	aldose 1-epimerase family protein | chr5:23218214-23221089 FORWARD
BnaC02g14030D	-1.03812	3.5	minor CHO metabolism.others	haloacid dehalogenase-like hydrolase family protein | chr5:21860997-21864926 REVERSE
BnaC03g57220D	-1.88818	3.5	minor CHO metabolism.others	aldose 1-epimerase family protein | chr3:17634810-17637204 FORWARD
BnaC04g30550D	-1.02133	3.5	minor CHO metabolism.others	Symbols: SOS4, ATSOS4 | SOS4 (SALT OVERLY SENSITIVE 4); kinase/ pyridoxal kinase | chr5:15065374-15068999 FORWARD
BnaC04g53480D	-1.39563	3.5	minor CHO metabolism.others	aldo/keto reductase family protein | chr2:15838764-15840932 FORWARD
BnaC05g13340D	-2.19198	3.5	minor CHO metabolism.others	pfkB-type carbohydrate kinase family protein | chr1:5867635-5869356 FORWARD
BnaC05g26130D	-1.12363	3.5	minor CHO metabolism.others	pfkB-type carbohydrate kinase family protein | chr1:18264971-18267270 FORWARD
BnaC05g35520D	-1.51046	3.5	minor CHO metabolism.others	aldose 1-epimerase family protein | chr3:6143519-6145337 REVERSE
BnaC06g07120D	-1.87564	3.5	minor CHO metabolism.others	Symbols: ATFRUCT5, AtcwINV3 | ATFRUCT5 (BETA-FRUCTOFURANOSIDASE 5); hydrolase, hydrolyzing O-glycosyl compounds / levanase | chr1:20566598-20569286 FORWARD
BnaC07g17460D	-2.01673	3.5	minor CHO metabolism.others	pfkB-type carbohydrate kinase family protein | chr5:17667310-17670239 REVERSE
BnaC07g50370D	-1.78027	3.5	minor CHO metabolism.others	pfkB-type carbohydrate kinase family protein | chr4:13782515-13785112 REVERSE
BnaC08g03580D	-3.70936	3.5	minor CHO metabolism.others	dihydroxyacetone kinase family protein | chr1:17902636-17906806 REVERSE
BnaC09g32880D	-1.50901	3.5	minor CHO metabolism.others	aldose 1-epimerase family protein | chr5:23218214-23221089 FORWARD
BnaC06g42870D	2.60609	3.5	minor CHO metabolism.others	aldose 1-epimerase family protein | chr3:22799027-22801205 FORWARD
BnaCnng68220D	1.5119	3.5	minor CHO metabolism.others	pfkB-type carbohydrate kinase family protein | chr1:5867635-5869356 FORWARD
BnaC03g72040D	3.15295	3.5	minor CHO metabolism.others	aldo/keto reductase family protein | chr2:15834867-15836881 FORWARD
BnaC04g53580D	4.14132	3.5	minor CHO metabolism.others	aldo/keto reductase family protein | chr2:15831854-15833920 FORWARD
BnaA03g17400D	1.07577	3.5	minor CHO metabolism.others	aldo/keto reductase family protein | chr2:15834867-15836881 FORWARD
BnaA03g46210D	1.18506	3.5	minor CHO metabolism.others	aldose 1-epimerase family protein | chr4:12362484-12365098 FORWARD
BnaA05g06810D	-1.79949	3.5	minor CHO metabolism.others	aldo/keto reductase family protein | chr2:15834867-15836881 FORWARD
BnaA06g13780D	-1.41741	3.5	minor CHO metabolism.others	pfkB-type carbohydrate kinase family protein | chr1:6778988-6781173 FORWARD
BnaA07g38160D	1.02418	3.5	minor CHO metabolism.others	aldose 1-epimerase family protein | chr3:22799027-22801205 FORWARD
BnaA10g04400D	-1.52138	3.5	minor CHO metabolism.others	pfkB-type carbohydrate kinase family protein | chr1:2067529-2070446 FORWARD
BnaA10g29530D	-1.22108	3.5	minor CHO metabolism.others	pfkB-type carbohydrate kinase family protein | chr5:23723404-23725465 REVERSE
BnaAnng23250D	-1.09799	3.5	minor CHO metabolism.others	carbohydrate kinase family | chr5:6426071-6428467 REVERSE
BnaC01g01890D	-2.62236	3.5	minor CHO metabolism.others	aldose 1-epimerase family protein | chr4:13161346-13163636 FORWARD
BnaC03g09500D	-1.41951	3.5	minor CHO metabolism.others	carbohydrate kinase family | chr5:6426071-6428467 REVERSE
BnaC04g53550D	1.06823	3.5	minor CHO metabolism.others	aldo/keto reductase family protein | chr2:15831854-15833920 FORWARD
BnaC08g35890D	-1.39008	3.5	minor CHO metabolism.others	mannose 6-phosphate reductase (NADPH-dependent), putative | chr2:9103207-9105187 REVERSE
BnaCnng02580D	-1.47508	3.5	minor CHO metabolism.others	3-deoxy-D-manno-octulosonic acid transferase-related | chr5:995160-997848 FORWARD
BnaCnng55890D	-1.21221	3.5	minor CHO metabolism.others	haloacid dehalogenase-like hydrolase family protein | chr5:21860997-21864926 REVERSE
BnaA03g39980D	-3.84749	3.6	minor CHO metabolism.callose	Symbols: PDCB1 | PDCB1 (PLASMODESMATA CALLOSE-BINDING PROTEIN 1); callose binding / polysaccharide binding | chr5:24587213-24589580 REVERSE
BnaA05g11020D	-1.97414	3.6	minor CHO metabolism.callose	Symbols: ATGSL03, GSL03, ATGSL3 | ATGSL03 (GLUCAN SYNTHASE-LIKE 3); 1,3-beta-glucan synthase/ transferase, transferring glycosyl groups | chr2:13589545-13600066 FORWARD
BnaA09g05600D	-4.03671	3.6	minor CHO metabolism.callose	Symbols: PDCB1 | PDCB1 (PLASMODESMATA CALLOSE-BINDING PROTEIN 1); callose binding / polysaccharide binding | chr5:24587213-24589580 REVERSE
BnaA09g20050D	-4.09311	3.6	minor CHO metabolism.callose	Symbols: ATGSL1, ATGSL01, GSL01, GSL1 | GSL1 (GLUCAN SYNTHASE-LIKE 1); 1,3-beta-glucan synthase/ transferase, transferring glycosyl groups | chr4:2537039-2543131 FORWARD
BnaA09g20060D	-3.98263	3.6	minor CHO metabolism.callose	Symbols: ATGSL1, ATGSL01, GSL01, GSL1 | GSL1 (GLUCAN SYNTHASE-LIKE 1); 1,3-beta-glucan synthase/ transferase, transferring glycosyl groups | chr4:2537039-2543131 FORWARD
BnaA10g20270D	-1.08947	3.6	minor CHO metabolism.callose	Symbols: ATGSL12, gsl12 | ATGSL12 (glucan synthase-like 12); 1,3-beta-glucan synthase/ transferase, transferring glycosyl groups | chr5:4110295-4121427 REVERSE
BnaC02g04450D	-1.77595	3.6	minor CHO metabolism.callose	Symbols: ATGSL12, gsl12 | ATGSL12 (glucan synthase-like 12); 1,3-beta-glucan synthase/ transferase, transferring glycosyl groups | chr5:4110295-4121427 REVERSE
BnaC02g42010D	-1.54971	3.6	minor CHO metabolism.callose	Symbols: PDCB1 | PDCB1 (PLASMODESMATA CALLOSE-BINDING PROTEIN 1); callose binding / polysaccharide binding | chr5:24587213-24589580 REVERSE
BnaC04g12720D	-1.47271	3.6	minor CHO metabolism.callose	Symbols: ATGSL03, GSL03, ATGSL3 | ATGSL03 (GLUCAN SYNTHASE-LIKE 3); 1,3-beta-glucan synthase/ transferase, transferring glycosyl groups | chr2:13589545-13600066 FORWARD
BnaC05g03680D	-1.14164	3.6	minor CHO metabolism.callose	Symbols: CALS1, GSL06, ATGSL6, ATGSL06, GSL6 | CALS1 (CALLOSE SYNTHASE 1); 1,3-beta-glucan synthase/ transferase, transferring glycosyl groups | chr1:1647706-1658686 REVERSE
BnaC09g05160D	-3.75249	3.6	minor CHO metabolism.callose	Symbols: PDCB1 | PDCB1 (PLASMODESMATA CALLOSE-BINDING PROTEIN 1); callose binding / polysaccharide binding | chr5:24587213-24589580 REVERSE
BnaC09g22380D	-2.38841	3.6	minor CHO metabolism.callose	Symbols: ATGSL1, ATGSL01, GSL01, GSL1 | GSL1 (GLUCAN SYNTHASE-LIKE 1); 1,3-beta-glucan synthase/ transferase, transferring glycosyl groups | chr4:2537039-2543131 FORWARD
BnaC09g22390D	-2.82936	3.6	minor CHO metabolism.callose	Symbols: ATGSL1, ATGSL01, GSL01, GSL1 | GSL1 (GLUCAN SYNTHASE-LIKE 1); 1,3-beta-glucan synthase/ transferase, transferring glycosyl groups | chr4:2537039-2543131 FORWARD
BnaC09g44080D	-2.04209	3.6	minor CHO metabolism.callose	Symbols: ATGSL12, gsl12 | ATGSL12 (glucan synthase-like 12); 1,3-beta-glucan synthase/ transferase, transferring glycosyl groups | chr5:4110295-4121427 REVERSE
BnaA02g01360D	-1.24084	3.6	minor CHO metabolism.callose	Symbols: ATGSL12, gsl12 | ATGSL12 (glucan synthase-like 12); 1,3-beta-glucan synthase/ transferase, transferring glycosyl groups | chr5:4110295-4121427 REVERSE
BnaAnng06790D	-2.83577	3.6	minor CHO metabolism.callose	Symbols: PDCB1 | PDCB1 (PLASMODESMATA CALLOSE-BINDING PROTEIN 1); callose binding / polysaccharide binding | chr5:24587213-24589580 REVERSE
BnaC05g52230D	1.03089	3.6	minor CHO metabolism.callose	Symbols: ATGSL10, gsl10 | ATGSL10 (glucan synthase-like 10); 1,3-beta-glucan synthase | chr3:2264945-2279383 REVERSE
BnaC07g31020D	-4.04148	3.6	minor CHO metabolism.callose	Symbols: PDCB1 | PDCB1 (PLASMODESMATA CALLOSE-BINDING PROTEIN 1); callose binding / polysaccharide binding | chr5:24587213-24589580 REVERSE
BnaA06g17680D	-1.21317	3.7	minor CHO metabolism.sugar kinases	xylulose kinase, putative | chr5:20152781-20155768 FORWARD
BnaC03g56330D	-1.45149	3.7	minor CHO metabolism.sugar kinases	xylulose kinase, putative | chr5:20152781-20155768 FORWARD
BnaA01g17800D	3.04731	5.1	fermentation.LDH	L-lactate dehydrogenase, putative | chr4:9673991-9675448 FORWARD
BnaC01g21080D	-2.22239	5.1	fermentation.LDH	L-lactate dehydrogenase, putative | chr4:9673991-9675448 FORWARD
BnaC09g31460D	2.5663	5.2	fermentation.PDC	Symbols: PDC2 | PDC2 (pyruvate decarboxylase-2); carboxy-lyase/ catalytic/ magnesium ion binding / pyruvate decarboxylase/ thiamin pyrophosphate binding | chr5:22310687-22312761 REVERSE
BnaA10g09270D	2.82492	5.2	fermentation.PDC	Symbols: PDC2 | PDC2 (pyruvate decarboxylase-2); carboxy-lyase/ catalytic/ magnesium ion binding / pyruvate decarboxylase/ thiamin pyrophosphate binding | chr5:22310687-22312761 REVERSE
BnaCnng03960D	8.00375	5.2	fermentation.PDC	pyruvate decarboxylase, putative | chr4:15952289-15954771 REVERSE
BnaA07g33310D	1.96982	5.3	fermentation.ADH	Symbols: ADH1, ADH, ATADH, ATADH1 | ADH1 (ALCOHOL DEHYDROGENASE 1); alcohol dehydrogenase | chr1:28975394-28977417 FORWARD
BnaC06g21150D	2.06436	5.3	fermentation.ADH	Symbols: ADH1, ADH, ATADH, ATADH1 | ADH1 (ALCOHOL DEHYDROGENASE 1); alcohol dehydrogenase | chr1:28975394-28977417 FORWARD
BnaC06g37860D	1.16848	5.3	fermentation.ADH	Symbols: ADH1, ADH, ATADH, ATADH1 | ADH1 (ALCOHOL DEHYDROGENASE 1); alcohol dehydrogenase | chr1:28975394-28977417 FORWARD
BnaA05g03050D	-1.32595	6.1	gluconeogenesis / glyoxylate cycle.citrate synthase	Symbols: CSY3 | CSY3 (citrate synthase 3); citrate (SI)-synthase | chr2:17801471-17806049 REVERSE
BnaA07g08220D	-2.74392	6.1	gluconeogenesis / glyoxylate cycle.citrate synthase	Symbols: CSY3 | CSY3 (citrate synthase 3); citrate (SI)-synthase | chr2:17801471-17806049 REVERSE
BnaAnng00830D	-7.46489	6.2	gluconeogenesis / glyoxylate cycle.malate synthase	Symbols: MLS | MLS (MALATE SYNTHASE); malate synthase | chr5:1032103-1034570 REVERSE
BnaAnng41760D	-6.05045	6.2	gluconeogenesis / glyoxylate cycle.malate synthase	Symbols: MLS | MLS (MALATE SYNTHASE); malate synthase | chr5:1032103-1034570 REVERSE
BnaA04g13230D	-1.09314	6.3	gluconeogenesis / glyoxylate cycle.Malate DH	Symbols: PMDH1 | PMDH1 (PEROXISOMAL NAD-MALATE DEHYDROGENASE 1); L-malate dehydrogenase/ binding / catalytic/ malate dehydrogenase/ oxidoreductase/ oxidoreductase, acting on the CH-OH group of donors, NAD or NADP as acceptor | chr2:9689415-9692154 REVERSE
BnaC07g46800D	-3.79099	6.4	gluconeogenesis / glyoxylate cycle.PEPCK	Symbols: PCK1, PEPCK | PCK1 (PHOSPHOENOLPYRUVATE CARBOXYKINASE 1); ATP binding / phosphoenolpyruvate carboxykinase (ATP)/ phosphoenolpyruvate carboxykinase/ purine nucleotide binding | chr4:17802694-17806539 REVERSE
BnaA06g24600D	4.34577	6.4	gluconeogenesis / glyoxylate cycle.PEPCK	Symbols: PCK2, PEPCK | PCK2 (PHOSPHOENOLPYRUVATE CARBOXYKINASE 2); ATP binding / phosphoenolpyruvate carboxykinase (ATP)/ phosphoenolpyruvate carboxykinase/ purine nucleotide binding | chr5:26266340-26269616 FORWARD
BnaCnng13230D	4.05889	6.4	gluconeogenesis / glyoxylate cycle.PEPCK	Symbols: PCK2, PEPCK | PCK2 (PHOSPHOENOLPYRUVATE CARBOXYKINASE 2); ATP binding / phosphoenolpyruvate carboxykinase (ATP)/ phosphoenolpyruvate carboxykinase/ purine nucleotide binding | chr5:26266340-26269616 FORWARD
BnaA01g00210D	-1.28547	6.4	gluconeogenesis / glyoxylate cycle.PEPCK	Symbols: PCK1, PEPCK | PCK1 (PHOSPHOENOLPYRUVATE CARBOXYKINASE 1); ATP binding / phosphoenolpyruvate carboxykinase (ATP)/ phosphoenolpyruvate carboxykinase/ purine nucleotide binding | chr4:17802694-17806539 REVERSE
BnaA03g54330D	-3.27716	6.4	gluconeogenesis / glyoxylate cycle.PEPCK	Symbols: PCK1, PEPCK | PCK1 (PHOSPHOENOLPYRUVATE CARBOXYKINASE 1); ATP binding / phosphoenolpyruvate carboxykinase (ATP)/ phosphoenolpyruvate carboxykinase/ purine nucleotide binding | chr4:17802694-17806539 REVERSE
BnaA01g18440D	1.57947	6.5	gluconeogenesis / glyoxylate cycle.pyruvate dikinase	Symbols: PPDK | PPDK (pyruvate orthophosphate dikinase); kinase/ pyruvate, phosphate dikinase | chr4:8864828-8870801 REVERSE
BnaCnng27780D	2.68489	6.5	gluconeogenesis / glyoxylate cycle.pyruvate dikinase	Symbols: PPDK | PPDK (pyruvate orthophosphate dikinase); kinase/ pyruvate, phosphate dikinase | chr4:8864828-8870801 REVERSE
BnaUnng05120D	2.62149	6.5	gluconeogenesis / glyoxylate cycle.pyruvate dikinase	Symbols: PPDK | PPDK (pyruvate orthophosphate dikinase); kinase/ pyruvate, phosphate dikinase | chr4:8864828-8870801 REVERSE
BnaA01g18450D	1.07462	6.5	gluconeogenesis / glyoxylate cycle.pyruvate dikinase	Symbols: PPDK | PPDK (pyruvate orthophosphate dikinase); kinase/ pyruvate, phosphate dikinase | chr4:8864828-8870801 REVERSE
BnaA03g41960D	1.43227	6.5	gluconeogenesis / glyoxylate cycle.pyruvate dikinase	Symbols: PPDK | PPDK (pyruvate orthophosphate dikinase); kinase/ pyruvate, phosphate dikinase | chr4:8864828-8870801 REVERSE
BnaA09g19760D	-1.18561	7.3	OPP.electron transfer	Symbols: ATRFNR1 | ATRFNR1 (ROOT FNR 1); FAD binding / NADP or NADPH binding / electron carrier/ ferredoxin-NADP+ reductase/ oxidoreductase | chr4:2738715-2740655 REVERSE
BnaA09g26030D	-1.1866	7.3	OPP.electron transfer	Symbols: ATRFNR2 | ATRFNR2 (ROOT FNR 2); FAD binding / NADP or NADPH binding / electron carrier/ ferredoxin-NADP+ reductase/ oxidoreductase | chr1:10806985-10809180 REVERSE
BnaC09g21770D	-1.16382	7.3	OPP.electron transfer	Symbols: ATRFNR1 | ATRFNR1 (ROOT FNR 1); FAD binding / NADP or NADPH binding / electron carrier/ ferredoxin-NADP+ reductase/ oxidoreductase | chr4:2738715-2740655 REVERSE
BnaA04g15880D	1.16223	7.3	OPP.electron transfer	Symbols: ATFD3 | ATFD3 (ferredoxin 3); 2 iron, 2 sulfur cluster binding / electron carrier/ iron-sulfur cluster binding | chr2:11758079-11759476 REVERSE
BnaC03g75370D	-1.75417	7.3	OPP.electron transfer	Symbols: ATRFNR2 | ATRFNR2 (ROOT FNR 2); FAD binding / NADP or NADPH binding / electron carrier/ ferredoxin-NADP+ reductase/ oxidoreductase | chr1:10806985-10809180 REVERSE
BnaC04g39140D	1.75105	7.3	OPP.electron transfer	Symbols: ATFD3 | ATFD3 (ferredoxin 3); 2 iron, 2 sulfur cluster binding / electron carrier/ iron-sulfur cluster binding | chr2:11758079-11759476 REVERSE
BnaC07g44310D	1.72156	8.3	TCA / org transformation.carbonic anhydrases	Symbols: ATBCA5, BCA5 | carbonic anhydrase family protein / carbonate dehydratase family protein | chr4:16138360-16141624 FORWARD
BnaC03g66520D	1.66922	8.3	TCA / org transformation.carbonic anhydrases	Symbols: ATBCA5, BCA5 | carbonic anhydrase family protein / carbonate dehydratase family protein | chr4:16138360-16141624 FORWARD
BnaA08g11540D	1.80652	8.3	TCA / org transformation.carbonic anhydrases	Symbols: ATBCA5, BCA5 | carbonic anhydrase family protein / carbonate dehydratase family protein | chr4:16138360-16141624 FORWARD
BnaA05g33810D	1.06887	8.3	TCA / org transformation.carbonic anhydrases	Symbols: CA1 | CA1 (CARBONIC ANHYDRASE 1); carbonate dehydratase/ zinc ion binding | chr3:194724-198019 REVERSE
BnaA06g04110D	-1.48313	8.3	TCA / org transformation.carbonic anhydrases	Symbols: ATBCA3, BCA3 | BCA3 (BETA CARBONIC ANHYDRASE 4); carbonate dehydratase/ zinc ion binding | chr1:8395557-8398144 FORWARD
BnaC02g05730D	-1.06164	8.3	TCA / org transformation.carbonic anhydrases	Symbols: CA2, CA18, BETA CA2 | CA2 (CARBONIC ANHYDRASE 2); carbonate dehydratase/ zinc ion binding | chr5:4757972-4762615 FORWARD
BnaC03g17150D	-4.35364	8.3	TCA / org transformation.carbonic anhydrases	Symbols: ATACA7, ACA7 | ACA7 (ALPHA CARBONIC ANHYDRASE 7); carbonate dehydratase/ zinc ion binding | chr1:2516991-2518546 REVERSE
BnaCnng31770D	-1.63412	8.3	TCA / org transformation.carbonic anhydrases	Symbols: ATBCA4, BCA4 | carbonic anhydrase, putative / carbonate dehydratase, putative | chr1:26533926-26538333 REVERSE
BnaA01g02470D	-1.08228	9	mitochondrial electron transport / ATP synthesis	complex 1 family protein / LVR family protein | chr4:16556825-16558846 FORWARD
BnaC04g02910D	-1.11964	9.3	mitochondrial electron transport / ATP synthesis.electron transfer flavoprotein	Symbols: ETFQO | ETFQO (electron-transfer flavoprotein:ubiquinone oxidoreductase); catalytic/ electron carrier/ electron-transferring-flavoprotein dehydrogenase | chr2:18021180-18025292 FORWARD
BnaA03g36620D	2.22788	9.4	mitochondrial electron transport / ATP synthesis.alternative oxidase	Symbols: AOX1A, ATAOX1A | AOX1A (ALTERNATIVE OXIDASE 1A); alternative oxidase | chr3:7906791-7908740 FORWARD
BnaC05g30210D	1.06435	9.4	mitochondrial electron transport / ATP synthesis.alternative oxidase	Symbols: AOX1A, ATAOX1A | AOX1A (ALTERNATIVE OXIDASE 1A); alternative oxidase | chr3:7906791-7908740 FORWARD
BnaCnng63430D	1.31469	9.4	mitochondrial electron transport / ATP synthesis.alternative oxidase	Symbols: AOX1A, ATAOX1A | AOX1A (ALTERNATIVE OXIDASE 1A); alternative oxidase | chr3:7906791-7908740 FORWARD
BnaAnng23570D	-1.54256	9.5	mitochondrial electron transport / ATP synthesis.cytochrome c reductase	unknown protein | chr1:13700814-13701632 FORWARD
BnaC01g25020D	-1.58601	9.5	mitochondrial electron transport / ATP synthesis.cytochrome c reductase	unknown protein | chr1:13700814-13701632 FORWARD
BnaA01g04540D	-1.37978	9.5	mitochondrial electron transport / ATP synthesis.cytochrome c reductase	ubiquinol-cytochrome C reductase complex 14 kDa protein, putative | chr4:15669219-15671194 REVERSE
BnaA01g31400D	-1.00374	9.5	mitochondrial electron transport / ATP synthesis.cytochrome c reductase	ubiquinol-cytochrome C reductase complex ubiquinone-binding protein, putative / ubiquinol-cytochrome C reductase complex 8.2 kDa protein, putative | chr3:3399736-3400741 FORWARD
BnaA02g01630D	1.45834	9.5	mitochondrial electron transport / ATP synthesis.cytochrome c reductase	ubiquinol-cytochrome C reductase iron-sulfur subunit, mitochondrial, putative / Rieske iron-sulfur protein, putative | chr5:4308129-4310181 REVERSE
BnaA02g27180D	-1.23681	9.5	mitochondrial electron transport / ATP synthesis.cytochrome c reductase	ubiquinol-cytochrome C reductase complex 7.8 kDa protein, putative / mitochondrial hinge protein, putative | chr1:5202648-5204193 FORWARD
BnaA05g15690D	-2.13852	9.5	mitochondrial electron transport / ATP synthesis.cytochrome c reductase	unknown protein | chr1:13700814-13701632 FORWARD
BnaA05g28070D	-1.1575	9.5	mitochondrial electron transport / ATP synthesis.cytochrome c reductase	ubiquinol-cytochrome C reductase complex ubiquinone-binding protein, putative / ubiquinol-cytochrome C reductase complex 8.2 kDa protein, putative | chr3:3399736-3400741 FORWARD
BnaA06g38290D	-1.3661	9.5	mitochondrial electron transport / ATP synthesis.cytochrome c reductase	ubiquinol-cytochrome C reductase complex 7.8 kDa protein, putative / mitochondrial hinge protein, putative | chr1:5202648-5204193 FORWARD
BnaC02g04750D	-1.11019	9.5	mitochondrial electron transport / ATP synthesis.cytochrome c reductase	ubiquinol-cytochrome C reductase iron-sulfur subunit, mitochondrial, putative / Rieske iron-sulfur protein, putative | chr5:4308129-4310181 REVERSE
BnaC03g05860D	1.36497	9.5	mitochondrial electron transport / ATP synthesis.cytochrome c reductase	ubiquinol-cytochrome C reductase iron-sulfur subunit, mitochondrial, putative / Rieske iron-sulfur protein, putative | chr5:4305125-4307513 REVERSE
BnaC04g27940D	1.59193	9.5	mitochondrial electron transport / ATP synthesis.cytochrome c reductase	ubiquinol-cytochrome C reductase UQCRX/QCR9-like family protein | chr3:19542931-19544264 REVERSE
BnaA03g24240D	1.86761	9.6	mitochondrial electron transport / ATP synthesis.cytochrome c	Symbols: CYTC-2 | CYTC-2 (cytochrome c-2); electron carrier/ heme binding / iron ion binding | chr4:6276998-6278509 FORWARD
BnaC03g28810D	2.43732	9.6	mitochondrial electron transport / ATP synthesis.cytochrome c	Symbols: CYTC-2 | CYTC-2 (cytochrome c-2); electron carrier/ heme binding / iron ion binding | chr4:6276998-6278509 FORWARD
BnaC08g16550D	-1.83611	9.6	mitochondrial electron transport / ATP synthesis.cytochrome c	Symbols: ATCCMH, CCMH | CCMH; oxidoreductase | chr1:5240199-5241538 REVERSE
BnaA08g20820D	-2.06609	9.7	mitochondrial electron transport / ATP synthesis.cytochrome c oxidase	Symbols: COX6B, ATCOX6B2 | COX6B (CYTOCHROME C OXIDASE 6B); cytochrome-c oxidase | chr1:7925121-7927278 FORWARD
BnaC01g34600D	-1.84699	9.7	mitochondrial electron transport / ATP synthesis.cytochrome c oxidase	Symbols: SURF1 | SURF1 (SURFEIT 1) | chr3:6133528-6136371 FORWARD
BnaC03g71360D	-2.21527	9.7	mitochondrial electron transport / ATP synthesis.cytochrome c oxidase	cytochrome c oxidase assembly protein CtaG / Cox11 family | chr1:490925-492926 FORWARD
BnaC06g18510D	-1.45495	9.7	mitochondrial electron transport / ATP synthesis.cytochrome c oxidase	cytochrome c oxidase subunit Vc, putative / COX5C, putative | chr5:24653422-24654860 REVERSE
BnaC08g05980D	-2.58695	9.7	mitochondrial electron transport / ATP synthesis.cytochrome c oxidase	Symbols: COX6B, ATCOX6B2 | COX6B (CYTOCHROME C OXIDASE 6B); cytochrome-c oxidase | chr1:7925121-7927278 FORWARD
BnaC09g15780D	-2.72322	9.7	mitochondrial electron transport / ATP synthesis.cytochrome c oxidase	membrane bound O-acyl transferase (MBOAT) family protein | chr1:21330512-21334727 REVERSE
BnaA10g01110D	4.66297	9.7	mitochondrial electron transport / ATP synthesis.cytochrome c oxidase	cytochrome c oxidase assembly protein CtaG / Cox11 family | chr1:490925-492926 FORWARD
BnaC05g07220D	3.92057	9.7	mitochondrial electron transport / ATP synthesis.cytochrome c oxidase	Cox19 family protein (CHCH motif); CONTAINS InterPro DOMAIN/s: MTCP1 (InterPro:IPR009069).
BnaA01g27150D	-2.03613	9.7	mitochondrial electron transport / ATP synthesis.cytochrome c oxidase	Symbols: SURF1 | SURF1 (SURFEIT 1) | chr3:6133528-6136371 FORWARD
BnaA01g37030D	-1.26412	9.7	mitochondrial electron transport / ATP synthesis.cytochrome c oxidase	cytochrome c oxidase family protein | chr3:5299110-5301745 FORWARD
BnaA09g15210D	-1.87447	9.7	mitochondrial electron transport / ATP synthesis.cytochrome c oxidase	membrane bound O-acyl transferase (MBOAT) family protein | chr1:21330512-21334727 REVERSE
BnaC01g20600D	-1.15754	9.7	mitochondrial electron transport / ATP synthesis.cytochrome c oxidase	cytochrome c oxidase subunit 6b, putative | chr5:23426668-23427856 FORWARD
BnaC01g35940D	8.02237	9.7	mitochondrial electron transport / ATP synthesis.cytochrome c oxidase	cytochrome c oxidase family protein | chr3:5299110-5301745 FORWARD
BnaC03g36280D	-4	9.7	mitochondrial electron transport / ATP synthesis.cytochrome c oxidase	electron transport SCO1/SenC family protein | chr3:2727215-2729601 FORWARD
BnaC04g00250D	-3.43463	9.7	mitochondrial electron transport / ATP synthesis.cytochrome c oxidase	cytochrome c oxidase subunit Vc, putative / COX5C, putative | chr5:24653422-24654860 REVERSE
BnaC05g35580D	-1.36678	9.7	mitochondrial electron transport / ATP synthesis.cytochrome c oxidase	Symbols: SURF1 | SURF1 (SURFEIT 1) | chr3:6133528-6136371 FORWARD
BnaC05g37720D	-1.14098	9.7	mitochondrial electron transport / ATP synthesis.cytochrome c oxidase	cytochrome c oxidase family protein | chr3:5299110-5301745 FORWARD
BnaC07g41190D	2.7619	9.7	mitochondrial electron transport / ATP synthesis.cytochrome c oxidase	cytochrome c oxidase subunit 6b, putative | chr5:23426668-23427856 FORWARD
BnaA01g13950D	-8.24482	9.8	mitochondrial electron transport / ATP synthesis.uncoupling protein	Symbols: DIC2 | mitochondrial substrate carrier family protein | chr4:12686459-12687650 FORWARD
BnaA02g07340D	-1.77285	9.8	mitochondrial electron transport / ATP synthesis.uncoupling protein	Symbols: ATUCP2 | ATUCP2 (UNCOUPLING PROTEIN 2); oxidative phosphorylation uncoupler | chr5:23808461-23811258 REVERSE
BnaA10g29330D	-3.62583	9.8	mitochondrial electron transport / ATP synthesis.uncoupling protein	Symbols: ATUCP2 | ATUCP2 (UNCOUPLING PROTEIN 2); oxidative phosphorylation uncoupler | chr5:23808461-23811258 REVERSE
BnaC01g16430D	-6.86792	9.8	mitochondrial electron transport / ATP synthesis.uncoupling protein	Symbols: DIC2 | mitochondrial substrate carrier family protein | chr4:12686459-12687650 FORWARD
BnaC09g34250D	-1.9187	9.8	mitochondrial electron transport / ATP synthesis.uncoupling protein	Symbols: ATUCP2 | ATUCP2 (UNCOUPLING PROTEIN 2); oxidative phosphorylation uncoupler | chr5:23808461-23811258 REVERSE
BnaA07g16280D	-1.06185	9.8	mitochondrial electron transport / ATP synthesis.uncoupling protein	Symbols: ATPUMP1, UCP, PUMP1, ATUCP1, UCP1 | PUMP1 (PLANT UNCOUPLING MITOCHONDRIAL PROTEIN 1); binding / oxidative phosphorylation uncoupler | chr3:20038680-20041210 FORWARD
BnaA03g36100D	-1.09771	9.9	mitochondrial electron transport / ATP synthesis.F1-ATPase	ATP synthase epsilon chain, mitochondrial | chr1:19152615-19153929 FORWARD
BnaA03g47900D	-8.27612	9.9	mitochondrial electron transport / ATP synthesis.F1-ATPase	mitochondrial ATP synthase g subunit family protein | chr4:13281937-13283402 FORWARD
BnaA08g13400D	-1.88532	9.9	mitochondrial electron transport / ATP synthesis.F1-ATPase	mitochondrial ATP synthase g subunit family protein | chr4:14486041-14487777 REVERSE
BnaC01g32170D	-1.30537	9.9	mitochondrial electron transport / ATP synthesis.F1-ATPase	ATP synthase epsilon chain, mitochondrial | chr1:19152615-19153929 FORWARD
BnaC02g04350D	-1.59561	9.9	mitochondrial electron transport / ATP synthesis.F1-ATPase	unknown protein | chr5:4024314-4026741 REVERSE
BnaC02g04760D	-1.33565	9.9	mitochondrial electron transport / ATP synthesis.F1-ATPase	ATP synthase delta chain, mitochondrial, putative / H(+)-transporting two-sector ATPase, delta (OSCP) subunit, putative | chr5:4310314-4312048 REVERSE
BnaA03g02620D	-1.66235	9.9	mitochondrial electron transport / ATP synthesis.F1-ATPase	ATP synthase beta chain, mitochondrial, putative | chr5:2821928-2824966 FORWARD
BnaA03g03990D	9.38802	9.9	mitochondrial electron transport / ATP synthesis.F1-ATPase	unknown protein | chr5:4024314-4026741 REVERSE
BnaA03g04000D	-2.34023	9.9	mitochondrial electron transport / ATP synthesis.F1-ATPase	unknown protein | chr5:4024314-4026741 REVERSE
BnaA03g31830D	-3.15325	9.9	mitochondrial electron transport / ATP synthesis.F1-ATPase	anion-transporting ATPase family protein | chr5:24422735-24425492 FORWARD
BnaAnng06000D	-2.01641	9.9	mitochondrial electron transport / ATP synthesis.F1-ATPase	ATP synthase beta chain, mitochondrial, putative | chr5:2821928-2824966 FORWARD
BnaC02g33050D	-1.11645	9.9	mitochondrial electron transport / ATP synthesis.F1-ATPase	ATP synthase delta' chain, mitochondrial | chr5:19090298-19092314 FORWARD
BnaC03g41970D	-1.96936	9.9	mitochondrial electron transport / ATP synthesis.F1-ATPase	ATP synthase epsilon chain, mitochondrial | chr1:19152615-19153929 FORWARD
BnaC06g16530D	4.97728	9.9	mitochondrial electron transport / ATP synthesis.F1-ATPase	ATP synthase epsilon chain, mitochondrial | chr1:19152615-19153929 FORWARD
BnaC08g12140D	-1.05016	9.9	mitochondrial electron transport / ATP synthesis.F1-ATPase	mitochondrial ATP synthase g subunit family protein | chr4:13281937-13283402 FORWARD
BnaAnng29750D	-1.06324	9.99	mitochondrial electron transport / ATP synthesis.unspecified	coenzyme Q biosynthesis Coq4 family protein / ubiquinone biosynthesis Coq4 family protein | chr2:1121900-1123171 REVERSE
BnaC02g35100D	-2.45351	9.99	mitochondrial electron transport / ATP synthesis.unspecified	coenzyme Q biosynthesis Coq4 family protein / ubiquinone biosynthesis Coq4 family protein | chr2:1121900-1123171 REVERSE
BnaA09g52160D	1.68921	9.99	mitochondrial electron transport / ATP synthesis.unspecified	Symbols: ATABC1, ATATH10 | ATABC1 (ARABIDOPSIS THALIANA ABC TRANSPORTER 1); transporter | chr4:708544-711256 FORWARD
BnaC08g17290D	-2.2393	10.1	cell wall.precursor synthesis	unknown protein | chr1:5909249-5911693 REVERSE
BnaA03g42750D	-3.2598	10.2	cell wall.cellulose synthesis	Symbols: ATCSLA10, CSLA10 | ATCSLA10; cellulose synthase/ transferase, transferring glycosyl groups | chr1:8516238-8519734 REVERSE
BnaA06g31650D	-1.55138	10.2	cell wall.cellulose synthesis	Symbols: ATCSLC04, CSLC04, ATCSLC4, CSLC4 | ATCSLC04 (CELLULOSE-SYNTHASE LIKE C4); cellulose synthase/ transferase, transferring glycosyl groups | chr3:10505829-10509239 FORWARD
BnaA10g26350D	-1.1954	10.2	cell wall.cellulose synthesis	Symbols: ATCSLA09, CSLA09, ATCSLA9, CSLA9, RAT4 | ATCSLA09; mannan synthase/ transferase, transferring glycosyl groups | chr5:985675-990549 REVERSE
BnaC03g01390D	-2.01203	10.2	cell wall.cellulose synthesis	Symbols: ATCSLA09, CSLA09, ATCSLA9, CSLA9, RAT4 | ATCSLA09; mannan synthase/ transferase, transferring glycosyl groups | chr5:985675-990549 REVERSE
BnaC07g33890D	-3.16363	10.2	cell wall.cellulose synthesis	Symbols: ATCSLA10, CSLA10 | ATCSLA10; cellulose synthase/ transferase, transferring glycosyl groups | chr1:8516238-8519734 REVERSE
BnaC08g33880D	-1.74091	10.2	cell wall.cellulose synthesis	Symbols: ATCSLC08, CSLC08, ATCSLC8 | ATCSLC08; cellulose synthase/ transferase, transferring glycosyl groups | chr2:10471303-10474503 REVERSE
BnaCnng02590D	-1.16503	10.2	cell wall.cellulose synthesis	Symbols: ATCSLA09, CSLA09, ATCSLA9, CSLA9, RAT4 | ATCSLA09; mannan synthase/ transferase, transferring glycosyl groups | chr5:985675-990549 REVERSE
BnaA03g23250D	1.06931	10.2	cell wall.cellulose synthesis	Symbols: ATGH9A1, DEC, KOR, RSW2, IRX2, KOR1 | ATGH9A1 (ARABIDOPSIS THALIANA GLYCOSYL HYDROLASE 9A1); cellulase/ hydrolase, hydrolyzing O-glycosyl compounds | chr5:20197391-20200288 REVERSE
BnaA02g05470D	-2.33027	10.2	cell wall.cellulose synthesis	Symbols: PNT1 | PNT1 (PEANUT 1); alpha-1,4-mannosyltransferase/ mannosyltransferase/ transferase, transferring glycosyl groups | chr5:7337158-7340052 REVERSE
BnaA02g05900D	-2.04041	10.2	cell wall.cellulose synthesis	Symbols: ATCSLA02, CSLA02, ATCSLA2 | ATCSLA02; mannan synthase/ transferase, transferring glycosyl groups | chr5:7554928-7560073 REVERSE
BnaA03g05870D	-2.40718	10.2	cell wall.cellulose synthesis	Symbols: ATCSLA15, CSLA15 | ATCSLA15; cellulose synthase/ transferase, transferring glycosyl groups | chr4:7792219-7795824 REVERSE
BnaA03g51630D	2.02854	10.2	cell wall.cellulose synthesis	Symbols: ATCSLC05, CSLC05, ATCSLC5 | ATCSLC5 (CELLULOSE-SYNTHASE LIKE C5); cellulose synthase/ transferase, transferring glycosyl groups | chr4:15309506-15312591 REVERSE
BnaA10g18130D	-3.63472	10.2	cell wall.cellulose synthesis	Symbols: ATCSLA11, CSLA11 | ATCSLA11; cellulose synthase/ transferase, transferring glycosyl groups | chr5:5283550-5286293 REVERSE
BnaC07g25000D	-1.29716	10.2	cell wall.cellulose synthesis	Symbols: ATCSLC04, CSLC04, ATCSLC4, CSLC4 | ATCSLC04 (CELLULOSE-SYNTHASE LIKE C4); cellulose synthase/ transferase, transferring glycosyl groups | chr3:10505829-10509239 FORWARD
BnaC09g01620D	-9.55075	10.2	cell wall.cellulose synthesis	Symbols: ATCSLC04, CSLC04, ATCSLC4, CSLC4 | ATCSLC04 (CELLULOSE-SYNTHASE LIKE C4); cellulose synthase/ transferase, transferring glycosyl groups | chr3:10505829-10509239 FORWARD
BnaC09g01630D	-4.31579	10.2	cell wall.cellulose synthesis	Symbols: ATCSLC04, CSLC04, ATCSLC4, CSLC4 | ATCSLC04 (CELLULOSE-SYNTHASE LIKE C4); cellulose synthase/ transferase, transferring glycosyl groups | chr3:10505829-10509239 FORWARD
BnaC09g41630D	-1.82103	10.2	cell wall.cellulose synthesis	Symbols: ATCSLA15, CSLA15 | ATCSLA15; cellulose synthase/ transferase, transferring glycosyl groups | chr4:7792219-7795824 REVERSE
BnaA03g06300D	-2.76939	10.3	cell wall.hemicellulose synthesis	exostosin family protein | chr5:5551629-5554917 FORWARD
BnaA06g18540D	-2.074	10.3	cell wall.hemicellulose synthesis	exostosin family protein | chr3:16651963-16653678 FORWARD
BnaA10g17600D	-2.10932	10.3	cell wall.hemicellulose synthesis	exostosin family protein | chr5:5551629-5554917 FORWARD
BnaAnng37860D	-1.38397	10.3	cell wall.hemicellulose synthesis	exostosin family protein | chr3:16651963-16653678 FORWARD
BnaC05g10370D	-8.63178	10.3	cell wall.hemicellulose synthesis	Symbols: FUT8 | FUT8 (FUCOSYLTRANSFERASE 8); galactoside 2-alpha-L-fucosyltransferase | chr1:4827961-4829587 FORWARD
BnaC05g10380D	-7.46489	10.3	cell wall.hemicellulose synthesis	Symbols: FUT8 | FUT8 (FUCOSYLTRANSFERASE 8); galactoside 2-alpha-L-fucosyltransferase | chr1:4827961-4829587 FORWARD
BnaC06g23050D	-2.78496	10.3	cell wall.hemicellulose synthesis	Symbols: FUT3, ATFUT3 | FUT3 (FUCOSYLTRANSFERASE 3); fucosyltransferase/ transferase, transferring glycosyl groups | chr1:27967894-27969803 REVERSE
BnaC08g16010D	-3.80182	10.3	cell wall.hemicellulose synthesis	Symbols: FUT8 | FUT8 (FUCOSYLTRANSFERASE 8); galactoside 2-alpha-L-fucosyltransferase | chr1:4827961-4829587 FORWARD
BnaC08g39900D	-2.51096	10.3	cell wall.hemicellulose synthesis	Symbols: FUT8 | FUT8 (FUCOSYLTRANSFERASE 8); galactoside 2-alpha-L-fucosyltransferase | chr1:4827961-4829587 FORWARD
BnaC09g40970D	-2.09974	10.3	cell wall.hemicellulose synthesis	exostosin family protein | chr5:5551629-5554917 FORWARD
BnaA09g45830D	-2.57075	10.3	cell wall.hemicellulose synthesis	Symbols: FUT8 | FUT8 (FUCOSYLTRANSFERASE 8); galactoside 2-alpha-L-fucosyltransferase | chr1:4827961-4829587 FORWARD
BnaC03g74220D	1.17845	10.4	cell wall.pectin synthesis	Symbols: GAUT8, QUA1 | QUA1 (QUASIMODO 1); polygalacturonate 4-alpha-galacturonosyltransferase/ transferase, transferring glycosyl groups / transferase, transferring hexosyl groups | chr3:9154711-9156845 FORWARD
BnaA06g16460D	-2.54391	10.5	cell wall.cell wall proteins	Symbols: KING1 | KING1 (SNF1-RELATED PROTEIN KINASE REGULATORY SUBUNIT GAMMA 1) | chr3:17987378-17989763 FORWARD
BnaC08g48500D	-1.70759	10.5	cell wall.cell wall proteins	Symbols: KING1 | KING1 (SNF1-RELATED PROTEIN KINASE REGULATORY SUBUNIT GAMMA 1) | chr3:17987378-17989763 FORWARD
BnaC08g29550D	-1.10531	10.5	cell wall.cell wall proteins	unknown protein | chr3:21748228-21749928 FORWARD
BnaC09g05460D	-10.1799	10.6	cell wall.degradation	peptidoglycan-binding LysM domain-containing protein | chr5:24958241-24958769 FORWARD
BnaA02g33200D	2.3554	10.6	cell wall.degradation	peptidoglycan-binding LysM domain-containing protein | chr5:24958241-24958769 FORWARD
BnaA01g15000D	-3.33764	10.7	cell wall.modification	Symbols: XTR6, XTH23 | XTR6 (XYLOGLUCAN ENDOTRANSGLYCOSYLASE 6); hydrolase, acting on glycosyl bonds / hydrolase, hydrolyzing O-glycosyl compounds / xyloglucan:xyloglucosyl transferase | chr4:13128643-13129884 FORWARD
BnaA02g14330D	-11.3627	10.7	cell wall.modification	Symbols: ATEXPA1, EXP1, AT-EXP1, ATEXP1, ATHEXP ALPHA 1.2 | ATEXPA1 (ARABIDOPSIS THALIANA EXPANSIN A1) | chr1:26141836-26143496 FORWARD
BnaA02g14340D	-2.49139	10.7	cell wall.modification	Symbols: ATEXPA1, EXP1, AT-EXP1, ATEXP1, ATHEXP ALPHA 1.2 | ATEXPA1 (ARABIDOPSIS THALIANA EXPANSIN A1) | chr1:26141836-26143496 FORWARD
BnaA02g26670D	-1.43864	10.7	cell wall.modification	Symbols: ATEXPA15, EXP15, ATEXP15, ATHEXP ALPHA 1.3 | ATEXPA15 (ARABIDOPSIS THALIANA EXPANSIN A15) | chr2:916854-918643 REVERSE
BnaA03g19130D	-10.2605	10.7	cell wall.modification	Symbols: ATEXPA8, EXP8, ATEXP8, ATHEXP ALPHA 1.11 | ATEXPA8 (ARABIDOPSIS THALIANA EXPANSIN A8) | chr2:16948863-16950557 REVERSE
BnaA03g25760D	-2.26325	10.7	cell wall.modification	Symbols: XTH9 | XTH9 (XYLOGLUCAN ENDOTRANSGLUCOSYLASE/HYDROLASE 9); hydrolase, acting on glycosyl bonds / xyloglucan:xyloglucosyl transferase | chr4:1415949-1417327 FORWARD
BnaA03g54320D	-1.98013	10.7	cell wall.modification	xyloglucan:xyloglucosyl transferase, putative / xyloglucan endotransglycosylase, putative / endo-xyloglucan transferase, putative | chr4:17775474-17777397 REVERSE
BnaA03g58790D	-2.99896	10.7	cell wall.modification	Symbols: ATEXPB3, EXPB3, ATHEXP BETA 1.6 | ATEXPB3 (ARABIDOPSIS THALIANA EXPANSIN B3) | chr4:14000038-14002069 REVERSE
BnaA04g16780D	-2.96078	10.7	cell wall.modification	Symbols: ATEXPA6, ATEXP6, ATHEXP ALPHA 1.8 | ATEXPA6 (ARABIDOPSIS THALIANA EXPANSIN A6) | chr2:12431341-12433595 REVERSE
BnaA05g01790D	-3.6934	10.7	cell wall.modification	Symbols: ATEXPA8, EXP8, ATEXP8, ATHEXP ALPHA 1.11 | ATEXPA8 (ARABIDOPSIS THALIANA EXPANSIN A8) | chr2:16948863-16950557 REVERSE
BnaA05g16360D	-3.11974	10.7	cell wall.modification	Symbols: XTR4, XTH30 | XTR4 (XYLOGLUCAN ENDOTRANSGLYCOSYLASE 4); hydrolase, acting on glycosyl bonds / hydrolase, hydrolyzing O-glycosyl compounds / xyloglucan:xyloglucosyl transferase | chr1:11575320-11577927 FORWARD
BnaA05g32450D	-1.68983	10.7	cell wall.modification	Symbols: ATEXPA13, EXP13, ATEXP13, ATHEXP ALPHA 1.22 | ATEXPA13 (ARABIDOPSIS THALIANA EXPANSIN A13) | chr3:742354-744047 REVERSE
BnaA06g07180D	-2.42988	10.7	cell wall.modification	xyloglucan:xyloglucosyl transferase, putative / xyloglucan endotransglycosylase, putative / endo-xyloglucan transferase, putative | chr1:3878550-3880361 REVERSE
BnaA06g33850D	-2.86237	10.7	cell wall.modification	Symbols: ATEXPA15, EXP15, ATEXP15, ATHEXP ALPHA 1.3 | ATEXPA15 (ARABIDOPSIS THALIANA EXPANSIN A15) | chr2:916854-918643 REVERSE
BnaA07g01850D	-2.93323	10.7	cell wall.modification	Symbols: EXLB3 | EXLB3 (EXPANSIN-LIKE B3 PRECURSOR) | chr2:8090658-8091656 REVERSE
BnaA07g28080D	-1.45594	10.7	cell wall.modification	Symbols: ATEXPA1, EXP1, AT-EXP1, ATEXP1, ATHEXP ALPHA 1.2 | ATEXPA1 (ARABIDOPSIS THALIANA EXPANSIN A1) | chr1:26141836-26143496 FORWARD
BnaA09g01390D	-2.16722	10.7	cell wall.modification	Symbols: XTH9 | XTH9 (XYLOGLUCAN ENDOTRANSGLUCOSYLASE/HYDROLASE 9); hydrolase, acting on glycosyl bonds / xyloglucan:xyloglucosyl transferase | chr4:1415949-1417327 FORWARD
BnaAnng17950D	-3.38103	10.7	cell wall.modification	Symbols: ATEXPA20, EXP20, ATEXP20, ATHEXP ALPHA 1.23 | ATEXPA20 (ARABIDOPSIS THALIANA EXPANSIN A20) | chr4:17922756-17923973 REVERSE
BnaC01g17710D	-2.5803	10.7	cell wall.modification	Symbols: XTR6, XTH23 | XTR6 (XYLOGLUCAN ENDOTRANSGLYCOSYLASE 6); hydrolase, acting on glycosyl bonds / hydrolase, hydrolyzing O-glycosyl compounds / xyloglucan:xyloglucosyl transferase | chr4:13128643-13129884 FORWARD
BnaC01g20780D	-1.99983	10.7	cell wall.modification	Symbols: ATEXPB3, EXPB3, ATHEXP BETA 1.6 | ATEXPB3 (ARABIDOPSIS THALIANA EXPANSIN B3) | chr4:14000038-14002069 REVERSE
BnaC02g47920D	-2.10919	10.7	cell wall.modification	Symbols: ATEXPA15, EXP15, ATEXP15, ATHEXP ALPHA 1.3 | ATEXPA15 (ARABIDOPSIS THALIANA EXPANSIN A15) | chr2:916854-918643 REVERSE
BnaC03g22750D	-6.29496	10.7	cell wall.modification	Symbols: ATEXPA8, EXP8, ATEXP8, ATHEXP ALPHA 1.11 | ATEXPA8 (ARABIDOPSIS THALIANA EXPANSIN A8) | chr2:16948863-16950557 REVERSE
BnaC03g55190D	-1.26586	10.7	cell wall.modification	Symbols: XTR8, ATXTR8 | XTR8 (XYLOGLUCAN ENDO-TRANSGLYCOSYLASE-RELATED 8); hydrolase, acting on glycosyl bonds / xyloglucan:xyloglucosyl transferase | chr3:16446975-16448764 REVERSE
BnaC03g73080D	-1.22898	10.7	cell wall.modification	Symbols: XTH9 | XTH9 (XYLOGLUCAN ENDOTRANSGLUCOSYLASE/HYDROLASE 9); hydrolase, acting on glycosyl bonds / xyloglucan:xyloglucosyl transferase | chr4:1415949-1417327 FORWARD
BnaC04g01470D	-3.08061	10.7	cell wall.modification	Symbols: ATEXPA8, EXP8, ATEXP8, ATHEXP ALPHA 1.11 | ATEXPA8 (ARABIDOPSIS THALIANA EXPANSIN A8) | chr2:16948863-16950557 REVERSE
BnaC04g05770D	-1.17143	10.7	cell wall.modification	Symbols: ATEXPA4, ATEXP4, ATHEXP ALPHA 1.6 | ATEXPA4 (ARABIDOPSIS THALIANA EXPANSIN A4) | chr2:16543832-16545584 REVERSE
BnaC04g40170D	-3.8844	10.7	cell wall.modification	Symbols: ATEXPA6, ATEXP6, ATHEXP ALPHA 1.8 | ATEXPA6 (ARABIDOPSIS THALIANA EXPANSIN A6) | chr2:12431341-12433595 REVERSE
BnaC07g46780D	-2.69523	10.7	cell wall.modification	xyloglucan:xyloglucosyl transferase, putative / xyloglucan endotransglycosylase, putative / endo-xyloglucan transferase, putative | chr4:17775474-17777397 REVERSE
BnaC07g50680D	-2.32757	10.7	cell wall.modification	Symbols: ATEXPB3, EXPB3, ATHEXP BETA 1.6 | ATEXPB3 (ARABIDOPSIS THALIANA EXPANSIN B3) | chr4:14000038-14002069 REVERSE
BnaC08g14380D	-4.89724	10.7	cell wall.modification	Symbols: XTH33, XET | XTH33; hydrolase, acting on glycosyl bonds / hydrolase, hydrolyzing O-glycosyl compounds / xyloglucan:xyloglucosyl transferase | chr1:3479153-3480988 REVERSE
BnaCnng06330D	-3.0614	10.7	cell wall.modification	Symbols: ATEXPA13, EXP13, ATEXP13, ATHEXP ALPHA 1.22 | ATEXPA13 (ARABIDOPSIS THALIANA EXPANSIN A13) | chr3:742354-744047 REVERSE
BnaCnng18010D	-3.37199	10.7	cell wall.modification	xyloglucan:xyloglucosyl transferase, putative / xyloglucan endotransglycosylase, putative / endo-xyloglucan transferase, putative | chr1:3878550-3880361 REVERSE
BnaCnng24730D	-1.92359	10.7	cell wall.modification	xyloglucan:xyloglucosyl transferase, putative / xyloglucan endotransglycosylase, putative / endo-xyloglucan transferase, putative | chr2:15472645-15474681 REVERSE
BnaCnng38050D	-1.30613	10.7	cell wall.modification	xyloglucan:xyloglucosyl transferase, putative / xyloglucan endotransglycosylase, putative / endo-xyloglucan transferase, putative | chr3:8550110-8551335 FORWARD
BnaCnng64440D	-1.94677	10.7	cell wall.modification	Symbols: ATEXPA4, ATEXP4, ATHEXP ALPHA 1.6 | ATEXPA4 (ARABIDOPSIS THALIANA EXPANSIN A4) | chr2:16543832-16545584 REVERSE
BnaCnng71550D	-3.37965	10.7	cell wall.modification	Symbols: ATEXPA1, EXP1, AT-EXP1, ATEXP1, ATHEXP ALPHA 1.2 | ATEXPA1 (ARABIDOPSIS THALIANA EXPANSIN A1) | chr1:26141836-26143496 FORWARD
BnaCnng71940D	-3.30144	10.7	cell wall.modification	Symbols: EXLB3 | EXLB3 (EXPANSIN-LIKE B3 PRECURSOR) | chr2:8090658-8091656 REVERSE
BnaA04g22910D	1.94046	10.7	cell wall.modification	Symbols: ATEXPA4, ATEXP4, ATHEXP ALPHA 1.6 | ATEXPA4 (ARABIDOPSIS THALIANA EXPANSIN A4) | chr2:16543832-16545584 REVERSE
BnaA06g24680D	2.232	10.7	cell wall.modification	xyloglucan:xyloglucosyl transferase, putative / xyloglucan endotransglycosylase, putative / endo-xyloglucan transferase, putative | chr5:26299032-26300478 FORWARD
BnaA06g34490D	1.27413	10.7	cell wall.modification	Symbols: EXGT-A3, XTH27, ATXTH27 | EXGT-A3; hydrolase, acting on glycosyl bonds / xyloglucan:xyloglucosyl transferase | chr2:385199-387344 FORWARD
BnaC07g21270D	1.73749	10.7	cell wall.modification	Symbols: EXGT-A3, XTH27, ATXTH27 | EXGT-A3; hydrolase, acting on glycosyl bonds / xyloglucan:xyloglucosyl transferase | chr2:385199-387344 FORWARD
BnaCnng13310D	2.20798	10.7	cell wall.modification	xyloglucan:xyloglucosyl transferase, putative / xyloglucan endotransglycosylase, putative / endo-xyloglucan transferase, putative | chr5:26299032-26300478 FORWARD
BnaA04g03540D	5.07058	10.7	cell wall.modification	Symbols: ATEXPA16, EXP16, ATEXP16, ATHEXP ALPHA 1.7 | ATEXPA16 (ARABIDOPSIS THALIANA EXPANSIN A16) | chr3:20574831-20576182 REVERSE
BnaCnng23400D	1.85919	10.7	cell wall.modification	Symbols: ATEXLA1, EXPL1, ATEXPL1, ATHEXP BETA 2.1 | ATEXLA1 (ARABIDOPSIS THALIANA EXPANSIN-LIKE A1) | chr3:16896166-16897308 FORWARD
BnaAnng17970D	2.27151	10.7	cell wall.modification	Symbols: ATEXLA1, EXPL1, ATEXPL1, ATHEXP BETA 2.1 | ATEXLA1 (ARABIDOPSIS THALIANA EXPANSIN-LIKE A1) | chr3:16896166-16897308 FORWARD
BnaCnng43640D	4.61798	10.7	cell wall.modification	Symbols: ATEXLA1, EXPL1, ATEXPL1, ATHEXP BETA 2.1 | ATEXLA1 (ARABIDOPSIS THALIANA EXPANSIN-LIKE A1) | chr3:16896166-16897308 FORWARD
BnaA09g35150D	2.81635	10.7	cell wall.modification	Symbols: ATEXPA16, EXP16, ATEXP16, ATHEXP ALPHA 1.7 | ATEXPA16 (ARABIDOPSIS THALIANA EXPANSIN A16) | chr3:20574831-20576182 REVERSE
BnaC08g26400D	3.66054	10.7	cell wall.modification	Symbols: ATEXPA16, EXP16, ATEXP16, ATHEXP ALPHA 1.7 | ATEXPA16 (ARABIDOPSIS THALIANA EXPANSIN A16) | chr3:20574831-20576182 REVERSE
BnaAnng31590D	8.835	10.7	cell wall.modification	Symbols: XTR9 | XTR9 (XYLOGLUCAN ENDOTRANSGLYCOSYLASE 9); hydrolase, acting on glycosyl bonds / hydrolase, hydrolyzing O-glycosyl compounds / xyloglucan:xyloglucosyl transferase | chr4:13130297-13131788 FORWARD
BnaA03g50070D	3.78683	10.7	cell wall.modification	Symbols: ATXTH20, XTH20 | XTH20 (XYLOGLUCAN ENDOTRANSGLUCOSYLASE/HYDROLASE 20); hydrolase, acting on glycosyl bonds / hydrolase, hydrolyzing O-glycosyl compounds / xyloglucan:xyloglucosyl transferase | chr5:19482106-19483452 FORWARD
BnaA06g40800D	3.44111	10.7	cell wall.modification	Symbols: ATEXLA1, EXPL1, ATEXPL1, ATHEXP BETA 2.1 | ATEXLA1 (ARABIDOPSIS THALIANA EXPANSIN-LIKE A1) | chr3:16896166-16897308 FORWARD
BnaCnng78620D	2.80308	10.7	cell wall.modification	Symbols: ATEXLA1, EXPL1, ATEXPL1, ATHEXP BETA 2.1 | ATEXLA1 (ARABIDOPSIS THALIANA EXPANSIN-LIKE A1) | chr3:16896166-16897308 FORWARD
BnaC04g25430D	6.09688	10.7	cell wall.modification	Symbols: ATEXPA16, EXP16, ATEXP16, ATHEXP ALPHA 1.7 | ATEXPA16 (ARABIDOPSIS THALIANA EXPANSIN A16) | chr3:20574831-20576182 REVERSE
BnaC07g42530D	1.755	10.7	cell wall.modification	Symbols: ATXTH20, XTH20 | XTH20 (XYLOGLUCAN ENDOTRANSGLUCOSYLASE/HYDROLASE 20); hydrolase, acting on glycosyl bonds / hydrolase, hydrolyzing O-glycosyl compounds / xyloglucan:xyloglucosyl transferase | chr5:19482106-19483452 FORWARD
BnaA01g20390D	2.00972	10.7	cell wall.modification	xyloglucan:xyloglucosyl transferase, putative / xyloglucan endotransglycosylase, putative / endo-xyloglucan transferase, putative | chr3:18007181-18008488 FORWARD
BnaA01g34460D	-2.78534	10.7	cell wall.modification	Symbols: ATEXPA13, EXP13, ATEXP13, ATHEXP ALPHA 1.22 | ATEXPA13 (ARABIDOPSIS THALIANA EXPANSIN A13) | chr3:742354-744047 REVERSE
BnaA02g26000D	1.05316	10.7	cell wall.modification	Symbols: EXGT-A3, XTH27, ATXTH27 | EXGT-A3; hydrolase, acting on glycosyl bonds / xyloglucan:xyloglucosyl transferase | chr2:385199-387344 FORWARD
BnaA02g35250D	-3.3837	10.7	cell wall.modification	Symbols: TCH4, XTH22 | TCH4 (Touch 4); hydrolase, acting on glycosyl bonds / xyloglucan:xyloglucosyl transferase | chr5:23307130-23308282 REVERSE
BnaA03g18690D	1.44803	10.7	cell wall.modification	Symbols: ATEXPA4, ATEXP4, ATHEXP ALPHA 1.6 | ATEXPA4 (ARABIDOPSIS THALIANA EXPANSIN A4) | chr2:16543832-16545584 REVERSE
BnaA03g42880D	-1.85171	10.7	cell wall.modification	Symbols: ATEXLB1, EXPR, AT-EXPR, ATEXPR1, ATHEXP BETA 3.1 | ATEXLB1 (ARABIDOPSIS THALIANA EXPANSIN-LIKE B1) | chr4:9581586-9583290 REVERSE
BnaA03g58070D	-1.84298	10.7	cell wall.modification	Symbols: ATEXLB1, EXPR, AT-EXPR, ATEXPR1, ATHEXP BETA 3.1 | ATEXLB1 (ARABIDOPSIS THALIANA EXPANSIN-LIKE B1) | chr4:9581586-9583290 REVERSE
BnaA04g23400D	-1.9852	10.7	cell wall.modification	Symbols: ATEXPA8, EXP8, ATEXP8, ATHEXP ALPHA 1.11 | ATEXPA8 (ARABIDOPSIS THALIANA EXPANSIN A8) | chr2:16948863-16950557 REVERSE
BnaA06g31110D	-1.20517	10.7	cell wall.modification	Symbols: ATEXPA5, ATEXP5, ATHEXP ALPHA 1.4, EXP5, EXPA5 | EXPA5 (EXPANSIN A5) | chr3:11011308-11013358 REVERSE
BnaA09g02480D	1.30132	10.7	cell wall.modification	Symbols: ATEXPA5, ATEXP5, ATHEXP ALPHA 1.4, EXP5, EXPA5 | EXPA5 (EXPANSIN A5) | chr3:11011308-11013358 REVERSE
BnaA10g11500D	-3.00834	10.7	cell wall.modification	Symbols: TCH4, XTH22 | TCH4 (Touch 4); hydrolase, acting on glycosyl bonds / xyloglucan:xyloglucosyl transferase | chr5:23307130-23308282 REVERSE
BnaC01g08110D	-3.68695	10.7	cell wall.modification	Symbols: ATXTH20, XTH20 | XTH20 (XYLOGLUCAN ENDOTRANSGLUCOSYLASE/HYDROLASE 20); hydrolase, acting on glycosyl bonds / hydrolase, hydrolyzing O-glycosyl compounds / xyloglucan:xyloglucosyl transferase | chr5:19482106-19483452 FORWARD
BnaC01g08120D	-5.66025	10.7	cell wall.modification	Symbols: ATXTH18, XTH18 | XTH18 (XYLOGLUCAN ENDOTRANSGLUCOSYLASE/HYDROLASE 18); hydrolase, acting on glycosyl bonds / hydrolase, hydrolyzing O-glycosyl compounds / xyloglucan:xyloglucosyl transferase | chr4:14825808-14827047 REVERSE
BnaC01g25620D	9.29155	10.7	cell wall.modification	xyloglucan:xyloglucosyl transferase, putative / xyloglucan endotransglycosylase, putative / endo-xyloglucan transferase, putative | chr3:18007181-18008488 FORWARD
BnaC02g11470D	-5.4107	10.7	cell wall.modification	Symbols: TCH4, XTH22 | TCH4 (Touch 4); hydrolase, acting on glycosyl bonds / xyloglucan:xyloglucosyl transferase | chr5:23307130-23308282 REVERSE
BnaC02g11480D	-3.23582	10.7	cell wall.modification	Symbols: TCH4, XTH22 | TCH4 (Touch 4); hydrolase, acting on glycosyl bonds / xyloglucan:xyloglucosyl transferase | chr5:23307130-23308282 REVERSE
BnaC03g00640D	-2.974	10.7	cell wall.modification	Symbols: ATEXPA9, EXP9, ATEXP9, ATHEXP ALPHA 1.10 | ATEXPA9 (ARABIDOPSIS THALIANA EXPANSIN A9) | chr5:463158-465246 FORWARD
BnaC04g07740D	-2.60273	10.7	cell wall.modification	Symbols: ATEXPA3, ATEXP3, ATHEXP ALPHA 1.9, EXP3 | EXP3 | chr2:15787705-15789853 REVERSE
BnaC04g47280D	-1.06857	10.7	cell wall.modification	Symbols: ATEXPA8, EXP8, ATEXP8, ATHEXP ALPHA 1.11 | ATEXPA8 (ARABIDOPSIS THALIANA EXPANSIN A8) | chr2:16948863-16950557 REVERSE
BnaC07g00140D	-1.14637	10.7	cell wall.modification	Symbols: ATEXPB1, EXPB1, ATHEXP BETA 1.5 | ATEXPB1 (ARABIDOPSIS THALIANA EXPANSIN B1) | chr2:8941119-8942689 FORWARD
BnaC07g25500D	-2.06904	10.7	cell wall.modification	Symbols: ATEXPA5, ATEXP5, ATHEXP ALPHA 1.4, EXP5, EXPA5 | EXPA5 (EXPANSIN A5) | chr3:11011308-11013358 REVERSE
BnaC08g14370D	-7.78136	10.7	cell wall.modification	Symbols: XTH33, XET | XTH33; hydrolase, acting on glycosyl bonds / hydrolase, hydrolyzing O-glycosyl compounds / xyloglucan:xyloglucosyl transferase | chr1:3479153-3480988 REVERSE
BnaC09g00910D	-3.76005	10.7	cell wall.modification	Symbols: XTH9 | XTH9 (XYLOGLUCAN ENDOTRANSGLUCOSYLASE/HYDROLASE 9); hydrolase, acting on glycosyl bonds / xyloglucan:xyloglucosyl transferase | chr4:1415949-1417327 FORWARD
BnaC09g32750D	-1.70722	10.7	cell wall.modification	Symbols: TCH4, XTH22 | TCH4 (Touch 4); hydrolase, acting on glycosyl bonds / xyloglucan:xyloglucosyl transferase | chr5:23307130-23308282 REVERSE
BnaCnng18430D	2.03887	10.7	cell wall.modification	Symbols: ATEXPA13, EXP13, ATEXP13, ATHEXP ALPHA 1.22 | ATEXPA13 (ARABIDOPSIS THALIANA EXPANSIN A13) | chr3:742354-744047 REVERSE
BnaCnng49800D	3.02088	10.7	cell wall.modification	Symbols: ATEXPA5, ATEXP5, ATHEXP ALPHA 1.4, EXP5, EXPA5 | EXPA5 (EXPANSIN A5) | chr3:11011308-11013358 REVERSE
BnaA02g22590D	-2.80457	11	lipid metabolism	tetraacyldisaccharide 4'-kinase family protein | chr3:7151424-7153392 REVERSE
BnaC02g30980D	-3.58095	11	lipid metabolism	tetraacyldisaccharide 4'-kinase family protein | chr3:7151424-7153392 REVERSE
BnaA05g06580D	-2.3101	11.3	lipid metabolism.Phospholipid synthesis	Symbols: ATGPAT6, GPAT6 | GPAT6 (GLYCEROL-3-PHOSPHATE ACYLTRANSFERASE 6); 1-acylglycerol-3-phosphate O-acyltransferase/ acyltransferase | chr2:15952607-15955494 REVERSE
BnaAnng23770D	-1.79343	11.3	lipid metabolism.Phospholipid synthesis	phosphatidyl serine synthase family protein | chr1:5199018-5202175 FORWARD
BnaCnng43470D	-1.8316	11.3	lipid metabolism.Phospholipid synthesis	Symbols: ATGPAT6, GPAT6 | GPAT6 (GLYCEROL-3-PHOSPHATE ACYLTRANSFERASE 6); 1-acylglycerol-3-phosphate O-acyltransferase/ acyltransferase | chr2:15952607-15955494 REVERSE
BnaA10g01090D	1.96148	11.3	lipid metabolism.Phospholipid synthesis	Symbols: ATGPAT2, GPAT2 | GPAT2 (GLYCEROL-3-PHOSPHATE ACYLTRANSFERASE 2); acyltransferase | chr1:480852-483292 FORWARD
BnaA10g00370D	1.86315	11.3	lipid metabolism.Phospholipid synthesis	Symbols: ATGPAT4, GPAT4 | GPAT4 (GLYCEROL-3-PHOSPHATE ACYLTRANSFERASE 4); 1-acylglycerol-3-phosphate O-acyltransferase/ acyltransferase | chr1:221691-224340 REVERSE
BnaC05g00450D	1.46359	11.3	lipid metabolism.Phospholipid synthesis	Symbols: ATGPAT4, GPAT4 | GPAT4 (GLYCEROL-3-PHOSPHATE ACYLTRANSFERASE 4); 1-acylglycerol-3-phosphate O-acyltransferase/ acyltransferase | chr1:221691-224340 REVERSE
BnaAnng14270D	2.15703	11.3	lipid metabolism.Phospholipid synthesis	Symbols: ATGPAT6, GPAT6 | GPAT6 (GLYCEROL-3-PHOSPHATE ACYLTRANSFERASE 6); 1-acylglycerol-3-phosphate O-acyltransferase/ acyltransferase | chr2:15952607-15955494 REVERSE
BnaC03g34280D	1.59805	11.3	lipid metabolism.Phospholipid synthesis	phospholipid/glycerol acyltransferase family protein | chr3:1595394-1598271 FORWARD
BnaC09g01080D	9.89684	11.3	lipid metabolism.Phospholipid synthesis	Symbols: ATGPAT6, GPAT6 | GPAT6 (GLYCEROL-3-PHOSPHATE ACYLTRANSFERASE 6); 1-acylglycerol-3-phosphate O-acyltransferase/ acyltransferase | chr2:15952607-15955494 REVERSE
BnaC05g04490D	2.00269	11.3	lipid metabolism.Phospholipid synthesis	Symbols: ATGPAT1, GPAT1 | GPAT1 (GLYCEROL-3-PHOSPHATE ACYLTRANSFERASE 1); 1-acylglycerol-3-phosphate O-acyltransferase/ acyltransferase | chr1:1993978-1996112 REVERSE
BnaC05g01190D	1.08709	11.3	lipid metabolism.Phospholipid synthesis	Symbols: ATGPAT2, GPAT2 | GPAT2 (GLYCEROL-3-PHOSPHATE ACYLTRANSFERASE 2); acyltransferase | chr1:480852-483292 FORWARD
BnaC06g23520D	1.02446	11.3	lipid metabolism.Phospholipid synthesis	methyltransferase/ phosphoethanolamine N-methyltransferase | chr1:27669152-27673572 FORWARD
BnaA03g40390D	4.60733	11.4	lipid metabolism.TAG synthesis	INVOLVED IN: lipid storage; LOCATED IN: monolayer-surrounded lipid storage body, endomembrane system, integral to membrane, membrane; CONTAINS InterPro DOMAIN/s: Oleosin (InterPro:IPR000136); Has 6250 Blast hits to 2851 proteins in 405 species: Archae - 6; Bacteria - 1198; Metazoa - 1427; Fungi - 369; Plants - 513; Viruses - 103; Other Eukaryotes - 2634 (source: NCBI BLink). | chr5:24770099-24771…
BnaA02g35480D	-2.30841	11.4	lipid metabolism.TAG synthesis	glycine-rich protein / oleosin | chr5:22717115-22717751 FORWARD
BnaAnng30990D	1.1087	11.4	lipid metabolism.TAG synthesis	Symbols: TAG1, AS11, ABX45, DGAT1, RDS1, ATDGAT | TAG1 (TRIACYLGLYCEROL BIOSYNTHESIS DEFECT 1); diacylglycerol O-acyltransferase | chr2:8426206-8429736 FORWARD
BnaCnng52810D	1.11734	11.4	lipid metabolism.TAG synthesis	Symbols: TAG1, AS11, ABX45, DGAT1, RDS1, ATDGAT | TAG1 (TRIACYLGLYCEROL BIOSYNTHESIS DEFECT 1); diacylglycerol O-acyltransferase | chr2:8426206-8429736 FORWARD
BnaA01g19350D	-2.19373	11.6	lipid metabolism.lipid transfer proteins etc	Symbols: LTP5 | LTP5 (Lipid transfer protein 5); lipid transporter | chr3:19138394-19139252 REVERSE
BnaA03g09540D	-2.22282	11.6	lipid metabolism.lipid transfer proteins etc	Symbols: LTP3 | LTP3 (LIPID TRANSFER PROTEIN 3); lipid binding | chr5:23928971-23929745 FORWARD
BnaA03g31060D	-3.31732	11.6	lipid metabolism.lipid transfer proteins etc	Symbols: LTP6 | LTP6; lipid binding | chr3:2664139-2664828 REVERSE
BnaA04g19520D	-1.72909	11.6	lipid metabolism.lipid transfer proteins etc	Symbols: GLTP1 | GLTP1 (glycolipid transfer protein 1); glycolipid binding / glycolipid transporter | chr2:14176363-14178651 REVERSE
BnaA04g22080D	-1.45001	11.6	lipid metabolism.lipid transfer proteins etc	Symbols: LP1, LTP1, ATLTP1 | LP1; calmodulin binding | chr2:16130350-16131174 FORWARD
BnaA09g18770D	-1.77088	11.6	lipid metabolism.lipid transfer proteins etc	Symbols: CP5 | CP5 | chr1:24046553-24048622 REVERSE
BnaC01g23300D	-2.89676	11.6	lipid metabolism.lipid transfer proteins etc	Symbols: LTP5 | LTP5 (Lipid transfer protein 5); lipid transporter | chr3:19138394-19139252 REVERSE
BnaC03g36390D	-2.60434	11.6	lipid metabolism.lipid transfer proteins etc	Symbols: LTP6 | LTP6; lipid binding | chr3:2664139-2664828 REVERSE
BnaC04g43910D	-1.35323	11.6	lipid metabolism.lipid transfer proteins etc	Symbols: GLTP1 | GLTP1 (glycolipid transfer protein 1); glycolipid binding / glycolipid transporter | chr2:14176363-14178651 REVERSE
BnaC04g45800D	-1.58442	11.6	lipid metabolism.lipid transfer proteins etc	Symbols: LP1, LTP1, ATLTP1 | LP1; calmodulin binding | chr2:16130350-16131174 FORWARD
BnaC09g20830D	-2.61523	11.6	lipid metabolism.lipid transfer proteins etc	Symbols: CP5 | CP5 | chr1:24046553-24048622 REVERSE
BnaCnng36210D	1.59951	11.6	lipid metabolism.lipid transfer proteins etc	Symbols: LTPG1 | LTPG1 (GLYCOSYLPHOSPHATIDYLINOSITOL-ANCHORED LIPID PROTEIN TRANSFER 1) | chr1:9740704-9742159 FORWARD
BnaC03g58190D	2.6849	11.6	lipid metabolism.lipid transfer proteins etc	Symbols: LTPG1 | LTPG1 (GLYCOSYLPHOSPHATIDYLINOSITOL-ANCHORED LIPID PROTEIN TRANSFER 1) | chr1:9740704-9742159 FORWARD
BnaA08g18690D	1.83709	11.6	lipid metabolism.lipid transfer proteins etc	Symbols: LTPG1 | LTPG1 (GLYCOSYLPHOSPHATIDYLINOSITOL-ANCHORED LIPID PROTEIN TRANSFER 1) | chr1:9740704-9742159 FORWARD
BnaC07g11810D	3.11536	11.6	lipid metabolism.lipid transfer proteins etc	Symbols: LTPG1 | LTPG1 (GLYCOSYLPHOSPHATIDYLINOSITOL-ANCHORED LIPID PROTEIN TRANSFER 1) | chr1:9740704-9742159 FORWARD
BnaA07g08700D	6.68568	11.6	lipid metabolism.lipid transfer proteins etc	Symbols: LTPG1 | LTPG1 (GLYCOSYLPHOSPHATIDYLINOSITOL-ANCHORED LIPID PROTEIN TRANSFER 1) | chr1:9740704-9742159 FORWARD
BnaA07g08720D	5.4891	11.6	lipid metabolism.lipid transfer proteins etc	Symbols: LTPG1 | LTPG1 (GLYCOSYLPHOSPHATIDYLINOSITOL-ANCHORED LIPID PROTEIN TRANSFER 1) | chr1:9740704-9742159 FORWARD
BnaA02g07110D	2.53413	11.6	lipid metabolism.lipid transfer proteins etc	Symbols: LTP4 | LTP4 (LIPID TRANSFER PROTEIN 4); lipid binding | chr5:23925085-23925852 REVERSE
BnaA03g13140D	2.34485	11.6	lipid metabolism.lipid transfer proteins etc	Symbols: LTP3 | LTP3 (LIPID TRANSFER PROTEIN 3); lipid binding | chr5:23928971-23929745 FORWARD
BnaA09g27660D	1.52884	11.6	lipid metabolism.lipid transfer proteins etc	Symbols: LTPG1 | LTPG1 (GLYCOSYLPHOSPHATIDYLINOSITOL-ANCHORED LIPID PROTEIN TRANSFER 1) | chr1:9740704-9742159 FORWARD
BnaAnng19290D	1.27335	11.6	lipid metabolism.lipid transfer proteins etc	lipid transfer protein-related | chr2:18307309-18308349 REVERSE
BnaAnng34100D	-2.20945	11.6	lipid metabolism.lipid transfer proteins etc	Symbols: GLTP1 | GLTP1 (glycolipid transfer protein 1); glycolipid binding / glycolipid transporter | chr2:14176363-14178651 REVERSE
BnaC02g10060D	1.0379	11.6	lipid metabolism.lipid transfer proteins etc	Symbols: LTP4 | LTP4 (LIPID TRANSFER PROTEIN 4); lipid binding | chr5:23925085-23925852 REVERSE
BnaC03g12050D	-2.66297	11.6	lipid metabolism.lipid transfer proteins etc	Symbols: LTP3 | LTP3 (LIPID TRANSFER PROTEIN 3); lipid binding | chr5:23928971-23929745 FORWARD
BnaCnng42980D	3.0235	11.6	lipid metabolism.lipid transfer proteins etc	Symbols: LTP4 | LTP4 (LIPID TRANSFER PROTEIN 4); lipid binding | chr5:23925085-23925852 REVERSE
BnaCnng62630D	-1.20533	11.6	lipid metabolism.lipid transfer proteins etc	glycolipid transfer protein-related | chr3:7464020-7465785 REVERSE
BnaCnng01540D	-1.87324	11.7	lipid metabolism.unassigned	Symbols: ARV2 | ARV2 | chr4:642733-644336 FORWARD
BnaA02g27270D	-4.3997	11.8	lipid metabolism.'exotics'(steroids, squalene etc)	sulfotransferase family protein | chr2:1147807-1149061 REVERSE
BnaA06g37980D	-1.85488	11.8	lipid metabolism.'exotics'(steroids, squalene etc)	Symbols: ERG28 | ERG28 (Arabidopsis homolog of yeast ergosterol28) | chr1:3273825-3275837 FORWARD
BnaA07g32390D	-1.11049	11.8	lipid metabolism.'exotics'(steroids, squalene etc)	Symbols: ECH2, ATECH2 | maoC-like dehydratase domain-containing protein | chr1:28574740-28577700 REVERSE
BnaA10g08330D	-1.07673	11.8	lipid metabolism.'exotics'(steroids, squalene etc)	quinone reductase family protein | chr4:13661331-13663294 REVERSE
BnaAnng18230D	-1.3093	11.8	lipid metabolism.'exotics'(steroids, squalene etc)	quinone reductase family protein | chr4:17324571-17326457 FORWARD
BnaC03g02410D	-2.08794	11.8	lipid metabolism.'exotics'(steroids, squalene etc)	sulfotransferase family protein | chr5:17546173-17547434 FORWARD
BnaC03g56620D	-8.07682	11.8	lipid metabolism.'exotics'(steroids, squalene etc)	sulfotransferase family protein | chr5:17546173-17547434 FORWARD
BnaC05g07790D	-2.12153	11.8	lipid metabolism.'exotics'(steroids, squalene etc)	Symbols: ERG28 | ERG28 (Arabidopsis homolog of yeast ergosterol28) | chr1:3273825-3275837 FORWARD
BnaC06g36850D	-1.34135	11.8	lipid metabolism.'exotics'(steroids, squalene etc)	Symbols: ECH2, ATECH2 | maoC-like dehydratase domain-containing protein | chr1:28574740-28577700 REVERSE
BnaC07g46240D	-1.36944	11.8	lipid metabolism.'exotics'(steroids, squalene etc)	quinone reductase family protein | chr4:17324571-17326457 FORWARD
BnaC09g16260D	-1.71082	11.8	lipid metabolism.'exotics'(steroids, squalene etc)	sulfotransferase family protein | chr2:1147807-1149061 REVERSE
BnaC09g17220D	-1.22477	11.8	lipid metabolism.'exotics'(steroids, squalene etc)	Symbols: ATSCP2, SCP2 | SCP2 (STEROL CARRIER PROTEIN 2); oxidoreductase/ sterol carrier | chr5:17194197-17196032 REVERSE
BnaCnng38420D	-2.68148	11.8	lipid metabolism.'exotics'(steroids, squalene etc)	quinone reductase family protein | chr4:13661331-13663294 REVERSE
BnaAnng01940D	4.86519	11.8	lipid metabolism.'exotics'(steroids, squalene etc)	Symbols: ATST2A, ST2A | ST2A (SULFOTRANSFERASE 2A); hydroxyjasmonate sulfotransferase/ sulfotransferase | chr5:2174678-2176106 REVERSE
BnaA09g15810D	3.06726	11.8	lipid metabolism.'exotics'(steroids, squalene etc)	sulfotransferase family protein | chr2:1147807-1149061 REVERSE
BnaC09g48180D	4.12886	11.8	lipid metabolism.'exotics'(steroids, squalene etc)	Symbols: ATST2A, ST2A | ST2A (SULFOTRANSFERASE 2A); hydroxyjasmonate sulfotransferase/ sulfotransferase | chr5:2174678-2176106 REVERSE
BnaC02g01760D	5.5343	11.8	lipid metabolism.'exotics'(steroids, squalene etc)	Symbols: ATST2A, ST2A | ST2A (SULFOTRANSFERASE 2A); hydroxyjasmonate sulfotransferase/ sulfotransferase | chr5:2174678-2176106 REVERSE
BnaA03g55570D	6.89633	11.8	lipid metabolism.'exotics'(steroids, squalene etc)	Symbols: ATST2A, ST2A | ST2A (SULFOTRANSFERASE 2A); hydroxyjasmonate sulfotransferase/ sulfotransferase | chr5:2174678-2176106 REVERSE
BnaAnng33290D	4.38875	11.8	lipid metabolism.'exotics'(steroids, squalene etc)	Symbols: ATST2A, ST2A | ST2A (SULFOTRANSFERASE 2A); hydroxyjasmonate sulfotransferase/ sulfotransferase | chr5:2174678-2176106 REVERSE
BnaA01g01080D	-1.16752	11.8	lipid metabolism.'exotics'(steroids, squalene etc)	quinone reductase family protein | chr4:17324571-17326457 FORWARD
BnaA07g24740D	-3.80735	11.8	lipid metabolism.'exotics'(steroids, squalene etc)	sulfotransferase family protein | chr5:17546173-17547434 FORWARD
BnaA09g15760D	-1.19838	11.8	lipid metabolism.'exotics'(steroids, squalene etc)	Symbols: ATSCP2, SCP2 | SCP2 (STEROL CARRIER PROTEIN 2); oxidoreductase/ sterol carrier | chr5:17194197-17196032 REVERSE
BnaC02g35140D	-1.88821	11.8	lipid metabolism.'exotics'(steroids, squalene etc)	sulfotransferase family protein | chr2:1147807-1149061 REVERSE
BnaC03g32520D	-1.98185	11.8	lipid metabolism.'exotics'(steroids, squalene etc)	Symbols: ATSCP2, SCP2 | SCP2 (STEROL CARRIER PROTEIN 2); oxidoreductase/ sterol carrier | chr5:17194197-17196032 REVERSE
BnaC08g13940D	-1.25342	11.8	lipid metabolism.'exotics'(steroids, squalene etc)	Symbols: ERG28 | ERG28 (Arabidopsis homolog of yeast ergosterol28) | chr1:3273825-3275837 FORWARD
BnaCnng16580D	-1.29509	11.8	lipid metabolism.'exotics'(steroids, squalene etc)	quinone reductase family protein | chr4:13661331-13663294 REVERSE
BnaC03g43300D	-1.74226	11.9	lipid metabolism.lipid degradation	alcohol oxidase-related | chr3:8382805-8386148 FORWARD
BnaA07g06540D	3.08799	11.9	lipid metabolism.lipid degradation	alcohol oxidase-related | chr3:8382805-8386148 FORWARD
BnaA07g06550D	3.34783	11.9	lipid metabolism.lipid degradation	alcohol oxidase-related | chr3:8382805-8386148 FORWARD
BnaC07g08090D	2.31892	11.9	lipid metabolism.lipid degradation	alcohol oxidase-related | chr3:8382805-8386148 FORWARD
BnaA06g02770D	-4.04803	12.4	N-metabolism.misc	nitroreductase family protein | chr1:352637-354969 REVERSE
BnaA07g10840D	-1.42857	12.4	N-metabolism.misc	Symbols: UREF | UREF (urease accessory protein F); nickel ion binding | chr1:7666460-7667758 FORWARD
BnaC09g07390D	-2.078	12.4	N-metabolism.misc	nitrogen regulation family protein | chr5:26820121-26821964 REVERSE
BnaC08g21260D	-1.31125	12.4	N-metabolism.misc	FAD binding / catalytic/ tRNA dihydrouridine synthase | chr3:18400306-18402869 REVERSE
BnaA06g27610D	-3.55288	13	amino acid metabolism	ACT domain-containing protein | chr5:8787403-8789530 REVERSE
BnaC02g02600D	-2.46151	13	amino acid metabolism	ACT domain-containing protein | chr5:1368542-1371480 REVERSE
BnaC07g29440D	-4.42626	13	amino acid metabolism	ACT domain-containing protein | chr5:8787403-8789530 REVERSE
BnaA06g24830D	2.71304	13	amino acid metabolism	Symbols: ACR1 | ACR1 (ACT Domain Repeat 1); amino acid binding | chr5:26354909-26357866 FORWARD
BnaC03g01710D	-1.55227	13	amino acid metabolism	ACT domain-containing protein | chr5:1368542-1371480 REVERSE
BnaA02g35780D	-2.31103	13.99	amino acid metabolism.misc	Symbols: ACR4 | ACR4 (ACT REPEAT 4); amino acid binding | chr1:25957819-25960307 FORWARD
BnaA07g21080D	-1.91571	13.99	amino acid metabolism.misc	Symbols: ACR3 | ACR3; amino acid binding | chr1:28932162-28935539 FORWARD
BnaC02g18910D	-1.13393	13.99	amino acid metabolism.misc	Symbols: ACR4 | ACR4 (ACT REPEAT 4); amino acid binding | chr1:25957819-25960307 FORWARD
BnaC06g21200D	-2.32217	13.99	amino acid metabolism.misc	Symbols: ACR3 | ACR3; amino acid binding | chr1:28932162-28935539 FORWARD
BnaA07g27660D	1.2267	13.99	amino acid metabolism.misc	Symbols: ACR4 | ACR4 (ACT REPEAT 4); amino acid binding | chr1:25957819-25960307 FORWARD
BnaC05g09410D	1.7994	13.99	amino acid metabolism.misc	Symbols: ACR8 | ACR8; amino acid binding | chr1:4226362-4229138 REVERSE
BnaA06g08160D	1.45564	13.99	amino acid metabolism.misc	Symbols: ACR8 | ACR8; amino acid binding | chr1:4226362-4229138 REVERSE
BnaA08g24740D	1.44567	13.99	amino acid metabolism.misc	Symbols: ACR8 | ACR8; amino acid binding | chr1:4226362-4229138 REVERSE
BnaC07g22520D	1.73284	13.99	amino acid metabolism.misc	Symbols: ACR5 | ACR5; amino acid binding | chr2:1137635-1140186 REVERSE
BnaA01g19120D	-3.64672	14.1	S-assimilation.ATPS	Symbols: APS3 | APS3; sulfate adenylyltransferase (ATP) | chr4:8413288-8415391 REVERSE
BnaA06g36560D	-4.45958	14.1	S-assimilation.ATPS	Symbols: APS4 | APS4; sulfate adenylyltransferase (ATP) | chr5:17589394-17591535 REVERSE
BnaC01g22950D	-1.96044	14.1	S-assimilation.ATPS	Symbols: APS3 | APS3; sulfate adenylyltransferase (ATP) | chr4:8413288-8415391 REVERSE
BnaC07g17320D	-2.4179	14.1	S-assimilation.ATPS	Symbols: APS4 | APS4; sulfate adenylyltransferase (ATP) | chr5:17589394-17591535 REVERSE
BnaA03g36860D	1.28847	14.1	S-assimilation.ATPS	Symbols: APS1 | APS1 (ATP SULFURYLASE 1); sulfate adenylyltransferase (ATP) | chr3:8112723-8114992 FORWARD
BnaCnng62800D	2.16322	14.1	S-assimilation.ATPS	Symbols: APS1 | APS1 (ATP SULFURYLASE 1); sulfate adenylyltransferase (ATP) | chr3:8112723-8114992 FORWARD
BnaA01g34620D	-1.50759	14.15	S-assimilation.AKN	Symbols: AKN2 | AKN2 (APS-kinase 2); ATP binding / adenylylsulfate kinase/ kinase/ transferase, transferring phosphorus-containing groups | chr4:18519717-18521568 FORWARD
BnaA03g54400D	-1.32334	14.15	S-assimilation.AKN	Symbols: AKN2 | AKN2 (APS-kinase 2); ATP binding / adenylylsulfate kinase/ kinase/ transferase, transferring phosphorus-containing groups | chr4:18519717-18521568 FORWARD
BnaA06g25000D	-1.61741	14.15	S-assimilation.AKN	adenylylsulfate kinase, putative | chr5:26939159-26941010 FORWARD
BnaC01g00790D	-2.53689	14.15	S-assimilation.AKN	Symbols: AKN2 | AKN2 (APS-kinase 2); ATP binding / adenylylsulfate kinase/ kinase/ transferase, transferring phosphorus-containing groups | chr4:18519717-18521568 FORWARD
BnaC07g51290D	-2.34265	14.15	S-assimilation.AKN	Symbols: AKN2 | AKN2 (APS-kinase 2); ATP binding / adenylylsulfate kinase/ kinase/ transferase, transferring phosphorus-containing groups | chr4:18519717-18521568 FORWARD
BnaA09g20370D	-1.23549	14.2	S-assimilation.APR	Symbols: APR1, APR, PRH19, ATAPR1 | APR1 (APS REDUCTASE 1); adenylyl-sulfate reductase | chr4:2325003-2327013 FORWARD
BnaA01g11840D	1.48934	14.2	S-assimilation.APR	Symbols: APR3, PRH-26, PRH26, ATAPR3 | APR3 (APS REDUCTASE 3); adenylyl-sulfate reductase | chr4:11657008-11659105 REVERSE
BnaC01g13420D	2.00127	14.2	S-assimilation.APR	Symbols: APR3, PRH-26, PRH26, ATAPR3 | APR3 (APS REDUCTASE 3); adenylyl-sulfate reductase | chr4:11657008-11659105 REVERSE
BnaC04g19270D	2.00648	14.2	S-assimilation.APR	Symbols: APR2, APSR, PRH43, PRH, ATAPR2 | APR2 (5'ADENYLYLPHOSPHOSULFATE REDUCTASE 2); adenylyl-sulfate reductase/ phosphoadenylyl-sulfate reductase (thioredoxin) | chr1:22975530-22977602 REVERSE
BnaC07g37060D	1.12427	14.2	S-assimilation.APR	Symbols: APR3, PRH-26, PRH26, ATAPR3 | APR3 (APS REDUCTASE 3); adenylyl-sulfate reductase | chr4:11657008-11659105 REVERSE
BnaA03g31290D	-1.63558	14.3	S-assimilation.sulfite redox	Symbols: SIR | SIR; sulfite reductase (ferredoxin)/ sulfite reductase | chr5:1319356-1322526 FORWARD
BnaA10g25620D	-1.70399	14.3	S-assimilation.sulfite redox	Symbols: SIR | SIR; sulfite reductase (ferredoxin)/ sulfite reductase | chr5:1319356-1322526 FORWARD
BnaAnng23390D	-3.47061	14.3	S-assimilation.sulfite redox	Symbols: SIR | SIR; sulfite reductase (ferredoxin)/ sulfite reductase | chr5:1319356-1322526 FORWARD
BnaC03g36650D	-1.02148	14.3	S-assimilation.sulfite redox	Symbols: SIR | SIR; sulfite reductase (ferredoxin)/ sulfite reductase | chr5:1319356-1322526 FORWARD
BnaA06g10080D	-2.30031	14.5	S-assimilation.sulfite oxidase	Symbols: SOX, AT-SO, AtSO | SOX (SULFITE OXIDASE); sulfite oxidase | chr3:314694-317431 REVERSE
BnaC05g11700D	-1.21033	14.5	S-assimilation.sulfite oxidase	Symbols: SOX, AT-SO, AtSO | SOX (SULFITE OXIDASE); sulfite oxidase | chr3:314694-317431 REVERSE
BnaA07g06240D	-12.7848	15	metal handling	Symbols: SBP3 | SBP3 (selenium-binding protein 3); selenium binding | chr3:8581654-8583835 FORWARD
BnaA08g07580D	-1.01381	15	metal handling	Symbols: EDA38, SBP2 | SBP2 (SELENIUM-BINDING PROTEIN 2); selenium binding | chr4:8100349-8102875 REVERSE
BnaAnng17380D	-1.34792	15	metal handling	selenoprotein-related | chr5:23697841-23699767 FORWARD
BnaC08g08320D	-1.39105	15	metal handling	Symbols: EDA38, SBP2 | SBP2 (SELENIUM-BINDING PROTEIN 2); selenium binding | chr4:8100349-8102875 REVERSE
BnaCnng34030D	-3.44409	15	metal handling	Symbols: ATAILP1, AILP1 | AILP1 | chr5:6423269-6426166 FORWARD
BnaCnng34110D	-1.67798	15	metal handling	Symbols: ATAILP1, AILP1 | AILP1 | chr5:6423269-6426166 FORWARD
BnaA02g31250D	-1.22534	15	metal handling	heavy-metal-associated domain-containing protein | chr5:9803764-9805160 FORWARD
BnaA03g43890D	-2.48226	15	metal handling	cadmium-responsive protein / cadmium induced protein (AS8) | chr4:10446340-10448190 REVERSE
BnaA04g06300D	-1.39502	15	metal handling	Symbols: EDA38, SBP2 | SBP2 (SELENIUM-BINDING PROTEIN 2); selenium binding | chr4:8100349-8102875 REVERSE
BnaA08g07570D	1.91254	15	metal handling	Symbols: SBP1 | SBP1 (selenium-binding protein 1); selenium binding | chr4:8097918-8100242 REVERSE
BnaC08g08310D	2.55403	15	metal handling	Symbols: SBP1 | SBP1 (selenium-binding protein 1); selenium binding | chr4:8097918-8100242 REVERSE
BnaCnng35500D	-7.88332	15	metal handling	Symbols: SBP3 | SBP3 (selenium-binding protein 3); selenium binding | chr3:8581654-8583835 FORWARD
BnaCnng60210D	-1.11566	15	metal handling	Symbols: SBP1 | SBP1 (selenium-binding protein 1); selenium binding | chr4:8097918-8100242 REVERSE
BnaA09g24640D	-2.5724	15.1	metal handling.acquisition	Symbols: ATFRO8, FRO8 | FRO8 (FERRIC REDUCTION OXIDASE 8); ferric-chelate reductase/ oxidoreductase | chr5:20415771-20418742 FORWARD
BnaA10g00390D	-1.48794	15.1	metal handling.acquisition	Symbols: FRO2, FRD1, ATFRO2 | FRO2 (FERRIC REDUCTION OXIDASE 2); ferric-chelate reductase | chr1:209395-213041 FORWARD
BnaC05g24230D	-3.04119	15.1	metal handling.acquisition	Symbols: ATFRO8, FRO8 | FRO8 (FERRIC REDUCTION OXIDASE 8); ferric-chelate reductase/ oxidoreductase | chr5:20415771-20418742 FORWARD
BnaC09g26410D	-1.49397	15.1	metal handling.acquisition	Symbols: ATFRO7, FRO7 | ATFRO7 (FERRIC REDUCTION OXIDASE 7); ferric-chelate reductase/ oxidoreductase | chr5:20205342-20208730 REVERSE
BnaCnng08750D	-2.13064	15.1	metal handling.acquisition	Symbols: FRO1, ATFRO1 | FRO1 (FERRIC REDUCTION OXIDASE 1); ferric-chelate reductase | chr1:214229-217304 FORWARD
BnaCnng65560D	-1.9782	15.1	metal handling.acquisition	Symbols: FRO2, FRD1, ATFRO2 | FRO2 (FERRIC REDUCTION OXIDASE 2); ferric-chelate reductase | chr1:209395-213041 FORWARD
BnaA03g30330D	3.9386	15.1	metal handling.acquisition	Symbols: FRD3, MAN1 | FRD3 (FERRIC REDUCTASE DEFECTIVE 3); antiporter/ transporter | chr3:2566277-2569499 REVERSE
BnaC03g35660D	3.33151	15.1	metal handling.acquisition	Symbols: FRD3, MAN1 | FRD3 (FERRIC REDUCTASE DEFECTIVE 3); antiporter/ transporter | chr3:2566277-2569499 REVERSE
BnaCnng59050D	-2.41895	15.1	metal handling.acquisition	Symbols: ATFRO5, FRO5 | FRO5 (FERRIC REDUCTION OXIDASE 5); ferric-chelate reductase | chr5:8105565-8108590 REVERSE
BnaA03g13550D	-1.30852	15.2	metal handling.binding, chelation and storage	metal ion binding | chr5:20635866-20637977 REVERSE
BnaA05g28250D	-1.82972	15.2	metal handling.binding, chelation and storage	Symbols: ATX1, ATATX1 | ATX1 (ARABIDOPSIS HOMOLOG OF ANTI-OXIDANT 1); metal ion binding | chr1:24686256-24687332 REVERSE
BnaA06g00050D	-1.96067	15.2	metal handling.binding, chelation and storage	Symbols: ATSERAT2;1, SAT5, SAT1 | ATSERAT2;1 (SERINE ACETYLTRANSFERASE 2;1); serine O-acetyltransferase | chr1:20912116-20913447 FORWARD
BnaA09g15520D	-2.65635	15.2	metal handling.binding, chelation and storage	copper chaperone (CCH)-related | chr1:21035618-21037211 FORWARD
BnaC02g41180D	-3.1307	15.2	metal handling.binding, chelation and storage	copper-binding family protein | chr5:8410258-8412240 REVERSE
BnaC03g16450D	-2.51678	15.2	metal handling.binding, chelation and storage	metal ion binding | chr5:20635866-20637977 REVERSE
BnaC03g70970D	-3.38216	15.2	metal handling.binding, chelation and storage	Symbols: ATSERAT2;1, SAT5, SAT1 | ATSERAT2;1 (SERINE ACETYLTRANSFERASE 2;1); serine O-acetyltransferase | chr1:20912116-20913447 FORWARD
BnaCnng25440D	-1.89719	15.2	metal handling.binding, chelation and storage	Symbols: ATSERAT2;1, SAT5, SAT1 | ATSERAT2;1 (SERINE ACETYLTRANSFERASE 2;1); serine O-acetyltransferase | chr1:20912116-20913447 FORWARD
BnaA07g29100D	1.17751	15.2	metal handling.binding, chelation and storage	heavy-metal-associated domain-containing protein / copper chaperone (CCH)-related | chr1:26803153-26804292 REVERSE
BnaC06g15730D	2.24738	15.2	metal handling.binding, chelation and storage	Symbols: ATFER3 | ATFER3 (ferritin 3); binding / ferric iron binding / oxidoreductase/ transition metal ion binding | chr3:20814047-20816035 REVERSE
BnaC09g47300D	1.6149	15.2	metal handling.binding, chelation and storage	IBR domain-containing protein | chr5:2845824-2847415 REVERSE
BnaA07g15730D	1.09464	15.2	metal handling.binding, chelation and storage	metal ion binding | chr2:7920508-7922326 REVERSE
BnaC04g08360D	1.95345	15.2	metal handling.binding, chelation and storage	Symbols: MAT3 | MAT3 (methionine adenosyltransferase 3); copper ion binding / methionine adenosyltransferase | chr2:15479366-15481412 REVERSE
BnaA05g07530D	2.06738	15.2	metal handling.binding, chelation and storage	Symbols: MAT3 | MAT3 (methionine adenosyltransferase 3); copper ion binding / methionine adenosyltransferase | chr2:15479366-15481412 REVERSE
BnaA06g40860D	2.96929	15.2	metal handling.binding, chelation and storage	Symbols: ATFP6, HIPP26 | ATFP6 (FARNESYLATED PROTEIN 6); metal ion binding | chr4:18034431-18035889 FORWARD
BnaC05g43490D	1.47275	15.2	metal handling.binding, chelation and storage	Symbols: MT2A, ATMT-K, ATMT-1 | MT2A (METALLOTHIONEIN 2A); copper ion binding | chr3:2889486-2890229 REVERSE
BnaC03g00160D	2.13653	15.2	metal handling.binding, chelation and storage	Symbols: ATFER1, FER1 | ATFER1; ferric iron binding / iron ion binding | chr5:227953-230051 REVERSE
BnaA03g34510D	1.4389	15.2	metal handling.binding, chelation and storage	Symbols: MTO3, SAMS3, MAT4 | MTO3 (METHIONINE OVER-ACCUMULATOR 3); methionine adenosyltransferase | chr3:5952187-5954084 REVERSE
BnaCnng16700D	2.07637	15.2	metal handling.binding, chelation and storage	Symbols: MTO3, SAMS3, MAT4 | MTO3 (METHIONINE OVER-ACCUMULATOR 3); methionine adenosyltransferase | chr3:5952187-5954084 REVERSE
BnaA08g17020D	3.0365	15.2	metal handling.binding, chelation and storage	Symbols: ATFP6, HIPP26 | ATFP6 (FARNESYLATED PROTEIN 6); metal ion binding | chr4:18034431-18035889 FORWARD
BnaC03g39970D	1.74876	15.2	metal handling.binding, chelation and storage	Symbols: MTO3, SAMS3, MAT4 | MTO3 (METHIONINE OVER-ACCUMULATOR 3); methionine adenosyltransferase | chr3:5952187-5954084 REVERSE
BnaA01g36920D	3.85555	15.2	metal handling.binding, chelation and storage	Symbols: MTO3, SAMS3, MAT4 | MTO3 (METHIONINE OVER-ACCUMULATOR 3); methionine adenosyltransferase | chr3:5952187-5954084 REVERSE
BnaC03g60050D	3.08646	15.2	metal handling.binding, chelation and storage	Symbols: ATFP6, HIPP26 | ATFP6 (FARNESYLATED PROTEIN 6); metal ion binding | chr4:18034431-18035889 FORWARD
BnaC07g47700D	4.93602	15.2	metal handling.binding, chelation and storage	Symbols: ATFP6, HIPP26 | ATFP6 (FARNESYLATED PROTEIN 6); metal ion binding | chr4:18034431-18035889 FORWARD
BnaC02g01010D	9.51833	15.2	metal handling.binding, chelation and storage	IBR domain-containing protein | chr5:2845824-2847415 REVERSE
BnaA02g32440D	-1.39382	15.2	metal handling.binding, chelation and storage	copper-binding family protein | chr5:8410258-8412240 REVERSE
BnaA03g00260D	3.9959	15.2	metal handling.binding, chelation and storage	Symbols: ATFER1, FER1 | ATFER1; ferric iron binding / iron ion binding | chr5:227953-230051 REVERSE
BnaA03g54880D	1.01122	15.2	metal handling.binding, chelation and storage	Symbols: MT2A, ATMT-K, ATMT-1 | MT2A (METALLOTHIONEIN 2A); copper ion binding | chr3:2889486-2890229 REVERSE
BnaA05g09920D	-1.34573	15.2	metal handling.binding, chelation and storage	Symbols: CUTA | CUTA; copper ion binding | chr2:14269581-14271723 FORWARD
BnaA05g13500D	-1.35064	15.2	metal handling.binding, chelation and storage	Symbols: ATSERAT2;1, SAT5, SAT1 | ATSERAT2;1 (SERINE ACETYLTRANSFERASE 2;1); serine O-acetyltransferase | chr1:20912116-20913447 FORWARD
BnaA06g05310D	1.58385	15.2	metal handling.binding, chelation and storage	Symbols: NAS3, ATNAS3 | NAS3 (NICOTIANAMINE SYNTHASE 3); nicotianamine synthase | chr1:2984881-2986130 FORWARD
BnaA06g36340D	-1.27738	15.2	metal handling.binding, chelation and storage	Symbols: CAD1, ARA8, ATPCS1, PCS1 | CAD1 (CADMIUM SENSITIVE 1); cadmium ion binding / copper ion binding / glutathione gamma-glutamylcysteinyltransferase | chr5:17734738-17737859 FORWARD
BnaA07g16710D	1.18188	15.2	metal handling.binding, chelation and storage	Symbols: ATFER3 | ATFER3 (ferritin 3); binding / ferric iron binding / oxidoreductase/ transition metal ion binding | chr3:20814047-20816035 REVERSE
BnaA09g35550D	1.28276	15.2	metal handling.binding, chelation and storage	Symbols: ATFER3 | ATFER3 (ferritin 3); binding / ferric iron binding / oxidoreductase/ transition metal ion binding | chr3:20814047-20816035 REVERSE
BnaA09g35560D	1.11187	15.2	metal handling.binding, chelation and storage	Symbols: ATFER3 | ATFER3 (ferritin 3); binding / ferric iron binding / oxidoreductase/ transition metal ion binding | chr3:20814047-20816035 REVERSE
BnaA09g50750D	4.25987	15.2	metal handling.binding, chelation and storage	Symbols: ATPCS2 | ATPCS2 (phytochelatin synthase 2); glutathione gamma-glutamylcysteinyltransferase | chr1:1018570-1022108 REVERSE
BnaA10g04950D	1.62304	15.2	metal handling.binding, chelation and storage	Symbols: MT1C | MT1C; copper ion binding | chr1:2341542-2342123 FORWARD
BnaAnng01020D	-1.63461	15.2	metal handling.binding, chelation and storage	Symbols: ATX1, ATATX1 | ATX1 (ARABIDOPSIS HOMOLOG OF ANTI-OXIDANT 1); metal ion binding | chr1:24686256-24687332 REVERSE
BnaAnng11680D	3.17949	15.2	metal handling.binding, chelation and storage	heavy-metal-associated domain-containing protein / copper chaperone (CCH)-related | chr4:16685720-16686703 REVERSE
BnaC01g03450D	4.96652	15.2	metal handling.binding, chelation and storage	heavy-metal-associated domain-containing protein / copper chaperone (CCH)-related | chr4:16685720-16686703 REVERSE
BnaC02g44160D	-5.54579	15.2	metal handling.binding, chelation and storage	heavy-metal-associated domain-containing protein / copper chaperone (CCH)-related | chr5:5755322-5756888 FORWARD
BnaC03g00710D	-1.232	15.2	metal handling.binding, chelation and storage	Symbols: MT2A, ATMT-K, ATMT-1 | MT2A (METALLOTHIONEIN 2A); copper ion binding | chr3:2889486-2890229 REVERSE
BnaC03g43740D	-4.01381	15.2	metal handling.binding, chelation and storage	copper-binding family protein | chr3:8880065-8881722 REVERSE
BnaC03g59740D	1.22362	15.2	metal handling.binding, chelation and storage	SIT4 phosphatase-associated family protein | chr1:10779171-10786666 FORWARD
BnaC04g10980D	1.0567	15.2	metal handling.binding, chelation and storage	Symbols: ATSERAT2;1, SAT5, SAT1 | ATSERAT2;1 (SERINE ACETYLTRANSFERASE 2;1); serine O-acetyltransferase | chr1:20912116-20913447 FORWARD
BnaC06g14030D	1.10962	15.2	metal handling.binding, chelation and storage	metal ion binding | chr2:7920508-7922326 REVERSE
BnaC08g27000D	1.862	15.2	metal handling.binding, chelation and storage	Symbols: ATFER3 | ATFER3 (ferritin 3); binding / ferric iron binding / oxidoreductase/ transition metal ion binding | chr3:20814047-20816035 REVERSE
BnaC08g43630D	-1.9642	15.2	metal handling.binding, chelation and storage	Symbols: ATPCS2 | ATPCS2 (phytochelatin synthase 2); glutathione gamma-glutamylcysteinyltransferase | chr1:1018570-1022108 REVERSE
BnaCnng27040D	-1.19432	15.2	metal handling.binding, chelation and storage	Symbols: CAD1, ARA8, ATPCS1, PCS1 | CAD1 (CADMIUM SENSITIVE 1); cadmium ion binding / copper ion binding / glutathione gamma-glutamylcysteinyltransferase | chr5:17734738-17737859 FORWARD
BnaCnng40400D	1.37158	15.2	metal handling.binding, chelation and storage	Symbols: MT2A, ATMT-K, ATMT-1 | MT2A (METALLOTHIONEIN 2A); copper ion binding | chr3:2889486-2890229 REVERSE
BnaC08g11080D	-1.19357	16.1	secondary metabolism.isoprenoids	Symbols: CAMS1 | CAMS1 (Camelliol C synthase 1); beta-amyrin synthase | chr1:29689153-29694255 REVERSE
BnaA01g05120D	-3.94789	16.2	secondary metabolism.phenylpropanoids	O-methyltransferase family 2 protein | chr1:29130403-29132180 FORWARD
BnaA04g08490D	-3.41562	16.2	secondary metabolism.phenylpropanoids	transferase family protein | chr5:15217910-15219372 REVERSE
BnaA07g05510D	-3.43296	16.2	secondary metabolism.phenylpropanoids	transferase family protein | chr3:18637854-18639185 FORWARD
BnaA07g12070D	-3.56512	16.2	secondary metabolism.phenylpropanoids	transferase family protein | chr5:26795771-26797312 REVERSE
BnaA07g20940D	-2.43957	16.2	secondary metabolism.phenylpropanoids	O-methyltransferase family 2 protein | chr1:29130403-29132180 FORWARD
BnaAnng03710D	-1.47862	16.2	secondary metabolism.phenylpropanoids	transferase family protein | chr3:18635920-18637341 FORWARD
BnaAnng13950D	-6.51148	16.2	secondary metabolism.phenylpropanoids	transferase family protein | chr5:84474-86275 FORWARD
BnaC02g03740D	-5.15528	16.2	secondary metabolism.phenylpropanoids	transferase family protein | chr5:84474-86275 FORWARD
BnaC02g34490D	-2.72831	16.2	secondary metabolism.phenylpropanoids	cinnamoyl-CoA reductase family | chr2:631236-632575 REVERSE
BnaC04g56240D	-1.77475	16.2	secondary metabolism.phenylpropanoids	cinnamoyl-CoA reductase-related | chr2:10177834-10180064 FORWARD
BnaC06g20760D	-1.56097	16.2	secondary metabolism.phenylpropanoids	aminotransferase class I and II family protein | chr1:29188901-29190975 REVERSE
BnaC06g20930D	-2.56327	16.2	secondary metabolism.phenylpropanoids	O-methyltransferase family 2 protein | chr1:29130403-29132180 FORWARD
BnaC06g37280D	-3.90345	16.2	secondary metabolism.phenylpropanoids	3-beta-hydroxy-delta5-steroid dehydrogenase/ binding / catalytic/ cinnamoyl-CoA reductase | chr1:28689770-28691449 REVERSE
BnaC07g07070D	-4.20945	16.2	secondary metabolism.phenylpropanoids	transferase family protein | chr3:18637854-18639185 FORWARD
BnaC07g16220D	-3.79906	16.2	secondary metabolism.phenylpropanoids	transferase family protein | chr5:26795771-26797312 REVERSE
BnaC07g17120D	-1.23605	16.2	secondary metabolism.phenylpropanoids	O-methyltransferase family 2 protein | chr1:29130403-29132180 FORWARD
BnaC08g21660D	-1.93618	16.2	secondary metabolism.phenylpropanoids	transferase family protein | chr3:18635920-18637341 FORWARD
BnaC09g10950D	-2.36257	16.2	secondary metabolism.phenylpropanoids	Symbols: ACOS5 | ACOS5 (ACYL-COA SYNTHETASE 5); 4-coumarate-CoA ligase/ long-chain-fatty-acid-CoA ligase/ medium-chain-fatty-acid-CoA ligase | chr1:23310535-23312747 FORWARD
BnaA04g22470D	1.12054	16.2	secondary metabolism.phenylpropanoids	transferase family protein | chr2:16803092-16804741 REVERSE
BnaC06g15240D	1.62272	16.2	secondary metabolism.phenylpropanoids	transferase family protein | chr5:26795771-26797312 REVERSE
BnaAnng21320D	3.11387	16.2	secondary metabolism.phenylpropanoids	transferase family protein | chr2:16803092-16804741 REVERSE
BnaA05g16430D	1.44184	16.2	secondary metabolism.phenylpropanoids	Symbols: ATPRR1, PRR1 | PRR1 (PINORESINOL REDUCTASE 1); pinoresinol reductase | chr1:11546338-11547994 REVERSE
BnaCnng27890D	2.75726	16.2	secondary metabolism.phenylpropanoids	transferase family protein | chr2:16803092-16804741 REVERSE
BnaA02g18290D	-7.64386	16.2	secondary metabolism.phenylpropanoids	O-methyltransferase family 2 protein | chr1:29130403-29132180 FORWARD
BnaA02g26380D	-1.8685	16.2	secondary metabolism.phenylpropanoids	cinnamoyl-CoA reductase family | chr2:631236-632575 REVERSE
BnaA04g20860D	-4.9251	16.2	secondary metabolism.phenylpropanoids	transferase family protein | chr5:26795771-26797312 REVERSE
BnaA07g11430D	-2.26303	16.2	secondary metabolism.phenylpropanoids	4-coumarate-CoA ligase | chr1:7100502-7102915 REVERSE
BnaA08g21760D	-2.00226	16.2	secondary metabolism.phenylpropanoids	Symbols: OPCL1 | OPCL1 (OPC-8:0 COA LIGASE1); 4-coumarate-CoA ligase | chr1:7103454-7105881 REVERSE
BnaA09g27140D	1.03852	16.2	secondary metabolism.phenylpropanoids	transferase family protein | chr1:10078189-10080029 FORWARD
BnaA09g54240D	1.42381	16.2	secondary metabolism.phenylpropanoids	transferase family protein | chr1:11271228-11273294 REVERSE
BnaAnng06350D	2.65535	16.2	secondary metabolism.phenylpropanoids	transferase family protein | chr5:2513794-2515418 FORWARD
BnaC03g65510D	-2.71554	16.2	secondary metabolism.phenylpropanoids	O-methyltransferase family 2 protein | chr4:16730760-16732811 REVERSE
BnaC04g30610D	-3.77871	16.2	secondary metabolism.phenylpropanoids	transferase family protein | chr5:15217910-15219372 REVERSE
BnaC04g44000D	1.23378	16.2	secondary metabolism.phenylpropanoids	cinnamoyl-CoA reductase family | chr2:14224268-14226602 FORWARD
BnaC04g46870D	1.06054	16.2	secondary metabolism.phenylpropanoids	transferase family protein | chr2:16803092-16804741 REVERSE
BnaC05g15810D	-3.19438	16.2	secondary metabolism.phenylpropanoids	4-coumarate--CoA ligase family protein / 4-coumaroyl-CoA synthase family protein | chr1:7094833-7097114 REVERSE
BnaC07g48680D	-1.01254	16.2	secondary metabolism.phenylpropanoids	O-methyltransferase family 2 protein | chr1:29130403-29132180 FORWARD
BnaC08g19310D	-1.24839	16.2	secondary metabolism.phenylpropanoids	Symbols: OPCL1 | OPCL1 (OPC-8:0 COA LIGASE1); 4-coumarate-CoA ligase | chr1:7103454-7105881 REVERSE
BnaC09g23250D	2.23947	16.2	secondary metabolism.phenylpropanoids	O-methyltransferase family 2 protein | chr1:29130403-29132180 FORWARD
BnaA02g13310D	-1.3742	16.7	secondary metabolism.wax	Symbols: YBR159, KCR1 | YBR159; ketoreductase/ oxidoreductase | chr1:25391460-25393610 FORWARD
BnaA03g10070D	-2.10972	16.7	secondary metabolism.wax	Symbols: FLP1, YRE, CER3, WAX2 | CER3 (ECERIFERUM 3); binding / catalytic/ iron ion binding / oxidoreductase | chr5:23420209-23424052 FORWARD
BnaA06g13650D	-2.29634	16.7	secondary metabolism.wax	Symbols: KCS4 | KCS4 (3-KETOACYL-COA SYNTHASE 4); acyltransferase/ catalytic/ transferase, transferring acyl groups other than amino-acyl groups | chr1:6728984-6730931 FORWARD
BnaA10g11680D	-1.87321	16.7	secondary metabolism.wax	Symbols: FLP1, YRE, CER3, WAX2 | CER3 (ECERIFERUM 3); binding / catalytic/ iron ion binding / oxidoreductase | chr5:23420209-23424052 FORWARD
BnaC03g14290D	-2.95641	16.7	secondary metabolism.wax	membrane bound O-acyl transferase (MBOAT) family protein / wax synthase-related | chr5:22442356-22443393 REVERSE
BnaC06g28830D	-1.12294	16.7	secondary metabolism.wax	Symbols: YBR159, KCR1 | YBR159; ketoreductase/ oxidoreductase | chr1:25391460-25393610 FORWARD
BnaC09g08890D	-2.71989	16.7	secondary metabolism.wax	Symbols: KCS9 | KCS9 (3-KETOACYL-COA SYNTHASE 9); acyltransferase/ catalytic/ transferase, transferring acyl groups other than amino-acyl groups | chr2:7050944-7052897 FORWARD
BnaA04g29140D	-1.26005	16.7	secondary metabolism.wax	catalytic/ iron ion binding / oxidoreductase | chr2:15810581-15814208 REVERSE
BnaA05g06830D	11.3257	16.7	secondary metabolism.wax	catalytic/ iron ion binding / oxidoreductase | chr2:15810581-15814208 REVERSE
BnaC04g07690D	6.53916	16.7	secondary metabolism.wax	catalytic/ iron ion binding / oxidoreductase | chr2:15810581-15814208 REVERSE
BnaC08g36720D	-1.27679	16.7	secondary metabolism.wax	Symbols: KCS4 | KCS4 (3-KETOACYL-COA SYNTHASE 4); acyltransferase/ catalytic/ transferase, transferring acyl groups other than amino-acyl groups | chr1:6728984-6730931 FORWARD
BnaA02g10670D	-1.26414	16.99	secondary metabolism.unspecified	ornithine cyclodeaminase/mu-crystallin family protein | chr5:21399331-21400603 FORWARD
BnaA10g11520D	-1.82766	16.99	secondary metabolism.unspecified	Symbols: BIO1 | BIO1 (biotin auxotroph 1); adenosylmethionine-8-amino-7-oxononanoate transaminase | chr5:23318508-23322770 REVERSE
BnaC03g12880D	-1.56635	16.99	secondary metabolism.unspecified	Symbols: BIO1 | BIO1 (biotin auxotroph 1); adenosylmethionine-8-amino-7-oxononanoate transaminase | chr5:23318508-23322770 REVERSE
BnaC06g05970D	6.90689	16.99	secondary metabolism.unspecified	Symbols: BIO1 | BIO1 (biotin auxotroph 1); adenosylmethionine-8-amino-7-oxononanoate transaminase | chr5:23318508-23322770 REVERSE
BnaC09g50710D	-1.57017	16.99	secondary metabolism.unspecified	Symbols: ATBIOF | ATBIOF (BIOTIN F); 8-amino-7-oxononanoate synthase/ transaminase | chr5:1327213-1330091 FORWARD
BnaC08g34420D	-1.34485	17	hormone metabolism	Symbols: ACL, ATMES2, MES2, ATME8, ME8 | ACL (ACETONE-CYANOHYDRIN LYASE); hydrolase/ hydrolase, acting on ester bonds / methyl indole-3-acetate esterase/ methyl jasmonate esterase/ methyl salicylate esterase | chr2:10042199-10043673 REVERSE
BnaA05g28050D	-1.25707	17.2	hormone metabolism.auxin	Symbols: MES17, ATMES17 | MES17 (METHYL ESTERASE 17); hydrolase/ hydrolase, acting on ester bonds / methyl indole-3-acetate esterase | chr3:3401078-3402672 REVERSE
BnaA01g25380D	-2.19493	18	Co-factor and vitamine metabolism	Symbols: NADK1, ATNADK-1 | NADK1 (NAD KINASE 1); NAD+ kinase/ NADH kinase/ calmodulin binding | chr3:7380191-7383980 REVERSE
BnaA02g26970D	-1.15124	18	Co-factor and vitamine metabolism	Symbols: QPT | QPT (QUINOLINATE PHOSHORIBOSYLTRANSFERASE); nicotinate-nucleotide diphosphorylase (carboxylating) | chr2:165141-167259 REVERSE
BnaA03g10340D	-3.79494	18	Co-factor and vitamine metabolism	UbiE/COQ5 methyltransferase family protein | chr5:23208561-23211090 REVERSE
BnaA04g27170D	-2.15819	18	Co-factor and vitamine metabolism	pyridoxine 5'-phosphate oxidase-related | chr2:19129241-19130595 REVERSE
BnaA10g02760D	-2.09615	18	Co-factor and vitamine metabolism	coenzyme F420 hydrogenase family / dehydrogenase, beta subunit family | chr1:1282741-1286584 REVERSE
BnaA10g09920D	-1.16382	18	Co-factor and vitamine metabolism	Symbols: AtNMNAT | AtNMNAT (A. thaliana nicotinate/nicotinamide mononucleotide adenyltransferase); nicotinamide-nucleotide adenylyltransferase/ nicotinate-nucleotide adenylyltransferase | chr5:22584008-22586301 REVERSE
BnaA10g11360D	-1.19594	18	Co-factor and vitamine metabolism	UbiE/COQ5 methyltransferase family protein | chr5:23208561-23211090 REVERSE
BnaC03g13010D	-2.63364	18	Co-factor and vitamine metabolism	UbiE/COQ5 methyltransferase family protein | chr5:23208561-23211090 REVERSE
BnaC03g14040D	-3.47354	18	Co-factor and vitamine metabolism	Symbols: AtNMNAT | AtNMNAT (A. thaliana nicotinate/nicotinamide mononucleotide adenyltransferase); nicotinamide-nucleotide adenylyltransferase/ nicotinate-nucleotide adenylyltransferase | chr5:22584008-22586301 REVERSE
BnaC04g50900D	-2.42717	18	Co-factor and vitamine metabolism	pyridoxine 5'-phosphate oxidase-related | chr2:19129241-19130595 REVERSE
BnaC05g49020D	-1.59868	18	Co-factor and vitamine metabolism	Symbols: LIP2 | LIP2 (LIPOYLTRANSFERASE 2); lipoyltransferase | chr1:1292080-1293357 FORWARD
BnaC05g49040D	-1.23119	18	Co-factor and vitamine metabolism	coenzyme F420 hydrogenase family / dehydrogenase, beta subunit family | chr1:1282741-1286584 REVERSE
BnaC09g32370D	-1.15161	18	Co-factor and vitamine metabolism	Symbols: AtNMNAT | AtNMNAT (A. thaliana nicotinate/nicotinamide mononucleotide adenyltransferase); nicotinamide-nucleotide adenylyltransferase/ nicotinate-nucleotide adenylyltransferase | chr5:22584008-22586301 REVERSE
BnaC09g32920D	-1.25206	18	Co-factor and vitamine metabolism	UbiE/COQ5 methyltransferase family protein | chr5:23208561-23211090 REVERSE
BnaA01g06090D	-2.25096	18	Co-factor and vitamine metabolism	lipoyltransferase (LIP2p) | chr4:15114250-15115633 FORWARD
BnaA03g00380D	2.09888	18	Co-factor and vitamine metabolism	Symbols: PDX1, ATPDX1.3, RSR4, PDX1.3, ATPDX1 | RSR4 (REDUCED SUGAR RESPONSE 4); protein heterodimerization/ protein homodimerization | chr5:172318-173614 REVERSE
BnaA03g11210D	-3.69632	18	Co-factor and vitamine metabolism	Symbols: AtNMNAT | AtNMNAT (A. thaliana nicotinate/nicotinamide mononucleotide adenyltransferase); nicotinamide-nucleotide adenylyltransferase/ nicotinate-nucleotide adenylyltransferase | chr5:22584008-22586301 REVERSE
BnaA03g36020D	1.86886	18	Co-factor and vitamine metabolism	Symbols: NADK1, ATNADK-1 | NADK1 (NAD KINASE 1); NAD+ kinase/ NADH kinase/ calmodulin binding | chr3:7380191-7383980 REVERSE
BnaAnng17540D	-2.16685	18	Co-factor and vitamine metabolism	Symbols: NADK1, ATNADK-1 | NADK1 (NAD KINASE 1); NAD+ kinase/ NADH kinase/ calmodulin binding | chr3:7380191-7383980 REVERSE
BnaC02g33940D	-1.06582	18	Co-factor and vitamine metabolism	Symbols: QPT | QPT (QUINOLINATE PHOSHORIBOSYLTRANSFERASE); nicotinate-nucleotide diphosphorylase (carboxylating) | chr2:165141-167259 REVERSE
BnaA10g09380D	-1.01613	18.1	Co-factor and vitamine metabolism.molybdenum cofactor	Symbols: CNX5, SIR1 | CNX5 (CO-FACTOR FOR NITRATE, REDUCTASE AND XANTHINE DEHYDROGENASE 5); Mo-molybdopterin cofactor sulfurase | chr5:22373180-22376086 REVERSE
BnaC02g13300D	-2.08135	18.1	Co-factor and vitamine metabolism.molybdenum cofactor	Symbols: CNX5, SIR1 | CNX5 (CO-FACTOR FOR NITRATE, REDUCTASE AND XANTHINE DEHYDROGENASE 5); Mo-molybdopterin cofactor sulfurase | chr5:22373180-22376086 REVERSE
BnaC04g03060D	-1.49392	18.1	Co-factor and vitamine metabolism.molybdenum cofactor	molybdopterin biosynthesis MoaE family protein | chr2:18132782-18134068 FORWARD
BnaC09g31780D	-2.52063	18.1	Co-factor and vitamine metabolism.molybdenum cofactor	Symbols: CNX5, SIR1 | CNX5 (CO-FACTOR FOR NITRATE, REDUCTASE AND XANTHINE DEHYDROGENASE 5); Mo-molybdopterin cofactor sulfurase | chr5:22373180-22376086 REVERSE
BnaCnng08640D	-2.27338	18.1	Co-factor and vitamine metabolism.molybdenum cofactor	Symbols: CNX3 | CNX3 (COFACTOR OF NITRATE REDUCTASE AND XANTHINE DEHYDROGENASE 3); catalytic | chr1:114286-115549 FORWARD
BnaA09g17270D	1.63569	18.1	Co-factor and vitamine metabolism.molybdenum cofactor	molybdenum cofactor sulfurase family protein | chr5:18042971-18045496 FORWARD
BnaC09g18290D	2.02998	18.1	Co-factor and vitamine metabolism.molybdenum cofactor	molybdenum cofactor sulfurase family protein | chr5:18042971-18045496 FORWARD
BnaC09g24670D	-1.42348	18.1	Co-factor and vitamine metabolism.molybdenum cofactor	Symbols: CNX7, SIR5 | CNX7; catalytic | chr4:6308683-6309546 FORWARD
BnaA03g55730D	-3.92376	18.11	Co-factor and vitamine metabolism.lipoic acid	lipoic acid synthase family protein | chr5:2710817-2713132 REVERSE
BnaAnng06100D	-1.90148	18.11	Co-factor and vitamine metabolism.lipoic acid	lipoic acid synthase family protein | chr5:2710817-2713132 REVERSE
BnaC02g01120D	-3.33539	18.11	Co-factor and vitamine metabolism.lipoic acid	lipoic acid synthase family protein | chr5:2710817-2713132 REVERSE
BnaC03g03580D	-2.29045	18.11	Co-factor and vitamine metabolism.lipoic acid	lipoic acid synthase family protein | chr5:2710817-2713132 REVERSE
BnaA02g18940D	-1.16684	18.12	Co-factor and vitamine metabolism.NADH kinase	Symbols: NADK3, ATNADK-3 | NADK3 (NAD(H) KINASE 3); NAD+ kinase/ NADH kinase | chr1:29564249-29566375 FORWARD
BnaC02g25050D	-1.34829	18.12	Co-factor and vitamine metabolism.NADH kinase	Symbols: NADK3, ATNADK-3 | NADK3 (NAD(H) KINASE 3); NAD+ kinase/ NADH kinase | chr1:29564249-29566375 FORWARD
BnaA05g23500D	-1.43808	18.13	Co-factor and vitamine metabolism.isochorismatase	isochorismatase hydrolase family protein | chr3:5489701-5491248 REVERSE
BnaA02g09460D	-1.56385	18.2	Co-factor and vitamine metabolism.thiamine	Symbols: THI1, TZ, THI4 | THI1; protein homodimerization | chr5:22246592-22248332 FORWARD
BnaA02g27980D	-2.37307	18.2	Co-factor and vitamine metabolism.thiamine	Symbols: THI1, TZ, THI4 | THI1; protein homodimerization | chr5:22246592-22248332 FORWARD
BnaA03g11710D	-1.41192	18.2	Co-factor and vitamine metabolism.thiamine	Symbols: THI1, TZ, THI4 | THI1; protein homodimerization | chr5:22246592-22248332 FORWARD
BnaA03g33660D	-2.18293	18.2	Co-factor and vitamine metabolism.thiamine	4-methyl-5(b-hydroxyethyl)-thiazole monophosphate biosynthesis protein, putative | chr3:5047400-5049877 FORWARD
BnaA05g24540D	-1.74475	18.2	Co-factor and vitamine metabolism.thiamine	4-methyl-5(b-hydroxyethyl)-thiazole monophosphate biosynthesis protein, putative | chr3:5047400-5049877 FORWARD
BnaA07g05920D	-1.65465	18.2	Co-factor and vitamine metabolism.thiamine	hydroxyethylthiazole kinase family protein | chr3:8679552-8680824 REVERSE
BnaA10g08550D	-1.52316	18.2	Co-factor and vitamine metabolism.thiamine	Symbols: THI1, TZ, THI4 | THI1; protein homodimerization | chr5:22246592-22248332 FORWARD
BnaC03g38830D	-3.07469	18.2	Co-factor and vitamine metabolism.thiamine	4-methyl-5(b-hydroxyethyl)-thiazole monophosphate biosynthesis protein, putative | chr3:5047400-5049877 FORWARD
BnaC04g54380D	-1.33253	18.2	Co-factor and vitamine metabolism.thiamine	Symbols: THIC | THIC (ThiaminC); ADP-ribose pyrophosphohydrolase/ catalytic/ iron-sulfur cluster binding | chr2:12667034-12670311 FORWARD
BnaC09g31160D	-1.69674	18.2	Co-factor and vitamine metabolism.thiamine	Symbols: THI1, TZ, THI4 | THI1; protein homodimerization | chr5:22246592-22248332 FORWARD
BnaC04g28590D	1.97285	18.2	Co-factor and vitamine metabolism.thiamine	4-methyl-5(b-hydroxyethyl)-thiazole monophosphate biosynthesis protein, putative | chr3:5047400-5049877 FORWARD
BnaA01g11320D	-1.03575	18.3	Co-factor and vitamine metabolism.riboflavin	Symbols: ATFMN/FHY | ATFMN/FHY (riboflavin kinase/FMN hydrolase); FMN adenylyltransferase/ riboflavin kinase | chr4:11431105-11433322 FORWARD
BnaA03g02490D	-1.76134	18.3	Co-factor and vitamine metabolism.riboflavin	riboflavin biosynthesis protein-related | chr5:2683832-2685636 FORWARD
BnaC03g03500D	-2.07954	18.3	Co-factor and vitamine metabolism.riboflavin	riboflavin biosynthesis protein-related | chr5:2683832-2685636 FORWARD
BnaA09g08830D	-1.68504	18.7	Co-factor and vitamine metabolism.iron-sulphur clusters	hesB-like domain-containing protein | chr2:7248138-7250291 FORWARD
BnaA10g06200D	-1.47607	18.7	Co-factor and vitamine metabolism.iron-sulphur clusters	Symbols: QS, OLD5, SUFE3 | QS (QUINOLINATE SYNTHASE); 4 iron, 4 sulfur cluster binding / enzyme activator/ protein homodimerization/ quinolinate synthetase A | chr5:20442647-20445991 FORWARD
BnaCnng77330D	-1.21242	18.7	Co-factor and vitamine metabolism.iron-sulphur clusters	Symbols: QS, OLD5, SUFE3 | QS (QUINOLINATE SYNTHASE); 4 iron, 4 sulfur cluster binding / enzyme activator/ protein homodimerization/ quinolinate synthetase A | chr5:20442647-20445991 FORWARD
BnaC05g32810D	1.25171	18.7	Co-factor and vitamine metabolism.iron-sulphur clusters	Symbols: NBP35 | NBP35 (NUCLEOTIDE BINDING PROTEIN 35); iron-sulfur cluster binding / nucleotide binding / protein homodimerization | chr5:20734167-20736055 FORWARD
BnaA05g19320D	1.35702	18.7	Co-factor and vitamine metabolism.iron-sulphur clusters	Symbols: NBP35 | NBP35 (NUCLEOTIDE BINDING PROTEIN 35); iron-sulfur cluster binding / nucleotide binding / protein homodimerization | chr5:20734167-20736055 FORWARD
BnaA01g15620D	-1.17389	18.7	Co-factor and vitamine metabolism.iron-sulphur clusters	Symbols: EMB1374, CPSUFE, ATSUFE, SUFE1 | CPSUFE (CHLOROPLAST SULFUR E); enzyme activator/ transcription regulator | chr4:13382198-13383641 REVERSE
BnaAnng14080D	2.35445	18.7	Co-factor and vitamine metabolism.iron-sulphur clusters	Symbols: SUFE2 | SUFE2 (SULFUR E 2); enzyme activator | chr1:25426488-25427349 FORWARD
BnaC02g17580D	1.07522	18.7	Co-factor and vitamine metabolism.iron-sulphur clusters	Symbols: SUFE2 | SUFE2 (SULFUR E 2); enzyme activator | chr1:25426488-25427349 FORWARD
BnaCnng10620D	1.00886	18.7	Co-factor and vitamine metabolism.iron-sulphur clusters	hesB-like domain-containing protein | chr5:1052580-1054274 FORWARD
BnaA10g28220D	-1.16665	19	tetrapyrrole synthesis	tetrapyrrole methylase family protein | chr1:17052534-17054792 FORWARD
BnaA09g19510D	-1.21657	19.1	tetrapyrrole synthesis.glu-tRNA synthetase	glutamyl-tRNA(Gln) amidotransferase, putative | chr3:9339423-9342204 REVERSE
BnaC09g52600D	-1.33783	19.1	tetrapyrrole synthesis.glu-tRNA synthetase	glutamyl-tRNA(Gln) amidotransferase, putative | chr3:9339423-9342204 REVERSE
BnaA01g14420D	-2.16832	19.11	tetrapyrrole synthesis.magnesium protoporphyrin IX methyltransferase	Symbols: CHLM | CHLM (magnesium-protoporphyrin IX methyltransferase); magnesium protoporphyrin IX methyltransferase | chr4:12876948-12878647 FORWARD
BnaA03g47110D	-1.99609	19.11	tetrapyrrole synthesis.magnesium protoporphyrin IX methyltransferase	Symbols: CHLM | CHLM (magnesium-protoporphyrin IX methyltransferase); magnesium protoporphyrin IX methyltransferase | chr4:12876948-12878647 FORWARD
BnaC01g17000D	-1.57677	19.11	tetrapyrrole synthesis.magnesium protoporphyrin IX methyltransferase	Symbols: CHLM | CHLM (magnesium-protoporphyrin IX methyltransferase); magnesium protoporphyrin IX methyltransferase | chr4:12876948-12878647 FORWARD
BnaC07g39280D	-1.74393	19.11	tetrapyrrole synthesis.magnesium protoporphyrin IX methyltransferase	Symbols: CHLM | CHLM (magnesium-protoporphyrin IX methyltransferase); magnesium protoporphyrin IX methyltransferase | chr4:12876948-12878647 FORWARD
BnaA10g16310D	-1.6108	19.13	tetrapyrrole synthesis.divinyl chlorophyllide-a 8-vinyl-reductase	Symbols: PCB2 | PCB2 (PALE-GREEN AND CHLOROPHYLL B REDUCED 2); 3,8-divinyl protochlorophyllide a 8-vinyl reductase | chr5:6220781-6222228 REVERSE
BnaC09g39160D	-2.47892	19.13	tetrapyrrole synthesis.divinyl chlorophyllide-a 8-vinyl-reductase	Symbols: PCB2 | PCB2 (PALE-GREEN AND CHLOROPHYLL B REDUCED 2); 3,8-divinyl protochlorophyllide a 8-vinyl reductase | chr5:6220781-6222228 REVERSE
BnaA01g16440D	-3.04066	19.14	tetrapyrrole synthesis.protochlorophyllide reductase	Symbols: PORB | PORB (PROTOCHLOROPHYLLIDE OXIDOREDUCTASE B); oxidoreductase/ protochlorophyllide reductase | chr4:13725546-13727353 FORWARD
BnaA03g48610D	-2.61086	19.14	tetrapyrrole synthesis.protochlorophyllide reductase	Symbols: PORB | PORB (PROTOCHLOROPHYLLIDE OXIDOREDUCTASE B); oxidoreductase/ protochlorophyllide reductase | chr4:13725546-13727353 FORWARD
BnaA08g27540D	-1.18382	19.14	tetrapyrrole synthesis.protochlorophyllide reductase	Symbols: POR C, PORC | POR C (PROTOCHLOROPHYLLIDE OXIDOREDUCTASE); NADPH dehydrogenase/ oxidoreductase/ protochlorophyllide reductase | chr1:907642-909376 FORWARD
BnaA10g02050D	-1.39114	19.14	tetrapyrrole synthesis.protochlorophyllide reductase	Symbols: POR C, PORC | POR C (PROTOCHLOROPHYLLIDE OXIDOREDUCTASE); NADPH dehydrogenase/ oxidoreductase/ protochlorophyllide reductase | chr1:907642-909376 FORWARD
BnaC01g19630D	-2.63278	19.14	tetrapyrrole synthesis.protochlorophyllide reductase	Symbols: PORB | PORB (PROTOCHLOROPHYLLIDE OXIDOREDUCTASE B); oxidoreductase/ protochlorophyllide reductase | chr4:13725546-13727353 FORWARD
BnaC05g01980D	-1.42742	19.14	tetrapyrrole synthesis.protochlorophyllide reductase	Symbols: POR C, PORC | POR C (PROTOCHLOROPHYLLIDE OXIDOREDUCTASE); NADPH dehydrogenase/ oxidoreductase/ protochlorophyllide reductase | chr1:907642-909376 FORWARD
BnaC07g40900D	-2.22841	19.14	tetrapyrrole synthesis.protochlorophyllide reductase	Symbols: PORB | PORB (PROTOCHLOROPHYLLIDE OXIDOREDUCTASE B); oxidoreductase/ protochlorophyllide reductase | chr4:13725546-13727353 FORWARD
BnaC08g05120D	1.95558	19.16	tetrapyrrole synthesis.chlorophyll b synthase	Symbols: CH1, ATCAO, CAO | CH1 (CHLORINA 1); chlorophyllide a oxygenase | chr1:16848359-16851224 REVERSE
BnaA01g20360D	-1.89229	19.2	tetrapyrrole synthesis.glu-tRNA reductase	Symbols: HEMA2 | HEMA2; glutamyl-tRNA reductase | chr1:3236995-3239554 REVERSE
BnaA01g35850D	1.2812	19.2	tetrapyrrole synthesis.glu-tRNA reductase	Symbols: HEMA1 | HEMA1; glutamyl-tRNA reductase | chr1:21623726-21626200 REVERSE
BnaA09g57180D	-1.93874	19.2	tetrapyrrole synthesis.glu-tRNA reductase	Symbols: HEMA2 | HEMA2; glutamyl-tRNA reductase | chr1:3236995-3239554 REVERSE
BnaC08g42480D	-3.16853	19.2	tetrapyrrole synthesis.glu-tRNA reductase	Symbols: HEMA2 | HEMA2; glutamyl-tRNA reductase | chr1:3236995-3239554 REVERSE
BnaA07g12810D	-1.18686	19.21	tetrapyrrole synthesis.heme oxygenase	Symbols: ATHO1, HO1, TED4, GUN2, HY6 | TED4 (REVERSAL OF THE DET PHENOTYPE 4); heme oxygenase (decyclizing) | chr2:11341684-11343572 FORWARD
BnaA09g27040D	1.421	19.21	tetrapyrrole synthesis.heme oxygenase	Symbols: ATHO1, HO1, TED4, GUN2, HY6 | TED4 (REVERSAL OF THE DET PHENOTYPE 4); heme oxygenase (decyclizing) | chr2:11341684-11343572 FORWARD
BnaA06g22720D	-1.07585	19.3	tetrapyrrole synthesis.GSA	Symbols: GSA1 | GSA1 (GLUTAMATE-1-SEMIALDEHYDE-2,1-AMINOMUTASE); glutamate-1-semialdehyde 2,1-aminomutase | chr5:25451875-25453841 FORWARD
BnaA09g06670D	-1.04907	19.3	tetrapyrrole synthesis.GSA	Symbols: GSA1 | GSA1 (GLUTAMATE-1-SEMIALDEHYDE-2,1-AMINOMUTASE); glutamate-1-semialdehyde 2,1-aminomutase | chr5:25451875-25453841 FORWARD
BnaC03g74650D	-1.10916	19.3	tetrapyrrole synthesis.GSA	Symbols: GSA1 | GSA1 (GLUTAMATE-1-SEMIALDEHYDE-2,1-AMINOMUTASE); glutamate-1-semialdehyde 2,1-aminomutase | chr5:25451875-25453841 FORWARD
BnaC09g05970D	-1.11001	19.3	tetrapyrrole synthesis.GSA	Symbols: GSA1 | GSA1 (GLUTAMATE-1-SEMIALDEHYDE-2,1-AMINOMUTASE); glutamate-1-semialdehyde 2,1-aminomutase | chr5:25451875-25453841 FORWARD
BnaC06g27900D	-2.4657	19.4	tetrapyrrole synthesis.ALA dehydratase	Symbols: HEMB1 | HEMB1; catalytic/ metal ion binding / porphobilinogen synthase | chr1:26231804-26234963 FORWARD
BnaA07g28250D	-1.04634	19.4	tetrapyrrole synthesis.ALA dehydratase	Symbols: HEMB1 | HEMB1; catalytic/ metal ion binding / porphobilinogen synthase | chr1:26231804-26234963 FORWARD
BnaC06g27910D	-1.33972	19.4	tetrapyrrole synthesis.ALA dehydratase	Symbols: HEMB1 | HEMB1; catalytic/ metal ion binding / porphobilinogen synthase | chr1:26231804-26234963 FORWARD
BnaA03g02420D	-3.18137	19.5	tetrapyrrole synthesis.porphobilinogen deaminase	Symbols: HEMC | HEMC (HYDROXYMETHYLBILANE SYNTHASE); hydroxymethylbilane synthase | chr5:2663499-2665792 REVERSE
BnaAnng06210D	-2.40241	19.5	tetrapyrrole synthesis.porphobilinogen deaminase	Symbols: HEMC | HEMC (HYDROXYMETHYLBILANE SYNTHASE); hydroxymethylbilane synthase | chr5:2663499-2665792 REVERSE
BnaC02g01240D	-2.06451	19.5	tetrapyrrole synthesis.porphobilinogen deaminase	Symbols: HEMC | HEMC (HYDROXYMETHYLBILANE SYNTHASE); hydroxymethylbilane synthase | chr5:2663499-2665792 REVERSE
BnaA10g23080D	-1.03784	19.5	tetrapyrrole synthesis.porphobilinogen deaminase	Symbols: HEMC | HEMC (HYDROXYMETHYLBILANE SYNTHASE); hydroxymethylbilane synthase | chr5:2663499-2665792 REVERSE
BnaC03g03440D	-1.87417	19.5	tetrapyrrole synthesis.porphobilinogen deaminase	Symbols: HEMC | HEMC (HYDROXYMETHYLBILANE SYNTHASE); hydroxymethylbilane synthase | chr5:2663499-2665792 REVERSE
BnaC09g47630D	-1.19303	19.5	tetrapyrrole synthesis.porphobilinogen deaminase	Symbols: HEMC | HEMC (HYDROXYMETHYLBILANE SYNTHASE); hydroxymethylbilane synthase | chr5:2663499-2665792 REVERSE
BnaA09g40440D	-1.93012	19.6	tetrapyrrole synthesis.uroporphyrinogen III synthase	Symbols: HEMD | HEMD; uroporphyrinogen-III synthase | chr2:11287365-11290360 REVERSE
BnaC04g47210D	-1.55455	19.7	tetrapyrrole synthesis.uroporphyrinogen decarboxylase	Symbols: HEME2 | HEME2; uroporphyrinogen decarboxylase | chr2:16912845-16915177 FORWARD
BnaC05g38600D	-2.16232	19.7	tetrapyrrole synthesis.uroporphyrinogen decarboxylase	Symbols: HEME1 | HEME1; uroporphyrinogen decarboxylase | chr3:5020570-5022959 FORWARD
BnaA04g23300D	-1.16761	19.7	tetrapyrrole synthesis.uroporphyrinogen decarboxylase	Symbols: HEME2 | HEME2; uroporphyrinogen decarboxylase | chr2:16912845-16915177 FORWARD
BnaA09g06520D	-2.06935	19.8	tetrapyrrole synthesis.coproporphyrinogen III oxidase	coproporphyrinogen oxidase-related | chr5:25369245-25370921 REVERSE
BnaA09g50920D	-3.09469	19.8	tetrapyrrole synthesis.coproporphyrinogen III oxidase	Symbols: LIN2, HEMF1, ATCPO-I | LIN2 (LESION INITIATION 2); coproporphyrinogen oxidase | chr1:869051-871211 REVERSE
BnaC08g45590D	-3.26244	19.8	tetrapyrrole synthesis.coproporphyrinogen III oxidase	Symbols: LIN2, HEMF1, ATCPO-I | LIN2 (LESION INITIATION 2); coproporphyrinogen oxidase | chr1:869051-871211 REVERSE
BnaCnng15780D	-1.79458	19.8	tetrapyrrole synthesis.coproporphyrinogen III oxidase	coproporphyrinogen oxidase-related | chr5:25369245-25370921 REVERSE
BnaA10g19460D	-1.70587	19.9	tetrapyrrole synthesis.protoporphyrin IX oxidase	Symbols: HEMG2, MEE61, PPO2 | HEMG2; electron carrier/ oxidoreductase/ protoporphyrinogen oxidase | chr5:4583269-4587427 REVERSE
BnaC09g54390D	-1.62863	19.9	tetrapyrrole synthesis.protoporphyrin IX oxidase	Symbols: HEMG2, MEE61, PPO2 | HEMG2; electron carrier/ oxidoreductase/ protoporphyrinogen oxidase | chr5:4583269-4587427 REVERSE
BnaC05g31170D	-1.69681	19.99	tetrapyrrole synthesis.unspecified	flavodoxin family protein | chr3:453421-457841 FORWARD
BnaAnng28520D	2.41934	19.99	tetrapyrrole synthesis.unspecified	Symbols: ATCLH2, CLH2 | ATCLH2; chlorophyllase | chr5:17630450-17632312 FORWARD
BnaCnng19750D	2.24914	19.99	tetrapyrrole synthesis.unspecified	Symbols: ATCLH2, CLH2 | ATCLH2; chlorophyllase | chr5:17630450-17632312 FORWARD
BnaC02g30620D	2.70539	19.99	tetrapyrrole synthesis.unspecified	Symbols: ATCLH2, CLH2 | ATCLH2; chlorophyllase | chr5:17630450-17632312 FORWARD
BnaA09g16640D	1.33611	19.99	tetrapyrrole synthesis.unspecified	Symbols: ATCLH2, CLH2 | ATCLH2; chlorophyllase | chr5:17630450-17632312 FORWARD
BnaA02g21330D	-1.84373	20	stress	stress-inducible protein, putative | chr4:7338659-7341361 REVERSE
BnaA09g55900D	-1.84538	20	stress	Symbols: SEP2 | SEP2 (STRESS ENHANCED PROTEIN 2); chlorophyll binding | chr2:9356983-9357916 REVERSE
BnaC08g35470D	-1.54408	20	stress	Symbols: SEP2 | SEP2 (STRESS ENHANCED PROTEIN 2); chlorophyll binding | chr2:9356983-9357916 REVERSE
BnaA09g12780D	1.32513	20	stress	stress-inducible protein, putative | chr1:23230956-23233543 FORWARD
BnaC09g13120D	1.26729	20	stress	stress-inducible protein, putative | chr1:23230956-23233543 FORWARD
BnaA01g03580D	-2.19388	20.1	stress.biotic	Symbols: ADR1-L1 | ADR1-L1 (ADR1-like 1); ATP binding / protein binding | chr4:16051051-16056526 REVERSE
BnaA01g19200D	-2.63088	20.1	stress.biotic	Symbols: AtRLP48 | AtRLP48 (Receptor Like Protein 48); protein binding | chr4:8025804-8028614 FORWARD
BnaA01g31190D	-4.30378	20.1	stress.biotic	Symbols: AtRLP43 | AtRLP43 (Receptor Like Protein 43); kinase/ protein binding | chr3:10895977-10898841 REVERSE
BnaA01g31220D	-5.56869	20.1	stress.biotic	Symbols: AtRLP43 | AtRLP43 (Receptor Like Protein 43); kinase/ protein binding | chr3:10895977-10898841 REVERSE
BnaA01g31270D	-6.78821	20.1	stress.biotic	Symbols: AtRLP43 | AtRLP43 (Receptor Like Protein 43); kinase/ protein binding | chr3:10895977-10898841 REVERSE
BnaA02g17100D	-3.11711	20.1	stress.biotic	Symbols: ATLP-3 | ATLP-3 | chr1:28174378-28175383 FORWARD
BnaA02g17480D	-1.5838	20.1	stress.biotic	pathogenesis-related thaumatin family protein | chr1:28458782-28460854 FORWARD
BnaA02g25170D	-2.55965	20.1	stress.biotic	ATP binding / GTP binding / nucleoside-triphosphatase/ nucleotide binding | chr5:19189411-19192516 FORWARD
BnaA02g26210D	-1.26133	20.1	stress.biotic	Symbols: PDF2.3, LCR68 | LCR68 (LOW-MOLECULAR-WEIGHT CYSTEINE-RICH 68); peptidase inhibitor | chr2:539999-540634 FORWARD
BnaA02g32580D	-1.79849	20.1	stress.biotic	Symbols: CW9 | CW9; ATP binding | chr1:21902284-21905685 FORWARD
BnaA02g32670D	-1.98682	20.1	stress.biotic	Symbols: CW9 | CW9; ATP binding | chr1:21902284-21905685 FORWARD
BnaA03g20300D	-3.52356	20.1	stress.biotic	chitinase, putative | chr2:18078649-18080028 REVERSE
BnaA03g41780D	-1.20057	20.1	stress.biotic	Symbols: PAD4, ATPAD4 | PAD4 (PHYTOALEXIN DEFICIENT 4); lipase/ protein binding / triacylglycerol lipase | chr3:19431371-19434403 FORWARD
BnaA03g43880D	-1.89441	20.1	stress.biotic	Symbols: EDR2 | EDR2; lipid binding | chr4:10431520-10437425 REVERSE
BnaA04g05420D	-3.36818	20.1	stress.biotic	Symbols: PAD4, ATPAD4 | PAD4 (PHYTOALEXIN DEFICIENT 4); lipase/ protein binding / triacylglycerol lipase | chr3:19431371-19434403 FORWARD
BnaA04g05430D	-3.49713	20.1	stress.biotic	Symbols: PAD4, ATPAD4 | PAD4 (PHYTOALEXIN DEFICIENT 4); lipase/ protein binding / triacylglycerol lipase | chr3:19431371-19434403 FORWARD
BnaA04g09570D	-2.11644	20.1	stress.biotic	Symbols: AIG2L | AIG2L (AVIRULENCE INDUCED GENE 2 LIKE PROTEIN) | chr5:15899646-15900653 FORWARD
BnaA04g25220D	-2.72535	20.1	stress.biotic	chitinase, putative | chr2:18081331-18082767 REVERSE
BnaA05g10570D	-4.51457	20.1	stress.biotic	Symbols: AtRLP26 | AtRLP26 (Receptor Like Protein 26); kinase/ protein binding | chr2:14021870-14024398 FORWARD
BnaA05g32660D	-1.63291	20.1	stress.biotic	Symbols: CHAT | CHAT (acetyl CoA:(Z)-3-hexen-1-ol acetyltransferase); acetyl CoA:(Z)-3-hexen-1-ol acetyltransferase | chr3:828296-829896 REVERSE
BnaA06g12390D	-2.73552	20.1	stress.biotic	Symbols: ATLP-1 | ATLP-1 | chr1:6276788-6278150 REVERSE
BnaA06g29870D	-1.20576	20.1	stress.biotic	Symbols: RPP8, HRT, RCY1 | RPP8 (RECOGNITION OF PERONOSPORA PARASITICA 8); nucleotide binding | chr5:17462611-17467448 REVERSE
BnaA06g39650D	-1.13444	20.1	stress.biotic	Symbols: RPP8, HRT, RCY1 | RPP8 (RECOGNITION OF PERONOSPORA PARASITICA 8); nucleotide binding | chr5:17462611-17467448 REVERSE
BnaA07g34370D	-2.118	20.1	stress.biotic	pathogenesis-related family protein | chr1:29621340-29622447 REVERSE
BnaA08g11840D	-1.5006	20.1	stress.biotic	Symbols: ADR1-L1 | ADR1-L1 (ADR1-like 1); ATP binding / protein binding | chr4:16051051-16056526 REVERSE
BnaA08g13270D	-1.25465	20.1	stress.biotic	Symbols: PRHA | PRHA (PATHOGENESIS RELATED HOMEODOMAIN PROTEIN A); protein binding / sequence-specific DNA binding / transcription activator/ transcription factor | chr4:14648139-14653379 REVERSE
BnaA08g23230D	-3.70044	20.1	stress.biotic	Symbols: AtRLP3 | AtRLP3 (Receptor Like Protein 3); protein binding / protein kinase | chr1:5901169-5903439 REVERSE
BnaA08g24820D	-1.58141	20.1	stress.biotic	Symbols: RPS5 | RPS5 (RESISTANT TO P. SYRINGAE 5); nucleotide binding | chr1:4144935-4147817 FORWARD
BnaA08g26400D	-2.33197	20.1	stress.biotic	ATP binding / GTP binding / nucleoside-triphosphatase/ nucleotide binding | chr5:19189411-19192516 FORWARD
BnaA09g09270D	-3.82224	20.1	stress.biotic	Symbols: AtRLP6 | AtRLP6 (Receptor Like Protein 6); protein binding | chr1:17183550-17186534 REVERSE
BnaA09g15440D	-1.95243	20.1	stress.biotic	chitinase, putative | chr2:18081331-18082767 REVERSE
BnaA09g35430D	-3.56224	20.1	stress.biotic	Symbols: AtRLP48 | AtRLP48 (Receptor Like Protein 48); protein binding | chr4:8025804-8028614 FORWARD
BnaA09g46480D	-3.07072	20.1	stress.biotic	Symbols: RFL1 | RFL1 (RPS5-like 1); ATP binding / protein binding | chr1:4140948-4143605 FORWARD
BnaA09g46490D	-3.60688	20.1	stress.biotic	Symbols: RFL1 | RFL1 (RPS5-like 1); ATP binding / protein binding | chr1:4140948-4143605 FORWARD
BnaA10g05680D	-7.16342	20.1	stress.biotic	chitinase, putative | chr2:18081331-18082767 REVERSE
BnaAnng06950D	-1.64636	20.1	stress.biotic	protein kinase family protein | chr5:24752868-24756718 FORWARD
BnaAnng18020D	-2.32741	20.1	stress.biotic	pathogenesis-related thaumatin family protein | chr4:18069601-18071355 REVERSE
BnaAnng30660D	-1.37814	20.1	stress.biotic	harpin-induced family protein / HIN1 family protein / harpin-responsive family protein | chr3:15928160-15929758 FORWARD
BnaAnng41250D	-3.7577	20.1	stress.biotic	thaumatin, putative | chr4:18066177-18068205 REVERSE
BnaC01g04860D	-2.06166	20.1	stress.biotic	Symbols: ADR1-L1 | ADR1-L1 (ADR1-like 1); ATP binding / protein binding | chr4:16051051-16056526 REVERSE
BnaC01g08430D	-1.81479	20.1	stress.biotic	Symbols: PRHA | PRHA (PATHOGENESIS RELATED HOMEODOMAIN PROTEIN A); protein binding / sequence-specific DNA binding / transcription activator/ transcription factor | chr4:14648139-14653379 REVERSE
BnaC01g34430D	-1.16487	20.1	stress.biotic	Symbols: MOS4 | MOS4 (Modifier of snc1,4) | chr3:6223188-6225372 FORWARD
BnaC02g07560D	-1.48335	20.1	stress.biotic	Symbols: CSA1 | CSA1 (constitutive shade-avoidance1); ATP binding / transmembrane receptor | chr5:5908874-5913099 REVERSE
BnaC02g07600D	-2.02399	20.1	stress.biotic	Symbols: DAR4 | DAR4 (DA1-RELATED PROTEIN 4); ATP binding / protein binding / zinc ion binding | chr5:5916970-5923355 FORWARD
BnaC02g23440D	-2.5414	20.1	stress.biotic	pathogenesis-related thaumatin family protein | chr1:28458782-28460854 FORWARD
BnaC03g08330D	-1.53132	20.1	stress.biotic	Symbols: AtRLP21 | AtRLP21 (Receptor Like Protein 21); protein binding | chr2:10838420-10841881 FORWARD
BnaC03g08490D	-4.68806	20.1	stress.biotic	transferase family protein | chr5:5781987-5783706 REVERSE
BnaC03g08650D	-1.75406	20.1	stress.biotic	Symbols: CSA1 | CSA1 (constitutive shade-avoidance1); ATP binding / transmembrane receptor | chr5:5908874-5913099 REVERSE
BnaC03g33880D	-1.42805	20.1	stress.biotic	Symbols: PR4, HEL, PR-4 | PR4 (PATHOGENESIS-RELATED 4); chitin binding | chr3:1285524-1286562 REVERSE
BnaC03g45470D	-4.00182	20.1	stress.biotic	Symbols: PR1, PR 1, ATPR1 | PR1 (PATHOGENESIS-RELATED GENE 1) | chr2:6241704-6242463 REVERSE
BnaC03g60120D	-2.76939	20.1	stress.biotic	thaumatin, putative | chr4:18066177-18068205 REVERSE
BnaC03g63440D	-8.69116	20.1	stress.biotic	glycosyl hydrolase family 18 protein | chr4:10763934-10765753 REVERSE
BnaC03g70520D	-2.71989	20.1	stress.biotic	pathogenesis-related family protein | chr1:29621340-29622447 REVERSE
BnaC04g09720D	-8.6677	20.1	stress.biotic	chitinase, putative | chr2:18081331-18082767 REVERSE
BnaC04g11650D	-3.34395	20.1	stress.biotic	Symbols: AtRLP26 | AtRLP26 (Receptor Like Protein 26); kinase/ protein binding | chr2:14021870-14024398 FORWARD
BnaC05g13990D	-1.98001	20.1	stress.biotic	Symbols: ATLP-1 | ATLP-1 | chr1:6276788-6278150 REVERSE
BnaC05g32870D	-1.97461	20.1	stress.biotic	Symbols: MOS4 | MOS4 (Modifier of snc1,4) | chr3:6223188-6225372 FORWARD
BnaC05g47740D	-1.30635	20.1	stress.biotic	Symbols: CHAT | CHAT (acetyl CoA:(Z)-3-hexen-1-ol acetyltransferase); acetyl CoA:(Z)-3-hexen-1-ol acetyltransferase | chr3:828296-829896 REVERSE
BnaC05g47750D	-2.96374	20.1	stress.biotic	Symbols: CHAT | CHAT (acetyl CoA:(Z)-3-hexen-1-ol acetyltransferase); acetyl CoA:(Z)-3-hexen-1-ol acetyltransferase | chr3:828296-829896 REVERSE
BnaC06g07830D	-1.45575	20.1	stress.biotic	avirulence-responsive protein, putative / avirulence induced gene protein, putative / AIG protein, putative | chr1:12349463-12351203 REVERSE
BnaC06g39200D	-2.09813	20.1	stress.biotic	pathogenesis-related family protein | chr1:29621340-29622447 REVERSE
BnaC06g40790D	-2.88055	20.1	stress.biotic	Symbols: RPS5 | RPS5 (RESISTANT TO P. SYRINGAE 5); nucleotide binding | chr1:4144935-4147817 FORWARD
BnaC06g41400D	-7.56986	20.1	stress.biotic	Symbols: RPS5 | RPS5 (RESISTANT TO P. SYRINGAE 5); nucleotide binding | chr1:4144935-4147817 FORWARD
BnaC08g17270D	-7.80305	20.1	stress.biotic	Symbols: AtRLP3 | AtRLP3 (Receptor Like Protein 3); protein binding / protein kinase | chr1:5901169-5903439 REVERSE
BnaC08g20430D	-2.234	20.1	stress.biotic	transferase family protein | chr3:18046323-18049463 FORWARD
BnaC08g23660D	-1.12066	20.1	stress.biotic	Symbols: PAD4, ATPAD4 | PAD4 (PHYTOALEXIN DEFICIENT 4); lipase/ protein binding / triacylglycerol lipase | chr3:19431371-19434403 FORWARD
BnaC08g25190D	-8.58246	20.1	stress.biotic	Symbols: ATEP3, ATCHITIV, CHIV | ATEP3; chitinase | chr3:20145910-20147063 FORWARD
BnaC08g26810D	-1.4358	20.1	stress.biotic	Symbols: AtRLP48 | AtRLP48 (Receptor Like Protein 48); protein binding | chr4:8025804-8028614 FORWARD
BnaC08g40550D	-2.98636	20.1	stress.biotic	Symbols: RFL1 | RFL1 (RPS5-like 1); ATP binding / protein binding | chr1:4140948-4143605 FORWARD
BnaCnng12090D	-2.38835	20.1	stress.biotic	lipase class 3 family protein / disease resistance protein-related | chr3:17752938-17755190 REVERSE
BnaCnng17400D	-10.4683	20.1	stress.biotic	pathogenesis-related protein, putative | chr4:13121068-13121955 FORWARD
BnaCnng23350D	-2.94989	20.1	stress.biotic	pathogenesis-related thaumatin family protein | chr4:18069601-18071355 REVERSE
BnaCnng43870D	-1.36659	20.1	stress.biotic	Symbols: ATDAD1 | ATDAD1 (DEFENDER AGAINST APOPTOTIC DEATH 1) | chr1:11605857-11607768 REVERSE
BnaCnng54590D	-1.25339	20.1	stress.biotic	Symbols: PAD4, ATPAD4 | PAD4 (PHYTOALEXIN DEFICIENT 4); lipase/ protein binding / triacylglycerol lipase | chr3:19431371-19434403 FORWARD
BnaCnng60400D	-1.92971	20.1	stress.biotic	protein kinase family protein | chr5:24752868-24756718 FORWARD
BnaCnng60470D	-8.97537	20.1	stress.biotic	avirulence-responsive family protein / avirulence induced gene (AIG1) family protein | chr1:12333046-12339182 REVERSE
BnaCnng63440D	-1.38053	20.1	stress.biotic	Symbols: ADR1-L1 | ADR1-L1 (ADR1-like 1); ATP binding / protein binding | chr4:16051051-16056526 REVERSE
BnaC03g62180D	1.99769	20.1	stress.biotic	Symbols: BTI1 | BTI1 (VIRB2-INTERACTING PROTEIN 1) | chr4:12317059-12319937 FORWARD
BnaA08g15040D	3.16762	20.1	stress.biotic	Symbols: BTI1 | BTI1 (VIRB2-INTERACTING PROTEIN 1) | chr4:12317059-12319937 FORWARD
BnaC07g43230D	1.77626	20.1	stress.biotic	avirulence-responsive protein-related / avirulence induced gene (AIG) protein-related | chr4:15191325-15192596 FORWARD
BnaC01g25570D	1.91113	20.1	stress.biotic	lipase class 3 family protein / disease resistance protein-related | chr3:17752938-17755190 REVERSE
BnaA06g34320D	2.86328	20.1	stress.biotic	Symbols: LCR69, PDF2.2 | LCR69 (LOW-MOLECULAR-WEIGHT CYSTEINE-RICH 69); peptidase inhibitor | chr2:528350-529108 FORWARD
BnaAnng07130D	1.06329	20.1	stress.biotic	Symbols: ATBI-1, BI-1, ATBI1 | ATBI1 (BAX INHIBITOR 1) | chr5:19136023-19137942 FORWARD
BnaC01g28360D	1.72106	20.1	stress.biotic	Symbols: CW9 | CW9; ATP binding | chr1:21902284-21905685 FORWARD
BnaC09g20030D	1.23857	20.1	stress.biotic	Symbols: ATBI-1, BI-1, ATBI1 | ATBI1 (BAX INHIBITOR 1) | chr5:19136023-19137942 FORWARD
BnaC02g17410D	2.72457	20.1	stress.biotic	thionin, putative | chr1:24605671-24606537 REVERSE
BnaUnng00890D	2.72457	20.1	stress.biotic	thionin, putative | chr1:24605671-24606537 REVERSE
BnaA03g46130D	2.48064	20.1	stress.biotic	Symbols: BTI1 | BTI1 (VIRB2-INTERACTING PROTEIN 1) | chr4:12317059-12319937 FORWARD
BnaA04g09560D	1.71566	20.1	stress.biotic	Symbols: AIG2L | AIG2L (AVIRULENCE INDUCED GENE 2 LIKE PROTEIN) | chr5:15899646-15900653 FORWARD
BnaA01g19180D	1.43494	20.1	stress.biotic	Symbols: AtRLP48 | AtRLP48 (Receptor Like Protein 48); protein binding | chr4:8025804-8028614 FORWARD
BnaC09g41970D	1.9632	20.1	stress.biotic	glycosyl hydrolase family 81 protein | chr5:5182641-5184878 REVERSE
BnaA01g19190D	2.89077	20.1	stress.biotic	Symbols: AtRLP48 | AtRLP48 (Receptor Like Protein 48); protein binding | chr4:8025804-8028614 FORWARD
BnaA08g14830D	1.14184	20.1	stress.biotic	pathogenesis-related thaumatin family protein | chr4:17039192-17041141 REVERSE
BnaC01g02610D	5.20555	20.1	stress.biotic	pathogenesis-related thaumatin family protein | chr4:17039192-17041141 REVERSE
BnaC03g76850D	1.10277	20.1	stress.biotic	pathogenesis-related thaumatin family protein | chr4:17039192-17041141 REVERSE
BnaC03g24360D	6.5056	20.1	stress.biotic	chitinase, putative | chr2:18093770-18095025 REVERSE
BnaA03g20340D	6.40834	20.1	stress.biotic	chitinase, putative | chr2:18093770-18095025 REVERSE
BnaA01g01570D	6.43794	20.1	stress.biotic	pathogenesis-related thaumatin family protein | chr4:17039192-17041141 REVERSE
BnaA05g03430D	4.19476	20.1	stress.biotic	chitinase, putative | chr2:18093770-18095025 REVERSE
BnaA01g00780D	-1.61012	20.1	stress.biotic	Symbols: ACD2, ATRCCR | ACD2 (ACCELERATED CELL DEATH 2); red chlorophyll catabolite reductase | chr4:17442612-17443855 FORWARD
BnaA01g15270D	-2.76603	20.1	stress.biotic	Symbols: RPS2 | RPS2 (RESISTANT TO P. SYRINGAE 2); protein binding | chr4:13224338-13227872 FORWARD
BnaA01g31260D	-4.37504	20.1	stress.biotic	Symbols: AtRLP43 | AtRLP43 (Receptor Like Protein 43); kinase/ protein binding | chr3:10895977-10898841 REVERSE
BnaA01g36770D	-1.58563	20.1	stress.biotic	Symbols: NDR1 | NDR1 (non race-specific disease resistance 1); signal transducer | chr3:7194846-7195736 FORWARD
BnaA02g29530D	1.49417	20.1	stress.biotic	avirulence-responsive protein, putative / avirulence induced gene (AIG) protein, putative | chr3:10968100-10969387 REVERSE
BnaA03g06640D	1.28077	20.1	stress.biotic	transferase family protein | chr5:5781987-5783706 REVERSE
BnaA03g28150D	-1.11636	20.1	stress.biotic	immediate-early fungal elicitor family protein | chr3:618409-619686 FORWARD
BnaA03g28780D	8.72565	20.1	stress.biotic	Symbols: PR4, HEL, PR-4 | PR4 (PATHOGENESIS-RELATED 4); chitin binding | chr3:1285524-1286562 REVERSE
BnaA03g35850D	-2.27572	20.1	stress.biotic	Symbols: NDR1 | NDR1 (non race-specific disease resistance 1); signal transducer | chr3:7194846-7195736 FORWARD
BnaA03g40330D	-1.21232	20.1	stress.biotic	protein kinase family protein | chr5:24752868-24756718 FORWARD
BnaA03g56320D	-1.89308	20.1	stress.biotic	Symbols: AtRLP26 | AtRLP26 (Receptor Like Protein 26); kinase/ protein binding | chr2:14021870-14024398 FORWARD
BnaA04g14340D	-1.08235	20.1	stress.biotic	FUNCTIONS IN: molecular_function unknown; INVOLVED IN: biological_process unknown; LOCATED IN: endomembrane system; EXPRESSED IN: 11 plant structures; EXPRESSED DURING: 7 growth stages; CONTAINS InterPro DOMAIN/s: Butirosin biosynthesis, BtrG-like (InterPro:IPR013024), AIG2-like (InterPro:IPR009288); BEST Arabidopsis thaliana protein match is: avirulence-responsive protein-related / avirulence in…
BnaA05g03420D	1.4282	20.1	stress.biotic	chitinase, putative | chr2:18076224-18077463 REVERSE
BnaA05g04060D	-1.87811	20.1	stress.biotic	Symbols: PEN2, BGLU26 | PEN2 (PENETRATION 2); hydrolase, hydrolyzing O-glycosyl compounds / thioglucosidase | chr2:18364756-18367725 FORWARD
BnaA05g07580D	1.98799	20.1	stress.biotic	Symbols: DOGT1, UGT73C5 | DOGT1 (DON-GLUCOSYLTRANSFERASE 1); UDP-glycosyltransferase/ cis-zeatin O-beta-D-glucosyltransferase/ glucosyltransferase/ quercetin 4'-O-glucosyltransferase/ quercetin 7-O-glucosyltransferase/ trans-zeatin O-beta-D-glucosyltransferase/ transferase, transf | chr2:15423380-15425016 REVERSE
BnaA05g27420D	1.66385	20.1	stress.biotic	Symbols: NHL1 | NHL1 | chr3:3678835-3679943 REVERSE
BnaA05g33290D	-7.22882	20.1	stress.biotic	immediate-early fungal elicitor family protein | chr3:618409-619686 FORWARD
BnaA06g08260D	-4.1375	20.1	stress.biotic	Symbols: RFL1 | RFL1 (RPS5-like 1); ATP binding / protein binding | chr1:4140948-4143605 FORWARD
BnaA07g11270D	-1.24631	20.1	stress.biotic	Symbols: PUB44, ATPUB44, SAUL1 | SAUL1 (SENESCENCE-ASSOCIATED E3 UBIQUITIN LIGASE 1); ubiquitin-protein ligase | chr1:7217128-7220784 FORWARD
BnaA08g24860D	-1.18324	20.1	stress.biotic	Symbols: RPS5 | RPS5 (RESISTANT TO P. SYRINGAE 5); nucleotide binding | chr1:4144935-4147817 FORWARD
BnaA09g14420D	-1.44057	20.1	stress.biotic	Symbols: CW9 | CW9; ATP binding | chr1:21902284-21905685 FORWARD
BnaA09g15430D	-1.23417	20.1	stress.biotic	chitinase, putative | chr2:18081331-18082767 REVERSE
BnaA09g34290D	-1.22585	20.1	stress.biotic	Symbols: ATEP3, ATCHITIV, CHIV | ATEP3; chitinase | chr3:20145910-20147063 FORWARD
BnaA09g50460D	-1.57009	20.1	stress.biotic	Symbols: AtRLP43 | AtRLP43 (Receptor Like Protein 43); kinase/ protein binding | chr3:10895977-10898841 REVERSE
BnaA09g53450D	-7.26053	20.1	stress.biotic	binding / ubiquitin-protein ligase | chr5:16927910-16930472 REVERSE
BnaAnng22260D	3.75336	20.1	stress.biotic	Symbols: THH1 | THH1 (TOM THREE HOMOLOG 1); virion binding | chr1:4970858-4973726 REVERSE
BnaAnng39130D	-1.63776	20.1	stress.biotic	avirulence-responsive family protein / avirulence induced gene (AIG1) family protein | chr4:6234762-6236312 FORWARD
BnaC01g04870D	-3.73215	20.1	stress.biotic	Symbols: ADR1-L1 | ADR1-L1 (ADR1-like 1); ATP binding / protein binding | chr4:16051051-16056526 REVERSE
BnaC01g18040D	-1.89451	20.1	stress.biotic	Symbols: RPS2 | RPS2 (RESISTANT TO P. SYRINGAE 2); protein binding | chr4:13224338-13227872 FORWARD
BnaC01g41020D	-1.81695	20.1	stress.biotic	glycosyl hydrolase family 18 protein | chr4:10763934-10765753 REVERSE
BnaC02g18230D	-2.52774	20.1	stress.biotic	ATP binding / GTP binding / nucleoside-triphosphatase/ nucleotide binding | chr5:19189411-19192516 FORWARD
BnaC03g02540D	-1.64172	20.1	stress.biotic	Symbols: NHL3 | NHL3 | chr5:1930793-1931768 REVERSE
BnaC03g21710D	-1.95858	20.1	stress.biotic	protease inhibitor, putative | chr2:16236381-16237280 REVERSE
BnaC03g24270D	-1.83078	20.1	stress.biotic	chitinase, putative | chr2:18076224-18077463 REVERSE
BnaC03g33180D	-1.24152	20.1	stress.biotic	immediate-early fungal elicitor family protein | chr3:618409-619686 FORWARD
BnaC03g37070D	-1.88511	20.1	stress.biotic	thionin, putative | chr1:24605671-24606537 REVERSE
BnaC03g37570D	-1.71574	20.1	stress.biotic	Symbols: ATHCHIB, PR3, PR-3, CHI-B, B-CHI | ATHCHIB (ARABIDOPSIS THALIANA BASIC CHITINASE); chitinase | chr3:3962382-3963964 REVERSE
BnaC03g41690D	-1.8818	20.1	stress.biotic	Symbols: NDR1 | NDR1 (non race-specific disease resistance 1); signal transducer | chr3:7194846-7195736 FORWARD
BnaC03g44590D	-1.99366	20.1	stress.biotic	Symbols: CSA1 | CSA1 (constitutive shade-avoidance1); ATP binding / transmembrane receptor | chr5:5908874-5913099 REVERSE
BnaC04g03780D	-2.59365	20.1	stress.biotic	Symbols: PEN2, BGLU26 | PEN2 (PENETRATION 2); hydrolase, hydrolyzing O-glycosyl compounds / thioglucosidase | chr2:18364756-18367725 FORWARD
BnaC04g08440D	2.55423	20.1	stress.biotic	Symbols: DOGT1, UGT73C5 | DOGT1 (DON-GLUCOSYLTRANSFERASE 1); UDP-glycosyltransferase/ cis-zeatin O-beta-D-glucosyltransferase/ glucosyltransferase/ quercetin 4'-O-glucosyltransferase/ quercetin 7-O-glucosyltransferase/ trans-zeatin O-beta-D-glucosyltransferase/ transferase, transf | chr2:15423380-15425016 REVERSE
BnaC04g55840D	-1.22398	20.1	stress.biotic	Symbols: AIG2L | AIG2L (AVIRULENCE INDUCED GENE 2 LIKE PROTEIN) | chr5:15899646-15900653 FORWARD
BnaC05g01140D	-2.65885	20.1	stress.biotic	chitinase, putative | chr1:471990-473160 REVERSE
BnaC05g09570D	-2.55639	20.1	stress.biotic	Symbols: RPS5 | RPS5 (RESISTANT TO P. SYRINGAE 5); nucleotide binding | chr1:4144935-4147817 FORWARD
BnaC05g13420D	-2.30378	20.1	stress.biotic	Symbols: AtRLP2 | AtRLP2 (Receptor Like Protein 2); protein binding / protein kinase | chr1:5896416-5898717 REVERSE
BnaC05g41570D	1.57454	20.1	stress.biotic	Symbols: NHL1 | NHL1 | chr3:3678835-3679943 REVERSE
BnaC05g49650D	1.58794	20.1	stress.biotic	Symbols: THH1 | THH1 (TOM THREE HOMOLOG 1); virion binding | chr1:4970858-4973726 REVERSE
BnaC06g12110D	-1.74272	20.1	stress.biotic	Symbols: NHL25 | NHL25 (NDR1/HIN1-LIKE 25) | chr5:14604367-14605194 REVERSE
BnaC07g15170D	-1.02179	20.1	stress.biotic	Symbols: PUB44, ATPUB44, SAUL1 | SAUL1 (SENESCENCE-ASSOCIATED E3 UBIQUITIN LIGASE 1); ubiquitin-protein ligase | chr1:7217128-7220784 FORWARD
BnaC07g21510D	1.87691	20.1	stress.biotic	Symbols: LCR69, PDF2.2 | LCR69 (LOW-MOLECULAR-WEIGHT CYSTEINE-RICH 69); peptidase inhibitor | chr2:528350-529108 FORWARD
BnaC07g35680D	-1.49742	20.1	stress.biotic	Symbols: EDR2 | EDR2; lipid binding | chr4:10431520-10437425 REVERSE
BnaC08g01540D	-1.17304	20.1	stress.biotic	Symbols: POM1, ERH2, ELP1, CTL1, ELP, HOT2, ATCTL1 | POM1 (POM-POM1); chitinase | chr1:1766503-1768695 REVERSE
BnaC08g03660D	-10.2328	20.1	stress.biotic	Symbols: PR1, PR 1, ATPR1 | PR1 (PATHOGENESIS-RELATED GENE 1) | chr2:6241704-6242463 REVERSE
BnaC08g15410D	-10.0177	20.1	stress.biotic	Symbols: RPS5 | RPS5 (RESISTANT TO P. SYRINGAE 5); nucleotide binding | chr1:4144935-4147817 FORWARD
BnaC08g15420D	-6.54689	20.1	stress.biotic	Symbols: RPS5 | RPS5 (RESISTANT TO P. SYRINGAE 5); nucleotide binding | chr1:4144935-4147817 FORWARD
BnaC09g02130D	-1.32614	20.1	stress.biotic	Symbols: CW9 | CW9; ATP binding | chr1:21902284-21905685 FORWARD
BnaC09g51720D	-1.02794	20.1	stress.biotic	chitinase, putative | chr2:18081331-18082767 REVERSE
BnaCnng00040D	-2.56953	20.1	stress.biotic	Symbols: RIN4 | RIN4 (RPM1 INTERACTING PROTEIN 4); protein binding | chr3:9132310-9134030 FORWARD
BnaCnng10770D	-2.82987	20.1	stress.biotic	Symbols: NDR1 | NDR1 (non race-specific disease resistance 1); signal transducer | chr3:7194846-7195736 FORWARD
BnaCnng24710D	2.25187	20.1	stress.biotic	Symbols: DOGT1, UGT73C5 | DOGT1 (DON-GLUCOSYLTRANSFERASE 1); UDP-glycosyltransferase/ cis-zeatin O-beta-D-glucosyltransferase/ glucosyltransferase/ quercetin 4'-O-glucosyltransferase/ quercetin 7-O-glucosyltransferase/ trans-zeatin O-beta-D-glucosyltransferase/ transferase, transf | chr2:15423380-15425016 REVERSE
BnaCnng39650D	-3.65821	20.1	stress.biotic	chitinase, putative | chr2:18081331-18082767 REVERSE
BnaA04g14490D	-3.02148	20.2	stress.abiotic	unknown protein | chr2:10427856-10429222 REVERSE
BnaAnng27980D	-5.43163	20.2	stress.abiotic	unknown protein | chr2:10427856-10429222 REVERSE
BnaC01g41460D	-1.46446	20.2	stress.abiotic	Symbols: ATOSM34 | ATOSM34 (osmotin 34) | chr4:7024856-7026146 REVERSE
BnaC02g45010D	-1.42899	20.2	stress.abiotic	Symbols: ATBAG1 | ATBAG1 (ARABIDOPSIS THALIANA BCL-2-ASSOCIATED ATHANOGENE 1); protein binding | chr5:21152214-21154244 REVERSE
BnaC04g40020D	-3.99498	20.2	stress.abiotic	osmotin-like protein, putative | chr2:12354430-12355431 REVERSE
BnaC08g33910D	-5.50158	20.2	stress.abiotic	unknown protein | chr2:10427856-10429222 REVERSE
BnaA06g23870D	1.8972	20.2	stress.abiotic	Symbols: ATATH13, ATH13, ATOSA1, OSA1 | ATATH13; transporter | chr5:25948973-25953822 FORWARD
BnaC09g48390D	1.48172	20.2	stress.abiotic	Symbols: ATBAG3 | ATBAG3 (ARABIDOPSIS THALIANA BCL-2-ASSOCIATED ATHANOGENE 3); protein binding | chr5:2265256-2266967 REVERSE
BnaA03g12820D	1.56342	20.2	stress.abiotic	Symbols: ATBAG1 | ATBAG1 (ARABIDOPSIS THALIANA BCL-2-ASSOCIATED ATHANOGENE 1); protein binding | chr5:21152214-21154244 REVERSE
BnaA06g20710D	1.34934	20.2	stress.abiotic	apolipoprotein D-related | chr3:17656670-17658316 REVERSE
BnaCnng57590D	1.45514	20.2	stress.abiotic	Symbols: ATBAG1 | ATBAG1 (ARABIDOPSIS THALIANA BCL-2-ASSOCIATED ATHANOGENE 1); protein binding | chr5:21152214-21154244 REVERSE
BnaA02g04730D	4.42206	20.2	stress.abiotic	Symbols: ATSPX1, SPX1 | SPX1 (SPX DOMAIN GENE 1) | chr5:6802372-6803625 FORWARD
BnaA01g05660D	-1.16494	20.2	stress.abiotic	Symbols: GGT1 | GGT1 (GAMMA-GLUTAMYL TRANSPEPTIDASE 1); gamma-glutamyltransferase/ glutathione gamma-glutamylcysteinyltransferase | chr4:18399955-18402963 FORWARD
BnaA01g12890D	-1.36782	20.2	stress.abiotic	Symbols: ATOSM34 | ATOSM34 (osmotin 34) | chr4:7024856-7026146 REVERSE
BnaA08g16380D	-8.55714	20.2	stress.abiotic	Symbols: GGT1 | GGT1 (GAMMA-GLUTAMYL TRANSPEPTIDASE 1); gamma-glutamyltransferase/ glutathione gamma-glutamylcysteinyltransferase | chr4:18399955-18402963 FORWARD
BnaA10g23660D	1.20621	20.2	stress.abiotic	Symbols: ATBAG3 | ATBAG3 (ARABIDOPSIS THALIANA BCL-2-ASSOCIATED ATHANOGENE 3); protein binding | chr5:2265256-2266967 REVERSE
BnaC01g35950D	2.55223	20.2	stress.abiotic	Symbols: UVR3 | UVR3 (UV REPAIR DEFECTIVE 3); DNA (6-4) photolyase | chr3:5293306-5296592 REVERSE
BnaC03g10000D	1.45429	20.2	stress.abiotic	Symbols: ATSPX1, SPX1 | SPX1 (SPX DOMAIN GENE 1) | chr5:6802372-6803625 FORWARD
BnaC03g49360D	1.49951	20.2	stress.abiotic	Symbols: ATATH13, ATH13, ATOSA1, OSA1 | ATATH13; transporter | chr5:25948973-25953822 FORWARD
BnaC04g15370D	-3.17313	20.2	stress.abiotic	osmotin-like protein, putative | chr2:12354430-12355431 REVERSE
BnaC04g36320D	-1.79251	20.2	stress.abiotic	unknown protein | chr2:10427856-10429222 REVERSE
BnaC08g38330D	-1.03691	20.2	stress.abiotic	Per1-like family protein | chr1:5668413-5670708 FORWARD
BnaC09g00970D	-1.39247	20.2	stress.abiotic	Symbols: EDA35 | EDA35 (embryo sac development arrest 35) | chr4:2757214-2758275 FORWARD
BnaA03g31070D	-1.77223	21.1	redox.thioredoxin	Symbols: ATH9 | ATH9 (thioredoxin H-type 9) | chr3:2645195-2646497 FORWARD
BnaA03g40200D	-10.0679	21.1	redox.thioredoxin	Symbols: ACHT5 | ACHT5 (ATYPICAL CYS HIS RICH THIOREDOXIN 5) | chr5:24707500-24708893 FORWARD
BnaA03g46730D	-1.47827	21.1	redox.thioredoxin	thioredoxin family protein | chr1:2379647-2381362 FORWARD
BnaA03g55720D	-1.91266	21.1	redox.thioredoxin	Symbols: FTRA2 | FTRA2 (ferredoxin/thioredoxin reductase subunit A (variable subunit) 2); catalytic/ ferredoxin reductase/ ferredoxin:thioredoxin reductase/ lipoate synthase | chr5:2709848-2710583 REVERSE
BnaA03g57160D	-1.03134	21.1	redox.thioredoxin	Symbols: ATHM2 | ATHM2; enzyme activator | chr4:1562359-1564192 REVERSE
BnaA04g26100D	-3.43543	21.1	redox.thioredoxin	Symbols: ATTRX2, ATH2, ATTRXH2, TRXH2 | ATTRX2 (THIOREDOXIN 2); oxidoreductase, acting on sulfur group of donors, disulfide as acceptor | chr5:15990687-15991931 REVERSE
BnaA05g22350D	-1.16234	21.1	redox.thioredoxin	Symbols: HIP, ATTDX, ATHIP2 | ATTDX (TETRATICOPEPTIDE DOMAIN-CONTAINING THIOREDOXIN); oxidoreductase, acting on sulfur group of donors, disulfide as acceptor / protein binding | chr3:6123409-6126281 FORWARD
BnaA05g24170D	-1.14443	21.1	redox.thioredoxin	Symbols: ATHM4, TRX-M4, ATM4 | TRX-M4 (ARABIDOPSIS THIOREDOXIN M-TYPE 4); enzyme activator | chr3:5188374-5189697 FORWARD
BnaA07g32300D	-1.21532	21.1	redox.thioredoxin	Symbols: ATCDSP32, CDSP32 | CDSP32 (CHLOROPLASTIC DROUGHT-INDUCED STRESS PROTEIN OF 32 KD) | chr1:28547786-28549419 REVERSE
BnaA10g09070D	-1.81805	21.1	redox.thioredoxin	Symbols: Aty2 | Aty2 (Arabidopsis thioredoxin y2); electron carrier/ protein disulfide oxidoreductase | chr1:16398099-16399878 REVERSE
BnaA10g24270D	-2.5078	21.1	redox.thioredoxin	Symbols: WCRKC1 | WCRKC1 (WCRKC THIOREDOXIN 1) | chr5:2060503-2061956 REVERSE
BnaA10g25960D	-1.60972	21.1	redox.thioredoxin	Symbols: WCRKC2 | WCRKC2 (WCRKC THIOREDOXIN 2) | chr5:1178644-1180036 REVERSE
BnaAnng12670D	-3.46865	21.1	redox.thioredoxin	Symbols: TRXF1, ATF1 | TRXF1 (THIOREDOXIN F-TYPE 1); enzyme activator | chr3:588408-589685 REVERSE
BnaC01g25910D	-1.0667	21.1	redox.thioredoxin	Symbols: ATHM3, ATM3 | thioredoxin M-type 3, chloroplast (TRX-M3) | chr2:6791290-6792933 REVERSE
BnaC03g03570D	-1.29354	21.1	redox.thioredoxin	Symbols: FTRA2 | FTRA2 (ferredoxin/thioredoxin reductase subunit A (variable subunit) 2); catalytic/ ferredoxin reductase/ ferredoxin:thioredoxin reductase/ lipoate synthase | chr5:2709848-2710583 REVERSE
BnaC03g39090D	-1.95042	21.1	redox.thioredoxin	Symbols: ATHM4, TRX-M4, ATM4 | TRX-M4 (ARABIDOPSIS THIOREDOXIN M-TYPE 4); enzyme activator | chr3:5188374-5189697 FORWARD
BnaC04g56890D	-1.67423	21.1	redox.thioredoxin	Symbols: ATTRX2, ATH2, ATTRXH2, TRXH2 | ATTRX2 (THIOREDOXIN 2); oxidoreductase, acting on sulfur group of donors, disulfide as acceptor | chr5:15990687-15991931 REVERSE
BnaC05g35600D	-1.28664	21.1	redox.thioredoxin	Symbols: HIP, ATTDX, ATHIP2 | ATTDX (TETRATICOPEPTIDE DOMAIN-CONTAINING THIOREDOXIN); oxidoreductase, acting on sulfur group of donors, disulfide as acceptor / protein binding | chr3:6123409-6126281 FORWARD
BnaC06g37580D	-1.82947	21.1	redox.thioredoxin	Symbols: ATY1, TRX-Y1 | ATY1 (ARABIDOPSIS THIOREDOXIN Y1); electron carrier/ protein disulfide oxidoreductase | chr1:28811685-28813070 REVERSE
BnaC07g49920D	-9.13785	21.1	redox.thioredoxin	Symbols: ACHT5 | ACHT5 (ATYPICAL CYS HIS RICH THIOREDOXIN 5) | chr5:24707500-24708893 FORWARD
BnaC09g48890D	-3.32517	21.1	redox.thioredoxin	Symbols: WCRKC1 | WCRKC1 (WCRKC THIOREDOXIN 1) | chr5:2060503-2061956 REVERSE
BnaCnng10220D	-1.94156	21.1	redox.thioredoxin	Symbols: WCRKC2 | WCRKC2 (WCRKC THIOREDOXIN 2) | chr5:1178644-1180036 REVERSE
BnaCnng16050D	-1.72437	21.1	redox.thioredoxin	Symbols: ATHM1, TRX-M1, ATM1 | ATHM1; enzyme activator | chr1:916819-918064 REVERSE
BnaCnng27720D	-1.75382	21.1	redox.thioredoxin	Symbols: ATAPRL4 | ATAPRL4 (APR-like 4) | chr1:12748571-12750383 REVERSE
BnaA03g06900D	1.15976	21.1	redox.thioredoxin	Symbols: ATAPRL7 | ATAPRL7 (APR-like 7) | chr5:5990956-5993936 FORWARD
BnaA09g16230D	1.38078	21.1	redox.thioredoxin	Symbols: ATTRX3, ATH3, ATTRXH3, TRXH3 | ATTRX3 (THIOREDOXIN 3); oxidoreductase, acting on sulfur group of donors, disulfide as acceptor | chr5:17242607-17243912 FORWARD
BnaC09g17310D	1.53412	21.1	redox.thioredoxin	Symbols: ATTRX3, ATH3, ATTRXH3, TRXH3 | ATTRX3 (THIOREDOXIN 3); oxidoreductase, acting on sulfur group of donors, disulfide as acceptor | chr5:17242607-17243912 FORWARD
BnaA08g04320D	1.22351	21.1	redox.thioredoxin	Symbols: ATTRX5, ATH5, LIV1 | ATTRX5; oxidoreductase, acting on sulfur group of donors, disulfide as acceptor | chr1:17074942-17076330 REVERSE
BnaA09g14480D	1.80735	21.1	redox.thioredoxin	Symbols: ATH7 | ATH7 (thioredoxin H-type 7) | chr1:21952634-21953456 REVERSE
BnaA06g04960D	2.61924	21.1	redox.thioredoxin	Symbols: ACHT4 | ACHT4 (ATYPICAL CYS HIS RICH THIOREDOXIN 4); oxidoreductase, acting on sulfur group of donors, disulfide as acceptor | chr1:2712892-2714734 FORWARD
BnaC08g43100D	3.00805	21.1	redox.thioredoxin	Symbols: ACHT4 | ACHT4 (ATYPICAL CYS HIS RICH THIOREDOXIN 4); oxidoreductase, acting on sulfur group of donors, disulfide as acceptor | chr1:2712892-2714734 FORWARD
BnaA09g48840D	4.92374	21.1	redox.thioredoxin	Symbols: ACHT4 | ACHT4 (ATYPICAL CYS HIS RICH THIOREDOXIN 4); oxidoreductase, acting on sulfur group of donors, disulfide as acceptor | chr1:2712892-2714734 FORWARD
BnaA01g33890D	-1.55118	21.1	redox.thioredoxin	Symbols: ATAPRL5 | ATAPRL5 (APR-like 5) | chr3:992128-994580 FORWARD
BnaA02g32880D	-1.12813	21.1	redox.thioredoxin	Symbols: FTRA1 | FTRA1 (ferredoxin/thioredoxin reductase subunit A (variable subunit) 1); catalytic/ ferredoxin reductase/ ferredoxin:thioredoxin reductase/ lipoate synthase | chr5:7903045-7903845 REVERSE
BnaA05g30680D	-1.09535	21.1	redox.thioredoxin	thioredoxin family protein | chr3:2124217-2126142 FORWARD
BnaA10g16700D	-10.8057	21.1	redox.thioredoxin	Symbols: ATAPRL7 | ATAPRL7 (APR-like 7) | chr5:5990956-5993936 FORWARD
BnaAnng14790D	-2.25173	21.1	redox.thioredoxin	Symbols: PLP3b | PLP3b (Phosducin-like protein 3 homolog); beta-tubulin binding | chr5:26519770-26521696 FORWARD
BnaAnng18110D	-2.17544	21.1	redox.thioredoxin	thioredoxin-related | chr1:18880320-18884225 FORWARD
BnaC01g14070D	-1.2635	21.1	redox.thioredoxin	Symbols: HIP, ATTDX, ATHIP2 | ATTDX (TETRATICOPEPTIDE DOMAIN-CONTAINING THIOREDOXIN); oxidoreductase, acting on sulfur group of donors, disulfide as acceptor / protein binding | chr3:6123409-6126281 FORWARD
BnaC01g23700D	-3.27302	21.1	redox.thioredoxin	Symbols: PLP3b | PLP3b (Phosducin-like protein 3 homolog); beta-tubulin binding | chr5:26519770-26521696 FORWARD
BnaC01g40410D	2.01825	21.1	redox.thioredoxin	Symbols: ATAPRL5 | ATAPRL5 (APR-like 5) | chr3:992128-994580 FORWARD
BnaC02g06570D	-1.11285	21.1	redox.thioredoxin	Symbols: TRXF2, ATF2 | ATF2; enzyme activator | chr5:5363661-5365334 REVERSE
BnaC03g16190D	-1.7701	21.1	redox.thioredoxin	rubredoxin family protein | chr5:20744566-20745703 FORWARD
BnaC05g06220D	1.47374	21.1	redox.thioredoxin	Symbols: ACHT4 | ACHT4 (ATYPICAL CYS HIS RICH THIOREDOXIN 4); oxidoreductase, acting on sulfur group of donors, disulfide as acceptor | chr1:2712892-2714734 FORWARD
BnaC05g43860D	-2.08667	21.1	redox.thioredoxin	Symbols: ATH9 | ATH9 (thioredoxin H-type 9) | chr3:2645195-2646497 FORWARD
BnaC05g45140D	1.75679	21.1	redox.thioredoxin	thioredoxin family protein | chr3:2124217-2126142 FORWARD
BnaC06g14250D	-2.47631	21.1	redox.thioredoxin	Symbols: NTRA, ATNTRA, NTR2 | NTRA (NADPH-DEPENDENT THIOREDOXIN REDUCTASE A); thioredoxin-disulfide reductase | chr2:7564345-7566539 FORWARD
BnaC06g25130D	-3.11911	21.1	redox.thioredoxin	Symbols: ATH8 | ATH8 (thioredoxin H-type 8) | chr1:26321479-26322993 FORWARD
BnaC07g45590D	-1.1122	21.1	redox.thioredoxin	Symbols: ATNTRB, NTRB, NTR1 | NTRB (NADPH-DEPENDENT THIOREDOXIN REDUCTASE B); thioredoxin-disulfide reductase | chr4:16842188-16844082 FORWARD
BnaC07g50790D	-2.32132	21.1	redox.thioredoxin	Symbols: ACHT2 | thioredoxin family protein | chr4:14535607-14537250 REVERSE
BnaC08g22380D	-1.21042	21.1	redox.thioredoxin	Symbols: PLP3b | PLP3b (Phosducin-like protein 3 homolog); beta-tubulin binding | chr5:26519770-26521696 FORWARD
BnaC08g42050D	-1.27166	21.1	redox.thioredoxin	Symbols: ATCXXS1 | ATCXXS1 (C-terminal cysteine residue is changed to a serine 1); protein disulfide isomerase | chr1:3874437-3875484 FORWARD
BnaC08g45540D	-1.28158	21.1	redox.thioredoxin	Symbols: ATHM1, TRX-M1, ATM1 | ATHM1; enzyme activator | chr1:916819-918064 REVERSE
BnaC09g39720D	-7.96578	21.1	redox.thioredoxin	Symbols: ATAPRL7 | ATAPRL7 (APR-like 7) | chr5:5990956-5993936 FORWARD
BnaA01g22540D	-2.01184	21.2	redox.ascorbate and glutathione	Symbols: B5 #5, ATCB5LP, CB5LP | CB5LP (CYTOCHROME B5-LIKE PROTEIN); heme binding | chr1:22342414-22343014 REVERSE
BnaA03g15050D	-4.05889	21.2	redox.ascorbate and glutathione	Symbols: B5 #4, ATCB5-B, CB5-B | CB5-B (CYTOCHROME B5 ISOFORM B); heme binding | chr2:13876774-13878531 REVERSE
BnaA03g20200D	-2.01256	21.2	redox.ascorbate and glutathione	Symbols: ATGPX3 | ATGPX3 (GLUTATHIONE PEROXIDASE 3); glutathione peroxidase | chr2:18008642-18010600 REVERSE
BnaA04g19010D	-2.14516	21.2	redox.ascorbate and glutathione	Symbols: B5 #4, ATCB5-B, CB5-B | CB5-B (CYTOCHROME B5 ISOFORM B); heme binding | chr2:13876774-13878531 REVERSE
BnaA04g27110D	-1.46833	21.2	redox.ascorbate and glutathione	Symbols: B5 #1, ATCB5-C, CB5-C | CB5-C (CYTOCHROME B5 ISOFORM C); heme binding | chr2:19151646-19152600 FORWARD
BnaA08g19560D	-10.1799	21.2	redox.ascorbate and glutathione	cytochrome B561 family protein | chr1:9022542-9024081 REVERSE
BnaA09g49820D	-2.0903	21.2	redox.ascorbate and glutathione	2-oxoglutarate-dependent dioxygenase, putative | chr1:2035839-2037366 FORWARD
BnaA09g49830D	-2.13147	21.2	redox.ascorbate and glutathione	2-oxoglutarate-dependent dioxygenase, putative | chr1:2035839-2037366 FORWARD
BnaA10g04330D	-2.88489	21.2	redox.ascorbate and glutathione	2-oxoglutarate-dependent dioxygenase, putative | chr1:2025601-2027271 FORWARD
BnaA10g04340D	-8.85591	21.2	redox.ascorbate and glutathione	2-oxoglutarate-dependent dioxygenase, putative | chr1:2035839-2037366 FORWARD
BnaAnng16110D	-2.98715	21.2	redox.ascorbate and glutathione	Symbols: B5 #4, ATCB5-B, CB5-B | CB5-B (CYTOCHROME B5 ISOFORM B); heme binding | chr2:13876774-13878531 REVERSE
BnaAnng41830D	-1.53769	21.2	redox.ascorbate and glutathione	2-oxoglutarate-dependent dioxygenase, putative | chr1:2032338-2034018 FORWARD
BnaC03g24130D	-2.04336	21.2	redox.ascorbate and glutathione	Symbols: ATGPX3 | ATGPX3 (GLUTATHIONE PEROXIDASE 3); glutathione peroxidase | chr2:18008642-18010600 REVERSE
BnaC03g52720D	-1.69826	21.2	redox.ascorbate and glutathione	Symbols: ATMP2, ATMAPR3, MSBP2, MAPR3 | ATMP2; heme binding | chr3:18129601-18131573 FORWARD
BnaC04g12100D	-3.21297	21.2	redox.ascorbate and glutathione	Symbols: B5 #4, ATCB5-B, CB5-B | CB5-B (CYTOCHROME B5 ISOFORM B); heme binding | chr2:13876774-13878531 REVERSE
BnaC04g50950D	-1.08814	21.2	redox.ascorbate and glutathione	Symbols: B5 #1, ATCB5-C, CB5-C | CB5-C (CYTOCHROME B5 ISOFORM C); heme binding | chr2:19151646-19152600 FORWARD
BnaC05g04550D	-5.34403	21.2	redox.ascorbate and glutathione	2-oxoglutarate-dependent dioxygenase, putative | chr1:2025601-2027271 FORWARD
BnaC05g04560D	-4.49985	21.2	redox.ascorbate and glutathione	2-oxoglutarate-dependent dioxygenase, putative | chr1:2035839-2037366 FORWARD
BnaC07g11960D	-2.63869	21.2	redox.ascorbate and glutathione	cytochrome B561 family protein | chr1:9022542-9024081 REVERSE
BnaC08g20570D	-1.29783	21.2	redox.ascorbate and glutathione	Symbols: ATMP2, ATMAPR3, MSBP2, MAPR3 | ATMP2; heme binding | chr3:18129601-18131573 FORWARD
BnaC08g44860D	-1.46794	21.2	redox.ascorbate and glutathione	2-oxoglutarate-dependent dioxygenase, putative | chr1:2035839-2037366 FORWARD
BnaC08g44880D	-1.359	21.2	redox.ascorbate and glutathione	2-oxoglutarate-dependent dioxygenase, putative | chr1:2035839-2037366 FORWARD
BnaC09g14200D	-1.43976	21.2	redox.ascorbate and glutathione	Symbols: B5 #5, ATCB5LP, CB5LP | CB5LP (CYTOCHROME B5-LIKE PROTEIN); heme binding | chr1:22342414-22343014 REVERSE
BnaCnng29610D	-3.38103	21.2	redox.ascorbate and glutathione	cytochrome B561 family protein | chr1:9022542-9024081 REVERSE
BnaA03g35040D	8.42347	21.2	redox.ascorbate and glutathione	oxidoreductase, 2OG-Fe(II) oxygenase family protein | chr3:6553529-6555147 REVERSE
BnaA05g13330D	-1.82952	21.2	redox.ascorbate and glutathione	Symbols: AtMAPR4 | AtMAPR4 (Arabidopsis thaliana membrane-associated progesterone binding protein 4); heme binding | chr4:8551244-8553554 FORWARD
BnaA10g03920D	-8.73697	21.2	redox.ascorbate and glutathione	2-oxoglutarate-dependent dioxygenase, putative | chr1:2025601-2027271 FORWARD
BnaA10g07510D	-1.20482	21.2	redox.ascorbate and glutathione	Symbols: MSBP1, ATMP1, AtMAPR5 | MSBP1 (membrane steroid binding protein 1); steroid binding | chr5:21213058-21214739 FORWARD
BnaC05g04030D	-3.84967	21.2	redox.ascorbate and glutathione	2-oxoglutarate-dependent dioxygenase, putative | chr1:2025601-2027271 FORWARD
BnaC06g11520D	-1.05646	21.2	redox.ascorbate and glutathione	Symbols: AtMAPR4 | AtMAPR4 (Arabidopsis thaliana membrane-associated progesterone binding protein 4); heme binding | chr4:8551244-8553554 FORWARD
BnaC09g02560D	-1.89659	21.2	redox.ascorbate and glutathione	Symbols: ATB5-B, B5 #3, ATCB5-D, CB5-D | CB5-D (CYTOCHROME B5 ISOFORM D); heme binding | chr5:19789067-19790334 REVERSE
BnaCnng31860D	-10.4094	21.2	redox.ascorbate and glutathione	Symbols: ACYB-2 | ACYB-2; carbon-monoxide oxygenase | chr4:13053686-13055623 REVERSE
BnaA05g28340D	-2.68104	21.3	redox.heme	Symbols: AHB2, GLB2, ARATH GLB2, NSHB2 | AHB2 (ARABIDOPSIS HAEMOGLOBIN 2); oxygen transporter | chr3:3276226-3277860 REVERSE
BnaAnng36930D	-1.67158	21.3	redox.heme	Symbols: AHB2, GLB2, ARATH GLB2, NSHB2 | AHB2 (ARABIDOPSIS HAEMOGLOBIN 2); oxygen transporter | chr3:3276226-3277860 REVERSE
BnaA01g04300D	-1.34149	21.3	redox.heme	Symbols: GLB3 | GLB3; oxygen transporter | chr4:15765402-15767106 FORWARD
BnaA01g31630D	-3.43857	21.3	redox.heme	Symbols: AHB2, GLB2, ARATH GLB2, NSHB2 | AHB2 (ARABIDOPSIS HAEMOGLOBIN 2); oxygen transporter | chr3:3276226-3277860 REVERSE
BnaC05g42940D	-2.69172	21.3	redox.heme	SOUL heme-binding family protein | chr3:3130998-3133192 REVERSE
BnaC07g26160D	1.09671	21.3	redox.heme	SOUL heme-binding family protein | chr5:6798832-6800903 REVERSE
BnaA01g03830D	-1.12216	21.4	redox.glutaredoxins	glutaredoxin family protein | chr4:15940561-15941330 REVERSE
BnaA02g04900D	-2.61228	21.4	redox.glutaredoxins	glutaredoxin, putative | chr5:6938598-6939848 FORWARD
BnaA03g19420D	-3.31079	21.4	redox.glutaredoxins	glutaredoxin family protein | chr2:17226948-17228378 FORWARD
BnaA03g52330D	-1.45145	21.4	redox.glutaredoxins	glutaredoxin family protein | chr4:15940561-15941330 REVERSE
BnaA04g03030D	-1.37281	21.4	redox.glutaredoxins	glutaredoxin family protein | chr3:21123924-21125647 FORWARD
BnaA04g11830D	-1.12171	21.4	redox.glutaredoxins	glutaredoxin, putative | chr5:16147594-16149198 REVERSE
BnaA04g23830D	-1.46979	21.4	redox.glutaredoxins	glutaredoxin family protein | chr2:17226948-17228378 FORWARD
BnaA09g02360D	-3.57862	21.4	redox.glutaredoxins	glutaredoxin family protein | chr3:10848669-10850122 FORWARD
BnaA09g06320D	-1.85401	21.4	redox.glutaredoxins	glutaredoxin, putative | chr5:25286223-25287694 FORWARD
BnaA09g07960D	-1.14873	21.4	redox.glutaredoxins	glutaredoxin, putative | chr1:29073843-29074796 FORWARD
BnaA09g49730D	-1.51794	21.4	redox.glutaredoxins	glutaredoxin family protein | chr1:2097151-2097655 FORWARD
BnaA10g29790D	-1.13007	21.4	redox.glutaredoxins	glutaredoxin family protein | chr5:4455333-4457019 FORWARD
BnaAnng00840D	-2.9386	21.4	redox.glutaredoxins	glutaredoxin family protein | chr5:1035658-1036967 REVERSE
BnaAnng04400D	-2.34341	21.4	redox.glutaredoxins	electron carrier/ protein disulfide oxidoreductase | chr4:5444345-5446891 FORWARD
BnaC03g01480D	-10.8271	21.4	redox.glutaredoxins	glutaredoxin family protein | chr5:1035658-1036967 REVERSE
BnaC04g33910D	-1.14237	21.4	redox.glutaredoxins	glutaredoxin, putative | chr5:16147594-16149198 REVERSE
BnaC05g04720D	-4.38939	21.4	redox.glutaredoxins	glutaredoxin family protein | chr1:2097151-2097655 FORWARD
BnaC07g10320D	-6.85086	21.4	redox.glutaredoxins	Symbols: GRX480 | GRX480; electron carrier/ protein disulfide oxidoreductase | chr1:10013474-10014073 REVERSE
BnaC07g44080D	-1.52063	21.4	redox.glutaredoxins	glutaredoxin family protein | chr4:15940561-15941330 REVERSE
BnaC09g08100D	-1.88404	21.4	redox.glutaredoxins	glutaredoxin, putative | chr1:29073843-29074796 FORWARD
BnaA09g12210D	3.17448	21.4	redox.glutaredoxins	glutaredoxin family protein | chr1:23953233-23954492 FORWARD
BnaA01g28610D	-1.02316	21.4	redox.glutaredoxins	Symbols: ATGRX4, GRX4 | GRX4 (GLUTAREDOXIN 4); metal ion binding | chr3:5307944-5309557 REVERSE
BnaA03g04510D	-1.03493	21.4	redox.glutaredoxins	glutaredoxin family protein | chr5:4455333-4457019 FORWARD
BnaA03g24450D	-8.17991	21.4	redox.glutaredoxins	glutaredoxin family protein | chr4:6566625-6567629 REVERSE
BnaA06g22490D	-1.10279	21.4	redox.glutaredoxins	glutaredoxin, putative | chr5:25286223-25287694 FORWARD
BnaA07g08330D	-6.2258	21.4	redox.glutaredoxins	Symbols: GRX480 | GRX480; electron carrier/ protein disulfide oxidoreductase | chr1:10013474-10014073 REVERSE
BnaA09g24210D	-3.52356	21.4	redox.glutaredoxins	glutaredoxin family protein | chr1:11858211-11859292 FORWARD
BnaA09g27230D	-3.50407	21.4	redox.glutaredoxins	Symbols: GRX480 | GRX480; electron carrier/ protein disulfide oxidoreductase | chr1:10013474-10014073 REVERSE
BnaA10g02210D	-2.68172	21.4	redox.glutaredoxins	glutaredoxin family protein | chr1:976097-977761 REVERSE
BnaC03g05180D	1.92953	21.4	redox.glutaredoxins	glutaredoxin family protein | chr5:3844940-3845645 REVERSE
BnaC05g02130D	-2.20387	21.4	redox.glutaredoxins	glutaredoxin family protein | chr1:976097-977761 REVERSE
BnaC05g37680D	-1.615	21.4	redox.glutaredoxins	Symbols: ATGRX4, GRX4 | GRX4 (GLUTAREDOXIN 4); metal ion binding | chr3:5307944-5309557 REVERSE
BnaC08g13210D	-1.24057	21.4	redox.glutaredoxins	glutaredoxin family protein | chr4:14199096-14200901 FORWARD
BnaC09g01870D	-9.28386	21.4	redox.glutaredoxins	glutaredoxin family protein | chr3:10848669-10850122 FORWARD
BnaC09g01880D	-9.45121	21.4	redox.glutaredoxins	glutaredoxin family protein | chr3:10848669-10850122 FORWARD
BnaCnng39030D	1.91292	21.4	redox.glutaredoxins	glutaredoxin family protein | chr1:23953233-23954492 FORWARD
BnaC06g27340D	1.82274	21.5	redox.peroxiredoxin	Symbols: TPX1 | TPX1 (thioredoxin-dependent peroxidase 1); antioxidant/ oxidoreductase | chr1:24559306-24560936 REVERSE
BnaA07g25540D	1.14367	21.5	redox.peroxiredoxin	Symbols: TPX1 | TPX1 (thioredoxin-dependent peroxidase 1); antioxidant/ oxidoreductase | chr1:24559306-24560936 REVERSE
BnaA05g31230D	-1.31757	21.5	redox.peroxiredoxin	Symbols: PRXIIF, ATPRXIIF | PRXIIF (PEROXIREDOXIN IIF); antioxidant/ peroxidase | chr3:1826073-1827861 REVERSE
BnaC09g25680D	-3.42884	21.5	redox.peroxiredoxin	Symbols: TPX1 | TPX1 (thioredoxin-dependent peroxidase 1); antioxidant/ oxidoreductase | chr1:24559306-24560936 REVERSE
BnaA06g14510D	-4.05431	21.6	redox.dismutases and catalases	Symbols: CAT3, SEN2, ATCAT3 | CAT3 (CATALASE 3); catalase | chr1:7143067-7146540 FORWARD
BnaA07g11370D	-3.69309	21.6	redox.dismutases and catalases	Symbols: CAT3, SEN2, ATCAT3 | CAT3 (CATALASE 3); catalase | chr1:7143067-7146540 FORWARD
BnaA08g21730D	-2.148	21.6	redox.dismutases and catalases	Symbols: CAT3, SEN2, ATCAT3 | CAT3 (CATALASE 3); catalase | chr1:7143067-7146540 FORWARD
BnaA09g47090D	-1.48292	21.6	redox.dismutases and catalases	Symbols: ATCCS | ATCCS (COPPER CHAPERONE FOR SOD1); superoxide dismutase/ superoxide dismutase copper chaperone | chr1:4267106-4268926 REVERSE
BnaA10g16720D	-2.39297	21.6	redox.dismutases and catalases	Symbols: CSD3 | CSD3 (copper/zinc superoxide dismutase 3); superoxide dismutase | chr5:5987187-5988885 FORWARD
BnaC02g42190D	-1.90438	21.6	redox.dismutases and catalases	Symbols: FSD3 | FSD3 (FE SUPEROXIDE DISMUTASE 3); superoxide dismutase | chr5:7850523-7852532 FORWARD
BnaC05g15970D	-4.30201	21.6	redox.dismutases and catalases	Symbols: CAT3, SEN2, ATCAT3 | CAT3 (CATALASE 3); catalase | chr1:7143067-7146540 FORWARD
BnaC07g15280D	-4.74316	21.6	redox.dismutases and catalases	Symbols: CAT3, SEN2, ATCAT3 | CAT3 (CATALASE 3); catalase | chr1:7143067-7146540 FORWARD
BnaC08g19360D	-2.88839	21.6	redox.dismutases and catalases	Symbols: CAT3, SEN2, ATCAT3 | CAT3 (CATALASE 3); catalase | chr1:7143067-7146540 FORWARD
BnaC08g41150D	-1.95899	21.6	redox.dismutases and catalases	Symbols: ATCCS | ATCCS (COPPER CHAPERONE FOR SOD1); superoxide dismutase/ superoxide dismutase copper chaperone | chr1:4267106-4268926 REVERSE
BnaC09g10980D	-1.00042	21.6	redox.dismutases and catalases	Symbols: ATCCS | ATCCS (COPPER CHAPERONE FOR SOD1); superoxide dismutase/ superoxide dismutase copper chaperone | chr1:4267106-4268926 REVERSE
BnaC09g39740D	-1.58496	21.6	redox.dismutases and catalases	Symbols: CSD3 | CSD3 (copper/zinc superoxide dismutase 3); superoxide dismutase | chr5:5987187-5988885 FORWARD
BnaA07g11360D	1.00758	21.6	redox.dismutases and catalases	Symbols: CAT1 | CAT1 (CATALASE 1); catalase | chr1:7146636-7149977 FORWARD
BnaA01g31350D	-1.1432	21.6	redox.dismutases and catalases	Symbols: MSD1, MEE33, ATMSD1 | MSD1 (MANGANESE SUPEROXIDE DISMUTASE 1); metal ion binding / superoxide dismutase | chr3:3417954-3419853 FORWARD
BnaA03g53180D	1.06162	21.6	redox.dismutases and catalases	Symbols: CAT2 | CAT2 (CATALASE 2); catalase | chr4:16700596-16703325 REVERSE
BnaA05g28000D	-1.43839	21.6	redox.dismutases and catalases	Symbols: MSD1, MEE33, ATMSD1 | MSD1 (MANGANESE SUPEROXIDE DISMUTASE 1); metal ion binding / superoxide dismutase | chr3:3417954-3419853 FORWARD
BnaA06g05150D	1.5228	21.6	redox.dismutases and catalases	Symbols: CSD1 | CSD1 (COPPER/ZINC SUPEROXIDE DISMUTASE 1); superoxide dismutase | chr1:2827061-2829315 FORWARD
BnaC03g65530D	1.70311	21.6	redox.dismutases and catalases	Symbols: CAT2 | CAT2 (CATALASE 2); catalase | chr4:16700596-16703325 REVERSE
BnaC07g15270D	1.33857	21.6	redox.dismutases and catalases	Symbols: CAT1 | CAT1 (CATALASE 1); catalase | chr1:7146636-7149977 FORWARD
BnaC07g39340D	-1.37794	21.6	redox.dismutases and catalases	Symbols: FSD1 | FSD1 (FE SUPEROXIDE DISMUTASE 1); copper ion binding / superoxide dismutase | chr4:12884300-12886695 REVERSE
BnaC07g45360D	1.22415	21.6	redox.dismutases and catalases	Symbols: CAT2 | CAT2 (CATALASE 2); catalase | chr4:16700596-16703325 REVERSE
BnaC09g04910D	-1.79057	21.6	redox.dismutases and catalases	Symbols: FSD3 | FSD3 (FE SUPEROXIDE DISMUTASE 3); superoxide dismutase | chr5:7850523-7852532 FORWARD
BnaA03g06710D	-1.02901	21.99	redox.misc	Symbols: ATCBR, CBR1 | ATCBR (ARABIDOPSIS THALIANA NADH:CYTOCHROME B5 REDUCTASE 1); cytochrome-b5 reductase | chr5:5864251-5866709 REVERSE
BnaA08g07990D	-2.28608	21.99	redox.misc	Symbols: ATSRX, SRX | SRX (SULFIREDOXIN); DNA binding / oxidoreductase, acting on sulfur group of donors | chr1:11133485-11134405 FORWARD
BnaC02g07470D	-1.93337	21.99	redox.misc	Symbols: ATCBR, CBR1 | ATCBR (ARABIDOPSIS THALIANA NADH:CYTOCHROME B5 REDUCTASE 1); cytochrome-b5 reductase | chr5:5864251-5866709 REVERSE
BnaC08g09260D	-1.09878	21.99	redox.misc	Symbols: ATSRX, SRX | SRX (SULFIREDOXIN); DNA binding / oxidoreductase, acting on sulfur group of donors | chr1:11133485-11134405 FORWARD
BnaCnng67150D	2.16751	21.99	redox.misc	iron ion binding / oxidoreductase, acting on paired donors, with incorporation or reduction of molecular oxygen, 2-oxoglutarate as one donor, and incorporation of one atom each of oxygen into both donors | chr5:21089383-21090941 FORWARD
BnaC01g19770D	-1.3229	23	nucleotide metabolism	histidine triad family protein / HIT family protein | chr4:9334622-9335968 REVERSE
BnaA02g34000D	-2.42561	23.2	nucleotide metabolism.degradation	Symbols: SAL2, ATSAL2 | SAL2; 3'(2'),5'-bisphosphate nucleotidase/ inositol or phosphatidylinositol phosphatase | chr5:25616638-25618631 FORWARD
BnaA03g49610D	-1.38757	23.2	nucleotide metabolism.degradation	Symbols: CDA1, AT-CDA1, DESZ | CDA1 (CYTIDINE DEAMINASE 1); cytidine deaminase | chr2:8470374-8471644 REVERSE
BnaA04g21890D	-2.65647	23.2	nucleotide metabolism.degradation	Symbols: FAC1, ATAMPD | FAC1 (EMBRYONIC FACTOR1); AMP deaminase | chr2:16033448-16038876 REVERSE
BnaA06g09020D	-1.90414	23.2	nucleotide metabolism.degradation	nucleoside phosphatase family protein / GDA1/CD39 family protein | chr1:4861266-4864094 FORWARD
BnaA06g09030D	-3.88413	23.2	nucleotide metabolism.degradation	nucleoside phosphatase family protein / GDA1/CD39 family protein | chr1:4868452-4871488 FORWARD
BnaA09g20120D	-1.44709	23.2	nucleotide metabolism.degradation	Symbols: ATALN | ATALN (Arabidopsis allantoinase); allantoinase/ hydrolase | chr4:2522034-2525280 REVERSE
BnaA09g20190D	-1.67254	23.2	nucleotide metabolism.degradation	adenosine/AMP deaminase family protein | chr4:2464859-2467166 REVERSE
BnaAnng21580D	-1.28863	23.2	nucleotide metabolism.degradation	Symbols: AHL, ATAHL | AHL (ARABIDOPSIS HAL2-LIKE); 3'(2'),5'-bisphosphate nucleotidase/ inositol or phosphatidylinositol phosphatase | chr5:22085998-22088017 FORWARD
BnaAnng23340D	-2.99139	23.2	nucleotide metabolism.degradation	cytidine/deoxycytidylate deaminase family protein | chr5:10043914-10045882 REVERSE
BnaC02g18410D	-1.30988	23.2	nucleotide metabolism.degradation	Symbols: TADA | TADA (TRNA ARGININE ADENOSINE DEAMINASE); catalytic/ hydrolase/ zinc ion binding | chr1:25804418-25808982 FORWARD
BnaC02g42860D	-1.73032	23.2	nucleotide metabolism.degradation	Symbols: SAL2, ATSAL2 | SAL2; 3'(2'),5'-bisphosphate nucleotidase/ inositol or phosphatidylinositol phosphatase | chr5:25616638-25618631 FORWARD
BnaC04g56640D	-1.97373	23.2	nucleotide metabolism.degradation	Symbols: FAC1, ATAMPD | FAC1 (EMBRYONIC FACTOR1); AMP deaminase | chr2:16033448-16038876 REVERSE
BnaC05g10480D	-2.3462	23.2	nucleotide metabolism.degradation	nucleoside phosphatase family protein / GDA1/CD39 family protein | chr1:4868452-4871488 FORWARD
BnaC07g50780D	-1.26448	23.2	nucleotide metabolism.degradation	Symbols: CDA1, AT-CDA1, DESZ | CDA1 (CYTIDINE DEAMINASE 1); cytidine deaminase | chr2:8470374-8471644 REVERSE
BnaC08g39780D	-3.54777	23.2	nucleotide metabolism.degradation	nucleoside phosphatase family protein / GDA1/CD39 family protein | chr1:4868452-4871488 FORWARD
BnaC09g22450D	-2.18786	23.2	nucleotide metabolism.degradation	Symbols: ATALN | ATALN (Arabidopsis allantoinase); allantoinase/ hydrolase | chr4:2522034-2525280 REVERSE
BnaC09g22520D	-1.05316	23.2	nucleotide metabolism.degradation	adenosine/AMP deaminase family protein | chr4:2464859-2467166 REVERSE
BnaCnng16680D	-3.51896	23.2	nucleotide metabolism.degradation	Symbols: AHL, ATAHL | AHL (ARABIDOPSIS HAL2-LIKE); 3'(2'),5'-bisphosphate nucleotidase/ inositol or phosphatidylinositol phosphatase | chr5:22085998-22088017 FORWARD
BnaCnng32980D	-1.7575	23.2	nucleotide metabolism.degradation	Symbols: CDA1, AT-CDA1, DESZ | CDA1 (CYTIDINE DEAMINASE 1); cytidine deaminase | chr2:8470374-8471644 REVERSE
BnaCnng46690D	-3.01129	23.2	nucleotide metabolism.degradation	Symbols: ATXDH1, XDH1 | XDH1 (XANTHINE DEHYDROGENASE 1); xanthine dehydrogenase | chr4:16618573-16625057 REVERSE
BnaA06g23130D	2.67735	23.2	nucleotide metabolism.degradation	3'(2'),5'-bisphosphate nucleotidase, putative / inositol polyphosphate 1-phosphatase, putative | chr5:25613258-25615880 FORWARD
BnaA10g16150D	1.82366	23.2	nucleotide metabolism.degradation	inosine-uridine preferring nucleoside hydrolase family protein | chr5:6290676-6295811 FORWARD
BnaC03g50270D	2.71256	23.2	nucleotide metabolism.degradation	3'(2'),5'-bisphosphate nucleotidase, putative / inositol polyphosphate 1-phosphatase, putative | chr5:25613258-25615880 FORWARD
BnaA06g33910D	2.44535	23.2	nucleotide metabolism.degradation	nucleoside phosphatase family protein / GDA1/CD39 family protein | chr2:865070-868289 REVERSE
BnaA03g18020D	-1.3071	23.2	nucleotide metabolism.degradation	5'-nucleotidase/ magnesium ion binding | chr2:16174011-16176080 REVERSE
BnaA09g45660D	-9.60115	23.2	nucleotide metabolism.degradation	nucleoside phosphatase family protein / GDA1/CD39 family protein | chr1:4865005-4868000 FORWARD
BnaA10g08220D	-2.06687	23.2	nucleotide metabolism.degradation	Symbols: AHL, ATAHL | AHL (ARABIDOPSIS HAL2-LIKE); 3'(2'),5'-bisphosphate nucleotidase/ inositol or phosphatidylinositol phosphatase | chr5:22085998-22088017 FORWARD
BnaC01g40230D	2.50629	23.2	nucleotide metabolism.degradation	Symbols: ATAPY1 | ATAPY1 (APYRASE 1); ATPase/ calmodulin binding / nucleotide diphosphatase | chr3:1067790-1071295 REVERSE
BnaC03g21540D	-1.25441	23.2	nucleotide metabolism.degradation	5'-nucleotidase/ magnesium ion binding | chr2:16174011-16176080 REVERSE
BnaC05g40130D	1.04026	23.2	nucleotide metabolism.degradation	Symbols: ATAPY1 | ATAPY1 (APYRASE 1); ATPase/ calmodulin binding / nucleotide diphosphatase | chr3:1067790-1071295 REVERSE
BnaC05g47480D	1.00441	23.2	nucleotide metabolism.degradation	Symbols: ATAPY1 | ATAPY1 (APYRASE 1); ATPase/ calmodulin binding / nucleotide diphosphatase | chr3:1067790-1071295 REVERSE
BnaC09g06200D	1.15455	23.2	nucleotide metabolism.degradation	Symbols: SAL1, ALX8, ATSAL1, HOS2, FRY1 | SAL1; 3'(2'),5'-bisphosphate nucleotidase/ inositol or phosphatidylinositol phosphatase | chr5:25609812-25611933 FORWARD
BnaC09g30760D	-1.03568	23.2	nucleotide metabolism.degradation	Symbols: AHL, ATAHL | AHL (ARABIDOPSIS HAL2-LIKE); 3'(2'),5'-bisphosphate nucleotidase/ inositol or phosphatidylinositol phosphatase | chr5:22085998-22088017 FORWARD
BnaA02g15730D	-1.20928	23.3	nucleotide metabolism.salvage	deoxynucleoside kinase family | chr1:27111894-27114342 REVERSE
BnaA07g29830D	-1.45378	23.3	nucleotide metabolism.salvage	deoxynucleoside kinase family | chr1:27111894-27114342 REVERSE
BnaA09g19350D	-2.4665	23.3	nucleotide metabolism.salvage	Symbols: ATUPS1 | ATUPS1 (ARABIDOPSIS THALIANA UREIDE PERMEASE 1); allantoin uptake transmembrane transporter | chr2:1094757-1096968 FORWARD
BnaC05g20350D	-2.14237	23.3	nucleotide metabolism.salvage	Symbols: ATUPS5 | ATUPS5 (ARABIDOPSIS THALIANA UREIDE PERMEASE 5); allantoin uptake transmembrane transporter/ uracil transmembrane transporter/ xanthine transmembrane transporter | chr1:9143967-9146049 REVERSE
BnaC06g33070D	-1.3599	23.3	nucleotide metabolism.salvage	deoxynucleoside kinase family | chr1:27111894-27114342 REVERSE
BnaC08g23730D	-3.61305	23.3	nucleotide metabolism.salvage	deoxynucleoside kinase family | chr1:27111894-27114342 REVERSE
BnaA07g16170D	-1.45851	24	Biodegradation of Xenobiotics	glyoxal oxidase-related | chr3:19975619-19977439 FORWARD
BnaC06g42590D	-2.29262	24	Biodegradation of Xenobiotics	glyoxal oxidase-related | chr3:19975619-19977439 FORWARD
BnaA06g19010D	2.94251	24	Biodegradation of Xenobiotics	Symbols: ATCXE12, CXE12 | CXE12; carboxylesterase | chr3:18037047-18038234 REVERSE
BnaC06g02750D	2.57785	24	Biodegradation of Xenobiotics	Symbols: AtCXE5 | AtCXE5 (Arabidopsis thaliana carboxyesterase 5); carboxylesterase | chr1:18378697-18379799 REVERSE
BnaC05g26220D	2.76079	24	Biodegradation of Xenobiotics	Symbols: AtCXE5 | AtCXE5 (Arabidopsis thaliana carboxyesterase 5); carboxylesterase | chr1:18378697-18379799 REVERSE
BnaA06g02980D	6.21229	24	Biodegradation of Xenobiotics	Symbols: AtCXE5 | AtCXE5 (Arabidopsis thaliana carboxyesterase 5); carboxylesterase | chr1:18378697-18379799 REVERSE
BnaA10g15570D	1.57595	24	Biodegradation of Xenobiotics	glyoxal oxidase-related | chr5:6607371-6609626 REVERSE
BnaC03g52990D	1.19761	24	Biodegradation of Xenobiotics	Symbols: ATCXE12, CXE12 | CXE12; carboxylesterase | chr3:18037047-18038234 REVERSE
BnaA04g25070D	-1.6356	24.1	Biodegradation of Xenobiotics.hydroxyacylglutathione hydrolase	Symbols: GLX2-1, GLY1 | GLX2-1 (GLYOXALASE 2-1); hydroxyacylglutathione hydrolase | chr2:18035369-18038255 REVERSE
BnaA09g50050D	-1.53596	24.1	Biodegradation of Xenobiotics.hydroxyacylglutathione hydrolase	Symbols: GLX2-4 | GLX2-4 (glyoxalase 2-4); hydrolase/ hydroxyacylglutathione hydrolase/ zinc ion binding | chr1:1857767-1860730 REVERSE
BnaC08g44630D	-2.35007	24.1	Biodegradation of Xenobiotics.hydroxyacylglutathione hydrolase	Symbols: GLX2-4 | GLX2-4 (glyoxalase 2-4); hydrolase/ hydroxyacylglutathione hydrolase/ zinc ion binding | chr1:1857767-1860730 REVERSE
BnaC03g17440D	1.30173	24.1	Biodegradation of Xenobiotics.hydroxyacylglutathione hydrolase	Symbols: GLX2-5 | GLX2-5 (GLYOXALASE 2-5); hydroxyacylglutathione hydrolase/ iron ion binding / zinc ion binding | chr2:13368292-13371057 FORWARD
BnaA03g14380D	1.05738	24.1	Biodegradation of Xenobiotics.hydroxyacylglutathione hydrolase	Symbols: GLX2-5 | GLX2-5 (GLYOXALASE 2-5); hydroxyacylglutathione hydrolase/ iron ion binding / zinc ion binding | chr2:13368292-13371057 FORWARD
BnaA06g00850D	-1.67694	24.1	Biodegradation of Xenobiotics.hydroxyacylglutathione hydrolase	Symbols: GLX2-3, ETHE1, GLY3 | GLY3 (GLYOXALASE II 3); hydrolase/ hydroxyacylglutathione hydrolase | chr1:19991275-19993334 REVERSE
BnaC03g69760D	-1.21206	24.1	Biodegradation of Xenobiotics.hydroxyacylglutathione hydrolase	Symbols: GLX2-3, ETHE1, GLY3 | GLY3 (GLYOXALASE II 3); hydrolase/ hydroxyacylglutathione hydrolase | chr1:19991275-19993334 REVERSE
BnaA05g35240D	-1.13117	24.2	Biodegradation of Xenobiotics.lactoylglutathione lyase	lactoylglutathione lyase family protein / glyoxalase I family protein | chr2:13644395-13645799 FORWARD
BnaCnng59150D	-1.36528	24.2	Biodegradation of Xenobiotics.lactoylglutathione lyase	lactoylglutathione lyase family protein / glyoxalase I family protein | chr2:13644395-13645799 FORWARD
BnaA02g19970D	2.80864	24.2	Biodegradation of Xenobiotics.lactoylglutathione lyase	lactoylglutathione lyase family protein / glyoxalase I family protein | chr1:30151003-30152190 FORWARD
BnaA06g10060D	5.53916	24.2	Biodegradation of Xenobiotics.lactoylglutathione lyase	lactoylglutathione lyase family protein / glyoxalase I family protein | chr1:5290745-5292535 FORWARD
BnaC05g05340D	9.10329	24.2	Biodegradation of Xenobiotics.lactoylglutathione lyase	Symbols: ATDSI-1VOC | ATDSI-1VOC (DESSICATION-INDUCED 1VOC SUPERFAMILY PROTEIN); catalytic | chr1:2367437-2368385 REVERSE
BnaC05g11680D	2.00576	24.2	Biodegradation of Xenobiotics.lactoylglutathione lyase	lactoylglutathione lyase family protein / glyoxalase I family protein | chr1:5290745-5292535 FORWARD
BnaC09g11920D	-2.5571	24.2	Biodegradation of Xenobiotics.lactoylglutathione lyase	lactoylglutathione lyase family protein / glyoxalase I family protein | chr1:23824514-23825383 FORWARD
BnaC05g38330D	-1.59202	24.3	Biodegradation of Xenobiotics.3-hydroxybutyryl-CoA dehydrogenase	3-hydroxybutyryl-CoA dehydrogenase, putative | chr3:5144997-5146856 FORWARD
BnaA01g03860D	-1.09137	25	C1-metabolism	Symbols: AtGLDP1 | AtGLDP1 (Arabidopsis thaliana glycine decarboxylase P-protein 1); catalytic/ glycine dehydrogenase (decarboxylating)/ pyridoxal phosphate binding | chr4:15926670-15931332 REVERSE
BnaA03g19510D	-1.74984	25	C1-metabolism	Symbols: ATSFGH, SFGH | SFGH (S-FORMYLGLUTATHIONE HYDROLASE); S-formylglutathione hydrolase/ hydrolase, acting on ester bonds | chr2:17323495-17325618 REVERSE
BnaA05g02260D	-2.18307	25	C1-metabolism	Symbols: ATSFGH, SFGH | SFGH (S-FORMYLGLUTATHIONE HYDROLASE); S-formylglutathione hydrolase/ hydrolase, acting on ester bonds | chr2:17323495-17325618 REVERSE
BnaAnng12730D	-3.9184	25	C1-metabolism	dimethylmenaquinone methyltransferase family protein | chr3:600893-602259 REVERSE
BnaC03g23390D	-2.25987	25	C1-metabolism	Symbols: ATSFGH, SFGH | SFGH (S-FORMYLGLUTATHIONE HYDROLASE); S-formylglutathione hydrolase/ hydrolase, acting on ester bonds | chr2:17323495-17325618 REVERSE
BnaC03g77370D	-1.53805	25	C1-metabolism	Symbols: SKB1, ATPRMT5 | SKB1 (SHK1 BINDING PROTEIN 1); protein methyltransferase | chr4:15132011-15136639 REVERSE
BnaC04g01950D	-1.04836	25	C1-metabolism	Symbols: ATSFGH, SFGH | SFGH (S-FORMYLGLUTATHIONE HYDROLASE); S-formylglutathione hydrolase/ hydrolase, acting on ester bonds | chr2:17323495-17325618 REVERSE
BnaC08g12220D	7.88671	25	C1-metabolism	Symbols: GAMT1 | GAMT1; S-adenosylmethionine-dependent methyltransferase/ gibberellin carboxyl-O-methyltransferase | chr4:13350796-13352569 REVERSE
BnaC03g67280D	-1.45332	25.1	C1-metabolism.glycine hydroxymethyltransferase	Symbols: SHM3 | SHM3 (SERINE HYDROXYMETHYLTRANSFERASE 3); catalytic/ glycine hydroxymethyltransferase/ pyridoxal phosphate binding | chr4:15689464-15692857 REVERSE
BnaCnng19300D	2.79711	25.1	C1-metabolism.glycine hydroxymethyltransferase	Symbols: SHM4 | SHM4 (serine hydroxymethyltransferase 4); catalytic/ glycine hydroxymethyltransferase/ pyridoxal phosphate binding | chr4:8047692-8050106 REVERSE
BnaA04g06460D	2.93609	25.1	C1-metabolism.glycine hydroxymethyltransferase	Symbols: SHM4 | SHM4 (serine hydroxymethyltransferase 4); catalytic/ glycine hydroxymethyltransferase/ pyridoxal phosphate binding | chr4:8047692-8050106 REVERSE
BnaA08g06130D	1.64452	25.1	C1-metabolism.glycine hydroxymethyltransferase	Symbols: SHM7 | SHM7 (serine hydroxymethyltransferase 7); catalytic/ glycine hydroxymethyltransferase/ pyridoxal phosphate binding | chr1:13696042-13698639 REVERSE
BnaC08g06530D	1.20962	25.1	C1-metabolism.glycine hydroxymethyltransferase	Symbols: SHM7 | SHM7 (serine hydroxymethyltransferase 7); catalytic/ glycine hydroxymethyltransferase/ pyridoxal phosphate binding | chr1:13696042-13698639 REVERSE
BnaCnng17010D	-1.51632	25.1	C1-metabolism.glycine hydroxymethyltransferase	Symbols: SHM2 | SHM2 (SERINE HYDROXYMETHYLTRANSFERASE 2); catalytic/ glycine hydroxymethyltransferase/ pyridoxal phosphate binding | chr5:9418195-9422091 FORWARD
BnaA05g15830D	-2.01571	25.2	C1-metabolism.formate-tetrahydrofolate ligase	Symbols: THFS | THFS (10-FORMYLTETRAHYDROFOLATE SYNTHETASE); ATP binding / copper ion binding / formate-tetrahydrofolate ligase | chr1:18701951-18704938 FORWARD
BnaA06g02790D	-2.67158	25.2	C1-metabolism.formate-tetrahydrofolate ligase	Symbols: THFS | THFS (10-FORMYLTETRAHYDROFOLATE SYNTHETASE); ATP binding / copper ion binding / formate-tetrahydrofolate ligase | chr1:18701951-18704938 FORWARD
BnaC05g51210D	-2.5115	25.2	C1-metabolism.formate-tetrahydrofolate ligase	Symbols: THFS | THFS (10-FORMYLTETRAHYDROFOLATE SYNTHETASE); ATP binding / copper ion binding / formate-tetrahydrofolate ligase | chr1:18701951-18704938 FORWARD
BnaA01g06970D	-4.0851	25.3	C1-metabolism.dihydropteridine diphosphokinase	dihydropterin pyrophosphokinase, putative / dihydropteroate synthase, putative / DHPS, putative | chr4:14670156-14672669 REVERSE
BnaC01g08380D	-2.94996	25.3	C1-metabolism.dihydropteridine diphosphokinase	dihydropterin pyrophosphokinase, putative / dihydropteroate synthase, putative / DHPS, putative | chr4:14670156-14672669 REVERSE
BnaA02g01390D	-2.3212	25.4	C1-metabolism.5-formyltetrahydrofolate cyclo-ligase	Symbols: 5-FCL | 5-FCL (5-FORMYLTETRAHYDROFOLATE CYCLOLIGASE); 5-formyltetrahydrofolate cyclo-ligase | chr5:4136556-4138792 REVERSE
BnaA07g21280D	-2.10258	25.4	C1-metabolism.5-formyltetrahydrofolate cyclo-ligase	5-formyltetrahydrofolate cyclo-ligase family protein | chr1:28802925-28804784 REVERSE
BnaA10g20240D	-1.74111	25.4	C1-metabolism.5-formyltetrahydrofolate cyclo-ligase	Symbols: 5-FCL | 5-FCL (5-FORMYLTETRAHYDROFOLATE CYCLOLIGASE); 5-formyltetrahydrofolate cyclo-ligase | chr5:4136556-4138792 REVERSE
BnaC06g21660D	-1.98326	25.4	C1-metabolism.5-formyltetrahydrofolate cyclo-ligase	5-formyltetrahydrofolate cyclo-ligase family protein | chr1:28802925-28804784 REVERSE
BnaC09g44050D	-1.31039	25.4	C1-metabolism.5-formyltetrahydrofolate cyclo-ligase	Symbols: 5-FCL | 5-FCL (5-FORMYLTETRAHYDROFOLATE CYCLOLIGASE); 5-formyltetrahydrofolate cyclo-ligase | chr5:4136556-4138792 REVERSE
BnaA04g22120D	-3.25873	25.5	C1-metabolism.Methylenetetrahydrofolate dehydrogenase & Methenyltetrahydrofolate cyclohydrolase	tetrahydrofolate dehydrogenase/cyclohydrolase, putative | chr2:16165958-16168385 FORWARD
BnaA05g26750D	-1.19535	25.5	C1-metabolism.Methylenetetrahydrofolate dehydrogenase & Methenyltetrahydrofolate cyclohydrolase	tetrahydrofolate dehydrogenase/cyclohydrolase, putative | chr3:3919502-3921519 FORWARD
BnaC03g37500D	-1.59491	25.5	C1-metabolism.Methylenetetrahydrofolate dehydrogenase & Methenyltetrahydrofolate cyclohydrolase	tetrahydrofolate dehydrogenase/cyclohydrolase, putative | chr3:3919502-3921519 FORWARD
BnaC04g45850D	-4.1657	25.5	C1-metabolism.Methylenetetrahydrofolate dehydrogenase & Methenyltetrahydrofolate cyclohydrolase	tetrahydrofolate dehydrogenase/cyclohydrolase, putative | chr2:16165958-16168385 FORWARD
BnaA02g30310D	-5.23156	25.7	C1-metabolism.GTP cyclohydrolase I	GTP cyclohydrolase I | chr3:2315077-2317188 FORWARD
BnaA05g30330D	-4.58585	25.7	C1-metabolism.GTP cyclohydrolase I	GTP cyclohydrolase I | chr3:2315077-2317188 FORWARD
BnaC02g38700D	-2.42321	25.7	C1-metabolism.GTP cyclohydrolase I	GTP cyclohydrolase I | chr3:2315077-2317188 FORWARD
BnaA01g31960D	-1.73264	25.8	C1-metabolism.tetrahydrofolate synthase	Symbols: ATDFC, DFC | DFC (DHFS-FPGS HOMOLOG C); tetrahydrofolylpolyglutamate synthase | chr3:3139383-3144523 REVERSE
BnaA09g35250D	-2.49143	25.8	C1-metabolism.tetrahydrofolate synthase	Symbols: ATDFD | ATDFD (A. THALIANA DHFS-FPGS HOMOLOG D); tetrahydrofolylpolyglutamate synthase | chr3:20636669-20639492 FORWARD
BnaC08g26580D	-2.48635	25.8	C1-metabolism.tetrahydrofolate synthase	Symbols: ATDFD | ATDFD (A. THALIANA DHFS-FPGS HOMOLOG D); tetrahydrofolylpolyglutamate synthase | chr3:20636669-20639492 FORWARD
BnaA05g27330D	-2.08625	25.9	C1-metabolism.dihydroneopterin aldolase	dihydroneopterin aldolase, putative | chr3:3715071-3715904 REVERSE
BnaAnng09490D	-1.58543	25.9	C1-metabolism.dihydroneopterin aldolase	dihydroneopterin aldolase, putative | chr3:3715071-3715904 REVERSE
BnaC05g41450D	-5.14117	25.9	C1-metabolism.dihydroneopterin aldolase	dihydroneopterin aldolase, putative | chr3:3715071-3715904 REVERSE
BnaA01g00380D	-2.97628	26.1	misc.misc2	formamidase, putative / formamide amidohydrolase, putative | chr4:17646408-17648684 FORWARD
BnaA01g00390D	-2.15606	26.1	misc.misc2	formamidase, putative / formamide amidohydrolase, putative | chr4:17646408-17648684 FORWARD
BnaA01g14950D	-1.3828	26.1	misc.misc2	Symbols: ATQC, QC, QCT | QC (GLUTAMINYL CYCLASE); catalytic/ glutaminyl-peptide cyclotransferase | chr4:13099818-13102578 REVERSE
BnaA01g23700D	-2.19338	26.1	misc.misc2	dienelactone hydrolase family protein | chr3:8473775-8475858 FORWARD
BnaA02g05170D	-1.91329	26.1	misc.misc2	Symbols: AAO1, AO1, ATAO, ATAO1 | AAO1 (ARABIDOPSIS ALDEHYDE OXIDASE 1); aldehyde oxidase/ indole-3-acetaldehyde oxidase | chr5:7116738-7122670 FORWARD
BnaA03g42310D	-2.1622	26.1	misc.misc2	catalytic/ epoxide hydrolase | chr4:9045624-9047449 REVERSE
BnaA05g35220D	-1.04055	26.1	misc.misc2	dienelactone hydrolase family protein | chr2:13805519-13807536 REVERSE
BnaA06g23370D	-1.03433	26.1	misc.misc2	2-nitropropane dioxygenase family / NPD family | chr5:25697354-25699212 REVERSE
BnaA07g16880D	-2.33658	26.1	misc.misc2	oxidoreductase, zinc-binding dehydrogenase family protein | chr3:20932791-20934540 REVERSE
BnaA09g17610D	-4.01977	26.1	misc.misc2	nodulin-related / integral membrane family protein | chr5:18388291-18390420 FORWARD
BnaA09g31660D	-1.5629	26.1	misc.misc2	epoxide hydrolase, putative | chr3:18945025-18946621 REVERSE
BnaA09g56810D	-2.16171	26.1	misc.misc2	Symbols: PDF1A, ATDEF1 | PDF1A (PEPTIDE DEFORMYLASE 1A); peptide deformylase | chr1:5294629-5295797 FORWARD
BnaA10g14600D	-1.09702	26.1	misc.misc2	Symbols: AAO1, AO1, ATAO, ATAO1 | AAO1 (ARABIDOPSIS ALDEHYDE OXIDASE 1); aldehyde oxidase/ indole-3-acetaldehyde oxidase | chr5:7116738-7122670 FORWARD
BnaAnng02030D	-1.60296	26.1	misc.misc2	dienelactone hydrolase family protein | chr1:13026289-13027667 FORWARD
BnaC01g01360D	-1.40239	26.1	misc.misc2	formamidase, putative / formamide amidohydrolase, putative | chr4:17646408-17648684 FORWARD
BnaC01g30540D	-1.39497	26.1	misc.misc2	dienelactone hydrolase family protein | chr3:8473775-8475858 FORWARD
BnaC06g08540D	-1.49243	26.1	misc.misc2	dienelactone hydrolase family protein | chr1:13026289-13027667 FORWARD
BnaC06g15940D	-1.99474	26.1	misc.misc2	oxidoreductase, zinc-binding dehydrogenase family protein | chr3:20932791-20934540 REVERSE
BnaC06g24190D	-2.48425	26.1	misc.misc2	oxidoreductase family protein | chr1:27167363-27169717 REVERSE
BnaC07g07910D	-1.35347	26.1	misc.misc2	dienelactone hydrolase family protein | chr3:8473775-8475858 FORWARD
BnaC08g22490D	-4.89724	26.1	misc.misc2	epoxide hydrolase, putative | chr3:18945025-18946621 REVERSE
BnaC08g38900D	-2.17245	26.1	misc.misc2	Symbols: PDF1A, ATDEF1 | PDF1A (PEPTIDE DEFORMYLASE 1A); peptide deformylase | chr1:5294629-5295797 FORWARD
BnaC09g18780D	-2.41242	26.1	misc.misc2	nodulin-related / integral membrane family protein | chr5:18388291-18390420 FORWARD
BnaC09g33690D	-1.235	26.1	misc.misc2	bis(5'-adenosyl)-triphosphatase, putative | chr5:23558114-23559353 REVERSE
BnaC09g36910D	-1.2251	26.1	misc.misc2	Symbols: AAO1, AO1, ATAO, ATAO1 | AAO1 (ARABIDOPSIS ALDEHYDE OXIDASE 1); aldehyde oxidase/ indole-3-acetaldehyde oxidase | chr5:7116738-7122670 FORWARD
BnaC01g23690D	1.75857	26.1	misc.misc2	epoxide hydrolase, putative | chr3:18945025-18946621 REVERSE
BnaC09g18790D	1.32654	26.1	misc.misc2	nodulin-related / integral membrane family protein | chr5:18388291-18390420 FORWARD
BnaC05g09920D	1.98159	26.1	misc.misc2	Symbols: AAPT1, ATAAPT1 | AAPT1 (AMINOALCOHOLPHOSPHOTRANSFERASE 1); phosphatidyltransferase/ phosphotransferase, for other substituted phosphate groups | chr1:4638514-4642104 REVERSE
BnaA02g27520D	-2.16294	26.1	misc.misc2	Symbols: AAPT2, ATAAPT2 | AAPT2 (AMINOALCOHOLPHOSPHOTRANSFERASE); phosphatidyltransferase/ phosphotransferase, for other substituted phosphate groups | chr3:9295373-9298746 FORWARD
BnaA03g41090D	-1.71687	26.1	misc.misc2	epoxide hydrolase, putative | chr3:18945025-18946621 REVERSE
BnaA07g06370D	3.15579	26.1	misc.misc2	dienelactone hydrolase family protein | chr3:8457778-8459691 REVERSE
BnaA07g23150D	-1.68806	26.1	misc.misc2	oxidoreductase family protein | chr1:27167363-27169717 REVERSE
BnaA10g19170D	-1.23114	26.1	misc.misc2	Symbols: PDF1B, DEF2, ATDEF2 | PDF1B (PEPTIDE DEFORMYLASE 1B); iron ion binding / peptide deformylase | chr5:4726641-4728746 REVERSE
BnaC01g30550D	-1.09954	26.1	misc.misc2	dienelactone hydrolase family protein | chr3:8473775-8475858 FORWARD
BnaC03g49940D	2.46977	26.1	misc.misc2	2-nitropropane dioxygenase family / NPD family | chr5:25697354-25699212 REVERSE
BnaC04g12290D	-1.07979	26.1	misc.misc2	dienelactone hydrolase family protein | chr2:13805519-13807536 REVERSE
BnaC07g33390D	-1.17085	26.1	misc.misc2	catalytic/ epoxide hydrolase | chr4:9045624-9047449 REVERSE
BnaC08g30830D	-1.35736	26.1	misc.misc2	Symbols: CYP77A5P | CYP77A5P; catalytic | chr3:6261905-6264309 FORWARD
BnaC08g47760D	-8.12928	26.1	misc.misc2	catalytic/ epoxide hydrolase | chr4:9045624-9047449 REVERSE
BnaA08g20830D	-2.09954	26.11	misc.alcohol dehydrogenases	alcohol dehydrogenase, putative | chr1:7922428-7924944 FORWARD
BnaC01g13540D	1.36515	26.11	misc.alcohol dehydrogenases	alcohol dehydrogenase, putative | chr4:11711336-11714228 REVERSE
BnaA05g17940D	-7.59495	26.11	misc.alcohol dehydrogenases	alcohol dehydrogenase, putative | chr1:11869825-11872926 REVERSE
BnaC08g05970D	-1.32949	26.11	misc.alcohol dehydrogenases	alcohol dehydrogenase, putative | chr4:11711336-11714228 REVERSE
BnaCnng45600D	-1.00449	26.11	misc.alcohol dehydrogenases	alcohol dehydrogenase, putative | chr5:16894009-16897620 FORWARD
BnaA01g00410D	-6.53571	26.12	misc.peroxidases	peroxidase 50 (PER50) (P50) (PRXR2) | chr4:17631562-17633249 FORWARD
BnaA01g11800D	-2.51564	26.12	misc.peroxidases	Symbols: PRXR1 | PRXR1; electron carrier/ heme binding / peroxidase | chr4:11646174-11648462 REVERSE
BnaA03g52000D	-1.63217	26.12	misc.peroxidases	Symbols: APX6 | APX6; L-ascorbate peroxidase/ heme binding / peroxidase | chr4:15602721-15605400 FORWARD
BnaA04g09990D	-5.55459	26.12	misc.peroxidases	peroxidase, putative | chr5:16059509-16061043 REVERSE
BnaA04g29190D	-2.2901	26.12	misc.peroxidases	peroxidase 21 (PER21) (P21) (PRXR5) | chr2:15597921-15600077 REVERSE
BnaA05g19460D	-3.13132	26.12	misc.peroxidases	peroxidase 30 (PER30) (P30) (PRXR9) | chr3:7673276-7674839 FORWARD
BnaA05g22930D	-2.02086	26.12	misc.peroxidases	peroxidase, putative | chr3:5820961-5823199 FORWARD
BnaA08g11780D	-1.73423	26.12	misc.peroxidases	peroxidase, putative | chr4:16084828-16086296 FORWARD
BnaA09g42650D	-2.62648	26.12	misc.peroxidases	peroxidase 17 (PER17) (P17) | chr2:9513219-9514535 FORWARD
BnaA09g42660D	-4.16027	26.12	misc.peroxidases	peroxidase 17 (PER17) (P17) | chr2:9513219-9514535 FORWARD
BnaA10g03280D	-5.0099	26.12	misc.peroxidases	peroxidase, putative | chr1:1525601-1527234 REVERSE
BnaC01g13370D	-2.58397	26.12	misc.peroxidases	Symbols: PRXR1 | PRXR1; electron carrier/ heme binding / peroxidase | chr4:11646174-11648462 REVERSE
BnaC01g31810D	-1.65711	26.12	misc.peroxidases	peroxidase 30 (PER30) (P30) (PRXR9) | chr3:7673276-7674839 FORWARD
BnaC05g03290D	-4.26475	26.12	misc.peroxidases	peroxidase, putative | chr1:1525601-1527234 REVERSE
BnaC07g43770D	-2.0265	26.12	misc.peroxidases	Symbols: APX6 | APX6; L-ascorbate peroxidase/ heme binding / peroxidase | chr4:15602721-15605400 FORWARD
BnaC09g08690D	-2.23432	26.12	misc.peroxidases	peroxidase 32 (PER32) (P32) (PRXR3) | chr3:13526097-13529997 REVERSE
BnaCnng14900D	-1.83038	26.12	misc.peroxidases	peroxidase, putative | chr4:16084828-16086296 FORWARD
BnaCnng24390D	-5.34696	26.12	misc.peroxidases	peroxidase, putative | chr5:16059509-16061043 REVERSE
BnaC09g48850D	1.69	26.12	misc.peroxidases	peroxidase, putative | chr5:2079955-2081684 REVERSE
BnaA10g24240D	8.835	26.12	misc.peroxidases	peroxidase, putative | chr5:2077420-2079005 REVERSE
BnaC02g02350D	3.08746	26.12	misc.peroxidases	peroxidase, putative | chr5:1578951-1580875 REVERSE
BnaC03g33490D	7.71425	26.12	misc.peroxidases	peroxidase, putative | chr3:901841-903411 REVERSE
BnaA02g04550D	4.32193	26.12	misc.peroxidases	peroxidase, putative | chr5:6720384-6722475 REVERSE
BnaA03g52510D	-2.14279	26.12	misc.peroxidases	peroxidase, putative | chr4:16084828-16086296 FORWARD
BnaA05g09700D	-8.42347	26.12	misc.peroxidases	peroxidase, putative | chr2:14384896-14386669 FORWARD
BnaA07g23450D	1.49412	26.12	misc.peroxidases	peroxidase 12 (PER12) (P12) (PRXR6) | chr1:26964249-26966688 FORWARD
BnaC02g09490D	-9.2127	26.12	misc.peroxidases	peroxidase, putative | chr5:7426314-7427964 FORWARD
BnaC04g47720D	-3.47393	26.12	misc.peroxidases	electron carrier/ heme binding / peroxidase | chr2:17296812-17298731 REVERSE
BnaC07g44240D	-1.53952	26.12	misc.peroxidases	peroxidase, putative | chr4:16084828-16086296 FORWARD
BnaC08g35130D	-1.87597	26.12	misc.peroxidases	peroxidase 17 (PER17) (P17) | chr2:9513219-9514535 FORWARD
BnaC09g01650D	-2.14785	26.12	misc.peroxidases	peroxidase, putative | chr3:10518070-10519166 FORWARD
BnaC09g25420D	-2.85561	26.12	misc.peroxidases	peroxidase, putative | chr4:5598115-5600312 REVERSE
BnaC09g50000D	2.91374	26.12	misc.peroxidases	peroxidase, putative | chr5:1578951-1580875 REVERSE
BnaCnng51060D	2.19841	26.12	misc.peroxidases	peroxidase, putative | chr5:25659306-25661002 REVERSE
BnaA03g27450D	-1.5447	26.13	misc.acid and other phosphatases	5'-AMP-activated protein kinase beta-1 subunit-related | chr3:198679-201742 REVERSE
BnaA03g49480D	-1.20757	26.13	misc.acid and other phosphatases	acid phosphatase class B family protein | chr4:14422152-14423603 REVERSE
BnaA04g15430D	-2.09111	26.13	misc.acid and other phosphatases	Symbols: PAP1, ATPAP1, PAP12, ATPAP12 | PAP12 (PURPLE ACID PHOSPHATASE 12); acid phosphatase/ protein serine/threonine phosphatase | chr2:11621222-11623618 REVERSE
BnaA05g00970D	-1.09079	26.13	misc.acid and other phosphatases	Symbols: POL | POL (poltergeist); protein serine/threonine phosphatase | chr2:19277903-19281760 REVERSE
BnaA05g20480D	-1.07757	26.13	misc.acid and other phosphatases	phosphoprotein phosphatase | chr3:6808585-6809508 REVERSE
BnaA05g30450D	-1.41117	26.13	misc.acid and other phosphatases	Symbols: ATPAP15, PAP15 | PAP15 (PURPLE ACID PHOSPHATASE 15); acid phosphatase/ protein serine/threonine phosphatase | chr3:2255710-2258005 REVERSE
BnaA06g22560D	-1.80562	26.13	misc.acid and other phosphatases	Symbols: ATPAP29, PAP29 | ATPAP29 (ARABIDOPSIS THALIANA PURPLE ACID PHOSPHATASE 29); acid phosphatase/ protein serine/threonine phosphatase | chr5:25328119-25329799 FORWARD
BnaA07g12610D	-2.51663	26.13	misc.acid and other phosphatases	phosphatidic acid phosphatase-related / PAP2-related | chr5:26534616-26536045 FORWARD
BnaA07g22920D	-3.08031	26.13	misc.acid and other phosphatases	acid phosphatase survival protein SurE, putative | chr1:27423385-27426135 REVERSE
BnaA07g30540D	-2.68761	26.13	misc.acid and other phosphatases	phosphatase | chr1:27464572-27466256 REVERSE
BnaA07g37220D	-4.11974	26.13	misc.acid and other phosphatases	purple acid phosphatase family protein | chr1:8840402-8842317 REVERSE
BnaA08g05220D	-1.27195	26.13	misc.acid and other phosphatases	Symbols: ATPAP23, PAP23 | PAP23 (PURPLE ACID PHOSPHATASE 23); acid phosphatase/ protein serine/threonine phosphatase | chr4:7957072-7958919 REVERSE
BnaA08g05520D	-2.72687	26.13	misc.acid and other phosphatases	acid phosphatase survival protein SurE, putative | chr4:8538586-8541899 FORWARD
BnaA08g07270D	-1.06865	26.13	misc.acid and other phosphatases	Symbols: ATPAP26, PAP26 | PAP26 (PURPLE ACID PHOSPHATASE 26); acid phosphatase/ protein serine/threonine phosphatase | chr5:13108154-13111631 REVERSE
BnaA08g13480D	-1.58496	26.13	misc.acid and other phosphatases	acid phosphatase class B family protein | chr4:14422152-14423603 REVERSE
BnaA08g31430D	-4.71052	26.13	misc.acid and other phosphatases	Symbols: PAP3, ATPAP3 | PAP3 (PURPLE ACID PHOSPHATASE 3); acid phosphatase/ protein serine/threonine phosphatase | chr1:5058680-5061136 FORWARD
BnaA09g49110D	-1.97362	26.13	misc.acid and other phosphatases	SIT4 phosphatase-associated family protein | chr1:2477157-2483138 FORWARD
BnaA10g11170D	-3.90304	26.13	misc.acid and other phosphatases	Symbols: ATPAP28, PAP28 | PAP28 (PURPLE ACID PHOSPHATASE 28); acid phosphatase/ protein serine/threonine phosphatase | chr5:23149880-23151370 FORWARD
BnaA10g20770D	-1.54382	26.13	misc.acid and other phosphatases	NLI interacting factor (NIF) family protein | chr5:3821803-3823843 REVERSE
BnaA10g29770D	-3.59323	26.13	misc.acid and other phosphatases	acid phosphatase/ oxidoreductase/ transition metal ion binding | chr5:4876515-4885821 FORWARD
BnaAnng16610D	-2.47471	26.13	misc.acid and other phosphatases	Symbols: ATPAP16, PAP16 | PAP16 (PURPLE ACID PHOSPHATASE 16); acid phosphatase/ protein serine/threonine phosphatase | chr3:3137362-3139056 REVERSE
BnaC03g18120D	-3.26534	26.13	misc.acid and other phosphatases	Symbols: PAP13, ATPAP13 | purple acid phosphatase (PAP13) | chr2:13895825-13898277 FORWARD
BnaC03g32470D	-1.76278	26.13	misc.acid and other phosphatases	5'-AMP-activated protein kinase beta-1 subunit-related | chr3:198679-201742 REVERSE
BnaC03g46360D	-2.19033	26.13	misc.acid and other phosphatases	Symbols: PAP10, ATPAP10 | PAP10 (PURPLE ACID PHOSPHATASE 10); acid phosphatase/ protein serine/threonine phosphatase | chr2:7120419-7122832 REVERSE
BnaC03g51090D	-3.25373	26.13	misc.acid and other phosphatases	Symbols: ATPAP29, PAP29 | ATPAP29 (ARABIDOPSIS THALIANA PURPLE ACID PHOSPHATASE 29); acid phosphatase/ protein serine/threonine phosphatase | chr5:25328119-25329799 FORWARD
BnaC04g38420D	-1.76017	26.13	misc.acid and other phosphatases	Symbols: PAP1, ATPAP1, PAP12, ATPAP12 | PAP12 (PURPLE ACID PHOSPHATASE 12); acid phosphatase/ protein serine/threonine phosphatase | chr2:11621222-11623618 REVERSE
BnaC05g48240D	-2.12017	26.13	misc.acid and other phosphatases	Symbols: LPP3, ATLPP3 | LPP3 (LIPID PHOSPHATE PHOSPHATASE 3); phosphatidate phosphatase | chr3:551351-554671 FORWARD
BnaC06g34050D	-1.95401	26.13	misc.acid and other phosphatases	acid phosphatase survival protein SurE, putative | chr1:27423385-27426135 REVERSE
BnaC06g43820D	-3.98089	26.13	misc.acid and other phosphatases	phosphatase | chr1:27464572-27466256 REVERSE
BnaC07g10880D	-2.27246	26.13	misc.acid and other phosphatases	purple acid phosphatase family protein | chr1:8840402-8842317 REVERSE
BnaC08g39060D	-1.65789	26.13	misc.acid and other phosphatases	Symbols: ATPAP2, ATLPP2, LPP2 | LPP2 (LIPID PHOSPHATE PHOSPHATASE 2); acid phosphatase/ phosphatidate phosphatase | chr1:5187626-5189673 FORWARD
BnaC08g40040D	-1.04238	26.13	misc.acid and other phosphatases	calcineurin-like phosphoesterase family protein | chr1:4753145-4755580 REVERSE
BnaC08g40180D	-2.02769	26.13	misc.acid and other phosphatases	calcineurin-like phosphoesterase family protein | chr1:4715394-4718235 REVERSE
BnaC08g43410D	-1.03496	26.13	misc.acid and other phosphatases	SIT4 phosphatase-associated family protein | chr1:2477157-2483138 FORWARD
BnaC09g53400D	-1.88878	26.13	misc.acid and other phosphatases	Symbols: ATPAP28, PAP28 | PAP28 (PURPLE ACID PHOSPHATASE 28); acid phosphatase/ protein serine/threonine phosphatase | chr5:23149880-23151370 FORWARD
BnaC07g19130D	1.46999	26.13	misc.acid and other phosphatases	NLI interacting factor (NIF) family protein | chr5:18825103-18829221 FORWARD
BnaC04g05450D	2.38535	26.13	misc.acid and other phosphatases	acid phosphatase class B family protein | chr2:16663017-16664538 REVERSE
BnaA02g21590D	1.53785	26.13	misc.acid and other phosphatases	hydrolase/ protein serine/threonine phosphatase | chr4:7093542-7099697 REVERSE
BnaC07g21340D	2.54655	26.13	misc.acid and other phosphatases	Symbols: PAP8, ATPAP8 | PAP8 (PURPLE ACID PHOSPHATASE 8); acid phosphatase/ protein serine/threonine phosphatase | chr2:396768-399208 REVERSE
BnaC05g07350D	1.4762	26.13	misc.acid and other phosphatases	histidine acid phosphatase family protein | chr1:3205741-3208598 FORWARD
BnaA05g20440D	1.06592	26.13	misc.acid and other phosphatases	Symbols: ATPAP18, PAP18 | PAP18 (PURPLE ACID PHOSPHATASE 18); acid phosphatase/ protein serine/threonine phosphatase | chr3:7157906-7160417 FORWARD
BnaCnng23820D	3.13084	26.13	misc.acid and other phosphatases	hydrolase/ protein serine/threonine phosphatase | chr4:7093542-7099697 REVERSE
BnaCnng03060D	1.55945	26.13	misc.acid and other phosphatases	phosphatidic acid phosphatase-related / PAP2-related | chr5:721867-723400 FORWARD
BnaA06g05800D	1.74263	26.13	misc.acid and other phosphatases	histidine acid phosphatase family protein | chr1:3205741-3208598 FORWARD
BnaC04g26670D	1.92022	26.13	misc.acid and other phosphatases	phosphatidic acid phosphatase-related / PAP2-related | chr3:20005733-20008254 FORWARD
BnaA05g22460D	2.94753	26.13	misc.acid and other phosphatases	Symbols: ATACP5, ATPAP17, PAP17 | PAP17; acid phosphatase/ phosphatase/ protein serine/threonine phosphatase | chr3:6089605-6091231 FORWARD
BnaA04g04400D	2.07712	26.13	misc.acid and other phosphatases	phosphatidic acid phosphatase-related / PAP2-related | chr3:20005733-20008254 FORWARD
BnaC05g35720D	7.90689	26.13	misc.acid and other phosphatases	Symbols: ATACP5, ATPAP17, PAP17 | PAP17; acid phosphatase/ phosphatase/ protein serine/threonine phosphatase | chr3:6089605-6091231 FORWARD
BnaA01g14240D	-1.09325	26.13	misc.acid and other phosphatases	Symbols: ATPAP24, PAP24 | PAP24 (PURPLE ACID PHOSPHATASE 24); acid phosphatase/ protein serine/threonine phosphatase | chr4:12811479-12814449 REVERSE
BnaA01g14490D	-3.60334	26.13	misc.acid and other phosphatases	acid phosphatase, putative | chr4:12901534-12903125 REVERSE
BnaA05g05670D	1.27069	26.13	misc.acid and other phosphatases	acid phosphatase class B family protein | chr2:16663017-16664538 REVERSE
BnaA05g33490D	-2.42227	26.13	misc.acid and other phosphatases	Symbols: LPP3, ATLPP3 | LPP3 (LIPID PHOSPHATE PHOSPHATASE 3); phosphatidate phosphatase | chr3:551351-554671 FORWARD
BnaA06g34460D	2.35112	26.13	misc.acid and other phosphatases	Symbols: PAP7, ATPAP7 | PAP7 (PURPLE ACID PHOSPHATASE 7); acid phosphatase/ protein serine/threonine phosphatase | chr2:391423-394032 REVERSE
BnaA06g35990D	1.98023	26.13	misc.acid and other phosphatases	NLI interacting factor (NIF) family protein | chr5:18825103-18829221 FORWARD
BnaA07g37470D	-1.13636	26.13	misc.acid and other phosphatases	5-azacytidine resistance protein -related | chr5:26638790-26640816 REVERSE
BnaA08g13470D	-2.24316	26.13	misc.acid and other phosphatases	acid phosphatase class B family protein | chr4:14423662-14424882 REVERSE
BnaA08g24200D	1.87147	26.13	misc.acid and other phosphatases	calcineurin-like phosphoesterase family protein | chr1:4753145-4755580 REVERSE
BnaA08g29070D	-1.85766	26.13	misc.acid and other phosphatases	Symbols: PLL5 | PLL5; catalytic/ protein serine/threonine phosphatase | chr1:2349097-2351692 FORWARD
BnaA09g33200D	2.62263	26.13	misc.acid and other phosphatases	Symbols: ATPAP22, PAP22 | PAP22 (PURPLE ACID PHOSPHATASE 22); acid phosphatase/ protein serine/threonine phosphatase | chr3:19573944-19576977 REVERSE
BnaA09g33210D	8.93664	26.13	misc.acid and other phosphatases	Symbols: ATPAP22, PAP22 | PAP22 (PURPLE ACID PHOSPHATASE 22); acid phosphatase/ protein serine/threonine phosphatase | chr3:19573944-19576977 REVERSE
BnaA09g44850D	4.30986	26.13	misc.acid and other phosphatases	phosphatase | chr1:6090560-6092027 REVERSE
BnaA09g45250D	-2.01106	26.13	misc.acid and other phosphatases	Symbols: ATPAP2, ATLPP2, LPP2 | LPP2 (LIPID PHOSPHATE PHOSPHATASE 2); acid phosphatase/ phosphatidate phosphatase | chr1:5187626-5189673 FORWARD
BnaA10g04970D	-1.24288	26.13	misc.acid and other phosphatases	Symbols: PLL5 | PLL5; catalytic/ protein serine/threonine phosphatase | chr1:2349097-2351692 FORWARD
BnaAnng30500D	-1.04265	26.13	misc.acid and other phosphatases	phosphatase | chr1:27464572-27466256 REVERSE
BnaC03g19360D	-1.5323	26.13	misc.acid and other phosphatases	Symbols: ATEYA | ATEYA (Arabidopsis thaliana EYES ABSENT homolog); protein tyrosine phosphatase, metal-dependent | chr2:14866832-14868860 REVERSE
BnaC03g39290D	1.37064	26.13	misc.acid and other phosphatases	phosphatidic acid phosphatase-related / PAP2-related | chr3:5351071-5353728 FORWARD
BnaC05g42920D	-2.15666	26.13	misc.acid and other phosphatases	Symbols: ATPAP16, PAP16 | PAP16 (PURPLE ACID PHOSPHATASE 16); acid phosphatase/ protein serine/threonine phosphatase | chr3:3137362-3139056 REVERSE
BnaC08g08870D	-1.03288	26.13	misc.acid and other phosphatases	Symbols: ATPAP23, PAP23 | PAP23 (PURPLE ACID PHOSPHATASE 23); acid phosphatase/ protein serine/threonine phosphatase | chr4:7957072-7958919 REVERSE
BnaC08g16330D	-4.30237	26.13	misc.acid and other phosphatases	Symbols: PAP3, ATPAP3 | PAP3 (PURPLE ACID PHOSPHATASE 3); acid phosphatase/ protein serine/threonine phosphatase | chr1:5058680-5061136 FORWARD
BnaC08g43690D	-2.93074	26.13	misc.acid and other phosphatases	acid phosphatase class B family protein | chr1:1042362-1043864 REVERSE
BnaA01g29440D	-8.22882	26.14	misc.oxygenases	oxidoreductase, 2OG-Fe(II) oxygenase family protein | chr1:9771793-9773345 FORWARD
BnaA05g21940D	-1.05114	26.14	misc.oxygenases	oxidoreductase, 2OG-Fe(II) oxygenase family protein | chr3:6237930-6240605 REVERSE
BnaAnng11120D	-1.6199	26.14	misc.oxygenases	oxidoreductase, 2OG-Fe(II) oxygenase family protein | chr3:6237930-6240605 REVERSE
BnaC03g40440D	-1.63952	26.14	misc.oxygenases	oxidoreductase, 2OG-Fe(II) oxygenase family protein | chr3:6237930-6240605 REVERSE
BnaC05g35150D	-1.42899	26.14	misc.oxygenases	oxidoreductase, 2OG-Fe(II) oxygenase family protein | chr3:6237930-6240605 REVERSE
BnaC05g51970D	-4.07039	26.14	misc.oxygenases	oxidoreductase, 2OG-Fe(II) oxygenase family protein | chr1:9771793-9773345 FORWARD
BnaA07g22570D	1.24696	26.14	misc.oxygenases	pathogen-responsive alpha-dioxygenase, putative | chr1:27703944-27707514 REVERSE
BnaC06g34480D	1.93817	26.14	misc.oxygenases	pathogen-responsive alpha-dioxygenase, putative | chr1:27703944-27707514 REVERSE
BnaCnng62060D	-3.4489	26.14	misc.oxygenases	oxidoreductase, 2OG-Fe(II) oxygenase family protein | chr1:9771793-9773345 FORWARD
BnaA01g29500D	-1.57541	26.16	misc.myrosinases-lectin-jacalin	GDSL-motif lipase/hydrolase family protein | chr3:4732893-4734609 FORWARD
BnaA03g00480D	-1.74753	26.16	misc.myrosinases-lectin-jacalin	legume lectin family protein | chr5:32832-34326 FORWARD
BnaA03g07130D	-1.95559	26.16	misc.myrosinases-lectin-jacalin	curculin-like (mannose-binding) lectin family protein | chr5:6127797-6129285 FORWARD
BnaA03g18540D	-1.59908	26.16	misc.myrosinases-lectin-jacalin	Symbols: JAL22 | JAL22 (JACALIN-RELATED LECTIN 22) | chr2:16414073-16416815 REVERSE
BnaA06g01420D	-1.79763	26.16	misc.myrosinases-lectin-jacalin	GDSL-motif lipase, putative | chr1:20167629-20169600 FORWARD
BnaA06g01430D	-2.55267	26.16	misc.myrosinases-lectin-jacalin	myrosinase-associated protein, putative | chr1:20161670-20163743 REVERSE
BnaA06g01990D	-2.56478	26.16	misc.myrosinases-lectin-jacalin	Symbols: MBP2, MBP1.2, F-ATMBP | MBP2 (MYROSINASE-BINDING PROTEIN 2); sugar binding / thioglucosidase binding | chr1:19345940-19348668 REVERSE
BnaA08g29200D	-1.82272	26.16	misc.myrosinases-lectin-jacalin	GDSL-motif lipase, putative | chr1:20167629-20169600 FORWARD
BnaAnng14010D	-1.89616	26.16	misc.myrosinases-lectin-jacalin	legume lectin family protein | chr5:32832-34326 FORWARD
BnaC01g37130D	-2.28255	26.16	misc.myrosinases-lectin-jacalin	GDSL-motif lipase/hydrolase family protein | chr3:4732893-4734609 FORWARD
BnaC02g03680D	-2.24793	26.16	misc.myrosinases-lectin-jacalin	legume lectin family protein | chr5:32832-34326 FORWARD
BnaC02g21750D	-2.28512	26.16	misc.myrosinases-lectin-jacalin	jacalin lectin family protein | chr1:27475060-27475962 REVERSE
BnaC02g40120D	-1.56492	26.16	misc.myrosinases-lectin-jacalin	Symbols: TGG1, BGLU38 | TGG1 (THIOGLUCOSIDE GLUCOHYDROLASE 1); hydrolase, hydrolyzing O-glycosyl compounds / thioglucosidase | chr5:9079505-9082384 REVERSE
BnaC02g40130D	-2.29068	26.16	misc.myrosinases-lectin-jacalin	Symbols: TGG1, BGLU38 | TGG1 (THIOGLUCOSIDE GLUCOHYDROLASE 1); hydrolase, hydrolyzing O-glycosyl compounds / thioglucosidase | chr5:9079505-9082384 REVERSE
BnaC02g40420D	-1.94186	26.16	misc.myrosinases-lectin-jacalin	Symbols: TGG1, BGLU38 | TGG1 (THIOGLUCOSIDE GLUCOHYDROLASE 1); hydrolase, hydrolyzing O-glycosyl compounds / thioglucosidase | chr5:9079505-9082384 REVERSE
BnaC03g00460D	-2.0477	26.16	misc.myrosinases-lectin-jacalin	legume lectin family protein | chr5:32832-34326 FORWARD
BnaC03g78280D	-2.03855	26.16	misc.myrosinases-lectin-jacalin	GDSL-motif lipase, putative | chr1:20167629-20169600 FORWARD
BnaC04g46230D	-2.36474	26.16	misc.myrosinases-lectin-jacalin	Symbols: JAL22 | JAL22 (JACALIN-RELATED LECTIN 22) | chr2:16414073-16416815 REVERSE
BnaC06g06770D	-9.52487	26.16	misc.myrosinases-lectin-jacalin	GDSL-motif lipase, putative | chr1:20167629-20169600 FORWARD
BnaC06g30120D	-1.83167	26.16	misc.myrosinases-lectin-jacalin	Symbols: JAL22 | JAL22 (JACALIN-RELATED LECTIN 22) | chr2:16414073-16416815 REVERSE
BnaCnng53320D	-1.56584	26.16	misc.myrosinases-lectin-jacalin	Symbols: TGG1, BGLU38 | TGG1 (THIOGLUCOSIDE GLUCOHYDROLASE 1); hydrolase, hydrolyzing O-glycosyl compounds / thioglucosidase | chr5:9079505-9082384 REVERSE
BnaCnng69940D	-1.65804	26.16	misc.myrosinases-lectin-jacalin	Symbols: JAL22 | JAL22 (JACALIN-RELATED LECTIN 22) | chr2:16414073-16416815 REVERSE
BnaA04g00910D	2.0972	26.16	misc.myrosinases-lectin-jacalin	Symbols: AtPP2-A13 | AtPP2-A13 (Arabidopsis thaliana phloem protein 2-A13); carbohydrate binding | chr3:22602910-22604578 FORWARD
BnaC08g19180D	1.64156	26.16	misc.myrosinases-lectin-jacalin	jacalin lectin family protein | chr1:6816702-6819542 REVERSE
BnaA08g21950D	1.44786	26.16	misc.myrosinases-lectin-jacalin	jacalin lectin family protein | chr1:6816702-6819542 REVERSE
BnaA01g28080D	2.70044	26.16	misc.myrosinases-lectin-jacalin	Symbols: ATMLP-470, NSP1, ATNSP1 | NSP1 (NITRILE SPECIFIER PROTEIN 1) | chr3:5566086-5568545 FORWARD
BnaA01g28810D	-2.68956	26.16	misc.myrosinases-lectin-jacalin	legume lectin family protein | chr3:5624377-5625470 REVERSE
BnaA02g16250D	-4.48543	26.16	misc.myrosinases-lectin-jacalin	jacalin lectin family protein | chr1:27475060-27475962 REVERSE
BnaA04g23150D	-2.65943	26.16	misc.myrosinases-lectin-jacalin	Symbols: JAL22 | JAL22 (JACALIN-RELATED LECTIN 22) | chr2:16414073-16416815 REVERSE
BnaA04g23170D	-1.98736	26.16	misc.myrosinases-lectin-jacalin	Symbols: JAL22 | JAL22 (JACALIN-RELATED LECTIN 22) | chr2:16414073-16416815 REVERSE
BnaA06g37520D	-2.90277	26.16	misc.myrosinases-lectin-jacalin	Symbols: MBP2, MBP1.2, F-ATMBP | MBP2 (MYROSINASE-BINDING PROTEIN 2); sugar binding / thioglucosidase binding | chr1:19345940-19348668 REVERSE
BnaA07g34420D	-2.03902	26.16	misc.myrosinases-lectin-jacalin	curculin-like (mannose-binding) lectin family protein | chr1:29636955-29638552 REVERSE
BnaA10g10660D	-4.85798	26.16	misc.myrosinases-lectin-jacalin	Symbols: MBP2, MBP1.2, F-ATMBP | MBP2 (MYROSINASE-BINDING PROTEIN 2); sugar binding / thioglucosidase binding | chr1:19345940-19348668 REVERSE
BnaC01g35360D	3.03863	26.16	misc.myrosinases-lectin-jacalin	Symbols: ATMLP-470, NSP1, ATNSP1 | NSP1 (NITRILE SPECIFIER PROTEIN 1) | chr3:5566086-5568545 FORWARD
BnaC03g09050D	-3.40088	26.16	misc.myrosinases-lectin-jacalin	curculin-like (mannose-binding) lectin family protein | chr5:6127797-6129285 FORWARD
BnaC04g46220D	-2.01388	26.16	misc.myrosinases-lectin-jacalin	Symbols: JAL22 | JAL22 (JACALIN-RELATED LECTIN 22) | chr2:16414073-16416815 REVERSE
BnaC06g06760D	-1.8148	26.16	misc.myrosinases-lectin-jacalin	myrosinase-associated protein, putative | chr1:20161670-20163743 REVERSE
BnaC06g39250D	-3.05793	26.16	misc.myrosinases-lectin-jacalin	curculin-like (mannose-binding) lectin family protein | chr1:29636955-29638552 REVERSE
BnaCnng02410D	-1.07487	26.16	misc.myrosinases-lectin-jacalin	Symbols: RLK4 | RLK4 (RECEPTOR-LIKE PROTEIN KINASE 4); protein kinase/ sugar binding | chr4:148814-151686 FORWARD
BnaCnng48420D	-9.64386	26.16	misc.myrosinases-lectin-jacalin	Symbols: TGG1, BGLU38 | TGG1 (THIOGLUCOSIDE GLUCOHYDROLASE 1); hydrolase, hydrolyzing O-glycosyl compounds / thioglucosidase | chr5:9079505-9082384 REVERSE
BnaA08g11490D	-1.17924	26.17	misc.dynamin	Symbols: ADL2, DRP3A | DRP3A (DYNAMIN-RELATED PROTEIN 3A); GTP binding / GTPase/ phosphoinositide binding | chr4:16160935-16166968 FORWARD
BnaC09g14660D	-1.36815	26.17	misc.dynamin	dynamin family protein | chr1:22291582-22293964 FORWARD
BnaC04g22340D	1.00377	26.17	misc.dynamin	Symbols: ADL4, ADLP2, EDR3, DRP1E, ADL1E | ADL1E (ARABIDOPSIS DYNAMIN-LIKE 1E); GTP binding / GTPase | chr3:22244169-22247833 REVERSE
BnaA01g25920D	-1.42845	26.17	misc.dynamin	Symbols: ARC5 | ARC5 (ACCUMULATION AND REPLICATION OF CHLOROPLAST 5); GTP binding / GTPase | chr3:6850371-6855513 REVERSE
BnaA03g52670D	-1.40979	26.17	misc.dynamin	Symbols: ADL2, DRP3A | DRP3A (DYNAMIN-RELATED PROTEIN 3A); GTP binding / GTPase/ phosphoinositide binding | chr4:16160935-16166968 FORWARD
BnaA03g59470D	-1.06211	26.17	misc.dynamin	Symbols: ADL3, CF1 | ADL3 (ARABIDOPSIS DYNAMIN-LIKE 3); GTPase | chr1:21893221-21901086 FORWARD
BnaA07g19020D	1.59724	26.17	misc.dynamin	Symbols: ADL1B | ADL1B (ARABIDOPSIS DYNAMIN-LIKE 1B); GTP binding / GTPase | chr3:22860514-22864153 REVERSE
BnaA09g48230D	1.48474	26.17	misc.dynamin	Symbols: ADL6, DRP2A | ADL6 (DYNAMIN-LIKE PROTEIN 6); GTPase | chr1:3370558-3377463 FORWARD
BnaC04g18630D	-1.19325	26.17	misc.dynamin	Symbols: ADL3, CF1 | ADL3 (ARABIDOPSIS DYNAMIN-LIKE 3); GTPase | chr1:21893221-21901086 FORWARD
BnaA01g14640D	-2.17086	26.18	misc.invertase/pectin methylesterase inhibitor family protein	invertase/pectin methylesterase inhibitor family protein | chr4:12935710-12936658 REVERSE
BnaA03g47250D	-4.33884	26.18	misc.invertase/pectin methylesterase inhibitor family protein	invertase/pectin methylesterase inhibitor family protein | chr4:12935710-12936658 REVERSE
BnaA05g00320D	-2.04672	26.18	misc.invertase/pectin methylesterase inhibitor family protein	invertase/pectin methylesterase inhibitor family protein | chr2:19543991-19544806 REVERSE
BnaA06g04140D	-2.27931	26.18	misc.invertase/pectin methylesterase inhibitor family protein	Symbols: C/VIF1, ATC/VIF1 | C/VIF1 (CELL WALL / VACUOLAR INHIBITOR OF FRUCTOSIDASE 1); enzyme inhibitor/ pectinesterase/ pectinesterase inhibitor | chr1:17681157-17683629 REVERSE
BnaA09g12730D	-3.89308	26.18	misc.invertase/pectin methylesterase inhibitor family protein	invertase/pectin methylesterase inhibitor family protein | chr1:23245886-23246890 REVERSE
BnaA09g12760D	-1.71961	26.18	misc.invertase/pectin methylesterase inhibitor family protein	invertase/pectin methylesterase inhibitor family protein | chr1:23237574-23238512 REVERSE
BnaA09g18750D	-4.63097	26.18	misc.invertase/pectin methylesterase inhibitor family protein	invertase/pectin methylesterase inhibitor family protein | chr2:273917-274820 REVERSE
BnaA10g14750D	-4.91886	26.18	misc.invertase/pectin methylesterase inhibitor family protein	invertase/pectin methylesterase inhibitor family protein | chr5:7025686-7026532 REVERSE
BnaC01g17210D	-2.37117	26.18	misc.invertase/pectin methylesterase inhibitor family protein	invertase/pectin methylesterase inhibitor family protein | chr4:12935710-12936658 REVERSE
BnaC02g34050D	-8.16323	26.18	misc.invertase/pectin methylesterase inhibitor family protein	invertase/pectin methylesterase inhibitor family protein | chr2:273917-274820 REVERSE
BnaC02g46740D	-2.84335	26.18	misc.invertase/pectin methylesterase inhibitor family protein	Symbols: PME1 | PME1 (PECTIN METHYLESTERASE INHIBITOR 1); enzyme inhibitor/ pectinesterase/ pectinesterase inhibitor | chr4:7336497-7337356 FORWARD
BnaC03g49660D	-2.05133	26.18	misc.invertase/pectin methylesterase inhibitor family protein	Symbols: C/VIF2, ATC/VIF2 | C/VIF2 (CELL WALL / VACUOLAR INHIBITOR OF FRUCTOSIDASE 2); enzyme inhibitor/ pectinesterase/ pectinesterase inhibitor | chr5:25831834-25832502 FORWARD
BnaC07g39450D	-4.27373	26.18	misc.invertase/pectin methylesterase inhibitor family protein	invertase/pectin methylesterase inhibitor family protein | chr4:12935710-12936658 REVERSE
BnaC09g06450D	-2.56908	26.18	misc.invertase/pectin methylesterase inhibitor family protein	Symbols: C/VIF2, ATC/VIF2 | C/VIF2 (CELL WALL / VACUOLAR INHIBITOR OF FRUCTOSIDASE 2); enzyme inhibitor/ pectinesterase/ pectinesterase inhibitor | chr5:25831834-25832502 FORWARD
BnaC09g13080D	-1.86813	26.18	misc.invertase/pectin methylesterase inhibitor family protein	invertase/pectin methylesterase inhibitor family protein | chr1:23245886-23246890 REVERSE
BnaC09g13100D	-5.00856	26.18	misc.invertase/pectin methylesterase inhibitor family protein	invertase/pectin methylesterase inhibitor family protein | chr1:23237574-23238512 REVERSE
BnaC09g37120D	-3.19073	26.18	misc.invertase/pectin methylesterase inhibitor family protein	invertase/pectin methylesterase inhibitor family protein | chr5:7025686-7026532 REVERSE
BnaCnng22160D	-2.84951	26.18	misc.invertase/pectin methylesterase inhibitor family protein	Symbols: PME1 | PME1 (PECTIN METHYLESTERASE INHIBITOR 1); enzyme inhibitor/ pectinesterase/ pectinesterase inhibitor | chr4:7336497-7337356 FORWARD
BnaCnng78530D	-2.63801	26.18	misc.invertase/pectin methylesterase inhibitor family protein	invertase/pectin methylesterase inhibitor family protein | chr1:8233997-8234893 REVERSE
BnaCnng76330D	2.2854	26.18	misc.invertase/pectin methylesterase inhibitor family protein	invertase/pectin methylesterase inhibitor family protein | chr3:5844495-5845046 REVERSE
BnaA09g47760D	2.18866	26.18	misc.invertase/pectin methylesterase inhibitor family protein	invertase/pectin methylesterase inhibitor family protein | chr1:3591633-3592411 REVERSE
BnaA09g06030D	2.29875	26.18	misc.invertase/pectin methylesterase inhibitor family protein	invertase/pectin methylesterase inhibitor family protein | chr5:25040649-25041462 FORWARD
BnaC03g51740D	2.45266	26.18	misc.invertase/pectin methylesterase inhibitor family protein	invertase/pectin methylesterase inhibitor family protein / DC 1.2 homolog (FL5-2I22) | chr5:25037426-25038362 FORWARD
BnaC09g05590D	2.51322	26.18	misc.invertase/pectin methylesterase inhibitor family protein	invertase/pectin methylesterase inhibitor family protein | chr5:25040649-25041462 FORWARD
BnaA01g27350D	5.90565	26.18	misc.invertase/pectin methylesterase inhibitor family protein	invertase/pectin methylesterase inhibitor family protein | chr3:5844495-5845046 REVERSE
BnaA02g33370D	2.18193	26.18	misc.invertase/pectin methylesterase inhibitor family protein	invertase/pectin methylesterase inhibitor family protein / DC 1.2 homolog (FL5-2I22) | chr5:25037426-25038362 FORWARD
BnaA06g21790D	2.92528	26.18	misc.invertase/pectin methylesterase inhibitor family protein	invertase/pectin methylesterase inhibitor family protein / DC 1.2 homolog (FL5-2I22) | chr5:25037426-25038362 FORWARD
BnaC05g11140D	5.17105	26.18	misc.invertase/pectin methylesterase inhibitor family protein	enzyme inhibitor/ pectinesterase/ pectinesterase inhibitor | chr1:5137014-5137957 FORWARD
BnaC08g16460D	3.96932	26.18	misc.invertase/pectin methylesterase inhibitor family protein	enzyme inhibitor/ pectinesterase/ pectinesterase inhibitor | chr1:5137014-5137957 FORWARD
BnaA08g31370D	5.2567	26.18	misc.invertase/pectin methylesterase inhibitor family protein	enzyme inhibitor/ pectinesterase/ pectinesterase inhibitor | chr1:5137014-5137957 FORWARD
BnaC03g51710D	6.69328	26.18	misc.invertase/pectin methylesterase inhibitor family protein	invertase/pectin methylesterase inhibitor family protein | chr5:25040649-25041462 FORWARD
BnaA06g21800D	7.11455	26.18	misc.invertase/pectin methylesterase inhibitor family protein	invertase/pectin methylesterase inhibitor family protein | chr5:25040649-25041462 FORWARD
BnaA06g09680D	1.0178	26.18	misc.invertase/pectin methylesterase inhibitor family protein	enzyme inhibitor/ pectinesterase/ pectinesterase inhibitor | chr1:5137014-5137957 FORWARD
BnaA06g35730D	-8.46489	26.18	misc.invertase/pectin methylesterase inhibitor family protein	invertase/pectin methylesterase inhibitor family protein | chr5:19056655-19057191 REVERSE
BnaA09g30040D	1.38842	26.18	misc.invertase/pectin methylesterase inhibitor family protein	invertase/pectin methylesterase inhibitor family protein | chr1:8233997-8234893 REVERSE
BnaC03g10260D	-3.64386	26.18	misc.invertase/pectin methylesterase inhibitor family protein	invertase/pectin methylesterase inhibitor family protein | chr5:7025686-7026532 REVERSE
BnaC03g39870D	1.88554	26.18	misc.invertase/pectin methylesterase inhibitor family protein	invertase/pectin methylesterase inhibitor family protein | chr3:5844495-5845046 REVERSE
BnaC04g00200D	1.40698	26.18	misc.invertase/pectin methylesterase inhibitor family protein	invertase/pectin methylesterase inhibitor family protein | chr2:19543991-19544806 REVERSE
BnaC07g19710D	-2.96578	26.18	misc.invertase/pectin methylesterase inhibitor family protein	invertase/pectin methylesterase inhibitor family protein | chr5:19056655-19057191 REVERSE
BnaC08g14550D	-2.7425	26.18	misc.invertase/pectin methylesterase inhibitor family protein	invertase/pectin methylesterase inhibitor family protein | chr1:3591633-3592411 REVERSE
BnaC08g32510D	1.33388	26.18	misc.invertase/pectin methylesterase inhibitor family protein	invertase/pectin methylesterase inhibitor family protein | chr3:23229749-23230501 FORWARD
BnaCnng76140D	-2.71308	26.18	misc.invertase/pectin methylesterase inhibitor family protein	invertase/pectin methylesterase inhibitor family protein | chr5:7025686-7026532 REVERSE
BnaA02g35610D	-3.04731	26.19	misc.plastocyanin-like	plastocyanin-like domain-containing protein | chr1:27188066-27189244 FORWARD
BnaA03g05390D	-4.87292	26.19	misc.plastocyanin-like	plastocyanin-like domain-containing protein | chr5:4984959-4986239 REVERSE
BnaA03g20930D	-1.98923	26.19	misc.plastocyanin-like	Symbols: UCC2 | UCC2 (UCLACYANIN 2); copper ion binding / electron carrier | chr2:18461906-18463309 REVERSE
BnaA03g51730D	-2.28057	26.19	misc.plastocyanin-like	plastocyanin-like domain-containing protein | chr4:15401640-15402617 FORWARD
BnaA09g53080D	-2.94886	26.19	misc.plastocyanin-like	plastocyanin-like domain-containing protein | chr1:24022285-24023196 REVERSE
BnaAnng24030D	-2.16545	26.19	misc.plastocyanin-like	plastocyanin-like domain-containing protein | chr1:24022285-24023196 REVERSE
BnaC01g06600D	-2.5502	26.19	misc.plastocyanin-like	plastocyanin-like domain-containing protein | chr4:15401640-15402617 FORWARD
BnaC03g06920D	-4.36217	26.19	misc.plastocyanin-like	plastocyanin-like domain-containing protein | chr5:4984959-4986239 REVERSE
BnaC03g25000D	-4.45036	26.19	misc.plastocyanin-like	Symbols: UCC2 | UCC2 (UCLACYANIN 2); copper ion binding / electron carrier | chr2:18461906-18463309 REVERSE
BnaC06g33270D	-1.57599	26.19	misc.plastocyanin-like	plastocyanin-like domain-containing protein | chr1:27188066-27189244 FORWARD
BnaA09g48860D	1.39373	26.19	misc.plastocyanin-like	plastocyanin-like domain-containing protein | chr1:2689016-2690045 FORWARD
BnaC09g42490D	1.79791	26.19	misc.plastocyanin-like	plastocyanin-like domain-containing protein | chr5:4984959-4986239 REVERSE
BnaA01g16530D	3.81184	26.19	misc.plastocyanin-like	plastocyanin-like domain-containing protein | chr4:13750440-13751905 REVERSE
BnaC01g20120D	3.81718	26.19	misc.plastocyanin-like	plastocyanin-like domain-containing protein | chr4:13750440-13751905 REVERSE
BnaC07g50320D	4.6005	26.19	misc.plastocyanin-like	plastocyanin-like domain-containing protein | chr4:13750440-13751905 REVERSE
BnaA10g15190D	3.47221	26.19	misc.plastocyanin-like	Symbols: ATBCB, BCB | ATBCB (ARABIDOPSIS BLUE-COPPER-BINDING PROTEIN); copper ion binding / electron carrier | chr5:6826506-6827629 FORWARD
BnaC09g37560D	2.16847	26.19	misc.plastocyanin-like	Symbols: ATBCB, BCB | ATBCB (ARABIDOPSIS BLUE-COPPER-BINDING PROTEIN); copper ion binding / electron carrier | chr5:6826506-6827629 FORWARD
BnaA02g22370D	-1.00111	26.19	misc.plastocyanin-like	plastocyanin-like domain-containing protein | chr5:4984959-4986239 REVERSE
BnaC07g43510D	-2.2854	26.19	misc.plastocyanin-like	plastocyanin-like domain-containing protein | chr4:15401640-15402617 FORWARD
BnaA01g23220D	-1.48561	26.2	misc.UDP glucosyl and glucoronyl transferases	glycosyltransferase family 14 protein / core-2/I-branching enzyme family protein | chr3:8680877-8683289 REVERSE
BnaA01g30130D	-5.62693	26.2	misc.UDP glucosyl and glucoronyl transferases	transferase/ transferase, transferring glycosyl groups | chr2:15981700-15982917 REVERSE
BnaA01g34010D	-1.86457	26.2	misc.UDP glucosyl and glucoronyl transferases	Symbols: UNE7 | UNE7 (unfertilized embryo sac 7); acetylglucosaminyltransferase/ transferase, transferring glycosyl groups | chr3:911238-913677 REVERSE
BnaA02g02630D	-1.66312	26.2	misc.UDP glucosyl and glucoronyl transferases	Symbols: GAUT14 | GAUT14 (Galacturonosyltransferase 14); polygalacturonate 4-alpha-galacturonosyltransferase/ transferase, transferring glycosyl groups / transferase, transferring hexosyl groups | chr5:5021010-5024742 REVERSE
BnaA02g07000D	-3.03993	26.2	misc.UDP glucosyl and glucoronyl transferases	Symbols: UGT76E2 | UGT76E2 (UDP-GLUCOSYL TRANSFERASE 76E2); UDP-glycosyltransferase/ quercetin 3-O-glucosyltransferase/ quercetin 7-O-glucosyltransferase | chr5:24008983-24010649 REVERSE
BnaA02g07200D	-2.71989	26.2	misc.UDP glucosyl and glucoronyl transferases	glycosyl transferase family 1 protein | chr5:23845198-23847393 FORWARD
BnaA03g09390D	-4.24249	26.2	misc.UDP glucosyl and glucoronyl transferases	Symbols: UGT76E2 | UGT76E2 (UDP-GLUCOSYL TRANSFERASE 76E2); UDP-glycosyltransferase/ quercetin 3-O-glucosyltransferase/ quercetin 7-O-glucosyltransferase | chr5:24008983-24010649 REVERSE
BnaA03g26290D	-2.0391	26.2	misc.UDP glucosyl and glucoronyl transferases	Symbols: GATL6, LGT10 | GATL6; polygalacturonate 4-alpha-galacturonosyltransferase/ transferase, transferring glycosyl groups / transferase, transferring hexosyl groups | chr4:944367-947085 REVERSE
BnaA03g26890D	-2.06485	26.2	misc.UDP glucosyl and glucoronyl transferases	transferase, transferring glycosyl groups | chr4:507717-512782 REVERSE
BnaA03g36440D	-1.13787	26.2	misc.UDP glucosyl and glucoronyl transferases	UDP-glucoronosyl/UDP-glucosyl transferase family protein | chr3:7667027-7668724 FORWARD
BnaA03g36450D	-1.90697	26.2	misc.UDP glucosyl and glucoronyl transferases	UDP-glucoronosyl/UDP-glucosyl transferase family protein | chr3:7667027-7668724 FORWARD
BnaA04g07870D	-4.34577	26.2	misc.UDP glucosyl and glucoronyl transferases	exostosin family protein | chr5:14618107-14620282 FORWARD
BnaA04g08660D	-1.48373	26.2	misc.UDP glucosyl and glucoronyl transferases	ALG6, ALG8 glycosyltransferase family protein | chr5:15398284-15401026 REVERSE
BnaA04g09760D	-1.60113	26.2	misc.UDP glucosyl and glucoronyl transferases	glycosyltransferase family 14 protein / core-2/I-branching enzyme family protein | chr5:16004281-16006740 FORWARD
BnaA04g18440D	-4.04112	26.2	misc.UDP glucosyl and glucoronyl transferases	UDP-glucoronosyl/UDP-glucosyl transferase family protein | chr2:13518211-13520364 FORWARD
BnaA04g22110D	-1.4864	26.2	misc.UDP glucosyl and glucoronyl transferases	Symbols: GAUT7, LGT7 | GAUT7 (GALACTURONOSYLTRANSFERASE 7); polygalacturonate 4-alpha-galacturonosyltransferase/ transferase, transferring glycosyl groups | chr2:16161808-16165775 REVERSE
BnaA05g04210D	-2.47508	26.2	misc.UDP glucosyl and glucoronyl transferases	transferase, transferring glycosyl groups / transferase, transferring hexosyl groups | chr2:18420832-18422839 REVERSE
BnaA05g06940D	-1.95051	26.2	misc.UDP glucosyl and glucoronyl transferases	glycosyltransferase family 14 protein / core-2/I-branching enzyme family protein | chr2:15765784-15767878 FORWARD
BnaA05g07450D	-3.27158	26.2	misc.UDP glucosyl and glucoronyl transferases	UDP-glucoronosyl/UDP-glucosyl transferase family protein | chr2:15529006-15530749 FORWARD
BnaA05g07460D	-6.36442	26.2	misc.UDP glucosyl and glucoronyl transferases	UDP-glucoronosyl/UDP-glucosyl transferase family protein | chr2:15529006-15530749 FORWARD
BnaA05g11170D	-1.25895	26.2	misc.UDP glucosyl and glucoronyl transferases	UDP-glucoronosyl/UDP-glucosyl transferase family protein | chr2:13518211-13520364 FORWARD
BnaA05g14870D	-1.97669	26.2	misc.UDP glucosyl and glucoronyl transferases	glycosyl transferase family 1 protein | chr1:19527842-19531287 FORWARD
BnaA05g19480D	-2.46283	26.2	misc.UDP glucosyl and glucoronyl transferases	Symbols: UGT71B1 | UGT71B1 (UDP-GLUCOSYL TRANSFERASE 71B1); UDP-glycosyltransferase/ quercetin 3-O-glucosyltransferase/ transferase, transferring glycosyl groups | chr3:7664345-7666195 FORWARD
BnaA05g23660D	-2.72102	26.2	misc.UDP glucosyl and glucoronyl transferases	glycosyl transferase family 1 protein | chr3:5393513-5396759 REVERSE
BnaA05g29310D	-4.52048	26.2	misc.UDP glucosyl and glucoronyl transferases	alpha 1,4-glycosyltransferase family protein / glycosyltransferase sugar-binding DXD motif-containing protein | chr3:2753307-2754621 FORWARD
BnaA06g12840D	-2.0616	26.2	misc.UDP glucosyl and glucoronyl transferases	transferase/ transferase, transferring glycosyl groups | chr1:6433574-6436922 FORWARD
BnaA06g13870D	-1.40194	26.2	misc.UDP glucosyl and glucoronyl transferases	glycosyl transferase family 1 protein | chr1:6814793-6816876 FORWARD
BnaA06g15190D	-1.3894	26.2	misc.UDP glucosyl and glucoronyl transferases	exostosin family protein | chr1:7518946-7521504 REVERSE
BnaA06g17940D	-2.37851	26.2	misc.UDP glucosyl and glucoronyl transferases	Symbols: UGT76E11 | UGT76E11 (UDP-GLUCOSYL TRANSFERASE 76E11); UDP-glycosyltransferase/ quercetin 3-O-glucosyltransferase/ quercetin 7-O-glucosyltransferase/ transferase, transferring glycosyl groups | chr3:17192589-17194397 REVERSE
BnaA06g21350D	-1.59933	26.2	misc.UDP glucosyl and glucoronyl transferases	Symbols: GUT1 | GUT1; catalytic/ glucuronoxylan glucuronosyltransferase | chr5:24839178-24841940 REVERSE
BnaA06g40930D	-1.57733	26.2	misc.UDP glucosyl and glucoronyl transferases	Symbols: GAUT3 | GAUT3 (Galacturonosyltransferase 3); polygalacturonate 4-alpha-galacturonosyltransferase/ transferase, transferring glycosyl groups | chr4:17938372-17941558 FORWARD
BnaA07g10530D	-3.67606	26.2	misc.UDP glucosyl and glucoronyl transferases	Symbols: AtUGT85A3 | AtUGT85A3 (UDP-glucosyl transferase 85A3); glucuronosyltransferase/ transcription factor/ transferase, transferring glycosyl groups | chr1:7900387-7902332 REVERSE
BnaA07g14860D	-1.00852	26.2	misc.UDP glucosyl and glucoronyl transferases	glycosyltransferase family 14 protein / core-2/I-branching enzyme family protein | chr5:16004281-16006740 FORWARD
BnaA07g29110D	-1.2378	26.2	misc.UDP glucosyl and glucoronyl transferases	glycosyltransferase family 14 protein / core-2/I-branching enzyme family protein | chr1:26807188-26809504 REVERSE
BnaA07g34390D	-2.55058	26.2	misc.UDP glucosyl and glucoronyl transferases	glycosyl transferase family 1 protein | chr1:29625659-29627989 REVERSE
BnaA07g37770D	-4.87893	26.2	misc.UDP glucosyl and glucoronyl transferases	UDP-glucoronosyl/UDP-glucosyl transferase family protein | chr3:20671115-20673372 FORWARD
BnaA08g06450D	-1.49694	26.2	misc.UDP glucosyl and glucoronyl transferases	exostosin family protein | chr1:12492411-12494544 REVERSE
BnaA08g15970D	-1.50119	26.2	misc.UDP glucosyl and glucoronyl transferases	exostosin family protein | chr4:17867438-17869302 FORWARD
BnaA08g21330D	-1.94039	26.2	misc.UDP glucosyl and glucoronyl transferases	exostosin family protein | chr1:7518946-7521504 REVERSE
BnaA08g22570D	-1.06371	26.2	misc.UDP glucosyl and glucoronyl transferases	Symbols: GAUT11 | GAUT11 (Galacturonosyltransferase 11); polygalacturonate 4-alpha-galacturonosyltransferase | chr1:6395864-6398239 FORWARD
BnaA09g23110D	-1.79288	26.2	misc.UDP glucosyl and glucoronyl transferases	exostosin family protein | chr1:12492411-12494544 REVERSE
BnaA09g33410D	-4.95824	26.2	misc.UDP glucosyl and glucoronyl transferases	Symbols: UGT73D1 | UGT73D1 (UDP-glucosyl transferase 73D1); UDP-glycosyltransferase/ transferase, transferring hexosyl groups | chr3:19697736-19699259 REVERSE
BnaA09g33430D	-2.1388	26.2	misc.UDP glucosyl and glucoronyl transferases	Symbols: UGT73D1 | UGT73D1 (UDP-glucosyl transferase 73D1); UDP-glycosyltransferase/ transferase, transferring hexosyl groups | chr3:19697736-19699259 REVERSE
BnaA09g36940D	-2.30243	26.2	misc.UDP glucosyl and glucoronyl transferases	exostosin family protein | chr3:21339302-21343796 REVERSE
BnaA09g42270D	-2.46297	26.2	misc.UDP glucosyl and glucoronyl transferases	galactosyl transferase GMA12/MNN10 family protein | chr2:9744225-9746292 REVERSE
BnaA10g15500D	-1.62759	26.2	misc.UDP glucosyl and glucoronyl transferases	exostosin family protein | chr5:6646719-6649498 FORWARD
BnaA10g24640D	-1.66745	26.2	misc.UDP glucosyl and glucoronyl transferases	UDP-glucoronosyl/UDP-glucosyl transferase family protein | chr5:1769648-1771515 FORWARD
BnaAnng17780D	-4.5025	26.2	misc.UDP glucosyl and glucoronyl transferases	galactosyltransferase family protein | chr5:25136751-25139946 FORWARD
BnaAnng39200D	-3.63227	26.2	misc.UDP glucosyl and glucoronyl transferases	UDP-glucoronosyl/UDP-glucosyl transferase family protein | chr3:20671115-20673372 FORWARD
BnaC01g01010D	-1.05408	26.2	misc.UDP glucosyl and glucoronyl transferases	exostosin family protein | chr4:17867438-17869302 FORWARD
BnaC01g30240D	-1.47868	26.2	misc.UDP glucosyl and glucoronyl transferases	glycosyltransferase family 14 protein / core-2/I-branching enzyme family protein | chr3:8680877-8683289 REVERSE
BnaC01g38080D	-3.6493	26.2	misc.UDP glucosyl and glucoronyl transferases	transferase/ transferase, transferring glycosyl groups | chr2:15981700-15982917 REVERSE
BnaC01g39240D	-4.54503	26.2	misc.UDP glucosyl and glucoronyl transferases	alpha 1,4-glycosyltransferase family protein / glycosyltransferase sugar-binding DXD motif-containing protein | chr3:2753307-2754621 FORWARD
BnaC02g06070D	-2.32636	26.2	misc.UDP glucosyl and glucoronyl transferases	Symbols: GAUT14 | GAUT14 (Galacturonosyltransferase 14); polygalacturonate 4-alpha-galacturonosyltransferase/ transferase, transferring glycosyl groups / transferase, transferring hexosyl groups | chr5:5021010-5024742 REVERSE
BnaC03g31850D	-1.97538	26.2	misc.UDP glucosyl and glucoronyl transferases	transferase, transferring glycosyl groups | chr4:507717-512782 REVERSE
BnaC03g42350D	-2.56993	26.2	misc.UDP glucosyl and glucoronyl transferases	UDP-glucoronosyl/UDP-glucosyl transferase family protein | chr3:7667027-7668724 FORWARD
BnaC03g42360D	-2.59652	26.2	misc.UDP glucosyl and glucoronyl transferases	UDP-glucoronosyl/UDP-glucosyl transferase family protein | chr3:7667027-7668724 FORWARD
BnaC03g61090D	-1.51152	26.2	misc.UDP glucosyl and glucoronyl transferases	exostosin family protein | chr4:17867438-17869302 FORWARD
BnaC03g72160D	-1.77646	26.2	misc.UDP glucosyl and glucoronyl transferases	Symbols: GAUT7, LGT7 | GAUT7 (GALACTURONOSYLTRANSFERASE 7); polygalacturonate 4-alpha-galacturonosyltransferase/ transferase, transferring glycosyl groups | chr2:16161808-16165775 REVERSE
BnaC03g76900D	-1.54268	26.2	misc.UDP glucosyl and glucoronyl transferases	glycosyl transferase-related | chr4:10786948-10791433 REVERSE
BnaC04g05850D	-1.06564	26.2	misc.UDP glucosyl and glucoronyl transferases	glycosyl transferase family 2 protein | chr2:16521744-16524687 REVERSE
BnaC04g06670D	-1.25239	26.2	misc.UDP glucosyl and glucoronyl transferases	Symbols: GAUT7, LGT7 | GAUT7 (GALACTURONOSYLTRANSFERASE 7); polygalacturonate 4-alpha-galacturonosyltransferase/ transferase, transferring glycosyl groups | chr2:16161808-16165775 REVERSE
BnaC04g08270D	-2.07254	26.2	misc.UDP glucosyl and glucoronyl transferases	UDP-glucoronosyl/UDP-glucosyl transferase family protein | chr2:15529006-15530749 FORWARD
BnaC04g30900D	-2.16254	26.2	misc.UDP glucosyl and glucoronyl transferases	ALG6, ALG8 glycosyltransferase family protein | chr5:15398284-15401026 REVERSE
BnaC04g31930D	-1.8237	26.2	misc.UDP glucosyl and glucoronyl transferases	glycosyltransferase family 14 protein / core-2/I-branching enzyme family protein | chr5:16004281-16006740 FORWARD
BnaC04g41310D	-1.6495	26.2	misc.UDP glucosyl and glucoronyl transferases	Symbols: GAUT5, LGT5 | LGT5 (LOS GLYCOSYLTRANSFERASE 5); polygalacturonate 4-alpha-galacturonosyltransferase/ transferase, transferring glycosyl groups | chr2:13020397-13024208 REVERSE
BnaC04g42530D	-2.70468	26.2	misc.UDP glucosyl and glucoronyl transferases	UDP-glucoronosyl/UDP-glucosyl transferase family protein | chr2:13518211-13520364 FORWARD
BnaC04g45840D	-2.03859	26.2	misc.UDP glucosyl and glucoronyl transferases	Symbols: GAUT7, LGT7 | GAUT7 (GALACTURONOSYLTRANSFERASE 7); polygalacturonate 4-alpha-galacturonosyltransferase/ transferase, transferring glycosyl groups | chr2:16161808-16165775 REVERSE
BnaC05g15290D	-1.69597	26.2	misc.UDP glucosyl and glucoronyl transferases	glycosyl transferase family 1 protein | chr1:6814793-6816876 FORWARD
BnaC05g16670D	-1.11107	26.2	misc.UDP glucosyl and glucoronyl transferases	exostosin family protein | chr1:7518946-7521504 REVERSE
BnaC05g37410D	-2.20732	26.2	misc.UDP glucosyl and glucoronyl transferases	glycosyl transferase family 1 protein | chr3:5393513-5396759 REVERSE
BnaC06g04480D	-1.31079	26.2	misc.UDP glucosyl and glucoronyl transferases	UDP-glucoronosyl/UDP-glucosyl transferase family protein | chr1:18987809-18989110 FORWARD
BnaC06g09690D	-3.20335	26.2	misc.UDP glucosyl and glucoronyl transferases	glycosyl transferase family 1 protein | chr1:19527842-19531287 FORWARD
BnaC06g12760D	-1.31451	26.2	misc.UDP glucosyl and glucoronyl transferases	glycosyltransferase family 14 protein / core-2/I-branching enzyme family protein | chr5:16004281-16006740 FORWARD
BnaC06g15670D	-2.73929	26.2	misc.UDP glucosyl and glucoronyl transferases	UDP-glucoronosyl/UDP-glucosyl transferase family protein | chr3:20671115-20673372 FORWARD
BnaC06g22840D	-1.82153	26.2	misc.UDP glucosyl and glucoronyl transferases	exostosin family protein | chr1:28059188-28061119 FORWARD
BnaC06g32220D	-2.09067	26.2	misc.UDP glucosyl and glucoronyl transferases	glycosyltransferase family 14 protein / core-2/I-branching enzyme family protein | chr1:26807188-26809504 REVERSE
BnaC06g39220D	-1.78147	26.2	misc.UDP glucosyl and glucoronyl transferases	glycosyl transferase family 1 protein | chr1:29625659-29627989 REVERSE
BnaC07g11500D	-1.42478	26.2	misc.UDP glucosyl and glucoronyl transferases	Symbols: GUT2, IRX10, ATGUT1 | GUT2; catalytic/ glucuronoxylan glucuronosyltransferase | chr1:9529141-9531375 REVERSE
BnaC07g16120D	-3.34702	26.2	misc.UDP glucosyl and glucoronyl transferases	glycosyl transferase family 43 protein | chr5:26822478-26824328 FORWARD
BnaC07g50050D	-3.80613	26.2	misc.UDP glucosyl and glucoronyl transferases	glucosyltransferase-related | chr4:8716601-8717796 REVERSE
BnaC08g07020D	-1.56028	26.2	misc.UDP glucosyl and glucoronyl transferases	exostosin family protein | chr1:12492411-12494544 REVERSE
BnaC08g19800D	-1.62959	26.2	misc.UDP glucosyl and glucoronyl transferases	exostosin family protein | chr1:7518946-7521504 REVERSE
BnaC08g20240D	-3.54553	26.2	misc.UDP glucosyl and glucoronyl transferases	galactosyltransferase family protein | chr1:9421177-9424069 FORWARD
BnaC08g24240D	-1.03259	26.2	misc.UDP glucosyl and glucoronyl transferases	Symbols: UGT73D1 | UGT73D1 (UDP-glucosyl transferase 73D1); UDP-glycosyltransferase/ transferase, transferring hexosyl groups | chr3:19697736-19699259 REVERSE
BnaC08g26630D	-1.94312	26.2	misc.UDP glucosyl and glucoronyl transferases	UDP-glucoronosyl/UDP-glucosyl transferase family protein | chr3:20671115-20673372 FORWARD
BnaC08g28640D	-2.56202	26.2	misc.UDP glucosyl and glucoronyl transferases	exostosin family protein | chr3:21339302-21343796 REVERSE
BnaC08g34730D	-1.54954	26.2	misc.UDP glucosyl and glucoronyl transferases	galactosyl transferase GMA12/MNN10 family protein | chr2:9744225-9746292 REVERSE
BnaC09g10660D	-2.81558	26.2	misc.UDP glucosyl and glucoronyl transferases	Symbols: GAUT15 | GAUT15 (Galacturonosyltransferase 15); polygalacturonate 4-alpha-galacturonosyltransferase/ transferase, transferring glycosyl groups / transferase, transferring hexosyl groups | chr3:21742071-21746324 REVERSE
BnaC09g49560D	-1.51579	26.2	misc.UDP glucosyl and glucoronyl transferases	UDP-glucoronosyl/UDP-glucosyl transferase family protein | chr5:1772543-1774113 FORWARD
BnaC09g54350D	-2.19476	26.2	misc.UDP glucosyl and glucoronyl transferases	glycosyltransferase family protein 2 | chr5:24402129-24404948 REVERSE
BnaCnng07110D	-3.34104	26.2	misc.UDP glucosyl and glucoronyl transferases	Symbols: UGT71B1 | UGT71B1 (UDP-GLUCOSYL TRANSFERASE 71B1); UDP-glycosyltransferase/ quercetin 3-O-glucosyltransferase/ transferase, transferring glycosyl groups | chr3:7664345-7666195 FORWARD
BnaCnng24210D	-3.25993	26.2	misc.UDP glucosyl and glucoronyl transferases	alpha 1,4-glycosyltransferase family protein / glycosyltransferase sugar-binding DXD motif-containing protein | chr3:2753307-2754621 FORWARD
BnaCnng25370D	-4.04712	26.2	misc.UDP glucosyl and glucoronyl transferases	exostosin family protein | chr5:14618107-14620282 FORWARD
BnaCnng34200D	-1.9111	26.2	misc.UDP glucosyl and glucoronyl transferases	Symbols: GAUT3 | GAUT3 (Galacturonosyltransferase 3); polygalacturonate 4-alpha-galacturonosyltransferase/ transferase, transferring glycosyl groups | chr4:17938372-17941558 FORWARD
BnaCnng37570D	-3.50222	26.2	misc.UDP glucosyl and glucoronyl transferases	Symbols: UGT76E11 | UGT76E11 (UDP-GLUCOSYL TRANSFERASE 76E11); UDP-glycosyltransferase/ quercetin 3-O-glucosyltransferase/ quercetin 7-O-glucosyltransferase/ transferase, transferring glycosyl groups | chr3:17192589-17194397 REVERSE
BnaCnng43180D	-1.22321	26.2	misc.UDP glucosyl and glucoronyl transferases	glycosyltransferase family 14 protein / core-2/I-branching enzyme family protein | chr1:877862-880158 REVERSE
BnaCnng45020D	-2.02417	26.2	misc.UDP glucosyl and glucoronyl transferases	Symbols: GATL6, LGT10 | GATL6; polygalacturonate 4-alpha-galacturonosyltransferase/ transferase, transferring glycosyl groups / transferase, transferring hexosyl groups | chr4:944367-947085 REVERSE
BnaC04g08280D	1.13221	26.2	misc.UDP glucosyl and glucoronyl transferases	UDP-glucoronosyl/UDP-glucosyl transferase family protein | chr2:15529006-15530749 FORWARD
BnaC03g42410D	1.25974	26.2	misc.UDP glucosyl and glucoronyl transferases	UDP-glucoronosyl/UDP-glucosyl transferase family protein | chr3:7676927-7678414 REVERSE
BnaA08g11390D	1.24436	26.2	misc.UDP glucosyl and glucoronyl transferases	Symbols: UGT73B3 | UGT73B3 (UDP-glucosyl transferase 73B3); UDP-glycosyltransferase/ abscisic acid glucosyltransferase/ quercetin 3-O-glucosyltransferase/ transferase, transferring hexosyl groups | chr4:16343057-16344818 REVERSE
BnaC01g31890D	3.98492	26.2	misc.UDP glucosyl and glucoronyl transferases	Symbols: UGT84A2 | UGT84A2; UDP-glycosyltransferase/ sinapate 1-glucosyltransferase | chr3:7595806-7597577 FORWARD
BnaC03g06960D	1.34165	26.2	misc.UDP glucosyl and glucoronyl transferases	Symbols: GAUT14 | GAUT14 (Galacturonosyltransferase 14); polygalacturonate 4-alpha-galacturonosyltransferase/ transferase, transferring glycosyl groups / transferase, transferring hexosyl groups | chr5:5021010-5024742 REVERSE
BnaC05g30670D	2.18536	26.2	misc.UDP glucosyl and glucoronyl transferases	Symbols: UGT84A2 | UGT84A2; UDP-glycosyltransferase/ sinapate 1-glucosyltransferase | chr3:7595806-7597577 FORWARD
BnaA08g14250D	1.13135	26.2	misc.UDP glucosyl and glucoronyl transferases	galactosyltransferase family protein | chr4:13529425-13532699 REVERSE
BnaA03g13740D	1.39288	26.2	misc.UDP glucosyl and glucoronyl transferases	UDP-glucoronosyl/UDP-glucosyl transferase family protein | chr2:12872134-12873820 FORWARD
BnaC04g10300D	1.10054	26.2	misc.UDP glucosyl and glucoronyl transferases	UTP--glucose-1-phosphate uridylyltransferase family protein | chr2:14756711-14760706 FORWARD
BnaC08g45200D	1.36819	26.2	misc.UDP glucosyl and glucoronyl transferases	Symbols: UGT71C4 | UGT71C4 (UDP-GLUCOSYL TRANSFERASE 71C4); quercetin 3-O-glucosyltransferase/ quercetin 7-O-glucosyltransferase/ transferase, transferring glycosyl groups | chr1:2225900-2227566 FORWARD
BnaA03g05430D	1.34773	26.2	misc.UDP glucosyl and glucoronyl transferases	Symbols: GAUT14 | GAUT14 (Galacturonosyltransferase 14); polygalacturonate 4-alpha-galacturonosyltransferase/ transferase, transferring glycosyl groups / transferase, transferring hexosyl groups | chr5:5021010-5024742 REVERSE
BnaA05g19630D	3.03387	26.2	misc.UDP glucosyl and glucoronyl transferases	Symbols: UGT84A2 | UGT84A2; UDP-glycosyltransferase/ sinapate 1-glucosyltransferase | chr3:7595806-7597577 FORWARD
BnaC07g12870D	1.98774	26.2	misc.UDP glucosyl and glucoronyl transferases	Symbols: GATL8, LGT9 | LGT9; polygalacturonate 4-alpha-galacturonosyltransferase/ transferase, transferring glycosyl groups / transferase, transferring hexosyl groups | chr1:8557216-8558832 REVERSE
BnaCnng43810D	3.51326	26.2	misc.UDP glucosyl and glucoronyl transferases	Symbols: UGT74D1 | UGT74D1 (UDP-glucosyl transferase 74D1); UDP-glycosyltransferase/ abscisic acid glucosyltransferase/ transferase, transferring glycosyl groups / transferase, transferring hexosyl groups | chr2:13497233-13500023 FORWARD
BnaA07g22470D	2.95842	26.2	misc.UDP glucosyl and glucoronyl transferases	Symbols: UGT89B1 | UGT89B1 (UDP-GLUCOSYL TRANSFERASE 89B1); UDP-glycosyltransferase/ quercetin 3-O-glucosyltransferase/ quercetin 4'-O-glucosyltransferase/ quercetin 7-O-glucosyltransferase/ transferase, transferring glycosyl groups / transferase, transferring hexosyl group | chr1:27784981-27786804 FORWARD
BnaC03g16650D	2.48094	26.2	misc.UDP glucosyl and glucoronyl transferases	UDP-glucoronosyl/UDP-glucosyl transferase family protein | chr2:12872134-12873820 FORWARD
BnaA10g18710D	2.52734	26.2	misc.UDP glucosyl and glucoronyl transferases	Symbols: GAUT14 | GAUT14 (Galacturonosyltransferase 14); polygalacturonate 4-alpha-galacturonosyltransferase/ transferase, transferring glycosyl groups / transferase, transferring hexosyl groups | chr5:5021010-5024742 REVERSE
BnaA08g07500D	1.58871	26.2	misc.UDP glucosyl and glucoronyl transferases	exostosin family protein | chr4:8084395-8086095 FORWARD
BnaC03g46720D	2.84804	26.2	misc.UDP glucosyl and glucoronyl transferases	UDP-glucoronosyl/UDP-glucosyl transferase family protein | chr2:7316889-7319181 FORWARD
BnaA06g20500D	4.23058	26.2	misc.UDP glucosyl and glucoronyl transferases	Symbols: UGT76E11 | UGT76E11 (UDP-GLUCOSYL TRANSFERASE 76E11); UDP-glycosyltransferase/ quercetin 3-O-glucosyltransferase/ quercetin 7-O-glucosyltransferase/ transferase, transferring glycosyl groups | chr3:17192589-17194397 REVERSE
BnaA07g09060D	3.09691	26.2	misc.UDP glucosyl and glucoronyl transferases	Symbols: GATL8, LGT9 | LGT9; polygalacturonate 4-alpha-galacturonosyltransferase/ transferase, transferring glycosyl groups / transferase, transferring hexosyl groups | chr1:8557216-8558832 REVERSE
BnaC08g12360D	2.38022	26.2	misc.UDP glucosyl and glucoronyl transferases	galactosyltransferase family protein | chr4:13529425-13532699 REVERSE
BnaCnng47000D	1.06901	26.2	misc.UDP glucosyl and glucoronyl transferases	exostosin family protein | chr4:8084395-8086095 FORWARD
BnaC05g19620D	1.30999	26.2	misc.UDP glucosyl and glucoronyl transferases	galactosyltransferase family protein | chr1:9421177-9424069 FORWARD
BnaC06g16920D	2.31569	26.2	misc.UDP glucosyl and glucoronyl transferases	Symbols: GAUT15 | GAUT15 (Galacturonosyltransferase 15); polygalacturonate 4-alpha-galacturonosyltransferase/ transferase, transferring glycosyl groups / transferase, transferring hexosyl groups | chr3:21742071-21746324 REVERSE
BnaAnng15830D	2.04934	26.2	misc.UDP glucosyl and glucoronyl transferases	Symbols: UGT71C4 | UGT71C4 (UDP-GLUCOSYL TRANSFERASE 71C4); quercetin 3-O-glucosyltransferase/ quercetin 7-O-glucosyltransferase/ transferase, transferring glycosyl groups | chr1:2225900-2227566 FORWARD
BnaC05g19300D	1.56577	26.2	misc.UDP glucosyl and glucoronyl transferases	Symbols: GATL8, LGT9 | LGT9; polygalacturonate 4-alpha-galacturonosyltransferase/ transferase, transferring glycosyl groups / transferase, transferring hexosyl groups | chr1:8557216-8558832 REVERSE
BnaA01g24990D	4.30984	26.2	misc.UDP glucosyl and glucoronyl transferases	Symbols: UGT84A2 | UGT84A2; UDP-glycosyltransferase/ sinapate 1-glucosyltransferase | chr3:7595806-7597577 FORWARD
BnaA09g29710D	1.44474	26.2	misc.UDP glucosyl and glucoronyl transferases	Symbols: GATL8, LGT9 | LGT9; polygalacturonate 4-alpha-galacturonosyltransferase/ transferase, transferring glycosyl groups / transferase, transferring hexosyl groups | chr1:8557216-8558832 REVERSE
BnaC03g51850D	2.60858	26.2	misc.UDP glucosyl and glucoronyl transferases	exostosin family protein | chr5:24988456-24990009 REVERSE
BnaC05g14260D	1.97493	26.2	misc.UDP glucosyl and glucoronyl transferases	Symbols: GAUT11 | GAUT11 (Galacturonosyltransferase 11); polygalacturonate 4-alpha-galacturonosyltransferase | chr1:6395864-6398239 FORWARD
BnaA06g21680D	3.13896	26.2	misc.UDP glucosyl and glucoronyl transferases	exostosin family protein | chr5:24988456-24990009 REVERSE
BnaA07g28600D	1.92597	26.2	misc.UDP glucosyl and glucoronyl transferases	Symbols: GATL9, LGT8 | LGT8 (GLUCOSYL TRANSFERASE FAMILY 8); polygalacturonate 4-alpha-galacturonosyltransferase/ transferase, transferring glycosyl groups / transferase, transferring hexosyl groups | chr1:26400790-26402397 FORWARD
BnaA07g18060D	4.1415	26.2	misc.UDP glucosyl and glucoronyl transferases	Symbols: GAUT15 | GAUT15 (Galacturonosyltransferase 15); polygalacturonate 4-alpha-galacturonosyltransferase/ transferase, transferring glycosyl groups / transferase, transferring hexosyl groups | chr3:21742071-21746324 REVERSE
BnaA01g23020D	7.56986	26.2	misc.UDP glucosyl and glucoronyl transferases	Symbols: UGT75B2, UGT2 | UGT75B2 (UDP-GLUCOSYL TRANSFERASE 75B2); UDP-glucosyltransferase/ UDP-glycosyltransferase/ abscisic acid glucosyltransferase/ transferase, transferring glycosyl groups | chr1:1636496-1637863 REVERSE
BnaC09g42440D	1.92481	26.2	misc.UDP glucosyl and glucoronyl transferases	Symbols: GAUT14 | GAUT14 (Galacturonosyltransferase 14); polygalacturonate 4-alpha-galacturonosyltransferase/ transferase, transferring glycosyl groups / transferase, transferring hexosyl groups | chr5:5021010-5024742 REVERSE
BnaA03g40930D	1.88088	26.2	misc.UDP glucosyl and glucoronyl transferases	Symbols: GATL2 | GATL2 (Galacturonosyltransferase-like 2); polygalacturonate 4-alpha-galacturonosyltransferase/ transferase, transferring glycosyl groups / transferase, transferring hexosyl groups | chr3:18868065-18869384 FORWARD
BnaA05g32810D	4.01045	26.2	misc.UDP glucosyl and glucoronyl transferases	Symbols: EDA5 | EDA5 (embryo sac development arrest 5); catalytic | chr3:884133-886410 REVERSE
BnaC07g49990D	2.22805	26.2	misc.UDP glucosyl and glucoronyl transferases	Symbols: GATL2 | GATL2 (Galacturonosyltransferase-like 2); polygalacturonate 4-alpha-galacturonosyltransferase/ transferase, transferring glycosyl groups / transferase, transferring hexosyl groups | chr3:18868065-18869384 FORWARD
BnaCnng62810D	6.62611	26.2	misc.UDP glucosyl and glucoronyl transferases	Symbols: UGT74D1 | UGT74D1 (UDP-glucosyl transferase 74D1); UDP-glycosyltransferase/ abscisic acid glucosyltransferase/ transferase, transferring glycosyl groups / transferase, transferring hexosyl groups | chr2:13497233-13500023 FORWARD
BnaCnng03910D	2.12324	26.2	misc.UDP glucosyl and glucoronyl transferases	alpha 1,4-glycosyltransferase family protein / glycosyltransferase sugar-binding DXD motif-containing protein | chr5:102293-103770 REVERSE
BnaC06g31180D	2.92234	26.2	misc.UDP glucosyl and glucoronyl transferases	Symbols: GATL9, LGT8 | LGT8 (GLUCOSYL TRANSFERASE FAMILY 8); polygalacturonate 4-alpha-galacturonosyltransferase/ transferase, transferring glycosyl groups / transferase, transferring hexosyl groups | chr1:26400790-26402397 FORWARD
BnaA09g29530D	1.70092	26.2	misc.UDP glucosyl and glucoronyl transferases	galactosyltransferase family protein | chr1:9421177-9424069 FORWARD
BnaC04g08460D	4.15798	26.2	misc.UDP glucosyl and glucoronyl transferases	UDP-glucoronosyl/UDP-glucosyl transferase family protein | chr2:15415139-15416766 REVERSE
BnaA01g03020D	9.42066	26.2	misc.UDP glucosyl and glucoronyl transferases	Symbols: UGT73B3 | UGT73B3 (UDP-glucosyl transferase 73B3); UDP-glycosyltransferase/ abscisic acid glucosyltransferase/ quercetin 3-O-glucosyltransferase/ transferase, transferring hexosyl groups | chr4:16343057-16344818 REVERSE
BnaA05g07600D	5.97543	26.2	misc.UDP glucosyl and glucoronyl transferases	UDP-glucoronosyl/UDP-glucosyl transferase family protein | chr2:15415139-15416766 REVERSE
BnaC01g04250D	6.21055	26.2	misc.UDP glucosyl and glucoronyl transferases	Symbols: UGT73B3 | UGT73B3 (UDP-glucosyl transferase 73B3); UDP-glycosyltransferase/ abscisic acid glucosyltransferase/ quercetin 3-O-glucosyltransferase/ transferase, transferring hexosyl groups | chr4:16343057-16344818 REVERSE
BnaA03g41940D	4.89902	26.2	misc.UDP glucosyl and glucoronyl transferases	Symbols: UGT84A1 | UGT84A1; UDP-glycosyltransferase/ sinapate 1-glucosyltransferase/ transferase, transferring glycosyl groups | chr4:8848801-8850516 REVERSE
BnaC03g17740D	4.87036	26.2	misc.UDP glucosyl and glucoronyl transferases	Symbols: UGT74D1 | UGT74D1 (UDP-glucosyl transferase 74D1); UDP-glycosyltransferase/ abscisic acid glucosyltransferase/ transferase, transferring glycosyl groups / transferase, transferring hexosyl groups | chr2:13497233-13500023 FORWARD
BnaA01g00100D	-1.85578	26.2	misc.UDP glucosyl and glucoronyl transferases	exostosin family protein | chr4:17867438-17869302 FORWARD
BnaA01g04800D	-1.07847	26.2	misc.UDP glucosyl and glucoronyl transferases	galactosyltransferase family protein | chr4:15516784-15519855 REVERSE
BnaA01g18400D	2.27115	26.2	misc.UDP glucosyl and glucoronyl transferases	Symbols: IAGLU | IAGLU (INDOLE-3-ACETATE BETA-D-GLUCOSYLTRANSFERASE); UDP-glycosyltransferase/ transferase, transferring glycosyl groups | chr4:8877590-8879327 REVERSE
BnaA01g18530D	2.78189	26.2	misc.UDP glucosyl and glucoronyl transferases	Symbols: UGT84A3 | UGT84A3; UDP-glycosyltransferase/ sinapate 1-glucosyltransferase/ transferase, transferring glycosyl groups | chr4:8852698-8854545 REVERSE
BnaA01g18670D	-1.56906	26.2	misc.UDP glucosyl and glucoronyl transferases	glucosyltransferase-related | chr4:8716601-8717796 REVERSE
BnaA03g14700D	2.93041	26.2	misc.UDP glucosyl and glucoronyl transferases	Symbols: UGT74D1 | UGT74D1 (UDP-glucosyl transferase 74D1); UDP-glycosyltransferase/ abscisic acid glucosyltransferase/ transferase, transferring glycosyl groups / transferase, transferring hexosyl groups | chr2:13497233-13500023 FORWARD
BnaA03g14810D	-1.485	26.2	misc.UDP glucosyl and glucoronyl transferases	exostosin family protein | chr2:13611351-13613573 REVERSE
BnaA03g17980D	-1.80735	26.2	misc.UDP glucosyl and glucoronyl transferases	Symbols: GAUT7, LGT7 | GAUT7 (GALACTURONOSYLTRANSFERASE 7); polygalacturonate 4-alpha-galacturonosyltransferase/ transferase, transferring glycosyl groups | chr2:16161808-16165775 REVERSE
BnaA03g36460D	-2.29373	26.2	misc.UDP glucosyl and glucoronyl transferases	UDP-glucoronosyl/UDP-glucosyl transferase family protein | chr3:7676927-7678414 REVERSE
BnaA03g41970D	3.48975	26.2	misc.UDP glucosyl and glucoronyl transferases	Symbols: IAGLU | IAGLU (INDOLE-3-ACETATE BETA-D-GLUCOSYLTRANSFERASE); UDP-glycosyltransferase/ transferase, transferring glycosyl groups | chr4:8877590-8879327 REVERSE
BnaA03g58000D	-8.73697	26.2	misc.UDP glucosyl and glucoronyl transferases	glucosyltransferase-related | chr4:8716601-8717796 REVERSE
BnaA04g16230D	-1.5052	26.2	misc.UDP glucosyl and glucoronyl transferases	glycosyltransferase family protein | chr2:11960571-11963293 REVERSE
BnaA04g19910D	1.32745	26.2	misc.UDP glucosyl and glucoronyl transferases	UDP-glucoronosyl/UDP-glucosyl transferase family protein | chr5:871460-873057 FORWARD
BnaA04g21090D	8.78136	26.2	misc.UDP glucosyl and glucoronyl transferases	Symbols: UGT73C2 | UGT73C2 (UDP-glucosyl transferase 73C2); UDP-glycosyltransferase/ transferase, transferring glycosyl groups / transferase, transferring hexosyl groups | chr2:15413042-15414594 REVERSE
BnaA04g27220D	-1.34134	26.2	misc.UDP glucosyl and glucoronyl transferases	Symbols: ATXT1, XT1, XXT1 | XT1 (XYLOSYLTRANSFERASE 1); UDP-xylosyltransferase/ transferase/ transferase, transferring glycosyl groups / xyloglucan 6-xylosyltransferase | chr3:23201117-23202907 FORWARD
BnaA05g06410D	-1.07861	26.2	misc.UDP glucosyl and glucoronyl transferases	Symbols: GAUT7, LGT7 | GAUT7 (GALACTURONOSYLTRANSFERASE 7); polygalacturonate 4-alpha-galacturonosyltransferase/ transferase, transferring glycosyl groups | chr2:16161808-16165775 REVERSE
BnaA05g07610D	10.427	26.2	misc.UDP glucosyl and glucoronyl transferases	UDP-glucoronosyl/UDP-glucosyl transferase family protein | chr2:15417490-15419154 REVERSE
BnaA05g08890D	-2.0698	26.2	misc.UDP glucosyl and glucoronyl transferases	UTP--glucose-1-phosphate uridylyltransferase family protein | chr2:14756711-14760706 FORWARD
BnaA05g19470D	1.5478	26.2	misc.UDP glucosyl and glucoronyl transferases	UDP-glucoronosyl/UDP-glucosyl transferase family protein | chr3:7667027-7668724 FORWARD
BnaA05g24260D	1.41696	26.2	misc.UDP glucosyl and glucoronyl transferases	glycosyltransferase family 14 protein / core-2/I-branching enzyme family protein | chr3:5166206-5169151 FORWARD
BnaA05g27700D	2.33348	26.2	misc.UDP glucosyl and glucoronyl transferases	UDP-glucoronosyl/UDP-glucosyl transferase family protein | chr3:3556705-3558269 FORWARD
BnaA07g03360D	2.34144	26.2	misc.UDP glucosyl and glucoronyl transferases	UDP-glucoronosyl/UDP-glucosyl transferase family protein | chr2:7316889-7319181 FORWARD
BnaA07g09130D	-1.55973	26.2	misc.UDP glucosyl and glucoronyl transferases	galactosyltransferase family protein | chr1:9421177-9424069 FORWARD
BnaA07g09590D	-1.58496	26.2	misc.UDP glucosyl and glucoronyl transferases	galactosyltransferase family protein | chr1:9421177-9424069 FORWARD
BnaA08g20120D	-3.83735	26.2	misc.UDP glucosyl and glucoronyl transferases	galactosyltransferase family protein | chr1:9421177-9424069 FORWARD
BnaA08g20880D	1.22947	26.2	misc.UDP glucosyl and glucoronyl transferases	Symbols: AtUGT85A2 | AtUGT85A2 (UDP-glucosyl transferase 85A2); UDP-glycosyltransferase/ glucuronosyltransferase/ transferase, transferring glycosyl groups | chr1:7894858-7897591 REVERSE
BnaA08g21370D	-2.90999	26.2	misc.UDP glucosyl and glucoronyl transferases	Symbols: UGT73B5 | UGT73B5 (UDP-glucosyl transferase 73B5); UDP-glucosyltransferase/ UDP-glycosyltransferase/ quercetin 3-O-glucosyltransferase/ transferase, transferring glycosyl groups | chr2:6758681-6760633 FORWARD
BnaA09g16740D	-3.21115	26.2	misc.UDP glucosyl and glucoronyl transferases	Symbols: UGT73B5 | UGT73B5 (UDP-glucosyl transferase 73B5); UDP-glucosyltransferase/ UDP-glycosyltransferase/ quercetin 3-O-glucosyltransferase/ transferase, transferring glycosyl groups | chr2:6758681-6760633 FORWARD
BnaA09g30680D	-2.13979	26.2	misc.UDP glucosyl and glucoronyl transferases	Symbols: AtUGT85A2 | AtUGT85A2 (UDP-glucosyl transferase 85A2); UDP-glycosyltransferase/ glucuronosyltransferase/ transferase, transferring glycosyl groups | chr1:7894858-7897591 REVERSE
BnaA09g40070D	-1.38421	26.2	misc.UDP glucosyl and glucoronyl transferases	Symbols: ATXT1, XT1, XXT1 | XT1 (XYLOSYLTRANSFERASE 1); UDP-xylosyltransferase/ transferase/ transferase, transferring glycosyl groups / xyloglucan 6-xylosyltransferase | chr3:23201117-23202907 FORWARD
BnaA10g12540D	-4.41636	26.2	misc.UDP glucosyl and glucoronyl transferases	Symbols: UGT76E2 | UGT76E2 (UDP-GLUCOSYL TRANSFERASE 76E2); UDP-glycosyltransferase/ quercetin 3-O-glucosyltransferase/ quercetin 7-O-glucosyltransferase | chr5:24008983-24010649 REVERSE
BnaA10g21310D	-3.53605	26.2	misc.UDP glucosyl and glucoronyl transferases	exostosin family protein | chr5:3543622-3544724 FORWARD
BnaA10g23440D	-6.82443	26.2	misc.UDP glucosyl and glucoronyl transferases	galactosyl transferase GMA12/MNN10 family protein | chr5:2455634-2457316 FORWARD
BnaAnng27210D	-1.0923	26.2	misc.UDP glucosyl and glucoronyl transferases	glycosyl transferase-related | chr4:10786948-10791433 REVERSE
BnaC01g22410D	4.02067	26.2	misc.UDP glucosyl and glucoronyl transferases	Symbols: UGT84A3 | UGT84A3; UDP-glycosyltransferase/ sinapate 1-glucosyltransferase/ transferase, transferring glycosyl groups | chr4:8852698-8854545 REVERSE
BnaC01g36150D	2.38793	26.2	misc.UDP glucosyl and glucoronyl transferases	glycosyltransferase family 14 protein / core-2/I-branching enzyme family protein | chr3:5166206-5169151 FORWARD
BnaC01g38090D	-3.79701	26.2	misc.UDP glucosyl and glucoronyl transferases	transferase/ transferase, transferring glycosyl groups | chr2:15981700-15982917 REVERSE
BnaC02g35080D	9.01309	26.2	misc.UDP glucosyl and glucoronyl transferases	Symbols: UGT73B3 | UGT73B3 (UDP-glucosyl transferase 73B3); UDP-glycosyltransferase/ abscisic acid glucosyltransferase/ quercetin 3-O-glucosyltransferase/ transferase, transferring hexosyl groups | chr4:16343057-16344818 REVERSE
BnaC03g17730D	2.70196	26.2	misc.UDP glucosyl and glucoronyl transferases	Symbols: UGT74D1 | UGT74D1 (UDP-glucosyl transferase 74D1); UDP-glycosyltransferase/ abscisic acid glucosyltransferase/ transferase, transferring glycosyl groups / transferase, transferring hexosyl groups | chr2:13497233-13500023 FORWARD
BnaC03g17860D	-2.48628	26.2	misc.UDP glucosyl and glucoronyl transferases	exostosin family protein | chr2:13611351-13613573 REVERSE
BnaC03g26760D	-2.23173	26.2	misc.UDP glucosyl and glucoronyl transferases	Symbols: UGT76D1 | UGT76D1 (UDP-GLUCOSYL TRANSFERASE 76D1); UDP-glycosyltransferase/ quercetin 7-O-glucosyltransferase/ transferase, transferring glycosyl groups | chr2:11263963-11265684 FORWARD
BnaC04g08480D	10.1378	26.2	misc.UDP glucosyl and glucoronyl transferases	UDP-glucoronosyl/UDP-glucosyl transferase family protein | chr2:15417490-15419154 REVERSE
BnaC04g39460D	-1.50664	26.2	misc.UDP glucosyl and glucoronyl transferases	glycosyltransferase family protein | chr2:11960571-11963293 REVERSE
BnaC05g17420D	-1.33128	26.2	misc.UDP glucosyl and glucoronyl transferases	Symbols: AtUGT85A2 | AtUGT85A2 (UDP-glucosyl transferase 85A2); UDP-glycosyltransferase/ glucuronosyltransferase/ transferase, transferring glycosyl groups | chr1:7894858-7897591 REVERSE
BnaC05g37400D	-4.11746	26.2	misc.UDP glucosyl and glucoronyl transferases	glycosyl transferase family 1 protein | chr3:5393513-5396759 REVERSE
BnaC07g12790D	-1.17688	26.2	misc.UDP glucosyl and glucoronyl transferases	galactosyltransferase family protein | chr1:9421177-9424069 FORWARD
BnaC07g29030D	-1.01408	26.2	misc.UDP glucosyl and glucoronyl transferases	exostosin family protein | chr5:8997183-9000329 REVERSE
BnaC07g33070D	2.23704	26.2	misc.UDP glucosyl and glucoronyl transferases	Symbols: IAGLU | IAGLU (INDOLE-3-ACETATE BETA-D-GLUCOSYLTRANSFERASE); UDP-glycosyltransferase/ transferase, transferring glycosyl groups | chr4:8877590-8879327 REVERSE
BnaC07g50550D	1.37504	26.2	misc.UDP glucosyl and glucoronyl transferases	UDP-glucoronosyl/UDP-glucosyl transferase family protein | chr3:7667027-7668724 FORWARD
BnaC08g10220D	1.58075	26.2	misc.UDP glucosyl and glucoronyl transferases	Symbols: IAGLU | IAGLU (INDOLE-3-ACETATE BETA-D-GLUCOSYLTRANSFERASE); UDP-glycosyltransferase/ transferase, transferring glycosyl groups | chr4:8877590-8879327 REVERSE
BnaC08g12510D	-6.86625	26.2	misc.UDP glucosyl and glucoronyl transferases	glycosyltransferase family 14 protein / core-2/I-branching enzyme family protein | chr4:13736835-13738915 REVERSE
BnaCnng07130D	1.42223	26.2	misc.UDP glucosyl and glucoronyl transferases	UDP-glucoronosyl/UDP-glucosyl transferase family protein | chr3:7667027-7668724 FORWARD
BnaCnng17130D	1.14881	26.2	misc.UDP glucosyl and glucoronyl transferases	glycosyltransferase family 14 protein / core-2/I-branching enzyme family protein | chr1:26807188-26809504 REVERSE
BnaCnng18130D	-1.21589	26.2	misc.UDP glucosyl and glucoronyl transferases	galactosyltransferase family protein | chr1:3957473-3960113 FORWARD
BnaCnng19100D	-1.4593	26.2	misc.UDP glucosyl and glucoronyl transferases	Symbols: ATXT2, XXT2, XT2 | XT2 (UDP-XYLOSYLTRANSFERASE 2); UDP-xylosyltransferase/ transferase/ transferase, transferring glycosyl groups / xyloglucan 6-xylosyltransferase | chr4:1101507-1103610 FORWARD
BnaCnng47330D	1.1554	26.2	misc.UDP glucosyl and glucoronyl transferases	Symbols: UGT73B3 | UGT73B3 (UDP-glucosyl transferase 73B3); UDP-glycosyltransferase/ abscisic acid glucosyltransferase/ quercetin 3-O-glucosyltransferase/ transferase, transferring hexosyl groups | chr4:16343057-16344818 REVERSE
BnaA02g09020D	-3.66255	26.21	misc.protease inhibitor/seed storage/lipid transfer protein (LTP) family protein	protease inhibitor/seed storage/lipid transfer protein (LTP) family protein | chr5:22467430-22468263 FORWARD
BnaA02g20630D	-6.37069	26.21	misc.protease inhibitor/seed storage/lipid transfer protein (LTP) family protein	protease inhibitor/seed storage/lipid transfer protein (LTP) family protein | chr4:69273-69875 REVERSE
BnaA02g30210D	-4.77227	26.21	misc.protease inhibitor/seed storage/lipid transfer protein (LTP) family protein	protease inhibitor/seed storage/lipid transfer protein (LTP) family protein | chr5:19647835-19648281 REVERSE
BnaA03g21100D	-1.64373	26.21	misc.protease inhibitor/seed storage/lipid transfer protein (LTP) family protein	protease inhibitor/seed storage/lipid transfer protein (LTP) family protein | chr2:18626320-18626997 FORWARD
BnaA05g13220D	-5.2854	26.21	misc.protease inhibitor/seed storage/lipid transfer protein (LTP) family protein	protease inhibitor/seed storage/lipid transfer protein (LTP)-related | chr4:8502374-8503199 REVERSE
BnaA05g35420D	-1.7577	26.21	misc.protease inhibitor/seed storage/lipid transfer protein (LTP) family protein	protease inhibitor/seed storage/lipid transfer protein (LTP)-related | chr4:8502374-8503199 REVERSE
BnaA06g38220D	-1.22926	26.21	misc.protease inhibitor/seed storage/lipid transfer protein (LTP) family protein	Symbols: ELP | ELP (EXTENSIN-LIKE PROTEIN); lipid binding | chr1:4089847-4090725 REVERSE
BnaA08g00590D	-2.35216	26.21	misc.protease inhibitor/seed storage/lipid transfer protein (LTP) family protein	lipid binding | chr1:20614633-20616435 FORWARD
BnaC02g13020D	-4.12443	26.21	misc.protease inhibitor/seed storage/lipid transfer protein (LTP) family protein	protease inhibitor/seed storage/lipid transfer protein (LTP) family protein | chr5:22467430-22468263 FORWARD
BnaC02g13050D	-10.8507	26.21	misc.protease inhibitor/seed storage/lipid transfer protein (LTP) family protein	protease inhibitor/seed storage/lipid transfer protein (LTP) family protein | chr5:22467430-22468263 FORWARD
BnaC03g25160D	-2.54745	26.21	misc.protease inhibitor/seed storage/lipid transfer protein (LTP) family protein	protease inhibitor/seed storage/lipid transfer protein (LTP) family protein | chr2:18626320-18626997 FORWARD
BnaC06g41560D	-1.11793	26.21	misc.protease inhibitor/seed storage/lipid transfer protein (LTP) family protein	lipid binding | chr1:20614633-20616435 FORWARD
BnaC09g08390D	-2.62467	26.21	misc.protease inhibitor/seed storage/lipid transfer protein (LTP) family protein	protease inhibitor/seed storage/lipid transfer protein (LTP) family protein | chr2:4310412-4312103 REVERSE
BnaC09g13410D	-2.67807	26.21	misc.protease inhibitor/seed storage/lipid transfer protein (LTP) family protein	protease inhibitor/seed storage/lipid transfer protein (LTP) family protein | chr1:23136369-23137191 REVERSE
BnaCnng37610D	-10.2722	26.21	misc.protease inhibitor/seed storage/lipid transfer protein (LTP) family protein	protease inhibitor/seed storage/lipid transfer protein (LTP) family protein | chr4:7417236-7417803 REVERSE
BnaCnng47750D	-10.3517	26.21	misc.protease inhibitor/seed storage/lipid transfer protein (LTP) family protein	protease inhibitor/seed storage/lipid transfer protein (LTP) family protein | chr4:69273-69875 REVERSE
BnaC02g42910D	1.78202	26.21	misc.protease inhibitor/seed storage/lipid transfer protein (LTP) family protein	protease inhibitor/seed storage/lipid transfer protein (LTP) family protein | chr5:25645263-25646735 REVERSE
BnaA02g34050D	2.02291	26.21	misc.protease inhibitor/seed storage/lipid transfer protein (LTP) family protein	protease inhibitor/seed storage/lipid transfer protein (LTP) family protein | chr5:25645263-25646735 REVERSE
BnaA04g04450D	1.23732	26.21	misc.protease inhibitor/seed storage/lipid transfer protein (LTP) family protein	protease inhibitor/seed storage/lipid transfer protein (LTP) family protein | chr3:19987579-19988269 REVERSE
BnaA03g54590D	3.90122	26.21	misc.protease inhibitor/seed storage/lipid transfer protein (LTP) family protein	protease inhibitor/seed storage/lipid transfer protein (LTP) family protein | chr1:23136369-23137191 REVERSE
BnaAnng11140D	2.02253	26.21	misc.protease inhibitor/seed storage/lipid transfer protein (LTP) family protein	protease inhibitor/seed storage/lipid transfer protein (LTP) family protein | chr3:6267049-6267643 FORWARD
BnaC03g29580D	4.03161	26.21	misc.protease inhibitor/seed storage/lipid transfer protein (LTP) family protein	protease inhibitor/seed storage/lipid transfer protein (LTP) family protein | chr4:7409621-7410406 REVERSE
BnaC03g50130D	2.54719	26.21	misc.protease inhibitor/seed storage/lipid transfer protein (LTP) family protein	protease inhibitor/seed storage/lipid transfer protein (LTP) family protein | chr5:25645263-25646735 REVERSE
BnaA03g25130D	3.56172	26.21	misc.protease inhibitor/seed storage/lipid transfer protein (LTP) family protein	protease inhibitor/seed storage/lipid transfer protein (LTP) family protein | chr4:7409621-7410406 REVERSE
BnaA06g23230D	4.00714	26.21	misc.protease inhibitor/seed storage/lipid transfer protein (LTP) family protein	protease inhibitor/seed storage/lipid transfer protein (LTP) family protein | chr5:25645263-25646735 REVERSE
BnaC02g00930D	2.75992	26.21	misc.protease inhibitor/seed storage/lipid transfer protein (LTP) family protein	protease inhibitor/seed storage/lipid transfer protein (LTP) family protein | chr5:25645263-25646735 REVERSE
BnaAnng05900D	3.73909	26.21	misc.protease inhibitor/seed storage/lipid transfer protein (LTP) family protein	protease inhibitor/seed storage/lipid transfer protein (LTP) family protein | chr5:2909363-2910545 REVERSE
BnaA01g12830D	-9.43045	26.21	misc.protease inhibitor/seed storage/lipid transfer protein (LTP) family protein	lipid binding | chr1:27647756-27648536 REVERSE
BnaA07g13050D	-1.29381	26.21	misc.protease inhibitor/seed storage/lipid transfer protein (LTP) family protein	protease inhibitor/seed storage/lipid transfer protein (LTP) family protein | chr2:11595292-11596542 FORWARD
BnaA07g22630D	-3.36257	26.21	misc.protease inhibitor/seed storage/lipid transfer protein (LTP) family protein	protease inhibitor/seed storage/lipid transfer protein (LTP) family protein | chr1:27649695-27650471 REVERSE
BnaA08g03050D	2.10536	26.21	misc.protease inhibitor/seed storage/lipid transfer protein (LTP) family protein	protease inhibitor/seed storage/lipid transfer protein (LTP) family protein | chr1:18035967-18036510 FORWARD
BnaC02g38640D	-9.78136	26.21	misc.protease inhibitor/seed storage/lipid transfer protein (LTP) family protein	protease inhibitor/seed storage/lipid transfer protein (LTP) family protein | chr5:19647835-19648281 REVERSE
BnaC03g14230D	3.11217	26.21	misc.protease inhibitor/seed storage/lipid transfer protein (LTP) family protein	protease inhibitor/seed storage/lipid transfer protein (LTP) family protein | chr5:22460550-22461250 FORWARD
BnaC04g26730D	1.22431	26.21	misc.protease inhibitor/seed storage/lipid transfer protein (LTP) family protein	protease inhibitor/seed storage/lipid transfer protein (LTP) family protein | chr3:19987579-19988269 REVERSE
BnaC09g31950D	-4.2854	26.21	misc.protease inhibitor/seed storage/lipid transfer protein (LTP) family protein	protease inhibitor/seed storage/lipid transfer protein (LTP) family protein | chr5:22460550-22461250 FORWARD
BnaA03g41450D	-5.61102	26.22	misc.short chain dehydrogenase/reductase (SDR)	short-chain dehydrogenase/reductase (SDR) family protein | chr3:19173622-19174667 REVERSE
BnaA04g03710D	-1.54094	26.22	misc.short chain dehydrogenase/reductase (SDR)	short-chain dehydrogenase/reductase (SDR) family protein | chr3:20502612-20503797 FORWARD
BnaA05g37330D	-5.06369	26.22	misc.short chain dehydrogenase/reductase (SDR)	short-chain dehydrogenase/reductase (SDR) family protein | chr3:1035500-1036672 FORWARD
BnaA06g24130D	-2.83583	26.22	misc.short chain dehydrogenase/reductase (SDR)	short-chain dehydrogenase/reductase (SDR) family protein | chr5:26050810-26052034 REVERSE
BnaA07g36830D	-2.00564	26.22	misc.short chain dehydrogenase/reductase (SDR)	Symbols: KCR2 | short-chain dehydrogenase/reductase (SDR) family protein | chr1:8674056-8676408 FORWARD
BnaA08g01340D	-1.96277	26.22	misc.short chain dehydrogenase/reductase (SDR)	short-chain dehydrogenase/reductase (SDR) family protein | chr3:327615-329031 REVERSE
BnaA09g21670D	-2.3505	26.22	misc.short chain dehydrogenase/reductase (SDR)	short-chain dehydrogenase/reductase (SDR) family protein | chr4:6944918-6947333 REVERSE
BnaA09g34910D	-3.22894	26.22	misc.short chain dehydrogenase/reductase (SDR)	short-chain dehydrogenase/reductase (SDR) family protein | chr3:20502612-20503797 FORWARD
BnaA10g00200D	-2.3489	26.22	misc.short chain dehydrogenase/reductase (SDR)	short-chain dehydrogenase/reductase (SDR) family protein | chr1:293342-295040 FORWARD
BnaA10g26110D	-1.56544	26.22	misc.short chain dehydrogenase/reductase (SDR)	short-chain dehydrogenase/reductase (SDR) family protein | chr5:1102090-1104446 FORWARD
BnaC03g01820D	-1.318	26.22	misc.short chain dehydrogenase/reductase (SDR)	short-chain dehydrogenase/reductase (SDR) family protein | chr5:1434774-1437330 FORWARD
BnaC03g49110D	-1.61329	26.22	misc.short chain dehydrogenase/reductase (SDR)	short-chain dehydrogenase/reductase (SDR) family protein | chr5:26050810-26052034 REVERSE
BnaC05g47840D	-1.3684	26.22	misc.short chain dehydrogenase/reductase (SDR)	short-chain dehydrogenase/reductase (SDR) family protein | chr3:783332-786209 REVERSE
BnaC07g11110D	-3.48325	26.22	misc.short chain dehydrogenase/reductase (SDR)	Symbols: KCR2 | short-chain dehydrogenase/reductase (SDR) family protein | chr1:8674056-8676408 FORWARD
BnaC07g11120D	-2.19876	26.22	misc.short chain dehydrogenase/reductase (SDR)	Symbols: KCR2 | short-chain dehydrogenase/reductase (SDR) family protein | chr1:8674056-8676408 FORWARD
BnaC08g26120D	-1.3804	26.22	misc.short chain dehydrogenase/reductase (SDR)	short-chain dehydrogenase/reductase (SDR) family protein | chr3:20502612-20503797 FORWARD
BnaC08g33660D	-1.67345	26.22	misc.short chain dehydrogenase/reductase (SDR)	short-chain dehydrogenase/reductase (SDR) family protein | chr2:19347359-19348238 REVERSE
BnaC09g23920D	-1.82387	26.22	misc.short chain dehydrogenase/reductase (SDR)	short-chain dehydrogenase/reductase (SDR) family protein | chr4:6944918-6947333 REVERSE
BnaA09g22880D	1.41259	26.22	misc.short chain dehydrogenase/reductase (SDR)	short-chain dehydrogenase/reductase (SDR) family protein | chr4:6146690-6148814 FORWARD
BnaC08g31160D	2.08318	26.22	misc.short chain dehydrogenase/reductase (SDR)	short-chain dehydrogenase/reductase (SDR) family protein | chr3:22662960-22664493 FORWARD
BnaA04g21510D	2.09424	26.22	misc.short chain dehydrogenase/reductase (SDR)	short-chain dehydrogenase/reductase (SDR) family protein | chr2:15751568-15753967 REVERSE
BnaC09g25870D	2.66413	26.22	misc.short chain dehydrogenase/reductase (SDR)	short-chain dehydrogenase/reductase (SDR) family protein | chr4:6146690-6148814 FORWARD
BnaC09g06430D	1.98936	26.22	misc.short chain dehydrogenase/reductase (SDR)	short-chain dehydrogenase/reductase (SDR) family protein | chr2:15751568-15753967 REVERSE
BnaC02g36330D	1.85563	26.22	misc.short chain dehydrogenase/reductase (SDR)	short-chain dehydrogenase/reductase (SDR) family protein | chr3:9845396-9847148 FORWARD
BnaA02g28260D	3.84723	26.22	misc.short chain dehydrogenase/reductase (SDR)	short-chain dehydrogenase/reductase (SDR) family protein | chr3:9845396-9847148 FORWARD
BnaA01g08000D	-2.1394	26.22	misc.short chain dehydrogenase/reductase (SDR)	Symbols: IBR1, SDRA | IBR1 (INDOLE-3-BUTYRIC ACID RESPONSE 1); binding / catalytic/ oxidoreductase | chr4:2816392-2818365 FORWARD
BnaA01g33800D	-1.51264	26.22	misc.short chain dehydrogenase/reductase (SDR)	short-chain dehydrogenase/reductase (SDR) family protein | chr3:1031742-1033207 FORWARD
BnaA03g00530D	2.12298	26.22	misc.short chain dehydrogenase/reductase (SDR)	short-chain dehydrogenase/reductase (SDR) family protein | chr5:568524-570920 FORWARD
BnaA04g00820D	1.01309	26.22	misc.short chain dehydrogenase/reductase (SDR)	short-chain dehydrogenase/reductase (SDR) family protein | chr3:22662960-22664493 FORWARD
BnaA04g07040D	-9.49852	26.22	misc.short chain dehydrogenase/reductase (SDR)	short-chain dehydrogenase/reductase (SDR) family protein | chr4:7657196-7658197 REVERSE
BnaA05g26380D	1.18058	26.22	misc.short chain dehydrogenase/reductase (SDR)	Symbols: SDRB, DECR | SDRB (SHORT-CHAIN DEHYDROGENASE-REDUCTASE B); binding / catalytic/ oxidoreductase | chr3:4063323-4064822 REVERSE
BnaA05g32580D	-1.15294	26.22	misc.short chain dehydrogenase/reductase (SDR)	short-chain dehydrogenase/reductase (SDR) family protein | chr3:783332-786209 REVERSE
BnaA09g39000D	1.32308	26.22	misc.short chain dehydrogenase/reductase (SDR)	short-chain dehydrogenase/reductase (SDR) family protein | chr3:22662960-22664493 FORWARD
BnaA10g05660D	-2.14684	26.22	misc.short chain dehydrogenase/reductase (SDR)	short-chain dehydrogenase/reductase (SDR) family protein | chr5:20390015-20393263 FORWARD
BnaAnng11700D	-1.7042	26.22	misc.short chain dehydrogenase/reductase (SDR)	short-chain dehydrogenase/reductase (SDR) family protein | chr3:18761088-18764016 REVERSE
BnaAnng24430D	-3.42223	26.22	misc.short chain dehydrogenase/reductase (SDR)	short-chain dehydrogenase/reductase (SDR) family protein | chr3:18761088-18764016 REVERSE
BnaAnng25090D	1.0888	26.22	misc.short chain dehydrogenase/reductase (SDR)	short-chain dehydrogenase/reductase (SDR) family protein | chr4:7684234-7686876 REVERSE
BnaAnng41980D	1.22503	26.22	misc.short chain dehydrogenase/reductase (SDR)	short-chain dehydrogenase/reductase (SDR) family protein | chr4:7684234-7686876 REVERSE
BnaC01g40290D	3.98316	26.22	misc.short chain dehydrogenase/reductase (SDR)	short-chain dehydrogenase/reductase (SDR) family protein | chr3:1031742-1033207 FORWARD
BnaC02g43590D	-2.57719	26.22	misc.short chain dehydrogenase/reductase (SDR)	short-chain dehydrogenase/reductase (SDR) family protein | chr5:26050810-26052034 REVERSE
BnaC03g04080D	-2.61337	26.22	misc.short chain dehydrogenase/reductase (SDR)	short-chain dehydrogenase/reductase (SDR) family protein | chr5:3144200-3145730 FORWARD
BnaC03g37830D	-1.21239	26.22	misc.short chain dehydrogenase/reductase (SDR)	Symbols: SDRB, DECR | SDRB (SHORT-CHAIN DEHYDROGENASE-REDUCTASE B); binding / catalytic/ oxidoreductase | chr3:4063323-4064822 REVERSE
BnaC03g71290D	1.85328	26.22	misc.short chain dehydrogenase/reductase (SDR)	short-chain dehydrogenase/reductase (SDR) family protein | chr5:568524-570920 FORWARD
BnaC09g00510D	-10.7027	26.22	misc.short chain dehydrogenase/reductase (SDR)	binding / catalytic/ oxidoreductase | chr4:1392121-1393842 FORWARD
BnaCnng14630D	1.46447	26.22	misc.short chain dehydrogenase/reductase (SDR)	short-chain dehydrogenase/reductase (SDR) family protein | chr4:7684234-7686876 REVERSE
BnaCnng46610D	-2.27761	26.22	misc.short chain dehydrogenase/reductase (SDR)	short-chain dehydrogenase/reductase (SDR) family protein | chr3:20502612-20503797 FORWARD
BnaCnng48060D	-3.17991	26.22	misc.short chain dehydrogenase/reductase (SDR)	short-chain dehydrogenase/reductase (SDR) family protein | chr3:18761088-18764016 REVERSE
BnaA03g57830D	-1.45066	26.23	misc.rhodanese	rhodanese-like domain-containing protein | chr3:9235196-9236607 REVERSE
BnaA04g23490D	-1.9386	26.23	misc.rhodanese	rhodanese-like domain-containing protein | chr2:17010048-17012067 FORWARD
BnaA05g37090D	-2.12086	26.23	misc.rhodanese	rhodanese-like domain-containing protein | chr3:2712236-2713269 FORWARD
BnaAnng13830D	-1.57417	26.23	misc.rhodanese	rhodanese-like domain-containing protein | chr4:13826374-13827823 REVERSE
BnaC01g20350D	-1.51402	26.23	misc.rhodanese	rhodanese-like domain-containing protein | chr4:13826374-13827823 REVERSE
BnaC03g44540D	-1.19812	26.23	misc.rhodanese	rhodanese-like domain-containing protein | chr3:9235196-9236607 REVERSE
BnaC04g47360D	-2.25142	26.23	misc.rhodanese	rhodanese-like domain-containing protein | chr2:17010048-17012067 FORWARD
BnaA03g07570D	-1.0729	26.23	misc.rhodanese	rhodanese-like domain-containing protein / PPIC-type PPIASE domain-containing protein | chr5:6524120-6526706 REVERSE
BnaC04g48170D	-1.02419	26.23	misc.rhodanese	rhodanese-like domain-containing protein | chr2:17592038-17593500 FORWARD
BnaA01g10340D	-1.70011	26.24	misc.GCN5-related N-acetyltransferase	GCN5-related N-acetyltransferase (GNAT) family protein | chr4:10830237-10832094 REVERSE
BnaA03g06200D	-1.44021	26.24	misc.GCN5-related N-acetyltransferase	GCN5-related N-acetyltransferase (GNAT) family protein | chr5:5524314-5526589 REVERSE
BnaA03g13880D	-1.16802	26.24	misc.GCN5-related N-acetyltransferase	GCN5L1 family protein | chr2:12928767-12929737 REVERSE
BnaA03g48960D	-2.12109	26.24	misc.GCN5-related N-acetyltransferase	GCN5-related N-acetyltransferase (GNAT) family protein | chr4:13937676-13939144 REVERSE
BnaA03g54190D	-2.16294	26.24	misc.GCN5-related N-acetyltransferase	GCN5-related N-acetyltransferase (GNAT) family protein / amino acid kinase family protein | chr4:17696059-17698843 REVERSE
BnaA04g22300D	-1.86904	26.24	misc.GCN5-related N-acetyltransferase	GCN5-related N-acetyltransferase (GNAT) family protein | chr2:16286339-16287970 REVERSE
BnaA04g28860D	-2.42671	26.24	misc.GCN5-related N-acetyltransferase	GCN5-related N-acetyltransferase (GNAT) family protein | chr2:13632468-13633335 REVERSE
BnaA05g06530D	-1.64046	26.24	misc.GCN5-related N-acetyltransferase	Symbols: ATMAK3 | ATMAK3; N-acetyltransferase | chr2:15978512-15980749 REVERSE
BnaA08g22670D	-1.23654	26.24	misc.GCN5-related N-acetyltransferase	GCN5-related N-acetyltransferase (GNAT) family protein | chr1:6309041-6311326 REVERSE
BnaA09g29830D	-1.77082	26.24	misc.GCN5-related N-acetyltransferase	GCN5-related N-acetyltransferase (GNAT) family protein | chr1:8503777-8506795 REVERSE
BnaA10g17680D	-1.50841	26.24	misc.GCN5-related N-acetyltransferase	GCN5-related N-acetyltransferase (GNAT) family protein | chr5:5524314-5526589 REVERSE
BnaA10g18510D	-1.56469	26.24	misc.GCN5-related N-acetyltransferase	Symbols: AtGNA1 | AtGNA1 (Arabidopsis thaliana glucose-6-phosphate acetyltransferase 1); N-acetyltransferase/ glucosamine 6-phosphate N-acetyltransferase | chr5:5144093-5144542 REVERSE
BnaC03g07970D	-1.11589	26.24	misc.GCN5-related N-acetyltransferase	GCN5-related N-acetyltransferase (GNAT) family protein | chr5:5524314-5526589 REVERSE
BnaC03g44940D	-1.70469	26.24	misc.GCN5-related N-acetyltransferase	GCN5-related N-acetyltransferase (GNAT) family protein | chr2:1702221-1704003 REVERSE
BnaC04g07200D	-2.07468	26.24	misc.GCN5-related N-acetyltransferase	Symbols: ATMAK3 | ATMAK3; N-acetyltransferase | chr2:15978512-15980749 REVERSE
BnaC04g42730D	-3.56736	26.24	misc.GCN5-related N-acetyltransferase	GCN5-related N-acetyltransferase (GNAT) family protein | chr2:13632468-13633335 REVERSE
BnaC04g46060D	-1.5112	26.24	misc.GCN5-related N-acetyltransferase	GCN5-related N-acetyltransferase (GNAT) family protein | chr2:16286339-16287970 REVERSE
BnaC05g29050D	-1.54951	26.24	misc.GCN5-related N-acetyltransferase	Symbols: ATNSI | ATNSI (NUCLEAR SHUTTLE INTERACTING); N-acetyltransferase | chr1:11534684-11536338 REVERSE
BnaC05g50810D	-1.30873	26.24	misc.GCN5-related N-acetyltransferase	GCN5-related N-acetyltransferase (GNAT) family protein | chr1:8503777-8506795 REVERSE
BnaC06g05060D	-1.07147	26.24	misc.GCN5-related N-acetyltransferase	GCN5-related N-acetyltransferase (GNAT) family protein | chr4:13937676-13939144 REVERSE
BnaC07g04350D	-1.23269	26.24	misc.GCN5-related N-acetyltransferase	GCN5-related N-acetyltransferase (GNAT) family protein | chr2:2348136-2352157 FORWARD
BnaC07g41170D	-1.07147	26.24	misc.GCN5-related N-acetyltransferase	GCN5-related N-acetyltransferase (GNAT) family protein | chr4:13937676-13939144 REVERSE
BnaC07g46690D	-1.35703	26.24	misc.GCN5-related N-acetyltransferase	GCN5-related N-acetyltransferase (GNAT) family protein / amino acid kinase family protein | chr4:17696059-17698843 REVERSE
BnaC08g17900D	-1.67442	26.24	misc.GCN5-related N-acetyltransferase	GCN5-related N-acetyltransferase (GNAT) family protein | chr1:6309041-6311326 REVERSE
BnaCnng04490D	-1.19732	26.24	misc.GCN5-related N-acetyltransferase	GCN5-related N-acetyltransferase (GNAT) family protein | chr1:9071140-9071861 FORWARD
BnaCnng07680D	-1.50811	26.24	misc.GCN5-related N-acetyltransferase	GCN5-related N-acetyltransferase (GNAT) family protein | chr1:27110865-27111932 FORWARD
BnaCnng53710D	-1.34957	26.24	misc.GCN5-related N-acetyltransferase	GCN5-related N-acetyltransferase (GNAT) family protein | chr4:10830237-10832094 REVERSE
BnaC04g12680D	5.09516	26.24	misc.GCN5-related N-acetyltransferase	GCN5-related N-acetyltransferase (GNAT) family protein | chr2:13631062-13631768 REVERSE
BnaA01g00340D	-2.85798	26.24	misc.GCN5-related N-acetyltransferase	GCN5-related N-acetyltransferase (GNAT) family protein / amino acid kinase family protein | chr4:17696059-17698843 REVERSE
BnaA02g02780D	-2.01057	26.24	misc.GCN5-related N-acetyltransferase	Symbols: AtGNA1 | AtGNA1 (Arabidopsis thaliana glucose-6-phosphate acetyltransferase 1); N-acetyltransferase/ glucosamine 6-phosphate N-acetyltransferase | chr5:5144093-5144542 REVERSE
BnaA04g28870D	10.0679	26.24	misc.GCN5-related N-acetyltransferase	GCN5-related N-acetyltransferase (GNAT) family protein | chr2:13631062-13631768 REVERSE
BnaA08g19670D	-1.10101	26.24	misc.GCN5-related N-acetyltransferase	GCN5-related N-acetyltransferase (GNAT) family protein | chr1:9071140-9071861 FORWARD
BnaC04g42720D	-1.60456	26.24	misc.GCN5-related N-acetyltransferase	GCN5-related N-acetyltransferase (GNAT) family protein | chr2:13631062-13631768 REVERSE
BnaC09g45270D	-1.04803	26.24	misc.GCN5-related N-acetyltransferase	GCN5-related N-acetyltransferase (GNAT) family protein | chr5:3619155-3621301 FORWARD
BnaA06g12720D	-1.4821	26.25	misc.sulfotransferase	Symbols: SOT17, ATSOT17, ATST5C | SOT17 (SULFOTRANSFERASE 17); desulfoglucosinolate sulfotransferase/ sulfotransferase | chr1:6398580-6399942 FORWARD
BnaA07g31230D	-1.02897	26.25	misc.sulfotransferase	Symbols: SOT18, ATSOT18, ATST5B | SOT18 (DESULFO-GLUCOSINOLATE SULFOTRANSFERASE 18); 3-methylthiopropyl-desulfoglucosinolate sulfotransferase/ 4-methylthiobutyl-desulfoglucosinolate sulfotransferase/ 5-methylthiopentyl-desulfoglucosinolate sulfotransferase/ 7-methylthioheptyl-desulfogluco | chr1:27862909-27864193 FORWARD
BnaA07g31260D	-1.79354	26.25	misc.sulfotransferase	Symbols: SOT16, ATSOT16, CORI-7, ATST5A | SOT16 (SULFOTRANSFERASE 16); desulfoglucosinolate sulfotransferase/ sulfotransferase | chr1:27864345-27865694 REVERSE
BnaAnng27200D	-2.33244	26.25	misc.sulfotransferase	Symbols: SOT16, ATSOT16, CORI-7, ATST5A | SOT16 (SULFOTRANSFERASE 16); desulfoglucosinolate sulfotransferase/ sulfotransferase | chr1:27864345-27865694 REVERSE
BnaC02g22640D	-1.50309	26.25	misc.sulfotransferase	Symbols: SOT16, ATSOT16, CORI-7, ATST5A | SOT16 (SULFOTRANSFERASE 16); desulfoglucosinolate sulfotransferase/ sulfotransferase | chr1:27864345-27865694 REVERSE
BnaC06g34930D	-1.01955	26.25	misc.sulfotransferase	Symbols: SOT18, ATSOT18, ATST5B | SOT18 (DESULFO-GLUCOSINOLATE SULFOTRANSFERASE 18); 3-methylthiopropyl-desulfoglucosinolate sulfotransferase/ 4-methylthiobutyl-desulfoglucosinolate sulfotransferase/ 5-methylthiopentyl-desulfoglucosinolate sulfotransferase/ 7-methylthioheptyl-desulfogluco | chr1:27862909-27864193 FORWARD
BnaC06g35000D	-2.61693	26.25	misc.sulfotransferase	Symbols: SOT16, ATSOT16, CORI-7, ATST5A | SOT16 (SULFOTRANSFERASE 16); desulfoglucosinolate sulfotransferase/ sulfotransferase | chr1:27864345-27865694 REVERSE
BnaA09g14900D	2.32388	26.25	misc.sulfotransferase	Symbols: SOT18, ATSOT18, ATST5B | SOT18 (DESULFO-GLUCOSINOLATE SULFOTRANSFERASE 18); 3-methylthiopropyl-desulfoglucosinolate sulfotransferase/ 4-methylthiobutyl-desulfoglucosinolate sulfotransferase/ 5-methylthiopentyl-desulfoglucosinolate sulfotransferase/ 7-methylthioheptyl-desulfogluco | chr1:27862909-27864193 FORWARD
BnaC05g14270D	-1.49354	26.25	misc.sulfotransferase	Symbols: SOT17, ATSOT17, ATST5C | SOT17 (SULFOTRANSFERASE 17); desulfoglucosinolate sulfotransferase/ sulfotransferase | chr1:6398580-6399942 FORWARD
BnaC09g15510D	1.44488	26.25	misc.sulfotransferase	Symbols: SOT18, ATSOT18, ATST5B | SOT18 (DESULFO-GLUCOSINOLATE SULFOTRANSFERASE 18); 3-methylthiopropyl-desulfoglucosinolate sulfotransferase/ 4-methylthiobutyl-desulfoglucosinolate sulfotransferase/ 5-methylthiopentyl-desulfoglucosinolate sulfotransferase/ 7-methylthioheptyl-desulfogluco | chr1:27862909-27864193 FORWARD
BnaCnng14860D	-3.39917	26.25	misc.sulfotransferase	Symbols: SOT17, ATSOT17, ATST5C | SOT17 (SULFOTRANSFERASE 17); desulfoglucosinolate sulfotransferase/ sulfotransferase | chr1:6398580-6399942 FORWARD
BnaA08g01030D	-1.3299	26.27	misc.calcineurin-like phosphoesterase family protein	hydrolase/ protein serine/threonine phosphatase | chr1:20053161-20056396 REVERSE
BnaC03g69880D	-1.79267	26.27	misc.calcineurin-like phosphoesterase family protein	hydrolase/ protein serine/threonine phosphatase | chr1:20053161-20056396 REVERSE
BnaC04g00570D	-2.5656	26.27	misc.calcineurin-like phosphoesterase family protein	Symbols: ATPAP14, PAP14 | PAP14 (PURPLE ACID PHOSPHATASE 14); acid phosphatase/ protein serine/threonine phosphatase | chr2:19264573-19266446 REVERSE
BnaC05g14160D	-1.60162	26.27	misc.calcineurin-like phosphoesterase family protein	calcineurin-like phosphoesterase family protein | chr1:6361629-6363007 FORWARD
BnaC07g37770D	-1.88952	26.27	misc.calcineurin-like phosphoesterase family protein	hydrolase/ protein serine/threonine phosphatase | chr4:12054455-12060028 FORWARD
BnaA10g04470D	1.87782	26.27	misc.calcineurin-like phosphoesterase family protein	calcineurin-like phosphoesterase family protein | chr1:2152880-2155238 FORWARD
BnaA06g12600D	-1.02799	26.27	misc.calcineurin-like phosphoesterase family protein	calcineurin-like phosphoesterase family protein | chr1:6361629-6363007 FORWARD
BnaA06g20670D	-1.20199	26.27	misc.calcineurin-like phosphoesterase family protein	Symbols: MAG1 | MAG1 (MAIGO 1); hydrolase/ protein serine/threonine phosphatase | chr3:17637129-17639606 REVERSE
BnaA01g08120D	-1.49754	26.28	misc.GDSL-motif lipase	GDSL-motif lipase/hydrolase family protein | chr4:14215545-14217579 FORWARD
BnaA01g15910D	-5.50064	26.28	misc.GDSL-motif lipase	GDSL-motif lipase/hydrolase family protein | chr4:13487457-13489371 FORWARD
BnaA02g04090D	-1.25421	26.28	misc.GDSL-motif lipase	GDSL-motif lipase/hydrolase family protein | chr5:6110255-6112029 REVERSE
BnaA02g24180D	-3.59727	26.28	misc.GDSL-motif lipase	GDSL-motif lipase/hydrolase family protein | chr5:18637023-18640361 REVERSE
BnaA03g43830D	-2.79414	26.28	misc.GDSL-motif lipase	GDSL-motif lipase/hydrolase family protein | chr4:10389111-10390917 REVERSE
BnaA05g20720D	-2.39328	26.28	misc.GDSL-motif lipase	GDSL-motif lipase/hydrolase family protein | chr1:12267866-12269913 FORWARD
BnaA05g25220D	-2.64829	26.28	misc.GDSL-motif lipase	Symbols: GLIP4 | GLIP4; carboxylesterase/ lipase | chr3:4734616-4735993 REVERSE
BnaA05g33110D	-3.2157	26.28	misc.GDSL-motif lipase	Symbols: ATLTL1, LTL1 | LTL1 (LI-TOLERANT LIPASE 1); carboxylesterase/ hydrolase, acting on ester bonds | chr3:1133320-1136316 REVERSE
BnaA06g22400D	-1.85576	26.28	misc.GDSL-motif lipase	GDSL-motif lipase/hydrolase family protein | chr5:25254888-25256617 FORWARD
BnaA06g32900D	-1.80308	26.28	misc.GDSL-motif lipase	GDSL-motif lipase/hydrolase family protein | chr3:9671517-9675927 FORWARD
BnaA07g07790D	-2.79066	26.28	misc.GDSL-motif lipase	GDSL-motif lipase/hydrolase family protein | chr1:10371839-10373766 FORWARD
BnaA07g08260D	-3.04731	26.28	misc.GDSL-motif lipase	GDSL-motif lipase, putative | chr1:10044337-10046442 REVERSE
BnaA07g08280D	-1.8609	26.28	misc.GDSL-motif lipase	GDSL-motif lipase, putative | chr1:10044337-10046442 REVERSE
BnaA09g15250D	-1.14475	26.28	misc.GDSL-motif lipase	GDSL-motif lipase/hydrolase family protein | chr1:21241673-21244047 FORWARD
BnaA09g16180D	-1.60218	26.28	misc.GDSL-motif lipase	GDSL-motif lipase/hydrolase family protein | chr5:915465-918485 FORWARD
BnaA09g27150D	-1.58842	26.28	misc.GDSL-motif lipase	lipase, putative | chr2:11706198-11708065 FORWARD
BnaAnng40320D	-2.23323	26.28	misc.GDSL-motif lipase	GDSL-motif lipase/hydrolase family protein | chr1:10375763-10377871 FORWARD
BnaC01g09700D	-2.10868	26.28	misc.GDSL-motif lipase	GDSL-motif lipase/hydrolase family protein | chr4:14215545-14217579 FORWARD
BnaC01g19020D	-3.47191	26.28	misc.GDSL-motif lipase	GDSL-motif lipase/hydrolase family protein | chr4:13487457-13489371 FORWARD
BnaC02g32010D	-2.63139	26.28	misc.GDSL-motif lipase	GDSL-motif lipase/hydrolase family protein | chr5:18637023-18640361 REVERSE
BnaC03g01340D	-1.93754	26.28	misc.GDSL-motif lipase	GDSL-motif lipase/hydrolase family protein | chr5:915465-918485 FORWARD
BnaC03g33650D	-5.07278	26.28	misc.GDSL-motif lipase	Symbols: ATLTL1, LTL1 | LTL1 (LI-TOLERANT LIPASE 1); carboxylesterase/ hydrolase, acting on ester bonds | chr3:1133320-1136316 REVERSE
BnaC03g51320D	-1.35842	26.28	misc.GDSL-motif lipase	GDSL-motif lipase/hydrolase family protein | chr5:25254888-25256617 FORWARD
BnaC04g38570D	-1.93784	26.28	misc.GDSL-motif lipase	carboxylesterase/ hydrolase/ hydrolase, acting on ester bonds | chr5:18622759-18624785 FORWARD
BnaC05g21950D	-1.97699	26.28	misc.GDSL-motif lipase	GDSL-motif lipase, putative | chr1:10044337-10046442 REVERSE
BnaC05g28210D	-1.84398	26.28	misc.GDSL-motif lipase	GDSL-motif lipase/hydrolase family protein | chr1:12267866-12269913 FORWARD
BnaC05g39430D	-4.03789	26.28	misc.GDSL-motif lipase	Symbols: GLIP4 | GLIP4; carboxylesterase/ lipase | chr3:4734616-4735993 REVERSE
BnaC05g46600D	-1.81943	26.28	misc.GDSL-motif lipase	GDSL-motif lipase/hydrolase family protein | chr3:1468398-1470551 REVERSE
BnaC07g09690D	-2.93102	26.28	misc.GDSL-motif lipase	GDSL-motif lipase/hydrolase family protein | chr1:10371839-10373766 FORWARD
BnaC07g10250D	-2.90495	26.28	misc.GDSL-motif lipase	GDSL-motif lipase, putative | chr1:10044337-10046442 REVERSE
BnaC07g10260D	-1.44989	26.28	misc.GDSL-motif lipase	GDSL-motif lipase, putative | chr1:10041641-10044147 REVERSE
BnaC07g23580D	-2.49333	26.28	misc.GDSL-motif lipase	GDSL-motif lipase/hydrolase family protein | chr3:9671517-9675927 FORWARD
BnaC03g53090D	3.02544	26.28	misc.GDSL-motif lipase	GDSL-motif lipase/hydrolase family protein | chr3:17949445-17951195 FORWARD
BnaA03g17630D	2.12369	26.28	misc.GDSL-motif lipase	GDSL-motif lipase/hydrolase family protein | chr2:15997114-15998906 FORWARD
BnaA06g18900D	3.3222	26.28	misc.GDSL-motif lipase	GDSL-motif lipase/hydrolase family protein | chr3:17949445-17951195 FORWARD
BnaC03g69950D	2.02873	26.28	misc.GDSL-motif lipase	Symbols: GLIP5 | GLIP5; carboxylesterase/ lipase | chr1:20137712-20139637 FORWARD
BnaC03g71620D	3.04011	26.28	misc.GDSL-motif lipase	GDSL-motif lipase/hydrolase family protein | chr5:22337701-22340100 FORWARD
BnaA03g11620D	2.47763	26.28	misc.GDSL-motif lipase	GDSL-motif lipase/hydrolase family protein | chr5:22337701-22340100 FORWARD
BnaA04g15580D	-2.36923	26.28	misc.GDSL-motif lipase	carboxylesterase/ hydrolase/ hydrolase, acting on ester bonds | chr5:18622759-18624785 FORWARD
BnaA04g21860D	1.69076	26.28	misc.GDSL-motif lipase	GDSL-motif lipase/hydrolase family protein | chr2:15997114-15998906 FORWARD
BnaA06g37930D	-2.09142	26.28	misc.GDSL-motif lipase	GDSL-motif lipase/hydrolase family protein | chr1:3031203-3033582 FORWARD
BnaA07g08290D	-1.44113	26.28	misc.GDSL-motif lipase	GDSL-motif lipase, putative | chr1:10041641-10044147 REVERSE
BnaA08g07360D	-5.03342	26.28	misc.GDSL-motif lipase	GDSL-motif lipase/hydrolase family protein | chr5:12602468-12604764 REVERSE
BnaA08g13200D	1.71349	26.28	misc.GDSL-motif lipase	GDSL-motif lipase/hydrolase family protein | chr4:14738387-14740676 REVERSE
BnaAnng00730D	-1.19666	26.28	misc.GDSL-motif lipase	GDSL-motif lipase/hydrolase family protein | chr5:915465-918485 FORWARD
BnaC03g44180D	1.55793	26.28	misc.GDSL-motif lipase	GDSL-motif lipase/hydrolase family protein | chr2:1594673-1596349 FORWARD
BnaC03g59260D	-2.89111	26.28	misc.GDSL-motif lipase	GDSL-motif lipase/hydrolase family protein | chr1:10371839-10373766 FORWARD
BnaC04g45730D	1.11624	26.28	misc.GDSL-motif lipase	GDSL-motif lipase/hydrolase family protein | chr2:15997114-15998906 FORWARD
BnaC08g08210D	-7.86625	26.28	misc.GDSL-motif lipase	GDSL-motif lipase/hydrolase family protein | chr5:12602468-12604764 REVERSE
BnaC09g17000D	-1.95554	26.28	misc.GDSL-motif lipase	GDSL-motif lipase/hydrolase family protein | chr5:915465-918485 FORWARD
BnaCnng34700D	-1.46973	26.28	misc.GDSL-motif lipase	GDSL-motif lipase/hydrolase family protein | chr5:18528494-18530450 FORWARD
BnaA01g27000D	-3.5002	26.3	misc.gluco-, galacto- and mannosidases	Symbols: BGLU44 | BGLU44 (B-S GLUCOSIDASE 44); (R)-amygdalin beta-glucosidase/ 4-methylumbelliferyl-beta-D-glucopyranoside beta-glucosidase/ beta-gentiobiose beta-glucosidase/ cellobiose glucosidase/ esculin beta-glucosidase/ hydrolase, hydrolyzing O-glycosyl compounds | chr3:6191557-6194452 FORWARD
BnaA01g27010D	-1.41063	26.3	misc.gluco-, galacto- and mannosidases	Symbols: BGLU44 | BGLU44 (B-S GLUCOSIDASE 44); (R)-amygdalin beta-glucosidase/ 4-methylumbelliferyl-beta-D-glucopyranoside beta-glucosidase/ beta-gentiobiose beta-glucosidase/ cellobiose glucosidase/ esculin beta-glucosidase/ hydrolase, hydrolyzing O-glycosyl compounds | chr3:6191557-6194452 FORWARD
BnaA03g01500D	-2.23447	26.3	misc.gluco-, galacto- and mannosidases	glycosyl hydrolase family 3 protein | chr5:1422799-1426879 FORWARD
BnaA03g08170D	-4.16993	26.3	misc.gluco-, galacto- and mannosidases	glycosyl hydrolase family 3 protein | chr5:7103927-7106701 REVERSE
BnaA03g44890D	-2.8953	26.3	misc.gluco-, galacto- and mannosidases	Symbols: BGLU47 | BGLU47 (Beta-glucosidase 47); catalytic/ cation binding / hydrolase, hydrolyzing O-glycosyl compounds | chr4:11561229-11563950 FORWARD
BnaA04g17070D	-4.33787	26.3	misc.gluco-, galacto- and mannosidases	Symbols: BGLU13 | BGLU13 (BETA GLUCOSIDASE 13); catalytic/ cation binding / hydrolase, hydrolyzing O-glycosyl compounds | chr5:18011146-18012882 FORWARD
BnaA06g01540D	-1.22545	26.3	misc.gluco-, galacto- and mannosidases	Symbols: BGL1, BGLU18 | BGLU18 (BETA GLUCOSIDASE 18); catalytic/ cation binding / hydrolase, hydrolyzing O-glycosyl compounds | chr1:19515151-19518160 FORWARD
BnaA06g05250D	-1.68255	26.3	misc.gluco-, galacto- and mannosidases	glycoside hydrolase family 2 protein | chr1:2895166-2899384 REVERSE
BnaA07g24990D	-2.18911	26.3	misc.gluco-, galacto- and mannosidases	Symbols: GCS1, KNF | GCS1 (GLUCOSIDASE 1); alpha-glucosidase | chr1:25280451-25286596 REVERSE
BnaA10g08370D	-1.15754	26.3	misc.gluco-, galacto- and mannosidases	Symbols: BGLU41 | BGLU41 (BETA GLUCOSIDASE 41); catalytic/ cation binding / hydrolase, hydrolyzing O-glycosyl compounds | chr5:22167636-22170235 REVERSE
BnaC01g34490D	-3.62411	26.3	misc.gluco-, galacto- and mannosidases	Symbols: BGLU44 | BGLU44 (B-S GLUCOSIDASE 44); (R)-amygdalin beta-glucosidase/ 4-methylumbelliferyl-beta-D-glucopyranoside beta-glucosidase/ beta-gentiobiose beta-glucosidase/ cellobiose glucosidase/ esculin beta-glucosidase/ hydrolase, hydrolyzing O-glycosyl compounds | chr3:6191557-6194452 FORWARD
BnaC03g01800D	-3.1867	26.3	misc.gluco-, galacto- and mannosidases	glycosyl hydrolase family 3 protein | chr5:1422799-1426879 FORWARD
BnaC04g40390D	-2.70571	26.3	misc.gluco-, galacto- and mannosidases	Symbols: BGLU13 | BGLU13 (BETA GLUCOSIDASE 13); catalytic/ cation binding / hydrolase, hydrolyzing O-glycosyl compounds | chr5:18011146-18012882 FORWARD
BnaC05g06540D	-2.63086	26.3	misc.gluco-, galacto- and mannosidases	glycoside hydrolase family 2 protein | chr1:2895166-2899384 REVERSE
BnaC05g20280D	-1.33675	26.3	misc.gluco-, galacto- and mannosidases	Symbols: BGLU40 | BGLU40 (BETA GLUCOSIDASE 40); catalytic/ cation binding / hydrolase, hydrolyzing O-glycosyl compounds | chr1:9178378-9181835 FORWARD
BnaC05g21330D	-2.1968	26.3	misc.gluco-, galacto- and mannosidases	glycoside hydrolase family 47 protein | chr1:9558635-9562381 FORWARD
BnaC06g12100D	-1.75987	26.3	misc.gluco-, galacto- and mannosidases	Symbols: BGLU42 | BGLU42 (BETA GLUCOSIDASE 42); beta-glucosidase/ catalytic/ cation binding / hydrolase, hydrolyzing O-glycosyl compounds | chr5:14542026-14546230 REVERSE
BnaC06g26720D	-2.50373	26.3	misc.gluco-, galacto- and mannosidases	Symbols: GCS1, KNF | GCS1 (GLUCOSIDASE 1); alpha-glucosidase | chr1:25280451-25286596 REVERSE
BnaC07g00200D	-2.20286	26.3	misc.gluco-, galacto- and mannosidases	glycosyl hydrolase family 5 protein / cellulase family protein | chr2:8920467-8923173 FORWARD
BnaCnng06540D	-2.40232	26.3	misc.gluco-, galacto- and mannosidases	glycoside hydrolase family 2 protein | chr1:2895166-2899384 REVERSE
BnaA07g05100D	1.06922	26.3	misc.gluco-, galacto- and mannosidases	Symbols: BGLU8 | BGLU8 (BETA GLUCOSIDASE 8); catalytic/ cation binding / hydrolase, hydrolyzing O-glycosyl compounds | chr3:23214371-23217045 FORWARD
BnaC01g40610D	4.0867	26.3	misc.gluco-, galacto- and mannosidases	Symbols: GLUC, BGLU25 | BGLU25 (BETA GLUCOSIDASE 25); catalytic/ cation binding / hydrolase, hydrolyzing O-glycosyl compounds | chr3:881006-884157 FORWARD
BnaA07g05110D	1.63136	26.3	misc.gluco-, galacto- and mannosidases	Symbols: BGLU8 | BGLU8 (BETA GLUCOSIDASE 8); catalytic/ cation binding / hydrolase, hydrolyzing O-glycosyl compounds | chr3:23214371-23217045 FORWARD
BnaA01g34060D	1.19805	26.3	misc.gluco-, galacto- and mannosidases	Symbols: GLUC, BGLU25 | BGLU25 (BETA GLUCOSIDASE 25); catalytic/ cation binding / hydrolase, hydrolyzing O-glycosyl compounds | chr3:881006-884157 FORWARD
BnaUnng03130D	1.31302	26.3	misc.gluco-, galacto- and mannosidases	Symbols: BGLU13 | BGLU13 (BETA GLUCOSIDASE 13); catalytic/ cation binding / hydrolase, hydrolyzing O-glycosyl compounds | chr5:18011146-18012882 FORWARD
BnaC04g03740D	1.15685	26.3	misc.gluco-, galacto- and mannosidases	Symbols: BGLU15 | BGLU15 (BETA GLUCOSIDASE 15); catalytic/ cation binding / hydrolase, hydrolyzing O-glycosyl compounds | chr2:18340921-18343849 FORWARD
BnaA04g25720D	1.24049	26.3	misc.gluco-, galacto- and mannosidases	Symbols: BGLU15 | BGLU15 (BETA GLUCOSIDASE 15); catalytic/ cation binding / hydrolase, hydrolyzing O-glycosyl compounds | chr2:18340921-18343849 FORWARD
BnaA10g00970D	6.96438	26.3	misc.gluco-, galacto- and mannosidases	glycosyl hydrolase family protein 5 / cellulase family protein / (1-4)-beta-mannan endohydrolase, putative | chr1:458133-460696 REVERSE
BnaC05g01080D	6.59991	26.3	misc.gluco-, galacto- and mannosidases	glycosyl hydrolase family protein 5 / cellulase family protein / (1-4)-beta-mannan endohydrolase, putative | chr1:458133-460696 REVERSE
BnaA07g05140D	1.23396	26.3	misc.gluco-, galacto- and mannosidases	Symbols: BGLU10 | BGLU10 (BETA GLUCOSIDASE 10); catalytic/ cation binding / hydrolase, hydrolyzing O-glycosyl compounds | chr4:13861718-13864500 REVERSE
BnaA09g55490D	-1.09576	26.3	misc.gluco-, galacto- and mannosidases	Symbols: BGLU27 | BGLU27 (BETA GLUCOSIDASE 27); catalytic/ cation binding / hydrolase, hydrolyzing O-glycosyl compounds | chr3:22205947-22208952 FORWARD
BnaC01g34500D	-3.70044	26.3	misc.gluco-, galacto- and mannosidases	Symbols: BGLU43 | BGLU43 (BETA GLUCOSIDASE 43); catalytic/ cation binding / hydrolase, hydrolyzing O-glycosyl compounds | chr3:6187294-6189947 FORWARD
BnaC04g03750D	2.20436	26.3	misc.gluco-, galacto- and mannosidases	Symbols: BGLU15 | BGLU15 (BETA GLUCOSIDASE 15); catalytic/ cation binding / hydrolase, hydrolyzing O-glycosyl compounds | chr2:18340921-18343849 FORWARD
BnaC04g22390D	10.1716	26.3	misc.gluco-, galacto- and mannosidases	Symbols: DIN2, SRG2, BGLU30 | DIN2 (DARK INDUCIBLE 2); catalytic/ cation binding / hydrolase, hydrolyzing O-glycosyl compounds | chr3:22216672-22220824 FORWARD
BnaC04g30040D	-1.04186	26.3	misc.gluco-, galacto- and mannosidases	Symbols: BGLU42 | BGLU42 (BETA GLUCOSIDASE 42); beta-glucosidase/ catalytic/ cation binding / hydrolase, hydrolyzing O-glycosyl compounds | chr5:14542026-14546230 REVERSE
BnaC05g01470D	2.96829	26.3	misc.gluco-, galacto- and mannosidases	Symbols: BGLU11 | BGLU11 (BETA GLUCOSIDASE 11); catalytic/ cation binding / hydrolase, hydrolyzing O-glycosyl compounds | chr1:630505-633259 FORWARD
BnaC05g45310D	2.42501	26.3	misc.gluco-, galacto- and mannosidases	Symbols: SFR2 | SFR2 (SENSITIVE TO FREEZING 2); beta-glucosidase/ hydrolase, hydrolyzing O-glycosyl compounds | chr3:2016385-2019677 FORWARD
BnaC08g30380D	-3.57154	26.3	misc.gluco-, galacto- and mannosidases	Symbols: BGLU16 | BGLU16 (BETA GLUCOSIDASE 16); catalytic/ cation binding / hydrolase, hydrolyzing O-glycosyl compounds | chr3:22210246-22213840 FORWARD
BnaC08g32450D	2.16273	26.3	misc.gluco-, galacto- and mannosidases	Symbols: BGLU10 | BGLU10 (BETA GLUCOSIDASE 10); catalytic/ cation binding / hydrolase, hydrolyzing O-glycosyl compounds | chr4:13861718-13864500 REVERSE
BnaC08g36230D	-4.36457	26.3	misc.gluco-, galacto- and mannosidases	glycosyl hydrolase family 5 protein / cellulase family protein | chr2:8920467-8923173 FORWARD
BnaA01g34890D	-4.25214	26.4	misc.beta 1,3 glucan hydrolases	glycosyl hydrolase family 17 protein | chr4:14451421-14453915 REVERSE
BnaA04g17980D	-3.54844	26.4	misc.beta 1,3 glucan hydrolases	FUNCTIONS IN: molecular_function unknown; INVOLVED IN: biological_process unknown; LOCATED IN: endomembrane system; CONTAINS InterPro DOMAIN/s: X8 (InterPro:IPR012946); BEST Arabidopsis thaliana protein match is: unknown protein (TAIR:AT1G29380.1); Has 799 Blast hits to 763 proteins in 42 species: Archae - 0; Bacteria - 0; Metazoa - 0; Fungi - 23; Plants - 773; Viruses - 0; Other Eukaryotes - 3 (…
BnaA06g12810D	-4.75475	26.4	misc.beta 1,3 glucan hydrolases	Symbols: PDCB3 | PDCB3 (PLASMODESMATA CALLOSE-BINDING PROTEIN 3); callose binding / polysaccharide binding | chr1:6418858-6420557 REVERSE
BnaA07g37930D	-2.32567	26.4	misc.beta 1,3 glucan hydrolases	Symbols: PDCB5 | PDCB5 (PLASMODESMATA CALLOSE-BINDING PROTEIN 5); callose binding / polysaccharide binding | chr3:21515199-21516487 REVERSE
BnaA08g13450D	-4.5518	26.4	misc.beta 1,3 glucan hydrolases	glycosyl hydrolase family 17 protein | chr4:14451421-14453915 REVERSE
BnaA08g22500D	-2.90805	26.4	misc.beta 1,3 glucan hydrolases	Symbols: PDCB3 | PDCB3 (PLASMODESMATA CALLOSE-BINDING PROTEIN 3); callose binding / polysaccharide binding | chr1:6418858-6420557 REVERSE
BnaA10g11860D	-3.28824	26.4	misc.beta 1,3 glucan hydrolases	glycosyl hydrolase family 17 protein | chr5:23641142-23642853 REVERSE
BnaC03g56580D	-3.59631	26.4	misc.beta 1,3 glucan hydrolases	beta-1,3-glucanase-related | chr1:4739873-4741038 REVERSE
BnaC03g77660D	-3.86382	26.4	misc.beta 1,3 glucan hydrolases	glycosyl hydrolase family 17 protein | chr4:14451421-14453915 REVERSE
BnaC05g07010D	-8.95613	26.4	misc.beta 1,3 glucan hydrolases	glucan endo-1,3-beta-glucosidase-related | chr1:3053901-3055360 FORWARD
BnaC05g14330D	-3.73075	26.4	misc.beta 1,3 glucan hydrolases	Symbols: PDCB3 | PDCB3 (PLASMODESMATA CALLOSE-BINDING PROTEIN 3); callose binding / polysaccharide binding | chr1:6418858-6420557 REVERSE
BnaC06g16250D	-2.34236	26.4	misc.beta 1,3 glucan hydrolases	Symbols: PDCB5 | PDCB5 (PLASMODESMATA CALLOSE-BINDING PROTEIN 5); callose binding / polysaccharide binding | chr3:21515199-21516487 REVERSE
BnaC07g11250D	-3.70044	26.4	misc.beta 1,3 glucan hydrolases	alpha-glucosidase, putative | chr1:8626315-8630971 REVERSE
BnaC08g18190D	-4.73433	26.4	misc.beta 1,3 glucan hydrolases	Symbols: PDCB3 | PDCB3 (PLASMODESMATA CALLOSE-BINDING PROTEIN 3); callose binding / polysaccharide binding | chr1:6418858-6420557 REVERSE
BnaCnng46030D	-1.37834	26.4	misc.beta 1,3 glucan hydrolases	beta-1,3-glucanase-related | chr1:9148710-9150250 REVERSE
BnaC06g30470D	2.82826	26.4	misc.beta 1,3 glucan hydrolases	beta-1,3-glucanase-related | chr1:9148710-9150250 REVERSE
BnaA01g06030D	4.36971	26.4	misc.beta 1,3 glucan hydrolases	glycosyl hydrolase family 17 protein | chr4:15141200-15143391 FORWARD
BnaA03g11520D	2.26585	26.4	misc.beta 1,3 glucan hydrolases	glycosyl hydrolase family 17 protein | chr5:22388782-22390714 FORWARD
BnaC01g07290D	5.29711	26.4	misc.beta 1,3 glucan hydrolases	glycosyl hydrolase family 17 protein | chr4:15141200-15143391 FORWARD
BnaC03g14350D	2.43664	26.4	misc.beta 1,3 glucan hydrolases	glycosyl hydrolase family 17 protein | chr5:22388782-22390714 FORWARD
BnaC09g31740D	7.19908	26.4	misc.beta 1,3 glucan hydrolases	glycosyl hydrolase family 17 protein | chr5:22388782-22390714 FORWARD
BnaA02g09200D	6.3951	26.4	misc.beta 1,3 glucan hydrolases	glycosyl hydrolase family 17 protein | chr5:22388782-22390714 FORWARD
BnaC02g13250D	7.09811	26.4	misc.beta 1,3 glucan hydrolases	glycosyl hydrolase family 17 protein | chr5:22388782-22390714 FORWARD
BnaA10g09420D	8.18405	26.4	misc.beta 1,3 glucan hydrolases	glycosyl hydrolase family 17 protein | chr5:22388782-22390714 FORWARD
BnaA02g14700D	-4.15344	26.4	misc.beta 1,3 glucan hydrolases	Symbols: PDCB4 | PDCB4 (PLASMODESMATA CALLOSE-BINDING PROTEIN 4); callose binding / polysaccharide binding | chr1:26050197-26052567 REVERSE
BnaA06g08850D	1.81266	26.4	misc.beta 1,3 glucan hydrolases	beta-1,3-glucanase-related | chr1:4739873-4741038 REVERSE
BnaA06g37900D	-2.56071	26.4	misc.beta 1,3 glucan hydrolases	glucan endo-1,3-beta-glucosidase-related | chr1:3053901-3055360 FORWARD
BnaA08g24230D	-1.23375	26.4	misc.beta 1,3 glucan hydrolases	beta-1,3-glucanase-related | chr1:4739873-4741038 REVERSE
BnaA03g15820D	-1.68658	26.5	misc.acyl transferases	O-acetyltransferase family protein | chr2:14518406-14522139 FORWARD
BnaA03g26860D	-1.50061	26.5	misc.acyl transferases	acetylesterase, putative | chr4:485833-488007 FORWARD
BnaA03g41350D	-3.50553	26.5	misc.acyl transferases	diacylglycerol acyltransferase family | chr3:19110596-19112760 FORWARD
BnaA07g35650D	-1.04546	26.5	misc.acyl transferases	Symbols: EMB2753 | EMB2753 (EMBRYO DEFECTIVE 2753); binding | chr1:30227485-30234981 REVERSE
BnaC01g23350D	-1.04969	26.5	misc.acyl transferases	diacylglycerol acyltransferase family | chr3:19110596-19112760 FORWARD
BnaC03g18970D	-2.23163	26.5	misc.acyl transferases	O-acetyltransferase family protein | chr2:14518406-14522139 FORWARD
BnaC03g31810D	-1.79666	26.5	misc.acyl transferases	acetylesterase, putative | chr4:485833-488007 FORWARD
BnaC06g19640D	-2.05166	26.5	misc.acyl transferases	phospholipid/glycerol acyltransferase family protein | chr1:30412544-30415113 REVERSE
BnaA07g20190D	-1.99035	26.5	misc.acyl transferases	phospholipid/glycerol acyltransferase family protein | chr1:30412544-30415113 REVERSE
BnaC06g27060D	1.74351	26.5	misc.acyl transferases	transferase family protein | chr1:24317864-24319064 FORWARD
BnaC06g40070D	1.00058	26.5	misc.acyl transferases	phospholipid/glycerol acyltransferase family protein | chr1:30412544-30415113 REVERSE
BnaC06g40590D	-2.00561	26.5	misc.acyl transferases	Symbols: EMB2753 | EMB2753 (EMBRYO DEFECTIVE 2753); binding | chr1:30227485-30234981 REVERSE
BnaA01g35410D	-1.73595	26.6	misc.O-methyl transferases	Symbols: ATPRMT7, PRMT7 | PRMT7 (PROTEIN ARGININE METHYLTRANSFERASE 7); methyltransferase | chr4:9336703-9340869 FORWARD
BnaA04g04870D	-1.084	26.6	misc.O-methyl transferases	O-diphenol-O-methyl transferase, putative | chr3:19695643-19697542 FORWARD
BnaA05g30580D	-3.43577	26.6	misc.O-methyl transferases	Symbols: ATPRMT4B, PRMT4B | protein arginine N-methyltransferase family protein | chr3:2185143-2189387 REVERSE
BnaA06g14950D	-2.77349	26.6	misc.O-methyl transferases	O-methyltransferase, putative | chr1:7399062-7400605 REVERSE
BnaA07g11070D	-5.69454	26.6	misc.O-methyl transferases	O-methyltransferase, putative | chr1:7386839-7388428 REVERSE
BnaA07g28060D	-2.50486	26.6	misc.O-methyl transferases	S-adenosyl-L-methionine-dependent methyltransferases superfamily protein; FUNCTIONS IN: methyltransferase activity; INVOLVED IN: metabolic process; LOCATED IN: chloroplast; EXPRESSED IN: 20 plant structures; EXPRESSED DURING: 13 growth stages; CONTAINS InterPro DOMAIN/s: Methyltransferase type 11 (InterPro:IPR013216); BEST Arabidopsis thaliana protein match is: S-adenosyl-L-methionine-dependent m…
BnaA08g21470D	-5.68691	26.6	misc.O-methyl transferases	O-methyltransferase, putative | chr1:7399062-7400605 REVERSE
BnaC01g06690D	-1.24515	26.6	misc.O-methyl transferases	diphthine synthase, putative (DPH5) | chr4:15377211-15379025 FORWARD
BnaC01g19790D	-1.56847	26.6	misc.O-methyl transferases	Symbols: ATPRMT7, PRMT7 | PRMT7 (PROTEIN ARGININE METHYLTRANSFERASE 7); methyltransferase | chr4:9336703-9340869 FORWARD
BnaC03g37480D	-1.2362	26.6	misc.O-methyl transferases	Symbols: ATPRMT3, PRMT3 | PRMT3 (PROTEIN ARGININE METHYLTRANSFERASE 3); methyltransferase/ zinc ion binding | chr3:3910633-3913329 FORWARD
BnaC05g45040D	-1.04783	26.6	misc.O-methyl transferases	Symbols: ATPRMT4B, PRMT4B | protein arginine N-methyltransferase family protein | chr3:2185143-2189387 REVERSE
BnaC06g30740D	-1.67158	26.6	misc.O-methyl transferases	S-adenosyl-L-methionine-dependent methyltransferases superfamily protein; FUNCTIONS IN: methyltransferase activity; INVOLVED IN: metabolic process; LOCATED IN: chloroplast; EXPRESSED IN: 20 plant structures; EXPRESSED DURING: 13 growth stages; CONTAINS InterPro DOMAIN/s: Methyltransferase type 11 (InterPro:IPR013216); BEST Arabidopsis thaliana protein match is: S-adenosyl-L-methionine-dependent m…
BnaC07g14640D	-3.75358	26.6	misc.O-methyl transferases	O-methyltransferase, putative | chr1:7386839-7388428 REVERSE
BnaC08g19680D	-4.56701	26.6	misc.O-methyl transferases	O-methyltransferase, putative | chr1:7386839-7388428 REVERSE
BnaC08g19690D	-1.38873	26.6	misc.O-methyl transferases	O-methyltransferase, putative | chr1:7395228-7396773 REVERSE
BnaC08g39960D	-4.36257	26.6	misc.O-methyl transferases	diphthine synthase, putative (DPH5) | chr4:15377211-15379025 FORWARD
BnaCnng14540D	-4.74894	26.6	misc.O-methyl transferases	diphthine synthase, putative (DPH5) | chr4:15377211-15379025 FORWARD
BnaCnng71640D	-1.86192	26.6	misc.O-methyl transferases	Symbols: PRMT10, ATPRMT10 | PRMT10; [myelin basic protein]-arginine N-methyltransferase/ histone-arginine N-methyltransferase/ methyltransferase/ protein-arginine omega-N asymmetric methyltransferase/ protein-arginine omega-N monomethyltransferase | chr1:1373234-1375762 REVERSE
BnaA06g37060D	2.81669	26.6	misc.O-methyl transferases	INVOLVED IN: biological_process unknown; LOCATED IN: cellular_component unknown; EXPRESSED IN: 21 plant structures; EXPRESSED DURING: 13 growth stages; CONTAINS InterPro DOMAIN/s: Conserved hypothetical protein CHP00027, methylltransferase (InterPro:IPR011610), O-methyltransferase, N-terminal (InterPro:IPR003455); Has 888 Blast hits to 888 proteins in 139 species: Archae - 36; Bacteria - 741; Met…
BnaA06g38320D	2.08636	26.6	misc.O-methyl transferases	S-adenosylmethionine-dependent methyltransferase/ methyltransferase | chr1:5204625-5205912 FORWARD
BnaA03g32190D	-2.30256	26.6	misc.O-methyl transferases	Symbols: ATPRMT3, PRMT3 | PRMT3 (PROTEIN ARGININE METHYLTRANSFERASE 3); methyltransferase/ zinc ion binding | chr3:3910633-3913329 FORWARD
BnaA03g59130D	-1.94412	26.6	misc.O-methyl transferases	O-methyltransferase family 2 protein | chr4:16726948-16728531 REVERSE
BnaA06g14930D	-4.01139	26.6	misc.O-methyl transferases	O-methyltransferase, putative | chr1:7386839-7388428 REVERSE
BnaA06g29740D	-1.53516	26.6	misc.O-methyl transferases	Symbols: ATPRMT4A, PRMT4A | PRMT4A (PROTEIN ARGININE METHYLTRANSFERASE 4A); [myelin basic protein]-arginine N-methyltransferase/ histone-arginine N-methyltransferase/ methyltransferase/ protein heterodimerization/ protein homodimerization/ protein-arginine omega-N asymmetric methylt | chr5:19871251-19874920 FORWARD
BnaA07g11060D	-3.2303	26.6	misc.O-methyl transferases	O-methyltransferase, putative | chr1:7386839-7388428 REVERSE
BnaA07g11080D	-2.66999	26.6	misc.O-methyl transferases	O-methyltransferase, putative | chr1:7395228-7396773 REVERSE
BnaA07g28040D	2.60745	26.6	misc.O-methyl transferases	S-adenosyl-L-methionine-dependent methyltransferases superfamily protein; FUNCTIONS IN: methyltransferase activity; INVOLVED IN: metabolic process; LOCATED IN: chloroplast; EXPRESSED IN: 20 plant structures; EXPRESSED DURING: 13 growth stages; CONTAINS InterPro DOMAIN/s: Methyltransferase type 11 (InterPro:IPR013216); BEST Arabidopsis thaliana protein match is: S-adenosyl-L-methionine-dependent m…
BnaA07g28050D	1.94514	26.6	misc.O-methyl transferases	S-adenosyl-L-methionine-dependent methyltransferases superfamily protein; FUNCTIONS IN: methyltransferase activity; INVOLVED IN: metabolic process; LOCATED IN: chloroplast; EXPRESSED IN: 20 plant structures; EXPRESSED DURING: 13 growth stages; CONTAINS InterPro DOMAIN/s: Methyltransferase type 11 (InterPro:IPR013216); BEST Arabidopsis thaliana protein match is: S-adenosyl-L-methionine-dependent m…
BnaA08g21450D	-1.94596	26.6	misc.O-methyl transferases	O-methyltransferase, putative | chr1:7395228-7396773 REVERSE
BnaC01g06770D	-8.39518	26.6	misc.O-methyl transferases	O-methyltransferase family 2 protein | chr5:14712811-14714303 FORWARD
BnaC02g03490D	1.1534	26.6	misc.O-methyl transferases	S-adenosyl-L-methionine-dependent methyltransferases superfamily protein; FUNCTIONS IN: methyltransferase activity; INVOLVED IN: metabolic process; LOCATED IN: chloroplast; EXPRESSED IN: 20 plant structures; EXPRESSED DURING: 13 growth stages; CONTAINS InterPro DOMAIN/s: Methyltransferase type 11 (InterPro:IPR013216); BEST Arabidopsis thaliana protein match is: S-adenosyl-L-methionine-dependent m…
BnaC04g17480D	1.91164	26.6	misc.O-methyl transferases	INVOLVED IN: biological_process unknown; LOCATED IN: cellular_component unknown; EXPRESSED IN: 21 plant structures; EXPRESSED DURING: 13 growth stages; CONTAINS InterPro DOMAIN/s: Conserved hypothetical protein CHP00027, methylltransferase (InterPro:IPR011610), O-methyltransferase, N-terminal (InterPro:IPR003455); Has 888 Blast hits to 888 proteins in 139 species: Archae - 36; Bacteria - 741; Met…
BnaC05g11430D	-2.66073	26.6	misc.O-methyl transferases	S-adenosylmethionine-dependent methyltransferase/ methyltransferase | chr1:5204625-5205912 FORWARD
BnaC05g16350D	-2.18143	26.6	misc.O-methyl transferases	O-methyltransferase, putative | chr1:7399062-7400605 REVERSE
BnaC05g16360D	-1.72088	26.6	misc.O-methyl transferases	O-methyltransferase, putative | chr1:7399062-7400605 REVERSE
BnaC05g16380D	-4.66359	26.6	misc.O-methyl transferases	O-methyltransferase, putative | chr1:7399062-7400605 REVERSE
BnaC05g49560D	1.07999	26.6	misc.O-methyl transferases	Symbols: ATPRMT4B, PRMT4B | protein arginine N-methyltransferase family protein | chr3:2185143-2189387 REVERSE
BnaC07g14620D	-4.79998	26.6	misc.O-methyl transferases	O-methyltransferase, putative | chr1:7386839-7388428 REVERSE
BnaC07g14650D	-4.42291	26.6	misc.O-methyl transferases	O-methyltransferase, putative | chr1:7386839-7388428 REVERSE
BnaC07g45440D	-1.9023	26.6	misc.O-methyl transferases	O-methyltransferase family 2 protein | chr4:16726948-16728531 REVERSE
BnaC09g52040D	-2.39151	26.6	misc.O-methyl transferases	Symbols: ATPRMT3, PRMT3 | PRMT3 (PROTEIN ARGININE METHYLTRANSFERASE 3); methyltransferase/ zinc ion binding | chr3:3910633-3913329 FORWARD
BnaCnng10690D	2.80735	26.6	misc.O-methyl transferases	O-methyltransferase, putative | chr1:23417494-23419002 FORWARD
BnaA01g14600D	-3.6865	26.7	misc.oxidases - copper, flavone etc	Symbols: SKS1 | SKS1 (SKU5 SIMILAR 1); copper ion binding / oxidoreductase | chr4:12930402-12933892 FORWARD
BnaA03g13130D	-7.98489	26.7	misc.oxidases - copper, flavone etc	Symbols: SKS2 | SKS2 (SKU5 SIMILAR 2); copper ion binding / oxidoreductase | chr5:20910244-20913451 FORWARD
BnaA03g31180D	-1.57792	26.7	misc.oxidases - copper, flavone etc	Symbols: FLD | FLD (FLOWERING LOCUS D); amine oxidase/ electron carrier/ oxidoreductase | chr3:3229293-3232345 FORWARD
BnaA03g42110D	-1.28289	26.7	misc.oxidases - copper, flavone etc	Symbols: MO1 | MO1 (MONOOXYGENASE 1); electron carrier/ oxidoreductase | chr4:8972649-8974651 REVERSE
BnaA03g54620D	-2.53402	26.7	misc.oxidases - copper, flavone etc	copper amine oxidase, putative | chr1:23257726-23261966 REVERSE
BnaA04g24530D	-1.85111	26.7	misc.oxidases - copper, flavone etc	copper amine oxidase, putative | chr2:17691407-17695853 REVERSE
BnaA04g24770D	-1.10645	26.7	misc.oxidases - copper, flavone etc	Symbols: ATPAO2 | ATPAO2 (Polyamine oxidase 2); amine oxidase/ electron carrier/ oxidoreductase | chr2:17891503-17894635 FORWARD
BnaA04g24820D	-1.13858	26.7	misc.oxidases - copper, flavone etc	Symbols: AT-P4H-1 | AT-P4H-1 (A. THALIANA P4H ISOFORM 1); oxidoreductase, acting on paired donors, with incorporation or reduction of molecular oxygen, 2-oxoglutarate as one donor, and incorporation of one atom each of oxygen into both donors / procollagen-proline 4-dioxygen | chr2:17915561-17918754 FORWARD
BnaA05g13480D	-1.18861	26.7	misc.oxidases - copper, flavone etc	amine oxidase-related | chr1:20944141-20946718 FORWARD
BnaA05g30420D	-1.74987	26.7	misc.oxidases - copper, flavone etc	FAD-dependent oxidoreductase family protein | chr5:26848148-26849846 REVERSE
BnaA05g31030D	-3.01567	26.7	misc.oxidases - copper, flavone etc	Symbols: AT-P4H-2 | AT-P4H-2 (A. THALIANA P4H ISOFORM 2); oxidoreductase, acting on paired donors, with incorporation or reduction of molecular oxygen, 2-oxoglutarate as one donor, and incorporation of one atom each of oxygen into both donors / procollagen-proline 4-dioxygen | chr3:1907582-1909804 FORWARD
BnaA06g25630D	-2.48803	26.7	misc.oxidases - copper, flavone etc	oxidoreductase, 2OG-Fe(II) oxygenase family protein | chr2:7697336-7699568 FORWARD
BnaA06g40970D	-1.35214	26.7	misc.oxidases - copper, flavone etc	Symbols: sks9 | sks9 (SKU5 Similar 9); copper ion binding / oxidoreductase | chr4:17982774-17985372 FORWARD
BnaA07g02890D	-1.44322	26.7	misc.oxidases - copper, flavone etc	oxidoreductase, 2OG-Fe(II) oxygenase family protein | chr2:7697336-7699568 FORWARD
BnaA08g24080D	-3.06901	26.7	misc.oxidases - copper, flavone etc	2-oxoglutarate-dependent dioxygenase, putative | chr1:4835724-4837616 REVERSE
BnaA09g04510D	-2.45519	26.7	misc.oxidases - copper, flavone etc	Symbols: YUC6 | YUC6 (YUCCA6); FAD binding / NADP or NADPH binding / flavin-containing monooxygenase/ monooxygenase/ oxidoreductase | chr5:8935109-8938666 REVERSE
BnaA09g07690D	-2.08251	26.7	misc.oxidases - copper, flavone etc	Symbols: sks17 | sks17 (SKU5 Similar 17); copper ion binding / oxidoreductase | chr5:26722823-26725626 FORWARD
BnaA09g42750D	-3.84483	26.7	misc.oxidases - copper, flavone etc	oxidoreductase, 2OG-Fe(II) oxygenase family protein | chr2:9461125-9463192 FORWARD
BnaA09g53140D	-1.07315	26.7	misc.oxidases - copper, flavone etc	flavin-containing monooxygenase family protein / FMO family protein | chr1:23179477-23181519 FORWARD
BnaA10g21150D	-1.28868	26.7	misc.oxidases - copper, flavone etc	monooxygenase family protein | chr5:3617215-3618897 REVERSE
BnaA10g24380D	-1.46603	26.7	misc.oxidases - copper, flavone etc	FAD linked oxidase family protein | chr5:2011288-2016539 REVERSE
BnaAnng18690D	-1.26928	26.7	misc.oxidases - copper, flavone etc	oxidoreductase, 2OG-Fe(II) oxygenase family protein | chr3:10676033-10678388 REVERSE
BnaC03g36510D	-1.39068	26.7	misc.oxidases - copper, flavone etc	Symbols: FLD | FLD (FLOWERING LOCUS D); amine oxidase/ electron carrier/ oxidoreductase | chr3:3229293-3232345 FORWARD
BnaC03g47960D	-1.79569	26.7	misc.oxidases - copper, flavone etc	oxidoreductase, 2OG-Fe(II) oxygenase family protein | chr2:7697336-7699568 FORWARD
BnaC04g48360D	-1.00777	26.7	misc.oxidases - copper, flavone etc	copper amine oxidase, putative | chr2:17691407-17695853 REVERSE
BnaC04g54940D	-2.9437	26.7	misc.oxidases - copper, flavone etc	copper amine oxidase, putative | chr1:23257726-23261966 REVERSE
BnaC05g10390D	-1.91948	26.7	misc.oxidases - copper, flavone etc	2-oxoglutarate-dependent dioxygenase, putative | chr1:4833518-4835089 REVERSE
BnaC05g45530D	-1.83406	26.7	misc.oxidases - copper, flavone etc	Symbols: AT-P4H-2 | AT-P4H-2 (A. THALIANA P4H ISOFORM 2); oxidoreductase, acting on paired donors, with incorporation or reduction of molecular oxygen, 2-oxoglutarate as one donor, and incorporation of one atom each of oxygen into both donors / procollagen-proline 4-dioxygen | chr3:1907582-1909804 FORWARD
BnaC05g48350D	-1.34699	26.7	misc.oxidases - copper, flavone etc	FAD binding / monooxygenase/ oxidoreductase/ oxidoreductase, acting on paired donors, with incorporation or reduction of molecular oxygen, NADH or NADPH as one donor, and incorporation of one atom of oxygen | chr3:8747831-8751369 REVERSE
BnaC06g11190D	-1.15849	26.7	misc.oxidases - copper, flavone etc	amine oxidase-related | chr1:20944141-20946718 FORWARD
BnaC07g06600D	-1.23236	26.7	misc.oxidases - copper, flavone etc	oxidoreductase, 2OG-Fe(II) oxygenase family protein | chr2:7697336-7699568 FORWARD
BnaC07g07550D	-1.09182	26.7	misc.oxidases - copper, flavone etc	FAD binding / monooxygenase/ oxidoreductase/ oxidoreductase, acting on paired donors, with incorporation or reduction of molecular oxygen, NADH or NADPH as one donor, and incorporation of one atom of oxygen | chr3:8747831-8751369 REVERSE
BnaC07g33180D	-1.60904	26.7	misc.oxidases - copper, flavone etc	Symbols: MO1 | MO1 (MONOOXYGENASE 1); electron carrier/ oxidoreductase | chr4:8972649-8974651 REVERSE
BnaC08g13170D	-8.88671	26.7	misc.oxidases - copper, flavone etc	flavin-containing monooxygenase family protein / FMO family protein | chr4:14192583-14194256 FORWARD
BnaC08g16020D	-4.09824	26.7	misc.oxidases - copper, flavone etc	2-oxoglutarate-dependent dioxygenase, putative | chr1:4835724-4837616 REVERSE
BnaC08g35230D	-2.46059	26.7	misc.oxidases - copper, flavone etc	oxidoreductase, 2OG-Fe(II) oxygenase family protein | chr2:9461125-9463192 FORWARD
BnaC08g41540D	-1.99051	26.7	misc.oxidases - copper, flavone etc	Symbols: FMO GS-OX5 | FMO GS-OX5 (FLAVIN-MONOOXYGENASE GLUCOSINOLATE S-OXYGENASE 5); 8-methylthiopropyl glucosinolate S-oxygenase/ flavin-containing monooxygenase/ monooxygenase | chr1:4121369-4124595 FORWARD
BnaC09g10780D	-2.0973	26.7	misc.oxidases - copper, flavone etc	flavin-containing monooxygenase family protein / FMO family protein | chr1:23182644-23184991 FORWARD
BnaC09g13010D	-1.11464	26.7	misc.oxidases - copper, flavone etc	Symbols: LDL1, SWP1, ATSWP1 | LDL1 (LSD1-LIKE1); amine oxidase/ electron carrier/ oxidoreductase | chr1:23264490-23267202 REVERSE
BnaC09g13330D	-1.92608	26.7	misc.oxidases - copper, flavone etc	flavin-containing monooxygenase family protein / FMO family protein | chr1:23179477-23181519 FORWARD
BnaC09g45280D	-2.77538	26.7	misc.oxidases - copper, flavone etc	monooxygenase family protein | chr5:3617215-3618897 REVERSE
BnaCnng30110D	-2.54672	26.7	misc.oxidases - copper, flavone etc	Symbols: AT-P4H-1 | AT-P4H-1 (A. THALIANA P4H ISOFORM 1); oxidoreductase, acting on paired donors, with incorporation or reduction of molecular oxygen, 2-oxoglutarate as one donor, and incorporation of one atom each of oxygen into both donors / procollagen-proline 4-dioxygen | chr2:17915561-17918754 FORWARD
BnaA08g04920D	1.26545	26.7	misc.oxidases - copper, flavone etc	oxidoreductase, zinc-binding dehydrogenase family protein | chr4:7600551-7602729 FORWARD
BnaC06g17070D	1.4197	26.7	misc.oxidases - copper, flavone etc	Symbols: ATPAO3 | ATPAO3 (Polyamine oxidase 3); polyamine oxidase | chr3:21824696-21827509 REVERSE
BnaC08g05290D	2.19874	26.7	misc.oxidases - copper, flavone etc	oxidoreductase, zinc-binding dehydrogenase family protein | chr4:7600551-7602729 FORWARD
BnaC09g40930D	2.8362	26.7	misc.oxidases - copper, flavone etc	NADP-dependent oxidoreductase, putative | chr5:5581658-5584029 REVERSE
BnaC09g47910D	2.34744	26.7	misc.oxidases - copper, flavone etc	oxidoreductase, 2OG-Fe(II) oxygenase family protein | chr5:2367167-2369554 FORWARD
BnaC02g45540D	2.67005	26.7	misc.oxidases - copper, flavone etc	Symbols: ATPAO4, PAO4 | ATPAO4 (ARABIDOPSIS THALIANA POLYAMINE OXIDASE 4); amine oxidase/ polyamine oxidase | chr1:24489780-24493024 FORWARD
BnaA02g12280D	2.93408	26.7	misc.oxidases - copper, flavone etc	Symbols: ATPAO4, PAO4 | ATPAO4 (ARABIDOPSIS THALIANA POLYAMINE OXIDASE 4); amine oxidase/ polyamine oxidase | chr1:24489780-24493024 FORWARD
BnaA09g13190D	3.45421	26.7	misc.oxidases - copper, flavone etc	Symbols: FMO GS-OX1 | FMO GS-OX1 (FLAVIN-MONOOXYGENASE GLUCOSINOLATE S-OXYGENASE 1); 3-methylthiopropyl glucosinolate S-oxygenase/ 4-methylthiopropyl glucosinolate S-oxygenase/ 5-methylthiopropyl glucosinolate S-oxygenase/ 6-methylthiopropyl glucosinolate S-oxygenase/ 7-methyl | chr1:24499066-24502745 REVERSE
BnaCnng20650D	1.73309	26.7	misc.oxidases - copper, flavone etc	oxidoreductase, 2OG-Fe(II) oxygenase family protein | chr1:7020749-7023067 REVERSE
BnaC07g50830D	1.87299	26.7	misc.oxidases - copper, flavone etc	Symbols: ATPAO5 | ATPAO5 (Polyamine oxidase 5); amine oxidase/ electron carrier/ oxidoreductase | chr4:14553315-14555167 REVERSE
BnaA01g01510D	-3.40696	26.7	misc.oxidases - copper, flavone etc	oxidoreductase, 2OG-Fe(II) oxygenase family protein | chr4:17078311-17080749 REVERSE
BnaA01g11870D	-1.23004	26.7	misc.oxidases - copper, flavone etc	Symbols: sks4 | sks4 (SKU5 Similar 4); copper ion binding / oxidoreductase | chr4:11663324-11666715 FORWARD
BnaA06g31460D	-1.18497	26.7	misc.oxidases - copper, flavone etc	oxidoreductase, 2OG-Fe(II) oxygenase family protein | chr3:10676033-10678388 REVERSE
BnaA07g18130D	1.53961	26.7	misc.oxidases - copper, flavone etc	Symbols: ATPAO3 | ATPAO3 (Polyamine oxidase 3); polyamine oxidase | chr3:21824696-21827509 REVERSE
BnaA09g12680D	-1.25244	26.7	misc.oxidases - copper, flavone etc	Symbols: LDL1, SWP1, ATSWP1 | LDL1 (LSD1-LIKE1); amine oxidase/ electron carrier/ oxidoreductase | chr1:23264490-23267202 REVERSE
BnaA09g50630D	7.54432	26.7	misc.oxidases - copper, flavone etc	flavin-containing monooxygenase family protein / FMO family protein | chr1:1104623-1105988 FORWARD
BnaA10g17570D	1.31755	26.7	misc.oxidases - copper, flavone etc	NADP-dependent oxidoreductase, putative | chr5:5584801-5587063 REVERSE
BnaAnng41850D	-3.92057	26.7	misc.oxidases - copper, flavone etc	flavin-containing monooxygenase family protein / FMO family protein | chr4:14192583-14194256 FORWARD
BnaC01g02560D	1.43882	26.7	misc.oxidases - copper, flavone etc	oxidoreductase, 2OG-Fe(II) oxygenase family protein | chr4:17078311-17080749 REVERSE
BnaC01g13470D	-3.22837	26.7	misc.oxidases - copper, flavone etc	Symbols: sks4 | sks4 (SKU5 Similar 4); copper ion binding / oxidoreductase | chr4:11663324-11666715 FORWARD
BnaC01g17180D	-2.28758	26.7	misc.oxidases - copper, flavone etc	Symbols: SKS1 | SKS1 (SKU5 SIMILAR 1); copper ion binding / oxidoreductase | chr4:12930402-12933892 FORWARD
BnaC03g69740D	-1.12594	26.7	misc.oxidases - copper, flavone etc	copper amine oxidase, putative | chr1:23257726-23261966 REVERSE
BnaC08g15390D	-3.12776	26.7	misc.oxidases - copper, flavone etc	Symbols: FMO GS-OX5 | FMO GS-OX5 (FLAVIN-MONOOXYGENASE GLUCOSINOLATE S-OXYGENASE 5); 8-methylthiopropyl glucosinolate S-oxygenase/ flavin-containing monooxygenase/ monooxygenase | chr1:4121369-4124595 FORWARD
BnaC09g01700D	-2.47154	26.7	misc.oxidases - copper, flavone etc	oxidoreductase, 2OG-Fe(II) oxygenase family protein | chr3:10676033-10678388 REVERSE
BnaC09g13360D	1.6857	26.7	misc.oxidases - copper, flavone etc	Symbols: FMO GS-OX2 | FMO GS-OX2 (FLAVIN-MONOOXYGENASE GLUCOSINOLATE S-OXYGENASE 2); 3-methylthiopropyl glucosinolate S-oxygenase/ 4-methylthiopropyl glucosinolate S-oxygenase/ 5-methylthiopropyl glucosinolate S-oxygenase/ 7-methylthiopropyl glucosinolate S-oxygenase/ 8-methyl | chr1:23151794-23155717 FORWARD
BnaCnng06210D	-1.05374	26.7	misc.oxidases - copper, flavone etc	NADP-dependent oxidoreductase, putative | chr3:698530-700301 REVERSE
BnaA02g01810D	-4.2697	26.8	misc.nitrilases, *nitrile lyases, berberine bridge enzymes, reticuline oxidases, troponine reductases	alpha-N-acetylglucosaminidase family / NAGLU family | chr5:4415754-4420371 FORWARD
BnaA02g16200D	-3.1565	26.8	misc.nitrilases, *nitrile lyases, berberine bridge enzymes, reticuline oxidases, troponine reductases	Symbols: HTH, EDA17 | HTH (HOTHEAD); FAD binding / aldehyde-lyase/ mandelonitrile lyase | chr1:27452766-27455964 FORWARD
BnaA03g21990D	-1.84821	26.8	misc.nitrilases, *nitrile lyases, berberine bridge enzymes, reticuline oxidases, troponine reductases	tropinone reductase, putative / tropine dehydrogenase, putative | chr2:12592148-12593686 FORWARD
BnaA04g13730D	-1.78533	26.8	misc.nitrilases, *nitrile lyases, berberine bridge enzymes, reticuline oxidases, troponine reductases	Symbols: ATMES4, MES4, ABE4 | MES4 (METHYL ESTERASE 4); hydrolase/ hydrolase, acting on ester bonds / methyl salicylate esterase | chr2:10033043-10034327 REVERSE
BnaA05g12690D	-1.42435	26.8	misc.nitrilases, *nitrile lyases, berberine bridge enzymes, reticuline oxidases, troponine reductases	tropinone reductase, putative / tropine dehydrogenase, putative | chr2:12590059-12591363 FORWARD
BnaA07g22900D	-2.77366	26.8	misc.nitrilases, *nitrile lyases, berberine bridge enzymes, reticuline oxidases, troponine reductases	Symbols: HTH, EDA17 | HTH (HOTHEAD); FAD binding / aldehyde-lyase/ mandelonitrile lyase | chr1:27452766-27455964 FORWARD
BnaA08g30360D	-2.82882	26.8	misc.nitrilases, *nitrile lyases, berberine bridge enzymes, reticuline oxidases, troponine reductases	Symbols: ATMES16, MES16 | MES16 (METHYL ESTERASE 16); catalytic/ hydrolase, acting on ester bonds / methyl indole-3-acetate esterase/ methyl jasmonate esterase | chr4:9392147-9393529 REVERSE
BnaA09g17120D	-2.23704	26.8	misc.nitrilases, *nitrile lyases, berberine bridge enzymes, reticuline oxidases, troponine reductases	FAD-binding domain-containing protein | chr5:17882196-17885004 REVERSE
BnaA09g17130D	-2.19467	26.8	misc.nitrilases, *nitrile lyases, berberine bridge enzymes, reticuline oxidases, troponine reductases	FAD-binding domain-containing protein | chr5:17891222-17892978 REVERSE
BnaA09g35530D	-2.98663	26.8	misc.nitrilases, *nitrile lyases, berberine bridge enzymes, reticuline oxidases, troponine reductases	glucose-methanol-choline (GMC) oxidoreductase family protein | chr3:20803133-20806013 REVERSE
BnaA09g45720D	-3.36257	26.8	misc.nitrilases, *nitrile lyases, berberine bridge enzymes, reticuline oxidases, troponine reductases	glucose-methanol-choline (GMC) oxidoreductase family protein | chr1:4852802-4854307 FORWARD
BnaA09g48610D	-1.28304	26.8	misc.nitrilases, *nitrile lyases, berberine bridge enzymes, reticuline oxidases, troponine reductases	Symbols: ATAMI1, AMI1, ATTOC64-I | AMI1 (AMIDASE 1); amidase/ hydrolase, acting on carbon-nitrogen (but not peptide) bonds / indoleacetamide hydrolase | chr1:2884411-2886620 FORWARD
BnaA10g21960D	-3.96222	26.8	misc.nitrilases, *nitrile lyases, berberine bridge enzymes, reticuline oxidases, troponine reductases	Symbols: ATMES5, MES5 | MES5 (METHYL ESTERASE 5); hydrolase | chr5:3239617-3240870 FORWARD
BnaAnng35680D	-3.54344	26.8	misc.nitrilases, *nitrile lyases, berberine bridge enzymes, reticuline oxidases, troponine reductases	glucose-methanol-choline (GMC) oxidoreductase family protein | chr3:20803133-20806013 REVERSE
BnaC01g12260D	-3.56429	26.8	misc.nitrilases, *nitrile lyases, berberine bridge enzymes, reticuline oxidases, troponine reductases	FAD-binding domain-containing protein | chr4:11150160-11151758 FORWARD
BnaC02g04940D	-3.3806	26.8	misc.nitrilases, *nitrile lyases, berberine bridge enzymes, reticuline oxidases, troponine reductases	alpha-N-acetylglucosaminidase family / NAGLU family | chr5:4415754-4420371 FORWARD
BnaC02g46880D	-2.61196	26.8	misc.nitrilases, *nitrile lyases, berberine bridge enzymes, reticuline oxidases, troponine reductases	amidase family protein | chr4:16615549-16617424 FORWARD
BnaC03g26310D	-2.66936	26.8	misc.nitrilases, *nitrile lyases, berberine bridge enzymes, reticuline oxidases, troponine reductases	tropinone reductase, putative / tropine dehydrogenase, putative | chr2:12606059-12607618 FORWARD
BnaC03g68610D	-4.7845	26.8	misc.nitrilases, *nitrile lyases, berberine bridge enzymes, reticuline oxidases, troponine reductases	Symbols: ATAMI1, AMI1, ATTOC64-I | AMI1 (AMIDASE 1); amidase/ hydrolase, acting on carbon-nitrogen (but not peptide) bonds / indoleacetamide hydrolase | chr1:2884411-2886620 FORWARD
BnaC04g14140D	-4.66297	26.8	misc.nitrilases, *nitrile lyases, berberine bridge enzymes, reticuline oxidases, troponine reductases	tropinone reductase, putative / tropine dehydrogenase, putative | chr2:12590059-12591363 FORWARD
BnaC04g14160D	-4.3439	26.8	misc.nitrilases, *nitrile lyases, berberine bridge enzymes, reticuline oxidases, troponine reductases	tropinone reductase, putative / tropine dehydrogenase, putative | chr2:12592148-12593686 FORWARD
BnaC04g40340D	-1.36596	26.8	misc.nitrilases, *nitrile lyases, berberine bridge enzymes, reticuline oxidases, troponine reductases	tropinone reductase, putative / tropine dehydrogenase, putative | chr2:12592148-12593686 FORWARD
BnaC06g23880D	-2.82551	26.8	misc.nitrilases, *nitrile lyases, berberine bridge enzymes, reticuline oxidases, troponine reductases	Symbols: HTH, EDA17 | HTH (HOTHEAD); FAD binding / aldehyde-lyase/ mandelonitrile lyase | chr1:27452766-27455964 FORWARD
BnaC07g17940D	-2.63158	26.8	misc.nitrilases, *nitrile lyases, berberine bridge enzymes, reticuline oxidases, troponine reductases	FAD-binding domain-containing protein | chr5:17882196-17885004 REVERSE
BnaC07g46400D	-1.91334	26.8	misc.nitrilases, *nitrile lyases, berberine bridge enzymes, reticuline oxidases, troponine reductases	Symbols: ATMES9, MES9 | MES9 (METHYL ESTERASE 9); hydrolase, acting on ester bonds / methyl indole-3-acetate esterase/ methyl jasmonate esterase/ methyl salicylate esterase | chr4:17492878-17494109 REVERSE
BnaC07g50080D	-3.41633	26.8	misc.nitrilases, *nitrile lyases, berberine bridge enzymes, reticuline oxidases, troponine reductases	Symbols: ATMES16, MES16 | MES16 (METHYL ESTERASE 16); catalytic/ hydrolase, acting on ester bonds / methyl indole-3-acetate esterase/ methyl jasmonate esterase | chr4:9392147-9393529 REVERSE
BnaC08g26980D	-1.80735	26.8	misc.nitrilases, *nitrile lyases, berberine bridge enzymes, reticuline oxidases, troponine reductases	glucose-methanol-choline (GMC) oxidoreductase family protein | chr3:20803133-20806013 REVERSE
BnaC08g39840D	-2.63227	26.8	misc.nitrilases, *nitrile lyases, berberine bridge enzymes, reticuline oxidases, troponine reductases	glucose-methanol-choline (GMC) oxidoreductase family protein | chr1:4852802-4854307 FORWARD
BnaC08g42870D	-1.63319	26.8	misc.nitrilases, *nitrile lyases, berberine bridge enzymes, reticuline oxidases, troponine reductases	Symbols: ATAMI1, AMI1, ATTOC64-I | AMI1 (AMIDASE 1); amidase/ hydrolase, acting on carbon-nitrogen (but not peptide) bonds / indoleacetamide hydrolase | chr1:2884411-2886620 FORWARD
BnaC08g47900D	-3.68297	26.8	misc.nitrilases, *nitrile lyases, berberine bridge enzymes, reticuline oxidases, troponine reductases	Symbols: ATMES16, MES16 | MES16 (METHYL ESTERASE 16); catalytic/ hydrolase, acting on ester bonds / methyl indole-3-acetate esterase/ methyl jasmonate esterase | chr4:9392147-9393529 REVERSE
BnaC09g18420D	-2.9498	26.8	misc.nitrilases, *nitrile lyases, berberine bridge enzymes, reticuline oxidases, troponine reductases	FAD-binding domain-containing protein | chr5:17891222-17892978 REVERSE
BnaC09g18440D	-3.15754	26.8	misc.nitrilases, *nitrile lyases, berberine bridge enzymes, reticuline oxidases, troponine reductases	FAD-binding domain-containing protein | chr5:17882196-17885004 REVERSE
BnaC09g25430D	-2.17587	26.8	misc.nitrilases, *nitrile lyases, berberine bridge enzymes, reticuline oxidases, troponine reductases	nitrilase, putative | chr4:5608240-5611215 REVERSE
BnaC09g48560D	-2.05148	26.8	misc.nitrilases, *nitrile lyases, berberine bridge enzymes, reticuline oxidases, troponine reductases	amidase family protein | chr5:2326704-2330142 REVERSE
BnaC09g49360D	-1.4487	26.8	misc.nitrilases, *nitrile lyases, berberine bridge enzymes, reticuline oxidases, troponine reductases	tropinone reductase, putative / tropine dehydrogenase, putative | chr5:1823842-1825894 REVERSE
BnaCnng22120D	-3.73456	26.8	misc.nitrilases, *nitrile lyases, berberine bridge enzymes, reticuline oxidases, troponine reductases	Symbols: ATMES14, MES14 | MES14 (METHYL ESTERASE 14); hydrolase | chr1:12355568-12358031 FORWARD
BnaCnng55990D	-1.16881	26.8	misc.nitrilases, *nitrile lyases, berberine bridge enzymes, reticuline oxidases, troponine reductases	glucose-methanol-choline (GMC) oxidoreductase family protein | chr3:20803133-20806013 REVERSE
BnaCnng56000D	-2.44651	26.8	misc.nitrilases, *nitrile lyases, berberine bridge enzymes, reticuline oxidases, troponine reductases	glucose-methanol-choline (GMC) oxidoreductase family protein | chr3:20803133-20806013 REVERSE
BnaCnng74390D	-2.51749	26.8	misc.nitrilases, *nitrile lyases, berberine bridge enzymes, reticuline oxidases, troponine reductases	Symbols: ATMES5, MES5 | MES5 (METHYL ESTERASE 5); hydrolase | chr5:3239617-3240870 FORWARD
BnaC08g02180D	1.52349	26.8	misc.nitrilases, *nitrile lyases, berberine bridge enzymes, reticuline oxidases, troponine reductases	tropinone reductase, putative / tropine dehydrogenase, putative | chr1:2287926-2289336 REVERSE
BnaAnng26060D	2.10572	26.8	misc.nitrilases, *nitrile lyases, berberine bridge enzymes, reticuline oxidases, troponine reductases	tropinone reductase, putative / tropine dehydrogenase, putative | chr1:2287926-2289336 REVERSE
BnaA01g10740D	-2.23879	26.8	misc.nitrilases, *nitrile lyases, berberine bridge enzymes, reticuline oxidases, troponine reductases	FAD-binding domain-containing protein | chr4:11150160-11151758 FORWARD
BnaA01g10770D	-7.82443	26.8	misc.nitrilases, *nitrile lyases, berberine bridge enzymes, reticuline oxidases, troponine reductases	FAD-binding domain-containing protein | chr4:11172622-11174467 FORWARD
BnaA01g11010D	-5.13955	26.8	misc.nitrilases, *nitrile lyases, berberine bridge enzymes, reticuline oxidases, troponine reductases	FAD-binding domain-containing protein | chr4:11172622-11174467 FORWARD
[truncated: 15,730 more rows]
