# Supplementary material for: Characterization of cold stress responses in different rapeseed ecotypes based on metabolomics and transcriptomics analyses
Source: PeerJ. 2020 Mar 31;8:e8704. doi: 10.7717/peerj.8704 (PMC7120054; doi:10.7717/peerj.8704)
Supplement: Supplemental Information 12 [file peerj-08-8704-s012.xlsx]

## Sheet: S10
Table S10 MapMan Bins of DEGs enriched in different metabolic processes in winter B. napus ecotype after cold stress.
Gene ID	Log2 fold change -Winter	BINCODE	NAME	DESCRIPTION
BnaC01g41710D	-1.09771	1.2	PS.photorespiration	formyltetrahydrofolate deformylase/ hydroxymethyl-, formyl- and related transferase/ methyltransferase | chr4:9703547-9705468 REVERSE
BnaCnng40800D	-3.62059	1.2	PS.photorespiration	formyltetrahydrofolate deformylase, putative | chr5:19241703-19243988 FORWARD
BnaA03g21770D	-1.37334	1.3	PS.calvin cycle	Symbols: CP12-1, CP12 | CP12-1 | chr2:19446854-19447438 FORWARD
BnaA05g00550D	-1.22458	1.3	PS.calvin cycle	Symbols: CP12-1, CP12 | CP12-1 | chr2:19446854-19447438 FORWARD
BnaA07g19320D	-3.66427	1.3	PS.calvin cycle	Symbols: CP12-2, CP12 | CP12-2; protein binding | chr3:23090944-23091566 FORWARD
BnaA09g39860D	-2.28622	1.3	PS.calvin cycle	Symbols: CP12-2, CP12 | CP12-2; protein binding | chr3:23090944-23091566 FORWARD
BnaC04g51320D	-1.1169	1.3	PS.calvin cycle	Symbols: CP12-1, CP12 | CP12-1 | chr2:19446854-19447438 FORWARD
BnaC06g18520D	-4.71371	1.3	PS.calvin cycle	Symbols: CP12-2, CP12 | CP12-2; protein binding | chr3:23090944-23091566 FORWARD
BnaC08g32210D	-3.00604	1.3	PS.calvin cycle	Symbols: CP12-2, CP12 | CP12-2; protein binding | chr3:23090944-23091566 FORWARD
BnaA03g50080D	-1.55092	3.3	minor CHO metabolism.sugar alcohols	ribitol kinase, putative | chr4:14831861-14835214 FORWARD
BnaA10g07650D	-1.13606	3.3	minor CHO metabolism.sugar alcohols	sorbitol dehydrogenase, putative / L-iditol 2-dehydrogenase, putative | chr5:21111445-21113403 FORWARD
BnaC07g42540D	-1.14553	3.3	minor CHO metabolism.sugar alcohols	ribitol kinase, putative | chr4:14831861-14835214 FORWARD
BnaA01g16600D	-2.37895	3.5	minor CHO metabolism.others	pfkB-type carbohydrate kinase family protein | chr4:13782515-13785112 REVERSE
BnaA01g27130D	-1.54582	3.5	minor CHO metabolism.others	aldose 1-epimerase family protein | chr3:6143519-6145337 REVERSE
BnaA03g04930D	-1.4357	3.5	minor CHO metabolism.others	aldose 1-epimerase family protein | chr5:4674233-4676765 REVERSE
BnaA03g10320D	-1.41121	3.5	minor CHO metabolism.others	aldose 1-epimerase family protein | chr5:23218214-23221089 FORWARD
BnaA03g12740D	-2.71536	3.5	minor CHO metabolism.others	sugar isomerase (SIS) domain-containing protein | chr5:21201730-21202543 REVERSE
BnaA05g06800D	-1.64774	3.5	minor CHO metabolism.others	aldo/keto reductase family protein | chr2:15838764-15840932 FORWARD
BnaA05g16180D	-1.77077	3.5	minor CHO metabolism.others	pfkB-type carbohydrate kinase family protein | chr1:18264971-18267270 FORWARD
BnaA05g22280D	-1.77686	3.5	minor CHO metabolism.others	aldose 1-epimerase family protein | chr3:6143519-6145337 REVERSE
BnaA05g22480D	-1.06982	3.5	minor CHO metabolism.others	dihydroxyacetone kinase family protein | chr3:6081671-6086138 REVERSE
BnaA06g00510D	-2.56274	3.5	minor CHO metabolism.others	Symbols: ATFRUCT5, AtcwINV3 | ATFRUCT5 (BETA-FRUCTOFURANOSIDASE 5); hydrolase, hydrolyzing O-glycosyl compounds / levanase | chr1:20566598-20569286 FORWARD
BnaA06g17140D	-2.02243	3.5	minor CHO metabolism.others	aldose 1-epimerase family protein | chr3:17634810-17637204 FORWARD
BnaA08g03250D	-2.22948	3.5	minor CHO metabolism.others	dihydroxyacetone kinase family protein | chr1:17902636-17906806 REVERSE
BnaA09g43270D	-1.18518	3.5	minor CHO metabolism.others	mannose 6-phosphate reductase (NADPH-dependent), putative | chr2:9103207-9105187 REVERSE
BnaA10g06870D	-1.46458	3.5	minor CHO metabolism.others	aldo/keto reductase family protein | chr5:21765054-21767000 REVERSE
BnaA10g11380D	-1.50405	3.5	minor CHO metabolism.others	aldose 1-epimerase family protein | chr5:23218214-23221089 FORWARD
BnaA10g26340D	-1.93348	3.5	minor CHO metabolism.others	3-deoxy-D-manno-octulosonic acid transferase-related | chr5:995160-997848 FORWARD
BnaAnng08710D	-1.75585	3.5	minor CHO metabolism.others	carbohydrate kinase family | chr5:6426071-6428467 REVERSE
BnaAnng29390D	-1.67475	3.5	minor CHO metabolism.others	haloacid dehalogenase-like hydrolase family protein | chr5:21860997-21864926 REVERSE
BnaC01g34580D	-1.67095	3.5	minor CHO metabolism.others	aldose 1-epimerase family protein | chr3:6143519-6145337 REVERSE
BnaC02g08550D	-1.89162	3.5	minor CHO metabolism.others	carbohydrate kinase family | chr5:6426071-6428467 REVERSE
BnaC02g11600D	-1.67935	3.5	minor CHO metabolism.others	aldose 1-epimerase family protein | chr5:23218214-23221089 FORWARD
BnaC02g14030D	-1.6268	3.5	minor CHO metabolism.others	haloacid dehalogenase-like hydrolase family protein | chr5:21860997-21864926 REVERSE
BnaC03g57220D	-1.52869	3.5	minor CHO metabolism.others	aldose 1-epimerase family protein | chr3:17634810-17637204 FORWARD
BnaC04g30550D	-1.17398	3.5	minor CHO metabolism.others	Symbols: SOS4, ATSOS4 | SOS4 (SALT OVERLY SENSITIVE 4); kinase/ pyridoxal kinase | chr5:15065374-15068999 FORWARD
BnaC04g53480D	-1.62674	3.5	minor CHO metabolism.others	aldo/keto reductase family protein | chr2:15838764-15840932 FORWARD
BnaC05g13340D	-1.52663	3.5	minor CHO metabolism.others	pfkB-type carbohydrate kinase family protein | chr1:5867635-5869356 FORWARD
BnaC05g26130D	-1.05977	3.5	minor CHO metabolism.others	pfkB-type carbohydrate kinase family protein | chr1:18264971-18267270 FORWARD
BnaC05g35520D	-1.89133	3.5	minor CHO metabolism.others	aldose 1-epimerase family protein | chr3:6143519-6145337 REVERSE
BnaC06g07120D	-1.71909	3.5	minor CHO metabolism.others	Symbols: ATFRUCT5, AtcwINV3 | ATFRUCT5 (BETA-FRUCTOFURANOSIDASE 5); hydrolase, hydrolyzing O-glycosyl compounds / levanase | chr1:20566598-20569286 FORWARD
BnaC07g17460D	-3.40009	3.5	minor CHO metabolism.others	pfkB-type carbohydrate kinase family protein | chr5:17667310-17670239 REVERSE
BnaC07g50370D	-1.41066	3.5	minor CHO metabolism.others	pfkB-type carbohydrate kinase family protein | chr4:13782515-13785112 REVERSE
BnaC08g03580D	-1.87643	3.5	minor CHO metabolism.others	dihydroxyacetone kinase family protein | chr1:17902636-17906806 REVERSE
BnaC09g32880D	-1.59281	3.5	minor CHO metabolism.others	aldose 1-epimerase family protein | chr5:23218214-23221089 FORWARD
BnaC06g42870D	1.27528	3.5	minor CHO metabolism.others	aldose 1-epimerase family protein | chr3:22799027-22801205 FORWARD
BnaCnng68220D	1.45402	3.5	minor CHO metabolism.others	pfkB-type carbohydrate kinase family protein | chr1:5867635-5869356 FORWARD
BnaC03g72040D	1.4959	3.5	minor CHO metabolism.others	aldo/keto reductase family protein | chr2:15834867-15836881 FORWARD
BnaC04g53580D	2.47593	3.5	minor CHO metabolism.others	aldo/keto reductase family protein | chr2:15831854-15833920 FORWARD
BnaA01g13390D	-1.56584	3.5	minor CHO metabolism.others	aldose 1-epimerase family protein | chr4:12362484-12365098 FORWARD
BnaA01g15080D	1.49667	3.5	minor CHO metabolism.others	aldose 1-epimerase family protein | chr4:13161346-13163636 FORWARD
BnaA02g33390D	-3.82443	3.5	minor CHO metabolism.others	aldo/keto reductase family protein | chr5:25064835-25066111 FORWARD
BnaA03g03730D	-1.70044	3.5	minor CHO metabolism.others	conserved oligomeric Golgi complex component-related / COG complex component-related | chr5:3868652-3872269 REVERSE
BnaA06g36460D	-2.41954	3.5	minor CHO metabolism.others	pfkB-type carbohydrate kinase family protein | chr5:17667310-17670239 REVERSE
BnaC01g15540D	-1.23163	3.5	minor CHO metabolism.others	aldose 1-epimerase family protein | chr4:12362484-12365098 FORWARD
BnaC01g17810D	1.98667	3.5	minor CHO metabolism.others	aldose 1-epimerase family protein | chr4:13161346-13163636 FORWARD
BnaC03g06530D	-1.20058	3.5	minor CHO metabolism.others	aldose 1-epimerase family protein | chr5:4674233-4676765 REVERSE
BnaC03g72060D	-3.52607	3.5	minor CHO metabolism.others	aldo/keto reductase family protein | chr2:15834867-15836881 FORWARD
BnaC05g15200D	-1.44679	3.5	minor CHO metabolism.others	pfkB-type carbohydrate kinase family protein | chr1:6778988-6781173 FORWARD
BnaC05g35740D	-1.37833	3.5	minor CHO metabolism.others	dihydroxyacetone kinase family protein | chr3:6081671-6086138 REVERSE
BnaC08g14350D	-9.12928	3.5	minor CHO metabolism.others	aldose 1-epimerase family protein | chr3:22799027-22801205 FORWARD
BnaA03g39980D	-2.53462	3.6	minor CHO metabolism.callose	Symbols: PDCB1 | PDCB1 (PLASMODESMATA CALLOSE-BINDING PROTEIN 1); callose binding / polysaccharide binding | chr5:24587213-24589580 REVERSE
BnaA05g11020D	-1.78076	3.6	minor CHO metabolism.callose	Symbols: ATGSL03, GSL03, ATGSL3 | ATGSL03 (GLUCAN SYNTHASE-LIKE 3); 1,3-beta-glucan synthase/ transferase, transferring glycosyl groups | chr2:13589545-13600066 FORWARD
BnaA09g05600D	-4.94432	3.6	minor CHO metabolism.callose	Symbols: PDCB1 | PDCB1 (PLASMODESMATA CALLOSE-BINDING PROTEIN 1); callose binding / polysaccharide binding | chr5:24587213-24589580 REVERSE
BnaA09g20050D	-7.59246	3.6	minor CHO metabolism.callose	Symbols: ATGSL1, ATGSL01, GSL01, GSL1 | GSL1 (GLUCAN SYNTHASE-LIKE 1); 1,3-beta-glucan synthase/ transferase, transferring glycosyl groups | chr4:2537039-2543131 FORWARD
BnaA09g20060D	-5.52356	3.6	minor CHO metabolism.callose	Symbols: ATGSL1, ATGSL01, GSL01, GSL1 | GSL1 (GLUCAN SYNTHASE-LIKE 1); 1,3-beta-glucan synthase/ transferase, transferring glycosyl groups | chr4:2537039-2543131 FORWARD
BnaA10g20270D	-1.5333	3.6	minor CHO metabolism.callose	Symbols: ATGSL12, gsl12 | ATGSL12 (glucan synthase-like 12); 1,3-beta-glucan synthase/ transferase, transferring glycosyl groups | chr5:4110295-4121427 REVERSE
BnaC02g04450D	-1.63559	3.6	minor CHO metabolism.callose	Symbols: ATGSL12, gsl12 | ATGSL12 (glucan synthase-like 12); 1,3-beta-glucan synthase/ transferase, transferring glycosyl groups | chr5:4110295-4121427 REVERSE
BnaC02g42010D	-1.71674	3.6	minor CHO metabolism.callose	Symbols: PDCB1 | PDCB1 (PLASMODESMATA CALLOSE-BINDING PROTEIN 1); callose binding / polysaccharide binding | chr5:24587213-24589580 REVERSE
BnaC04g12720D	-1.347	3.6	minor CHO metabolism.callose	Symbols: ATGSL03, GSL03, ATGSL3 | ATGSL03 (GLUCAN SYNTHASE-LIKE 3); 1,3-beta-glucan synthase/ transferase, transferring glycosyl groups | chr2:13589545-13600066 FORWARD
BnaC05g03680D	-1.52462	3.6	minor CHO metabolism.callose	Symbols: CALS1, GSL06, ATGSL6, ATGSL06, GSL6 | CALS1 (CALLOSE SYNTHASE 1); 1,3-beta-glucan synthase/ transferase, transferring glycosyl groups | chr1:1647706-1658686 REVERSE
BnaC09g05160D	-2.5486	3.6	minor CHO metabolism.callose	Symbols: PDCB1 | PDCB1 (PLASMODESMATA CALLOSE-BINDING PROTEIN 1); callose binding / polysaccharide binding | chr5:24587213-24589580 REVERSE
BnaC09g22380D	-3.65916	3.6	minor CHO metabolism.callose	Symbols: ATGSL1, ATGSL01, GSL01, GSL1 | GSL1 (GLUCAN SYNTHASE-LIKE 1); 1,3-beta-glucan synthase/ transferase, transferring glycosyl groups | chr4:2537039-2543131 FORWARD
BnaC09g22390D	-3.90293	3.6	minor CHO metabolism.callose	Symbols: ATGSL1, ATGSL01, GSL01, GSL1 | GSL1 (GLUCAN SYNTHASE-LIKE 1); 1,3-beta-glucan synthase/ transferase, transferring glycosyl groups | chr4:2537039-2543131 FORWARD
BnaC09g44080D	-1.12029	3.6	minor CHO metabolism.callose	Symbols: ATGSL12, gsl12 | ATGSL12 (glucan synthase-like 12); 1,3-beta-glucan synthase/ transferase, transferring glycosyl groups | chr5:4110295-4121427 REVERSE
BnaC04g12780D	-1.31177	3.6	minor CHO metabolism.callose	Symbols: CALS1, GSL06, ATGSL6, ATGSL06, GSL6 | CALS1 (CALLOSE SYNTHASE 1); 1,3-beta-glucan synthase/ transferase, transferring glycosyl groups | chr1:1647706-1658686 REVERSE
BnaC06g17090D	-1.48389	3.6	minor CHO metabolism.callose	Symbols: ATGSL11, gsl11 | ATGSL11 (glucan synthase-like 11); 1,3-beta-glucan synthase/ transferase, transferring glycosyl groups | chr3:21843407-21853860 FORWARD
BnaC09g00800D	3.38038	3.6	minor CHO metabolism.callose	Symbols: ATGSL05, GSL05, ATGSL5, PMR4, GSL5 | ATGSL05 (GLUCAN SYNTHASE-LIKE 5); 1,3-beta-glucan synthase/ transferase, transferring glycosyl groups | chr4:1573348-1579696 FORWARD
BnaA06g17680D	-1.46532	3.7	minor CHO metabolism.sugar kinases	xylulose kinase, putative | chr5:20152781-20155768 FORWARD
BnaC03g56330D	-1.66555	3.7	minor CHO metabolism.sugar kinases	xylulose kinase, putative | chr5:20152781-20155768 FORWARD
BnaC09g31460D	2.80236	5.2	fermentation.PDC	Symbols: PDC2 | PDC2 (pyruvate decarboxylase-2); carboxy-lyase/ catalytic/ magnesium ion binding / pyruvate decarboxylase/ thiamin pyrophosphate binding | chr5:22310687-22312761 REVERSE
BnaA10g09270D	2.92283	5.2	fermentation.PDC	Symbols: PDC2 | PDC2 (pyruvate decarboxylase-2); carboxy-lyase/ catalytic/ magnesium ion binding / pyruvate decarboxylase/ thiamin pyrophosphate binding | chr5:22310687-22312761 REVERSE
BnaCnng03960D	5.44846	5.2	fermentation.PDC	pyruvate decarboxylase, putative | chr4:15952289-15954771 REVERSE
BnaA07g33310D	1.8372	5.3	fermentation.ADH	Symbols: ADH1, ADH, ATADH, ATADH1 | ADH1 (ALCOHOL DEHYDROGENASE 1); alcohol dehydrogenase | chr1:28975394-28977417 FORWARD
BnaA05g03050D	-1.3831	6.1	gluconeogenesis / glyoxylate cycle.citrate synthase	Symbols: CSY3 | CSY3 (citrate synthase 3); citrate (SI)-synthase | chr2:17801471-17806049 REVERSE
BnaC04g52580D	-1.02937	6.1	gluconeogenesis / glyoxylate cycle.citrate synthase	Symbols: CSY3 | CSY3 (citrate synthase 3); citrate (SI)-synthase | chr2:17801471-17806049 REVERSE
BnaAnng00830D	-2.90689	6.2	gluconeogenesis / glyoxylate cycle.malate synthase	Symbols: MLS | MLS (MALATE SYNTHASE); malate synthase | chr5:1032103-1034570 REVERSE
BnaA10g22420D	-1.3868	6.3	gluconeogenesis / glyoxylate cycle.Malate DH	Symbols: PMDH1 | PMDH1 (PEROXISOMAL NAD-MALATE DEHYDROGENASE 1); L-malate dehydrogenase/ binding / catalytic/ malate dehydrogenase/ oxidoreductase/ oxidoreductase, acting on the CH-OH group of donors, NAD or NADP as acceptor | chr2:9689415-9692154 REVERSE
BnaC03g65500D	-7.78136	6.3	gluconeogenesis / glyoxylate cycle.Malate DH	Symbols: PMDH1 | PMDH1 (PEROXISOMAL NAD-MALATE DEHYDROGENASE 1); L-malate dehydrogenase/ binding / catalytic/ malate dehydrogenase/ oxidoreductase/ oxidoreductase, acting on the CH-OH group of donors, NAD or NADP as acceptor | chr2:9689415-9692154 REVERSE
BnaC07g46800D	-4.11548	6.4	gluconeogenesis / glyoxylate cycle.PEPCK	Symbols: PCK1, PEPCK | PCK1 (PHOSPHOENOLPYRUVATE CARBOXYKINASE 1); ATP binding / phosphoenolpyruvate carboxykinase (ATP)/ phosphoenolpyruvate carboxykinase/ purine nucleotide binding | chr4:17802694-17806539 REVERSE
BnaA06g24600D	6.62936	6.4	gluconeogenesis / glyoxylate cycle.PEPCK	Symbols: PCK2, PEPCK | PCK2 (PHOSPHOENOLPYRUVATE CARBOXYKINASE 2); ATP binding / phosphoenolpyruvate carboxykinase (ATP)/ phosphoenolpyruvate carboxykinase/ purine nucleotide binding | chr5:26266340-26269616 FORWARD
BnaCnng13230D	10.0857	6.4	gluconeogenesis / glyoxylate cycle.PEPCK	Symbols: PCK2, PEPCK | PCK2 (PHOSPHOENOLPYRUVATE CARBOXYKINASE 2); ATP binding / phosphoenolpyruvate carboxykinase (ATP)/ phosphoenolpyruvate carboxykinase/ purine nucleotide binding | chr5:26266340-26269616 FORWARD
BnaC01g01140D	-1.86727	6.4	gluconeogenesis / glyoxylate cycle.PEPCK	Symbols: PCK1, PEPCK | PCK1 (PHOSPHOENOLPYRUVATE CARBOXYKINASE 1); ATP binding / phosphoenolpyruvate carboxykinase (ATP)/ phosphoenolpyruvate carboxykinase/ purine nucleotide binding | chr4:17802694-17806539 REVERSE
BnaA01g18440D	1.46946	6.5	gluconeogenesis / glyoxylate cycle.pyruvate dikinase	Symbols: PPDK | PPDK (pyruvate orthophosphate dikinase); kinase/ pyruvate, phosphate dikinase | chr4:8864828-8870801 REVERSE
BnaCnng27780D	1.79599	6.5	gluconeogenesis / glyoxylate cycle.pyruvate dikinase	Symbols: PPDK | PPDK (pyruvate orthophosphate dikinase); kinase/ pyruvate, phosphate dikinase | chr4:8864828-8870801 REVERSE
BnaUnng05120D	2.02431	6.5	gluconeogenesis / glyoxylate cycle.pyruvate dikinase	Symbols: PPDK | PPDK (pyruvate orthophosphate dikinase); kinase/ pyruvate, phosphate dikinase | chr4:8864828-8870801 REVERSE
BnaC07g33060D	-1.2026	6.5	gluconeogenesis / glyoxylate cycle.pyruvate dikinase	Symbols: PPDK | PPDK (pyruvate orthophosphate dikinase); kinase/ pyruvate, phosphate dikinase | chr4:8864828-8870801 REVERSE
BnaA09g19760D	-1.37153	7.3	OPP.electron transfer	Symbols: ATRFNR1 | ATRFNR1 (ROOT FNR 1); FAD binding / NADP or NADPH binding / electron carrier/ ferredoxin-NADP+ reductase/ oxidoreductase | chr4:2738715-2740655 REVERSE
BnaA09g26030D	-1.02084	7.3	OPP.electron transfer	Symbols: ATRFNR2 | ATRFNR2 (ROOT FNR 2); FAD binding / NADP or NADPH binding / electron carrier/ ferredoxin-NADP+ reductase/ oxidoreductase | chr1:10806985-10809180 REVERSE
BnaC09g21770D	-1.16792	7.3	OPP.electron transfer	Symbols: ATRFNR1 | ATRFNR1 (ROOT FNR 1); FAD binding / NADP or NADPH binding / electron carrier/ ferredoxin-NADP+ reductase/ oxidoreductase | chr4:2738715-2740655 REVERSE
BnaA04g15880D	2.46182	7.3	OPP.electron transfer	Symbols: ATFD3 | ATFD3 (ferredoxin 3); 2 iron, 2 sulfur cluster binding / electron carrier/ iron-sulfur cluster binding | chr2:11758079-11759476 REVERSE
BnaC05g23490D	-1.12641	7.3	OPP.electron transfer	Symbols: ATRFNR2 | ATRFNR2 (ROOT FNR 2); FAD binding / NADP or NADPH binding / electron carrier/ ferredoxin-NADP+ reductase/ oxidoreductase | chr1:10806985-10809180 REVERSE
BnaC07g44310D	1.02409	8.3	TCA / org transformation.carbonic anhydrases	Symbols: ATBCA5, BCA5 | carbonic anhydrase family protein / carbonate dehydratase family protein | chr4:16138360-16141624 FORWARD
BnaC03g66520D	1.15896	8.3	TCA / org transformation.carbonic anhydrases	Symbols: ATBCA5, BCA5 | carbonic anhydrase family protein / carbonate dehydratase family protein | chr4:16138360-16141624 FORWARD
BnaA08g11540D	2.52696	8.3	TCA / org transformation.carbonic anhydrases	Symbols: ATBCA5, BCA5 | carbonic anhydrase family protein / carbonate dehydratase family protein | chr4:16138360-16141624 FORWARD
BnaA01g21620D	-3.11779	8.3	TCA / org transformation.carbonic anhydrases	Symbols: ATBCA6, BCA6 | carbonic anhydrase family protein / carbonate dehydratase family protein | chr1:21537935-21539914 REVERSE
BnaA03g52570D	1.17544	8.3	TCA / org transformation.carbonic anhydrases	Symbols: ATBCA5, BCA5 | carbonic anhydrase family protein / carbonate dehydratase family protein | chr4:16138360-16141624 FORWARD
BnaC01g27750D	-1.7386	8.3	TCA / org transformation.carbonic anhydrases	Symbols: ATBCA6, BCA6 | carbonic anhydrase family protein / carbonate dehydratase family protein | chr1:21537935-21539914 REVERSE
BnaC03g17150D	8.98489	8.3	TCA / org transformation.carbonic anhydrases	Symbols: ATACA7, ACA7 | ACA7 (ALPHA CARBONIC ANHYDRASE 7); carbonate dehydratase/ zinc ion binding | chr1:2516991-2518546 REVERSE
BnaC07g13050D	-2.43976	8.3	TCA / org transformation.carbonic anhydrases	Symbols: ATBCA3, BCA3 | BCA3 (BETA CARBONIC ANHYDRASE 4); carbonate dehydratase/ zinc ion binding | chr1:8395557-8398144 FORWARD
BnaCnng05580D	1.95481	8.3	TCA / org transformation.carbonic anhydrases	Symbols: CA1 | CA1 (CARBONIC ANHYDRASE 1); carbonate dehydratase/ zinc ion binding | chr3:194724-198019 REVERSE
BnaA01g02470D	-1.15713	9	mitochondrial electron transport / ATP synthesis	complex 1 family protein / LVR family protein | chr4:16556825-16558846 FORWARD
BnaC04g02910D	-1.82728	9.3	mitochondrial electron transport / ATP synthesis.electron transfer flavoprotein	Symbols: ETFQO | ETFQO (electron-transfer flavoprotein:ubiquinone oxidoreductase); catalytic/ electron carrier/ electron-transferring-flavoprotein dehydrogenase | chr2:18021180-18025292 FORWARD
BnaA05g03290D	-1.29538	9.3	mitochondrial electron transport / ATP synthesis.electron transfer flavoprotein	Symbols: ETFQO | ETFQO (electron-transfer flavoprotein:ubiquinone oxidoreductase); catalytic/ electron carrier/ electron-transferring-flavoprotein dehydrogenase | chr2:18021180-18025292 FORWARD
BnaC03g68740D	-1.09162	9.3	mitochondrial electron transport / ATP synthesis.electron transfer flavoprotein	Symbols: ETFALPHA | ETFALPHA (electron transfer flavoprotein alpha); FAD binding / electron carrier | chr1:18877812-18880010 REVERSE
BnaAnng23570D	-1.00439	9.5	mitochondrial electron transport / ATP synthesis.cytochrome c reductase	unknown protein | chr1:13700814-13701632 FORWARD
BnaC01g25020D	-1.83035	9.5	mitochondrial electron transport / ATP synthesis.cytochrome c reductase	unknown protein | chr1:13700814-13701632 FORWARD
BnaA03g55270D	-1.7438	9.5	mitochondrial electron transport / ATP synthesis.cytochrome c reductase	ubiquinol-cytochrome C reductase complex ubiquinone-binding protein, putative / ubiquinol-cytochrome C reductase complex 8.2 kDa protein, putative | chr5:1590797-1591903 REVERSE
BnaA08g31320D	-1.06585	9.5	mitochondrial electron transport / ATP synthesis.cytochrome c reductase	ubiquinol-cytochrome C reductase complex 7.8 kDa protein, putative / mitochondrial hinge protein, putative | chr1:5202648-5204193 FORWARD
BnaC02g33620D	-2.83325	9.5	mitochondrial electron transport / ATP synthesis.cytochrome c reductase	ubiquinol-cytochrome C reductase complex 7.8 kDa protein, putative / mitochondrial hinge protein, putative | chr1:5202648-5204193 FORWARD
BnaA03g24240D	1.70713	9.6	mitochondrial electron transport / ATP synthesis.cytochrome c	Symbols: CYTC-2 | CYTC-2 (cytochrome c-2); electron carrier/ heme binding / iron ion binding | chr4:6276998-6278509 FORWARD
BnaC03g28810D	2.65389	9.6	mitochondrial electron transport / ATP synthesis.cytochrome c	Symbols: CYTC-2 | CYTC-2 (cytochrome c-2); electron carrier/ heme binding / iron ion binding | chr4:6276998-6278509 FORWARD
BnaA07g10260D	1.89858	9.6	mitochondrial electron transport / ATP synthesis.cytochrome c	Symbols: CYTC-1, ATCYTC-A | CYTC-1 (CYTOCHROME C-1); electron carrier/ heme binding / iron ion binding | chr1:8079287-8080574 FORWARD
BnaA08g02730D	-1.31227	9.6	mitochondrial electron transport / ATP synthesis.cytochrome c	cytochrome c biogenesis protein family | chr1:18276707-18279528 FORWARD
BnaA09g32350D	1.86817	9.6	mitochondrial electron transport / ATP synthesis.cytochrome c	Symbols: ATG1 | ATG1 (ARABIDOPSIS TRANSMEMBRANE PROTEIN G1P-RELATED 1) | chr3:19209585-19210744 REVERSE
BnaAnng32390D	-1.03937	9.6	mitochondrial electron transport / ATP synthesis.cytochrome c	Symbols: ATCCMH, CCMH | CCMH; oxidoreductase | chr1:5240199-5241538 REVERSE
BnaC04g32920D	-1.91938	9.6	mitochondrial electron transport / ATP synthesis.cytochrome c	cytochrome c1, putative | chr5:16339893-16342644 FORWARD
BnaC07g13460D	1.77212	9.6	mitochondrial electron transport / ATP synthesis.cytochrome c	Symbols: CYTC-1, ATCYTC-A | CYTC-1 (CYTOCHROME C-1); electron carrier/ heme binding / iron ion binding | chr1:8079287-8080574 FORWARD
BnaC09g01370D	2.24837	9.6	mitochondrial electron transport / ATP synthesis.cytochrome c	cytochrome c1, putative | chr3:10055789-10058716 REVERSE
BnaCnng12760D	2.74416	9.6	mitochondrial electron transport / ATP synthesis.cytochrome c	Symbols: CCB452 | cytochrome c biogenesis orf452 | chrM:51293-53611 REVERSE
BnaA08g20820D	-1.63141	9.7	mitochondrial electron transport / ATP synthesis.cytochrome c oxidase	Symbols: COX6B, ATCOX6B2 | COX6B (CYTOCHROME C OXIDASE 6B); cytochrome-c oxidase | chr1:7925121-7927278 FORWARD
BnaC01g34600D	-3.3031	9.7	mitochondrial electron transport / ATP synthesis.cytochrome c oxidase	Symbols: SURF1 | SURF1 (SURFEIT 1) | chr3:6133528-6136371 FORWARD
BnaC03g71360D	-1.36457	9.7	mitochondrial electron transport / ATP synthesis.cytochrome c oxidase	cytochrome c oxidase assembly protein CtaG / Cox11 family | chr1:490925-492926 FORWARD
BnaC06g18510D	-1.4928	9.7	mitochondrial electron transport / ATP synthesis.cytochrome c oxidase	cytochrome c oxidase subunit Vc, putative / COX5C, putative | chr5:24653422-24654860 REVERSE
BnaC08g05980D	-1.69296	9.7	mitochondrial electron transport / ATP synthesis.cytochrome c oxidase	Symbols: COX6B, ATCOX6B2 | COX6B (CYTOCHROME C OXIDASE 6B); cytochrome-c oxidase | chr1:7925121-7927278 FORWARD
BnaC09g15780D	-2.45013	9.7	mitochondrial electron transport / ATP synthesis.cytochrome c oxidase	membrane bound O-acyl transferase (MBOAT) family protein | chr1:21330512-21334727 REVERSE
BnaA10g01110D	6.5157	9.7	mitochondrial electron transport / ATP synthesis.cytochrome c oxidase	cytochrome c oxidase assembly protein CtaG / Cox11 family | chr1:490925-492926 FORWARD
BnaC05g07220D	10.9391	9.7	mitochondrial electron transport / ATP synthesis.cytochrome c oxidase	Cox19 family protein (CHCH motif); CONTAINS InterPro DOMAIN/s: MTCP1 (InterPro:IPR009069).
BnaA05g23900D	-1.62202	9.7	mitochondrial electron transport / ATP synthesis.cytochrome c oxidase	cytochrome c oxidase family protein | chr3:5299110-5301745 FORWARD
BnaA06g05680D	1.99311	9.7	mitochondrial electron transport / ATP synthesis.cytochrome c oxidase	Cox19 family protein (CHCH motif); CONTAINS InterPro DOMAIN/s: MTCP1 (InterPro:IPR009069).
BnaAnng26290D	-1.30594	9.7	mitochondrial electron transport / ATP synthesis.cytochrome c oxidase	cytochrome c oxidase family protein | chr1:30169456-30171101 REVERSE
BnaA01g13950D	-5.26326	9.8	mitochondrial electron transport / ATP synthesis.uncoupling protein	Symbols: DIC2 | mitochondrial substrate carrier family protein | chr4:12686459-12687650 FORWARD
BnaA02g07340D	-1.66915	9.8	mitochondrial electron transport / ATP synthesis.uncoupling protein	Symbols: ATUCP2 | ATUCP2 (UNCOUPLING PROTEIN 2); oxidative phosphorylation uncoupler | chr5:23808461-23811258 REVERSE
BnaA10g29330D	-3.56071	9.8	mitochondrial electron transport / ATP synthesis.uncoupling protein	Symbols: ATUCP2 | ATUCP2 (UNCOUPLING PROTEIN 2); oxidative phosphorylation uncoupler | chr5:23808461-23811258 REVERSE
BnaC01g16430D	-3.81675	9.8	mitochondrial electron transport / ATP synthesis.uncoupling protein	Symbols: DIC2 | mitochondrial substrate carrier family protein | chr4:12686459-12687650 FORWARD
BnaC09g34250D	-2.24185	9.8	mitochondrial electron transport / ATP synthesis.uncoupling protein	Symbols: ATUCP2 | ATUCP2 (UNCOUPLING PROTEIN 2); oxidative phosphorylation uncoupler | chr5:23808461-23811258 REVERSE
BnaC02g10400D	-1.94688	9.8	mitochondrial electron transport / ATP synthesis.uncoupling protein	Symbols: ATUCP2 | ATUCP2 (UNCOUPLING PROTEIN 2); oxidative phosphorylation uncoupler | chr5:23808461-23811258 REVERSE
BnaA03g36100D	-1.7239	9.9	mitochondrial electron transport / ATP synthesis.F1-ATPase	ATP synthase epsilon chain, mitochondrial | chr1:19152615-19153929 FORWARD
BnaA03g47900D	-3.52083	9.9	mitochondrial electron transport / ATP synthesis.F1-ATPase	mitochondrial ATP synthase g subunit family protein | chr4:13281937-13283402 FORWARD
BnaA08g13400D	-1.06166	9.9	mitochondrial electron transport / ATP synthesis.F1-ATPase	mitochondrial ATP synthase g subunit family protein | chr4:14486041-14487777 REVERSE
BnaC01g32170D	-2.31804	9.9	mitochondrial electron transport / ATP synthesis.F1-ATPase	ATP synthase epsilon chain, mitochondrial | chr1:19152615-19153929 FORWARD
BnaC02g04350D	-2.03562	9.9	mitochondrial electron transport / ATP synthesis.F1-ATPase	unknown protein | chr5:4024314-4026741 REVERSE
BnaC02g04760D	-1.0365	9.9	mitochondrial electron transport / ATP synthesis.F1-ATPase	ATP synthase delta chain, mitochondrial, putative / H(+)-transporting two-sector ATPase, delta (OSCP) subunit, putative | chr5:4310314-4312048 REVERSE
BnaC01g20420D	-1.79817	9.9	mitochondrial electron transport / ATP synthesis.F1-ATPase	anion-transporting ATPase family protein | chr5:24422735-24425492 FORWARD
BnaAnng29750D	-1.74102	9.99	mitochondrial electron transport / ATP synthesis.unspecified	coenzyme Q biosynthesis Coq4 family protein / ubiquinone biosynthesis Coq4 family protein | chr2:1121900-1123171 REVERSE
BnaC02g35100D	-1.99664	9.99	mitochondrial electron transport / ATP synthesis.unspecified	coenzyme Q biosynthesis Coq4 family protein / ubiquinone biosynthesis Coq4 family protein | chr2:1121900-1123171 REVERSE
BnaCnng01410D	1.10303	9.99	mitochondrial electron transport / ATP synthesis.unspecified	Symbols: ATABC1, ATATH10 | ATABC1 (ARABIDOPSIS THALIANA ABC TRANSPORTER 1); transporter | chr4:708544-711256 FORWARD
BnaC08g17290D	-1.68046	10.1	cell wall.precursor synthesis	unknown protein | chr1:5909249-5911693 REVERSE
BnaA03g06870D	-1.56087	10.1	cell wall.precursor synthesis	Symbols: DRT101 | DRT101 (DNA-DAMAGE-REPAIR/TOLERATION 101); intramolecular transferase, phosphotransferases / magnesium ion binding | chr5:5981007-5982934 FORWARD
BnaA08g23210D	-1.59174	10.1	cell wall.precursor synthesis	unknown protein | chr1:5909249-5911693 REVERSE
BnaC03g08770D	-2.90689	10.1	cell wall.precursor synthesis	Symbols: DRT101 | DRT101 (DNA-DAMAGE-REPAIR/TOLERATION 101); intramolecular transferase, phosphotransferases / magnesium ion binding | chr5:5981007-5982934 FORWARD
BnaA03g42750D	-2.74932	10.2	cell wall.cellulose synthesis	Symbols: ATCSLA10, CSLA10 | ATCSLA10; cellulose synthase/ transferase, transferring glycosyl groups | chr1:8516238-8519734 REVERSE
BnaA06g31650D	-1.1985	10.2	cell wall.cellulose synthesis	Symbols: ATCSLC04, CSLC04, ATCSLC4, CSLC4 | ATCSLC04 (CELLULOSE-SYNTHASE LIKE C4); cellulose synthase/ transferase, transferring glycosyl groups | chr3:10505829-10509239 FORWARD
BnaA10g26350D	-2.00986	10.2	cell wall.cellulose synthesis	Symbols: ATCSLA09, CSLA09, ATCSLA9, CSLA9, RAT4 | ATCSLA09; mannan synthase/ transferase, transferring glycosyl groups | chr5:985675-990549 REVERSE
BnaC03g01390D	-2.98696	10.2	cell wall.cellulose synthesis	Symbols: ATCSLA09, CSLA09, ATCSLA9, CSLA9, RAT4 | ATCSLA09; mannan synthase/ transferase, transferring glycosyl groups | chr5:985675-990549 REVERSE
BnaC07g33890D	-3.02047	10.2	cell wall.cellulose synthesis	Symbols: ATCSLA10, CSLA10 | ATCSLA10; cellulose synthase/ transferase, transferring glycosyl groups | chr1:8516238-8519734 REVERSE
BnaC08g33880D	-2.14543	10.2	cell wall.cellulose synthesis	Symbols: ATCSLC08, CSLC08, ATCSLC8 | ATCSLC08; cellulose synthase/ transferase, transferring glycosyl groups | chr2:10471303-10474503 REVERSE
BnaCnng02590D	-1.39185	10.2	cell wall.cellulose synthesis	Symbols: ATCSLA09, CSLA09, ATCSLA9, CSLA9, RAT4 | ATCSLA09; mannan synthase/ transferase, transferring glycosyl groups | chr5:985675-990549 REVERSE
BnaA03g23250D	1.64892	10.2	cell wall.cellulose synthesis	Symbols: ATGH9A1, DEC, KOR, RSW2, IRX2, KOR1 | ATGH9A1 (ARABIDOPSIS THALIANA GLYCOSYL HYDROLASE 9A1); cellulase/ hydrolase, hydrolyzing O-glycosyl compounds | chr5:20197391-20200288 REVERSE
BnaA03g01040D	-2.37132	10.2	cell wall.cellulose synthesis	Symbols: ATCSLA09, CSLA09, ATCSLA9, CSLA9, RAT4 | ATCSLA09; mannan synthase/ transferase, transferring glycosyl groups | chr5:985675-990549 REVERSE
BnaA03g23580D	1.50846	10.2	cell wall.cellulose synthesis	Symbols: ATCSLC12, CSLC12 | ATCSLC12 (CELLULOSE-SYNTHASE LIKE C12); cellulose synthase/ transferase, transferring glycosyl groups | chr4:4802341-4805647 REVERSE
BnaA07g09050D	-2.22846	10.2	cell wall.cellulose synthesis	Symbols: ATCSLA10, CSLA10 | ATCSLA10; cellulose synthase/ transferase, transferring glycosyl groups | chr1:8516238-8519734 REVERSE
BnaC02g37250D	1.68993	10.2	cell wall.cellulose synthesis	Symbols: ATCSLC04, CSLC04, ATCSLC4, CSLC4 | ATCSLC04 (CELLULOSE-SYNTHASE LIKE C4); cellulose synthase/ transferase, transferring glycosyl groups | chr3:10505829-10509239 FORWARD
BnaC02g37260D	1.44303	10.2	cell wall.cellulose synthesis	Symbols: ATCSLC04, CSLC04, ATCSLC4, CSLC4 | ATCSLC04 (CELLULOSE-SYNTHASE LIKE C4); cellulose synthase/ transferase, transferring glycosyl groups | chr3:10505829-10509239 FORWARD
BnaC03g10950D	-1.34414	10.2	cell wall.cellulose synthesis	Symbols: ATCSLA02, CSLA02, ATCSLA2 | ATCSLA02; mannan synthase/ transferase, transferring glycosyl groups | chr5:7554928-7560073 REVERSE
BnaC07g43360D	-1.88921	10.2	cell wall.cellulose synthesis	Symbols: ATCSLC05, CSLC05, ATCSLC5 | ATCSLC5 (CELLULOSE-SYNTHASE LIKE C5); cellulose synthase/ transferase, transferring glycosyl groups | chr4:15309506-15312591 REVERSE
BnaC08g49540D	-1.60354	10.2	cell wall.cellulose synthesis	Symbols: PNT1 | PNT1 (PEANUT 1); alpha-1,4-mannosyltransferase/ mannosyltransferase/ transferase, transferring glycosyl groups | chr5:7337158-7340052 REVERSE
BnaUnng03000D	-1.25332	10.2	cell wall.cellulose synthesis	Symbols: ATCSLA10, CSLA10 | ATCSLA10; cellulose synthase/ transferase, transferring glycosyl groups | chr1:8516238-8519734 REVERSE
BnaA03g06300D	-3.09437	10.3	cell wall.hemicellulose synthesis	exostosin family protein | chr5:5551629-5554917 FORWARD
BnaA06g18540D	-2.8685	10.3	cell wall.hemicellulose synthesis	exostosin family protein | chr3:16651963-16653678 FORWARD
BnaA10g17600D	-2.7101	10.3	cell wall.hemicellulose synthesis	exostosin family protein | chr5:5551629-5554917 FORWARD
BnaAnng37860D	-1.80915	10.3	cell wall.hemicellulose synthesis	exostosin family protein | chr3:16651963-16653678 FORWARD
BnaC05g10370D	-4.41709	10.3	cell wall.hemicellulose synthesis	Symbols: FUT8 | FUT8 (FUCOSYLTRANSFERASE 8); galactoside 2-alpha-L-fucosyltransferase | chr1:4827961-4829587 FORWARD
BnaC05g10380D	-6.73697	10.3	cell wall.hemicellulose synthesis	Symbols: FUT8 | FUT8 (FUCOSYLTRANSFERASE 8); galactoside 2-alpha-L-fucosyltransferase | chr1:4827961-4829587 FORWARD
BnaC06g23050D	-2.84609	10.3	cell wall.hemicellulose synthesis	Symbols: FUT3, ATFUT3 | FUT3 (FUCOSYLTRANSFERASE 3); fucosyltransferase/ transferase, transferring glycosyl groups | chr1:27967894-27969803 REVERSE
BnaC08g16010D	-4.03814	10.3	cell wall.hemicellulose synthesis	Symbols: FUT8 | FUT8 (FUCOSYLTRANSFERASE 8); galactoside 2-alpha-L-fucosyltransferase | chr1:4827961-4829587 FORWARD
BnaC08g39900D	-2.94486	10.3	cell wall.hemicellulose synthesis	Symbols: FUT8 | FUT8 (FUCOSYLTRANSFERASE 8); galactoside 2-alpha-L-fucosyltransferase | chr1:4827961-4829587 FORWARD
BnaC09g40970D	-2.1146	10.3	cell wall.hemicellulose synthesis	exostosin family protein | chr5:5551629-5554917 FORWARD
BnaA02g03300D	-1.00184	10.3	cell wall.hemicellulose synthesis	exostosin family protein | chr5:5551629-5554917 FORWARD
BnaA06g33800D	1.30346	10.3	cell wall.hemicellulose synthesis	Symbols: FT1, ATFUT1, ATFT1, MUR2 | FT1 (FUCOSYLTRANSFERASE 1); fucosyltransferase/ transferase, transferring glycosyl groups | chr2:970259-972407 REVERSE
BnaA07g22250D	-2.95311	10.3	cell wall.hemicellulose synthesis	Symbols: FUT3, ATFUT3 | FUT3 (FUCOSYLTRANSFERASE 3); fucosyltransferase/ transferase, transferring glycosyl groups | chr1:27967894-27969803 REVERSE
BnaC01g39770D	7	10.3	cell wall.hemicellulose synthesis	exostosin family protein | chr3:2433267-2434988 REVERSE
BnaC03g55320D	-1.94278	10.3	cell wall.hemicellulose synthesis	exostosin family protein | chr3:16651963-16653678 FORWARD
BnaCnng36170D	-3.9386	10.3	cell wall.hemicellulose synthesis	catalytic | chr5:6836806-6839382 REVERSE
BnaC03g74220D	2.10614	10.4	cell wall.pectin synthesis	Symbols: GAUT8, QUA1 | QUA1 (QUASIMODO 1); polygalacturonate 4-alpha-galacturonosyltransferase/ transferase, transferring glycosyl groups / transferase, transferring hexosyl groups | chr3:9154711-9156845 FORWARD
BnaA03g37710D	1.80006	10.4	cell wall.pectin synthesis	Symbols: GAUT8, QUA1 | QUA1 (QUASIMODO 1); polygalacturonate 4-alpha-galacturonosyltransferase/ transferase, transferring glycosyl groups / transferase, transferring hexosyl groups | chr3:9154711-9156845 FORWARD
BnaA06g16460D	-1.53234	10.5	cell wall.cell wall proteins	Symbols: KING1 | KING1 (SNF1-RELATED PROTEIN KINASE REGULATORY SUBUNIT GAMMA 1) | chr3:17987378-17989763 FORWARD
BnaC08g48500D	-2.1072	10.5	cell wall.cell wall proteins	Symbols: KING1 | KING1 (SNF1-RELATED PROTEIN KINASE REGULATORY SUBUNIT GAMMA 1) | chr3:17987378-17989763 FORWARD
BnaAnng34810D	-1.44726	10.5	cell wall.cell wall proteins	Symbols: KING1 | KING1 (SNF1-RELATED PROTEIN KINASE REGULATORY SUBUNIT GAMMA 1) | chr3:17987378-17989763 FORWARD
BnaC09g05460D	-2.20716	10.6	cell wall.degradation	peptidoglycan-binding LysM domain-containing protein | chr5:24958241-24958769 FORWARD
BnaA02g33200D	-1.78807	10.6	cell wall.degradation	peptidoglycan-binding LysM domain-containing protein | chr5:24958241-24958769 FORWARD
BnaA01g15000D	-2.66032	10.7	cell wall.modification	Symbols: XTR6, XTH23 | XTR6 (XYLOGLUCAN ENDOTRANSGLYCOSYLASE 6); hydrolase, acting on glycosyl bonds / hydrolase, hydrolyzing O-glycosyl compounds / xyloglucan:xyloglucosyl transferase | chr4:13128643-13129884 FORWARD
BnaA02g14330D	-3.8452	10.7	cell wall.modification	Symbols: ATEXPA1, EXP1, AT-EXP1, ATEXP1, ATHEXP ALPHA 1.2 | ATEXPA1 (ARABIDOPSIS THALIANA EXPANSIN A1) | chr1:26141836-26143496 FORWARD
BnaA02g14340D	-3.95155	10.7	cell wall.modification	Symbols: ATEXPA1, EXP1, AT-EXP1, ATEXP1, ATHEXP ALPHA 1.2 | ATEXPA1 (ARABIDOPSIS THALIANA EXPANSIN A1) | chr1:26141836-26143496 FORWARD
BnaA02g26670D	-1.38231	10.7	cell wall.modification	Symbols: ATEXPA15, EXP15, ATEXP15, ATHEXP ALPHA 1.3 | ATEXPA15 (ARABIDOPSIS THALIANA EXPANSIN A15) | chr2:916854-918643 REVERSE
BnaA03g19130D	-5.52356	10.7	cell wall.modification	Symbols: ATEXPA8, EXP8, ATEXP8, ATHEXP ALPHA 1.11 | ATEXPA8 (ARABIDOPSIS THALIANA EXPANSIN A8) | chr2:16948863-16950557 REVERSE
BnaA03g25760D	-2.74584	10.7	cell wall.modification	Symbols: XTH9 | XTH9 (XYLOGLUCAN ENDOTRANSGLUCOSYLASE/HYDROLASE 9); hydrolase, acting on glycosyl bonds / xyloglucan:xyloglucosyl transferase | chr4:1415949-1417327 FORWARD
BnaA03g54320D	-1.76676	10.7	cell wall.modification	xyloglucan:xyloglucosyl transferase, putative / xyloglucan endotransglycosylase, putative / endo-xyloglucan transferase, putative | chr4:17775474-17777397 REVERSE
BnaA03g58790D	-4.00595	10.7	cell wall.modification	Symbols: ATEXPB3, EXPB3, ATHEXP BETA 1.6 | ATEXPB3 (ARABIDOPSIS THALIANA EXPANSIN B3) | chr4:14000038-14002069 REVERSE
BnaA04g16780D	-2.11227	10.7	cell wall.modification	Symbols: ATEXPA6, ATEXP6, ATHEXP ALPHA 1.8 | ATEXPA6 (ARABIDOPSIS THALIANA EXPANSIN A6) | chr2:12431341-12433595 REVERSE
BnaA05g01790D	-2.21356	10.7	cell wall.modification	Symbols: ATEXPA8, EXP8, ATEXP8, ATHEXP ALPHA 1.11 | ATEXPA8 (ARABIDOPSIS THALIANA EXPANSIN A8) | chr2:16948863-16950557 REVERSE
BnaA05g16360D	-3.31762	10.7	cell wall.modification	Symbols: XTR4, XTH30 | XTR4 (XYLOGLUCAN ENDOTRANSGLYCOSYLASE 4); hydrolase, acting on glycosyl bonds / hydrolase, hydrolyzing O-glycosyl compounds / xyloglucan:xyloglucosyl transferase | chr1:11575320-11577927 FORWARD
BnaA05g32450D	-2.11171	10.7	cell wall.modification	Symbols: ATEXPA13, EXP13, ATEXP13, ATHEXP ALPHA 1.22 | ATEXPA13 (ARABIDOPSIS THALIANA EXPANSIN A13) | chr3:742354-744047 REVERSE
BnaA06g07180D	-2.50748	10.7	cell wall.modification	xyloglucan:xyloglucosyl transferase, putative / xyloglucan endotransglycosylase, putative / endo-xyloglucan transferase, putative | chr1:3878550-3880361 REVERSE
BnaA06g33850D	-2.84891	10.7	cell wall.modification	Symbols: ATEXPA15, EXP15, ATEXP15, ATHEXP ALPHA 1.3 | ATEXPA15 (ARABIDOPSIS THALIANA EXPANSIN A15) | chr2:916854-918643 REVERSE
BnaA07g01850D	-1.89433	10.7	cell wall.modification	Symbols: EXLB3 | EXLB3 (EXPANSIN-LIKE B3 PRECURSOR) | chr2:8090658-8091656 REVERSE
BnaA07g28080D	-2.69861	10.7	cell wall.modification	Symbols: ATEXPA1, EXP1, AT-EXP1, ATEXP1, ATHEXP ALPHA 1.2 | ATEXPA1 (ARABIDOPSIS THALIANA EXPANSIN A1) | chr1:26141836-26143496 FORWARD
BnaA09g01390D	-4.91093	10.7	cell wall.modification	Symbols: XTH9 | XTH9 (XYLOGLUCAN ENDOTRANSGLUCOSYLASE/HYDROLASE 9); hydrolase, acting on glycosyl bonds / xyloglucan:xyloglucosyl transferase | chr4:1415949-1417327 FORWARD
BnaAnng17950D	-2.68421	10.7	cell wall.modification	Symbols: ATEXPA20, EXP20, ATEXP20, ATHEXP ALPHA 1.23 | ATEXPA20 (ARABIDOPSIS THALIANA EXPANSIN A20) | chr4:17922756-17923973 REVERSE
BnaC01g17710D	-1.64223	10.7	cell wall.modification	Symbols: XTR6, XTH23 | XTR6 (XYLOGLUCAN ENDOTRANSGLYCOSYLASE 6); hydrolase, acting on glycosyl bonds / hydrolase, hydrolyzing O-glycosyl compounds / xyloglucan:xyloglucosyl transferase | chr4:13128643-13129884 FORWARD
BnaC01g20780D	-2.96361	10.7	cell wall.modification	Symbols: ATEXPB3, EXPB3, ATHEXP BETA 1.6 | ATEXPB3 (ARABIDOPSIS THALIANA EXPANSIN B3) | chr4:14000038-14002069 REVERSE
BnaC02g47920D	-1.55858	10.7	cell wall.modification	Symbols: ATEXPA15, EXP15, ATEXP15, ATHEXP ALPHA 1.3 | ATEXPA15 (ARABIDOPSIS THALIANA EXPANSIN A15) | chr2:916854-918643 REVERSE
BnaC03g22750D	-5.28812	10.7	cell wall.modification	Symbols: ATEXPA8, EXP8, ATEXP8, ATHEXP ALPHA 1.11 | ATEXPA8 (ARABIDOPSIS THALIANA EXPANSIN A8) | chr2:16948863-16950557 REVERSE
BnaC03g55190D	-1.67553	10.7	cell wall.modification	Symbols: XTR8, ATXTR8 | XTR8 (XYLOGLUCAN ENDO-TRANSGLYCOSYLASE-RELATED 8); hydrolase, acting on glycosyl bonds / xyloglucan:xyloglucosyl transferase | chr3:16446975-16448764 REVERSE
BnaC03g73080D	-3.33651	10.7	cell wall.modification	Symbols: XTH9 | XTH9 (XYLOGLUCAN ENDOTRANSGLUCOSYLASE/HYDROLASE 9); hydrolase, acting on glycosyl bonds / xyloglucan:xyloglucosyl transferase | chr4:1415949-1417327 FORWARD
BnaC04g01470D	-2.94285	10.7	cell wall.modification	Symbols: ATEXPA8, EXP8, ATEXP8, ATHEXP ALPHA 1.11 | ATEXPA8 (ARABIDOPSIS THALIANA EXPANSIN A8) | chr2:16948863-16950557 REVERSE
BnaC04g05770D	-4.33789	10.7	cell wall.modification	Symbols: ATEXPA4, ATEXP4, ATHEXP ALPHA 1.6 | ATEXPA4 (ARABIDOPSIS THALIANA EXPANSIN A4) | chr2:16543832-16545584 REVERSE
BnaC04g40170D	-2.5503	10.7	cell wall.modification	Symbols: ATEXPA6, ATEXP6, ATHEXP ALPHA 1.8 | ATEXPA6 (ARABIDOPSIS THALIANA EXPANSIN A6) | chr2:12431341-12433595 REVERSE
BnaC07g46780D	-1.86417	10.7	cell wall.modification	xyloglucan:xyloglucosyl transferase, putative / xyloglucan endotransglycosylase, putative / endo-xyloglucan transferase, putative | chr4:17775474-17777397 REVERSE
BnaC07g50680D	-2.26875	10.7	cell wall.modification	Symbols: ATEXPB3, EXPB3, ATHEXP BETA 1.6 | ATEXPB3 (ARABIDOPSIS THALIANA EXPANSIN B3) | chr4:14000038-14002069 REVERSE
BnaC08g14380D	-4.19586	10.7	cell wall.modification	Symbols: XTH33, XET | XTH33; hydrolase, acting on glycosyl bonds / hydrolase, hydrolyzing O-glycosyl compounds / xyloglucan:xyloglucosyl transferase | chr1:3479153-3480988 REVERSE
BnaCnng06330D	-2.7808	10.7	cell wall.modification	Symbols: ATEXPA13, EXP13, ATEXP13, ATHEXP ALPHA 1.22 | ATEXPA13 (ARABIDOPSIS THALIANA EXPANSIN A13) | chr3:742354-744047 REVERSE
BnaCnng18010D	-2.73064	10.7	cell wall.modification	xyloglucan:xyloglucosyl transferase, putative / xyloglucan endotransglycosylase, putative / endo-xyloglucan transferase, putative | chr1:3878550-3880361 REVERSE
BnaCnng24730D	-3.6081	10.7	cell wall.modification	xyloglucan:xyloglucosyl transferase, putative / xyloglucan endotransglycosylase, putative / endo-xyloglucan transferase, putative | chr2:15472645-15474681 REVERSE
BnaCnng38050D	-1.80199	10.7	cell wall.modification	xyloglucan:xyloglucosyl transferase, putative / xyloglucan endotransglycosylase, putative / endo-xyloglucan transferase, putative | chr3:8550110-8551335 FORWARD
BnaCnng64440D	-3.773	10.7	cell wall.modification	Symbols: ATEXPA4, ATEXP4, ATHEXP ALPHA 1.6 | ATEXPA4 (ARABIDOPSIS THALIANA EXPANSIN A4) | chr2:16543832-16545584 REVERSE
BnaCnng71550D	-3.69481	10.7	cell wall.modification	Symbols: ATEXPA1, EXP1, AT-EXP1, ATEXP1, ATHEXP ALPHA 1.2 | ATEXPA1 (ARABIDOPSIS THALIANA EXPANSIN A1) | chr1:26141836-26143496 FORWARD
BnaCnng71940D	-3.3294	10.7	cell wall.modification	Symbols: EXLB3 | EXLB3 (EXPANSIN-LIKE B3 PRECURSOR) | chr2:8090658-8091656 REVERSE
BnaA04g22910D	1.09265	10.7	cell wall.modification	Symbols: ATEXPA4, ATEXP4, ATHEXP ALPHA 1.6 | ATEXPA4 (ARABIDOPSIS THALIANA EXPANSIN A4) | chr2:16543832-16545584 REVERSE
BnaA06g24680D	1.70197	10.7	cell wall.modification	xyloglucan:xyloglucosyl transferase, putative / xyloglucan endotransglycosylase, putative / endo-xyloglucan transferase, putative | chr5:26299032-26300478 FORWARD
BnaA06g34490D	1.7042	10.7	cell wall.modification	Symbols: EXGT-A3, XTH27, ATXTH27 | EXGT-A3; hydrolase, acting on glycosyl bonds / xyloglucan:xyloglucosyl transferase | chr2:385199-387344 FORWARD
BnaC07g21270D	1.71301	10.7	cell wall.modification	Symbols: EXGT-A3, XTH27, ATXTH27 | EXGT-A3; hydrolase, acting on glycosyl bonds / xyloglucan:xyloglucosyl transferase | chr2:385199-387344 FORWARD
BnaCnng13310D	1.76883	10.7	cell wall.modification	xyloglucan:xyloglucosyl transferase, putative / xyloglucan endotransglycosylase, putative / endo-xyloglucan transferase, putative | chr5:26299032-26300478 FORWARD
BnaA04g03540D	1.94702	10.7	cell wall.modification	Symbols: ATEXPA16, EXP16, ATEXP16, ATHEXP ALPHA 1.7 | ATEXPA16 (ARABIDOPSIS THALIANA EXPANSIN A16) | chr3:20574831-20576182 REVERSE
BnaCnng23400D	2.06496	10.7	cell wall.modification	Symbols: ATEXLA1, EXPL1, ATEXPL1, ATHEXP BETA 2.1 | ATEXLA1 (ARABIDOPSIS THALIANA EXPANSIN-LIKE A1) | chr3:16896166-16897308 FORWARD
BnaAnng17970D	2.32433	10.7	cell wall.modification	Symbols: ATEXLA1, EXPL1, ATEXPL1, ATHEXP BETA 2.1 | ATEXLA1 (ARABIDOPSIS THALIANA EXPANSIN-LIKE A1) | chr3:16896166-16897308 FORWARD
BnaCnng43640D	2.63743	10.7	cell wall.modification	Symbols: ATEXLA1, EXPL1, ATEXPL1, ATHEXP BETA 2.1 | ATEXLA1 (ARABIDOPSIS THALIANA EXPANSIN-LIKE A1) | chr3:16896166-16897308 FORWARD
BnaA09g35150D	3.22189	10.7	cell wall.modification	Symbols: ATEXPA16, EXP16, ATEXP16, ATHEXP ALPHA 1.7 | ATEXPA16 (ARABIDOPSIS THALIANA EXPANSIN A16) | chr3:20574831-20576182 REVERSE
BnaC08g26400D	3.73568	10.7	cell wall.modification	Symbols: ATEXPA16, EXP16, ATEXP16, ATHEXP ALPHA 1.7 | ATEXPA16 (ARABIDOPSIS THALIANA EXPANSIN A16) | chr3:20574831-20576182 REVERSE
BnaAnng31590D	4.05063	10.7	cell wall.modification	Symbols: XTR9 | XTR9 (XYLOGLUCAN ENDOTRANSGLYCOSYLASE 9); hydrolase, acting on glycosyl bonds / hydrolase, hydrolyzing O-glycosyl compounds / xyloglucan:xyloglucosyl transferase | chr4:13130297-13131788 FORWARD
BnaA03g50070D	4.90751	10.7	cell wall.modification	Symbols: ATXTH20, XTH20 | XTH20 (XYLOGLUCAN ENDOTRANSGLUCOSYLASE/HYDROLASE 20); hydrolase, acting on glycosyl bonds / hydrolase, hydrolyzing O-glycosyl compounds / xyloglucan:xyloglucosyl transferase | chr5:19482106-19483452 FORWARD
BnaA06g40800D	4.92251	10.7	cell wall.modification	Symbols: ATEXLA1, EXPL1, ATEXPL1, ATHEXP BETA 2.1 | ATEXLA1 (ARABIDOPSIS THALIANA EXPANSIN-LIKE A1) | chr3:16896166-16897308 FORWARD
BnaCnng78620D	4.9814	10.7	cell wall.modification	Symbols: ATEXLA1, EXPL1, ATEXPL1, ATHEXP BETA 2.1 | ATEXLA1 (ARABIDOPSIS THALIANA EXPANSIN-LIKE A1) | chr3:16896166-16897308 FORWARD
BnaC04g25430D	5.11969	10.7	cell wall.modification	Symbols: ATEXPA16, EXP16, ATEXP16, ATHEXP ALPHA 1.7 | ATEXPA16 (ARABIDOPSIS THALIANA EXPANSIN A16) | chr3:20574831-20576182 REVERSE
BnaC07g42530D	5.82914	10.7	cell wall.modification	Symbols: ATXTH20, XTH20 | XTH20 (XYLOGLUCAN ENDOTRANSGLUCOSYLASE/HYDROLASE 20); hydrolase, acting on glycosyl bonds / hydrolase, hydrolyzing O-glycosyl compounds / xyloglucan:xyloglucosyl transferase | chr5:19482106-19483452 FORWARD
BnaA03g55050D	-1.72301	10.7	cell wall.modification	Symbols: ATEXPA9, EXP9, ATEXP9, ATHEXP ALPHA 1.10 | ATEXPA9 (ARABIDOPSIS THALIANA EXPANSIN A9) | chr5:463158-465246 FORWARD
BnaA05g05910D	-3.28367	10.7	cell wall.modification	Symbols: ATEXPA4, ATEXP4, ATHEXP ALPHA 1.6 | ATEXPA4 (ARABIDOPSIS THALIANA EXPANSIN A4) | chr2:16543832-16545584 REVERSE
BnaA05g07550D	-2.2854	10.7	cell wall.modification	xyloglucan:xyloglucosyl transferase, putative / xyloglucan endotransglycosylase, putative / endo-xyloglucan transferase, putative | chr2:15472645-15474681 REVERSE
BnaA06g18630D	-1.33776	10.7	cell wall.modification	Symbols: XTR8, ATXTR8 | XTR8 (XYLOGLUCAN ENDO-TRANSGLYCOSYLASE-RELATED 8); hydrolase, acting on glycosyl bonds / xyloglucan:xyloglucosyl transferase | chr3:16446975-16448764 REVERSE
BnaA07g00550D	-1.65637	10.7	cell wall.modification	Symbols: ATEXPB1, EXPB1, ATHEXP BETA 1.5 | ATEXPB1 (ARABIDOPSIS THALIANA EXPANSIN B1) | chr2:8941119-8942689 FORWARD
BnaA07g14280D	2.03185	10.7	cell wall.modification	Symbols: ATEXPA6, ATEXP6, ATHEXP ALPHA 1.8 | ATEXPA6 (ARABIDOPSIS THALIANA EXPANSIN A6) | chr2:12431341-12433595 REVERSE
BnaA08g06970D	1.75964	10.7	cell wall.modification	Symbols: XTR4, XTH30 | XTR4 (XYLOGLUCAN ENDOTRANSGLYCOSYLASE 4); hydrolase, acting on glycosyl bonds / hydrolase, hydrolyzing O-glycosyl compounds / xyloglucan:xyloglucosyl transferase | chr1:11575320-11577927 FORWARD
BnaA08g25690D	-10.3406	10.7	cell wall.modification	Symbols: XTH33, XET | XTH33; hydrolase, acting on glycosyl bonds / hydrolase, hydrolyzing O-glycosyl compounds / xyloglucan:xyloglucosyl transferase | chr1:3479153-3480988 REVERSE
BnaA09g29240D	-3.20254	10.7	cell wall.modification	Symbols: ATEXPA10, AT-EXP10, ATEXP10, ATHEXP ALPHA 1.1, EXP10 | ATEXPA10 (ARABIDOPSIS THALIANA EXPANSIN A 10); structural constituent of cell wall | chr1:9259750-9260792 FORWARD
BnaA09g45510D	-1.44947	10.7	cell wall.modification	Symbols: XTR2, EXGT-A2, ATXTH28 | XTR2 (XYLOGLUCAN ENDOTRANSGLYCOSYLASE RELATED 2); hydrolase, acting on glycosyl bonds / xyloglucan:xyloglucosyl transferase | chr1:5066636-5068645 REVERSE
BnaAnng00290D	-1.39095	10.7	cell wall.modification	Symbols: ATEXPA9, EXP9, ATEXP9, ATHEXP ALPHA 1.10 | ATEXPA9 (ARABIDOPSIS THALIANA EXPANSIN A9) | chr5:463158-465246 FORWARD
BnaAnng35740D	-1.46287	10.7	cell wall.modification	Symbols: EXGT-A3, XTH27, ATXTH27 | EXGT-A3; hydrolase, acting on glycosyl bonds / xyloglucan:xyloglucosyl transferase | chr2:385199-387344 FORWARD
BnaC01g25620D	-4.39993	10.7	cell wall.modification	xyloglucan:xyloglucosyl transferase, putative / xyloglucan endotransglycosylase, putative / endo-xyloglucan transferase, putative | chr3:18007181-18008488 FORWARD
BnaC02g03580D	-3.57568	10.7	cell wall.modification	Symbols: ATEXPA9, EXP9, ATEXP9, ATHEXP ALPHA 1.10 | ATEXPA9 (ARABIDOPSIS THALIANA EXPANSIN A9) | chr5:463158-465246 FORWARD
BnaC03g22200D	-2.13162	10.7	cell wall.modification	Symbols: ATEXPA4, ATEXP4, ATHEXP ALPHA 1.6 | ATEXPA4 (ARABIDOPSIS THALIANA EXPANSIN A4) | chr2:16543832-16545584 REVERSE
BnaC05g28950D	-1.62344	10.7	cell wall.modification	Symbols: XTR4, XTH30 | XTR4 (XYLOGLUCAN ENDOTRANSGLYCOSYLASE 4); hydrolase, acting on glycosyl bonds / hydrolase, hydrolyzing O-glycosyl compounds / xyloglucan:xyloglucosyl transferase | chr1:11575320-11577927 FORWARD
BnaC06g30760D	-2.70248	10.7	cell wall.modification	Symbols: ATEXPA1, EXP1, AT-EXP1, ATEXP1, ATHEXP ALPHA 1.2 | ATEXPA1 (ARABIDOPSIS THALIANA EXPANSIN A1) | chr1:26141836-26143496 FORWARD
BnaC07g22080D	-1.55394	10.7	cell wall.modification	Symbols: ATEXPA15, EXP15, ATEXP15, ATHEXP ALPHA 1.3 | ATEXPA15 (ARABIDOPSIS THALIANA EXPANSIN A15) | chr2:916854-918643 REVERSE
BnaC07g35670D	2.73985	10.7	cell wall.modification	xyloglucan:xyloglucosyl transferase, putative / xyloglucan endotransglycosylase, putative / endo-xyloglucan transferase, putative | chr4:10401910-10404248 REVERSE
BnaC08g39360D	-1.34496	10.7	cell wall.modification	Symbols: XTR2, EXGT-A2, ATXTH28 | XTR2 (XYLOGLUCAN ENDOTRANSGLYCOSYLASE RELATED 2); hydrolase, acting on glycosyl bonds / xyloglucan:xyloglucosyl transferase | chr1:5066636-5068645 REVERSE
BnaCnng40260D	-3.20033	10.7	cell wall.modification	Symbols: ATEXPA10, AT-EXP10, ATEXP10, ATHEXP ALPHA 1.1, EXP10 | ATEXPA10 (ARABIDOPSIS THALIANA EXPANSIN A 10); structural constituent of cell wall | chr1:9259750-9260792 FORWARD
BnaCnng51340D	3.09399	10.7	cell wall.modification	Symbols: ATEXPA5, ATEXP5, ATHEXP ALPHA 1.4, EXP5, EXPA5 | EXPA5 (EXPANSIN A5) | chr3:11011308-11013358 REVERSE
BnaCnng55390D	-3.44374	10.7	cell wall.modification	Symbols: ATEXPA11, EXP11, ATEXP11, ATHEXP ALPHA 1.14 | ATEXPA11 (ARABIDOPSIS THALIANA EXPANSIN 11) | chr1:6998489-6999817 REVERSE
BnaA02g22590D	-2.90004	11	lipid metabolism	tetraacyldisaccharide 4'-kinase family protein | chr3:7151424-7153392 REVERSE
BnaC02g30980D	-3.68182	11	lipid metabolism	tetraacyldisaccharide 4'-kinase family protein | chr3:7151424-7153392 REVERSE
BnaA05g06580D	-2.52893	11.3	lipid metabolism.Phospholipid synthesis	Symbols: ATGPAT6, GPAT6 | GPAT6 (GLYCEROL-3-PHOSPHATE ACYLTRANSFERASE 6); 1-acylglycerol-3-phosphate O-acyltransferase/ acyltransferase | chr2:15952607-15955494 REVERSE
BnaAnng23770D	-2.85228	11.3	lipid metabolism.Phospholipid synthesis	phosphatidyl serine synthase family protein | chr1:5199018-5202175 FORWARD
BnaCnng43470D	-1.72405	11.3	lipid metabolism.Phospholipid synthesis	Symbols: ATGPAT6, GPAT6 | GPAT6 (GLYCEROL-3-PHOSPHATE ACYLTRANSFERASE 6); 1-acylglycerol-3-phosphate O-acyltransferase/ acyltransferase | chr2:15952607-15955494 REVERSE
BnaA10g01090D	1.31484	11.3	lipid metabolism.Phospholipid synthesis	Symbols: ATGPAT2, GPAT2 | GPAT2 (GLYCEROL-3-PHOSPHATE ACYLTRANSFERASE 2); acyltransferase | chr1:480852-483292 FORWARD
BnaA10g00370D	1.38136	11.3	lipid metabolism.Phospholipid synthesis	Symbols: ATGPAT4, GPAT4 | GPAT4 (GLYCEROL-3-PHOSPHATE ACYLTRANSFERASE 4); 1-acylglycerol-3-phosphate O-acyltransferase/ acyltransferase | chr1:221691-224340 REVERSE
BnaC05g00450D	1.9186	11.3	lipid metabolism.Phospholipid synthesis	Symbols: ATGPAT4, GPAT4 | GPAT4 (GLYCEROL-3-PHOSPHATE ACYLTRANSFERASE 4); 1-acylglycerol-3-phosphate O-acyltransferase/ acyltransferase | chr1:221691-224340 REVERSE
BnaAnng14270D	1.99252	11.3	lipid metabolism.Phospholipid synthesis	Symbols: ATGPAT6, GPAT6 | GPAT6 (GLYCEROL-3-PHOSPHATE ACYLTRANSFERASE 6); 1-acylglycerol-3-phosphate O-acyltransferase/ acyltransferase | chr2:15952607-15955494 REVERSE
BnaC03g34280D	2.27064	11.3	lipid metabolism.Phospholipid synthesis	phospholipid/glycerol acyltransferase family protein | chr3:1595394-1598271 FORWARD
BnaC09g01080D	3.09366	11.3	lipid metabolism.Phospholipid synthesis	Symbols: ATGPAT6, GPAT6 | GPAT6 (GLYCEROL-3-PHOSPHATE ACYLTRANSFERASE 6); 1-acylglycerol-3-phosphate O-acyltransferase/ acyltransferase | chr2:15952607-15955494 REVERSE
BnaC05g04490D	3.48154	11.3	lipid metabolism.Phospholipid synthesis	Symbols: ATGPAT1, GPAT1 | GPAT1 (GLYCEROL-3-PHOSPHATE ACYLTRANSFERASE 1); 1-acylglycerol-3-phosphate O-acyltransferase/ acyltransferase | chr1:1993978-1996112 REVERSE
BnaA03g18520D	-1.87894	11.3	lipid metabolism.Phospholipid synthesis	Symbols: PGPS1, PGP1, PGS1 | PGP1 (PHOSPHATIDYLGLYCEROLPHOSPHATE SYNTHASE 1); CDP-alcohol phosphatidyltransferase/ CDP-diacylglycerol-glycerol-3-phosphate 3-phosphatidyltransferase | chr2:16407239-16409123 FORWARD
BnaA03g57310D	2.42518	11.3	lipid metabolism.Phospholipid synthesis	Symbols: ATGPAT3, GPAT3 | GPAT3 (GLYCEROL-3-PHOSPHATE ACYLTRANSFERASE 3); acyltransferase | chr4:844409-846787 REVERSE
BnaA04g26670D	-2.18246	11.3	lipid metabolism.Phospholipid synthesis	diacylglycerol kinase family protein | chr2:18950856-18953275 FORWARD
BnaA06g38300D	-1.78022	11.3	lipid metabolism.Phospholipid synthesis	phosphatidyl serine synthase family protein | chr1:5199018-5202175 FORWARD
BnaA07g07240D	-1.14964	11.3	lipid metabolism.Phospholipid synthesis	Symbols: PGPS1, PGP1, PGS1 | PGP1 (PHOSPHATIDYLGLYCEROLPHOSPHATE SYNTHASE 1); CDP-alcohol phosphatidyltransferase/ CDP-diacylglycerol-glycerol-3-phosphate 3-phosphatidyltransferase | chr2:16407239-16409123 FORWARD
BnaC04g04760D	-1.26387	11.3	lipid metabolism.Phospholipid synthesis	diacylglycerol kinase family protein | chr2:18950856-18953275 FORWARD
BnaC04g45690D	-7.86625	11.3	lipid metabolism.Phospholipid synthesis	Symbols: ATGPAT6, GPAT6 | GPAT6 (GLYCEROL-3-PHOSPHATE ACYLTRANSFERASE 6); 1-acylglycerol-3-phosphate O-acyltransferase/ acyltransferase | chr2:15952607-15955494 REVERSE
BnaC04g50730D	-1.24657	11.3	lipid metabolism.Phospholipid synthesis	diacylglycerol kinase family protein | chr2:18950856-18953275 FORWARD
BnaC05g11410D	-1.32909	11.3	lipid metabolism.Phospholipid synthesis	phosphatidyl serine synthase family protein | chr1:5199018-5202175 FORWARD
BnaC08g39040D	-1.01972	11.3	lipid metabolism.Phospholipid synthesis	phosphatidyl serine synthase family protein | chr1:5199018-5202175 FORWARD
BnaCnng08770D	-1.05057	11.3	lipid metabolism.Phospholipid synthesis	Symbols: ATGPAT4, GPAT4 | GPAT4 (GLYCEROL-3-PHOSPHATE ACYLTRANSFERASE 4); 1-acylglycerol-3-phosphate O-acyltransferase/ acyltransferase | chr1:221691-224340 REVERSE
BnaCnng74890D	-2.00488	11.3	lipid metabolism.Phospholipid synthesis	Symbols: ATGPAT4, GPAT4 | GPAT4 (GLYCEROL-3-PHOSPHATE ACYLTRANSFERASE 4); 1-acylglycerol-3-phosphate O-acyltransferase/ acyltransferase | chr1:221691-224340 REVERSE
BnaA03g40390D	4.15843	11.4	lipid metabolism.TAG synthesis	INVOLVED IN: lipid storage; LOCATED IN: monolayer-surrounded lipid storage body, endomembrane system, integral to membrane, membrane; CONTAINS InterPro DOMAIN/s: Oleosin (InterPro:IPR000136); Has 6250 Blast hits to 2851 proteins in 405 species: Archae - 6; Bacteria - 1198; Metazoa - 1427; Fungi - 369; Plants - 513; Viruses - 103; Other Eukaryotes - 2634 (source: NCBI BLink). | chr5:24770099-24771…
BnaA01g19350D	-2.73565	11.6	lipid metabolism.lipid transfer proteins etc	Symbols: LTP5 | LTP5 (Lipid transfer protein 5); lipid transporter | chr3:19138394-19139252 REVERSE
BnaA03g09540D	-3.07158	11.6	lipid metabolism.lipid transfer proteins etc	Symbols: LTP3 | LTP3 (LIPID TRANSFER PROTEIN 3); lipid binding | chr5:23928971-23929745 FORWARD
BnaA03g31060D	-2.87504	11.6	lipid metabolism.lipid transfer proteins etc	Symbols: LTP6 | LTP6; lipid binding | chr3:2664139-2664828 REVERSE
BnaA04g19520D	-1.61318	11.6	lipid metabolism.lipid transfer proteins etc	Symbols: GLTP1 | GLTP1 (glycolipid transfer protein 1); glycolipid binding / glycolipid transporter | chr2:14176363-14178651 REVERSE
BnaA04g22080D	-1.78357	11.6	lipid metabolism.lipid transfer proteins etc	Symbols: LP1, LTP1, ATLTP1 | LP1; calmodulin binding | chr2:16130350-16131174 FORWARD
BnaA09g18770D	-2.01887	11.6	lipid metabolism.lipid transfer proteins etc	Symbols: CP5 | CP5 | chr1:24046553-24048622 REVERSE
BnaC01g23300D	-4.02224	11.6	lipid metabolism.lipid transfer proteins etc	Symbols: LTP5 | LTP5 (Lipid transfer protein 5); lipid transporter | chr3:19138394-19139252 REVERSE
BnaC03g36390D	-2.61	11.6	lipid metabolism.lipid transfer proteins etc	Symbols: LTP6 | LTP6; lipid binding | chr3:2664139-2664828 REVERSE
BnaC04g43910D	-1.56232	11.6	lipid metabolism.lipid transfer proteins etc	Symbols: GLTP1 | GLTP1 (glycolipid transfer protein 1); glycolipid binding / glycolipid transporter | chr2:14176363-14178651 REVERSE
BnaC04g45800D	-2.118	11.6	lipid metabolism.lipid transfer proteins etc	Symbols: LP1, LTP1, ATLTP1 | LP1; calmodulin binding | chr2:16130350-16131174 FORWARD
BnaC09g20830D	-1.52351	11.6	lipid metabolism.lipid transfer proteins etc	Symbols: CP5 | CP5 | chr1:24046553-24048622 REVERSE
BnaCnng36210D	1.13125	11.6	lipid metabolism.lipid transfer proteins etc	Symbols: LTPG1 | LTPG1 (GLYCOSYLPHOSPHATIDYLINOSITOL-ANCHORED LIPID PROTEIN TRANSFER 1) | chr1:9740704-9742159 FORWARD
BnaC03g58190D	1.81767	11.6	lipid metabolism.lipid transfer proteins etc	Symbols: LTPG1 | LTPG1 (GLYCOSYLPHOSPHATIDYLINOSITOL-ANCHORED LIPID PROTEIN TRANSFER 1) | chr1:9740704-9742159 FORWARD
BnaA08g18690D	2.04244	11.6	lipid metabolism.lipid transfer proteins etc	Symbols: LTPG1 | LTPG1 (GLYCOSYLPHOSPHATIDYLINOSITOL-ANCHORED LIPID PROTEIN TRANSFER 1) | chr1:9740704-9742159 FORWARD
BnaC07g11810D	2.74461	11.6	lipid metabolism.lipid transfer proteins etc	Symbols: LTPG1 | LTPG1 (GLYCOSYLPHOSPHATIDYLINOSITOL-ANCHORED LIPID PROTEIN TRANSFER 1) | chr1:9740704-9742159 FORWARD
BnaA07g08700D	4.14868	11.6	lipid metabolism.lipid transfer proteins etc	Symbols: LTPG1 | LTPG1 (GLYCOSYLPHOSPHATIDYLINOSITOL-ANCHORED LIPID PROTEIN TRANSFER 1) | chr1:9740704-9742159 FORWARD
BnaA07g08720D	7.32828	11.6	lipid metabolism.lipid transfer proteins etc	Symbols: LTPG1 | LTPG1 (GLYCOSYLPHOSPHATIDYLINOSITOL-ANCHORED LIPID PROTEIN TRANSFER 1) | chr1:9740704-9742159 FORWARD
BnaA05g19740D	-1.28473	11.6	lipid metabolism.lipid transfer proteins etc	glycolipid transfer protein-related | chr3:7464020-7465785 REVERSE
BnaAnng27610D	-1.10271	11.6	lipid metabolism.lipid transfer proteins etc	Symbols: LTP2, LP2 | LTP2 (LIPID TRANSFER PROTEIN 2); lipid binding | chr2:16128378-16129158 FORWARD
BnaC03g71570D	-5.30114	11.6	lipid metabolism.lipid transfer proteins etc	Symbols: LTP3 | LTP3 (LIPID TRANSFER PROTEIN 3); lipid binding | chr5:23928971-23929745 FORWARD
BnaC04g53090D	-1.61917	11.6	lipid metabolism.lipid transfer proteins etc	lipid transfer protein-related | chr2:18307309-18308349 REVERSE
BnaC06g04810D	-1.94357	11.6	lipid metabolism.lipid transfer proteins etc	Symbols: GLTP1 | GLTP1 (glycolipid transfer protein 1); glycolipid binding / glycolipid transporter | chr2:14176363-14178651 REVERSE
BnaA02g27270D	-5.06737	11.8	lipid metabolism.'exotics'(steroids, squalene etc)	sulfotransferase family protein | chr2:1147807-1149061 REVERSE
BnaA06g37980D	-1.75221	11.8	lipid metabolism.'exotics'(steroids, squalene etc)	Symbols: ERG28 | ERG28 (Arabidopsis homolog of yeast ergosterol28) | chr1:3273825-3275837 FORWARD
BnaA07g32390D	-1.84877	11.8	lipid metabolism.'exotics'(steroids, squalene etc)	Symbols: ECH2, ATECH2 | maoC-like dehydratase domain-containing protein | chr1:28574740-28577700 REVERSE
BnaA10g08330D	-2.3781	11.8	lipid metabolism.'exotics'(steroids, squalene etc)	quinone reductase family protein | chr4:13661331-13663294 REVERSE
BnaAnng18230D	-1.26048	11.8	lipid metabolism.'exotics'(steroids, squalene etc)	quinone reductase family protein | chr4:17324571-17326457 FORWARD
BnaC03g02410D	-3.38633	11.8	lipid metabolism.'exotics'(steroids, squalene etc)	sulfotransferase family protein | chr5:17546173-17547434 FORWARD
BnaC03g56620D	-7.75933	11.8	lipid metabolism.'exotics'(steroids, squalene etc)	sulfotransferase family protein | chr5:17546173-17547434 FORWARD
BnaC05g07790D	-2.50106	11.8	lipid metabolism.'exotics'(steroids, squalene etc)	Symbols: ERG28 | ERG28 (Arabidopsis homolog of yeast ergosterol28) | chr1:3273825-3275837 FORWARD
BnaC06g36850D	-1.90814	11.8	lipid metabolism.'exotics'(steroids, squalene etc)	Symbols: ECH2, ATECH2 | maoC-like dehydratase domain-containing protein | chr1:28574740-28577700 REVERSE
BnaC07g46240D	-1.04759	11.8	lipid metabolism.'exotics'(steroids, squalene etc)	quinone reductase family protein | chr4:17324571-17326457 FORWARD
BnaC09g16260D	-1.16993	11.8	lipid metabolism.'exotics'(steroids, squalene etc)	sulfotransferase family protein | chr2:1147807-1149061 REVERSE
BnaC09g17220D	-1.69048	11.8	lipid metabolism.'exotics'(steroids, squalene etc)	Symbols: ATSCP2, SCP2 | SCP2 (STEROL CARRIER PROTEIN 2); oxidoreductase/ sterol carrier | chr5:17194197-17196032 REVERSE
BnaCnng38420D	-2.05972	11.8	lipid metabolism.'exotics'(steroids, squalene etc)	quinone reductase family protein | chr4:13661331-13663294 REVERSE
BnaAnng01940D	1.32481	11.8	lipid metabolism.'exotics'(steroids, squalene etc)	Symbols: ATST2A, ST2A | ST2A (SULFOTRANSFERASE 2A); hydroxyjasmonate sulfotransferase/ sulfotransferase | chr5:2174678-2176106 REVERSE
BnaA09g15810D	2.59357	11.8	lipid metabolism.'exotics'(steroids, squalene etc)	sulfotransferase family protein | chr2:1147807-1149061 REVERSE
BnaC09g48180D	3.13658	11.8	lipid metabolism.'exotics'(steroids, squalene etc)	Symbols: ATST2A, ST2A | ST2A (SULFOTRANSFERASE 2A); hydroxyjasmonate sulfotransferase/ sulfotransferase | chr5:2174678-2176106 REVERSE
BnaC02g01760D	3.69524	11.8	lipid metabolism.'exotics'(steroids, squalene etc)	Symbols: ATST2A, ST2A | ST2A (SULFOTRANSFERASE 2A); hydroxyjasmonate sulfotransferase/ sulfotransferase | chr5:2174678-2176106 REVERSE
BnaA03g55570D	4.08377	11.8	lipid metabolism.'exotics'(steroids, squalene etc)	Symbols: ATST2A, ST2A | ST2A (SULFOTRANSFERASE 2A); hydroxyjasmonate sulfotransferase/ sulfotransferase | chr5:2174678-2176106 REVERSE
BnaAnng33290D	7.37069	11.8	lipid metabolism.'exotics'(steroids, squalene etc)	Symbols: ATST2A, ST2A | ST2A (SULFOTRANSFERASE 2A); hydroxyjasmonate sulfotransferase/ sulfotransferase | chr5:2174678-2176106 REVERSE
BnaA02g09580D	1.08736	11.8	lipid metabolism.'exotics'(steroids, squalene etc)	quinone reductase family protein | chr4:13661331-13663294 REVERSE
BnaA03g11850D	-1.7531	11.8	lipid metabolism.'exotics'(steroids, squalene etc)	quinone reductase family protein | chr4:13661331-13663294 REVERSE
BnaA08g31560D	-8.91687	11.8	lipid metabolism.'exotics'(steroids, squalene etc)	sulfotransferase family protein | chr5:17546173-17547434 FORWARD
BnaC02g10510D	-1.20662	11.8	lipid metabolism.'exotics'(steroids, squalene etc)	quinone reductase family protein | chr5:23745891-23747274 REVERSE
BnaC03g14590D	-1.23117	11.8	lipid metabolism.'exotics'(steroids, squalene etc)	quinone reductase family protein | chr4:13661331-13663294 REVERSE
BnaC03g56600D	-2.94996	11.8	lipid metabolism.'exotics'(steroids, squalene etc)	sulfotransferase family protein | chr5:17546173-17547434 FORWARD
BnaC06g15020D	-3.74723	11.8	lipid metabolism.'exotics'(steroids, squalene etc)	sulfotransferase family protein | chr5:17546173-17547434 FORWARD
BnaC03g43300D	-2.94676	11.9	lipid metabolism.lipid degradation	alcohol oxidase-related | chr3:8382805-8386148 FORWARD
BnaA07g06540D	1.18028	11.9	lipid metabolism.lipid degradation	alcohol oxidase-related | chr3:8382805-8386148 FORWARD
BnaA07g06550D	1.24344	11.9	lipid metabolism.lipid degradation	alcohol oxidase-related | chr3:8382805-8386148 FORWARD
BnaA06g02770D	-2.06465	12.4	N-metabolism.misc	nitroreductase family protein | chr1:352637-354969 REVERSE
BnaA07g10840D	-1.11859	12.4	N-metabolism.misc	Symbols: UREF | UREF (urease accessory protein F); nickel ion binding | chr1:7666460-7667758 FORWARD
BnaC09g07390D	-1.58496	12.4	N-metabolism.misc	nitrogen regulation family protein | chr5:26820121-26821964 REVERSE
BnaA06g21190D	-2.98555	12.4	N-metabolism.misc	unknown protein | chr3:18403002-18404788 REVERSE
BnaA09g07510D	-1.49233	12.4	N-metabolism.misc	nitrogen regulation family protein | chr5:26820121-26821964 REVERSE
BnaC03g52330D	-2.54226	12.4	N-metabolism.misc	unknown protein | chr3:18403002-18404788 REVERSE
BnaC06g03680D	-1.99028	12.4	N-metabolism.misc	nitroreductase family protein | chr1:352637-354969 REVERSE
BnaC07g16130D	-1.29751	12.4	N-metabolism.misc	nitrogen regulation family protein | chr5:26820121-26821964 REVERSE
BnaA06g27610D	-3.10901	13	amino acid metabolism	ACT domain-containing protein | chr5:8787403-8789530 REVERSE
BnaC02g02600D	-5.55663	13	amino acid metabolism	ACT domain-containing protein | chr5:1368542-1371480 REVERSE
BnaC07g29440D	-3.44876	13	amino acid metabolism	ACT domain-containing protein | chr5:8787403-8789530 REVERSE
BnaA03g01400D	-1.21004	13	amino acid metabolism	ACT domain-containing protein | chr5:1368542-1371480 REVERSE
BnaA10g25540D	-1.41283	13	amino acid metabolism	ACT domain-containing protein | chr5:1368542-1371480 REVERSE
BnaA02g35780D	-1.1678	13.99	amino acid metabolism.misc	Symbols: ACR4 | ACR4 (ACT REPEAT 4); amino acid binding | chr1:25957819-25960307 FORWARD
BnaA07g21080D	-2.44633	13.99	amino acid metabolism.misc	Symbols: ACR3 | ACR3; amino acid binding | chr1:28932162-28935539 FORWARD
BnaC02g18910D	-1.63973	13.99	amino acid metabolism.misc	Symbols: ACR4 | ACR4 (ACT REPEAT 4); amino acid binding | chr1:25957819-25960307 FORWARD
BnaC06g21200D	-1.57565	13.99	amino acid metabolism.misc	Symbols: ACR3 | ACR3; amino acid binding | chr1:28932162-28935539 FORWARD
BnaA07g27660D	2.28479	13.99	amino acid metabolism.misc	Symbols: ACR4 | ACR4 (ACT REPEAT 4); amino acid binding | chr1:25957819-25960307 FORWARD
BnaC05g09410D	2.29571	13.99	amino acid metabolism.misc	Symbols: ACR8 | ACR8; amino acid binding | chr1:4226362-4229138 REVERSE
BnaA06g08160D	2.41213	13.99	amino acid metabolism.misc	Symbols: ACR8 | ACR8; amino acid binding | chr1:4226362-4229138 REVERSE
BnaA02g27260D	-3.0179	13.99	amino acid metabolism.misc	Symbols: ACR5 | ACR5; amino acid binding | chr2:1137635-1140186 REVERSE
BnaC02g35120D	-1.94271	13.99	amino acid metabolism.misc	Symbols: ACR5 | ACR5; amino acid binding | chr2:1137635-1140186 REVERSE
BnaC06g37790D	-2.31901	13.99	amino acid metabolism.misc	Symbols: ACR3 | ACR3; amino acid binding | chr1:28932162-28935539 FORWARD
BnaCnng26130D	-1.27104	13.99	amino acid metabolism.misc	Symbols: ATMTK | ATMTK (ARABIDOPSIS THALIANA S-METHYL-5-THIORIBOSE KINASE); S-methyl-5-thioribose kinase | chr1:18442882-18445098 FORWARD
BnaA01g19120D	-1.59726	14.1	S-assimilation.ATPS	Symbols: APS3 | APS3; sulfate adenylyltransferase (ATP) | chr4:8413288-8415391 REVERSE
BnaA06g36560D	-1.71887	14.1	S-assimilation.ATPS	Symbols: APS4 | APS4; sulfate adenylyltransferase (ATP) | chr5:17589394-17591535 REVERSE
BnaC01g22950D	-2.15729	14.1	S-assimilation.ATPS	Symbols: APS3 | APS3; sulfate adenylyltransferase (ATP) | chr4:8413288-8415391 REVERSE
BnaC07g17320D	-1.8212	14.1	S-assimilation.ATPS	Symbols: APS4 | APS4; sulfate adenylyltransferase (ATP) | chr5:17589394-17591535 REVERSE
BnaA06g14140D	1.57272	14.1	S-assimilation.ATPS	Symbols: APS2, ASA1 | APS2; sulfate adenylyltransferase (ATP) | chr1:6914613-6916805 REVERSE
BnaA01g34620D	-4.40599	14.15	S-assimilation.AKN	Symbols: AKN2 | AKN2 (APS-kinase 2); ATP binding / adenylylsulfate kinase/ kinase/ transferase, transferring phosphorus-containing groups | chr4:18519717-18521568 FORWARD
BnaA03g54400D	-1.99289	14.15	S-assimilation.AKN	Symbols: AKN2 | AKN2 (APS-kinase 2); ATP binding / adenylylsulfate kinase/ kinase/ transferase, transferring phosphorus-containing groups | chr4:18519717-18521568 FORWARD
BnaA06g25000D	-1.60629	14.15	S-assimilation.AKN	adenylylsulfate kinase, putative | chr5:26939159-26941010 FORWARD
BnaC01g00790D	-5.47999	14.15	S-assimilation.AKN	Symbols: AKN2 | AKN2 (APS-kinase 2); ATP binding / adenylylsulfate kinase/ kinase/ transferase, transferring phosphorus-containing groups | chr4:18519717-18521568 FORWARD
BnaC07g51290D	-2.49708	14.15	S-assimilation.AKN	Symbols: AKN2 | AKN2 (APS-kinase 2); ATP binding / adenylylsulfate kinase/ kinase/ transferase, transferring phosphorus-containing groups | chr4:18519717-18521568 FORWARD
BnaA03g38670D	-1.90398	14.15	S-assimilation.AKN	Symbols: APK, AKN1, ATAKN1 | APK (APS KINASE); ATP binding / adenylylsulfate kinase/ kinase/ transferase, transferring phosphorus-containing groups | chr2:6314032-6315766 FORWARD
BnaA08g16110D	-1.70044	14.15	S-assimilation.AKN	Symbols: AKN2 | AKN2 (APS-kinase 2); ATP binding / adenylylsulfate kinase/ kinase/ transferase, transferring phosphorus-containing groups | chr4:18519717-18521568 FORWARD
BnaA09g08410D	-1.51592	14.15	S-assimilation.AKN	Symbols: APK, AKN1, ATAKN1 | APK (APS KINASE); ATP binding / adenylylsulfate kinase/ kinase/ transferase, transferring phosphorus-containing groups | chr2:6314032-6315766 FORWARD
BnaC09g08710D	-1.39232	14.15	S-assimilation.AKN	Symbols: APK, AKN1, ATAKN1 | APK (APS KINASE); ATP binding / adenylylsulfate kinase/ kinase/ transferase, transferring phosphorus-containing groups | chr2:6314032-6315766 FORWARD
BnaCnng47170D	-1.96064	14.15	S-assimilation.AKN	Symbols: APK, AKN1, ATAKN1 | APK (APS KINASE); ATP binding / adenylylsulfate kinase/ kinase/ transferase, transferring phosphorus-containing groups | chr2:6314032-6315766 FORWARD
BnaA09g20370D	-1.22686	14.2	S-assimilation.APR	Symbols: APR1, APR, PRH19, ATAPR1 | APR1 (APS REDUCTASE 1); adenylyl-sulfate reductase | chr4:2325003-2327013 FORWARD
BnaA01g11840D	-1.12061	14.2	S-assimilation.APR	Symbols: APR3, PRH-26, PRH26, ATAPR3 | APR3 (APS REDUCTASE 3); adenylyl-sulfate reductase | chr4:11657008-11659105 REVERSE
BnaA03g31290D	-1.05463	14.3	S-assimilation.sulfite redox	Symbols: SIR | SIR; sulfite reductase (ferredoxin)/ sulfite reductase | chr5:1319356-1322526 FORWARD
BnaA10g25620D	-2.16293	14.3	S-assimilation.sulfite redox	Symbols: SIR | SIR; sulfite reductase (ferredoxin)/ sulfite reductase | chr5:1319356-1322526 FORWARD
BnaAnng23390D	-1.81685	14.3	S-assimilation.sulfite redox	Symbols: SIR | SIR; sulfite reductase (ferredoxin)/ sulfite reductase | chr5:1319356-1322526 FORWARD
BnaC03g36650D	-1.28955	14.3	S-assimilation.sulfite redox	Symbols: SIR | SIR; sulfite reductase (ferredoxin)/ sulfite reductase | chr5:1319356-1322526 FORWARD
BnaA01g31570D	-1.04256	14.3	S-assimilation.sulfite redox	Symbols: SIR | SIR; sulfite reductase (ferredoxin)/ sulfite reductase | chr5:1319356-1322526 FORWARD
BnaC09g50680D	-1.68739	14.3	S-assimilation.sulfite redox	Symbols: SIR | SIR; sulfite reductase (ferredoxin)/ sulfite reductase | chr5:1319356-1322526 FORWARD
BnaA06g10080D	-2.21853	14.5	S-assimilation.sulfite oxidase	Symbols: SOX, AT-SO, AtSO | SOX (SULFITE OXIDASE); sulfite oxidase | chr3:314694-317431 REVERSE
BnaC05g11700D	-1.86726	14.5	S-assimilation.sulfite oxidase	Symbols: SOX, AT-SO, AtSO | SOX (SULFITE OXIDASE); sulfite oxidase | chr3:314694-317431 REVERSE
BnaA07g06240D	-7.22882	15	metal handling	Symbols: SBP3 | SBP3 (selenium-binding protein 3); selenium binding | chr3:8581654-8583835 FORWARD
BnaA08g07580D	-1.77407	15	metal handling	Symbols: EDA38, SBP2 | SBP2 (SELENIUM-BINDING PROTEIN 2); selenium binding | chr4:8100349-8102875 REVERSE
BnaAnng17380D	-1.01463	15	metal handling	selenoprotein-related | chr5:23697841-23699767 FORWARD
BnaC08g08320D	-2.89681	15	metal handling	Symbols: EDA38, SBP2 | SBP2 (SELENIUM-BINDING PROTEIN 2); selenium binding | chr4:8100349-8102875 REVERSE
BnaCnng34030D	-3.29707	15	metal handling	Symbols: ATAILP1, AILP1 | AILP1 | chr5:6423269-6426166 FORWARD
BnaCnng34110D	-2.35261	15	metal handling	Symbols: ATAILP1, AILP1 | AILP1 | chr5:6423269-6426166 FORWARD
BnaA03g07490D	-2.29952	15	metal handling	Symbols: ATAILP1, AILP1 | AILP1 | chr5:6423269-6426166 FORWARD
BnaA10g15900D	-2.16568	15	metal handling	Symbols: ATAILP1, AILP1 | AILP1 | chr5:6423269-6426166 FORWARD
BnaC02g08540D	-1.8569	15	metal handling	Symbols: ATAILP1, AILP1 | AILP1 | chr5:6423269-6426166 FORWARD
BnaC09g33940D	-1.05286	15	metal handling	selenoprotein-related | chr5:23697841-23699767 FORWARD
BnaC09g38450D	-1.86504	15	metal handling	Symbols: ATAILP1, AILP1 | AILP1 | chr5:6423269-6426166 FORWARD
BnaA09g24640D	-4.50158	15.1	metal handling.acquisition	Symbols: ATFRO8, FRO8 | FRO8 (FERRIC REDUCTION OXIDASE 8); ferric-chelate reductase/ oxidoreductase | chr5:20415771-20418742 FORWARD
BnaA10g00390D	-2.63631	15.1	metal handling.acquisition	Symbols: FRO2, FRD1, ATFRO2 | FRO2 (FERRIC REDUCTION OXIDASE 2); ferric-chelate reductase | chr1:209395-213041 FORWARD
BnaC05g24230D	-2.71769	15.1	metal handling.acquisition	Symbols: ATFRO8, FRO8 | FRO8 (FERRIC REDUCTION OXIDASE 8); ferric-chelate reductase/ oxidoreductase | chr5:20415771-20418742 FORWARD
BnaC09g26410D	-1.46821	15.1	metal handling.acquisition	Symbols: ATFRO7, FRO7 | ATFRO7 (FERRIC REDUCTION OXIDASE 7); ferric-chelate reductase/ oxidoreductase | chr5:20205342-20208730 REVERSE
BnaCnng08750D	-2.33515	15.1	metal handling.acquisition	Symbols: FRO1, ATFRO1 | FRO1 (FERRIC REDUCTION OXIDASE 1); ferric-chelate reductase | chr1:214229-217304 FORWARD
BnaCnng65560D	-3.52774	15.1	metal handling.acquisition	Symbols: FRO2, FRD1, ATFRO2 | FRO2 (FERRIC REDUCTION OXIDASE 2); ferric-chelate reductase | chr1:209395-213041 FORWARD
BnaAnng20940D	-1.61708	15.1	metal handling.acquisition	Symbols: ATFRO7, FRO7 | ATFRO7 (FERRIC REDUCTION OXIDASE 7); ferric-chelate reductase/ oxidoreductase | chr5:20205342-20208730 REVERSE
BnaA03g13550D	-2.49876	15.2	metal handling.binding, chelation and storage	metal ion binding | chr5:20635866-20637977 REVERSE
BnaA05g28250D	-1.32366	15.2	metal handling.binding, chelation and storage	Symbols: ATX1, ATATX1 | ATX1 (ARABIDOPSIS HOMOLOG OF ANTI-OXIDANT 1); metal ion binding | chr1:24686256-24687332 REVERSE
BnaA06g00050D	-2.40482	15.2	metal handling.binding, chelation and storage	Symbols: ATSERAT2;1, SAT5, SAT1 | ATSERAT2;1 (SERINE ACETYLTRANSFERASE 2;1); serine O-acetyltransferase | chr1:20912116-20913447 FORWARD
BnaA09g15520D	-3.8679	15.2	metal handling.binding, chelation and storage	copper chaperone (CCH)-related | chr1:21035618-21037211 FORWARD
BnaC02g41180D	-2.47079	15.2	metal handling.binding, chelation and storage	copper-binding family protein | chr5:8410258-8412240 REVERSE
BnaC03g16450D	-3.16152	15.2	metal handling.binding, chelation and storage	metal ion binding | chr5:20635866-20637977 REVERSE
BnaC03g70970D	-3.35804	15.2	metal handling.binding, chelation and storage	Symbols: ATSERAT2;1, SAT5, SAT1 | ATSERAT2;1 (SERINE ACETYLTRANSFERASE 2;1); serine O-acetyltransferase | chr1:20912116-20913447 FORWARD
BnaCnng25440D	-3.68281	15.2	metal handling.binding, chelation and storage	Symbols: ATSERAT2;1, SAT5, SAT1 | ATSERAT2;1 (SERINE ACETYLTRANSFERASE 2;1); serine O-acetyltransferase | chr1:20912116-20913447 FORWARD
BnaA07g29100D	1.0933	15.2	metal handling.binding, chelation and storage	heavy-metal-associated domain-containing protein / copper chaperone (CCH)-related | chr1:26803153-26804292 REVERSE
BnaC06g15730D	1.30528	15.2	metal handling.binding, chelation and storage	Symbols: ATFER3 | ATFER3 (ferritin 3); binding / ferric iron binding / oxidoreductase/ transition metal ion binding | chr3:20814047-20816035 REVERSE
BnaC09g47300D	1.49369	15.2	metal handling.binding, chelation and storage	IBR domain-containing protein | chr5:2845824-2847415 REVERSE
BnaA07g15730D	1.51396	15.2	metal handling.binding, chelation and storage	metal ion binding | chr2:7920508-7922326 REVERSE
BnaC04g08360D	1.54686	15.2	metal handling.binding, chelation and storage	Symbols: MAT3 | MAT3 (methionine adenosyltransferase 3); copper ion binding / methionine adenosyltransferase | chr2:15479366-15481412 REVERSE
BnaA05g07530D	1.58978	15.2	metal handling.binding, chelation and storage	Symbols: MAT3 | MAT3 (methionine adenosyltransferase 3); copper ion binding / methionine adenosyltransferase | chr2:15479366-15481412 REVERSE
BnaA06g40860D	1.59597	15.2	metal handling.binding, chelation and storage	Symbols: ATFP6, HIPP26 | ATFP6 (FARNESYLATED PROTEIN 6); metal ion binding | chr4:18034431-18035889 FORWARD
BnaC05g43490D	1.78295	15.2	metal handling.binding, chelation and storage	Symbols: MT2A, ATMT-K, ATMT-1 | MT2A (METALLOTHIONEIN 2A); copper ion binding | chr3:2889486-2890229 REVERSE
BnaC03g00160D	1.9036	15.2	metal handling.binding, chelation and storage	Symbols: ATFER1, FER1 | ATFER1; ferric iron binding / iron ion binding | chr5:227953-230051 REVERSE
BnaA03g34510D	2.15252	15.2	metal handling.binding, chelation and storage	Symbols: MTO3, SAMS3, MAT4 | MTO3 (METHIONINE OVER-ACCUMULATOR 3); methionine adenosyltransferase | chr3:5952187-5954084 REVERSE
BnaCnng16700D	2.25792	15.2	metal handling.binding, chelation and storage	Symbols: MTO3, SAMS3, MAT4 | MTO3 (METHIONINE OVER-ACCUMULATOR 3); methionine adenosyltransferase | chr3:5952187-5954084 REVERSE
BnaA08g17020D	3.11074	15.2	metal handling.binding, chelation and storage	Symbols: ATFP6, HIPP26 | ATFP6 (FARNESYLATED PROTEIN 6); metal ion binding | chr4:18034431-18035889 FORWARD
BnaC03g39970D	3.2398	15.2	metal handling.binding, chelation and storage	Symbols: MTO3, SAMS3, MAT4 | MTO3 (METHIONINE OVER-ACCUMULATOR 3); methionine adenosyltransferase | chr3:5952187-5954084 REVERSE
BnaA01g36920D	4.18935	15.2	metal handling.binding, chelation and storage	Symbols: MTO3, SAMS3, MAT4 | MTO3 (METHIONINE OVER-ACCUMULATOR 3); methionine adenosyltransferase | chr3:5952187-5954084 REVERSE
BnaC03g60050D	4.31292	15.2	metal handling.binding, chelation and storage	Symbols: ATFP6, HIPP26 | ATFP6 (FARNESYLATED PROTEIN 6); metal ion binding | chr4:18034431-18035889 FORWARD
BnaC07g47700D	9.22665	15.2	metal handling.binding, chelation and storage	Symbols: ATFP6, HIPP26 | ATFP6 (FARNESYLATED PROTEIN 6); metal ion binding | chr4:18034431-18035889 FORWARD
BnaC02g01010D	10.6287	15.2	metal handling.binding, chelation and storage	IBR domain-containing protein | chr5:2845824-2847415 REVERSE
BnaA01g28840D	3.60881	15.2	metal handling.binding, chelation and storage	Symbols: ATCOX17, COX17 | ATCOX17; copper chaperone | chr3:5179413-5180665 FORWARD
BnaA02g03610D	-2.09226	15.2	metal handling.binding, chelation and storage	heavy-metal-associated domain-containing protein / copper chaperone (CCH)-related | chr5:5755322-5756888 FORWARD
BnaA02g33770D	-2.64836	15.2	metal handling.binding, chelation and storage	Symbols: ATFP3, FP3 | ATFP3; metal ion binding / transition metal ion binding | chr5:25433154-25435834 FORWARD
BnaA04g16590D	-1.33417	15.2	metal handling.binding, chelation and storage	copper-binding family protein | chr2:12295327-12297117 FORWARD
BnaA05g29010D	1.574	15.2	metal handling.binding, chelation and storage	Symbols: MT2A, ATMT-K, ATMT-1 | MT2A (METALLOTHIONEIN 2A); copper ion binding | chr3:2889486-2890229 REVERSE
BnaA06g39330D	-1.63649	15.2	metal handling.binding, chelation and storage	copper-binding family protein | chr5:8410258-8412240 REVERSE
BnaA07g16800D	-1.14219	15.2	metal handling.binding, chelation and storage	Symbols: CCH | CCH (COPPER CHAPERONE); copper chaperone | chr3:20863257-20864544 REVERSE
BnaA08g00140D	-1.87226	15.2	metal handling.binding, chelation and storage	Symbols: ATSERAT2;1, SAT5, SAT1 | ATSERAT2;1 (SERINE ACETYLTRANSFERASE 2;1); serine O-acetyltransferase | chr1:20912116-20913447 FORWARD
BnaA09g06630D	-1.53894	15.2	metal handling.binding, chelation and storage	Symbols: ATFP3, FP3 | ATFP3; metal ion binding / transition metal ion binding | chr5:25433154-25435834 FORWARD
BnaA09g15990D	-1.43558	15.2	metal handling.binding, chelation and storage	Symbols: ATNAS4, NAS4 | NAS4 (NICOTIANAMINE SYNTHASE 4); nicotianamine synthase | chr1:21136944-21138087 FORWARD
BnaA09g49970D	8.2127	15.2	metal handling.binding, chelation and storage	copper-binding family protein | chr1:1931671-1932266 REVERSE
BnaA10g22750D	1.93198	15.2	metal handling.binding, chelation and storage	IBR domain-containing protein | chr5:2845824-2847415 REVERSE
BnaAnng05970D	9.79766	15.2	metal handling.binding, chelation and storage	IBR domain-containing protein | chr5:2845824-2847415 REVERSE
BnaAnng11680D	-1.19635	15.2	metal handling.binding, chelation and storage	heavy-metal-associated domain-containing protein / copper chaperone (CCH)-related | chr4:16685720-16686703 REVERSE
BnaAnng38060D	-3.03953	15.2	metal handling.binding, chelation and storage	Symbols: ATFER3 | ATFER3 (ferritin 3); binding / ferric iron binding / oxidoreductase/ transition metal ion binding | chr3:20814047-20816035 REVERSE
BnaC02g02620D	-1.36896	15.2	metal handling.binding, chelation and storage	Symbols: ATX1, ATATX1 | ATX1 (ARABIDOPSIS HOMOLOG OF ANTI-OXIDANT 1); metal ion binding | chr1:24686256-24687332 REVERSE
BnaC02g42560D	-1.88547	15.2	metal handling.binding, chelation and storage	Symbols: ATFP3, FP3 | ATFP3; metal ion binding / transition metal ion binding | chr5:25433154-25435834 FORWARD
BnaC04g07920D	-2.50457	15.2	metal handling.binding, chelation and storage	heavy-metal-associated domain-containing protein | chr2:15694215-15695825 FORWARD
BnaC04g10980D	-1.58133	15.2	metal handling.binding, chelation and storage	Symbols: ATSERAT2;1, SAT5, SAT1 | ATSERAT2;1 (SERINE ACETYLTRANSFERASE 2;1); serine O-acetyltransferase | chr1:20912116-20913447 FORWARD
BnaC04g39910D	-2.47409	15.2	metal handling.binding, chelation and storage	copper-binding family protein | chr2:12295327-12297117 FORWARD
BnaC05g08920D	-2.74496	15.2	metal handling.binding, chelation and storage	copper-binding family protein | chr3:7573065-7573669 FORWARD
BnaC05g42430D	-1.09668	15.2	metal handling.binding, chelation and storage	Symbols: ATX1, ATATX1 | ATX1 (ARABIDOPSIS HOMOLOG OF ANTI-OXIDANT 1); metal ion binding | chr1:24686256-24687332 REVERSE
BnaC06g11170D	-3.3422	15.2	metal handling.binding, chelation and storage	Symbols: ATSERAT2;1, SAT5, SAT1 | ATSERAT2;1 (SERINE ACETYLTRANSFERASE 2;1); serine O-acetyltransferase | chr1:20912116-20913447 FORWARD
BnaC09g51520D	-3	15.2	metal handling.binding, chelation and storage	copper chaperone (CCH)-related | chr1:21035618-21037211 FORWARD
BnaA04g15380D	-1.83355	16.1	secondary metabolism.isoprenoids	Symbols: FDH, KCS10 | KCS10 (3-KETOACYL-COA SYNTHASE 10); acyltransferase/ catalytic/ transferase, transferring acyl groups other than amino-acyl groups | chr2:11170418-11173142 REVERSE
BnaA05g27140D	-1.94555	16.1	secondary metabolism.isoprenoids	prenyltransferase/ zinc ion binding | chr3:3783111-3785660 REVERSE
BnaA09g40640D	-1.23329	16.1	secondary metabolism.isoprenoids	Symbols: FDH, KCS10 | KCS10 (3-KETOACYL-COA SYNTHASE 10); acyltransferase/ catalytic/ transferase, transferring acyl groups other than amino-acyl groups | chr2:11170418-11173142 REVERSE
BnaC04g38330D	-1.76597	16.1	secondary metabolism.isoprenoids	Symbols: FDH, KCS10 | KCS10 (3-KETOACYL-COA SYNTHASE 10); acyltransferase/ catalytic/ transferase, transferring acyl groups other than amino-acyl groups | chr2:11170418-11173142 REVERSE
BnaC05g41270D	-1.03484	16.1	secondary metabolism.isoprenoids	prenyltransferase/ zinc ion binding | chr3:3783111-3785660 REVERSE
BnaC08g33100D	-1.36309	16.1	secondary metabolism.isoprenoids	Symbols: FDH, KCS10 | KCS10 (3-KETOACYL-COA SYNTHASE 10); acyltransferase/ catalytic/ transferase, transferring acyl groups other than amino-acyl groups | chr2:11170418-11173142 REVERSE
BnaA01g05120D	-2.61891	16.2	secondary metabolism.phenylpropanoids	O-methyltransferase family 2 protein | chr1:29130403-29132180 FORWARD
BnaA04g08490D	-2.17583	16.2	secondary metabolism.phenylpropanoids	transferase family protein | chr5:15217910-15219372 REVERSE
BnaA07g05510D	-2.25239	16.2	secondary metabolism.phenylpropanoids	transferase family protein | chr3:18637854-18639185 FORWARD
BnaA07g12070D	-6.35755	16.2	secondary metabolism.phenylpropanoids	transferase family protein | chr5:26795771-26797312 REVERSE
BnaA07g20940D	-3.7577	16.2	secondary metabolism.phenylpropanoids	O-methyltransferase family 2 protein | chr1:29130403-29132180 FORWARD
BnaAnng03710D	-4.09847	16.2	secondary metabolism.phenylpropanoids	transferase family protein | chr3:18635920-18637341 FORWARD
BnaAnng13950D	-4.89724	16.2	secondary metabolism.phenylpropanoids	transferase family protein | chr5:84474-86275 FORWARD
BnaC02g03740D	-2.0494	16.2	secondary metabolism.phenylpropanoids	transferase family protein | chr5:84474-86275 FORWARD
BnaC02g34490D	-2.86642	16.2	secondary metabolism.phenylpropanoids	cinnamoyl-CoA reductase family | chr2:631236-632575 REVERSE
BnaC04g56240D	-1.80902	16.2	secondary metabolism.phenylpropanoids	cinnamoyl-CoA reductase-related | chr2:10177834-10180064 FORWARD
BnaC06g20760D	-1.8367	16.2	secondary metabolism.phenylpropanoids	aminotransferase class I and II family protein | chr1:29188901-29190975 REVERSE
BnaC06g20930D	-4.04141	16.2	secondary metabolism.phenylpropanoids	O-methyltransferase family 2 protein | chr1:29130403-29132180 FORWARD
BnaC06g37280D	-1.60666	16.2	secondary metabolism.phenylpropanoids	3-beta-hydroxy-delta5-steroid dehydrogenase/ binding / catalytic/ cinnamoyl-CoA reductase | chr1:28689770-28691449 REVERSE
BnaC07g07070D	-3.80735	16.2	secondary metabolism.phenylpropanoids	transferase family protein | chr3:18637854-18639185 FORWARD
BnaC07g16220D	-5.68507	16.2	secondary metabolism.phenylpropanoids	transferase family protein | chr5:26795771-26797312 REVERSE
BnaC07g17120D	-3.45966	16.2	secondary metabolism.phenylpropanoids	O-methyltransferase family 2 protein | chr1:29130403-29132180 FORWARD
BnaC08g21660D	-2.68182	16.2	secondary metabolism.phenylpropanoids	transferase family protein | chr3:18635920-18637341 FORWARD
BnaC09g10950D	-1.87447	16.2	secondary metabolism.phenylpropanoids	Symbols: ACOS5 | ACOS5 (ACYL-COA SYNTHETASE 5); 4-coumarate-CoA ligase/ long-chain-fatty-acid-CoA ligase/ medium-chain-fatty-acid-CoA ligase | chr1:23310535-23312747 FORWARD
BnaA04g22470D	1.01928	16.2	secondary metabolism.phenylpropanoids	transferase family protein | chr2:16803092-16804741 REVERSE
BnaC06g15240D	1.24844	16.2	secondary metabolism.phenylpropanoids	transferase family protein | chr5:26795771-26797312 REVERSE
BnaAnng21320D	1.73847	16.2	secondary metabolism.phenylpropanoids	transferase family protein | chr2:16803092-16804741 REVERSE
BnaA05g16430D	2.34194	16.2	secondary metabolism.phenylpropanoids	Symbols: ATPRR1, PRR1 | PRR1 (PINORESINOL REDUCTASE 1); pinoresinol reductase | chr1:11546338-11547994 REVERSE
BnaCnng27890D	2.76062	16.2	secondary metabolism.phenylpropanoids	transferase family protein | chr2:16803092-16804741 REVERSE
BnaA01g21180D	-2.45372	16.2	secondary metabolism.phenylpropanoids	transferase family protein | chr3:18635920-18637341 FORWARD
BnaA02g18320D	-4.40939	16.2	secondary metabolism.phenylpropanoids	O-methyltransferase family 2 protein | chr1:29130403-29132180 FORWARD
BnaA03g02250D	-2.2363	16.2	secondary metabolism.phenylpropanoids	transferase family protein | chr5:2513794-2515418 FORWARD
BnaA04g13980D	-1.37707	16.2	secondary metabolism.phenylpropanoids	cinnamoyl-CoA reductase-related | chr2:10177834-10180064 FORWARD
BnaA04g20860D	7.26053	16.2	secondary metabolism.phenylpropanoids	transferase family protein | chr5:26795771-26797312 REVERSE
BnaA06g39100D	-1.59527	16.2	secondary metabolism.phenylpropanoids	transferase family protein | chr5:8096290-8097660 FORWARD
BnaA07g12060D	-1.45171	16.2	secondary metabolism.phenylpropanoids	Symbols: EPS1 | EPS1 (ENHANCED PSEUDOMONAS SUSCEPTIBILTY 1); transferase/ transferase, transferring acyl groups other than amino-acyl groups | chr5:26797613-26799041 REVERSE
BnaA07g20950D	-5.01355	16.2	secondary metabolism.phenylpropanoids	O-methyltransferase family 2 protein | chr1:29130403-29132180 FORWARD
BnaA07g32800D	-1.77513	16.2	secondary metabolism.phenylpropanoids	3-beta-hydroxy-delta5-steroid dehydrogenase/ binding / catalytic/ cinnamoyl-CoA reductase | chr1:28689770-28691449 REVERSE
BnaA09g25050D	-1.77493	16.2	secondary metabolism.phenylpropanoids	transferase family protein | chr1:11271228-11273294 REVERSE
BnaA09g27140D	-1.06616	16.2	secondary metabolism.phenylpropanoids	transferase family protein | chr1:10078189-10080029 FORWARD
BnaA09g54240D	-1.58496	16.2	secondary metabolism.phenylpropanoids	transferase family protein | chr1:11271228-11273294 REVERSE
BnaAnng38450D	-2.31434	16.2	secondary metabolism.phenylpropanoids	Symbols: NIC2 | NIC2 (NICOTINAMIDASE 2); catalytic/ nicotinamidase | chr5:7825882-7826611 REVERSE
BnaC02g41700D	-1.07995	16.2	secondary metabolism.phenylpropanoids	Symbols: NIC2 | NIC2 (NICOTINAMIDASE 2); catalytic/ nicotinamidase | chr5:7825882-7826611 REVERSE
BnaC03g03270D	-2.43259	16.2	secondary metabolism.phenylpropanoids	transferase family protein | chr5:2513794-2515418 FORWARD
BnaC03g03280D	-2.36565	16.2	secondary metabolism.phenylpropanoids	transferase family protein | chr5:2513794-2515418 FORWARD
BnaC03g72540D	-2.60486	16.2	secondary metabolism.phenylpropanoids	transferase family protein | chr2:16803092-16804741 REVERSE
BnaC04g17540D	2.08182	16.2	secondary metabolism.phenylpropanoids	transferase family protein | chr5:17176384-17178018 FORWARD
BnaC05g22050D	-1.5824	16.2	secondary metabolism.phenylpropanoids	transferase family protein | chr1:10078189-10080029 FORWARD
BnaC08g19310D	1.15933	16.2	secondary metabolism.phenylpropanoids	Symbols: OPCL1 | OPCL1 (OPC-8:0 COA LIGASE1); 4-coumarate-CoA ligase | chr1:7103454-7105881 REVERSE
BnaC09g51230D	-4.75489	16.2	secondary metabolism.phenylpropanoids	O-methyltransferase family 2 protein | chr1:29130403-29132180 FORWARD
BnaCnng64190D	-1.097	16.2	secondary metabolism.phenylpropanoids	aminotransferase class I and II family protein | chr1:29188901-29190975 REVERSE
BnaA08g25720D	-1.29503	16.5	secondary metabolism.sulfur-containing	Symbols: ATCPISCA | ATCPISCA (chloroplast-localized IscA-like protein); structural molecule | chr1:3460000-3461485 REVERSE
BnaA02g13310D	-1.91482	16.7	secondary metabolism.wax	Symbols: YBR159, KCR1 | YBR159; ketoreductase/ oxidoreductase | chr1:25391460-25393610 FORWARD
BnaA03g10070D	-1.60528	16.7	secondary metabolism.wax	Symbols: FLP1, YRE, CER3, WAX2 | CER3 (ECERIFERUM 3); binding / catalytic/ iron ion binding / oxidoreductase | chr5:23420209-23424052 FORWARD
BnaA06g13650D	-1.32689	16.7	secondary metabolism.wax	Symbols: KCS4 | KCS4 (3-KETOACYL-COA SYNTHASE 4); acyltransferase/ catalytic/ transferase, transferring acyl groups other than amino-acyl groups | chr1:6728984-6730931 FORWARD
BnaA10g11680D	-4.56135	16.7	secondary metabolism.wax	Symbols: FLP1, YRE, CER3, WAX2 | CER3 (ECERIFERUM 3); binding / catalytic/ iron ion binding / oxidoreductase | chr5:23420209-23424052 FORWARD
BnaC03g14290D	-3.53942	16.7	secondary metabolism.wax	membrane bound O-acyl transferase (MBOAT) family protein / wax synthase-related | chr5:22442356-22443393 REVERSE
BnaC06g28830D	-3.28168	16.7	secondary metabolism.wax	Symbols: YBR159, KCR1 | YBR159; ketoreductase/ oxidoreductase | chr1:25391460-25393610 FORWARD
BnaC09g08890D	-1.84435	16.7	secondary metabolism.wax	Symbols: KCS9 | KCS9 (3-KETOACYL-COA SYNTHASE 9); acyltransferase/ catalytic/ transferase, transferring acyl groups other than amino-acyl groups | chr2:7050944-7052897 FORWARD
BnaA02g08090D	-1.60683	16.7	secondary metabolism.wax	Symbols: FLP1, YRE, CER3, WAX2 | CER3 (ECERIFERUM 3); binding / catalytic/ iron ion binding / oxidoreductase | chr5:23420209-23424052 FORWARD
BnaA07g03590D	-2.39286	16.7	secondary metabolism.wax	Symbols: KCS9 | KCS9 (3-KETOACYL-COA SYNTHASE 9); acyltransferase/ catalytic/ transferase, transferring acyl groups other than amino-acyl groups | chr2:7050944-7052897 FORWARD
BnaA07g24600D	-2.10193	16.7	secondary metabolism.wax	Symbols: CUT1, POP1, CER6, G2, KCS6 | KCS6 (3-KETOACYL-COA SYNTHASE 6); catalytic/ transferase, transferring acyl groups other than amino-acyl groups | chr1:25712588-25714807 REVERSE
BnaA07g26670D	-2.83248	16.7	secondary metabolism.wax	Symbols: YBR159, KCR1 | YBR159; ketoreductase/ oxidoreductase | chr1:25391460-25393610 FORWARD
BnaA09g08660D	-11.0293	16.7	secondary metabolism.wax	Symbols: KCS9 | KCS9 (3-KETOACYL-COA SYNTHASE 9); acyltransferase/ catalytic/ transferase, transferring acyl groups other than amino-acyl groups | chr2:7050944-7052897 FORWARD
BnaA09g28510D	-2.68983	16.7	secondary metabolism.wax	Symbols: CUT1, POP1, CER6, G2, KCS6 | KCS6 (3-KETOACYL-COA SYNTHASE 6); catalytic/ transferase, transferring acyl groups other than amino-acyl groups | chr1:25712588-25714807 REVERSE
BnaC02g11200D	-2.92636	16.7	secondary metabolism.wax	Symbols: FLP1, YRE, CER3, WAX2 | CER3 (ECERIFERUM 3); binding / catalytic/ iron ion binding / oxidoreductase | chr5:23420209-23424052 FORWARD
BnaC02g17470D	-1.07433	16.7	secondary metabolism.wax	Symbols: YBR159, KCR1 | YBR159; ketoreductase/ oxidoreductase | chr1:25391460-25393610 FORWARD
BnaC06g25830D	-1.83337	16.7	secondary metabolism.wax	Symbols: CUT1, POP1, CER6, G2, KCS6 | KCS6 (3-KETOACYL-COA SYNTHASE 6); catalytic/ transferase, transferring acyl groups other than amino-acyl groups | chr1:25712588-25714807 REVERSE
BnaC07g05570D	-3.04345	16.7	secondary metabolism.wax	Symbols: KCS9 | KCS9 (3-KETOACYL-COA SYNTHASE 9); acyltransferase/ catalytic/ transferase, transferring acyl groups other than amino-acyl groups | chr2:7050944-7052897 FORWARD
BnaC09g16050D	-1.53605	16.7	secondary metabolism.wax	Symbols: CER1 | CER1 (ECERIFERUM 1); octadecanal decarbonylase | chr1:418767-422438 FORWARD
BnaCnng09200D	-2.15446	16.7	secondary metabolism.wax	Symbols: CER1 | CER1 (ECERIFERUM 1); octadecanal decarbonylase | chr1:418767-422438 FORWARD
BnaCnng19590D	-2.35834	16.7	secondary metabolism.wax	Symbols: FLP1, YRE, CER3, WAX2 | CER3 (ECERIFERUM 3); binding / catalytic/ iron ion binding / oxidoreductase | chr5:23420209-23424052 FORWARD
BnaA02g10670D	-1.29513	16.99	secondary metabolism.unspecified	ornithine cyclodeaminase/mu-crystallin family protein | chr5:21399331-21400603 FORWARD
BnaA10g11520D	-1.1406	16.99	secondary metabolism.unspecified	Symbols: BIO1 | BIO1 (biotin auxotroph 1); adenosylmethionine-8-amino-7-oxononanoate transaminase | chr5:23318508-23322770 REVERSE
BnaC03g12880D	-1.38434	16.99	secondary metabolism.unspecified	Symbols: BIO1 | BIO1 (biotin auxotroph 1); adenosylmethionine-8-amino-7-oxononanoate transaminase | chr5:23318508-23322770 REVERSE
BnaA10g25590D	-1.1177	16.99	secondary metabolism.unspecified	Symbols: ATBIOF | ATBIOF (BIOTIN F); 8-amino-7-oxononanoate synthase/ transaminase | chr5:1327213-1330091 FORWARD
BnaC02g14970D	-1.16212	16.99	secondary metabolism.unspecified	ornithine cyclodeaminase/mu-crystallin family protein | chr5:21399331-21400603 FORWARD
BnaC09g32740D	1.67619	16.99	secondary metabolism.unspecified	Symbols: BIO1 | BIO1 (biotin auxotroph 1); adenosylmethionine-8-amino-7-oxononanoate transaminase | chr5:23318508-23322770 REVERSE
BnaA09g41920D	-1.91667	17	hormone metabolism	Symbols: ACL, ATMES2, MES2, ATME8, ME8 | ACL (ACETONE-CYANOHYDRIN LYASE); hydrolase/ hydrolase, acting on ester bonds / methyl indole-3-acetate esterase/ methyl jasmonate esterase/ methyl salicylate esterase | chr2:10042199-10043673 REVERSE
BnaA05g28050D	-1.16779	17.2	hormone metabolism.auxin	Symbols: MES17, ATMES17 | MES17 (METHYL ESTERASE 17); hydrolase/ hydrolase, acting on ester bonds / methyl indole-3-acetate esterase | chr3:3401078-3402672 REVERSE
BnaA01g31390D	-2.44392	17.2	hormone metabolism.auxin	Symbols: MES17, ATMES17 | MES17 (METHYL ESTERASE 17); hydrolase/ hydrolase, acting on ester bonds / methyl indole-3-acetate esterase | chr3:3401078-3402672 REVERSE
BnaA01g25380D	-1.49538	18	Co-factor and vitamine metabolism	Symbols: NADK1, ATNADK-1 | NADK1 (NAD KINASE 1); NAD+ kinase/ NADH kinase/ calmodulin binding | chr3:7380191-7383980 REVERSE
BnaA02g26970D	-1.05766	18	Co-factor and vitamine metabolism	Symbols: QPT | QPT (QUINOLINATE PHOSHORIBOSYLTRANSFERASE); nicotinate-nucleotide diphosphorylase (carboxylating) | chr2:165141-167259 REVERSE
BnaA03g10340D	-3.46989	18	Co-factor and vitamine metabolism	UbiE/COQ5 methyltransferase family protein | chr5:23208561-23211090 REVERSE
BnaA04g27170D	-2.59759	18	Co-factor and vitamine metabolism	pyridoxine 5'-phosphate oxidase-related | chr2:19129241-19130595 REVERSE
BnaA10g02760D	-2.03868	18	Co-factor and vitamine metabolism	coenzyme F420 hydrogenase family / dehydrogenase, beta subunit family | chr1:1282741-1286584 REVERSE
BnaA10g09920D	-1.47595	18	Co-factor and vitamine metabolism	Symbols: AtNMNAT | AtNMNAT (A. thaliana nicotinate/nicotinamide mononucleotide adenyltransferase); nicotinamide-nucleotide adenylyltransferase/ nicotinate-nucleotide adenylyltransferase | chr5:22584008-22586301 REVERSE
BnaA10g11360D	-1.23158	18	Co-factor and vitamine metabolism	UbiE/COQ5 methyltransferase family protein | chr5:23208561-23211090 REVERSE
BnaC03g13010D	-2.47573	18	Co-factor and vitamine metabolism	UbiE/COQ5 methyltransferase family protein | chr5:23208561-23211090 REVERSE
BnaC03g14040D	-3.5767	18	Co-factor and vitamine metabolism	Symbols: AtNMNAT | AtNMNAT (A. thaliana nicotinate/nicotinamide mononucleotide adenyltransferase); nicotinamide-nucleotide adenylyltransferase/ nicotinate-nucleotide adenylyltransferase | chr5:22584008-22586301 REVERSE
BnaC04g50900D	-3.20578	18	Co-factor and vitamine metabolism	pyridoxine 5'-phosphate oxidase-related | chr2:19129241-19130595 REVERSE
BnaC05g49020D	-1.56343	18	Co-factor and vitamine metabolism	Symbols: LIP2 | LIP2 (LIPOYLTRANSFERASE 2); lipoyltransferase | chr1:1292080-1293357 FORWARD
BnaC05g49040D	-1.71586	18	Co-factor and vitamine metabolism	coenzyme F420 hydrogenase family / dehydrogenase, beta subunit family | chr1:1282741-1286584 REVERSE
BnaC09g32370D	-1.43296	18	Co-factor and vitamine metabolism	Symbols: AtNMNAT | AtNMNAT (A. thaliana nicotinate/nicotinamide mononucleotide adenyltransferase); nicotinamide-nucleotide adenylyltransferase/ nicotinate-nucleotide adenylyltransferase | chr5:22584008-22586301 REVERSE
BnaC09g32920D	-1.54709	18	Co-factor and vitamine metabolism	UbiE/COQ5 methyltransferase family protein | chr5:23208561-23211090 REVERSE
BnaA03g23330D	-1.20308	18	Co-factor and vitamine metabolism	Symbols: ATPPOX, PDX3 | ATPPOX (A. THALIANA PYRIDOXIN (PYRODOXAMINE) 5'-PHOSPHATE OXIDASE); pyridoxamine-phosphate oxidase | chr5:20329187-20333155 FORWARD
BnaA10g02780D	-1.44806	18	Co-factor and vitamine metabolism	Symbols: LIP2 | LIP2 (LIPOYLTRANSFERASE 2); lipoyltransferase | chr1:1292080-1293357 FORWARD
BnaC01g07340D	-1.46609	18	Co-factor and vitamine metabolism	lipoyltransferase (LIP2p) | chr4:15114250-15115633 FORWARD
BnaC03g41860D	-1.1568	18	Co-factor and vitamine metabolism	Symbols: NADK1, ATNADK-1 | NADK1 (NAD KINASE 1); NAD+ kinase/ NADH kinase/ calmodulin binding | chr3:7380191-7383980 REVERSE
BnaA10g09380D	-1.52632	18.1	Co-factor and vitamine metabolism.molybdenum cofactor	Symbols: CNX5, SIR1 | CNX5 (CO-FACTOR FOR NITRATE, REDUCTASE AND XANTHINE DEHYDROGENASE 5); Mo-molybdopterin cofactor sulfurase | chr5:22373180-22376086 REVERSE
BnaC02g13300D	-1.49083	18.1	Co-factor and vitamine metabolism.molybdenum cofactor	Symbols: CNX5, SIR1 | CNX5 (CO-FACTOR FOR NITRATE, REDUCTASE AND XANTHINE DEHYDROGENASE 5); Mo-molybdopterin cofactor sulfurase | chr5:22373180-22376086 REVERSE
BnaC04g03060D	-1.04535	18.1	Co-factor and vitamine metabolism.molybdenum cofactor	molybdopterin biosynthesis MoaE family protein | chr2:18132782-18134068 FORWARD
BnaC09g31780D	-1.81561	18.1	Co-factor and vitamine metabolism.molybdenum cofactor	Symbols: CNX5, SIR1 | CNX5 (CO-FACTOR FOR NITRATE, REDUCTASE AND XANTHINE DEHYDROGENASE 5); Mo-molybdopterin cofactor sulfurase | chr5:22373180-22376086 REVERSE
BnaCnng08640D	-2.60532	18.1	Co-factor and vitamine metabolism.molybdenum cofactor	Symbols: CNX3 | CNX3 (COFACTOR OF NITRATE REDUCTASE AND XANTHINE DEHYDROGENASE 3); catalytic | chr1:114286-115549 FORWARD
BnaA03g55730D	-2.53273	18.11	Co-factor and vitamine metabolism.lipoic acid	lipoic acid synthase family protein | chr5:2710817-2713132 REVERSE
BnaAnng06100D	-2.64348	18.11	Co-factor and vitamine metabolism.lipoic acid	lipoic acid synthase family protein | chr5:2710817-2713132 REVERSE
BnaC02g01120D	-2.4257	18.11	Co-factor and vitamine metabolism.lipoic acid	lipoic acid synthase family protein | chr5:2710817-2713132 REVERSE
BnaC03g03580D	-2.867	18.11	Co-factor and vitamine metabolism.lipoic acid	lipoic acid synthase family protein | chr5:2710817-2713132 REVERSE
BnaA02g18940D	-1.46516	18.12	Co-factor and vitamine metabolism.NADH kinase	Symbols: NADK3, ATNADK-3 | NADK3 (NAD(H) KINASE 3); NAD+ kinase/ NADH kinase | chr1:29564249-29566375 FORWARD
BnaC02g25050D	-2.35337	18.12	Co-factor and vitamine metabolism.NADH kinase	Symbols: NADK3, ATNADK-3 | NADK3 (NAD(H) KINASE 3); NAD+ kinase/ NADH kinase | chr1:29564249-29566375 FORWARD
BnaA02g09460D	-2.4275	18.2	Co-factor and vitamine metabolism.thiamine	Symbols: THI1, TZ, THI4 | THI1; protein homodimerization | chr5:22246592-22248332 FORWARD
BnaA02g27980D	-2.74033	18.2	Co-factor and vitamine metabolism.thiamine	Symbols: THI1, TZ, THI4 | THI1; protein homodimerization | chr5:22246592-22248332 FORWARD
BnaA03g11710D	-1.91668	18.2	Co-factor and vitamine metabolism.thiamine	Symbols: THI1, TZ, THI4 | THI1; protein homodimerization | chr5:22246592-22248332 FORWARD
BnaA03g33660D	-2.62911	18.2	Co-factor and vitamine metabolism.thiamine	4-methyl-5(b-hydroxyethyl)-thiazole monophosphate biosynthesis protein, putative | chr3:5047400-5049877 FORWARD
BnaA05g24540D	-2.41836	18.2	Co-factor and vitamine metabolism.thiamine	4-methyl-5(b-hydroxyethyl)-thiazole monophosphate biosynthesis protein, putative | chr3:5047400-5049877 FORWARD
BnaA07g05920D	-1.94959	18.2	Co-factor and vitamine metabolism.thiamine	hydroxyethylthiazole kinase family protein | chr3:8679552-8680824 REVERSE
BnaA10g08550D	-2.98848	18.2	Co-factor and vitamine metabolism.thiamine	Symbols: THI1, TZ, THI4 | THI1; protein homodimerization | chr5:22246592-22248332 FORWARD
BnaC03g38830D	-2.74922	18.2	Co-factor and vitamine metabolism.thiamine	4-methyl-5(b-hydroxyethyl)-thiazole monophosphate biosynthesis protein, putative | chr3:5047400-5049877 FORWARD
BnaC04g54380D	-1.56402	18.2	Co-factor and vitamine metabolism.thiamine	Symbols: THIC | THIC (ThiaminC); ADP-ribose pyrophosphohydrolase/ catalytic/ iron-sulfur cluster binding | chr2:12667034-12670311 FORWARD
BnaC09g31160D	-2.76248	18.2	Co-factor and vitamine metabolism.thiamine	Symbols: THI1, TZ, THI4 | THI1; protein homodimerization | chr5:22246592-22248332 FORWARD
BnaA05g12410D	-1.16457	18.2	Co-factor and vitamine metabolism.thiamine	Symbols: THIC | THIC (ThiaminC); ADP-ribose pyrophosphohydrolase/ catalytic/ iron-sulfur cluster binding | chr2:12667034-12670311 FORWARD
BnaC03g71780D	-1.44698	18.2	Co-factor and vitamine metabolism.thiamine	Symbols: THI1, TZ, THI4 | THI1; protein homodimerization | chr5:22246592-22248332 FORWARD
BnaC05g38540D	-2.09489	18.2	Co-factor and vitamine metabolism.thiamine	4-methyl-5(b-hydroxyethyl)-thiazole monophosphate biosynthesis protein, putative | chr3:5047400-5049877 FORWARD
BnaC07g07260D	-1.40493	18.2	Co-factor and vitamine metabolism.thiamine	hydroxyethylthiazole kinase family protein | chr3:8679552-8680824 REVERSE
BnaA01g11320D	-1.03976	18.3	Co-factor and vitamine metabolism.riboflavin	Symbols: ATFMN/FHY | ATFMN/FHY (riboflavin kinase/FMN hydrolase); FMN adenylyltransferase/ riboflavin kinase | chr4:11431105-11433322 FORWARD
BnaA03g02490D	-2.33985	18.3	Co-factor and vitamine metabolism.riboflavin	riboflavin biosynthesis protein-related | chr5:2683832-2685636 FORWARD
BnaC03g03500D	-1.2799	18.3	Co-factor and vitamine metabolism.riboflavin	riboflavin biosynthesis protein-related | chr5:2683832-2685636 FORWARD
BnaC01g12760D	-1.12157	18.3	Co-factor and vitamine metabolism.riboflavin	Symbols: ATFMN/FHY | ATFMN/FHY (riboflavin kinase/FMN hydrolase); FMN adenylyltransferase/ riboflavin kinase | chr4:11431105-11433322 FORWARD
BnaA09g08060D	-1.59948	18.5	Co-factor and vitamine metabolism.folate & vitamine K	3-dehydroquinate synthase, putative | chr5:26431376-26433778 REVERSE
BnaA03g14790D	-1.18658	18.6	Co-factor and vitamine metabolism.biotin	Symbols: CNX2 | CNX2 (COFACTOR OF NITRATE REDUCTASE AND XANTHINE DEHYDROGENASE 2); catalytic | chr2:13584139-13586589 REVERSE
BnaA09g08830D	-1.88024	18.7	Co-factor and vitamine metabolism.iron-sulphur clusters	hesB-like domain-containing protein | chr2:7248138-7250291 FORWARD
BnaA10g06200D	-1.64605	18.7	Co-factor and vitamine metabolism.iron-sulphur clusters	Symbols: QS, OLD5, SUFE3 | QS (QUINOLINATE SYNTHASE); 4 iron, 4 sulfur cluster binding / enzyme activator/ protein homodimerization/ quinolinate synthetase A | chr5:20442647-20445991 FORWARD
BnaCnng77330D	-1.55363	18.7	Co-factor and vitamine metabolism.iron-sulphur clusters	Symbols: QS, OLD5, SUFE3 | QS (QUINOLINATE SYNTHASE); 4 iron, 4 sulfur cluster binding / enzyme activator/ protein homodimerization/ quinolinate synthetase A | chr5:20442647-20445991 FORWARD
BnaC05g32810D	2.44298	18.7	Co-factor and vitamine metabolism.iron-sulphur clusters	Symbols: NBP35 | NBP35 (NUCLEOTIDE BINDING PROTEIN 35); iron-sulfur cluster binding / nucleotide binding / protein homodimerization | chr5:20734167-20736055 FORWARD
BnaA05g19320D	2.61559	18.7	Co-factor and vitamine metabolism.iron-sulphur clusters	Symbols: NBP35 | NBP35 (NUCLEOTIDE BINDING PROTEIN 35); iron-sulfur cluster binding / nucleotide binding / protein homodimerization | chr5:20734167-20736055 FORWARD
BnaA07g29860D	-1.01654	18.7	Co-factor and vitamine metabolism.iron-sulphur clusters	radical SAM domain-containing protein / TRAM domain-containing protein | chr1:27123567-27126895 FORWARD
BnaC06g29040D	-1.81069	18.7	Co-factor and vitamine metabolism.iron-sulphur clusters	Symbols: SUFE2 | SUFE2 (SULFUR E 2); enzyme activator | chr1:25426488-25427349 FORWARD
BnaA09g19510D	-1.0628	19.1	tetrapyrrole synthesis.glu-tRNA synthetase	glutamyl-tRNA(Gln) amidotransferase, putative | chr3:9339423-9342204 REVERSE
BnaC09g52600D	-1.26513	19.1	tetrapyrrole synthesis.glu-tRNA synthetase	glutamyl-tRNA(Gln) amidotransferase, putative | chr3:9339423-9342204 REVERSE
BnaA10g04570D	-9.14636	19.1	tetrapyrrole synthesis.glu-tRNA synthetase	Symbols: GATB | GATB (GLU-ADT SUBUNIT B); carbon-nitrogen ligase, with glutamine as amido-N-donor / glutaminyl-tRNA synthase (glutamine-hydrolyzing)/ ligase | chr1:17940100-17942822 FORWARD
BnaA01g14420D	-1.84191	19.11	tetrapyrrole synthesis.magnesium protoporphyrin IX methyltransferase	Symbols: CHLM | CHLM (magnesium-protoporphyrin IX methyltransferase); magnesium protoporphyrin IX methyltransferase | chr4:12876948-12878647 FORWARD
BnaA03g47110D	-2.78046	19.11	tetrapyrrole synthesis.magnesium protoporphyrin IX methyltransferase	Symbols: CHLM | CHLM (magnesium-protoporphyrin IX methyltransferase); magnesium protoporphyrin IX methyltransferase | chr4:12876948-12878647 FORWARD
BnaC01g17000D	-1.496	19.11	tetrapyrrole synthesis.magnesium protoporphyrin IX methyltransferase	Symbols: CHLM | CHLM (magnesium-protoporphyrin IX methyltransferase); magnesium protoporphyrin IX methyltransferase | chr4:12876948-12878647 FORWARD
BnaC07g39280D	-2.61198	19.11	tetrapyrrole synthesis.magnesium protoporphyrin IX methyltransferase	Symbols: CHLM | CHLM (magnesium-protoporphyrin IX methyltransferase); magnesium protoporphyrin IX methyltransferase | chr4:12876948-12878647 FORWARD
BnaCnng20460D	-1.05273	19.12	tetrapyrrole synthesis.magnesium-protoporphyrin IX monomethyl ester (oxidative) cyclase	Symbols: CRD1, CHL27, ACSF | CRD1 (COPPER RESPONSE DEFECT 1); DNA binding / magnesium-protoporphyrin IX monomethyl ester (oxidative) cyclase | chr3:21076544-21078443 FORWARD
BnaA10g16310D	-2.00685	19.13	tetrapyrrole synthesis.divinyl chlorophyllide-a 8-vinyl-reductase	Symbols: PCB2 | PCB2 (PALE-GREEN AND CHLOROPHYLL B REDUCED 2); 3,8-divinyl protochlorophyllide a 8-vinyl reductase | chr5:6220781-6222228 REVERSE
BnaC09g39160D	-1.97017	19.13	tetrapyrrole synthesis.divinyl chlorophyllide-a 8-vinyl-reductase	Symbols: PCB2 | PCB2 (PALE-GREEN AND CHLOROPHYLL B REDUCED 2); 3,8-divinyl protochlorophyllide a 8-vinyl reductase | chr5:6220781-6222228 REVERSE
BnaA01g16440D	-2.29544	19.14	tetrapyrrole synthesis.protochlorophyllide reductase	Symbols: PORB | PORB (PROTOCHLOROPHYLLIDE OXIDOREDUCTASE B); oxidoreductase/ protochlorophyllide reductase | chr4:13725546-13727353 FORWARD
BnaA03g48610D	-3.12223	19.14	tetrapyrrole synthesis.protochlorophyllide reductase	Symbols: PORB | PORB (PROTOCHLOROPHYLLIDE OXIDOREDUCTASE B); oxidoreductase/ protochlorophyllide reductase | chr4:13725546-13727353 FORWARD
BnaA08g27540D	-1.50156	19.14	tetrapyrrole synthesis.protochlorophyllide reductase	Symbols: POR C, PORC | POR C (PROTOCHLOROPHYLLIDE OXIDOREDUCTASE); NADPH dehydrogenase/ oxidoreductase/ protochlorophyllide reductase | chr1:907642-909376 FORWARD
BnaA10g02050D	-1.42796	19.14	tetrapyrrole synthesis.protochlorophyllide reductase	Symbols: POR C, PORC | POR C (PROTOCHLOROPHYLLIDE OXIDOREDUCTASE); NADPH dehydrogenase/ oxidoreductase/ protochlorophyllide reductase | chr1:907642-909376 FORWARD
BnaC01g19630D	-2.25516	19.14	tetrapyrrole synthesis.protochlorophyllide reductase	Symbols: PORB | PORB (PROTOCHLOROPHYLLIDE OXIDOREDUCTASE B); oxidoreductase/ protochlorophyllide reductase | chr4:13725546-13727353 FORWARD
BnaC05g01980D	-1.22649	19.14	tetrapyrrole synthesis.protochlorophyllide reductase	Symbols: POR C, PORC | POR C (PROTOCHLOROPHYLLIDE OXIDOREDUCTASE); NADPH dehydrogenase/ oxidoreductase/ protochlorophyllide reductase | chr1:907642-909376 FORWARD
BnaC07g40900D	-2.24521	19.14	tetrapyrrole synthesis.protochlorophyllide reductase	Symbols: PORB | PORB (PROTOCHLOROPHYLLIDE OXIDOREDUCTASE B); oxidoreductase/ protochlorophyllide reductase | chr4:13725546-13727353 FORWARD
BnaC08g05120D	1.47992	19.16	tetrapyrrole synthesis.chlorophyll b synthase	Symbols: CH1, ATCAO, CAO | CH1 (CHLORINA 1); chlorophyllide a oxygenase | chr1:16848359-16851224 REVERSE
BnaA01g20360D	-1.86686	19.2	tetrapyrrole synthesis.glu-tRNA reductase	Symbols: HEMA2 | HEMA2; glutamyl-tRNA reductase | chr1:3236995-3239554 REVERSE
BnaA01g35850D	1.75197	19.2	tetrapyrrole synthesis.glu-tRNA reductase	Symbols: HEMA1 | HEMA1; glutamyl-tRNA reductase | chr1:21623726-21626200 REVERSE
BnaC01g25600D	-1.15978	19.2	tetrapyrrole synthesis.glu-tRNA reductase	Symbols: HEMA2 | HEMA2; glutamyl-tRNA reductase | chr1:3236995-3239554 REVERSE
BnaC01g28060D	1.79133	19.2	tetrapyrrole synthesis.glu-tRNA reductase	Symbols: HEMA1 | HEMA1; glutamyl-tRNA reductase | chr1:21623726-21626200 REVERSE
BnaA07g12810D	-1.14406	19.21	tetrapyrrole synthesis.heme oxygenase	Symbols: ATHO1, HO1, TED4, GUN2, HY6 | TED4 (REVERSAL OF THE DET PHENOTYPE 4); heme oxygenase (decyclizing) | chr2:11341684-11343572 FORWARD
BnaA08g02220D	-1.12716	19.32	tetrapyrrole synthesis.sirohydrochlorin ferrochelatase	Symbols: ATSIRB | ATSIRB (ARABIDOPSIS THALIANA SIROHYDROCHLORIN FERROCHELATASE B); sirohydrochlorin ferrochelatase | chr1:18582024-18583724 FORWARD
BnaC06g27900D	-2.05683	19.4	tetrapyrrole synthesis.ALA dehydratase	Symbols: HEMB1 | HEMB1; catalytic/ metal ion binding / porphobilinogen synthase | chr1:26231804-26234963 FORWARD
BnaA03g02420D	-1.48592	19.5	tetrapyrrole synthesis.porphobilinogen deaminase	Symbols: HEMC | HEMC (HYDROXYMETHYLBILANE SYNTHASE); hydroxymethylbilane synthase | chr5:2663499-2665792 REVERSE
BnaAnng06210D	-2.20788	19.5	tetrapyrrole synthesis.porphobilinogen deaminase	Symbols: HEMC | HEMC (HYDROXYMETHYLBILANE SYNTHASE); hydroxymethylbilane synthase | chr5:2663499-2665792 REVERSE
BnaC02g01240D	-1.35815	19.5	tetrapyrrole synthesis.porphobilinogen deaminase	Symbols: HEMC | HEMC (HYDROXYMETHYLBILANE SYNTHASE); hydroxymethylbilane synthase | chr5:2663499-2665792 REVERSE
BnaA09g40440D	-1.35446	19.6	tetrapyrrole synthesis.uroporphyrinogen III synthase	Symbols: HEMD | HEMD; uroporphyrinogen-III synthase | chr2:11287365-11290360 REVERSE
BnaC04g47210D	-1.21419	19.7	tetrapyrrole synthesis.uroporphyrinogen decarboxylase	Symbols: HEME2 | HEME2; uroporphyrinogen decarboxylase | chr2:16912845-16915177 FORWARD
BnaC05g38600D	-1.65489	19.7	tetrapyrrole synthesis.uroporphyrinogen decarboxylase	Symbols: HEME1 | HEME1; uroporphyrinogen decarboxylase | chr3:5020570-5022959 FORWARD
BnaA05g01720D	2.72792	19.7	tetrapyrrole synthesis.uroporphyrinogen decarboxylase	Symbols: HEME2 | HEME2; uroporphyrinogen decarboxylase | chr2:16912845-16915177 FORWARD
BnaA09g06520D	-3.02237	19.8	tetrapyrrole synthesis.coproporphyrinogen III oxidase	coproporphyrinogen oxidase-related | chr5:25369245-25370921 REVERSE
BnaA09g50920D	-2.2513	19.8	tetrapyrrole synthesis.coproporphyrinogen III oxidase	Symbols: LIN2, HEMF1, ATCPO-I | LIN2 (LESION INITIATION 2); coproporphyrinogen oxidase | chr1:869051-871211 REVERSE
BnaC08g45590D	-1.83732	19.8	tetrapyrrole synthesis.coproporphyrinogen III oxidase	Symbols: LIN2, HEMF1, ATCPO-I | LIN2 (LESION INITIATION 2); coproporphyrinogen oxidase | chr1:869051-871211 REVERSE
BnaCnng15780D	-1.75489	19.8	tetrapyrrole synthesis.coproporphyrinogen III oxidase	coproporphyrinogen oxidase-related | chr5:25369245-25370921 REVERSE
BnaA10g01960D	-1.07215	19.8	tetrapyrrole synthesis.coproporphyrinogen III oxidase	Symbols: LIN2, HEMF1, ATCPO-I | LIN2 (LESION INITIATION 2); coproporphyrinogen oxidase | chr1:869051-871211 REVERSE
BnaA10g19460D	-1.27745	19.9	tetrapyrrole synthesis.protoporphyrin IX oxidase	Symbols: HEMG2, MEE61, PPO2 | HEMG2; electron carrier/ oxidoreductase/ protoporphyrinogen oxidase | chr5:4583269-4587427 REVERSE
BnaC09g54390D	-1.65372	19.9	tetrapyrrole synthesis.protoporphyrin IX oxidase	Symbols: HEMG2, MEE61, PPO2 | HEMG2; electron carrier/ oxidoreductase/ protoporphyrinogen oxidase | chr5:4583269-4587427 REVERSE
BnaC05g31170D	-2.04569	19.99	tetrapyrrole synthesis.unspecified	flavodoxin family protein | chr3:453421-457841 FORWARD
BnaAnng28520D	2.16335	19.99	tetrapyrrole synthesis.unspecified	Symbols: ATCLH2, CLH2 | ATCLH2; chlorophyllase | chr5:17630450-17632312 FORWARD
BnaCnng19750D	2.18094	19.99	tetrapyrrole synthesis.unspecified	Symbols: ATCLH2, CLH2 | ATCLH2; chlorophyllase | chr5:17630450-17632312 FORWARD
BnaC02g30620D	2.67509	19.99	tetrapyrrole synthesis.unspecified	Symbols: ATCLH2, CLH2 | ATCLH2; chlorophyllase | chr5:17630450-17632312 FORWARD
BnaA06g38400D	-1.27198	19.99	tetrapyrrole synthesis.unspecified	SOUL heme-binding family protein | chr1:5844676-5845661 FORWARD
BnaC04g03820D	1.15708	19.99	tetrapyrrole synthesis.unspecified	Symbols: COX10 | COX10 (cytochrome c oxidase 10); prenyltransferase/ protoheme IX farnesyltransferase | chr2:18379564-18381942 FORWARD
BnaC05g13240D	-1.24102	19.99	tetrapyrrole synthesis.unspecified	SOUL heme-binding family protein | chr1:5844676-5845661 FORWARD
BnaA02g21330D	-2.78582	20	stress	stress-inducible protein, putative | chr4:7338659-7341361 REVERSE
BnaA09g55900D	-2.24404	20	stress	Symbols: SEP2 | SEP2 (STRESS ENHANCED PROTEIN 2); chlorophyll binding | chr2:9356983-9357916 REVERSE
BnaC08g35470D	-1.83721	20	stress	Symbols: SEP2 | SEP2 (STRESS ENHANCED PROTEIN 2); chlorophyll binding | chr2:9356983-9357916 REVERSE
BnaA09g12780D	1.1535	20	stress	stress-inducible protein, putative | chr1:23230956-23233543 FORWARD
BnaC04g19260D	-1.68031	20	stress	stress-inducible protein, putative | chr1:23230956-23233543 FORWARD
BnaC08g41350D	7.38082	20	stress	stress-inducible protein, putative | chr1:4172075-4174775 FORWARD
BnaA01g03580D	-4.41167	20.1	stress.biotic	Symbols: ADR1-L1 | ADR1-L1 (ADR1-like 1); ATP binding / protein binding | chr4:16051051-16056526 REVERSE
BnaA01g19200D	-1.47774	20.1	stress.biotic	Symbols: AtRLP48 | AtRLP48 (Receptor Like Protein 48); protein binding | chr4:8025804-8028614 FORWARD
BnaA01g31190D	-5.58496	20.1	stress.biotic	Symbols: AtRLP43 | AtRLP43 (Receptor Like Protein 43); kinase/ protein binding | chr3:10895977-10898841 REVERSE
BnaA01g31220D	-3.72048	20.1	stress.biotic	Symbols: AtRLP43 | AtRLP43 (Receptor Like Protein 43); kinase/ protein binding | chr3:10895977-10898841 REVERSE
BnaA01g31270D	-8.53138	20.1	stress.biotic	Symbols: AtRLP43 | AtRLP43 (Receptor Like Protein 43); kinase/ protein binding | chr3:10895977-10898841 REVERSE
BnaA02g17100D	-2.35755	20.1	stress.biotic	Symbols: ATLP-3 | ATLP-3 | chr1:28174378-28175383 FORWARD
BnaA02g17480D	-2.54021	20.1	stress.biotic	pathogenesis-related thaumatin family protein | chr1:28458782-28460854 FORWARD
BnaA02g25170D	-1.00912	20.1	stress.biotic	ATP binding / GTP binding / nucleoside-triphosphatase/ nucleotide binding | chr5:19189411-19192516 FORWARD
BnaA02g26210D	-2.43653	20.1	stress.biotic	Symbols: PDF2.3, LCR68 | LCR68 (LOW-MOLECULAR-WEIGHT CYSTEINE-RICH 68); peptidase inhibitor | chr2:539999-540634 FORWARD
BnaA02g32580D	-3.20163	20.1	stress.biotic	Symbols: CW9 | CW9; ATP binding | chr1:21902284-21905685 FORWARD
BnaA02g32670D	-1.66388	20.1	stress.biotic	Symbols: CW9 | CW9; ATP binding | chr1:21902284-21905685 FORWARD
BnaA03g20300D	-4.26946	20.1	stress.biotic	chitinase, putative | chr2:18078649-18080028 REVERSE
BnaA03g41780D	-1.30279	20.1	stress.biotic	Symbols: PAD4, ATPAD4 | PAD4 (PHYTOALEXIN DEFICIENT 4); lipase/ protein binding / triacylglycerol lipase | chr3:19431371-19434403 FORWARD
BnaA03g43880D	-1.43964	20.1	stress.biotic	Symbols: EDR2 | EDR2; lipid binding | chr4:10431520-10437425 REVERSE
BnaA04g05420D	-3.55106	20.1	stress.biotic	Symbols: PAD4, ATPAD4 | PAD4 (PHYTOALEXIN DEFICIENT 4); lipase/ protein binding / triacylglycerol lipase | chr3:19431371-19434403 FORWARD
BnaA04g05430D	-3.92765	20.1	stress.biotic	Symbols: PAD4, ATPAD4 | PAD4 (PHYTOALEXIN DEFICIENT 4); lipase/ protein binding / triacylglycerol lipase | chr3:19431371-19434403 FORWARD
BnaA04g09570D	-1.80812	20.1	stress.biotic	Symbols: AIG2L | AIG2L (AVIRULENCE INDUCED GENE 2 LIKE PROTEIN) | chr5:15899646-15900653 FORWARD
BnaA04g25220D	-8.43741	20.1	stress.biotic	chitinase, putative | chr2:18081331-18082767 REVERSE
BnaA05g10570D	-3.14639	20.1	stress.biotic	Symbols: AtRLP26 | AtRLP26 (Receptor Like Protein 26); kinase/ protein binding | chr2:14021870-14024398 FORWARD
BnaA05g32660D	-2.68017	20.1	stress.biotic	Symbols: CHAT | CHAT (acetyl CoA:(Z)-3-hexen-1-ol acetyltransferase); acetyl CoA:(Z)-3-hexen-1-ol acetyltransferase | chr3:828296-829896 REVERSE
BnaA06g12390D	-1.65279	20.1	stress.biotic	Symbols: ATLP-1 | ATLP-1 | chr1:6276788-6278150 REVERSE
BnaA06g29870D	-1.51235	20.1	stress.biotic	Symbols: RPP8, HRT, RCY1 | RPP8 (RECOGNITION OF PERONOSPORA PARASITICA 8); nucleotide binding | chr5:17462611-17467448 REVERSE
BnaA06g39650D	-1.6458	20.1	stress.biotic	Symbols: RPP8, HRT, RCY1 | RPP8 (RECOGNITION OF PERONOSPORA PARASITICA 8); nucleotide binding | chr5:17462611-17467448 REVERSE
BnaA07g34370D	-5.86137	20.1	stress.biotic	pathogenesis-related family protein | chr1:29621340-29622447 REVERSE
BnaA08g11840D	-2.29023	20.1	stress.biotic	Symbols: ADR1-L1 | ADR1-L1 (ADR1-like 1); ATP binding / protein binding | chr4:16051051-16056526 REVERSE
BnaA08g13270D	-1.74566	20.1	stress.biotic	Symbols: PRHA | PRHA (PATHOGENESIS RELATED HOMEODOMAIN PROTEIN A); protein binding / sequence-specific DNA binding / transcription activator/ transcription factor | chr4:14648139-14653379 REVERSE
BnaA08g23230D	-4.06848	20.1	stress.biotic	Symbols: AtRLP3 | AtRLP3 (Receptor Like Protein 3); protein binding / protein kinase | chr1:5901169-5903439 REVERSE
BnaA08g24820D	-1.9386	20.1	stress.biotic	Symbols: RPS5 | RPS5 (RESISTANT TO P. SYRINGAE 5); nucleotide binding | chr1:4144935-4147817 FORWARD
BnaA08g26400D	-1.78443	20.1	stress.biotic	ATP binding / GTP binding / nucleoside-triphosphatase/ nucleotide binding | chr5:19189411-19192516 FORWARD
BnaA09g09270D	-4.59991	20.1	stress.biotic	Symbols: AtRLP6 | AtRLP6 (Receptor Like Protein 6); protein binding | chr1:17183550-17186534 REVERSE
BnaA09g15440D	-1.21957	20.1	stress.biotic	chitinase, putative | chr2:18081331-18082767 REVERSE
BnaA09g35430D	-4	20.1	stress.biotic	Symbols: AtRLP48 | AtRLP48 (Receptor Like Protein 48); protein binding | chr4:8025804-8028614 FORWARD
BnaA09g46480D	-2.37741	20.1	stress.biotic	Symbols: RFL1 | RFL1 (RPS5-like 1); ATP binding / protein binding | chr1:4140948-4143605 FORWARD
BnaA09g46490D	-2.53114	20.1	stress.biotic	Symbols: RFL1 | RFL1 (RPS5-like 1); ATP binding / protein binding | chr1:4140948-4143605 FORWARD
BnaA10g05680D	-2.4364	20.1	stress.biotic	chitinase, putative | chr2:18081331-18082767 REVERSE
BnaAnng06950D	-3.52901	20.1	stress.biotic	protein kinase family protein | chr5:24752868-24756718 FORWARD
BnaAnng18020D	-3.89447	20.1	stress.biotic	pathogenesis-related thaumatin family protein | chr4:18069601-18071355 REVERSE
BnaAnng30660D	-2.02776	20.1	stress.biotic	harpin-induced family protein / HIN1 family protein / harpin-responsive family protein | chr3:15928160-15929758 FORWARD
BnaAnng41250D	-2.45816	20.1	stress.biotic	thaumatin, putative | chr4:18066177-18068205 REVERSE
BnaC01g04860D	-3.09826	20.1	stress.biotic	Symbols: ADR1-L1 | ADR1-L1 (ADR1-like 1); ATP binding / protein binding | chr4:16051051-16056526 REVERSE
BnaC01g08430D	-1.71898	20.1	stress.biotic	Symbols: PRHA | PRHA (PATHOGENESIS RELATED HOMEODOMAIN PROTEIN A); protein binding / sequence-specific DNA binding / transcription activator/ transcription factor | chr4:14648139-14653379 REVERSE
BnaC01g34430D	-1.57622	20.1	stress.biotic	Symbols: MOS4 | MOS4 (Modifier of snc1,4) | chr3:6223188-6225372 FORWARD
BnaC02g07560D	-1.07133	20.1	stress.biotic	Symbols: CSA1 | CSA1 (constitutive shade-avoidance1); ATP binding / transmembrane receptor | chr5:5908874-5913099 REVERSE
BnaC02g07600D	-1.77761	20.1	stress.biotic	Symbols: DAR4 | DAR4 (DA1-RELATED PROTEIN 4); ATP binding / protein binding / zinc ion binding | chr5:5916970-5923355 FORWARD
BnaC02g23440D	-1.66793	20.1	stress.biotic	pathogenesis-related thaumatin family protein | chr1:28458782-28460854 FORWARD
BnaC03g08330D	-2.71809	20.1	stress.biotic	Symbols: AtRLP21 | AtRLP21 (Receptor Like Protein 21); protein binding | chr2:10838420-10841881 FORWARD
BnaC03g08490D	-2.41602	20.1	stress.biotic	transferase family protein | chr5:5781987-5783706 REVERSE
BnaC03g08650D	-1.56501	20.1	stress.biotic	Symbols: CSA1 | CSA1 (constitutive shade-avoidance1); ATP binding / transmembrane receptor | chr5:5908874-5913099 REVERSE
BnaC03g33880D	-4.07542	20.1	stress.biotic	Symbols: PR4, HEL, PR-4 | PR4 (PATHOGENESIS-RELATED 4); chitin binding | chr3:1285524-1286562 REVERSE
BnaC03g45470D	-3.58708	20.1	stress.biotic	Symbols: PR1, PR 1, ATPR1 | PR1 (PATHOGENESIS-RELATED GENE 1) | chr2:6241704-6242463 REVERSE
BnaC03g60120D	-2.79055	20.1	stress.biotic	thaumatin, putative | chr4:18066177-18068205 REVERSE
BnaC03g63440D	-3.85798	20.1	stress.biotic	glycosyl hydrolase family 18 protein | chr4:10763934-10765753 REVERSE
BnaC03g70520D	-4.1964	20.1	stress.biotic	pathogenesis-related family protein | chr1:29621340-29622447 REVERSE
BnaC04g09720D	-8.6677	20.1	stress.biotic	chitinase, putative | chr2:18081331-18082767 REVERSE
BnaC04g11650D	-5.38933	20.1	stress.biotic	Symbols: AtRLP26 | AtRLP26 (Receptor Like Protein 26); kinase/ protein binding | chr2:14021870-14024398 FORWARD
BnaC05g13990D	-1.80735	20.1	stress.biotic	Symbols: ATLP-1 | ATLP-1 | chr1:6276788-6278150 REVERSE
BnaC05g32870D	-1.49399	20.1	stress.biotic	Symbols: MOS4 | MOS4 (Modifier of snc1,4) | chr3:6223188-6225372 FORWARD
BnaC05g47740D	-2.33998	20.1	stress.biotic	Symbols: CHAT | CHAT (acetyl CoA:(Z)-3-hexen-1-ol acetyltransferase); acetyl CoA:(Z)-3-hexen-1-ol acetyltransferase | chr3:828296-829896 REVERSE
BnaC05g47750D	-3.07049	20.1	stress.biotic	Symbols: CHAT | CHAT (acetyl CoA:(Z)-3-hexen-1-ol acetyltransferase); acetyl CoA:(Z)-3-hexen-1-ol acetyltransferase | chr3:828296-829896 REVERSE
BnaC06g07830D	-1.85307	20.1	stress.biotic	avirulence-responsive protein, putative / avirulence induced gene protein, putative / AIG protein, putative | chr1:12349463-12351203 REVERSE
BnaC06g39200D	-4.10154	20.1	stress.biotic	pathogenesis-related family protein | chr1:29621340-29622447 REVERSE
BnaC06g40790D	-6.20945	20.1	stress.biotic	Symbols: RPS5 | RPS5 (RESISTANT TO P. SYRINGAE 5); nucleotide binding | chr1:4144935-4147817 FORWARD
BnaC06g41400D	-6.98489	20.1	stress.biotic	Symbols: RPS5 | RPS5 (RESISTANT TO P. SYRINGAE 5); nucleotide binding | chr1:4144935-4147817 FORWARD
BnaC08g17270D	-3.59296	20.1	stress.biotic	Symbols: AtRLP3 | AtRLP3 (Receptor Like Protein 3); protein binding / protein kinase | chr1:5901169-5903439 REVERSE
BnaC08g20430D	-5.73157	20.1	stress.biotic	transferase family protein | chr3:18046323-18049463 FORWARD
BnaC08g23660D	-2.65885	20.1	stress.biotic	Symbols: PAD4, ATPAD4 | PAD4 (PHYTOALEXIN DEFICIENT 4); lipase/ protein binding / triacylglycerol lipase | chr3:19431371-19434403 FORWARD
BnaC08g25190D	-8.46489	20.1	stress.biotic	Symbols: ATEP3, ATCHITIV, CHIV | ATEP3; chitinase | chr3:20145910-20147063 FORWARD
BnaC08g26810D	-2.0608	20.1	stress.biotic	Symbols: AtRLP48 | AtRLP48 (Receptor Like Protein 48); protein binding | chr4:8025804-8028614 FORWARD
BnaC08g40550D	-3.23929	20.1	stress.biotic	Symbols: RFL1 | RFL1 (RPS5-like 1); ATP binding / protein binding | chr1:4140948-4143605 FORWARD
BnaCnng12090D	-2.35487	20.1	stress.biotic	lipase class 3 family protein / disease resistance protein-related | chr3:17752938-17755190 REVERSE
BnaCnng17400D	-2.11548	20.1	stress.biotic	pathogenesis-related protein, putative | chr4:13121068-13121955 FORWARD
BnaCnng23350D	-3.91075	20.1	stress.biotic	pathogenesis-related thaumatin family protein | chr4:18069601-18071355 REVERSE
BnaCnng43870D	-1.53926	20.1	stress.biotic	Symbols: ATDAD1 | ATDAD1 (DEFENDER AGAINST APOPTOTIC DEATH 1) | chr1:11605857-11607768 REVERSE
BnaCnng54590D	-1.13645	20.1	stress.biotic	Symbols: PAD4, ATPAD4 | PAD4 (PHYTOALEXIN DEFICIENT 4); lipase/ protein binding / triacylglycerol lipase | chr3:19431371-19434403 FORWARD
BnaCnng60400D	-3.33403	20.1	stress.biotic	protein kinase family protein | chr5:24752868-24756718 FORWARD
BnaCnng60470D	-9.28386	20.1	stress.biotic	avirulence-responsive family protein / avirulence induced gene (AIG1) family protein | chr1:12333046-12339182 REVERSE
BnaCnng63440D	-1.73964	20.1	stress.biotic	Symbols: ADR1-L1 | ADR1-L1 (ADR1-like 1); ATP binding / protein binding | chr4:16051051-16056526 REVERSE
BnaC03g62180D	1.37838	20.1	stress.biotic	Symbols: BTI1 | BTI1 (VIRB2-INTERACTING PROTEIN 1) | chr4:12317059-12319937 FORWARD
BnaA08g15040D	1.41534	20.1	stress.biotic	Symbols: BTI1 | BTI1 (VIRB2-INTERACTING PROTEIN 1) | chr4:12317059-12319937 FORWARD
BnaC07g43230D	1.53739	20.1	stress.biotic	avirulence-responsive protein-related / avirulence induced gene (AIG) protein-related | chr4:15191325-15192596 FORWARD
BnaC01g25570D	1.60227	20.1	stress.biotic	lipase class 3 family protein / disease resistance protein-related | chr3:17752938-17755190 REVERSE
BnaA06g34320D	1.78658	20.1	stress.biotic	Symbols: LCR69, PDF2.2 | LCR69 (LOW-MOLECULAR-WEIGHT CYSTEINE-RICH 69); peptidase inhibitor | chr2:528350-529108 FORWARD
BnaAnng07130D	1.8461	20.1	stress.biotic	Symbols: ATBI-1, BI-1, ATBI1 | ATBI1 (BAX INHIBITOR 1) | chr5:19136023-19137942 FORWARD
BnaC01g28360D	1.8725	20.1	stress.biotic	Symbols: CW9 | CW9; ATP binding | chr1:21902284-21905685 FORWARD
BnaC09g20030D	1.94869	20.1	stress.biotic	Symbols: ATBI-1, BI-1, ATBI1 | ATBI1 (BAX INHIBITOR 1) | chr5:19136023-19137942 FORWARD
BnaC02g17410D	2.04873	20.1	stress.biotic	thionin, putative | chr1:24605671-24606537 REVERSE
BnaUnng00890D	2.04873	20.1	stress.biotic	thionin, putative | chr1:24605671-24606537 REVERSE
BnaA03g46130D	2.17076	20.1	stress.biotic	Symbols: BTI1 | BTI1 (VIRB2-INTERACTING PROTEIN 1) | chr4:12317059-12319937 FORWARD
BnaA04g09560D	2.5449	20.1	stress.biotic	Symbols: AIG2L | AIG2L (AVIRULENCE INDUCED GENE 2 LIKE PROTEIN) | chr5:15899646-15900653 FORWARD
BnaA01g19180D	2.84698	20.1	stress.biotic	Symbols: AtRLP48 | AtRLP48 (Receptor Like Protein 48); protein binding | chr4:8025804-8028614 FORWARD
BnaC09g41970D	3.13409	20.1	stress.biotic	glycosyl hydrolase family 81 protein | chr5:5182641-5184878 REVERSE
BnaA01g19190D	3.51307	20.1	stress.biotic	Symbols: AtRLP48 | AtRLP48 (Receptor Like Protein 48); protein binding | chr4:8025804-8028614 FORWARD
BnaA08g14830D	4.31751	20.1	stress.biotic	pathogenesis-related thaumatin family protein | chr4:17039192-17041141 REVERSE
BnaC01g02610D	5.25316	20.1	stress.biotic	pathogenesis-related thaumatin family protein | chr4:17039192-17041141 REVERSE
BnaC03g76850D	5.78648	20.1	stress.biotic	pathogenesis-related thaumatin family protein | chr4:17039192-17041141 REVERSE
BnaC03g24360D	6.51092	20.1	stress.biotic	chitinase, putative | chr2:18093770-18095025 REVERSE
BnaA03g20340D	6.78389	20.1	stress.biotic	chitinase, putative | chr2:18093770-18095025 REVERSE
BnaA01g01570D	6.8601	20.1	stress.biotic	pathogenesis-related thaumatin family protein | chr4:17039192-17041141 REVERSE
BnaA05g03430D	10.0544	20.1	stress.biotic	chitinase, putative | chr2:18093770-18095025 REVERSE
BnaA01g09240D	-3.34239	20.1	stress.biotic	Symbols: SNI1 | SNI1; transcription repressor | chr4:10192909-10195662 FORWARD
BnaA01g20340D	1.34634	20.1	stress.biotic	lipase class 3 family protein / disease resistance protein-related | chr3:17752938-17755190 REVERSE
BnaA01g20350D	-2.18203	20.1	stress.biotic	lipase class 3 family protein / disease resistance protein-related | chr3:17752938-17755190 REVERSE
BnaA01g21960D	2.63826	20.1	stress.biotic	Symbols: CW9 | CW9; ATP binding | chr1:21902284-21905685 FORWARD
BnaA01g36770D	1.99302	20.1	stress.biotic	Symbols: NDR1 | NDR1 (non race-specific disease resistance 1); signal transducer | chr3:7194846-7195736 FORWARD
BnaA02g32400D	3.08246	20.1	stress.biotic	thaumatin-like protein, putative | chr5:8430768-8432414 FORWARD
BnaA02g32660D	-3.02975	20.1	stress.biotic	Symbols: CW9 | CW9; ATP binding | chr1:21902284-21905685 FORWARD
BnaA03g20310D	-1.06507	20.1	stress.biotic	chitinase, putative | chr2:18081331-18082767 REVERSE
BnaA03g28150D	4.66297	20.1	stress.biotic	immediate-early fungal elicitor family protein | chr3:618409-619686 FORWARD
BnaA03g28760D	-1.48266	20.1	stress.biotic	Symbols: PR4, HEL, PR-4 | PR4 (PATHOGENESIS-RELATED 4); chitin binding | chr3:1285524-1286562 REVERSE
BnaA03g28770D	-1.82916	20.1	stress.biotic	Symbols: PR4, HEL, PR-4 | PR4 (PATHOGENESIS-RELATED 4); chitin binding | chr3:1285524-1286562 REVERSE
BnaA03g31570D	-3.43214	20.1	stress.biotic	thionin, putative | chr1:24605671-24606537 REVERSE
BnaA04g06550D	-3.80735	20.1	stress.biotic	Symbols: AtRLP48 | AtRLP48 (Receptor Like Protein 48); protein binding | chr4:8025804-8028614 FORWARD
BnaA04g06580D	-1.54956	20.1	stress.biotic	Symbols: AtRLP48 | AtRLP48 (Receptor Like Protein 48); protein binding | chr4:8025804-8028614 FORWARD
BnaA04g14880D	3.7866	20.1	stress.biotic	Symbols: AtRLP21 | AtRLP21 (Receptor Like Protein 21); protein binding | chr2:10838420-10841881 FORWARD
BnaA05g07590D	-1.97533	20.1	stress.biotic	Symbols: DOGT1, UGT73C5 | DOGT1 (DON-GLUCOSYLTRANSFERASE 1); UDP-glycosyltransferase/ cis-zeatin O-beta-D-glucosyltransferase/ glucosyltransferase/ quercetin 4'-O-glucosyltransferase/ quercetin 7-O-glucosyltransferase/ trans-zeatin O-beta-D-glucosyltransferase/ transferase, transf | chr2:15423380-15425016 REVERSE
BnaA05g07900D	-2.2131	20.1	stress.biotic	Symbols: RPP8, HRT, RCY1 | RPP8 (RECOGNITION OF PERONOSPORA PARASITICA 8); nucleotide binding | chr5:17462611-17467448 REVERSE
BnaA06g16340D	-1.32431	20.1	stress.biotic	transferase family protein | chr3:18046323-18049463 FORWARD
BnaA06g31170D	-1.84568	20.1	stress.biotic	avirulence-responsive protein, putative / avirulence induced gene (AIG) protein, putative | chr3:10968100-10969387 REVERSE
BnaA07g02360D	-9.29921	20.1	stress.biotic	pathogenesis-related thaumatin family protein | chr4:18069601-18071355 REVERSE
BnaA08g09330D	-3.0569	20.1	stress.biotic	glycosyl hydrolase family 18 protein | chr4:10763934-10765753 REVERSE
BnaA08g30830D	-1.94578	20.1	stress.biotic	pathogenesis-related protein, putative | chr4:13121068-13121955 FORWARD
BnaA09g02670D	-1.2486	20.1	stress.biotic	Symbols: CW9 | CW9; ATP binding | chr1:21902284-21905685 FORWARD
BnaA09g19050D	1.52138	20.1	stress.biotic	Symbols: TOM3 | TOM3; protein binding | chr2:560864-563233 FORWARD
BnaA09g23480D	-1.15101	20.1	stress.biotic	avirulence-responsive protein, putative / avirulence induced gene protein, putative / AIG protein, putative | chr1:12349463-12351203 REVERSE
BnaA09g24380D	-1.69601	20.1	stress.biotic	Symbols: TOM2B, TTM1 | TOM2B (TOBAMOVIRUS MULTIPLICATION 2B) | chr1:11676962-11678449 FORWARD
BnaA09g32860D	-3.44022	20.1	stress.biotic	Symbols: PAD4, ATPAD4 | PAD4 (PHYTOALEXIN DEFICIENT 4); lipase/ protein binding / triacylglycerol lipase | chr3:19431371-19434403 FORWARD
BnaA09g44230D	-1.79188	20.1	stress.biotic	pathogenesis-related thaumatin family protein | chr1:6679281-6680252 FORWARD
BnaA09g47230D	-4.15843	20.1	stress.biotic	Symbols: RFL1 | RFL1 (RPS5-like 1); ATP binding / protein binding | chr1:4140948-4143605 FORWARD
BnaA10g00070D	-1.18728	20.1	stress.biotic	Symbols: VAD1 | VAD1 (VASCULAR ASSOCIATED DEATH1) | chr1:395761-399897 FORWARD
BnaA10g13140D	-6.73697	20.1	stress.biotic	Symbols: RPS5 | RPS5 (RESISTANT TO P. SYRINGAE 5); nucleotide binding | chr1:4144935-4147817 FORWARD
BnaA10g18410D	2.82239	20.1	stress.biotic	glycosyl hydrolase family 81 protein | chr5:5182641-5184878 REVERSE
BnaC01g00120D	-1.89148	20.1	stress.biotic	Symbols: EDS5, SID1 | EDS5 (ENHANCED DISEASE SUSCEPTIBILITY 5); antiporter/ multidrug efflux pump/ transporter | chr4:18185667-18189224 FORWARD
BnaC01g01800D	-2.03982	20.1	stress.biotic	Symbols: ACD2, ATRCCR | ACD2 (ACCELERATED CELL DEATH 2); red chlorophyll catabolite reductase | chr4:17442612-17443855 FORWARD
BnaC01g10840D	-3.10852	20.1	stress.biotic	Symbols: SNI1 | SNI1; transcription repressor | chr4:10192909-10195662 FORWARD
BnaC02g47680D	-1.43058	20.1	stress.biotic	Symbols: PDF2.3, LCR68 | LCR68 (LOW-MOLECULAR-WEIGHT CYSTEINE-RICH 68); peptidase inhibitor | chr2:539999-540634 FORWARD
BnaC02g48740D	-1.99831	20.1	stress.biotic	Symbols: CW9 | CW9; ATP binding | chr1:21902284-21905685 FORWARD
BnaC03g02540D	1.8039	20.1	stress.biotic	Symbols: NHL3 | NHL3 | chr5:1930793-1931768 REVERSE
BnaC03g10490D	-1.14619	20.1	stress.biotic	Symbols: ATDAD1 | ATDAD1 (DEFENDER AGAINST APOPTOTIC DEATH 1) | chr1:11605857-11607768 REVERSE
BnaC03g24290D	-1.61855	20.1	stress.biotic	chitinase, putative | chr2:18081331-18082767 REVERSE
BnaC03g33180D	4.87992	20.1	stress.biotic	immediate-early fungal elicitor family protein | chr3:618409-619686 FORWARD
BnaC03g41540D	-2.78932	20.1	stress.biotic	Symbols: AtRLP43 | AtRLP43 (Receptor Like Protein 43); kinase/ protein binding | chr3:10895977-10898841 REVERSE
BnaC03g54950D	-2.03442	20.1	stress.biotic	harpin-induced family protein / HIN1 family protein / harpin-responsive family protein | chr3:15928160-15929758 FORWARD
BnaC04g08440D	-1.58999	20.1	stress.biotic	Symbols: DOGT1, UGT73C5 | DOGT1 (DON-GLUCOSYLTRANSFERASE 1); UDP-glycosyltransferase/ cis-zeatin O-beta-D-glucosyltransferase/ glucosyltransferase/ quercetin 4'-O-glucosyltransferase/ quercetin 7-O-glucosyltransferase/ trans-zeatin O-beta-D-glucosyltransferase/ transferase, transf | chr2:15423380-15425016 REVERSE
BnaC04g08450D	-2.18088	20.1	stress.biotic	Symbols: DOGT1, UGT73C5 | DOGT1 (DON-GLUCOSYLTRANSFERASE 1); UDP-glycosyltransferase/ cis-zeatin O-beta-D-glucosyltransferase/ glucosyltransferase/ quercetin 4'-O-glucosyltransferase/ quercetin 7-O-glucosyltransferase/ trans-zeatin O-beta-D-glucosyltransferase/ transferase, transf | chr2:15423380-15425016 REVERSE
BnaC04g08930D	-1.52534	20.1	stress.biotic	Symbols: RPP8, HRT, RCY1 | RPP8 (RECOGNITION OF PERONOSPORA PARASITICA 8); nucleotide binding | chr5:17462611-17467448 REVERSE
BnaC04g31990D	-4.25873	20.1	stress.biotic	pathogenesis-related thaumatin family protein | chr5:16022753-16024316 REVERSE
BnaC04g32140D	4.42931	20.1	stress.biotic	ATP binding / nucleoside-triphosphatase/ nucleotide binding / transmembrane receptor | chr5:16041919-16043494 REVERSE
BnaC04g37740D	7.51833	20.1	stress.biotic	protein binding | chr5:19980195-19983869 FORWARD
BnaC04g45990D	-3.03395	20.1	stress.biotic	protease inhibitor, putative | chr2:16236381-16237280 REVERSE
BnaC04g53030D	-1.34564	20.1	stress.biotic	chitinase, putative | chr2:18076224-18077463 REVERSE
BnaC04g55830D	1.03341	20.1	stress.biotic	Symbols: AIG2L | AIG2L (AVIRULENCE INDUCED GENE 2 LIKE PROTEIN) | chr5:15899646-15900653 FORWARD
BnaC05g00080D	-1.12945	20.1	stress.biotic	Symbols: VAD1 | VAD1 (VASCULAR ASSOCIATED DEATH1) | chr1:395761-399897 FORWARD
BnaC05g14950D	-2.14802	20.1	stress.biotic	pathogenesis-related thaumatin family protein | chr1:6679281-6680252 FORWARD
BnaC05g24520D	-1.45701	20.1	stress.biotic	Symbols: TOM2B, TTM1 | TOM2B (TOBAMOVIRUS MULTIPLICATION 2B) | chr1:11676962-11678449 FORWARD
BnaC06g36470D	1.68866	20.1	stress.biotic	pathogenesis-related thaumatin family protein | chr1:28458782-28460854 FORWARD
BnaC08g49380D	-1.10274	20.1	stress.biotic	pathogenesis-related thaumatin family protein | chr1:6679281-6680252 FORWARD
BnaC09g11830D	-1.30228	20.1	stress.biotic	FUNCTIONS IN: molecular_function unknown; INVOLVED IN: biological_process unknown; EXPRESSED IN: sperm cell, male gametophyte, pollen tube; EXPRESSED DURING: L mature pollen stage, M germinated pollen stage; BEST Arabidopsis thaliana protein match is: loricrin-related (TAIR:AT5G64550.1); Has 2298 Blast hits to 1429 proteins in 121 species: Archae - 0; Bacteria - 42; Metazoa - 1626; Fungi - 29; Pl…
BnaC09g16770D	-6.26053	20.1	stress.biotic	binding / ubiquitin-protein ligase | chr5:16927910-16930472 REVERSE
BnaC09g20700D	1.27468	20.1	stress.biotic	Symbols: TOM3 | TOM3; protein binding | chr2:560864-563233 FORWARD
BnaUnng03220D	-4.14234	20.1	stress.biotic	Symbols: PAD4, ATPAD4 | PAD4 (PHYTOALEXIN DEFICIENT 4); lipase/ protein binding / triacylglycerol lipase | chr3:19431371-19434403 FORWARD
BnaA04g14490D	-2.68551	20.2	stress.abiotic	unknown protein | chr2:10427856-10429222 REVERSE
BnaAnng27980D	-4.37779	20.2	stress.abiotic	unknown protein | chr2:10427856-10429222 REVERSE
BnaC01g41460D	-1.72594	20.2	stress.abiotic	Symbols: ATOSM34 | ATOSM34 (osmotin 34) | chr4:7024856-7026146 REVERSE
BnaC02g45010D	-1.38904	20.2	stress.abiotic	Symbols: ATBAG1 | ATBAG1 (ARABIDOPSIS THALIANA BCL-2-ASSOCIATED ATHANOGENE 1); protein binding | chr5:21152214-21154244 REVERSE
BnaC04g40020D	-2.81173	20.2	stress.abiotic	osmotin-like protein, putative | chr2:12354430-12355431 REVERSE
BnaC08g33910D	-4.33411	20.2	stress.abiotic	unknown protein | chr2:10427856-10429222 REVERSE
BnaA06g23870D	1.01249	20.2	stress.abiotic	Symbols: ATATH13, ATH13, ATOSA1, OSA1 | ATATH13; transporter | chr5:25948973-25953822 FORWARD
BnaC09g48390D	1.11594	20.2	stress.abiotic	Symbols: ATBAG3 | ATBAG3 (ARABIDOPSIS THALIANA BCL-2-ASSOCIATED ATHANOGENE 3); protein binding | chr5:2265256-2266967 REVERSE
BnaA03g12820D	1.12876	20.2	stress.abiotic	Symbols: ATBAG1 | ATBAG1 (ARABIDOPSIS THALIANA BCL-2-ASSOCIATED ATHANOGENE 1); protein binding | chr5:21152214-21154244 REVERSE
BnaA06g20710D	1.13866	20.2	stress.abiotic	apolipoprotein D-related | chr3:17656670-17658316 REVERSE
BnaCnng57590D	1.4016	20.2	stress.abiotic	Symbols: ATBAG1 | ATBAG1 (ARABIDOPSIS THALIANA BCL-2-ASSOCIATED ATHANOGENE 1); protein binding | chr5:21152214-21154244 REVERSE
BnaA02g04730D	3.50805	20.2	stress.abiotic	Symbols: ATSPX1, SPX1 | SPX1 (SPX DOMAIN GENE 1) | chr5:6802372-6803625 FORWARD
BnaA01g28630D	1.47675	20.2	stress.abiotic	Symbols: UVR3 | UVR3 (UV REPAIR DEFECTIVE 3); DNA (6-4) photolyase | chr3:5293306-5296592 REVERSE
BnaA03g07930D	2.31928	20.2	stress.abiotic	Symbols: ATSPX1, SPX1 | SPX1 (SPX DOMAIN GENE 1) | chr5:6802372-6803625 FORWARD
BnaA04g26060D	3.34239	20.2	stress.abiotic	Symbols: ATSPX3, SPX3 | SPX3 (SPX DOMAIN GENE 3) | chr2:18606410-18607853 FORWARD
BnaA05g00220D	2.06365	20.2	stress.abiotic	benzodiazepine receptor-related | chr2:19568464-19569507 FORWARD
BnaA08g10040D	-4.70966	20.2	stress.abiotic	Symbols: ATMSRB9 | methionine sulfoxide reductase domain-containing protein / SeIR domain-containing protein | chr4:11591116-11592238 REVERSE
BnaA09g56270D	1.05733	20.2	stress.abiotic	Per1-like family protein | chr1:5668413-5670708 FORWARD
BnaC03g64610D	-3.50913	20.2	stress.abiotic	Symbols: ATMSRB9 | methionine sulfoxide reductase domain-containing protein / SeIR domain-containing protein | chr4:11591116-11592238 REVERSE
BnaC09g00970D	2.20288	20.2	stress.abiotic	Symbols: EDA35 | EDA35 (embryo sac development arrest 35) | chr4:2757214-2758275 FORWARD
BnaA03g31070D	-1.68806	21.1	redox.thioredoxin	Symbols: ATH9 | ATH9 (thioredoxin H-type 9) | chr3:2645195-2646497 FORWARD
BnaA03g40200D	-3.80735	21.1	redox.thioredoxin	Symbols: ACHT5 | ACHT5 (ATYPICAL CYS HIS RICH THIOREDOXIN 5) | chr5:24707500-24708893 FORWARD
BnaA03g46730D	-1.73572	21.1	redox.thioredoxin	thioredoxin family protein | chr1:2379647-2381362 FORWARD
BnaA03g55720D	-1.21918	21.1	redox.thioredoxin	Symbols: FTRA2 | FTRA2 (ferredoxin/thioredoxin reductase subunit A (variable subunit) 2); catalytic/ ferredoxin reductase/ ferredoxin:thioredoxin reductase/ lipoate synthase | chr5:2709848-2710583 REVERSE
BnaA03g57160D	-2.08004	21.1	redox.thioredoxin	Symbols: ATHM2 | ATHM2; enzyme activator | chr4:1562359-1564192 REVERSE
BnaA04g26100D	-1.06026	21.1	redox.thioredoxin	Symbols: ATTRX2, ATH2, ATTRXH2, TRXH2 | ATTRX2 (THIOREDOXIN 2); oxidoreductase, acting on sulfur group of donors, disulfide as acceptor | chr5:15990687-15991931 REVERSE
BnaA05g22350D	-1.10491	21.1	redox.thioredoxin	Symbols: HIP, ATTDX, ATHIP2 | ATTDX (TETRATICOPEPTIDE DOMAIN-CONTAINING THIOREDOXIN); oxidoreductase, acting on sulfur group of donors, disulfide as acceptor / protein binding | chr3:6123409-6126281 FORWARD
BnaA05g24170D	-1.74198	21.1	redox.thioredoxin	Symbols: ATHM4, TRX-M4, ATM4 | TRX-M4 (ARABIDOPSIS THIOREDOXIN M-TYPE 4); enzyme activator | chr3:5188374-5189697 FORWARD
BnaA07g32300D	-1.56462	21.1	redox.thioredoxin	Symbols: ATCDSP32, CDSP32 | CDSP32 (CHLOROPLASTIC DROUGHT-INDUCED STRESS PROTEIN OF 32 KD) | chr1:28547786-28549419 REVERSE
BnaA10g09070D	-1.3361	21.1	redox.thioredoxin	Symbols: Aty2 | Aty2 (Arabidopsis thioredoxin y2); electron carrier/ protein disulfide oxidoreductase | chr1:16398099-16399878 REVERSE
BnaA10g24270D	-2.57631	21.1	redox.thioredoxin	Symbols: WCRKC1 | WCRKC1 (WCRKC THIOREDOXIN 1) | chr5:2060503-2061956 REVERSE
BnaA10g25960D	-1.88476	21.1	redox.thioredoxin	Symbols: WCRKC2 | WCRKC2 (WCRKC THIOREDOXIN 2) | chr5:1178644-1180036 REVERSE
BnaAnng12670D	-1.30927	21.1	redox.thioredoxin	Symbols: TRXF1, ATF1 | TRXF1 (THIOREDOXIN F-TYPE 1); enzyme activator | chr3:588408-589685 REVERSE
BnaC01g25910D	-1.43594	21.1	redox.thioredoxin	Symbols: ATHM3, ATM3 | thioredoxin M-type 3, chloroplast (TRX-M3) | chr2:6791290-6792933 REVERSE
BnaC03g03570D	-1.77695	21.1	redox.thioredoxin	Symbols: FTRA2 | FTRA2 (ferredoxin/thioredoxin reductase subunit A (variable subunit) 2); catalytic/ ferredoxin reductase/ ferredoxin:thioredoxin reductase/ lipoate synthase | chr5:2709848-2710583 REVERSE
BnaC03g39090D	-9.77588	21.1	redox.thioredoxin	Symbols: ATHM4, TRX-M4, ATM4 | TRX-M4 (ARABIDOPSIS THIOREDOXIN M-TYPE 4); enzyme activator | chr3:5188374-5189697 FORWARD
BnaC04g56890D	-1.14729	21.1	redox.thioredoxin	Symbols: ATTRX2, ATH2, ATTRXH2, TRXH2 | ATTRX2 (THIOREDOXIN 2); oxidoreductase, acting on sulfur group of donors, disulfide as acceptor | chr5:15990687-15991931 REVERSE
BnaC05g35600D	-1.21465	21.1	redox.thioredoxin	Symbols: HIP, ATTDX, ATHIP2 | ATTDX (TETRATICOPEPTIDE DOMAIN-CONTAINING THIOREDOXIN); oxidoreductase, acting on sulfur group of donors, disulfide as acceptor / protein binding | chr3:6123409-6126281 FORWARD
BnaC06g37580D	-1.69363	21.1	redox.thioredoxin	Symbols: ATY1, TRX-Y1 | ATY1 (ARABIDOPSIS THIOREDOXIN Y1); electron carrier/ protein disulfide oxidoreductase | chr1:28811685-28813070 REVERSE
BnaC07g49920D	-7.71425	21.1	redox.thioredoxin	Symbols: ACHT5 | ACHT5 (ATYPICAL CYS HIS RICH THIOREDOXIN 5) | chr5:24707500-24708893 FORWARD
BnaC09g48890D	-2.83061	21.1	redox.thioredoxin	Symbols: WCRKC1 | WCRKC1 (WCRKC THIOREDOXIN 1) | chr5:2060503-2061956 REVERSE
BnaCnng10220D	-1.58062	21.1	redox.thioredoxin	Symbols: WCRKC2 | WCRKC2 (WCRKC THIOREDOXIN 2) | chr5:1178644-1180036 REVERSE
BnaCnng16050D	-2.42768	21.1	redox.thioredoxin	Symbols: ATHM1, TRX-M1, ATM1 | ATHM1; enzyme activator | chr1:916819-918064 REVERSE
BnaCnng27720D	-1.08393	21.1	redox.thioredoxin	Symbols: ATAPRL4 | ATAPRL4 (APR-like 4) | chr1:12748571-12750383 REVERSE
BnaA03g06900D	1.22471	21.1	redox.thioredoxin	Symbols: ATAPRL7 | ATAPRL7 (APR-like 7) | chr5:5990956-5993936 FORWARD
BnaA09g16230D	1.58539	21.1	redox.thioredoxin	Symbols: ATTRX3, ATH3, ATTRXH3, TRXH3 | ATTRX3 (THIOREDOXIN 3); oxidoreductase, acting on sulfur group of donors, disulfide as acceptor | chr5:17242607-17243912 FORWARD
BnaC09g17310D	1.74971	21.1	redox.thioredoxin	Symbols: ATTRX3, ATH3, ATTRXH3, TRXH3 | ATTRX3 (THIOREDOXIN 3); oxidoreductase, acting on sulfur group of donors, disulfide as acceptor | chr5:17242607-17243912 FORWARD
BnaA08g04320D	1.93904	21.1	redox.thioredoxin	Symbols: ATTRX5, ATH5, LIV1 | ATTRX5; oxidoreductase, acting on sulfur group of donors, disulfide as acceptor | chr1:17074942-17076330 REVERSE
BnaA09g14480D	2.14728	21.1	redox.thioredoxin	Symbols: ATH7 | ATH7 (thioredoxin H-type 7) | chr1:21952634-21953456 REVERSE
BnaA06g04960D	2.16694	21.1	redox.thioredoxin	Symbols: ACHT4 | ACHT4 (ATYPICAL CYS HIS RICH THIOREDOXIN 4); oxidoreductase, acting on sulfur group of donors, disulfide as acceptor | chr1:2712892-2714734 FORWARD
BnaC08g43100D	3.049	21.1	redox.thioredoxin	Symbols: ACHT4 | ACHT4 (ATYPICAL CYS HIS RICH THIOREDOXIN 4); oxidoreductase, acting on sulfur group of donors, disulfide as acceptor | chr1:2712892-2714734 FORWARD
BnaA09g48840D	3.78569	21.1	redox.thioredoxin	Symbols: ACHT4 | ACHT4 (ATYPICAL CYS HIS RICH THIOREDOXIN 4); oxidoreductase, acting on sulfur group of donors, disulfide as acceptor | chr1:2712892-2714734 FORWARD
BnaA01g15360D	-1.94081	21.1	redox.thioredoxin	Symbols: ACHT1 | ACHT1 (ATYPICAL CYS HIS RICH THIOREDOXIN 1); oxidoreductase, acting on sulfur group of donors, disulfide as acceptor | chr4:13255251-13256760 FORWARD
BnaA05g14560D	-2.06413	21.1	redox.thioredoxin	Symbols: TTL1 | TTL1 (TETRATRICOPETIDE-REPEAT THIOREDOXIN-LIKE 1); binding | chr1:19879422-19882375 FORWARD
BnaA05g15540D	-2.64599	21.1	redox.thioredoxin	thioredoxin-related | chr1:18880320-18884225 FORWARD
BnaA05g18330D	-1.95705	21.1	redox.thioredoxin	Symbols: ATAPRL4 | ATAPRL4 (APR-like 4) | chr1:12748571-12750383 REVERSE
BnaA06g02880D	-1.11335	21.1	redox.thioredoxin	Symbols: ATHX, ATX | ATHX; enzyme activator | chr1:18638384-18639536 REVERSE
BnaA06g13900D	-1.24551	21.1	redox.thioredoxin	Symbols: ATTRX4, ATH4 | ATTRX4; oxidoreductase, acting on sulfur group of donors, disulfide as acceptor | chr1:6822864-6824071 REVERSE
BnaA07g04200D	-2.06699	21.1	redox.thioredoxin	Symbols: ATHM3, ATM3 | thioredoxin M-type 3, chloroplast (TRX-M3) | chr2:6791290-6792933 REVERSE
BnaA07g16020D	-4.87447	21.1	redox.thioredoxin	thioredoxin family protein | chr3:19721994-19722702 FORWARD
BnaA09g01610D	-1.40769	21.1	redox.thioredoxin	Symbols: ATHM2 | ATHM2; enzyme activator | chr4:1562359-1564192 REVERSE
BnaA09g31630D	-1.41666	21.1	redox.thioredoxin	Symbols: PLP3b | PLP3b (Phosducin-like protein 3 homolog); beta-tubulin binding | chr5:26519770-26521696 FORWARD
BnaA09g50890D	-1.18988	21.1	redox.thioredoxin	Symbols: ATHM1, TRX-M1, ATM1 | ATHM1; enzyme activator | chr1:916819-918064 REVERSE
BnaA10g30400D	-1.8225	21.1	redox.thioredoxin	thioredoxin-related | chr5:1963072-1964314 REVERSE
BnaC02g41630D	-1.25346	21.1	redox.thioredoxin	Symbols: FTRA1 | FTRA1 (ferredoxin/thioredoxin reductase subunit A (variable subunit) 1); catalytic/ ferredoxin reductase/ ferredoxin:thioredoxin reductase/ lipoate synthase | chr5:7903045-7903845 REVERSE
BnaC03g36400D	-1.18806	21.1	redox.thioredoxin	Symbols: ATH9 | ATH9 (thioredoxin H-type 9) | chr3:2645195-2646497 FORWARD
BnaC05g15320D	-1.14694	21.1	redox.thioredoxin	Symbols: ATTRX4, ATH4 | ATTRX4; oxidoreductase, acting on sulfur group of donors, disulfide as acceptor | chr1:6822864-6824071 REVERSE
BnaC05g38210D	-1.19203	21.1	redox.thioredoxin	Symbols: ATHM4, TRX-M4, ATM4 | TRX-M4 (ARABIDOPSIS THIOREDOXIN M-TYPE 4); enzyme activator | chr3:5188374-5189697 FORWARD
BnaC06g14480D	-1.72498	21.1	redox.thioredoxin	thioredoxin family protein | chr3:19721994-19722702 FORWARD
BnaC06g36750D	-1.11806	21.1	redox.thioredoxin	Symbols: ATCDSP32, CDSP32 | CDSP32 (CHLOROPLASTIC DROUGHT-INDUCED STRESS PROTEIN OF 32 KD) | chr1:28547786-28549419 REVERSE
BnaC07g38920D	-1.41409	21.1	redox.thioredoxin	thioredoxin family protein | chr1:2379647-2381362 FORWARD
BnaA01g22540D	-2.5095	21.2	redox.ascorbate and glutathione	Symbols: B5 #5, ATCB5LP, CB5LP | CB5LP (CYTOCHROME B5-LIKE PROTEIN); heme binding | chr1:22342414-22343014 REVERSE
BnaA03g15050D	-4.99435	21.2	redox.ascorbate and glutathione	Symbols: B5 #4, ATCB5-B, CB5-B | CB5-B (CYTOCHROME B5 ISOFORM B); heme binding | chr2:13876774-13878531 REVERSE
BnaA03g20200D	-2.33513	21.2	redox.ascorbate and glutathione	Symbols: ATGPX3 | ATGPX3 (GLUTATHIONE PEROXIDASE 3); glutathione peroxidase | chr2:18008642-18010600 REVERSE
BnaA04g19010D	-3.20739	21.2	redox.ascorbate and glutathione	Symbols: B5 #4, ATCB5-B, CB5-B | CB5-B (CYTOCHROME B5 ISOFORM B); heme binding | chr2:13876774-13878531 REVERSE
BnaA04g27110D	-1.44205	21.2	redox.ascorbate and glutathione	Symbols: B5 #1, ATCB5-C, CB5-C | CB5-C (CYTOCHROME B5 ISOFORM C); heme binding | chr2:19151646-19152600 FORWARD
BnaA08g19560D	-3.35755	21.2	redox.ascorbate and glutathione	cytochrome B561 family protein | chr1:9022542-9024081 REVERSE
BnaA09g49820D	-2.37853	21.2	redox.ascorbate and glutathione	2-oxoglutarate-dependent dioxygenase, putative | chr1:2035839-2037366 FORWARD
BnaA09g49830D	-2.99425	21.2	redox.ascorbate and glutathione	2-oxoglutarate-dependent dioxygenase, putative | chr1:2035839-2037366 FORWARD
BnaA10g04330D	-1.31294	21.2	redox.ascorbate and glutathione	2-oxoglutarate-dependent dioxygenase, putative | chr1:2025601-2027271 FORWARD
BnaA10g04340D	-7.29155	21.2	redox.ascorbate and glutathione	2-oxoglutarate-dependent dioxygenase, putative | chr1:2035839-2037366 FORWARD
BnaAnng16110D	-2.28876	21.2	redox.ascorbate and glutathione	Symbols: B5 #4, ATCB5-B, CB5-B | CB5-B (CYTOCHROME B5 ISOFORM B); heme binding | chr2:13876774-13878531 REVERSE
BnaAnng41830D	-2.45833	21.2	redox.ascorbate and glutathione	2-oxoglutarate-dependent dioxygenase, putative | chr1:2032338-2034018 FORWARD
BnaC03g24130D	-1.67874	21.2	redox.ascorbate and glutathione	Symbols: ATGPX3 | ATGPX3 (GLUTATHIONE PEROXIDASE 3); glutathione peroxidase | chr2:18008642-18010600 REVERSE
BnaC03g52720D	-1.67631	21.2	redox.ascorbate and glutathione	Symbols: ATMP2, ATMAPR3, MSBP2, MAPR3 | ATMP2; heme binding | chr3:18129601-18131573 FORWARD
BnaC04g12100D	-2.35334	21.2	redox.ascorbate and glutathione	Symbols: B5 #4, ATCB5-B, CB5-B | CB5-B (CYTOCHROME B5 ISOFORM B); heme binding | chr2:13876774-13878531 REVERSE
BnaC04g50950D	-1.19566	21.2	redox.ascorbate and glutathione	Symbols: B5 #1, ATCB5-C, CB5-C | CB5-C (CYTOCHROME B5 ISOFORM C); heme binding | chr2:19151646-19152600 FORWARD
BnaC05g04550D	-2.66879	21.2	redox.ascorbate and glutathione	2-oxoglutarate-dependent dioxygenase, putative | chr1:2025601-2027271 FORWARD
BnaC05g04560D	-3.47999	21.2	redox.ascorbate and glutathione	2-oxoglutarate-dependent dioxygenase, putative | chr1:2035839-2037366 FORWARD
BnaC07g11960D	-3.15592	21.2	redox.ascorbate and glutathione	cytochrome B561 family protein | chr1:9022542-9024081 REVERSE
BnaC08g20570D	-1.67522	21.2	redox.ascorbate and glutathione	Symbols: ATMP2, ATMAPR3, MSBP2, MAPR3 | ATMP2; heme binding | chr3:18129601-18131573 FORWARD
BnaC08g44860D	-2	21.2	redox.ascorbate and glutathione	2-oxoglutarate-dependent dioxygenase, putative | chr1:2035839-2037366 FORWARD
BnaC08g44880D	-2.15038	21.2	redox.ascorbate and glutathione	2-oxoglutarate-dependent dioxygenase, putative | chr1:2035839-2037366 FORWARD
BnaC09g14200D	-3.46657	21.2	redox.ascorbate and glutathione	Symbols: B5 #5, ATCB5LP, CB5LP | CB5LP (CYTOCHROME B5-LIKE PROTEIN); heme binding | chr1:22342414-22343014 REVERSE
BnaCnng29610D	-3.7688	21.2	redox.ascorbate and glutathione	cytochrome B561 family protein | chr1:9022542-9024081 REVERSE
BnaA05g01210D	-1.18888	21.2	redox.ascorbate and glutathione	Symbols: B5 #1, ATCB5-C, CB5-C | CB5-C (CYTOCHROME B5 ISOFORM C); heme binding | chr2:19151646-19152600 FORWARD
BnaA05g21110D	1.17779	21.2	redox.ascorbate and glutathione	oxidoreductase, 2OG-Fe(II) oxygenase family protein | chr3:6556197-6557938 REVERSE
BnaA06g09530D	-2.30465	21.2	redox.ascorbate and glutathione	LOCATED IN: endomembrane system, integral to membrane; EXPRESSED IN: 16 plant structures; EXPRESSED DURING: 7 growth stages; CONTAINS InterPro DOMAIN/s: Cytochrome b561, eukaryote (InterPro:IPR004877), Cytochrome b561/ferric reductase transmembrane (InterPro:IPR006593); BEST Arabidopsis thaliana protein match is: ACYB-1; carbon-monoxide oxygenase (TAIR:AT5G38630.1); Has 447 Blast hits to 446 prot…
BnaA06g19120D	-1.61061	21.2	redox.ascorbate and glutathione	Symbols: ATMP2, ATMAPR3, MSBP2, MAPR3 | ATMP2; heme binding | chr3:18129601-18131573 FORWARD
BnaAnng36100D	-1.2095	21.2	redox.ascorbate and glutathione	Symbols: ATMP2, ATMAPR3, MSBP2, MAPR3 | ATMP2; heme binding | chr3:18129601-18131573 FORWARD
BnaC01g28730D	-1.88554	21.2	redox.ascorbate and glutathione	Symbols: B5 #5, ATCB5LP, CB5LP | CB5LP (CYTOCHROME B5-LIKE PROTEIN); heme binding | chr1:22342414-22343014 REVERSE
BnaC03g18070D	-8.95613	21.2	redox.ascorbate and glutathione	Symbols: B5 #4, ATCB5-B, CB5-B | CB5-B (CYTOCHROME B5 ISOFORM B); heme binding | chr2:13876774-13878531 REVERSE
BnaC03g40740D	-1.51775	21.2	redox.ascorbate and glutathione	oxidoreductase, 2OG-Fe(II) oxygenase family protein | chr3:6553529-6555147 REVERSE
BnaC03g40750D	7.29155	21.2	redox.ascorbate and glutathione	oxidoreductase, 2OG-Fe(II) oxygenase family protein | chr3:6553529-6555147 REVERSE
BnaC04g00770D	-1.13663	21.2	redox.ascorbate and glutathione	Symbols: B5 #1, ATCB5-C, CB5-C | CB5-C (CYTOCHROME B5 ISOFORM C); heme binding | chr2:19151646-19152600 FORWARD
BnaC04g31040D	-1.36044	21.2	redox.ascorbate and glutathione	Symbols: ACYB-1 | ACYB-1; carbon-monoxide oxygenase | chr5:15465992-15468185 FORWARD
BnaC04g43300D	-1.42439	21.2	redox.ascorbate and glutathione	Symbols: B5 #4, ATCB5-B, CB5-B | CB5-B (CYTOCHROME B5 ISOFORM B); heme binding | chr2:13876774-13878531 REVERSE
BnaC05g10900D	-1.99639	21.2	redox.ascorbate and glutathione	LOCATED IN: endomembrane system, integral to membrane; EXPRESSED IN: 16 plant structures; EXPRESSED DURING: 7 growth stages; CONTAINS InterPro DOMAIN/s: Cytochrome b561, eukaryote (InterPro:IPR004877), Cytochrome b561/ferric reductase transmembrane (InterPro:IPR006593); BEST Arabidopsis thaliana protein match is: ACYB-1; carbon-monoxide oxygenase (TAIR:AT5G38630.1); Has 447 Blast hits to 446 prot…
BnaC05g34020D	3.77259	21.2	redox.ascorbate and glutathione	oxidoreductase, 2OG-Fe(II) oxygenase family protein | chr3:6556197-6557938 REVERSE
BnaCnng31860D	2.77961	21.2	redox.ascorbate and glutathione	Symbols: ACYB-2 | ACYB-2; carbon-monoxide oxygenase | chr4:13053686-13055623 REVERSE
BnaA05g28340D	-1.70142	21.3	redox.heme	Symbols: AHB2, GLB2, ARATH GLB2, NSHB2 | AHB2 (ARABIDOPSIS HAEMOGLOBIN 2); oxygen transporter | chr3:3276226-3277860 REVERSE
BnaAnng36930D	-1.56843	21.3	redox.heme	Symbols: AHB2, GLB2, ARATH GLB2, NSHB2 | AHB2 (ARABIDOPSIS HAEMOGLOBIN 2); oxygen transporter | chr3:3276226-3277860 REVERSE
BnaAnng16600D	-1.18149	21.3	redox.heme	SOUL heme-binding family protein | chr3:3130998-3133192 REVERSE
BnaC05g42510D	-3.06717	21.3	redox.heme	Symbols: AHB2, GLB2, ARATH GLB2, NSHB2 | AHB2 (ARABIDOPSIS HAEMOGLOBIN 2); oxygen transporter | chr3:3276226-3277860 REVERSE
BnaA01g03830D	-2.11056	21.4	redox.glutaredoxins	glutaredoxin family protein | chr4:15940561-15941330 REVERSE
BnaA02g04900D	-2.18877	21.4	redox.glutaredoxins	glutaredoxin, putative | chr5:6938598-6939848 FORWARD
BnaA03g19420D	-2.94811	21.4	redox.glutaredoxins	glutaredoxin family protein | chr2:17226948-17228378 FORWARD
BnaA03g52330D	-2.88106	21.4	redox.glutaredoxins	glutaredoxin family protein | chr4:15940561-15941330 REVERSE
BnaA04g03030D	-1.87447	21.4	redox.glutaredoxins	glutaredoxin family protein | chr3:21123924-21125647 FORWARD
BnaA04g11830D	-1.19041	21.4	redox.glutaredoxins	glutaredoxin, putative | chr5:16147594-16149198 REVERSE
BnaA04g23830D	-3.03756	21.4	redox.glutaredoxins	glutaredoxin family protein | chr2:17226948-17228378 FORWARD
BnaA09g02360D	-2.39993	21.4	redox.glutaredoxins	glutaredoxin family protein | chr3:10848669-10850122 FORWARD
BnaA09g06320D	-1.64424	21.4	redox.glutaredoxins	glutaredoxin, putative | chr5:25286223-25287694 FORWARD
BnaA09g07960D	-1.5796	21.4	redox.glutaredoxins	glutaredoxin, putative | chr1:29073843-29074796 FORWARD
BnaA09g49730D	-1.23209	21.4	redox.glutaredoxins	glutaredoxin family protein | chr1:2097151-2097655 FORWARD
BnaA10g29790D	-1.419	21.4	redox.glutaredoxins	glutaredoxin family protein | chr5:4455333-4457019 FORWARD
BnaAnng00840D	-3.15961	21.4	redox.glutaredoxins	glutaredoxin family protein | chr5:1035658-1036967 REVERSE
BnaAnng04400D	-2.65753	21.4	redox.glutaredoxins	electron carrier/ protein disulfide oxidoreductase | chr4:5444345-5446891 FORWARD
BnaC03g01480D	-4.63097	21.4	redox.glutaredoxins	glutaredoxin family protein | chr5:1035658-1036967 REVERSE
BnaC04g33910D	-1.24417	21.4	redox.glutaredoxins	glutaredoxin, putative | chr5:16147594-16149198 REVERSE
BnaC05g04720D	-11.0385	21.4	redox.glutaredoxins	glutaredoxin family protein | chr1:2097151-2097655 FORWARD
BnaC07g10320D	-4.26946	21.4	redox.glutaredoxins	Symbols: GRX480 | GRX480; electron carrier/ protein disulfide oxidoreductase | chr1:10013474-10014073 REVERSE
BnaC07g44080D	-2.60656	21.4	redox.glutaredoxins	glutaredoxin family protein | chr4:15940561-15941330 REVERSE
BnaC09g08100D	-2.05376	21.4	redox.glutaredoxins	glutaredoxin, putative | chr1:29073843-29074796 FORWARD
BnaA09g12210D	1.71319	21.4	redox.glutaredoxins	glutaredoxin family protein | chr1:23953233-23954492 FORWARD
BnaA03g03680D	-1.89412	21.4	redox.glutaredoxins	glutaredoxin family protein | chr5:3844940-3845645 REVERSE
BnaA03g55390D	-8.14636	21.4	redox.glutaredoxins	glutaredoxin family protein | chr5:1974659-1975378 REVERSE
BnaA04g00240D	-1.0473	21.4	redox.glutaredoxins	glutaredoxin family protein | chr3:23268710-23269324 FORWARD
BnaA05g23870D	-1.10711	21.4	redox.glutaredoxins	Symbols: ATGRX4, GRX4 | GRX4 (GLUTAREDOXIN 4); metal ion binding | chr3:5307944-5309557 REVERSE
BnaA06g31270D	-7.75933	21.4	redox.glutaredoxins	glutaredoxin family protein | chr3:10848669-10850122 FORWARD
BnaA08g11940D	-1.11595	21.4	redox.glutaredoxins	glutaredoxin family protein | chr4:15940561-15941330 REVERSE
BnaA09g36420D	-2.05741	21.4	redox.glutaredoxins	glutaredoxin family protein | chr3:21123924-21125647 FORWARD
BnaA10g16360D	1.51749	21.4	redox.glutaredoxins	glutaredoxin family protein | chr5:6183258-6183954 REVERSE
BnaC01g05190D	-2.32025	21.4	redox.glutaredoxins	glutaredoxin family protein | chr4:15940561-15941330 REVERSE
BnaC03g05180D	-1.97964	21.4	redox.glutaredoxins	glutaredoxin family protein | chr5:3844940-3845645 REVERSE
BnaC03g09120D	-1.57032	21.4	redox.glutaredoxins	glutaredoxin family protein | chr5:6183258-6183954 REVERSE
BnaC03g17010D	-1.89837	21.4	redox.glutaredoxins	glutaredoxin family protein | chr2:13011105-13011784 REVERSE
BnaC03g66790D	-3.32758	21.4	redox.glutaredoxins	glutaredoxin family protein | chr4:15940561-15941330 REVERSE
BnaC04g24540D	-1.14931	21.4	redox.glutaredoxins	glutaredoxin family protein | chr3:21123924-21125647 FORWARD
BnaC04g47590D	-2.2984	21.4	redox.glutaredoxins	glutaredoxin family protein | chr2:17226948-17228378 FORWARD
BnaC05g24870D	-8.78136	21.4	redox.glutaredoxins	glutaredoxin family protein | chr1:11858211-11859292 FORWARD
BnaC07g33140D	8.74819	21.4	redox.glutaredoxins	glutaredoxin family protein | chr4:8931652-8932295 FORWARD
BnaC08g28000D	-2.79152	21.4	redox.glutaredoxins	glutaredoxin family protein | chr3:21123924-21125647 FORWARD
BnaC08g44980D	-1.14319	21.4	redox.glutaredoxins	glutaredoxin family protein | chr1:2097151-2097655 FORWARD
BnaC09g25360D	-1.88235	21.4	redox.glutaredoxins	electron carrier/ protein disulfide oxidoreductase | chr4:5444345-5446891 FORWARD
BnaC09g44690D	-5.18442	21.4	redox.glutaredoxins	glutaredoxin family protein | chr5:3844940-3845645 REVERSE
BnaC06g27340D	1.92956	21.5	redox.peroxiredoxin	Symbols: TPX1 | TPX1 (thioredoxin-dependent peroxidase 1); antioxidant/ oxidoreductase | chr1:24559306-24560936 REVERSE
BnaA07g25540D	2.91793	21.5	redox.peroxiredoxin	Symbols: TPX1 | TPX1 (thioredoxin-dependent peroxidase 1); antioxidant/ oxidoreductase | chr1:24559306-24560936 REVERSE
BnaCnng59880D	1.70809	21.5	redox.peroxiredoxin	peroxiredoxin type 2, putative | chr3:19639668-19640619 FORWARD
BnaA06g14510D	-4.83738	21.6	redox.dismutases and catalases	Symbols: CAT3, SEN2, ATCAT3 | CAT3 (CATALASE 3); catalase | chr1:7143067-7146540 FORWARD
BnaA07g11370D	-4.67077	21.6	redox.dismutases and catalases	Symbols: CAT3, SEN2, ATCAT3 | CAT3 (CATALASE 3); catalase | chr1:7143067-7146540 FORWARD
BnaA08g21730D	-2.99448	21.6	redox.dismutases and catalases	Symbols: CAT3, SEN2, ATCAT3 | CAT3 (CATALASE 3); catalase | chr1:7143067-7146540 FORWARD
BnaA09g47090D	-1.83808	21.6	redox.dismutases and catalases	Symbols: ATCCS | ATCCS (COPPER CHAPERONE FOR SOD1); superoxide dismutase/ superoxide dismutase copper chaperone | chr1:4267106-4268926 REVERSE
BnaA10g16720D	-2.70659	21.6	redox.dismutases and catalases	Symbols: CSD3 | CSD3 (copper/zinc superoxide dismutase 3); superoxide dismutase | chr5:5987187-5988885 FORWARD
BnaC02g42190D	-1.16896	21.6	redox.dismutases and catalases	Symbols: FSD3 | FSD3 (FE SUPEROXIDE DISMUTASE 3); superoxide dismutase | chr5:7850523-7852532 FORWARD
BnaC05g15970D	-3.88572	21.6	redox.dismutases and catalases	Symbols: CAT3, SEN2, ATCAT3 | CAT3 (CATALASE 3); catalase | chr1:7143067-7146540 FORWARD
BnaC07g15280D	-4.71086	21.6	redox.dismutases and catalases	Symbols: CAT3, SEN2, ATCAT3 | CAT3 (CATALASE 3); catalase | chr1:7143067-7146540 FORWARD
BnaC08g19360D	-3.48774	21.6	redox.dismutases and catalases	Symbols: CAT3, SEN2, ATCAT3 | CAT3 (CATALASE 3); catalase | chr1:7143067-7146540 FORWARD
BnaC08g41150D	-1.54917	21.6	redox.dismutases and catalases	Symbols: ATCCS | ATCCS (COPPER CHAPERONE FOR SOD1); superoxide dismutase/ superoxide dismutase copper chaperone | chr1:4267106-4268926 REVERSE
BnaC09g10980D	-1.20674	21.6	redox.dismutases and catalases	Symbols: ATCCS | ATCCS (COPPER CHAPERONE FOR SOD1); superoxide dismutase/ superoxide dismutase copper chaperone | chr1:4267106-4268926 REVERSE
BnaC09g39740D	-2.57711	21.6	redox.dismutases and catalases	Symbols: CSD3 | CSD3 (copper/zinc superoxide dismutase 3); superoxide dismutase | chr5:5987187-5988885 FORWARD
BnaA07g11360D	1.3013	21.6	redox.dismutases and catalases	Symbols: CAT1 | CAT1 (CATALASE 1); catalase | chr1:7146636-7149977 FORWARD
BnaA08g24700D	-1.02748	21.6	redox.dismutases and catalases	Symbols: ATCCS | ATCCS (COPPER CHAPERONE FOR SOD1); superoxide dismutase/ superoxide dismutase copper chaperone | chr1:4267106-4268926 REVERSE
BnaA09g35800D	-8.33688	21.6	redox.dismutases and catalases	superoxide dismutase (Mn), putative / manganese superoxide dismutase, putative | chr3:20893946-20895625 REVERSE
BnaA03g06710D	-2.35345	21.99	redox.misc	Symbols: ATCBR, CBR1 | ATCBR (ARABIDOPSIS THALIANA NADH:CYTOCHROME B5 REDUCTASE 1); cytochrome-b5 reductase | chr5:5864251-5866709 REVERSE
BnaA08g07990D	-2.33165	21.99	redox.misc	Symbols: ATSRX, SRX | SRX (SULFIREDOXIN); DNA binding / oxidoreductase, acting on sulfur group of donors | chr1:11133485-11134405 FORWARD
BnaC02g07470D	-1.81918	21.99	redox.misc	Symbols: ATCBR, CBR1 | ATCBR (ARABIDOPSIS THALIANA NADH:CYTOCHROME B5 REDUCTASE 1); cytochrome-b5 reductase | chr5:5864251-5866709 REVERSE
BnaC08g09260D	-1.6815	21.99	redox.misc	Symbols: ATSRX, SRX | SRX (SULFIREDOXIN); DNA binding / oxidoreductase, acting on sulfur group of donors | chr1:11133485-11134405 FORWARD
BnaA10g17010D	-1.28737	21.99	redox.misc	Symbols: ATCBR, CBR1 | ATCBR (ARABIDOPSIS THALIANA NADH:CYTOCHROME B5 REDUCTASE 1); cytochrome-b5 reductase | chr5:5864251-5866709 REVERSE
BnaC02g19290D	-8.32193	21.99	redox.misc	Symbols: ATCBR, CBR1 | ATCBR (ARABIDOPSIS THALIANA NADH:CYTOCHROME B5 REDUCTASE 1); cytochrome-b5 reductase | chr5:5864251-5866709 REVERSE
BnaC03g08580D	-1.60135	21.99	redox.misc	Symbols: ATCBR, CBR1 | ATCBR (ARABIDOPSIS THALIANA NADH:CYTOCHROME B5 REDUCTASE 1); cytochrome-b5 reductase | chr5:5864251-5866709 REVERSE
BnaC01g19770D	-1.72183	23	nucleotide metabolism	histidine triad family protein / HIT family protein | chr4:9334622-9335968 REVERSE
BnaA01g35400D	-1.97392	23	nucleotide metabolism	histidine triad family protein / HIT family protein | chr4:9334622-9335968 REVERSE
BnaA02g34000D	-2.29746	23.2	nucleotide metabolism.degradation	Symbols: SAL2, ATSAL2 | SAL2; 3'(2'),5'-bisphosphate nucleotidase/ inositol or phosphatidylinositol phosphatase | chr5:25616638-25618631 FORWARD
BnaA03g49610D	-1.90875	23.2	nucleotide metabolism.degradation	Symbols: CDA1, AT-CDA1, DESZ | CDA1 (CYTIDINE DEAMINASE 1); cytidine deaminase | chr2:8470374-8471644 REVERSE
BnaA04g21890D	-1.57994	23.2	nucleotide metabolism.degradation	Symbols: FAC1, ATAMPD | FAC1 (EMBRYONIC FACTOR1); AMP deaminase | chr2:16033448-16038876 REVERSE
BnaA06g09020D	-2.41966	23.2	nucleotide metabolism.degradation	nucleoside phosphatase family protein / GDA1/CD39 family protein | chr1:4861266-4864094 FORWARD
BnaA06g09030D	-3.85692	23.2	nucleotide metabolism.degradation	nucleoside phosphatase family protein / GDA1/CD39 family protein | chr1:4868452-4871488 FORWARD
BnaA09g20120D	-1.75969	23.2	nucleotide metabolism.degradation	Symbols: ATALN | ATALN (Arabidopsis allantoinase); allantoinase/ hydrolase | chr4:2522034-2525280 REVERSE
BnaA09g20190D	-1.64082	23.2	nucleotide metabolism.degradation	adenosine/AMP deaminase family protein | chr4:2464859-2467166 REVERSE
BnaAnng21580D	-1.49306	23.2	nucleotide metabolism.degradation	Symbols: AHL, ATAHL | AHL (ARABIDOPSIS HAL2-LIKE); 3'(2'),5'-bisphosphate nucleotidase/ inositol or phosphatidylinositol phosphatase | chr5:22085998-22088017 FORWARD
BnaAnng23340D	-2.52263	23.2	nucleotide metabolism.degradation	cytidine/deoxycytidylate deaminase family protein | chr5:10043914-10045882 REVERSE
BnaC02g18410D	-1.05624	23.2	nucleotide metabolism.degradation	Symbols: TADA | TADA (TRNA ARGININE ADENOSINE DEAMINASE); catalytic/ hydrolase/ zinc ion binding | chr1:25804418-25808982 FORWARD
BnaC02g42860D	-2.06249	23.2	nucleotide metabolism.degradation	Symbols: SAL2, ATSAL2 | SAL2; 3'(2'),5'-bisphosphate nucleotidase/ inositol or phosphatidylinositol phosphatase | chr5:25616638-25618631 FORWARD
BnaC04g56640D	-1.47923	23.2	nucleotide metabolism.degradation	Symbols: FAC1, ATAMPD | FAC1 (EMBRYONIC FACTOR1); AMP deaminase | chr2:16033448-16038876 REVERSE
BnaC05g10480D	-2.25895	23.2	nucleotide metabolism.degradation	nucleoside phosphatase family protein / GDA1/CD39 family protein | chr1:4868452-4871488 FORWARD
BnaC07g50780D	-1.85364	23.2	nucleotide metabolism.degradation	Symbols: CDA1, AT-CDA1, DESZ | CDA1 (CYTIDINE DEAMINASE 1); cytidine deaminase | chr2:8470374-8471644 REVERSE
BnaC08g39780D	-4.84615	23.2	nucleotide metabolism.degradation	nucleoside phosphatase family protein / GDA1/CD39 family protein | chr1:4868452-4871488 FORWARD
BnaC09g22450D	-2.41804	23.2	nucleotide metabolism.degradation	Symbols: ATALN | ATALN (Arabidopsis allantoinase); allantoinase/ hydrolase | chr4:2522034-2525280 REVERSE
BnaC09g22520D	-1.67689	23.2	nucleotide metabolism.degradation	adenosine/AMP deaminase family protein | chr4:2464859-2467166 REVERSE
BnaCnng16680D	-2.12553	23.2	nucleotide metabolism.degradation	Symbols: AHL, ATAHL | AHL (ARABIDOPSIS HAL2-LIKE); 3'(2'),5'-bisphosphate nucleotidase/ inositol or phosphatidylinositol phosphatase | chr5:22085998-22088017 FORWARD
BnaCnng32980D	-2.20128	23.2	nucleotide metabolism.degradation	Symbols: CDA1, AT-CDA1, DESZ | CDA1 (CYTIDINE DEAMINASE 1); cytidine deaminase | chr2:8470374-8471644 REVERSE
BnaCnng46690D	-1.14369	23.2	nucleotide metabolism.degradation	Symbols: ATXDH1, XDH1 | XDH1 (XANTHINE DEHYDROGENASE 1); xanthine dehydrogenase | chr4:16618573-16625057 REVERSE
BnaA06g23130D	2.63127	23.2	nucleotide metabolism.degradation	3'(2'),5'-bisphosphate nucleotidase, putative / inositol polyphosphate 1-phosphatase, putative | chr5:25613258-25615880 FORWARD
BnaA10g16150D	3.0575	23.2	nucleotide metabolism.degradation	inosine-uridine preferring nucleoside hydrolase family protein | chr5:6290676-6295811 FORWARD
BnaC03g50270D	3.22936	23.2	nucleotide metabolism.degradation	3'(2'),5'-bisphosphate nucleotidase, putative / inositol polyphosphate 1-phosphatase, putative | chr5:25613258-25615880 FORWARD
BnaA06g33910D	3.43824	23.2	nucleotide metabolism.degradation	nucleoside phosphatase family protein / GDA1/CD39 family protein | chr2:865070-868289 REVERSE
BnaA05g06460D	-1.14751	23.2	nucleotide metabolism.degradation	Symbols: FAC1, ATAMPD | FAC1 (EMBRYONIC FACTOR1); AMP deaminase | chr2:16033448-16038876 REVERSE
BnaA06g23140D	-1.97524	23.2	nucleotide metabolism.degradation	Symbols: SAL2, ATSAL2 | SAL2; 3'(2'),5'-bisphosphate nucleotidase/ inositol or phosphatidylinositol phosphatase | chr5:25616638-25618631 FORWARD
BnaA09g00610D	-1.71103	23.2	nucleotide metabolism.degradation	Symbols: ATXDH1, XDH1 | XDH1 (XANTHINE DEHYDROGENASE 1); xanthine dehydrogenase | chr4:16618573-16625057 REVERSE
BnaA09g06680D	-1.91809	23.2	nucleotide metabolism.degradation	Symbols: SAL1, ALX8, ATSAL1, HOS2, FRY1 | SAL1; 3'(2'),5'-bisphosphate nucleotidase/ inositol or phosphatidylinositol phosphatase | chr5:25609812-25611933 FORWARD
BnaAnng20200D	-1.39574	23.2	nucleotide metabolism.degradation	Symbols: CDA1, AT-CDA1, DESZ | CDA1 (CYTIDINE DEAMINASE 1); cytidine deaminase | chr2:8470374-8471644 REVERSE
BnaC01g03570D	-1.19378	23.2	nucleotide metabolism.degradation	Symbols: ATXDH1, XDH1 | XDH1 (XANTHINE DEHYDROGENASE 1); xanthine dehydrogenase | chr4:16618573-16625057 REVERSE
BnaC02g18400D	-1.23095	23.2	nucleotide metabolism.degradation	Symbols: TADA | TADA (TRNA ARGININE ADENOSINE DEAMINASE); catalytic/ hydrolase/ zinc ion binding | chr1:25804418-25808982 FORWARD
BnaC03g50260D	-1.80245	23.2	nucleotide metabolism.degradation	Symbols: SAL2, ATSAL2 | SAL2; 3'(2'),5'-bisphosphate nucleotidase/ inositol or phosphatidylinositol phosphatase | chr5:25616638-25618631 FORWARD
BnaC05g10470D	-1.12814	23.2	nucleotide metabolism.degradation	nucleoside phosphatase family protein / GDA1/CD39 family protein | chr1:4861266-4864094 FORWARD
BnaC07g08000D	1.08857	23.2	nucleotide metabolism.degradation	uricase / urate oxidase / nodulin 35, putative | chr2:11164575-11167195 FORWARD
BnaC07g22030D	1.38853	23.2	nucleotide metabolism.degradation	nucleoside phosphatase family protein / GDA1/CD39 family protein | chr2:865070-868289 REVERSE
BnaA02g15730D	-1.38925	23.3	nucleotide metabolism.salvage	deoxynucleoside kinase family | chr1:27111894-27114342 REVERSE
BnaA07g29830D	-1.56991	23.3	nucleotide metabolism.salvage	deoxynucleoside kinase family | chr1:27111894-27114342 REVERSE
BnaA09g19350D	-1.5656	23.3	nucleotide metabolism.salvage	Symbols: ATUPS1 | ATUPS1 (ARABIDOPSIS THALIANA UREIDE PERMEASE 1); allantoin uptake transmembrane transporter | chr2:1094757-1096968 FORWARD
BnaC05g20350D	-3.2309	23.3	nucleotide metabolism.salvage	Symbols: ATUPS5 | ATUPS5 (ARABIDOPSIS THALIANA UREIDE PERMEASE 5); allantoin uptake transmembrane transporter/ uracil transmembrane transporter/ xanthine transmembrane transporter | chr1:9143967-9146049 REVERSE
BnaC06g33070D	-2.01039	23.3	nucleotide metabolism.salvage	deoxynucleoside kinase family | chr1:27111894-27114342 REVERSE
BnaC08g23730D	-3.04538	23.3	nucleotide metabolism.salvage	deoxynucleoside kinase family | chr1:27111894-27114342 REVERSE
BnaA09g28910D	-3.00122	23.3	nucleotide metabolism.salvage	Symbols: ATUPS5 | ATUPS5 (ARABIDOPSIS THALIANA UREIDE PERMEASE 5); allantoin uptake transmembrane transporter/ uracil transmembrane transporter/ xanthine transmembrane transporter | chr1:9143967-9146049 REVERSE
BnaC02g20990D	-1.52712	23.3	nucleotide metabolism.salvage	deoxynucleoside kinase family | chr1:27111894-27114342 REVERSE
BnaC09g21970D	-1.50895	23.3	nucleotide metabolism.salvage	Symbols: ATUPS1 | ATUPS1 (ARABIDOPSIS THALIANA UREIDE PERMEASE 1); allantoin uptake transmembrane transporter | chr2:1094757-1096968 FORWARD
BnaA07g16170D	-1.89635	24	Biodegradation of Xenobiotics	glyoxal oxidase-related | chr3:19975619-19977439 FORWARD
BnaC06g42590D	-1.62604	24	Biodegradation of Xenobiotics	glyoxal oxidase-related | chr3:19975619-19977439 FORWARD
BnaA06g19010D	1.18837	24	Biodegradation of Xenobiotics	Symbols: ATCXE12, CXE12 | CXE12; carboxylesterase | chr3:18037047-18038234 REVERSE
BnaC06g02750D	2.72372	24	Biodegradation of Xenobiotics	Symbols: AtCXE5 | AtCXE5 (Arabidopsis thaliana carboxyesterase 5); carboxylesterase | chr1:18378697-18379799 REVERSE
BnaC05g26220D	2.84122	24	Biodegradation of Xenobiotics	Symbols: AtCXE5 | AtCXE5 (Arabidopsis thaliana carboxyesterase 5); carboxylesterase | chr1:18378697-18379799 REVERSE
BnaA06g02980D	4.57462	24	Biodegradation of Xenobiotics	Symbols: AtCXE5 | AtCXE5 (Arabidopsis thaliana carboxyesterase 5); carboxylesterase | chr1:18378697-18379799 REVERSE
BnaA06g26230D	-1.64046	24	Biodegradation of Xenobiotics	Symbols: AtCXE18 | AtCXE18 (Arabidopsis thaliana carboxyesterase 18); carboxylesterase | chr5:7932966-7934436 REVERSE
BnaAnng09070D	2.974	24	Biodegradation of Xenobiotics	glyoxal oxidase-related | chr1:28394779-28396596 REVERSE
BnaC07g30740D	-1.35879	24	Biodegradation of Xenobiotics	Symbols: AtCXE18 | AtCXE18 (Arabidopsis thaliana carboxyesterase 18); carboxylesterase | chr5:7932966-7934436 REVERSE
BnaA04g25070D	-1.47697	24.1	Biodegradation of Xenobiotics.hydroxyacylglutathione hydrolase	Symbols: GLX2-1, GLY1 | GLX2-1 (GLYOXALASE 2-1); hydroxyacylglutathione hydrolase | chr2:18035369-18038255 REVERSE
BnaA09g50050D	-2.36854	24.1	Biodegradation of Xenobiotics.hydroxyacylglutathione hydrolase	Symbols: GLX2-4 | GLX2-4 (glyoxalase 2-4); hydrolase/ hydroxyacylglutathione hydrolase/ zinc ion binding | chr1:1857767-1860730 REVERSE
BnaC08g44630D	-1.95703	24.1	Biodegradation of Xenobiotics.hydroxyacylglutathione hydrolase	Symbols: GLX2-4 | GLX2-4 (glyoxalase 2-4); hydrolase/ hydroxyacylglutathione hydrolase/ zinc ion binding | chr1:1857767-1860730 REVERSE
BnaC03g17440D	2.51563	24.1	Biodegradation of Xenobiotics.hydroxyacylglutathione hydrolase	Symbols: GLX2-5 | GLX2-5 (GLYOXALASE 2-5); hydroxyacylglutathione hydrolase/ iron ion binding / zinc ion binding | chr2:13368292-13371057 FORWARD
BnaA03g14380D	2.80245	24.1	Biodegradation of Xenobiotics.hydroxyacylglutathione hydrolase	Symbols: GLX2-5 | GLX2-5 (GLYOXALASE 2-5); hydroxyacylglutathione hydrolase/ iron ion binding / zinc ion binding | chr2:13368292-13371057 FORWARD
BnaCnng30690D	1.69744	24.1	Biodegradation of Xenobiotics.hydroxyacylglutathione hydrolase	Symbols: GLX2-5 | GLX2-5 (GLYOXALASE 2-5); hydroxyacylglutathione hydrolase/ iron ion binding / zinc ion binding | chr2:13368292-13371057 FORWARD
BnaCnng46950D	-1.06598	24.1	Biodegradation of Xenobiotics.hydroxyacylglutathione hydrolase	Symbols: GLX2-2, GLY2 | GLY2; hydroxyacylglutathione hydrolase | chr3:3397549-3399574 REVERSE
BnaA05g35240D	-1.46171	24.2	Biodegradation of Xenobiotics.lactoylglutathione lyase	lactoylglutathione lyase family protein / glyoxalase I family protein | chr2:13644395-13645799 FORWARD
BnaCnng59150D	-2.03991	24.2	Biodegradation of Xenobiotics.lactoylglutathione lyase	lactoylglutathione lyase family protein / glyoxalase I family protein | chr2:13644395-13645799 FORWARD
BnaA03g10440D	-1.55855	24.2	Biodegradation of Xenobiotics.lactoylglutathione lyase	lactoylglutathione lyase family protein / glyoxalase I family protein | chr5:23083898-23085246 REVERSE
BnaA08g25110D	-1.2071	24.2	Biodegradation of Xenobiotics.lactoylglutathione lyase	Symbols: ATGLX1 | ATGLX1 (GLYOXALASE I HOMOLOG); lactoylglutathione lyase/ metal ion binding | chr1:3995169-3997864 FORWARD
BnaA10g11070D	-1.26341	24.2	Biodegradation of Xenobiotics.lactoylglutathione lyase	lactoylglutathione lyase family protein / glyoxalase I family protein | chr5:23083898-23085246 REVERSE
BnaC02g46640D	-2.59212	24.2	Biodegradation of Xenobiotics.lactoylglutathione lyase	lactoylglutathione lyase family protein / glyoxalase I family protein | chr1:30151003-30152190 FORWARD
BnaC03g13130D	-1.03916	24.2	Biodegradation of Xenobiotics.lactoylglutathione lyase	lactoylglutathione lyase family protein / glyoxalase I family protein | chr5:23083898-23085246 REVERSE
BnaC05g38330D	-2.0085	24.3	Biodegradation of Xenobiotics.3-hydroxybutyryl-CoA dehydrogenase	3-hydroxybutyryl-CoA dehydrogenase, putative | chr3:5144997-5146856 FORWARD
BnaA05g24320D	-1.93615	24.3	Biodegradation of Xenobiotics.3-hydroxybutyryl-CoA dehydrogenase	3-hydroxybutyryl-CoA dehydrogenase, putative | chr3:5144997-5146856 FORWARD
BnaA01g03860D	-1.42115	25	C1-metabolism	Symbols: AtGLDP1 | AtGLDP1 (Arabidopsis thaliana glycine decarboxylase P-protein 1); catalytic/ glycine dehydrogenase (decarboxylating)/ pyridoxal phosphate binding | chr4:15926670-15931332 REVERSE
BnaA03g19510D	-1.19745	25	C1-metabolism	Symbols: ATSFGH, SFGH | SFGH (S-FORMYLGLUTATHIONE HYDROLASE); S-formylglutathione hydrolase/ hydrolase, acting on ester bonds | chr2:17323495-17325618 REVERSE
BnaA05g02260D	-2.13254	25	C1-metabolism	Symbols: ATSFGH, SFGH | SFGH (S-FORMYLGLUTATHIONE HYDROLASE); S-formylglutathione hydrolase/ hydrolase, acting on ester bonds | chr2:17323495-17325618 REVERSE
BnaAnng12730D	-1.37208	25	C1-metabolism	dimethylmenaquinone methyltransferase family protein | chr3:600893-602259 REVERSE
BnaC03g23390D	-1.54723	25	C1-metabolism	Symbols: ATSFGH, SFGH | SFGH (S-FORMYLGLUTATHIONE HYDROLASE); S-formylglutathione hydrolase/ hydrolase, acting on ester bonds | chr2:17323495-17325618 REVERSE
BnaC03g77370D	-1.63359	25	C1-metabolism	Symbols: SKB1, ATPRMT5 | SKB1 (SHK1 BINDING PROTEIN 1); protein methyltransferase | chr4:15132011-15136639 REVERSE
BnaC04g01950D	-1.14883	25	C1-metabolism	Symbols: ATSFGH, SFGH | SFGH (S-FORMYLGLUTATHIONE HYDROLASE); S-formylglutathione hydrolase/ hydrolase, acting on ester bonds | chr2:17323495-17325618 REVERSE
BnaA02g08790D	-1.3171	25	C1-metabolism	dimethylmenaquinone methyltransferase family protein | chr5:22775325-22777304 REVERSE
BnaA03g39030D	-1.00267	25	C1-metabolism	Symbols: THY-1 | THY-1 (THYMIDYLATE SYNTHASE 1); dihydrofolate reductase/ thymidylate synthase | chr2:7081783-7084557 REVERSE
BnaA08g12690D	-1.37754	25	C1-metabolism	Symbols: SKB1, ATPRMT5 | SKB1 (SHK1 BINDING PROTEIN 1); protein methyltransferase | chr4:15132011-15136639 REVERSE
BnaC03g13740D	1.14898	25	C1-metabolism	dimethylmenaquinone methyltransferase family protein | chr5:22775325-22777304 REVERSE
BnaC03g33130D	-1.16686	25	C1-metabolism	dimethylmenaquinone methyltransferase family protein | chr3:600893-602259 REVERSE
BnaC03g46190D	-1.12368	25	C1-metabolism	Symbols: THY-1 | THY-1 (THYMIDYLATE SYNTHASE 1); dihydrofolate reductase/ thymidylate synthase | chr2:7081783-7084557 REVERSE
BnaC07g43150D	-1.08373	25	C1-metabolism	Symbols: SKB1, ATPRMT5 | SKB1 (SHK1 BINDING PROTEIN 1); protein methyltransferase | chr4:15132011-15136639 REVERSE
BnaC03g67280D	-1.70711	25.1	C1-metabolism.glycine hydroxymethyltransferase	Symbols: SHM3 | SHM3 (SERINE HYDROXYMETHYLTRANSFERASE 3); catalytic/ glycine hydroxymethyltransferase/ pyridoxal phosphate binding | chr4:15689464-15692857 REVERSE
BnaCnng19300D	2.58376	25.1	C1-metabolism.glycine hydroxymethyltransferase	Symbols: SHM4 | SHM4 (serine hydroxymethyltransferase 4); catalytic/ glycine hydroxymethyltransferase/ pyridoxal phosphate binding | chr4:8047692-8050106 REVERSE
BnaA04g06460D	2.69607	25.1	C1-metabolism.glycine hydroxymethyltransferase	Symbols: SHM4 | SHM4 (serine hydroxymethyltransferase 4); catalytic/ glycine hydroxymethyltransferase/ pyridoxal phosphate binding | chr4:8047692-8050106 REVERSE
BnaA07g23560D	-1.02893	25.1	C1-metabolism.glycine hydroxymethyltransferase	Symbols: SHM2 | SHM2 (SERINE HYDROXYMETHYLTRANSFERASE 2); catalytic/ glycine hydroxymethyltransferase/ pyridoxal phosphate binding | chr5:9418195-9422091 FORWARD
BnaC06g32430D	1.17346	25.1	C1-metabolism.glycine hydroxymethyltransferase	Symbols: SHM2 | SHM2 (SERINE HYDROXYMETHYLTRANSFERASE 2); catalytic/ glycine hydroxymethyltransferase/ pyridoxal phosphate binding | chr5:9418195-9422091 FORWARD
BnaA05g15830D	-1.73859	25.2	C1-metabolism.formate-tetrahydrofolate ligase	Symbols: THFS | THFS (10-FORMYLTETRAHYDROFOLATE SYNTHETASE); ATP binding / copper ion binding / formate-tetrahydrofolate ligase | chr1:18701951-18704938 FORWARD
BnaA06g02790D	-2.53951	25.2	C1-metabolism.formate-tetrahydrofolate ligase	Symbols: THFS | THFS (10-FORMYLTETRAHYDROFOLATE SYNTHETASE); ATP binding / copper ion binding / formate-tetrahydrofolate ligase | chr1:18701951-18704938 FORWARD
BnaC05g51210D	-3.29624	25.2	C1-metabolism.formate-tetrahydrofolate ligase	Symbols: THFS | THFS (10-FORMYLTETRAHYDROFOLATE SYNTHETASE); ATP binding / copper ion binding / formate-tetrahydrofolate ligase | chr1:18701951-18704938 FORWARD
BnaC05g51220D	-4.27612	25.2	C1-metabolism.formate-tetrahydrofolate ligase	Symbols: THFS | THFS (10-FORMYLTETRAHYDROFOLATE SYNTHETASE); ATP binding / copper ion binding / formate-tetrahydrofolate ligase | chr1:18701951-18704938 FORWARD
BnaA01g06970D	-5.21653	25.3	C1-metabolism.dihydropteridine diphosphokinase	dihydropterin pyrophosphokinase, putative / dihydropteroate synthase, putative / DHPS, putative | chr4:14670156-14672669 REVERSE
BnaC01g08380D	-3.46357	25.3	C1-metabolism.dihydropteridine diphosphokinase	dihydropterin pyrophosphokinase, putative / dihydropteroate synthase, putative / DHPS, putative | chr4:14670156-14672669 REVERSE
BnaA02g01390D	-1.75364	25.4	C1-metabolism.5-formyltetrahydrofolate cyclo-ligase	Symbols: 5-FCL | 5-FCL (5-FORMYLTETRAHYDROFOLATE CYCLOLIGASE); 5-formyltetrahydrofolate cyclo-ligase | chr5:4136556-4138792 REVERSE
BnaA07g21280D	-2.58091	25.4	C1-metabolism.5-formyltetrahydrofolate cyclo-ligase	5-formyltetrahydrofolate cyclo-ligase family protein | chr1:28802925-28804784 REVERSE
BnaA10g20240D	-1.34836	25.4	C1-metabolism.5-formyltetrahydrofolate cyclo-ligase	Symbols: 5-FCL | 5-FCL (5-FORMYLTETRAHYDROFOLATE CYCLOLIGASE); 5-formyltetrahydrofolate cyclo-ligase | chr5:4136556-4138792 REVERSE
BnaC06g21660D	-1.60618	25.4	C1-metabolism.5-formyltetrahydrofolate cyclo-ligase	5-formyltetrahydrofolate cyclo-ligase family protein | chr1:28802925-28804784 REVERSE
BnaC09g44050D	-1.11412	25.4	C1-metabolism.5-formyltetrahydrofolate cyclo-ligase	Symbols: 5-FCL | 5-FCL (5-FORMYLTETRAHYDROFOLATE CYCLOLIGASE); 5-formyltetrahydrofolate cyclo-ligase | chr5:4136556-4138792 REVERSE
BnaA04g22120D	-2.94237	25.5	C1-metabolism.Methylenetetrahydrofolate dehydrogenase & Methenyltetrahydrofolate cyclohydrolase	tetrahydrofolate dehydrogenase/cyclohydrolase, putative | chr2:16165958-16168385 FORWARD
BnaA05g26750D	-1.76855	25.5	C1-metabolism.Methylenetetrahydrofolate dehydrogenase & Methenyltetrahydrofolate cyclohydrolase	tetrahydrofolate dehydrogenase/cyclohydrolase, putative | chr3:3919502-3921519 FORWARD
BnaC03g37500D	-1.41983	25.5	C1-metabolism.Methylenetetrahydrofolate dehydrogenase & Methenyltetrahydrofolate cyclohydrolase	tetrahydrofolate dehydrogenase/cyclohydrolase, putative | chr3:3919502-3921519 FORWARD
BnaC04g45850D	-3.8933	25.5	C1-metabolism.Methylenetetrahydrofolate dehydrogenase & Methenyltetrahydrofolate cyclohydrolase	tetrahydrofolate dehydrogenase/cyclohydrolase, putative | chr2:16165958-16168385 FORWARD
BnaA03g32210D	-1.12421	25.5	C1-metabolism.Methylenetetrahydrofolate dehydrogenase & Methenyltetrahydrofolate cyclohydrolase	tetrahydrofolate dehydrogenase/cyclohydrolase, putative | chr3:3919502-3921519 FORWARD
BnaA09g51830D	-1.46349	25.5	C1-metabolism.Methylenetetrahydrofolate dehydrogenase & Methenyltetrahydrofolate cyclohydrolase	tetrahydrofolate dehydrogenase/cyclohydrolase, putative | chr4:259028-261019 REVERSE
BnaC05g40770D	-1.00348	25.5	C1-metabolism.Methylenetetrahydrofolate dehydrogenase & Methenyltetrahydrofolate cyclohydrolase	tetrahydrofolate dehydrogenase/cyclohydrolase, putative | chr3:3919502-3921519 FORWARD
BnaCnng02210D	1.17254	25.5	C1-metabolism.Methylenetetrahydrofolate dehydrogenase & Methenyltetrahydrofolate cyclohydrolase	tetrahydrofolate dehydrogenase/cyclohydrolase, putative | chr4:259028-261019 REVERSE
BnaA02g30310D	-6.01123	25.7	C1-metabolism.GTP cyclohydrolase I	GTP cyclohydrolase I | chr3:2315077-2317188 FORWARD
BnaA05g30330D	-2.3235	25.7	C1-metabolism.GTP cyclohydrolase I	GTP cyclohydrolase I | chr3:2315077-2317188 FORWARD
BnaC02g38700D	-5.6865	25.7	C1-metabolism.GTP cyclohydrolase I	GTP cyclohydrolase I | chr3:2315077-2317188 FORWARD
BnaA01g31960D	-1.32656	25.8	C1-metabolism.tetrahydrofolate synthase	Symbols: ATDFC, DFC | DFC (DHFS-FPGS HOMOLOG C); tetrahydrofolylpolyglutamate synthase | chr3:3139383-3144523 REVERSE
BnaA09g35250D	-1.98507	25.8	C1-metabolism.tetrahydrofolate synthase	Symbols: ATDFD | ATDFD (A. THALIANA DHFS-FPGS HOMOLOG D); tetrahydrofolylpolyglutamate synthase | chr3:20636669-20639492 FORWARD
BnaC08g26580D	-2.25519	25.8	C1-metabolism.tetrahydrofolate synthase	Symbols: ATDFD | ATDFD (A. THALIANA DHFS-FPGS HOMOLOG D); tetrahydrofolylpolyglutamate synthase | chr3:20636669-20639492 FORWARD
BnaA06g36040D	-1.02221	25.8	C1-metabolism.tetrahydrofolate synthase	Symbols: GLA1, ATDFA, DFA | GLA1 (GLOBULAR ARREST1); dihydrofolate synthase | chr5:16595927-16598636 FORWARD
BnaC01g38830D	-1.53449	25.8	C1-metabolism.tetrahydrofolate synthase	Symbols: ATDFC, DFC | DFC (DHFS-FPGS HOMOLOG C); tetrahydrofolylpolyglutamate synthase | chr3:3139383-3144523 REVERSE
BnaC02g02140D	-1.70368	25.8	C1-metabolism.tetrahydrofolate synthase	Symbols: ATDFB, DFB | ATDFB (A. THALIANA DHFS-FPGS HOMOLOG B); tetrahydrofolylpolyglutamate synthase | chr5:1799490-1804492 REVERSE
BnaC07g19030D	-1.51357	25.8	C1-metabolism.tetrahydrofolate synthase	Symbols: GLA1, ATDFA, DFA | GLA1 (GLOBULAR ARREST1); dihydrofolate synthase | chr5:16595927-16598636 FORWARD
BnaA05g27330D	-1.08369	25.9	C1-metabolism.dihydroneopterin aldolase	dihydroneopterin aldolase, putative | chr3:3715071-3715904 REVERSE
BnaAnng09490D	-1.57454	25.9	C1-metabolism.dihydroneopterin aldolase	dihydroneopterin aldolase, putative | chr3:3715071-3715904 REVERSE
BnaC05g41450D	-2.6601	25.9	C1-metabolism.dihydroneopterin aldolase	dihydroneopterin aldolase, putative | chr3:3715071-3715904 REVERSE
BnaA05g27340D	-2.59182	25.9	C1-metabolism.dihydroneopterin aldolase	dihydroneopterin aldolase, putative | chr3:3715071-3715904 REVERSE
BnaA01g00380D	-1.79283	26.1	misc.misc2	formamidase, putative / formamide amidohydrolase, putative | chr4:17646408-17648684 FORWARD
BnaA01g00390D	-1.88292	26.1	misc.misc2	formamidase, putative / formamide amidohydrolase, putative | chr4:17646408-17648684 FORWARD
BnaA01g14950D	-1.33666	26.1	misc.misc2	Symbols: ATQC, QC, QCT | QC (GLUTAMINYL CYCLASE); catalytic/ glutaminyl-peptide cyclotransferase | chr4:13099818-13102578 REVERSE
BnaA01g23700D	-2.6262	26.1	misc.misc2	dienelactone hydrolase family protein | chr3:8473775-8475858 FORWARD
BnaA02g05170D	-1.61502	26.1	misc.misc2	Symbols: AAO1, AO1, ATAO, ATAO1 | AAO1 (ARABIDOPSIS ALDEHYDE OXIDASE 1); aldehyde oxidase/ indole-3-acetaldehyde oxidase | chr5:7116738-7122670 FORWARD
BnaA03g42310D	-2.30629	26.1	misc.misc2	catalytic/ epoxide hydrolase | chr4:9045624-9047449 REVERSE
BnaA05g35220D	-1.98469	26.1	misc.misc2	dienelactone hydrolase family protein | chr2:13805519-13807536 REVERSE
BnaA06g23370D	-2.03046	26.1	misc.misc2	2-nitropropane dioxygenase family / NPD family | chr5:25697354-25699212 REVERSE
BnaA07g16880D	-2.81176	26.1	misc.misc2	oxidoreductase, zinc-binding dehydrogenase family protein | chr3:20932791-20934540 REVERSE
BnaA09g17610D	-2.74552	26.1	misc.misc2	nodulin-related / integral membrane family protein | chr5:18388291-18390420 FORWARD
BnaA09g31660D	-2.41746	26.1	misc.misc2	epoxide hydrolase, putative | chr3:18945025-18946621 REVERSE
BnaA09g56810D	-2.12837	26.1	misc.misc2	Symbols: PDF1A, ATDEF1 | PDF1A (PEPTIDE DEFORMYLASE 1A); peptide deformylase | chr1:5294629-5295797 FORWARD
BnaA10g14600D	-1.69981	26.1	misc.misc2	Symbols: AAO1, AO1, ATAO, ATAO1 | AAO1 (ARABIDOPSIS ALDEHYDE OXIDASE 1); aldehyde oxidase/ indole-3-acetaldehyde oxidase | chr5:7116738-7122670 FORWARD
BnaAnng02030D	-2.63616	26.1	misc.misc2	dienelactone hydrolase family protein | chr1:13026289-13027667 FORWARD
BnaC01g01360D	-2.27306	26.1	misc.misc2	formamidase, putative / formamide amidohydrolase, putative | chr4:17646408-17648684 FORWARD
BnaC01g30540D	-1.37324	26.1	misc.misc2	dienelactone hydrolase family protein | chr3:8473775-8475858 FORWARD
BnaC06g08540D	-1.87522	26.1	misc.misc2	dienelactone hydrolase family protein | chr1:13026289-13027667 FORWARD
BnaC06g15940D	-2.08845	26.1	misc.misc2	oxidoreductase, zinc-binding dehydrogenase family protein | chr3:20932791-20934540 REVERSE
BnaC06g24190D	-2.13772	26.1	misc.misc2	oxidoreductase family protein | chr1:27167363-27169717 REVERSE
BnaC07g07910D	-1.25402	26.1	misc.misc2	dienelactone hydrolase family protein | chr3:8473775-8475858 FORWARD
BnaC08g22490D	-3.8413	26.1	misc.misc2	epoxide hydrolase, putative | chr3:18945025-18946621 REVERSE
BnaC08g38900D	-3.60486	26.1	misc.misc2	Symbols: PDF1A, ATDEF1 | PDF1A (PEPTIDE DEFORMYLASE 1A); peptide deformylase | chr1:5294629-5295797 FORWARD
BnaC09g18780D	-2.85987	26.1	misc.misc2	nodulin-related / integral membrane family protein | chr5:18388291-18390420 FORWARD
BnaC09g33690D	-1.22789	26.1	misc.misc2	bis(5'-adenosyl)-triphosphatase, putative | chr5:23558114-23559353 REVERSE
BnaC09g36910D	-1.54536	26.1	misc.misc2	Symbols: AAO1, AO1, ATAO, ATAO1 | AAO1 (ARABIDOPSIS ALDEHYDE OXIDASE 1); aldehyde oxidase/ indole-3-acetaldehyde oxidase | chr5:7116738-7122670 FORWARD
BnaC01g23690D	1.86349	26.1	misc.misc2	epoxide hydrolase, putative | chr3:18945025-18946621 REVERSE
BnaC09g18790D	1.9062	26.1	misc.misc2	nodulin-related / integral membrane family protein | chr5:18388291-18390420 FORWARD
BnaC05g09920D	4.60587	26.1	misc.misc2	Symbols: AAPT1, ATAAPT1 | AAPT1 (AMINOALCOHOLPHOSPHOTRANSFERASE 1); phosphatidyltransferase/ phosphotransferase, for other substituted phosphate groups | chr1:4638514-4642104 REVERSE
BnaA01g11440D	-1.49914	26.1	misc.misc2	oxidoreductase, zinc-binding dehydrogenase family protein | chr4:11475719-11477768 FORWARD
BnaA03g42280D	-2.05452	26.1	misc.misc2	epoxide hydrolase-related | chr4:9043712-9045599 REVERSE
BnaA06g08550D	4.33176	26.1	misc.misc2	Symbols: AAPT1, ATAAPT1 | AAPT1 (AMINOALCOHOLPHOSPHOTRANSFERASE 1); phosphatidyltransferase/ phosphotransferase, for other substituted phosphate groups | chr1:4638514-4642104 REVERSE
BnaA06g10090D	-2.40785	26.1	misc.misc2	Symbols: PDF1A, ATDEF1 | PDF1A (PEPTIDE DEFORMYLASE 1A); peptide deformylase | chr1:5294629-5295797 FORWARD
BnaA06g33540D	-1.37242	26.1	misc.misc2	Symbols: AAPT2, ATAAPT2 | AAPT2 (AMINOALCOHOLPHOSPHOTRANSFERASE); phosphatidyltransferase/ phosphotransferase, for other substituted phosphate groups | chr3:9295373-9298746 FORWARD
BnaA07g06370D	-1.17175	26.1	misc.misc2	dienelactone hydrolase family protein | chr3:8457778-8459691 REVERSE
BnaA10g12040D	-1.54235	26.1	misc.misc2	bis(5'-adenosyl)-triphosphatase, putative | chr5:23558114-23559353 REVERSE
BnaAnng20810D	-1.53261	26.1	misc.misc2	epoxide hydrolase, putative | chr4:1035681-1037615 FORWARD
BnaAnng33020D	-2.87036	26.1	misc.misc2	Symbols: AAO1, AO1, ATAO, ATAO1 | AAO1 (ARABIDOPSIS ALDEHYDE OXIDASE 1); aldehyde oxidase/ indole-3-acetaldehyde oxidase | chr5:7116738-7122670 FORWARD
BnaC01g01370D	-1.63813	26.1	misc.misc2	formamidase, putative / formamide amidohydrolase, putative | chr4:17646408-17648684 FORWARD
BnaC01g12890D	-1.38308	26.1	misc.misc2	oxidoreductase, zinc-binding dehydrogenase family protein | chr4:11475719-11477768 FORWARD
BnaC05g28690D	2.13835	26.1	misc.misc2	Symbols: CYP77A5P | CYP77A5P; catalytic | chr3:6261905-6264309 FORWARD
BnaC07g22750D	-1.74119	26.1	misc.misc2	Symbols: AAPT2, ATAAPT2 | AAPT2 (AMINOALCOHOLPHOSPHOTRANSFERASE); phosphatidyltransferase/ phosphotransferase, for other substituted phosphate groups | chr3:9295373-9298746 FORWARD
BnaC07g32000D	-1.07288	26.1	misc.misc2	epoxide hydrolase, putative | chr3:18945025-18946621 REVERSE
BnaC07g33340D	-1.44037	26.1	misc.misc2	epoxide hydrolase-related | chr4:9043712-9045599 REVERSE
BnaUnng02510D	-3.49185	26.1	misc.misc2	Symbols: AAO1, AO1, ATAO, ATAO1 | AAO1 (ARABIDOPSIS ALDEHYDE OXIDASE 1); aldehyde oxidase/ indole-3-acetaldehyde oxidase | chr5:7116738-7122670 FORWARD
BnaA08g20830D	-2.09039	26.11	misc.alcohol dehydrogenases	alcohol dehydrogenase, putative | chr1:7922428-7924944 FORWARD
BnaC01g13540D	1.44812	26.11	misc.alcohol dehydrogenases	alcohol dehydrogenase, putative | chr4:11711336-11714228 REVERSE
BnaA02g12150D	1.35462	26.11	misc.alcohol dehydrogenases	allyl alcohol dehydrogenase, putative | chr1:24371387-24373798 REVERSE
BnaA06g36450D	-1.05308	26.11	misc.alcohol dehydrogenases	Symbols: HOT5, ADH2, GSNOR | HOT5 (sensitive to hot temperatures 5); S-(hydroxymethyl)glutathione dehydrogenase/ S-nitrosoglutathione reductase | chr5:17684191-17686528 FORWARD
BnaA09g16810D	-1.04708	26.11	misc.alcohol dehydrogenases	Symbols: HOT5, ADH2, GSNOR | HOT5 (sensitive to hot temperatures 5); S-(hydroxymethyl)glutathione dehydrogenase/ S-nitrosoglutathione reductase | chr5:17684191-17686528 FORWARD
BnaA09g43000D	-3.25279	26.11	misc.alcohol dehydrogenases	alcohol dehydrogenase, putative | chr1:24044545-24046552 FORWARD
BnaC09g17760D	-1.35634	26.11	misc.alcohol dehydrogenases	Symbols: HOT5, ADH2, GSNOR | HOT5 (sensitive to hot temperatures 5); S-(hydroxymethyl)glutathione dehydrogenase/ S-nitrosoglutathione reductase | chr5:17684191-17686528 FORWARD
BnaA01g00410D	-4.07654	26.12	misc.peroxidases	peroxidase 50 (PER50) (P50) (PRXR2) | chr4:17631562-17633249 FORWARD
BnaA01g11800D	-2.70608	26.12	misc.peroxidases	Symbols: PRXR1 | PRXR1; electron carrier/ heme binding / peroxidase | chr4:11646174-11648462 REVERSE
BnaA03g52000D	-3.50061	26.12	misc.peroxidases	Symbols: APX6 | APX6; L-ascorbate peroxidase/ heme binding / peroxidase | chr4:15602721-15605400 FORWARD
BnaA04g09990D	-4.49923	26.12	misc.peroxidases	peroxidase, putative | chr5:16059509-16061043 REVERSE
BnaA04g29190D	-1.82247	26.12	misc.peroxidases	peroxidase 21 (PER21) (P21) (PRXR5) | chr2:15597921-15600077 REVERSE
BnaA05g19460D	-2.65834	26.12	misc.peroxidases	peroxidase 30 (PER30) (P30) (PRXR9) | chr3:7673276-7674839 FORWARD
BnaA05g22930D	-2.76441	26.12	misc.peroxidases	peroxidase, putative | chr3:5820961-5823199 FORWARD
BnaA08g11780D	-2.51206	26.12	misc.peroxidases	peroxidase, putative | chr4:16084828-16086296 FORWARD
BnaA09g42650D	-2.1539	26.12	misc.peroxidases	peroxidase 17 (PER17) (P17) | chr2:9513219-9514535 FORWARD
BnaA09g42660D	-2.46949	26.12	misc.peroxidases	peroxidase 17 (PER17) (P17) | chr2:9513219-9514535 FORWARD
BnaA10g03280D	-2.89608	26.12	misc.peroxidases	peroxidase, putative | chr1:1525601-1527234 REVERSE
BnaC01g13370D	-3.12124	26.12	misc.peroxidases	Symbols: PRXR1 | PRXR1; electron carrier/ heme binding / peroxidase | chr4:11646174-11648462 REVERSE
BnaC01g31810D	-2.01668	26.12	misc.peroxidases	peroxidase 30 (PER30) (P30) (PRXR9) | chr3:7673276-7674839 FORWARD
BnaC05g03290D	-1.94342	26.12	misc.peroxidases	peroxidase, putative | chr1:1525601-1527234 REVERSE
BnaC07g43770D	-3.87503	26.12	misc.peroxidases	Symbols: APX6 | APX6; L-ascorbate peroxidase/ heme binding / peroxidase | chr4:15602721-15605400 FORWARD
BnaC09g08690D	-3.98919	26.12	misc.peroxidases	peroxidase 32 (PER32) (P32) (PRXR3) | chr3:13526097-13529997 REVERSE
BnaCnng14900D	-2.61855	26.12	misc.peroxidases	peroxidase, putative | chr4:16084828-16086296 FORWARD
BnaCnng24390D	-10.3844	26.12	misc.peroxidases	peroxidase, putative | chr5:16059509-16061043 REVERSE
BnaC09g48850D	4.13795	26.12	misc.peroxidases	peroxidase, putative | chr5:2079955-2081684 REVERSE
BnaA10g24240D	4.74695	26.12	misc.peroxidases	peroxidase, putative | chr5:2077420-2079005 REVERSE
BnaC02g02350D	8.04075	26.12	misc.peroxidases	peroxidase, putative | chr5:1578951-1580875 REVERSE
BnaC03g33490D	9.82443	26.12	misc.peroxidases	peroxidase, putative | chr3:901841-903411 REVERSE
BnaA02g04550D	10.4374	26.12	misc.peroxidases	peroxidase, putative | chr5:6720384-6722475 REVERSE
BnaA01g03170D	-7.22882	26.12	misc.peroxidases	peroxidase, putative | chr4:16234670-16236492 REVERSE
BnaA01g06830D	7.35168	26.12	misc.peroxidases	peroxidase, putative | chr4:14762841-14764627 FORWARD
BnaA01g20660D	-2.09528	26.12	misc.peroxidases	Symbols: ATPERX34, PERX34, PRXCB, ATPCB | PRXCB (PEROXIDASE CB); peroxidase | chr3:18207651-18210132 FORWARD
BnaA03g17000D	-3.65108	26.12	misc.peroxidases	peroxidase 21 (PER21) (P21) (PRXR5) | chr2:15597921-15600077 REVERSE
BnaA03g47730D	-8.95613	26.12	misc.peroxidases	peroxidase, putative | chr4:13200593-13201941 FORWARD
BnaA03g54060D	-2.65951	26.12	misc.peroxidases	peroxidase 50 (PER50) (P50) (PRXR2) | chr4:17631562-17633249 FORWARD
BnaA04g23960D	3.03765	26.12	misc.peroxidases	electron carrier/ heme binding / peroxidase | chr2:17296812-17298731 REVERSE
BnaA05g34960D	-3.56478	26.12	misc.peroxidases	peroxidase 20 (PER20) (P20) | chr2:14892601-14893993 FORWARD
BnaA06g23270D	3.33065	26.12	misc.peroxidases	peroxidase, putative | chr5:25659306-25661002 REVERSE
BnaA09g08390D	-2.73054	26.12	misc.peroxidases	peroxidase 32 (PER32) (P32) (PRXR3) | chr3:13526097-13529997 REVERSE
BnaA09g53760D	-1.61973	26.12	misc.peroxidases	peroxidase, putative | chr4:5598115-5600312 REVERSE
BnaAnng01300D	8.39518	26.12	misc.peroxidases	peroxidase, putative | chr5:1578951-1580875 REVERSE
BnaAnng12900D	2.17075	26.12	misc.peroxidases	peroxidase 12 (PER12) (P12) (PRXR6) | chr1:26964249-26966688 FORWARD
BnaAnng32690D	-3.08746	26.12	misc.peroxidases	peroxidase 22 (PER22) (P22) (PRXEA) / basic peroxidase E | chr2:16076384-16078583 FORWARD
BnaC01g01400D	-3.74416	26.12	misc.peroxidases	peroxidase 50 (PER50) (P50) (PRXR2) | chr4:17631562-17633249 FORWARD
BnaC01g04790D	1.92246	26.12	misc.peroxidases	peroxidase, putative | chr4:16084828-16086296 FORWARD
BnaC01g25860D	-1.7684	26.12	misc.peroxidases	Symbols: ATPERX34, PERX34, PRXCB, ATPCB | PRXCB (PEROXIDASE CB); peroxidase | chr3:18207651-18210132 FORWARD
BnaC02g09180D	6.62838	26.12	misc.peroxidases	peroxidase, putative | chr5:6720384-6722475 REVERSE
BnaC03g20530D	-2.12264	26.12	misc.peroxidases	peroxidase 21 (PER21) (P21) (PRXR5) | chr2:15597921-15600077 REVERSE
BnaC03g66590D	-1.70044	26.12	misc.peroxidases	peroxidase, putative | chr4:16084828-16086296 FORWARD
BnaC04g34810D	-4.30743	26.12	misc.peroxidases	peroxidase 17 (PER17) (P17) | chr2:9513219-9514535 FORWARD
BnaC05g36360D	-2.60319	26.12	misc.peroxidases	peroxidase, putative | chr3:5820961-5823199 FORWARD
BnaC07g46560D	-1.89656	26.12	misc.peroxidases	peroxidase 50 (PER50) (P50) (PRXR2) | chr4:17631562-17633249 FORWARD
BnaC09g48860D	7.75933	26.12	misc.peroxidases	peroxidase, putative | chr5:2077420-2079005 REVERSE
BnaA03g27450D	-2.47793	26.13	misc.acid and other phosphatases	5'-AMP-activated protein kinase beta-1 subunit-related | chr3:198679-201742 REVERSE
BnaA03g49480D	-2.62295	26.13	misc.acid and other phosphatases	acid phosphatase class B family protein | chr4:14422152-14423603 REVERSE
BnaA04g15430D	-2.42339	26.13	misc.acid and other phosphatases	Symbols: PAP1, ATPAP1, PAP12, ATPAP12 | PAP12 (PURPLE ACID PHOSPHATASE 12); acid phosphatase/ protein serine/threonine phosphatase | chr2:11621222-11623618 REVERSE
BnaA05g00970D	-1.21186	26.13	misc.acid and other phosphatases	Symbols: POL | POL (poltergeist); protein serine/threonine phosphatase | chr2:19277903-19281760 REVERSE
BnaA05g20480D	-1.70785	26.13	misc.acid and other phosphatases	phosphoprotein phosphatase | chr3:6808585-6809508 REVERSE
BnaA05g30450D	-1.24832	26.13	misc.acid and other phosphatases	Symbols: ATPAP15, PAP15 | PAP15 (PURPLE ACID PHOSPHATASE 15); acid phosphatase/ protein serine/threonine phosphatase | chr3:2255710-2258005 REVERSE
BnaA06g22560D	-1.24596	26.13	misc.acid and other phosphatases	Symbols: ATPAP29, PAP29 | ATPAP29 (ARABIDOPSIS THALIANA PURPLE ACID PHOSPHATASE 29); acid phosphatase/ protein serine/threonine phosphatase | chr5:25328119-25329799 FORWARD
BnaA07g12610D	-2.7416	26.13	misc.acid and other phosphatases	phosphatidic acid phosphatase-related / PAP2-related | chr5:26534616-26536045 FORWARD
BnaA07g22920D	-3.78556	26.13	misc.acid and other phosphatases	acid phosphatase survival protein SurE, putative | chr1:27423385-27426135 REVERSE
BnaA07g30540D	-5.00278	26.13	misc.acid and other phosphatases	phosphatase | chr1:27464572-27466256 REVERSE
BnaA07g37220D	-1.96011	26.13	misc.acid and other phosphatases	purple acid phosphatase family protein | chr1:8840402-8842317 REVERSE
BnaA08g05220D	-1.8918	26.13	misc.acid and other phosphatases	Symbols: ATPAP23, PAP23 | PAP23 (PURPLE ACID PHOSPHATASE 23); acid phosphatase/ protein serine/threonine phosphatase | chr4:7957072-7958919 REVERSE
BnaA08g05520D	-1.69534	26.13	misc.acid and other phosphatases	acid phosphatase survival protein SurE, putative | chr4:8538586-8541899 FORWARD
BnaA08g07270D	-1.49089	26.13	misc.acid and other phosphatases	Symbols: ATPAP26, PAP26 | PAP26 (PURPLE ACID PHOSPHATASE 26); acid phosphatase/ protein serine/threonine phosphatase | chr5:13108154-13111631 REVERSE
BnaA08g13480D	-1.21459	26.13	misc.acid and other phosphatases	acid phosphatase class B family protein | chr4:14422152-14423603 REVERSE
BnaA08g31430D	-1.60044	26.13	misc.acid and other phosphatases	Symbols: PAP3, ATPAP3 | PAP3 (PURPLE ACID PHOSPHATASE 3); acid phosphatase/ protein serine/threonine phosphatase | chr1:5058680-5061136 FORWARD
BnaA09g49110D	-1.85917	26.13	misc.acid and other phosphatases	SIT4 phosphatase-associated family protein | chr1:2477157-2483138 FORWARD
BnaA10g11170D	-2.04747	26.13	misc.acid and other phosphatases	Symbols: ATPAP28, PAP28 | PAP28 (PURPLE ACID PHOSPHATASE 28); acid phosphatase/ protein serine/threonine phosphatase | chr5:23149880-23151370 FORWARD
BnaA10g20770D	-1.49845	26.13	misc.acid and other phosphatases	NLI interacting factor (NIF) family protein | chr5:3821803-3823843 REVERSE
BnaA10g29770D	-3.14875	26.13	misc.acid and other phosphatases	acid phosphatase/ oxidoreductase/ transition metal ion binding | chr5:4876515-4885821 FORWARD
BnaAnng16610D	-3.28271	26.13	misc.acid and other phosphatases	Symbols: ATPAP16, PAP16 | PAP16 (PURPLE ACID PHOSPHATASE 16); acid phosphatase/ protein serine/threonine phosphatase | chr3:3137362-3139056 REVERSE
BnaC03g18120D	-2.70659	26.13	misc.acid and other phosphatases	Symbols: PAP13, ATPAP13 | purple acid phosphatase (PAP13) | chr2:13895825-13898277 FORWARD
BnaC03g32470D	-2.43431	26.13	misc.acid and other phosphatases	5'-AMP-activated protein kinase beta-1 subunit-related | chr3:198679-201742 REVERSE
BnaC03g46360D	-2.84629	26.13	misc.acid and other phosphatases	Symbols: PAP10, ATPAP10 | PAP10 (PURPLE ACID PHOSPHATASE 10); acid phosphatase/ protein serine/threonine phosphatase | chr2:7120419-7122832 REVERSE
BnaC03g51090D	-1.57648	26.13	misc.acid and other phosphatases	Symbols: ATPAP29, PAP29 | ATPAP29 (ARABIDOPSIS THALIANA PURPLE ACID PHOSPHATASE 29); acid phosphatase/ protein serine/threonine phosphatase | chr5:25328119-25329799 FORWARD
BnaC04g38420D	-1.90354	26.13	misc.acid and other phosphatases	Symbols: PAP1, ATPAP1, PAP12, ATPAP12 | PAP12 (PURPLE ACID PHOSPHATASE 12); acid phosphatase/ protein serine/threonine phosphatase | chr2:11621222-11623618 REVERSE
BnaC05g48240D	-1.65648	26.13	misc.acid and other phosphatases	Symbols: LPP3, ATLPP3 | LPP3 (LIPID PHOSPHATE PHOSPHATASE 3); phosphatidate phosphatase | chr3:551351-554671 FORWARD
BnaC06g34050D	-1.97791	26.13	misc.acid and other phosphatases	acid phosphatase survival protein SurE, putative | chr1:27423385-27426135 REVERSE
BnaC06g43820D	-3.20704	26.13	misc.acid and other phosphatases	phosphatase | chr1:27464572-27466256 REVERSE
BnaC07g10880D	-2.83094	26.13	misc.acid and other phosphatases	purple acid phosphatase family protein | chr1:8840402-8842317 REVERSE
BnaC08g39060D	-2.9222	26.13	misc.acid and other phosphatases	Symbols: ATPAP2, ATLPP2, LPP2 | LPP2 (LIPID PHOSPHATE PHOSPHATASE 2); acid phosphatase/ phosphatidate phosphatase | chr1:5187626-5189673 FORWARD
BnaC08g40040D	-1.02226	26.13	misc.acid and other phosphatases	calcineurin-like phosphoesterase family protein | chr1:4753145-4755580 REVERSE
BnaC08g40180D	-2.65743	26.13	misc.acid and other phosphatases	calcineurin-like phosphoesterase family protein | chr1:4715394-4718235 REVERSE
BnaC08g43410D	-1.34845	26.13	misc.acid and other phosphatases	SIT4 phosphatase-associated family protein | chr1:2477157-2483138 FORWARD
BnaC09g53400D	-2.02736	26.13	misc.acid and other phosphatases	Symbols: ATPAP28, PAP28 | PAP28 (PURPLE ACID PHOSPHATASE 28); acid phosphatase/ protein serine/threonine phosphatase | chr5:23149880-23151370 FORWARD
BnaC07g19130D	1.22897	26.13	misc.acid and other phosphatases	NLI interacting factor (NIF) family protein | chr5:18825103-18829221 FORWARD
BnaC04g05450D	1.25723	26.13	misc.acid and other phosphatases	acid phosphatase class B family protein | chr2:16663017-16664538 REVERSE
BnaA02g21590D	1.31411	26.13	misc.acid and other phosphatases	hydrolase/ protein serine/threonine phosphatase | chr4:7093542-7099697 REVERSE
BnaC07g21340D	1.60412	26.13	misc.acid and other phosphatases	Symbols: PAP8, ATPAP8 | PAP8 (PURPLE ACID PHOSPHATASE 8); acid phosphatase/ protein serine/threonine phosphatase | chr2:396768-399208 REVERSE
BnaC05g07350D	1.62827	26.13	misc.acid and other phosphatases	histidine acid phosphatase family protein | chr1:3205741-3208598 FORWARD
BnaA05g20440D	1.64236	26.13	misc.acid and other phosphatases	Symbols: ATPAP18, PAP18 | PAP18 (PURPLE ACID PHOSPHATASE 18); acid phosphatase/ protein serine/threonine phosphatase | chr3:7157906-7160417 FORWARD
BnaCnng23820D	1.86299	26.13	misc.acid and other phosphatases	hydrolase/ protein serine/threonine phosphatase | chr4:7093542-7099697 REVERSE
BnaCnng03060D	1.87232	26.13	misc.acid and other phosphatases	phosphatidic acid phosphatase-related / PAP2-related | chr5:721867-723400 FORWARD
BnaA06g05800D	3.94138	26.13	misc.acid and other phosphatases	histidine acid phosphatase family protein | chr1:3205741-3208598 FORWARD
BnaC04g26670D	4.235	26.13	misc.acid and other phosphatases	phosphatidic acid phosphatase-related / PAP2-related | chr3:20005733-20008254 FORWARD
BnaA05g22460D	4.62936	26.13	misc.acid and other phosphatases	Symbols: ATACP5, ATPAP17, PAP17 | PAP17; acid phosphatase/ phosphatase/ protein serine/threonine phosphatase | chr3:6089605-6091231 FORWARD
BnaA04g04400D	4.66572	26.13	misc.acid and other phosphatases	phosphatidic acid phosphatase-related / PAP2-related | chr3:20005733-20008254 FORWARD
BnaC05g35720D	4.6865	26.13	misc.acid and other phosphatases	Symbols: ATACP5, ATPAP17, PAP17 | PAP17; acid phosphatase/ phosphatase/ protein serine/threonine phosphatase | chr3:6089605-6091231 FORWARD
BnaA01g12290D	-2.07604	26.13	misc.acid and other phosphatases	phosphatidic acid phosphatase-related / PAP2-related | chr4:11878137-11878920 REVERSE
BnaA03g15100D	-1.8606	26.13	misc.acid and other phosphatases	Symbols: PAP13, ATPAP13 | purple acid phosphatase (PAP13) | chr2:13895825-13898277 FORWARD
BnaA05g05670D	-1.37051	26.13	misc.acid and other phosphatases	acid phosphatase class B family protein | chr2:16663017-16664538 REVERSE
BnaA06g08770D	-2.58496	26.13	misc.acid and other phosphatases	calcineurin-like phosphoesterase family protein | chr1:4715394-4718235 REVERSE
BnaA08g23000D	1.83026	26.13	misc.acid and other phosphatases	phosphatase | chr1:6090560-6092027 REVERSE
BnaA09g06490D	-3.34016	26.13	misc.acid and other phosphatases	Symbols: ATPAP29, PAP29 | ATPAP29 (ARABIDOPSIS THALIANA PURPLE ACID PHOSPHATASE 29); acid phosphatase/ protein serine/threonine phosphatase | chr5:25328119-25329799 FORWARD
BnaA09g08700D	-1.15155	26.13	misc.acid and other phosphatases	Symbols: PAP10, ATPAP10 | PAP10 (PURPLE ACID PHOSPHATASE 10); acid phosphatase/ protein serine/threonine phosphatase | chr2:7120419-7122832 REVERSE
BnaA09g48290D	-1.55733	26.13	misc.acid and other phosphatases	histidine acid phosphatase family protein | chr1:3205741-3208598 FORWARD
BnaAnng00610D	1.96247	26.13	misc.acid and other phosphatases	phosphatidic acid phosphatase-related / PAP2-related | chr5:721867-723400 FORWARD
BnaC01g17060D	-2.66742	26.13	misc.acid and other phosphatases	acid phosphatase, putative | chr4:12901534-12903125 REVERSE
BnaC01g34650D	1.34692	26.13	misc.acid and other phosphatases	Symbols: ATACP5, ATPAP17, PAP17 | PAP17; acid phosphatase/ phosphatase/ protein serine/threonine phosphatase | chr3:6089605-6091231 FORWARD
BnaC02g21720D	2.55128	26.13	misc.acid and other phosphatases	phosphatase | chr1:27464572-27466256 REVERSE
BnaC02g28490D	-1.3918	26.13	misc.acid and other phosphatases	acid phosphatase, putative | chr4:12901534-12903125 REVERSE
BnaC02g48930D	-1.40227	26.13	misc.acid and other phosphatases	phosphatidic acid phosphatase-related / PAP2-related | chr5:26534616-26536045 FORWARD
BnaC03g46400D	-1.12631	26.13	misc.acid and other phosphatases	Symbols: PAP10, ATPAP10 | PAP10 (PURPLE ACID PHOSPHATASE 10); acid phosphatase/ protein serine/threonine phosphatase | chr2:7120419-7122832 REVERSE
BnaC05g44840D	-1.50267	26.13	misc.acid and other phosphatases	Symbols: ATPAP15, PAP15 | PAP15 (PURPLE ACID PHOSPHATASE 15); acid phosphatase/ protein serine/threonine phosphatase | chr3:2255710-2258005 REVERSE
BnaC07g21290D	-2.4842	26.13	misc.acid and other phosphatases	Symbols: PAP7, ATPAP7 | PAP7 (PURPLE ACID PHOSPHATASE 7); acid phosphatase/ protein serine/threonine phosphatase | chr2:391423-394032 REVERSE
BnaC07g41870D	-2.80497	26.13	misc.acid and other phosphatases	acid phosphatase class B family protein | chr4:14422152-14423603 REVERSE
BnaC08g00490D	-2.92459	26.13	misc.acid and other phosphatases	acid phosphatase class B family protein | chr1:1042362-1043864 REVERSE
BnaC08g17490D	2.92681	26.13	misc.acid and other phosphatases	phosphatase | chr1:6090560-6092027 REVERSE
BnaC09g20440D	1.25333	26.13	misc.acid and other phosphatases	Symbols: ATPAP1, PAP1, LPP1, ATLPP1 | ATPAP1 (PHOSPHATIDIC ACID PHOSPHATASE 1); phosphatidate phosphatase | chr2:106900-108803 REVERSE
BnaC09g23760D	-1.1134	26.13	misc.acid and other phosphatases	hydrolase/ protein serine/threonine phosphatase | chr4:7093542-7099697 REVERSE
BnaCnng15730D	-1.54347	26.13	misc.acid and other phosphatases	Symbols: ATPAP29, PAP29 | ATPAP29 (ARABIDOPSIS THALIANA PURPLE ACID PHOSPHATASE 29); acid phosphatase/ protein serine/threonine phosphatase | chr5:25328119-25329799 FORWARD
BnaCnng24750D	-1.87407	26.13	misc.acid and other phosphatases	acid phosphatase survival protein SurE, putative | chr1:27423385-27426135 REVERSE
BnaCnng46140D	1.03595	26.13	misc.acid and other phosphatases	Symbols: ATPAP18, PAP18 | PAP18 (PURPLE ACID PHOSPHATASE 18); acid phosphatase/ protein serine/threonine phosphatase | chr3:7157906-7160417 FORWARD
BnaCnng46570D	-4.12102	26.13	misc.acid and other phosphatases	phosphatidic acid phosphatase-related / PAP2-related | chr5:26534616-26536045 FORWARD
BnaCnng72040D	-2.66297	26.13	misc.acid and other phosphatases	Symbols: PAP10, ATPAP10 | PAP10 (PURPLE ACID PHOSPHATASE 10); acid phosphatase/ protein serine/threonine phosphatase | chr2:7120419-7122832 REVERSE
BnaA01g29440D	-7.64386	26.14	misc.oxygenases	oxidoreductase, 2OG-Fe(II) oxygenase family protein | chr1:9771793-9773345 FORWARD
BnaA05g21940D	-1.23447	26.14	misc.oxygenases	oxidoreductase, 2OG-Fe(II) oxygenase family protein | chr3:6237930-6240605 REVERSE
BnaAnng11120D	-1.01348	26.14	misc.oxygenases	oxidoreductase, 2OG-Fe(II) oxygenase family protein | chr3:6237930-6240605 REVERSE
BnaC03g40440D	-1.25129	26.14	misc.oxygenases	oxidoreductase, 2OG-Fe(II) oxygenase family protein | chr3:6237930-6240605 REVERSE
BnaC05g35150D	-1.63707	26.14	misc.oxygenases	oxidoreductase, 2OG-Fe(II) oxygenase family protein | chr3:6237930-6240605 REVERSE
BnaC05g51970D	-8.77039	26.14	misc.oxygenases	oxidoreductase, 2OG-Fe(II) oxygenase family protein | chr1:9771793-9773345 FORWARD
BnaA02g26810D	1.46518	26.14	misc.oxygenases	phytanoyl-CoA dioxygenase (PhyH) family protein | chr2:221246-223418 FORWARD
BnaA07g38980D	-1.92704	26.14	misc.oxygenases	pathogen-responsive alpha-dioxygenase, putative | chr1:27703944-27707514 REVERSE
BnaA09g30240D	-1.16249	26.14	misc.oxygenases	iron ion binding / oxidoreductase/ oxidoreductase, acting on paired donors, with incorporation or reduction of molecular oxygen, 2-oxoglutarate as one donor, and incorporation of one atom each of oxygen into both donors | chr1:8125023-8127196 REVERSE
BnaC02g22330D	1.74147	26.14	misc.oxygenases	pathogen-responsive alpha-dioxygenase, putative | chr1:27703944-27707514 REVERSE
BnaC05g18240D	-1.11357	26.14	misc.oxygenases	iron ion binding / oxidoreductase/ oxidoreductase, acting on paired donors, with incorporation or reduction of molecular oxygen, 2-oxoglutarate as one donor, and incorporation of one atom each of oxygen into both donors | chr1:8125023-8127196 REVERSE
BnaC08g06110D	-1.10338	26.14	misc.oxygenases	iron ion binding / oxidoreductase/ oxidoreductase, acting on paired donors, with incorporation or reduction of molecular oxygen, 2-oxoglutarate as one donor, and incorporation of one atom each of oxygen into both donors | chr1:8125023-8127196 REVERSE
BnaCnng73240D	-2.43093	26.14	misc.oxygenases	oxidoreductase, 2OG-Fe(II) oxygenase family protein | chr1:9771793-9773345 FORWARD
BnaA01g29500D	-1.87101	26.16	misc.myrosinases-lectin-jacalin	GDSL-motif lipase/hydrolase family protein | chr3:4732893-4734609 FORWARD
BnaA03g00480D	-5.07064	26.16	misc.myrosinases-lectin-jacalin	legume lectin family protein | chr5:32832-34326 FORWARD
BnaA03g07130D	-1.14731	26.16	misc.myrosinases-lectin-jacalin	curculin-like (mannose-binding) lectin family protein | chr5:6127797-6129285 FORWARD
BnaA03g18540D	-2.23136	26.16	misc.myrosinases-lectin-jacalin	Symbols: JAL22 | JAL22 (JACALIN-RELATED LECTIN 22) | chr2:16414073-16416815 REVERSE
BnaA06g01420D	-1.44299	26.16	misc.myrosinases-lectin-jacalin	GDSL-motif lipase, putative | chr1:20167629-20169600 FORWARD
BnaA06g01430D	-2.13535	26.16	misc.myrosinases-lectin-jacalin	myrosinase-associated protein, putative | chr1:20161670-20163743 REVERSE
BnaA06g01990D	-1.25489	26.16	misc.myrosinases-lectin-jacalin	Symbols: MBP2, MBP1.2, F-ATMBP | MBP2 (MYROSINASE-BINDING PROTEIN 2); sugar binding / thioglucosidase binding | chr1:19345940-19348668 REVERSE
BnaA08g29200D	-2.27836	26.16	misc.myrosinases-lectin-jacalin	GDSL-motif lipase, putative | chr1:20167629-20169600 FORWARD
BnaAnng14010D	-3.83519	26.16	misc.myrosinases-lectin-jacalin	legume lectin family protein | chr5:32832-34326 FORWARD
BnaC01g37130D	-2.11349	26.16	misc.myrosinases-lectin-jacalin	GDSL-motif lipase/hydrolase family protein | chr3:4732893-4734609 FORWARD
BnaC02g03680D	-3.84645	26.16	misc.myrosinases-lectin-jacalin	legume lectin family protein | chr5:32832-34326 FORWARD
BnaC02g21750D	-1.90999	26.16	misc.myrosinases-lectin-jacalin	jacalin lectin family protein | chr1:27475060-27475962 REVERSE
BnaC02g40120D	-2.97889	26.16	misc.myrosinases-lectin-jacalin	Symbols: TGG1, BGLU38 | TGG1 (THIOGLUCOSIDE GLUCOHYDROLASE 1); hydrolase, hydrolyzing O-glycosyl compounds / thioglucosidase | chr5:9079505-9082384 REVERSE
BnaC02g40130D	-3.47643	26.16	misc.myrosinases-lectin-jacalin	Symbols: TGG1, BGLU38 | TGG1 (THIOGLUCOSIDE GLUCOHYDROLASE 1); hydrolase, hydrolyzing O-glycosyl compounds / thioglucosidase | chr5:9079505-9082384 REVERSE
BnaC02g40420D	-2.88707	26.16	misc.myrosinases-lectin-jacalin	Symbols: TGG1, BGLU38 | TGG1 (THIOGLUCOSIDE GLUCOHYDROLASE 1); hydrolase, hydrolyzing O-glycosyl compounds / thioglucosidase | chr5:9079505-9082384 REVERSE
BnaC03g00460D	-3.02826	26.16	misc.myrosinases-lectin-jacalin	legume lectin family protein | chr5:32832-34326 FORWARD
BnaC03g78280D	-1.95776	26.16	misc.myrosinases-lectin-jacalin	GDSL-motif lipase, putative | chr1:20167629-20169600 FORWARD
BnaC04g46230D	-1.23404	26.16	misc.myrosinases-lectin-jacalin	Symbols: JAL22 | JAL22 (JACALIN-RELATED LECTIN 22) | chr2:16414073-16416815 REVERSE
BnaC06g06770D	-8.49185	26.16	misc.myrosinases-lectin-jacalin	GDSL-motif lipase, putative | chr1:20167629-20169600 FORWARD
BnaC06g30120D	-2.39753	26.16	misc.myrosinases-lectin-jacalin	Symbols: JAL22 | JAL22 (JACALIN-RELATED LECTIN 22) | chr2:16414073-16416815 REVERSE
BnaCnng53320D	-2.80419	26.16	misc.myrosinases-lectin-jacalin	Symbols: TGG1, BGLU38 | TGG1 (THIOGLUCOSIDE GLUCOHYDROLASE 1); hydrolase, hydrolyzing O-glycosyl compounds / thioglucosidase | chr5:9079505-9082384 REVERSE
BnaCnng69940D	-1.25305	26.16	misc.myrosinases-lectin-jacalin	Symbols: JAL22 | JAL22 (JACALIN-RELATED LECTIN 22) | chr2:16414073-16416815 REVERSE
BnaA04g00910D	1.56396	26.16	misc.myrosinases-lectin-jacalin	Symbols: AtPP2-A13 | AtPP2-A13 (Arabidopsis thaliana phloem protein 2-A13); carbohydrate binding | chr3:22602910-22604578 FORWARD
BnaC08g19180D	1.59009	26.16	misc.myrosinases-lectin-jacalin	jacalin lectin family protein | chr1:6816702-6819542 REVERSE
BnaA08g21950D	1.91795	26.16	misc.myrosinases-lectin-jacalin	jacalin lectin family protein | chr1:6816702-6819542 REVERSE
BnaA01g24750D	-1.09439	26.16	misc.myrosinases-lectin-jacalin	Symbols: TGG1, BGLU38 | TGG1 (THIOGLUCOSIDE GLUCOHYDROLASE 1); hydrolase, hydrolyzing O-glycosyl compounds / thioglucosidase | chr5:9079505-9082384 REVERSE
BnaA02g35160D	-1.89947	26.16	misc.myrosinases-lectin-jacalin	curculin-like (mannose-binding) lectin family protein | chr5:6127797-6129285 FORWARD
BnaA03g24520D	-1.7954	26.16	misc.myrosinases-lectin-jacalin	Symbols: TGG1, BGLU38 | TGG1 (THIOGLUCOSIDE GLUCOHYDROLASE 1); hydrolase, hydrolyzing O-glycosyl compounds / thioglucosidase | chr5:9079505-9082384 REVERSE
BnaA04g18820D	-1.01268	26.16	misc.myrosinases-lectin-jacalin	Symbols: NSP2, ATNSP2 | NSP2 (NITRILE SPECIFIER PROTEIN 2) | chr2:14029190-14031074 REVERSE
BnaA04g23180D	2.9113	26.16	misc.myrosinases-lectin-jacalin	Symbols: JAL22 | JAL22 (JACALIN-RELATED LECTIN 22) | chr2:16414073-16416815 REVERSE
BnaA05g15070D	-1.44563	26.16	misc.myrosinases-lectin-jacalin	jacalin lectin family protein | chr1:12256664-12260605 FORWARD
BnaA05g23330D	2.02748	26.16	misc.myrosinases-lectin-jacalin	Symbols: MBP1, ATMBP | MBP1 (MYROSINASE-BINDING PROTEIN 1); protein binding | chr1:19350375-19352782 REVERSE
BnaA06g37510D	2.15277	26.16	misc.myrosinases-lectin-jacalin	Symbols: NSP2, ATNSP2 | NSP2 (NITRILE SPECIFIER PROTEIN 2) | chr2:14029190-14031074 REVERSE
BnaA07g38390D	2.95846	26.16	misc.myrosinases-lectin-jacalin	curculin-like (mannose-binding) lectin family protein / PAN domain-containing protein | chr1:29634124-29635813 REVERSE
BnaA08g01710D	1.44015	26.16	misc.myrosinases-lectin-jacalin	Symbols: MBP2, MBP1.2, F-ATMBP | MBP2 (MYROSINASE-BINDING PROTEIN 2); sugar binding / thioglucosidase binding | chr1:19345940-19348668 REVERSE
BnaA09g26590D	-1.53699	26.16	misc.myrosinases-lectin-jacalin	Symbols: TGG1, BGLU38 | TGG1 (THIOGLUCOSIDE GLUCOHYDROLASE 1); hydrolase, hydrolyzing O-glycosyl compounds / thioglucosidase | chr5:9079505-9082384 REVERSE
BnaA09g51740D	-1.01741	26.16	misc.myrosinases-lectin-jacalin	Symbols: RLK4 | RLK4 (RECEPTOR-LIKE PROTEIN KINASE 4); protein kinase/ sugar binding | chr4:148814-151686 FORWARD
BnaC02g08080D	-2.37182	26.16	misc.myrosinases-lectin-jacalin	curculin-like (mannose-binding) lectin family protein | chr5:6127797-6129285 FORWARD
BnaC03g22030D	-1.33174	26.16	misc.myrosinases-lectin-jacalin	Symbols: JAL22 | JAL22 (JACALIN-RELATED LECTIN 22) | chr2:16414073-16416815 REVERSE
BnaC04g21970D	-2.75899	26.16	misc.myrosinases-lectin-jacalin	Symbols: AtPP2-A13 | AtPP2-A13 (Arabidopsis thaliana phloem protein 2-A13); carbohydrate binding | chr3:22602910-22604578 FORWARD
BnaC04g46210D	2.53147	26.16	misc.myrosinases-lectin-jacalin	Symbols: JAL22 | JAL22 (JACALIN-RELATED LECTIN 22) | chr2:16414073-16416815 REVERSE
BnaC05g15300D	1.07019	26.16	misc.myrosinases-lectin-jacalin	jacalin lectin family protein | chr1:6816702-6819542 REVERSE
BnaC06g05180D	7.02237	26.16	misc.myrosinases-lectin-jacalin	Symbols: NSP4 | NSP4 (NITRILE SPECIFIER PROTEIN 4) | chr3:5571992-5574541 FORWARD
BnaCnng15490D	-3.20163	26.16	misc.myrosinases-lectin-jacalin	Symbols: MBP2, MBP1.2, F-ATMBP | MBP2 (MYROSINASE-BINDING PROTEIN 2); sugar binding / thioglucosidase binding | chr1:19345940-19348668 REVERSE
BnaCnng21640D	-1.03121	26.16	misc.myrosinases-lectin-jacalin	Symbols: NSP2, ATNSP2 | NSP2 (NITRILE SPECIFIER PROTEIN 2) | chr2:14029190-14031074 REVERSE
BnaCnng59950D	-1.94286	26.16	misc.myrosinases-lectin-jacalin	Symbols: TGG1, BGLU38 | TGG1 (THIOGLUCOSIDE GLUCOHYDROLASE 1); hydrolase, hydrolyzing O-glycosyl compounds / thioglucosidase | chr5:9079505-9082384 REVERSE
BnaCnng78710D	-2.14775	26.16	misc.myrosinases-lectin-jacalin	legume lectin family protein | chr3:5624377-5625470 REVERSE
BnaA08g11490D	-1.53636	26.17	misc.dynamin	Symbols: ADL2, DRP3A | DRP3A (DYNAMIN-RELATED PROTEIN 3A); GTP binding / GTPase/ phosphoinositide binding | chr4:16160935-16166968 FORWARD
BnaC09g14660D	-1.4885	26.17	misc.dynamin	dynamin family protein | chr1:22291582-22293964 FORWARD
BnaC04g22340D	1.39906	26.17	misc.dynamin	Symbols: ADL4, ADLP2, EDR3, DRP1E, ADL1E | ADL1E (ARABIDOPSIS DYNAMIN-LIKE 1E); GTP binding / GTPase | chr3:22244169-22247833 REVERSE
BnaA09g45430D	1.02037	26.17	misc.dynamin	Symbols: ADL1C, ADL5, DRP1C | ADL1C (ARABIDOPSIS DYNAMIN-LIKE PROTEIN 1C); GTP binding / GTPase | chr1:5107421-5111670 REVERSE
BnaC01g04590D	-1.18995	26.17	misc.dynamin	Symbols: ADL2, DRP3A | DRP3A (DYNAMIN-RELATED PROTEIN 3A); GTP binding / GTPase/ phosphoinositide binding | chr4:16160935-16166968 FORWARD
BnaC06g10080D	-1.19994	26.17	misc.dynamin	dynamin family protein | chr1:19799238-19802598 FORWARD
BnaC06g18160D	6.69116	26.17	misc.dynamin	Symbols: ADL1B | ADL1B (ARABIDOPSIS DYNAMIN-LIKE 1B); GTP binding / GTPase | chr3:22860514-22864153 REVERSE
BnaA01g14640D	-2.59631	26.18	misc.invertase/pectin methylesterase inhibitor family protein	invertase/pectin methylesterase inhibitor family protein | chr4:12935710-12936658 REVERSE
BnaA03g47250D	-4.05453	26.18	misc.invertase/pectin methylesterase inhibitor family protein	invertase/pectin methylesterase inhibitor family protein | chr4:12935710-12936658 REVERSE
BnaA05g00320D	-3.9503	26.18	misc.invertase/pectin methylesterase inhibitor family protein	invertase/pectin methylesterase inhibitor family protein | chr2:19543991-19544806 REVERSE
BnaA06g04140D	-3.50667	26.18	misc.invertase/pectin methylesterase inhibitor family protein	Symbols: C/VIF1, ATC/VIF1 | C/VIF1 (CELL WALL / VACUOLAR INHIBITOR OF FRUCTOSIDASE 1); enzyme inhibitor/ pectinesterase/ pectinesterase inhibitor | chr1:17681157-17683629 REVERSE
BnaA09g12730D	-1.60742	26.18	misc.invertase/pectin methylesterase inhibitor family protein	invertase/pectin methylesterase inhibitor family protein | chr1:23245886-23246890 REVERSE
BnaA09g12760D	-2.6242	26.18	misc.invertase/pectin methylesterase inhibitor family protein	invertase/pectin methylesterase inhibitor family protein | chr1:23237574-23238512 REVERSE
BnaA09g18750D	-3.41238	26.18	misc.invertase/pectin methylesterase inhibitor family protein	invertase/pectin methylesterase inhibitor family protein | chr2:273917-274820 REVERSE
BnaA10g14750D	-2.09674	26.18	misc.invertase/pectin methylesterase inhibitor family protein	invertase/pectin methylesterase inhibitor family protein | chr5:7025686-7026532 REVERSE
BnaC01g17210D	-1.40535	26.18	misc.invertase/pectin methylesterase inhibitor family protein	invertase/pectin methylesterase inhibitor family protein | chr4:12935710-12936658 REVERSE
BnaC02g34050D	-4.64386	26.18	misc.invertase/pectin methylesterase inhibitor family protein	invertase/pectin methylesterase inhibitor family protein | chr2:273917-274820 REVERSE
BnaC02g46740D	-4.24236	26.18	misc.invertase/pectin methylesterase inhibitor family protein	Symbols: PME1 | PME1 (PECTIN METHYLESTERASE INHIBITOR 1); enzyme inhibitor/ pectinesterase/ pectinesterase inhibitor | chr4:7336497-7337356 FORWARD
BnaC03g49660D	-2.40003	26.18	misc.invertase/pectin methylesterase inhibitor family protein	Symbols: C/VIF2, ATC/VIF2 | C/VIF2 (CELL WALL / VACUOLAR INHIBITOR OF FRUCTOSIDASE 2); enzyme inhibitor/ pectinesterase/ pectinesterase inhibitor | chr5:25831834-25832502 FORWARD
BnaC07g39450D	-3.65398	26.18	misc.invertase/pectin methylesterase inhibitor family protein	invertase/pectin methylesterase inhibitor family protein | chr4:12935710-12936658 REVERSE
BnaC09g06450D	-2.80042	26.18	misc.invertase/pectin methylesterase inhibitor family protein	Symbols: C/VIF2, ATC/VIF2 | C/VIF2 (CELL WALL / VACUOLAR INHIBITOR OF FRUCTOSIDASE 2); enzyme inhibitor/ pectinesterase/ pectinesterase inhibitor | chr5:25831834-25832502 FORWARD
BnaC09g13080D	-4.05733	26.18	misc.invertase/pectin methylesterase inhibitor family protein	invertase/pectin methylesterase inhibitor family protein | chr1:23245886-23246890 REVERSE
BnaC09g13100D	-7.28472	26.18	misc.invertase/pectin methylesterase inhibitor family protein	invertase/pectin methylesterase inhibitor family protein | chr1:23237574-23238512 REVERSE
BnaC09g37120D	-3.13281	26.18	misc.invertase/pectin methylesterase inhibitor family protein	invertase/pectin methylesterase inhibitor family protein | chr5:7025686-7026532 REVERSE
BnaCnng22160D	-4	26.18	misc.invertase/pectin methylesterase inhibitor family protein	Symbols: PME1 | PME1 (PECTIN METHYLESTERASE INHIBITOR 1); enzyme inhibitor/ pectinesterase/ pectinesterase inhibitor | chr4:7336497-7337356 FORWARD
BnaCnng78530D	-3.25117	26.18	misc.invertase/pectin methylesterase inhibitor family protein	invertase/pectin methylesterase inhibitor family protein | chr1:8233997-8234893 REVERSE
BnaCnng76330D	1.36006	26.18	misc.invertase/pectin methylesterase inhibitor family protein	invertase/pectin methylesterase inhibitor family protein | chr3:5844495-5845046 REVERSE
BnaA09g47760D	1.74648	26.18	misc.invertase/pectin methylesterase inhibitor family protein	invertase/pectin methylesterase inhibitor family protein | chr1:3591633-3592411 REVERSE
BnaA09g06030D	1.81818	26.18	misc.invertase/pectin methylesterase inhibitor family protein	invertase/pectin methylesterase inhibitor family protein | chr5:25040649-25041462 FORWARD
BnaC03g51740D	2.29538	26.18	misc.invertase/pectin methylesterase inhibitor family protein	invertase/pectin methylesterase inhibitor family protein / DC 1.2 homolog (FL5-2I22) | chr5:25037426-25038362 FORWARD
BnaC09g05590D	2.75343	26.18	misc.invertase/pectin methylesterase inhibitor family protein	invertase/pectin methylesterase inhibitor family protein | chr5:25040649-25041462 FORWARD
BnaA01g27350D	3.23189	26.18	misc.invertase/pectin methylesterase inhibitor family protein	invertase/pectin methylesterase inhibitor family protein | chr3:5844495-5845046 REVERSE
BnaA02g33370D	3.37835	26.18	misc.invertase/pectin methylesterase inhibitor family protein	invertase/pectin methylesterase inhibitor family protein / DC 1.2 homolog (FL5-2I22) | chr5:25037426-25038362 FORWARD
BnaA06g21790D	3.77767	26.18	misc.invertase/pectin methylesterase inhibitor family protein	invertase/pectin methylesterase inhibitor family protein / DC 1.2 homolog (FL5-2I22) | chr5:25037426-25038362 FORWARD
BnaC05g11140D	3.85536	26.18	misc.invertase/pectin methylesterase inhibitor family protein	enzyme inhibitor/ pectinesterase/ pectinesterase inhibitor | chr1:5137014-5137957 FORWARD
BnaC08g16460D	4.15365	26.18	misc.invertase/pectin methylesterase inhibitor family protein	enzyme inhibitor/ pectinesterase/ pectinesterase inhibitor | chr1:5137014-5137957 FORWARD
BnaA08g31370D	4.22472	26.18	misc.invertase/pectin methylesterase inhibitor family protein	enzyme inhibitor/ pectinesterase/ pectinesterase inhibitor | chr1:5137014-5137957 FORWARD
BnaC03g51710D	8.64264	26.18	misc.invertase/pectin methylesterase inhibitor family protein	invertase/pectin methylesterase inhibitor family protein | chr5:25040649-25041462 FORWARD
BnaA06g21800D	8.73367	26.18	misc.invertase/pectin methylesterase inhibitor family protein	invertase/pectin methylesterase inhibitor family protein | chr5:25040649-25041462 FORWARD
BnaA02g21340D	-4.11711	26.18	misc.invertase/pectin methylesterase inhibitor family protein	Symbols: PME1 | PME1 (PECTIN METHYLESTERASE INHIBITOR 1); enzyme inhibitor/ pectinesterase/ pectinesterase inhibitor | chr4:7336497-7337356 FORWARD
BnaA02g36590D	-2	26.18	misc.invertase/pectin methylesterase inhibitor family protein	invertase/pectin methylesterase inhibitor family protein | chr5:19062174-19062780 REVERSE
BnaA07g10080D	-2.32193	26.18	misc.invertase/pectin methylesterase inhibitor family protein	invertase/pectin methylesterase inhibitor family protein | chr1:8233997-8234893 REVERSE
BnaA09g06930D	-3.84573	26.18	misc.invertase/pectin methylesterase inhibitor family protein	Symbols: C/VIF2, ATC/VIF2 | C/VIF2 (CELL WALL / VACUOLAR INHIBITOR OF FRUCTOSIDASE 2); enzyme inhibitor/ pectinesterase/ pectinesterase inhibitor | chr5:25831834-25832502 FORWARD
BnaA09g20980D	-5.03953	26.18	misc.invertase/pectin methylesterase inhibitor family protein	Symbols: PME1 | PME1 (PECTIN METHYLESTERASE INHIBITOR 1); enzyme inhibitor/ pectinesterase/ pectinesterase inhibitor | chr4:7336497-7337356 FORWARD
BnaA09g40170D	-1.35392	26.18	misc.invertase/pectin methylesterase inhibitor family protein	invertase/pectin methylesterase inhibitor family protein | chr3:23229749-23230501 FORWARD
BnaC02g33020D	-6.94642	26.18	misc.invertase/pectin methylesterase inhibitor family protein	invertase/pectin methylesterase inhibitor family protein | chr5:19065453-19066007 REVERSE
BnaC03g49650D	-1.62116	26.18	misc.invertase/pectin methylesterase inhibitor family protein	Symbols: C/VIF2, ATC/VIF2 | C/VIF2 (CELL WALL / VACUOLAR INHIBITOR OF FRUCTOSIDASE 2); enzyme inhibitor/ pectinesterase/ pectinesterase inhibitor | chr5:25831834-25832502 FORWARD
BnaC06g01490D	-2.08765	26.18	misc.invertase/pectin methylesterase inhibitor family protein	Symbols: C/VIF1, ATC/VIF1 | C/VIF1 (CELL WALL / VACUOLAR INHIBITOR OF FRUCTOSIDASE 1); enzyme inhibitor/ pectinesterase/ pectinesterase inhibitor | chr1:17681157-17683629 REVERSE
BnaCnng69780D	2.81961	26.18	misc.invertase/pectin methylesterase inhibitor family protein	invertase/pectin methylesterase inhibitor family protein | chr3:17457795-17458570 FORWARD
BnaA02g35610D	-2.60276	26.19	misc.plastocyanin-like	plastocyanin-like domain-containing protein | chr1:27188066-27189244 FORWARD
BnaA03g05390D	-3.60373	26.19	misc.plastocyanin-like	plastocyanin-like domain-containing protein | chr5:4984959-4986239 REVERSE
BnaA03g20930D	-2.54115	26.19	misc.plastocyanin-like	Symbols: UCC2 | UCC2 (UCLACYANIN 2); copper ion binding / electron carrier | chr2:18461906-18463309 REVERSE
BnaA03g51730D	-1.55574	26.19	misc.plastocyanin-like	plastocyanin-like domain-containing protein | chr4:15401640-15402617 FORWARD
BnaA09g53080D	-3.4187	26.19	misc.plastocyanin-like	plastocyanin-like domain-containing protein | chr1:24022285-24023196 REVERSE
BnaAnng24030D	-3.36923	26.19	misc.plastocyanin-like	plastocyanin-like domain-containing protein | chr1:24022285-24023196 REVERSE
BnaC01g06600D	-2.41913	26.19	misc.plastocyanin-like	plastocyanin-like domain-containing protein | chr4:15401640-15402617 FORWARD
BnaC03g06920D	-3.06584	26.19	misc.plastocyanin-like	plastocyanin-like domain-containing protein | chr5:4984959-4986239 REVERSE
BnaC03g25000D	-2.14914	26.19	misc.plastocyanin-like	Symbols: UCC2 | UCC2 (UCLACYANIN 2); copper ion binding / electron carrier | chr2:18461906-18463309 REVERSE
BnaC06g33270D	-1.39314	26.19	misc.plastocyanin-like	plastocyanin-like domain-containing protein | chr1:27188066-27189244 FORWARD
BnaA09g48860D	1.66539	26.19	misc.plastocyanin-like	plastocyanin-like domain-containing protein | chr1:2689016-2690045 FORWARD
BnaC09g42490D	3.49947	26.19	misc.plastocyanin-like	plastocyanin-like domain-containing protein | chr5:4984959-4986239 REVERSE
BnaA01g16530D	3.91486	26.19	misc.plastocyanin-like	plastocyanin-like domain-containing protein | chr4:13750440-13751905 REVERSE
BnaC01g20120D	4.2959	26.19	misc.plastocyanin-like	plastocyanin-like domain-containing protein | chr4:13750440-13751905 REVERSE
BnaC07g50320D	6.62759	26.19	misc.plastocyanin-like	plastocyanin-like domain-containing protein | chr4:13750440-13751905 REVERSE
BnaA10g15190D	9.6421	26.19	misc.plastocyanin-like	Symbols: ATBCB, BCB | ATBCB (ARABIDOPSIS BLUE-COPPER-BINDING PROTEIN); copper ion binding / electron carrier | chr5:6826506-6827629 FORWARD
BnaC09g37560D	10.1021	26.19	misc.plastocyanin-like	Symbols: ATBCB, BCB | ATBCB (ARABIDOPSIS BLUE-COPPER-BINDING PROTEIN); copper ion binding / electron carrier | chr5:6826506-6827629 FORWARD
BnaA01g05020D	-1.63357	26.19	misc.plastocyanin-like	plastocyanin-like domain-containing protein | chr4:15401640-15402617 FORWARD
BnaA02g31610D	-1.60358	26.19	misc.plastocyanin-like	plastocyanin-like domain-containing protein / mavicyanin, putative | chr5:9241546-9242713 REVERSE
BnaA05g34120D	-3.974	26.19	misc.plastocyanin-like	plastocyanin-like domain-containing protein | chr3:19592-20719 FORWARD
BnaA08g26900D	1.61358	26.19	misc.plastocyanin-like	plastocyanin-like domain-containing protein | chr1:2689016-2690045 FORWARD
BnaA09g41080D	-1.24024	26.19	misc.plastocyanin-like	plastocyanin-like domain-containing protein | chr2:10662241-10663103 FORWARD
BnaC03g26560D	-4	26.19	misc.plastocyanin-like	plastocyanin-like domain-containing protein | chr2:11535650-11536485 FORWARD
BnaC08g43140D	1.24358	26.19	misc.plastocyanin-like	plastocyanin-like domain-containing protein | chr1:2689016-2690045 FORWARD
BnaC09g47900D	9.40939	26.19	misc.plastocyanin-like	plastocyanin-like domain-containing protein | chr5:2364745-2365605 REVERSE
BnaA01g23220D	-1.91355	26.2	misc.UDP glucosyl and glucoronyl transferases	glycosyltransferase family 14 protein / core-2/I-branching enzyme family protein | chr3:8680877-8683289 REVERSE
BnaA01g30130D	-2.05733	26.2	misc.UDP glucosyl and glucoronyl transferases	transferase/ transferase, transferring glycosyl groups | chr2:15981700-15982917 REVERSE
BnaA01g34010D	-1.85872	26.2	misc.UDP glucosyl and glucoronyl transferases	Symbols: UNE7 | UNE7 (unfertilized embryo sac 7); acetylglucosaminyltransferase/ transferase, transferring glycosyl groups | chr3:911238-913677 REVERSE
BnaA02g02630D	-1.38157	26.2	misc.UDP glucosyl and glucoronyl transferases	Symbols: GAUT14 | GAUT14 (Galacturonosyltransferase 14); polygalacturonate 4-alpha-galacturonosyltransferase/ transferase, transferring glycosyl groups / transferase, transferring hexosyl groups | chr5:5021010-5024742 REVERSE
BnaA02g07000D	-2.95109	26.2	misc.UDP glucosyl and glucoronyl transferases	Symbols: UGT76E2 | UGT76E2 (UDP-GLUCOSYL TRANSFERASE 76E2); UDP-glycosyltransferase/ quercetin 3-O-glucosyltransferase/ quercetin 7-O-glucosyltransferase | chr5:24008983-24010649 REVERSE
BnaA02g07200D	-1.97362	26.2	misc.UDP glucosyl and glucoronyl transferases	glycosyl transferase family 1 protein | chr5:23845198-23847393 FORWARD
BnaA03g09390D	-3.42786	26.2	misc.UDP glucosyl and glucoronyl transferases	Symbols: UGT76E2 | UGT76E2 (UDP-GLUCOSYL TRANSFERASE 76E2); UDP-glycosyltransferase/ quercetin 3-O-glucosyltransferase/ quercetin 7-O-glucosyltransferase | chr5:24008983-24010649 REVERSE
BnaA03g26290D	-1.33258	26.2	misc.UDP glucosyl and glucoronyl transferases	Symbols: GATL6, LGT10 | GATL6; polygalacturonate 4-alpha-galacturonosyltransferase/ transferase, transferring glycosyl groups / transferase, transferring hexosyl groups | chr4:944367-947085 REVERSE
BnaA03g26890D	-2.43586	26.2	misc.UDP glucosyl and glucoronyl transferases	transferase, transferring glycosyl groups | chr4:507717-512782 REVERSE
BnaA03g36440D	-2.58322	26.2	misc.UDP glucosyl and glucoronyl transferases	UDP-glucoronosyl/UDP-glucosyl transferase family protein | chr3:7667027-7668724 FORWARD
BnaA03g36450D	-3.08124	26.2	misc.UDP glucosyl and glucoronyl transferases	UDP-glucoronosyl/UDP-glucosyl transferase family protein | chr3:7667027-7668724 FORWARD
BnaA04g07870D	-4.89077	26.2	misc.UDP glucosyl and glucoronyl transferases	exostosin family protein | chr5:14618107-14620282 FORWARD
BnaA04g08660D	-1.16262	26.2	misc.UDP glucosyl and glucoronyl transferases	ALG6, ALG8 glycosyltransferase family protein | chr5:15398284-15401026 REVERSE
BnaA04g09760D	-1.18495	26.2	misc.UDP glucosyl and glucoronyl transferases	glycosyltransferase family 14 protein / core-2/I-branching enzyme family protein | chr5:16004281-16006740 FORWARD
BnaA04g18440D	-3.23732	26.2	misc.UDP glucosyl and glucoronyl transferases	UDP-glucoronosyl/UDP-glucosyl transferase family protein | chr2:13518211-13520364 FORWARD
BnaA04g22110D	-1.62902	26.2	misc.UDP glucosyl and glucoronyl transferases	Symbols: GAUT7, LGT7 | GAUT7 (GALACTURONOSYLTRANSFERASE 7); polygalacturonate 4-alpha-galacturonosyltransferase/ transferase, transferring glycosyl groups | chr2:16161808-16165775 REVERSE
BnaA05g04210D	-1.39677	26.2	misc.UDP glucosyl and glucoronyl transferases	transferase, transferring glycosyl groups / transferase, transferring hexosyl groups | chr2:18420832-18422839 REVERSE
BnaA05g06940D	-2.51576	26.2	misc.UDP glucosyl and glucoronyl transferases	glycosyltransferase family 14 protein / core-2/I-branching enzyme family protein | chr2:15765784-15767878 FORWARD
BnaA05g07450D	-5.06254	26.2	misc.UDP glucosyl and glucoronyl transferases	UDP-glucoronosyl/UDP-glucosyl transferase family protein | chr2:15529006-15530749 FORWARD
BnaA05g07460D	-13.2853	26.2	misc.UDP glucosyl and glucoronyl transferases	UDP-glucoronosyl/UDP-glucosyl transferase family protein | chr2:15529006-15530749 FORWARD
BnaA05g11170D	-4.30633	26.2	misc.UDP glucosyl and glucoronyl transferases	UDP-glucoronosyl/UDP-glucosyl transferase family protein | chr2:13518211-13520364 FORWARD
BnaA05g14870D	-3.45003	26.2	misc.UDP glucosyl and glucoronyl transferases	glycosyl transferase family 1 protein | chr1:19527842-19531287 FORWARD
BnaA05g19480D	-2.61404	26.2	misc.UDP glucosyl and glucoronyl transferases	Symbols: UGT71B1 | UGT71B1 (UDP-GLUCOSYL TRANSFERASE 71B1); UDP-glycosyltransferase/ quercetin 3-O-glucosyltransferase/ transferase, transferring glycosyl groups | chr3:7664345-7666195 FORWARD
BnaA05g23660D	-2.89885	26.2	misc.UDP glucosyl and glucoronyl transferases	glycosyl transferase family 1 protein | chr3:5393513-5396759 REVERSE
BnaA05g29310D	-5.03477	26.2	misc.UDP glucosyl and glucoronyl transferases	alpha 1,4-glycosyltransferase family protein / glycosyltransferase sugar-binding DXD motif-containing protein | chr3:2753307-2754621 FORWARD
BnaA06g12840D	-2.76623	26.2	misc.UDP glucosyl and glucoronyl transferases	transferase/ transferase, transferring glycosyl groups | chr1:6433574-6436922 FORWARD
BnaA06g13870D	-1.63486	26.2	misc.UDP glucosyl and glucoronyl transferases	glycosyl transferase family 1 protein | chr1:6814793-6816876 FORWARD
BnaA06g15190D	-1.41912	26.2	misc.UDP glucosyl and glucoronyl transferases	exostosin family protein | chr1:7518946-7521504 REVERSE
BnaA06g17940D	-2.92283	26.2	misc.UDP glucosyl and glucoronyl transferases	Symbols: UGT76E11 | UGT76E11 (UDP-GLUCOSYL TRANSFERASE 76E11); UDP-glycosyltransferase/ quercetin 3-O-glucosyltransferase/ quercetin 7-O-glucosyltransferase/ transferase, transferring glycosyl groups | chr3:17192589-17194397 REVERSE
BnaA06g21350D	-1.50008	26.2	misc.UDP glucosyl and glucoronyl transferases	Symbols: GUT1 | GUT1; catalytic/ glucuronoxylan glucuronosyltransferase | chr5:24839178-24841940 REVERSE
BnaA06g40930D	-1.32448	26.2	misc.UDP glucosyl and glucoronyl transferases	Symbols: GAUT3 | GAUT3 (Galacturonosyltransferase 3); polygalacturonate 4-alpha-galacturonosyltransferase/ transferase, transferring glycosyl groups | chr4:17938372-17941558 FORWARD
BnaA07g10530D	-6.15563	26.2	misc.UDP glucosyl and glucoronyl transferases	Symbols: AtUGT85A3 | AtUGT85A3 (UDP-glucosyl transferase 85A3); glucuronosyltransferase/ transcription factor/ transferase, transferring glycosyl groups | chr1:7900387-7902332 REVERSE
BnaA07g14860D	-2.32077	26.2	misc.UDP glucosyl and glucoronyl transferases	glycosyltransferase family 14 protein / core-2/I-branching enzyme family protein | chr5:16004281-16006740 FORWARD
BnaA07g29110D	-1.66204	26.2	misc.UDP glucosyl and glucoronyl transferases	glycosyltransferase family 14 protein / core-2/I-branching enzyme family protein | chr1:26807188-26809504 REVERSE
BnaA07g34390D	-1.73222	26.2	misc.UDP glucosyl and glucoronyl transferases	glycosyl transferase family 1 protein | chr1:29625659-29627989 REVERSE
BnaA07g37770D	-4.08406	26.2	misc.UDP glucosyl and glucoronyl transferases	UDP-glucoronosyl/UDP-glucosyl transferase family protein | chr3:20671115-20673372 FORWARD
BnaA08g06450D	-2.32193	26.2	misc.UDP glucosyl and glucoronyl transferases	exostosin family protein | chr1:12492411-12494544 REVERSE
BnaA08g15970D	-1.52326	26.2	misc.UDP glucosyl and glucoronyl transferases	exostosin family protein | chr4:17867438-17869302 FORWARD
BnaA08g21330D	-1.57755	26.2	misc.UDP glucosyl and glucoronyl transferases	exostosin family protein | chr1:7518946-7521504 REVERSE
BnaA08g22570D	-1.32881	26.2	misc.UDP glucosyl and glucoronyl transferases	Symbols: GAUT11 | GAUT11 (Galacturonosyltransferase 11); polygalacturonate 4-alpha-galacturonosyltransferase | chr1:6395864-6398239 FORWARD
BnaA09g23110D	-1.17811	26.2	misc.UDP glucosyl and glucoronyl transferases	exostosin family protein | chr1:12492411-12494544 REVERSE
BnaA09g33410D	-8.1565	26.2	misc.UDP glucosyl and glucoronyl transferases	Symbols: UGT73D1 | UGT73D1 (UDP-glucosyl transferase 73D1); UDP-glycosyltransferase/ transferase, transferring hexosyl groups | chr3:19697736-19699259 REVERSE
BnaA09g33430D	-4.36632	26.2	misc.UDP glucosyl and glucoronyl transferases	Symbols: UGT73D1 | UGT73D1 (UDP-glucosyl transferase 73D1); UDP-glycosyltransferase/ transferase, transferring hexosyl groups | chr3:19697736-19699259 REVERSE
BnaA09g36940D	-3.05188	26.2	misc.UDP glucosyl and glucoronyl transferases	exostosin family protein | chr3:21339302-21343796 REVERSE
BnaA09g42270D	-1.90953	26.2	misc.UDP glucosyl and glucoronyl transferases	galactosyl transferase GMA12/MNN10 family protein | chr2:9744225-9746292 REVERSE
BnaA10g15500D	-1.63336	26.2	misc.UDP glucosyl and glucoronyl transferases	exostosin family protein | chr5:6646719-6649498 FORWARD
BnaA10g24640D	-1.69068	26.2	misc.UDP glucosyl and glucoronyl transferases	UDP-glucoronosyl/UDP-glucosyl transferase family protein | chr5:1769648-1771515 FORWARD
BnaAnng17780D	-3.1375	26.2	misc.UDP glucosyl and glucoronyl transferases	galactosyltransferase family protein | chr5:25136751-25139946 FORWARD
BnaAnng39200D	-3.29956	26.2	misc.UDP glucosyl and glucoronyl transferases	UDP-glucoronosyl/UDP-glucosyl transferase family protein | chr3:20671115-20673372 FORWARD
BnaC01g01010D	-1.09562	26.2	misc.UDP glucosyl and glucoronyl transferases	exostosin family protein | chr4:17867438-17869302 FORWARD
BnaC01g30240D	-1.8842	26.2	misc.UDP glucosyl and glucoronyl transferases	glycosyltransferase family 14 protein / core-2/I-branching enzyme family protein | chr3:8680877-8683289 REVERSE
BnaC01g38080D	-2.20734	26.2	misc.UDP glucosyl and glucoronyl transferases	transferase/ transferase, transferring glycosyl groups | chr2:15981700-15982917 REVERSE
BnaC01g39240D	-2.09311	26.2	misc.UDP glucosyl and glucoronyl transferases	alpha 1,4-glycosyltransferase family protein / glycosyltransferase sugar-binding DXD motif-containing protein | chr3:2753307-2754621 FORWARD
BnaC02g06070D	-2.22329	26.2	misc.UDP glucosyl and glucoronyl transferases	Symbols: GAUT14 | GAUT14 (Galacturonosyltransferase 14); polygalacturonate 4-alpha-galacturonosyltransferase/ transferase, transferring glycosyl groups / transferase, transferring hexosyl groups | chr5:5021010-5024742 REVERSE
BnaC03g31850D	-2.04687	26.2	misc.UDP glucosyl and glucoronyl transferases	transferase, transferring glycosyl groups | chr4:507717-512782 REVERSE
BnaC03g42350D	-4.59026	26.2	misc.UDP glucosyl and glucoronyl transferases	UDP-glucoronosyl/UDP-glucosyl transferase family protein | chr3:7667027-7668724 FORWARD
BnaC03g42360D	-5.0815	26.2	misc.UDP glucosyl and glucoronyl transferases	UDP-glucoronosyl/UDP-glucosyl transferase family protein | chr3:7667027-7668724 FORWARD
BnaC03g61090D	-1.80142	26.2	misc.UDP glucosyl and glucoronyl transferases	exostosin family protein | chr4:17867438-17869302 FORWARD
BnaC03g72160D	-1.48336	26.2	misc.UDP glucosyl and glucoronyl transferases	Symbols: GAUT7, LGT7 | GAUT7 (GALACTURONOSYLTRANSFERASE 7); polygalacturonate 4-alpha-galacturonosyltransferase/ transferase, transferring glycosyl groups | chr2:16161808-16165775 REVERSE
BnaC03g76900D	-1.48696	26.2	misc.UDP glucosyl and glucoronyl transferases	glycosyl transferase-related | chr4:10786948-10791433 REVERSE
BnaC04g05850D	-1.18987	26.2	misc.UDP glucosyl and glucoronyl transferases	glycosyl transferase family 2 protein | chr2:16521744-16524687 REVERSE
BnaC04g06670D	-1.28475	26.2	misc.UDP glucosyl and glucoronyl transferases	Symbols: GAUT7, LGT7 | GAUT7 (GALACTURONOSYLTRANSFERASE 7); polygalacturonate 4-alpha-galacturonosyltransferase/ transferase, transferring glycosyl groups | chr2:16161808-16165775 REVERSE
BnaC04g08270D	-3.51343	26.2	misc.UDP glucosyl and glucoronyl transferases	UDP-glucoronosyl/UDP-glucosyl transferase family protein | chr2:15529006-15530749 FORWARD
BnaC04g30900D	-2.16357	26.2	misc.UDP glucosyl and glucoronyl transferases	ALG6, ALG8 glycosyltransferase family protein | chr5:15398284-15401026 REVERSE
BnaC04g31930D	-1.30355	26.2	misc.UDP glucosyl and glucoronyl transferases	glycosyltransferase family 14 protein / core-2/I-branching enzyme family protein | chr5:16004281-16006740 FORWARD
BnaC04g41310D	-2.47131	26.2	misc.UDP glucosyl and glucoronyl transferases	Symbols: GAUT5, LGT5 | LGT5 (LOS GLYCOSYLTRANSFERASE 5); polygalacturonate 4-alpha-galacturonosyltransferase/ transferase, transferring glycosyl groups | chr2:13020397-13024208 REVERSE
BnaC04g42530D	-2.95668	26.2	misc.UDP glucosyl and glucoronyl transferases	UDP-glucoronosyl/UDP-glucosyl transferase family protein | chr2:13518211-13520364 FORWARD
BnaC04g45840D	-2.27782	26.2	misc.UDP glucosyl and glucoronyl transferases	Symbols: GAUT7, LGT7 | GAUT7 (GALACTURONOSYLTRANSFERASE 7); polygalacturonate 4-alpha-galacturonosyltransferase/ transferase, transferring glycosyl groups | chr2:16161808-16165775 REVERSE
BnaC05g15290D	-1.16156	26.2	misc.UDP glucosyl and glucoronyl transferases	glycosyl transferase family 1 protein | chr1:6814793-6816876 FORWARD
BnaC05g16670D	-1.06156	26.2	misc.UDP glucosyl and glucoronyl transferases	exostosin family protein | chr1:7518946-7521504 REVERSE
BnaC05g37410D	-2.71425	26.2	misc.UDP glucosyl and glucoronyl transferases	glycosyl transferase family 1 protein | chr3:5393513-5396759 REVERSE
BnaC06g04480D	-4.5431	26.2	misc.UDP glucosyl and glucoronyl transferases	UDP-glucoronosyl/UDP-glucosyl transferase family protein | chr1:18987809-18989110 FORWARD
BnaC06g09690D	-3.39296	26.2	misc.UDP glucosyl and glucoronyl transferases	glycosyl transferase family 1 protein | chr1:19527842-19531287 FORWARD
BnaC06g12760D	-1.51345	26.2	misc.UDP glucosyl and glucoronyl transferases	glycosyltransferase family 14 protein / core-2/I-branching enzyme family protein | chr5:16004281-16006740 FORWARD
BnaC06g15670D	-3.61285	26.2	misc.UDP glucosyl and glucoronyl transferases	UDP-glucoronosyl/UDP-glucosyl transferase family protein | chr3:20671115-20673372 FORWARD
BnaC06g22840D	-2.19902	26.2	misc.UDP glucosyl and glucoronyl transferases	exostosin family protein | chr1:28059188-28061119 FORWARD
BnaC06g32220D	-2.46419	26.2	misc.UDP glucosyl and glucoronyl transferases	glycosyltransferase family 14 protein / core-2/I-branching enzyme family protein | chr1:26807188-26809504 REVERSE
BnaC06g39220D	-1.69455	26.2	misc.UDP glucosyl and glucoronyl transferases	glycosyl transferase family 1 protein | chr1:29625659-29627989 REVERSE
BnaC07g11500D	-1.60742	26.2	misc.UDP glucosyl and glucoronyl transferases	Symbols: GUT2, IRX10, ATGUT1 | GUT2; catalytic/ glucuronoxylan glucuronosyltransferase | chr1:9529141-9531375 REVERSE
BnaC07g16120D	-2.51972	26.2	misc.UDP glucosyl and glucoronyl transferases	glycosyl transferase family 43 protein | chr5:26822478-26824328 FORWARD
BnaC07g50050D	-1.97909	26.2	misc.UDP glucosyl and glucoronyl transferases	glucosyltransferase-related | chr4:8716601-8717796 REVERSE
BnaC08g07020D	-2.07622	26.2	misc.UDP glucosyl and glucoronyl transferases	exostosin family protein | chr1:12492411-12494544 REVERSE
BnaC08g19800D	-2.06771	26.2	misc.UDP glucosyl and glucoronyl transferases	exostosin family protein | chr1:7518946-7521504 REVERSE
BnaC08g20240D	-3.55695	26.2	misc.UDP glucosyl and glucoronyl transferases	galactosyltransferase family protein | chr1:9421177-9424069 FORWARD
BnaC08g24240D	-1.51539	26.2	misc.UDP glucosyl and glucoronyl transferases	Symbols: UGT73D1 | UGT73D1 (UDP-glucosyl transferase 73D1); UDP-glycosyltransferase/ transferase, transferring hexosyl groups | chr3:19697736-19699259 REVERSE
BnaC08g26630D	-3.33738	26.2	misc.UDP glucosyl and glucoronyl transferases	UDP-glucoronosyl/UDP-glucosyl transferase family protein | chr3:20671115-20673372 FORWARD
BnaC08g28640D	-3.34356	26.2	misc.UDP glucosyl and glucoronyl transferases	exostosin family protein | chr3:21339302-21343796 REVERSE
BnaC08g34730D	-1.33472	26.2	misc.UDP glucosyl and glucoronyl transferases	galactosyl transferase GMA12/MNN10 family protein | chr2:9744225-9746292 REVERSE
BnaC09g10660D	-3.24462	26.2	misc.UDP glucosyl and glucoronyl transferases	Symbols: GAUT15 | GAUT15 (Galacturonosyltransferase 15); polygalacturonate 4-alpha-galacturonosyltransferase/ transferase, transferring glycosyl groups / transferase, transferring hexosyl groups | chr3:21742071-21746324 REVERSE
BnaC09g49560D	-2.04072	26.2	misc.UDP glucosyl and glucoronyl transferases	UDP-glucoronosyl/UDP-glucosyl transferase family protein | chr5:1772543-1774113 FORWARD
BnaC09g54350D	-1.57347	26.2	misc.UDP glucosyl and glucoronyl transferases	glycosyltransferase family protein 2 | chr5:24402129-24404948 REVERSE
BnaCnng07110D	-8.85591	26.2	misc.UDP glucosyl and glucoronyl transferases	Symbols: UGT71B1 | UGT71B1 (UDP-GLUCOSYL TRANSFERASE 71B1); UDP-glycosyltransferase/ quercetin 3-O-glucosyltransferase/ transferase, transferring glycosyl groups | chr3:7664345-7666195 FORWARD
BnaCnng24210D	-2.58066	26.2	misc.UDP glucosyl and glucoronyl transferases	alpha 1,4-glycosyltransferase family protein / glycosyltransferase sugar-binding DXD motif-containing protein | chr3:2753307-2754621 FORWARD
BnaCnng25370D	-4.11548	26.2	misc.UDP glucosyl and glucoronyl transferases	exostosin family protein | chr5:14618107-14620282 FORWARD
BnaCnng34200D	-1.61607	26.2	misc.UDP glucosyl and glucoronyl transferases	Symbols: GAUT3 | GAUT3 (Galacturonosyltransferase 3); polygalacturonate 4-alpha-galacturonosyltransferase/ transferase, transferring glycosyl groups | chr4:17938372-17941558 FORWARD
BnaCnng37570D	-3.76694	26.2	misc.UDP glucosyl and glucoronyl transferases	Symbols: UGT76E11 | UGT76E11 (UDP-GLUCOSYL TRANSFERASE 76E11); UDP-glycosyltransferase/ quercetin 3-O-glucosyltransferase/ quercetin 7-O-glucosyltransferase/ transferase, transferring glycosyl groups | chr3:17192589-17194397 REVERSE
BnaCnng43180D	-1.68544	26.2	misc.UDP glucosyl and glucoronyl transferases	glycosyltransferase family 14 protein / core-2/I-branching enzyme family protein | chr1:877862-880158 REVERSE
BnaCnng45020D	-1.43741	26.2	misc.UDP glucosyl and glucoronyl transferases	Symbols: GATL6, LGT10 | GATL6; polygalacturonate 4-alpha-galacturonosyltransferase/ transferase, transferring glycosyl groups / transferase, transferring hexosyl groups | chr4:944367-947085 REVERSE
BnaC04g08280D	1.12465	26.2	misc.UDP glucosyl and glucoronyl transferases	UDP-glucoronosyl/UDP-glucosyl transferase family protein | chr2:15529006-15530749 FORWARD
BnaC03g42410D	1.21119	26.2	misc.UDP glucosyl and glucoronyl transferases	UDP-glucoronosyl/UDP-glucosyl transferase family protein | chr3:7676927-7678414 REVERSE
BnaA08g11390D	1.24726	26.2	misc.UDP glucosyl and glucoronyl transferases	Symbols: UGT73B3 | UGT73B3 (UDP-glucosyl transferase 73B3); UDP-glycosyltransferase/ abscisic acid glucosyltransferase/ quercetin 3-O-glucosyltransferase/ transferase, transferring hexosyl groups | chr4:16343057-16344818 REVERSE
BnaC01g31890D	1.28472	26.2	misc.UDP glucosyl and glucoronyl transferases	Symbols: UGT84A2 | UGT84A2; UDP-glycosyltransferase/ sinapate 1-glucosyltransferase | chr3:7595806-7597577 FORWARD
BnaC03g06960D	1.30848	26.2	misc.UDP glucosyl and glucoronyl transferases	Symbols: GAUT14 | GAUT14 (Galacturonosyltransferase 14); polygalacturonate 4-alpha-galacturonosyltransferase/ transferase, transferring glycosyl groups / transferase, transferring hexosyl groups | chr5:5021010-5024742 REVERSE
BnaC05g30670D	1.36347	26.2	misc.UDP glucosyl and glucoronyl transferases	Symbols: UGT84A2 | UGT84A2; UDP-glycosyltransferase/ sinapate 1-glucosyltransferase | chr3:7595806-7597577 FORWARD
BnaA08g14250D	1.40488	26.2	misc.UDP glucosyl and glucoronyl transferases	galactosyltransferase family protein | chr4:13529425-13532699 REVERSE
BnaA03g13740D	1.45765	26.2	misc.UDP glucosyl and glucoronyl transferases	UDP-glucoronosyl/UDP-glucosyl transferase family protein | chr2:12872134-12873820 FORWARD
BnaC04g10300D	1.46136	26.2	misc.UDP glucosyl and glucoronyl transferases	UTP--glucose-1-phosphate uridylyltransferase family protein | chr2:14756711-14760706 FORWARD
BnaC08g45200D	1.53983	26.2	misc.UDP glucosyl and glucoronyl transferases	Symbols: UGT71C4 | UGT71C4 (UDP-GLUCOSYL TRANSFERASE 71C4); quercetin 3-O-glucosyltransferase/ quercetin 7-O-glucosyltransferase/ transferase, transferring glycosyl groups | chr1:2225900-2227566 FORWARD
BnaA03g05430D	1.59091	26.2	misc.UDP glucosyl and glucoronyl transferases	Symbols: GAUT14 | GAUT14 (Galacturonosyltransferase 14); polygalacturonate 4-alpha-galacturonosyltransferase/ transferase, transferring glycosyl groups / transferase, transferring hexosyl groups | chr5:5021010-5024742 REVERSE
BnaA05g19630D	1.61444	26.2	misc.UDP glucosyl and glucoronyl transferases	Symbols: UGT84A2 | UGT84A2; UDP-glycosyltransferase/ sinapate 1-glucosyltransferase | chr3:7595806-7597577 FORWARD
BnaC07g12870D	1.70085	26.2	misc.UDP glucosyl and glucoronyl transferases	Symbols: GATL8, LGT9 | LGT9; polygalacturonate 4-alpha-galacturonosyltransferase/ transferase, transferring glycosyl groups / transferase, transferring hexosyl groups | chr1:8557216-8558832 REVERSE
BnaCnng43810D	1.83329	26.2	misc.UDP glucosyl and glucoronyl transferases	Symbols: UGT74D1 | UGT74D1 (UDP-glucosyl transferase 74D1); UDP-glycosyltransferase/ abscisic acid glucosyltransferase/ transferase, transferring glycosyl groups / transferase, transferring hexosyl groups | chr2:13497233-13500023 FORWARD
BnaA07g22470D	1.91078	26.2	misc.UDP glucosyl and glucoronyl transferases	Symbols: UGT89B1 | UGT89B1 (UDP-GLUCOSYL TRANSFERASE 89B1); UDP-glycosyltransferase/ quercetin 3-O-glucosyltransferase/ quercetin 4'-O-glucosyltransferase/ quercetin 7-O-glucosyltransferase/ transferase, transferring glycosyl groups / transferase, transferring hexosyl group | chr1:27784981-27786804 FORWARD
BnaC03g16650D	2.02831	26.2	misc.UDP glucosyl and glucoronyl transferases	UDP-glucoronosyl/UDP-glucosyl transferase family protein | chr2:12872134-12873820 FORWARD
BnaA10g18710D	2.05134	26.2	misc.UDP glucosyl and glucoronyl transferases	Symbols: GAUT14 | GAUT14 (Galacturonosyltransferase 14); polygalacturonate 4-alpha-galacturonosyltransferase/ transferase, transferring glycosyl groups / transferase, transferring hexosyl groups | chr5:5021010-5024742 REVERSE
BnaA08g07500D	2.13503	26.2	misc.UDP glucosyl and glucoronyl transferases	exostosin family protein | chr4:8084395-8086095 FORWARD
BnaC03g46720D	2.28693	26.2	misc.UDP glucosyl and glucoronyl transferases	UDP-glucoronosyl/UDP-glucosyl transferase family protein | chr2:7316889-7319181 FORWARD
BnaA06g20500D	2.3596	26.2	misc.UDP glucosyl and glucoronyl transferases	Symbols: UGT76E11 | UGT76E11 (UDP-GLUCOSYL TRANSFERASE 76E11); UDP-glycosyltransferase/ quercetin 3-O-glucosyltransferase/ quercetin 7-O-glucosyltransferase/ transferase, transferring glycosyl groups | chr3:17192589-17194397 REVERSE
BnaA07g09060D	2.37872	26.2	misc.UDP glucosyl and glucoronyl transferases	Symbols: GATL8, LGT9 | LGT9; polygalacturonate 4-alpha-galacturonosyltransferase/ transferase, transferring glycosyl groups / transferase, transferring hexosyl groups | chr1:8557216-8558832 REVERSE
BnaC08g12360D	2.47216	26.2	misc.UDP glucosyl and glucoronyl transferases	galactosyltransferase family protein | chr4:13529425-13532699 REVERSE
BnaCnng47000D	2.47731	26.2	misc.UDP glucosyl and glucoronyl transferases	exostosin family protein | chr4:8084395-8086095 FORWARD
BnaC05g19620D	2.58583	26.2	misc.UDP glucosyl and glucoronyl transferases	galactosyltransferase family protein | chr1:9421177-9424069 FORWARD
BnaC06g16920D	2.58848	26.2	misc.UDP glucosyl and glucoronyl transferases	Symbols: GAUT15 | GAUT15 (Galacturonosyltransferase 15); polygalacturonate 4-alpha-galacturonosyltransferase/ transferase, transferring glycosyl groups / transferase, transferring hexosyl groups | chr3:21742071-21746324 REVERSE
BnaAnng15830D	2.63013	26.2	misc.UDP glucosyl and glucoronyl transferases	Symbols: UGT71C4 | UGT71C4 (UDP-GLUCOSYL TRANSFERASE 71C4); quercetin 3-O-glucosyltransferase/ quercetin 7-O-glucosyltransferase/ transferase, transferring glycosyl groups | chr1:2225900-2227566 FORWARD
BnaC05g19300D	2.63275	26.2	misc.UDP glucosyl and glucoronyl transferases	Symbols: GATL8, LGT9 | LGT9; polygalacturonate 4-alpha-galacturonosyltransferase/ transferase, transferring glycosyl groups / transferase, transferring hexosyl groups | chr1:8557216-8558832 REVERSE
BnaA01g24990D	2.64895	26.2	misc.UDP glucosyl and glucoronyl transferases	Symbols: UGT84A2 | UGT84A2; UDP-glycosyltransferase/ sinapate 1-glucosyltransferase | chr3:7595806-7597577 FORWARD
BnaA09g29710D	2.66841	26.2	misc.UDP glucosyl and glucoronyl transferases	Symbols: GATL8, LGT9 | LGT9; polygalacturonate 4-alpha-galacturonosyltransferase/ transferase, transferring glycosyl groups / transferase, transferring hexosyl groups | chr1:8557216-8558832 REVERSE
BnaC03g51850D	2.81236	26.2	misc.UDP glucosyl and glucoronyl transferases	exostosin family protein | chr5:24988456-24990009 REVERSE
BnaC05g14260D	2.83767	26.2	misc.UDP glucosyl and glucoronyl transferases	Symbols: GAUT11 | GAUT11 (Galacturonosyltransferase 11); polygalacturonate 4-alpha-galacturonosyltransferase | chr1:6395864-6398239 FORWARD
BnaA06g21680D	2.92882	26.2	misc.UDP glucosyl and glucoronyl transferases	exostosin family protein | chr5:24988456-24990009 REVERSE
BnaA07g28600D	3.04347	26.2	misc.UDP glucosyl and glucoronyl transferases	Symbols: GATL9, LGT8 | LGT8 (GLUCOSYL TRANSFERASE FAMILY 8); polygalacturonate 4-alpha-galacturonosyltransferase/ transferase, transferring glycosyl groups / transferase, transferring hexosyl groups | chr1:26400790-26402397 FORWARD
BnaA07g18060D	3.09264	26.2	misc.UDP glucosyl and glucoronyl transferases	Symbols: GAUT15 | GAUT15 (Galacturonosyltransferase 15); polygalacturonate 4-alpha-galacturonosyltransferase/ transferase, transferring glycosyl groups / transferase, transferring hexosyl groups | chr3:21742071-21746324 REVERSE
BnaA01g23020D	3.40939	26.2	misc.UDP glucosyl and glucoronyl transferases	Symbols: UGT75B2, UGT2 | UGT75B2 (UDP-GLUCOSYL TRANSFERASE 75B2); UDP-glucosyltransferase/ UDP-glycosyltransferase/ abscisic acid glucosyltransferase/ transferase, transferring glycosyl groups | chr1:1636496-1637863 REVERSE
BnaC09g42440D	3.4795	26.2	misc.UDP glucosyl and glucoronyl transferases	Symbols: GAUT14 | GAUT14 (Galacturonosyltransferase 14); polygalacturonate 4-alpha-galacturonosyltransferase/ transferase, transferring glycosyl groups / transferase, transferring hexosyl groups | chr5:5021010-5024742 REVERSE
BnaA03g40930D	3.56346	26.2	misc.UDP glucosyl and glucoronyl transferases	Symbols: GATL2 | GATL2 (Galacturonosyltransferase-like 2); polygalacturonate 4-alpha-galacturonosyltransferase/ transferase, transferring glycosyl groups / transferase, transferring hexosyl groups | chr3:18868065-18869384 FORWARD
BnaA05g32810D	3.70917	26.2	misc.UDP glucosyl and glucoronyl transferases	Symbols: EDA5 | EDA5 (embryo sac development arrest 5); catalytic | chr3:884133-886410 REVERSE
BnaC07g49990D	3.796	26.2	misc.UDP glucosyl and glucoronyl transferases	Symbols: GATL2 | GATL2 (Galacturonosyltransferase-like 2); polygalacturonate 4-alpha-galacturonosyltransferase/ transferase, transferring glycosyl groups / transferase, transferring hexosyl groups | chr3:18868065-18869384 FORWARD
BnaCnng62810D	3.9542	26.2	misc.UDP glucosyl and glucoronyl transferases	Symbols: UGT74D1 | UGT74D1 (UDP-glucosyl transferase 74D1); UDP-glycosyltransferase/ abscisic acid glucosyltransferase/ transferase, transferring glycosyl groups / transferase, transferring hexosyl groups | chr2:13497233-13500023 FORWARD
BnaCnng03910D	3.96413	26.2	misc.UDP glucosyl and glucoronyl transferases	alpha 1,4-glycosyltransferase family protein / glycosyltransferase sugar-binding DXD motif-containing protein | chr5:102293-103770 REVERSE
BnaC06g31180D	3.98059	26.2	misc.UDP glucosyl and glucoronyl transferases	Symbols: GATL9, LGT8 | LGT8 (GLUCOSYL TRANSFERASE FAMILY 8); polygalacturonate 4-alpha-galacturonosyltransferase/ transferase, transferring glycosyl groups / transferase, transferring hexosyl groups | chr1:26400790-26402397 FORWARD
BnaA09g29530D	3.99341	26.2	misc.UDP glucosyl and glucoronyl transferases	galactosyltransferase family protein | chr1:9421177-9424069 FORWARD
BnaC04g08460D	4.33342	26.2	misc.UDP glucosyl and glucoronyl transferases	UDP-glucoronosyl/UDP-glucosyl transferase family protein | chr2:15415139-15416766 REVERSE
BnaA01g03020D	4.34466	26.2	misc.UDP glucosyl and glucoronyl transferases	Symbols: UGT73B3 | UGT73B3 (UDP-glucosyl transferase 73B3); UDP-glycosyltransferase/ abscisic acid glucosyltransferase/ quercetin 3-O-glucosyltransferase/ transferase, transferring hexosyl groups | chr4:16343057-16344818 REVERSE
BnaA05g07600D	4.62372	26.2	misc.UDP glucosyl and glucoronyl transferases	UDP-glucoronosyl/UDP-glucosyl transferase family protein | chr2:15415139-15416766 REVERSE
BnaC01g04250D	5.37643	26.2	misc.UDP glucosyl and glucoronyl transferases	Symbols: UGT73B3 | UGT73B3 (UDP-glucosyl transferase 73B3); UDP-glycosyltransferase/ abscisic acid glucosyltransferase/ quercetin 3-O-glucosyltransferase/ transferase, transferring hexosyl groups | chr4:16343057-16344818 REVERSE
BnaA03g41940D	5.84042	26.2	misc.UDP glucosyl and glucoronyl transferases	Symbols: UGT84A1 | UGT84A1; UDP-glycosyltransferase/ sinapate 1-glucosyltransferase/ transferase, transferring glycosyl groups | chr4:8848801-8850516 REVERSE
BnaC03g17740D	8.50515	26.2	misc.UDP glucosyl and glucoronyl transferases	Symbols: UGT74D1 | UGT74D1 (UDP-glucosyl transferase 74D1); UDP-glycosyltransferase/ abscisic acid glucosyltransferase/ transferase, transferring glycosyl groups / transferase, transferring hexosyl groups | chr2:13497233-13500023 FORWARD
BnaA01g12310D	-1.3704	26.2	misc.UDP glucosyl and glucoronyl transferases	exostosin family protein | chr4:11889098-11890725 REVERSE
BnaA01g18400D	-1.10932	26.2	misc.UDP glucosyl and glucoronyl transferases	Symbols: IAGLU | IAGLU (INDOLE-3-ACETATE BETA-D-GLUCOSYLTRANSFERASE); UDP-glycosyltransferase/ transferase, transferring glycosyl groups | chr4:8877590-8879327 REVERSE
BnaA01g18540D	-7.35168	26.2	misc.UDP glucosyl and glucoronyl transferases	Symbols: UGT84A1 | UGT84A1; UDP-glycosyltransferase/ sinapate 1-glucosyltransferase/ transferase, transferring glycosyl groups | chr4:8848801-8850516 REVERSE
BnaA01g19890D	-2.8529	26.2	misc.UDP glucosyl and glucoronyl transferases	Symbols: UGT76E11 | UGT76E11 (UDP-GLUCOSYL TRANSFERASE 76E11); UDP-glycosyltransferase/ quercetin 3-O-glucosyltransferase/ quercetin 7-O-glucosyltransferase/ transferase, transferring glycosyl groups | chr3:17192589-17194397 REVERSE
BnaA02g02460D	1.01321	26.2	misc.UDP glucosyl and glucoronyl transferases	glycosyltransferase family 14 protein / core-2/I-branching enzyme family protein | chr5:4871639-4873598 REVERSE
BnaA02g06160D	2.11548	26.2	misc.UDP glucosyl and glucoronyl transferases	glycosyltransferase family protein 2 | chr5:24402129-24404948 REVERSE
BnaA02g19840D	-1.59012	26.2	misc.UDP glucosyl and glucoronyl transferases	glycosyltransferase family protein 47 | chr1:30188364-30189574 FORWARD
BnaA02g20470D	-2.1622	26.2	misc.UDP glucosyl and glucoronyl transferases	Symbols: GATL6, LGT10 | GATL6; polygalacturonate 4-alpha-galacturonosyltransferase/ transferase, transferring glycosyl groups / transferase, transferring hexosyl groups | chr4:944367-947085 REVERSE
BnaA03g13730D	9.58246	26.2	misc.UDP glucosyl and glucoronyl transferases	UDP-glucoronosyl/UDP-glucosyl transferase family protein | chr2:12872134-12873820 FORWARD
BnaA03g16080D	1.52497	26.2	misc.UDP glucosyl and glucoronyl transferases	Symbols: ARAD1 | ARAD1 (ARABINAN DEFICIENT 1); catalytic/ transferase, transferring glycosyl groups | chr2:14793651-14795629 REVERSE
BnaA03g39380D	-1.64345	26.2	misc.UDP glucosyl and glucoronyl transferases	UDP-glucoronosyl/UDP-glucosyl transferase family protein | chr2:7316889-7319181 FORWARD
BnaA03g48330D	-1.54432	26.2	misc.UDP glucosyl and glucoronyl transferases	galactosyltransferase family protein | chr4:13529425-13532699 REVERSE
BnaA04g15310D	-1.09107	26.2	misc.UDP glucosyl and glucoronyl transferases	galactosyltransferase family protein | chr2:11115905-11118208 REVERSE
BnaA04g17670D	-1.50826	26.2	misc.UDP glucosyl and glucoronyl transferases	Symbols: GAUT5, LGT5 | LGT5 (LOS GLYCOSYLTRANSFERASE 5); polygalacturonate 4-alpha-galacturonosyltransferase/ transferase, transferring glycosyl groups | chr2:13020397-13024208 REVERSE
BnaA04g19030D	-1.24424	26.2	misc.UDP glucosyl and glucoronyl transferases	exostosin family protein | chr2:13886826-13888232 FORWARD
BnaA05g19520D	-6.86625	26.2	misc.UDP glucosyl and glucoronyl transferases	Symbols: UGT71B1 | UGT71B1 (UDP-GLUCOSYL TRANSFERASE 71B1); UDP-glycosyltransferase/ quercetin 3-O-glucosyltransferase/ transferase, transferring glycosyl groups | chr3:7664345-7666195 FORWARD
BnaA05g23290D	-1.26709	26.2	misc.UDP glucosyl and glucoronyl transferases	Symbols: UGT88A1 | UDP-glucoronosyl/UDP-glucosyl transferase family protein | chr3:5619128-5620873 REVERSE
BnaA05g34160D	-7.64386	26.2	misc.UDP glucosyl and glucoronyl transferases	UDP-glucoronosyl/UDP-glucosyl transferase family protein | chr3:368840-370484 REVERSE
BnaA05g34710D	-1.79518	26.2	misc.UDP glucosyl and glucoronyl transferases	glycosyl transferase family 2 protein | chr2:16521744-16524687 REVERSE
BnaA06g12710D	1.36026	26.2	misc.UDP glucosyl and glucoronyl transferases	Symbols: GAUT11 | GAUT11 (Galacturonosyltransferase 11); polygalacturonate 4-alpha-galacturonosyltransferase | chr1:6395864-6398239 FORWARD
BnaA06g17040D	-6.49185	26.2	misc.UDP glucosyl and glucoronyl transferases	galactosyltransferase family protein | chr5:25136751-25139946 FORWARD
BnaA06g17930D	-2.39626	26.2	misc.UDP glucosyl and glucoronyl transferases	UDP-glucoronosyl/UDP-glucosyl transferase family protein | chr3:17210855-17212348 REVERSE
BnaA06g27910D	1.1711	26.2	misc.UDP glucosyl and glucoronyl transferases	exostosin family protein | chr5:8997183-9000329 REVERSE
BnaA07g04240D	1.16466	26.2	misc.UDP glucosyl and glucoronyl transferases	Symbols: UGT73B5 | UGT73B5 (UDP-glucosyl transferase 73B5); UDP-glucosyltransferase/ UDP-glycosyltransferase/ quercetin 3-O-glucosyltransferase/ transferase, transferring glycosyl groups | chr2:6758681-6760633 FORWARD
BnaA07g19370D	-1.54251	26.2	misc.UDP glucosyl and glucoronyl transferases	Symbols: GATL7 | GATL7 (Galacturonosyltransferase-like 7); polygalacturonate 4-alpha-galacturonosyltransferase/ transferase, transferring glycosyl groups / transferase, transferring hexosyl groups | chr3:23172806-23174762 FORWARD
BnaA07g22100D	-1.63227	26.2	misc.UDP glucosyl and glucoronyl transferases	exostosin family protein | chr1:28059188-28061119 FORWARD
BnaA07g22270D	1.57653	26.2	misc.UDP glucosyl and glucoronyl transferases	Symbols: XXT5 | XXT5 (XYLOGLUCAN XYLOSYLTRANSFERASE 5); transferase/ transferase, transferring glycosyl groups / xyloglucan 6-xylosyltransferase | chr1:27959578-27961454 FORWARD
BnaA07g22280D	1.43192	26.2	misc.UDP glucosyl and glucoronyl transferases	Symbols: XXT5 | XXT5 (XYLOGLUCAN XYLOSYLTRANSFERASE 5); transferase/ transferase, transferring glycosyl groups / xyloglucan 6-xylosyltransferase | chr1:27959578-27961454 FORWARD
BnaA07g23660D	2.21928	26.2	misc.UDP glucosyl and glucoronyl transferases	glycosyltransferase family 14 protein / core-2/I-branching enzyme family protein | chr1:26807188-26809504 REVERSE
BnaA07g27130D	1.32729	26.2	misc.UDP glucosyl and glucoronyl transferases	exostosin family protein | chr1:25676395-25678288 REVERSE
BnaA07g31510D	1.09886	26.2	misc.UDP glucosyl and glucoronyl transferases	Symbols: XXT5 | XXT5 (XYLOGLUCAN XYLOSYLTRANSFERASE 5); transferase/ transferase, transferring glycosyl groups / xyloglucan 6-xylosyltransferase | chr1:27959578-27961454 FORWARD
BnaA08g05710D	-4.77818	26.2	misc.UDP glucosyl and glucoronyl transferases	Symbols: IAGLU | IAGLU (INDOLE-3-ACETATE BETA-D-GLUCOSYLTRANSFERASE); UDP-glycosyltransferase/ transferase, transferring glycosyl groups | chr4:8877590-8879327 REVERSE
BnaA08g11370D	-1.48708	26.2	misc.UDP glucosyl and glucoronyl transferases	Symbols: UGT73B1 | UGT73B1 (UDP-glucosyl transferase 73B1); UDP-glycosyltransferase/ abscisic acid glucosyltransferase/ quercetin 3-O-glucosyltransferase/ quercetin 7-O-glucosyltransferase | chr4:16348106-16349982 REVERSE
BnaA08g12020D	-1.99202	26.2	misc.UDP glucosyl and glucoronyl transferases	exostosin family protein | chr4:15812566-15814987 FORWARD
BnaA08g20880D	-2.30968	26.2	misc.UDP glucosyl and glucoronyl transferases	Symbols: AtUGT85A2 | AtUGT85A2 (UDP-glucosyl transferase 85A2); UDP-glycosyltransferase/ glucuronosyltransferase/ transferase, transferring glycosyl groups | chr1:7894858-7897591 REVERSE
BnaA09g00140D	-1.36911	26.2	misc.UDP glucosyl and glucoronyl transferases	transferase, transferring glycosyl groups | chr4:507717-512782 REVERSE
BnaA09g35290D	-2.48308	26.2	misc.UDP glucosyl and glucoronyl transferases	UDP-glucoronosyl/UDP-glucosyl transferase family protein | chr3:20671115-20673372 FORWARD
BnaA09g55340D	1.4428	26.2	misc.UDP glucosyl and glucoronyl transferases	Symbols: GAUT15 | GAUT15 (Galacturonosyltransferase 15); polygalacturonate 4-alpha-galacturonosyltransferase/ transferase, transferring glycosyl groups / transferase, transferring hexosyl groups | chr3:21742071-21746324 REVERSE
BnaA09g55800D	2.10128	26.2	misc.UDP glucosyl and glucoronyl transferases	Symbols: UGT71C3 | UGT71C3 (UDP-GLUCOSYL TRANSFERASE 71C3); UDP-glycosyltransferase/ quercetin 3-O-glucosyltransferase/ transferase, transferring glycosyl groups | chr1:2227594-2229319 REVERSE
BnaA10g01980D	-1.503	26.2	misc.UDP glucosyl and glucoronyl transferases	glycosyltransferase family 14 protein / core-2/I-branching enzyme family protein | chr1:877862-880158 REVERSE
BnaA10g04710D	-2.40372	26.2	misc.UDP glucosyl and glucoronyl transferases	Symbols: UGT71C3 | UGT71C3 (UDP-GLUCOSYL TRANSFERASE 71C3); UDP-glycosyltransferase/ quercetin 3-O-glucosyltransferase/ transferase, transferring glycosyl groups | chr1:2227594-2229319 REVERSE
BnaA10g13530D	-2.28011	26.2	misc.UDP glucosyl and glucoronyl transferases	glycosyltransferase family protein 2 | chr5:24402129-24404948 REVERSE
BnaA10g19040D	-1.31171	26.2	misc.UDP glucosyl and glucoronyl transferases	transferase, transferring glycosyl groups | chr5:4805887-4807759 FORWARD
BnaAnng31440D	-3.38957	26.2	misc.UDP glucosyl and glucoronyl transferases	exostosin family protein | chr2:13611351-13613573 REVERSE
BnaC01g06350D	-1.13136	26.2	misc.UDP glucosyl and glucoronyl transferases	galactosyltransferase family protein | chr4:15516784-15519855 REVERSE
BnaC01g31820D	-2.80579	26.2	misc.UDP glucosyl and glucoronyl transferases	UDP-glucoronosyl/UDP-glucosyl transferase family protein | chr3:7667027-7668724 FORWARD
BnaC01g40560D	-1.69188	26.2	misc.UDP glucosyl and glucoronyl transferases	Symbols: UNE7 | UNE7 (unfertilized embryo sac 7); acetylglucosaminyltransferase/ transferase, transferring glycosyl groups | chr3:911238-913677 REVERSE
BnaC01g41850D	-4.27448	26.2	misc.UDP glucosyl and glucoronyl transferases	Symbols: IAGLU | IAGLU (INDOLE-3-ACETATE BETA-D-GLUCOSYLTRANSFERASE); UDP-glycosyltransferase/ transferase, transferring glycosyl groups | chr4:8877590-8879327 REVERSE
BnaC02g09890D	-3.90689	26.2	misc.UDP glucosyl and glucoronyl transferases	Symbols: UGT76E2 | UGT76E2 (UDP-GLUCOSYL TRANSFERASE 76E2); UDP-glycosyltransferase/ quercetin 3-O-glucosyltransferase/ quercetin 7-O-glucosyltransferase | chr5:24008983-24010649 REVERSE
BnaC02g20540D	-1.22689	26.2	misc.UDP glucosyl and glucoronyl transferases	glycosyltransferase family 14 protein / core-2/I-branching enzyme family protein | chr1:26807188-26809504 REVERSE
BnaC02g24920D	1.31529	26.2	misc.UDP glucosyl and glucoronyl transferases	Symbols: AtUGT85A4 | AtUGT85A4 (UDP-glucosyl transferase 85A4); UDP-glycosyltransferase/ glucuronosyltransferase/ transferase, transferring hexosyl groups | chr1:29450563-29452417 REVERSE
BnaC03g11820D	-1.20425	26.2	misc.UDP glucosyl and glucoronyl transferases	Symbols: UGT76E2 | UGT76E2 (UDP-GLUCOSYL TRANSFERASE 76E2); UDP-glycosyltransferase/ quercetin 3-O-glucosyltransferase/ quercetin 7-O-glucosyltransferase | chr5:24008983-24010649 REVERSE
BnaC04g05050D	-1.91467	26.2	misc.UDP glucosyl and glucoronyl transferases	transferase, transferring glycosyl groups / transferase, transferring hexosyl groups | chr2:18420832-18422839 REVERSE
BnaC04g12860D	-3.52407	26.2	misc.UDP glucosyl and glucoronyl transferases	UDP-glucoronosyl/UDP-glucosyl transferase family protein | chr2:13518211-13520364 FORWARD
BnaC04g38250D	-1.05452	26.2	misc.UDP glucosyl and glucoronyl transferases	galactosyltransferase family protein | chr2:11115905-11118208 REVERSE
BnaC05g05050D	-2.51245	26.2	misc.UDP glucosyl and glucoronyl transferases	Symbols: UGT71C3 | UGT71C3 (UDP-GLUCOSYL TRANSFERASE 71C3); UDP-glycosyltransferase/ quercetin 3-O-glucosyltransferase/ transferase, transferring glycosyl groups | chr1:2227594-2229319 REVERSE
BnaC05g14360D	-1.56322	26.2	misc.UDP glucosyl and glucoronyl transferases	transferase/ transferase, transferring glycosyl groups | chr1:6433574-6436922 FORWARD
BnaC05g26770D	-2.72247	26.2	misc.UDP glucosyl and glucoronyl transferases	glycosyltransferase family 14 protein / core-2/I-branching enzyme family protein | chr4:1467727-1470080 REVERSE
BnaC05g48570D	-1.46123	26.2	misc.UDP glucosyl and glucoronyl transferases	Symbols: GAUT13 | GAUT13 (Galacturonosyltransferase 13); polygalacturonate 4-alpha-galacturonosyltransferase/ transferase, transferring glycosyl groups / transferase, transferring hexosyl groups | chr3:8957-12444 FORWARD
BnaC06g23080D	1.68706	26.2	misc.UDP glucosyl and glucoronyl transferases	Symbols: XXT5 | XXT5 (XYLOGLUCAN XYLOSYLTRANSFERASE 5); transferase/ transferase, transferring glycosyl groups / xyloglucan 6-xylosyltransferase | chr1:27959578-27961454 FORWARD
BnaC06g23090D	1.61133	26.2	misc.UDP glucosyl and glucoronyl transferases	Symbols: XXT5 | XXT5 (XYLOGLUCAN XYLOSYLTRANSFERASE 5); transferase/ transferase, transferring glycosyl groups / xyloglucan 6-xylosyltransferase | chr1:27959578-27961454 FORWARD
BnaC06g23330D	1.57679	26.2	misc.UDP glucosyl and glucoronyl transferases	Symbols: UGT89B1 | UGT89B1 (UDP-GLUCOSYL TRANSFERASE 89B1); UDP-glycosyltransferase/ quercetin 3-O-glucosyltransferase/ quercetin 4'-O-glucosyltransferase/ quercetin 7-O-glucosyltransferase/ transferase, transferring glycosyl groups / transferase, transferring hexosyl group | chr1:27784981-27786804 FORWARD
BnaC06g27250D	2.16993	26.2	misc.UDP glucosyl and glucoronyl transferases	Symbols: GAUT15 | GAUT15 (Galacturonosyltransferase 15); polygalacturonate 4-alpha-galacturonosyltransferase/ transferase, transferring glycosyl groups / transferase, transferring hexosyl groups | chr3:21742071-21746324 REVERSE
BnaC06g35290D	1.08311	26.2	misc.UDP glucosyl and glucoronyl transferases	Symbols: XXT5 | XXT5 (XYLOGLUCAN XYLOSYLTRANSFERASE 5); transferase/ transferase, transferring glycosyl groups / xyloglucan 6-xylosyltransferase | chr1:27959578-27961454 FORWARD
BnaC06g35300D	1.11904	26.2	misc.UDP glucosyl and glucoronyl transferases	Symbols: XXT5 | XXT5 (XYLOGLUCAN XYLOSYLTRANSFERASE 5); transferase/ transferase, transferring glycosyl groups / xyloglucan 6-xylosyltransferase | chr1:27959578-27961454 FORWARD
BnaC07g05280D	1.58829	26.2	misc.UDP glucosyl and glucoronyl transferases	Symbols: GAUT10, LGT4 | GAUT10 (GALACTURONOSYLTRANSFERASE 10); polygalacturonate 4-alpha-galacturonosyltransferase/ transferase, transferring glycosyl groups / transferase, transferring hexosyl groups | chr2:8957793-8959780 FORWARD
BnaC07g33030D	3.33092	26.2	misc.UDP glucosyl and glucoronyl transferases	Symbols: UGT84A1 | UGT84A1; UDP-glycosyltransferase/ sinapate 1-glucosyltransferase/ transferase, transferring glycosyl groups | chr4:8848801-8850516 REVERSE
BnaC07g33070D	-1.28843	26.2	misc.UDP glucosyl and glucoronyl transferases	Symbols: IAGLU | IAGLU (INDOLE-3-ACETATE BETA-D-GLUCOSYLTRANSFERASE); UDP-glycosyltransferase/ transferase, transferring glycosyl groups | chr4:8877590-8879327 REVERSE
BnaC08g05930D	-4.13254	26.2	misc.UDP glucosyl and glucoronyl transferases	Symbols: AtUGT85A2 | AtUGT85A2 (UDP-glucosyl transferase 85A2); UDP-glycosyltransferase/ glucuronosyltransferase/ transferase, transferring glycosyl groups | chr1:7894858-7897591 REVERSE
BnaC08g10220D	-1.20131	26.2	misc.UDP glucosyl and glucoronyl transferases	Symbols: IAGLU | IAGLU (INDOLE-3-ACETATE BETA-D-GLUCOSYLTRANSFERASE); UDP-glycosyltransferase/ transferase, transferring glycosyl groups | chr4:8877590-8879327 REVERSE
BnaC08g10230D	9.49852	26.2	misc.UDP glucosyl and glucoronyl transferases	Symbols: IAGLU | IAGLU (INDOLE-3-ACETATE BETA-D-GLUCOSYLTRANSFERASE); UDP-glycosyltransferase/ transferase, transferring glycosyl groups | chr4:8877590-8879327 REVERSE
BnaC08g29540D	1.5927	26.2	misc.UDP glucosyl and glucoronyl transferases	Symbols: GAUT15 | GAUT15 (Galacturonosyltransferase 15); polygalacturonate 4-alpha-galacturonosyltransferase/ transferase, transferring glycosyl groups / transferase, transferring hexosyl groups | chr3:21742071-21746324 REVERSE
BnaC08g32430D	2.38391	26.2	misc.UDP glucosyl and glucoronyl transferases	Symbols: ATXT1, XT1, XXT1 | XT1 (XYLOSYLTRANSFERASE 1); UDP-xylosyltransferase/ transferase/ transferase, transferring glycosyl groups / xyloglucan 6-xylosyltransferase | chr3:23201117-23202907 FORWARD
BnaC08g37140D	-2.36075	26.2	misc.UDP glucosyl and glucoronyl transferases	Symbols: GAUT11 | GAUT11 (Galacturonosyltransferase 11); polygalacturonate 4-alpha-galacturonosyltransferase | chr1:6395864-6398239 FORWARD
BnaC09g13090D	-1.77682	26.2	misc.UDP glucosyl and glucoronyl transferases	glycosyltransferase family 14 protein / core-2/I-branching enzyme family protein | chr4:1467727-1470080 REVERSE
BnaC09g34870D	-1.30895	26.2	misc.UDP glucosyl and glucoronyl transferases	Symbols: UGT76E2 | UGT76E2 (UDP-GLUCOSYL TRANSFERASE 76E2); UDP-glycosyltransferase/ quercetin 3-O-glucosyltransferase/ quercetin 7-O-glucosyltransferase | chr5:24008983-24010649 REVERSE
BnaC09g38020D	-1.36219	26.2	misc.UDP glucosyl and glucoronyl transferases	exostosin family protein | chr5:6646719-6649498 FORWARD
BnaC09g49570D	-6.1964	26.2	misc.UDP glucosyl and glucoronyl transferases	UDP-glucoronosyl/UDP-glucosyl transferase family protein | chr5:1769648-1771515 FORWARD
BnaC09g50610D	6.12928	26.2	misc.UDP glucosyl and glucoronyl transferases	glycosyltransferase family protein 47 | chr5:1283468-1286359 FORWARD
BnaCnng24560D	-1.22136	26.2	misc.UDP glucosyl and glucoronyl transferases	Symbols: GUT1 | GUT1; catalytic/ glucuronoxylan glucuronosyltransferase | chr5:24839178-24841940 REVERSE
BnaCnng37590D	-2.61365	26.2	misc.UDP glucosyl and glucoronyl transferases	UDP-glucoronosyl/UDP-glucosyl transferase family protein | chr3:17210855-17212348 REVERSE
BnaCnng47320D	-1.43347	26.2	misc.UDP glucosyl and glucoronyl transferases	Symbols: UGT73B1 | UGT73B1 (UDP-glucosyl transferase 73B1); UDP-glycosyltransferase/ abscisic acid glucosyltransferase/ quercetin 3-O-glucosyltransferase/ quercetin 7-O-glucosyltransferase | chr4:16348106-16349982 REVERSE
BnaCnng63730D	-9.16323	26.2	misc.UDP glucosyl and glucoronyl transferases	UDP-glucoronosyl/UDP-glucosyl transferase family protein | chr3:7676927-7678414 REVERSE
BnaA02g09020D	-3.24659	26.21	misc.protease inhibitor/seed storage/lipid transfer protein (LTP) family protein	protease inhibitor/seed storage/lipid transfer protein (LTP) family protein | chr5:22467430-22468263 FORWARD
BnaA02g20630D	-4.05889	26.21	misc.protease inhibitor/seed storage/lipid transfer protein (LTP) family protein	protease inhibitor/seed storage/lipid transfer protein (LTP) family protein | chr4:69273-69875 REVERSE
BnaA02g30210D	-3.00328	26.21	misc.protease inhibitor/seed storage/lipid transfer protein (LTP) family protein	protease inhibitor/seed storage/lipid transfer protein (LTP) family protein | chr5:19647835-19648281 REVERSE
BnaA03g21100D	-1.99515	26.21	misc.protease inhibitor/seed storage/lipid transfer protein (LTP) family protein	protease inhibitor/seed storage/lipid transfer protein (LTP) family protein | chr2:18626320-18626997 FORWARD
BnaA05g13220D	-2.48308	26.21	misc.protease inhibitor/seed storage/lipid transfer protein (LTP) family protein	protease inhibitor/seed storage/lipid transfer protein (LTP)-related | chr4:8502374-8503199 REVERSE
BnaA05g35420D	-1.4839	26.21	misc.protease inhibitor/seed storage/lipid transfer protein (LTP) family protein	protease inhibitor/seed storage/lipid transfer protein (LTP)-related | chr4:8502374-8503199 REVERSE
BnaA06g38220D	-2.98829	26.21	misc.protease inhibitor/seed storage/lipid transfer protein (LTP) family protein	Symbols: ELP | ELP (EXTENSIN-LIKE PROTEIN); lipid binding | chr1:4089847-4090725 REVERSE
BnaA08g00590D	-2.70645	26.21	misc.protease inhibitor/seed storage/lipid transfer protein (LTP) family protein	lipid binding | chr1:20614633-20616435 FORWARD
BnaC02g13020D	-3.37197	26.21	misc.protease inhibitor/seed storage/lipid transfer protein (LTP) family protein	protease inhibitor/seed storage/lipid transfer protein (LTP) family protein | chr5:22467430-22468263 FORWARD
BnaC02g13050D	-10.359	26.21	misc.protease inhibitor/seed storage/lipid transfer protein (LTP) family protein	protease inhibitor/seed storage/lipid transfer protein (LTP) family protein | chr5:22467430-22468263 FORWARD
BnaC03g25160D	-2.70595	26.21	misc.protease inhibitor/seed storage/lipid transfer protein (LTP) family protein	protease inhibitor/seed storage/lipid transfer protein (LTP) family protein | chr2:18626320-18626997 FORWARD
BnaC06g41560D	-2.81256	26.21	misc.protease inhibitor/seed storage/lipid transfer protein (LTP) family protein	lipid binding | chr1:20614633-20616435 FORWARD
BnaC09g08390D	-2.37794	26.21	misc.protease inhibitor/seed storage/lipid transfer protein (LTP) family protein	protease inhibitor/seed storage/lipid transfer protein (LTP) family protein | chr2:4310412-4312103 REVERSE
BnaC09g13410D	-8.40939	26.21	misc.protease inhibitor/seed storage/lipid transfer protein (LTP) family protein	protease inhibitor/seed storage/lipid transfer protein (LTP) family protein | chr1:23136369-23137191 REVERSE
BnaCnng37610D	-4.91126	26.21	misc.protease inhibitor/seed storage/lipid transfer protein (LTP) family protein	protease inhibitor/seed storage/lipid transfer protein (LTP) family protein | chr4:7417236-7417803 REVERSE
BnaCnng47750D	-5.51964	26.21	misc.protease inhibitor/seed storage/lipid transfer protein (LTP) family protein	protease inhibitor/seed storage/lipid transfer protein (LTP) family protein | chr4:69273-69875 REVERSE
BnaC02g42910D	1.40128	26.21	misc.protease inhibitor/seed storage/lipid transfer protein (LTP) family protein	protease inhibitor/seed storage/lipid transfer protein (LTP) family protein | chr5:25645263-25646735 REVERSE
BnaA02g34050D	1.54085	26.21	misc.protease inhibitor/seed storage/lipid transfer protein (LTP) family protein	protease inhibitor/seed storage/lipid transfer protein (LTP) family protein | chr5:25645263-25646735 REVERSE
BnaA04g04450D	2.07807	26.21	misc.protease inhibitor/seed storage/lipid transfer protein (LTP) family protein	protease inhibitor/seed storage/lipid transfer protein (LTP) family protein | chr3:19987579-19988269 REVERSE
BnaA03g54590D	2.16624	26.21	misc.protease inhibitor/seed storage/lipid transfer protein (LTP) family protein	protease inhibitor/seed storage/lipid transfer protein (LTP) family protein | chr1:23136369-23137191 REVERSE
BnaAnng11140D	2.45729	26.21	misc.protease inhibitor/seed storage/lipid transfer protein (LTP) family protein	protease inhibitor/seed storage/lipid transfer protein (LTP) family protein | chr3:6267049-6267643 FORWARD
BnaC03g29580D	2.50416	26.21	misc.protease inhibitor/seed storage/lipid transfer protein (LTP) family protein	protease inhibitor/seed storage/lipid transfer protein (LTP) family protein | chr4:7409621-7410406 REVERSE
BnaC03g50130D	2.51967	26.21	misc.protease inhibitor/seed storage/lipid transfer protein (LTP) family protein	protease inhibitor/seed storage/lipid transfer protein (LTP) family protein | chr5:25645263-25646735 REVERSE
BnaA03g25130D	2.92914	26.21	misc.protease inhibitor/seed storage/lipid transfer protein (LTP) family protein	protease inhibitor/seed storage/lipid transfer protein (LTP) family protein | chr4:7409621-7410406 REVERSE
BnaA06g23230D	3.80456	26.21	misc.protease inhibitor/seed storage/lipid transfer protein (LTP) family protein	protease inhibitor/seed storage/lipid transfer protein (LTP) family protein | chr5:25645263-25646735 REVERSE
BnaC02g00930D	4.29014	26.21	misc.protease inhibitor/seed storage/lipid transfer protein (LTP) family protein	protease inhibitor/seed storage/lipid transfer protein (LTP) family protein | chr5:25645263-25646735 REVERSE
BnaAnng05900D	5.32889	26.21	misc.protease inhibitor/seed storage/lipid transfer protein (LTP) family protein	protease inhibitor/seed storage/lipid transfer protein (LTP) family protein | chr5:2909363-2910545 REVERSE
BnaA01g12830D	2.98489	26.21	misc.protease inhibitor/seed storage/lipid transfer protein (LTP) family protein	lipid binding | chr1:27647756-27648536 REVERSE
BnaA02g09030D	-3.07039	26.21	misc.protease inhibitor/seed storage/lipid transfer protein (LTP) family protein	protease inhibitor/seed storage/lipid transfer protein (LTP) family protein | chr5:22467430-22468263 FORWARD
BnaA02g16470D	8.55714	26.21	misc.protease inhibitor/seed storage/lipid transfer protein (LTP) family protein	lipid binding | chr1:27647756-27648536 REVERSE
BnaA03g25150D	-8.81378	26.21	misc.protease inhibitor/seed storage/lipid transfer protein (LTP) family protein	protease inhibitor/seed storage/lipid transfer protein (LTP) family protein | chr4:7417236-7417803 REVERSE
BnaA05g06750D	6.07414	26.21	misc.protease inhibitor/seed storage/lipid transfer protein (LTP) family protein	protease inhibitor/seed storage/lipid transfer protein (LTP) family protein | chr2:15859239-15859907 FORWARD
BnaA05g21830D	-2.03695	26.21	misc.protease inhibitor/seed storage/lipid transfer protein (LTP) family protein	protease inhibitor/seed storage/lipid transfer protein (LTP) family protein | chr3:6267049-6267643 FORWARD
BnaA06g00440D	-1.64173	26.21	misc.protease inhibitor/seed storage/lipid transfer protein (LTP) family protein	lipid binding | chr1:20614633-20616435 FORWARD
BnaA08g24920D	-2.56596	26.21	misc.protease inhibitor/seed storage/lipid transfer protein (LTP) family protein	Symbols: ELP | ELP (EXTENSIN-LIKE PROTEIN); lipid binding | chr1:4089847-4090725 REVERSE
BnaA09g08190D	-1.52531	26.21	misc.protease inhibitor/seed storage/lipid transfer protein (LTP) family protein	protease inhibitor/seed storage/lipid transfer protein (LTP) family protein | chr2:4310412-4312103 REVERSE
BnaA09g12710D	-1.01994	26.21	misc.protease inhibitor/seed storage/lipid transfer protein (LTP) family protein	protease inhibitor/seed storage/lipid transfer protein (LTP) family protein | chr1:23252313-23253743 FORWARD
BnaA10g09640D	1.92588	26.21	misc.protease inhibitor/seed storage/lipid transfer protein (LTP) family protein	protease inhibitor/seed storage/lipid transfer protein (LTP) family protein | chr5:22460550-22461250 FORWARD
BnaC01g34380D	-2.59965	26.21	misc.protease inhibitor/seed storage/lipid transfer protein (LTP) family protein	protease inhibitor/seed storage/lipid transfer protein (LTP) family protein | chr3:6267049-6267643 FORWARD
BnaC04g45500D	2.02783	26.21	misc.protease inhibitor/seed storage/lipid transfer protein (LTP) family protein	protease inhibitor/seed storage/lipid transfer protein (LTP) family protein | chr2:15859239-15859907 FORWARD
BnaC05g35010D	-1.63907	26.21	misc.protease inhibitor/seed storage/lipid transfer protein (LTP) family protein	protease inhibitor/seed storage/lipid transfer protein (LTP) family protein | chr3:6267049-6267643 FORWARD
BnaC05g49400D	-3.28672	26.21	misc.protease inhibitor/seed storage/lipid transfer protein (LTP) family protein	Symbols: ELP | ELP (EXTENSIN-LIKE PROTEIN); lipid binding | chr1:4089847-4090725 REVERSE
BnaC09g23220D	1.11382	26.21	misc.protease inhibitor/seed storage/lipid transfer protein (LTP) family protein	protease inhibitor/seed storage/lipid transfer protein (LTP) family protein | chr4:7409621-7410406 REVERSE
BnaA03g41450D	-4.45943	26.22	misc.short chain dehydrogenase/reductase (SDR)	short-chain dehydrogenase/reductase (SDR) family protein | chr3:19173622-19174667 REVERSE
BnaA04g03710D	-1.59465	26.22	misc.short chain dehydrogenase/reductase (SDR)	short-chain dehydrogenase/reductase (SDR) family protein | chr3:20502612-20503797 FORWARD
BnaA05g37330D	-3.68557	26.22	misc.short chain dehydrogenase/reductase (SDR)	short-chain dehydrogenase/reductase (SDR) family protein | chr3:1035500-1036672 FORWARD
BnaA06g24130D	-2.31177	26.22	misc.short chain dehydrogenase/reductase (SDR)	short-chain dehydrogenase/reductase (SDR) family protein | chr5:26050810-26052034 REVERSE
BnaA07g36830D	-2.62553	26.22	misc.short chain dehydrogenase/reductase (SDR)	Symbols: KCR2 | short-chain dehydrogenase/reductase (SDR) family protein | chr1:8674056-8676408 FORWARD
BnaA08g01340D	-1.10049	26.22	misc.short chain dehydrogenase/reductase (SDR)	short-chain dehydrogenase/reductase (SDR) family protein | chr3:327615-329031 REVERSE
BnaA09g21670D	-1.83843	26.22	misc.short chain dehydrogenase/reductase (SDR)	short-chain dehydrogenase/reductase (SDR) family protein | chr4:6944918-6947333 REVERSE
BnaA09g34910D	-3.48484	26.22	misc.short chain dehydrogenase/reductase (SDR)	short-chain dehydrogenase/reductase (SDR) family protein | chr3:20502612-20503797 FORWARD
BnaA10g00200D	-2.59877	26.22	misc.short chain dehydrogenase/reductase (SDR)	short-chain dehydrogenase/reductase (SDR) family protein | chr1:293342-295040 FORWARD
BnaA10g26110D	-2.65245	26.22	misc.short chain dehydrogenase/reductase (SDR)	short-chain dehydrogenase/reductase (SDR) family protein | chr5:1102090-1104446 FORWARD
BnaC03g01820D	-1.46114	26.22	misc.short chain dehydrogenase/reductase (SDR)	short-chain dehydrogenase/reductase (SDR) family protein | chr5:1434774-1437330 FORWARD
BnaC03g49110D	-2.5215	26.22	misc.short chain dehydrogenase/reductase (SDR)	short-chain dehydrogenase/reductase (SDR) family protein | chr5:26050810-26052034 REVERSE
BnaC05g47840D	-1.72363	26.22	misc.short chain dehydrogenase/reductase (SDR)	short-chain dehydrogenase/reductase (SDR) family protein | chr3:783332-786209 REVERSE
BnaC07g11110D	-2.00595	26.22	misc.short chain dehydrogenase/reductase (SDR)	Symbols: KCR2 | short-chain dehydrogenase/reductase (SDR) family protein | chr1:8674056-8676408 FORWARD
BnaC07g11120D	-2.72609	26.22	misc.short chain dehydrogenase/reductase (SDR)	Symbols: KCR2 | short-chain dehydrogenase/reductase (SDR) family protein | chr1:8674056-8676408 FORWARD
BnaC08g26120D	-1.55209	26.22	misc.short chain dehydrogenase/reductase (SDR)	short-chain dehydrogenase/reductase (SDR) family protein | chr3:20502612-20503797 FORWARD
BnaC08g33660D	-1.05956	26.22	misc.short chain dehydrogenase/reductase (SDR)	short-chain dehydrogenase/reductase (SDR) family protein | chr2:19347359-19348238 REVERSE
BnaC09g23920D	-1.93589	26.22	misc.short chain dehydrogenase/reductase (SDR)	short-chain dehydrogenase/reductase (SDR) family protein | chr4:6944918-6947333 REVERSE
BnaA09g22880D	1.03868	26.22	misc.short chain dehydrogenase/reductase (SDR)	short-chain dehydrogenase/reductase (SDR) family protein | chr4:6146690-6148814 FORWARD
BnaC08g31160D	1.88616	26.22	misc.short chain dehydrogenase/reductase (SDR)	short-chain dehydrogenase/reductase (SDR) family protein | chr3:22662960-22664493 FORWARD
BnaA04g21510D	2.01129	26.22	misc.short chain dehydrogenase/reductase (SDR)	short-chain dehydrogenase/reductase (SDR) family protein | chr2:15751568-15753967 REVERSE
BnaC09g25870D	2.06281	26.22	misc.short chain dehydrogenase/reductase (SDR)	short-chain dehydrogenase/reductase (SDR) family protein | chr4:6146690-6148814 FORWARD
BnaC09g06430D	2.10046	26.22	misc.short chain dehydrogenase/reductase (SDR)	short-chain dehydrogenase/reductase (SDR) family protein | chr2:15751568-15753967 REVERSE
BnaC02g36330D	2.27446	26.22	misc.short chain dehydrogenase/reductase (SDR)	short-chain dehydrogenase/reductase (SDR) family protein | chr3:9845396-9847148 FORWARD
BnaA02g28260D	4.23585	26.22	misc.short chain dehydrogenase/reductase (SDR)	short-chain dehydrogenase/reductase (SDR) family protein | chr3:9845396-9847148 FORWARD
BnaA03g01520D	1.10241	26.22	misc.short chain dehydrogenase/reductase (SDR)	short-chain dehydrogenase/reductase (SDR) family protein | chr5:1434774-1437330 FORWARD
BnaA03g02760D	-1.3722	26.22	misc.short chain dehydrogenase/reductase (SDR)	short-chain dehydrogenase/reductase (SDR) family protein | chr5:3144200-3145730 FORWARD
BnaA03g21640D	-3.24793	26.22	misc.short chain dehydrogenase/reductase (SDR)	short-chain dehydrogenase/reductase (SDR) family protein | chr2:19349536-19350539 REVERSE
BnaA03g46440D	-6.45121	26.22	misc.short chain dehydrogenase/reductase (SDR)	short-chain dehydrogenase/reductase (SDR) family protein | chr4:12497055-12500128 FORWARD
BnaA05g00750D	-1.34875	26.22	misc.short chain dehydrogenase/reductase (SDR)	short-chain dehydrogenase/reductase (SDR) family protein | chr2:19350740-19352088 REVERSE
BnaA05g07000D	-1.26069	26.22	misc.short chain dehydrogenase/reductase (SDR)	short-chain dehydrogenase/reductase (SDR) family protein | chr2:15751568-15753967 REVERSE
BnaA09g01350D	-3.27302	26.22	misc.short chain dehydrogenase/reductase (SDR)	binding / catalytic/ oxidoreductase | chr4:1392121-1393842 FORWARD
BnaA09g28160D	-1.42084	26.22	misc.short chain dehydrogenase/reductase (SDR)	Symbols: KCR2 | short-chain dehydrogenase/reductase (SDR) family protein | chr1:8674056-8676408 FORWARD
BnaA10g16630D	-1.37346	26.22	misc.short chain dehydrogenase/reductase (SDR)	short-chain dehydrogenase/reductase (SDR) family protein | chr5:6017865-6019993 FORWARD
BnaA10g27030D	2.14872	26.22	misc.short chain dehydrogenase/reductase (SDR)	short-chain dehydrogenase/reductase (SDR) family protein | chr5:568524-570920 FORWARD
BnaC01g40290D	-1.07778	26.22	misc.short chain dehydrogenase/reductase (SDR)	short-chain dehydrogenase/reductase (SDR) family protein | chr3:1031742-1033207 FORWARD
BnaC01g40320D	-2.49038	26.22	misc.short chain dehydrogenase/reductase (SDR)	short-chain dehydrogenase/reductase (SDR) family protein | chr3:1031742-1033207 FORWARD
BnaC03g04080D	8.835	26.22	misc.short chain dehydrogenase/reductase (SDR)	short-chain dehydrogenase/reductase (SDR) family protein | chr5:3144200-3145730 FORWARD
BnaC03g72480D	-2.03059	26.22	misc.short chain dehydrogenase/reductase (SDR)	short-chain dehydrogenase/reductase (SDR) family protein | chr2:19349536-19350539 REVERSE
BnaC04g00390D	-1.47657	26.22	misc.short chain dehydrogenase/reductase (SDR)	short-chain dehydrogenase/reductase (SDR) family protein | chr2:19350740-19352088 REVERSE
BnaC05g00270D	-1.69497	26.22	misc.short chain dehydrogenase/reductase (SDR)	short-chain dehydrogenase/reductase (SDR) family protein | chr1:293342-295040 FORWARD
BnaC05g47560D	-2.13993	26.22	misc.short chain dehydrogenase/reductase (SDR)	short-chain dehydrogenase/reductase (SDR) family protein | chr3:1035500-1036672 FORWARD
BnaC06g37360D	1.7419	26.22	misc.short chain dehydrogenase/reductase (SDR)	short-chain dehydrogenase/reductase (SDR) family protein | chr2:15751568-15753967 REVERSE
BnaC07g38700D	-4.50413	26.22	misc.short chain dehydrogenase/reductase (SDR)	short-chain dehydrogenase/reductase (SDR) family protein | chr4:12497055-12500128 FORWARD
BnaC09g54150D	-4.36923	26.22	misc.short chain dehydrogenase/reductase (SDR)	short-chain dehydrogenase/reductase (SDR) family protein | chr5:6017865-6019993 FORWARD
BnaCnng03410D	-1.29068	26.22	misc.short chain dehydrogenase/reductase (SDR)	short-chain dehydrogenase/reductase (SDR) family protein | chr5:568524-570920 FORWARD
BnaA03g57830D	-1.09311	26.23	misc.rhodanese	rhodanese-like domain-containing protein | chr3:9235196-9236607 REVERSE
BnaA04g23490D	-2.20778	26.23	misc.rhodanese	rhodanese-like domain-containing protein | chr2:17010048-17012067 FORWARD
BnaA05g37090D	-2.26529	26.23	misc.rhodanese	rhodanese-like domain-containing protein | chr3:2712236-2713269 FORWARD
BnaAnng13830D	-1.91401	26.23	misc.rhodanese	rhodanese-like domain-containing protein | chr4:13826374-13827823 REVERSE
BnaC01g20350D	-1.55924	26.23	misc.rhodanese	rhodanese-like domain-containing protein | chr4:13826374-13827823 REVERSE
BnaC03g44540D	-1.1038	26.23	misc.rhodanese	rhodanese-like domain-containing protein | chr3:9235196-9236607 REVERSE
BnaC04g47360D	-1.70796	26.23	misc.rhodanese	rhodanese-like domain-containing protein | chr2:17010048-17012067 FORWARD
BnaC02g48490D	-8.00375	26.23	misc.rhodanese	rhodanese-like domain-containing protein | chr4:13826374-13827823 REVERSE
BnaC05g43640D	-2.64861	26.23	misc.rhodanese	rhodanese-like domain-containing protein | chr3:2712236-2713269 FORWARD
BnaCnng41830D	-3.41093	26.23	misc.rhodanese	rhodanese-like domain-containing protein | chr4:13826374-13827823 REVERSE
BnaA01g10340D	-1.59023	26.24	misc.GCN5-related N-acetyltransferase	GCN5-related N-acetyltransferase (GNAT) family protein | chr4:10830237-10832094 REVERSE
BnaA03g06200D	-1.39056	26.24	misc.GCN5-related N-acetyltransferase	GCN5-related N-acetyltransferase (GNAT) family protein | chr5:5524314-5526589 REVERSE
BnaA03g13880D	-1.46022	26.24	misc.GCN5-related N-acetyltransferase	GCN5L1 family protein | chr2:12928767-12929737 REVERSE
BnaA03g48960D	-2.10702	26.24	misc.GCN5-related N-acetyltransferase	GCN5-related N-acetyltransferase (GNAT) family protein | chr4:13937676-13939144 REVERSE
BnaA03g54190D	-2.74582	26.24	misc.GCN5-related N-acetyltransferase	GCN5-related N-acetyltransferase (GNAT) family protein / amino acid kinase family protein | chr4:17696059-17698843 REVERSE
BnaA04g22300D	-2.20707	26.24	misc.GCN5-related N-acetyltransferase	GCN5-related N-acetyltransferase (GNAT) family protein | chr2:16286339-16287970 REVERSE
BnaA04g28860D	-2.03938	26.24	misc.GCN5-related N-acetyltransferase	GCN5-related N-acetyltransferase (GNAT) family protein | chr2:13632468-13633335 REVERSE
BnaA05g06530D	-2.09507	26.24	misc.GCN5-related N-acetyltransferase	Symbols: ATMAK3 | ATMAK3; N-acetyltransferase | chr2:15978512-15980749 REVERSE
BnaA08g22670D	-1.51069	26.24	misc.GCN5-related N-acetyltransferase	GCN5-related N-acetyltransferase (GNAT) family protein | chr1:6309041-6311326 REVERSE
BnaA09g29830D	-2.00747	26.24	misc.GCN5-related N-acetyltransferase	GCN5-related N-acetyltransferase (GNAT) family protein | chr1:8503777-8506795 REVERSE
BnaA10g17680D	-1.64442	26.24	misc.GCN5-related N-acetyltransferase	GCN5-related N-acetyltransferase (GNAT) family protein | chr5:5524314-5526589 REVERSE
BnaA10g18510D	-1.1836	26.24	misc.GCN5-related N-acetyltransferase	Symbols: AtGNA1 | AtGNA1 (Arabidopsis thaliana glucose-6-phosphate acetyltransferase 1); N-acetyltransferase/ glucosamine 6-phosphate N-acetyltransferase | chr5:5144093-5144542 REVERSE
BnaC03g07970D	-1.21836	26.24	misc.GCN5-related N-acetyltransferase	GCN5-related N-acetyltransferase (GNAT) family protein | chr5:5524314-5526589 REVERSE
BnaC03g44940D	-1.54785	26.24	misc.GCN5-related N-acetyltransferase	GCN5-related N-acetyltransferase (GNAT) family protein | chr2:1702221-1704003 REVERSE
BnaC04g07200D	-1.59971	26.24	misc.GCN5-related N-acetyltransferase	Symbols: ATMAK3 | ATMAK3; N-acetyltransferase | chr2:15978512-15980749 REVERSE
BnaC04g42730D	-3.64016	26.24	misc.GCN5-related N-acetyltransferase	GCN5-related N-acetyltransferase (GNAT) family protein | chr2:13632468-13633335 REVERSE
BnaC04g46060D	-2.28146	26.24	misc.GCN5-related N-acetyltransferase	GCN5-related N-acetyltransferase (GNAT) family protein | chr2:16286339-16287970 REVERSE
BnaC05g29050D	-1.44324	26.24	misc.GCN5-related N-acetyltransferase	Symbols: ATNSI | ATNSI (NUCLEAR SHUTTLE INTERACTING); N-acetyltransferase | chr1:11534684-11536338 REVERSE
BnaC05g50810D	-2.09934	26.24	misc.GCN5-related N-acetyltransferase	GCN5-related N-acetyltransferase (GNAT) family protein | chr1:8503777-8506795 REVERSE
BnaC06g05060D	-1.79384	26.24	misc.GCN5-related N-acetyltransferase	GCN5-related N-acetyltransferase (GNAT) family protein | chr4:13937676-13939144 REVERSE
BnaC07g04350D	-1.7821	26.24	misc.GCN5-related N-acetyltransferase	GCN5-related N-acetyltransferase (GNAT) family protein | chr2:2348136-2352157 FORWARD
BnaC07g41170D	-1.79384	26.24	misc.GCN5-related N-acetyltransferase	GCN5-related N-acetyltransferase (GNAT) family protein | chr4:13937676-13939144 REVERSE
BnaC07g46690D	-1.74941	26.24	misc.GCN5-related N-acetyltransferase	GCN5-related N-acetyltransferase (GNAT) family protein / amino acid kinase family protein | chr4:17696059-17698843 REVERSE
BnaC08g17900D	-2.25824	26.24	misc.GCN5-related N-acetyltransferase	GCN5-related N-acetyltransferase (GNAT) family protein | chr1:6309041-6311326 REVERSE
BnaCnng04490D	-1.44576	26.24	misc.GCN5-related N-acetyltransferase	GCN5-related N-acetyltransferase (GNAT) family protein | chr1:9071140-9071861 FORWARD
BnaCnng07680D	-1.65384	26.24	misc.GCN5-related N-acetyltransferase	GCN5-related N-acetyltransferase (GNAT) family protein | chr1:27110865-27111932 FORWARD
BnaCnng53710D	-1.20625	26.24	misc.GCN5-related N-acetyltransferase	GCN5-related N-acetyltransferase (GNAT) family protein | chr4:10830237-10832094 REVERSE
BnaC04g12680D	12.0532	26.24	misc.GCN5-related N-acetyltransferase	GCN5-related N-acetyltransferase (GNAT) family protein | chr2:13631062-13631768 REVERSE
BnaA03g18310D	-1.17253	26.24	misc.GCN5-related N-acetyltransferase	GCN5-related N-acetyltransferase (GNAT) family protein | chr2:16295315-16296328 FORWARD
BnaA03g37880D	-1.06432	26.24	misc.GCN5-related N-acetyltransferase	GCN5-related N-acetyltransferase (GNAT) family protein | chr2:1702221-1704003 REVERSE
BnaA05g02200D	2.1964	26.24	misc.GCN5-related N-acetyltransferase	N-acetyltransferase | chr2:17278158-17281830 FORWARD
BnaA05g10930D	1.9055	26.24	misc.GCN5-related N-acetyltransferase	GCN5-related N-acetyltransferase (GNAT) family protein | chr2:13631062-13631768 REVERSE
BnaA05g10960D	1.7625	26.24	misc.GCN5-related N-acetyltransferase	GCN5-related N-acetyltransferase (GNAT) family protein | chr2:13631062-13631768 REVERSE
BnaA05g16470D	-1.99987	26.24	misc.GCN5-related N-acetyltransferase	Symbols: ATNSI | ATNSI (NUCLEAR SHUTTLE INTERACTING); N-acetyltransferase | chr1:11534684-11536338 REVERSE
BnaA07g04340D	-1.46926	26.24	misc.GCN5-related N-acetyltransferase	GCN5-related N-acetyltransferase (GNAT) family protein | chr2:2348136-2352157 FORWARD
BnaA10g21140D	-1.89697	26.24	misc.GCN5-related N-acetyltransferase	GCN5-related N-acetyltransferase (GNAT) family protein | chr5:3619155-3621301 FORWARD
BnaC01g01340D	-1.1515	26.24	misc.GCN5-related N-acetyltransferase	GCN5-related N-acetyltransferase (GNAT) family protein / amino acid kinase family protein | chr4:17696059-17698843 REVERSE
BnaC02g03770D	-1.62761	26.24	misc.GCN5-related N-acetyltransferase	GCN5-related N-acetyltransferase (GNAT) family protein | chr5:3619155-3621301 FORWARD
BnaC03g21820D	-2.45396	26.24	misc.GCN5-related N-acetyltransferase	GCN5-related N-acetyltransferase (GNAT) family protein | chr2:16295315-16296328 FORWARD
BnaC04g01890D	-1.08806	26.24	misc.GCN5-related N-acetyltransferase	N-acetyltransferase | chr2:17278158-17281830 FORWARD
BnaC04g14700D	-7.40939	26.24	misc.GCN5-related N-acetyltransferase	GCN5-related N-acetyltransferase (GNAT) family protein | chr2:12843583-12845597 REVERSE
BnaA06g12720D	-2.66737	26.25	misc.sulfotransferase	Symbols: SOT17, ATSOT17, ATST5C | SOT17 (SULFOTRANSFERASE 17); desulfoglucosinolate sulfotransferase/ sulfotransferase | chr1:6398580-6399942 FORWARD
BnaA07g31230D	-4.05435	26.25	misc.sulfotransferase	Symbols: SOT18, ATSOT18, ATST5B | SOT18 (DESULFO-GLUCOSINOLATE SULFOTRANSFERASE 18); 3-methylthiopropyl-desulfoglucosinolate sulfotransferase/ 4-methylthiobutyl-desulfoglucosinolate sulfotransferase/ 5-methylthiopentyl-desulfoglucosinolate sulfotransferase/ 7-methylthioheptyl-desulfogluco | chr1:27862909-27864193 FORWARD
BnaA07g31260D	-2.08239	26.25	misc.sulfotransferase	Symbols: SOT16, ATSOT16, CORI-7, ATST5A | SOT16 (SULFOTRANSFERASE 16); desulfoglucosinolate sulfotransferase/ sulfotransferase | chr1:27864345-27865694 REVERSE
BnaAnng27200D	-1.12169	26.25	misc.sulfotransferase	Symbols: SOT16, ATSOT16, CORI-7, ATST5A | SOT16 (SULFOTRANSFERASE 16); desulfoglucosinolate sulfotransferase/ sulfotransferase | chr1:27864345-27865694 REVERSE
BnaC02g22640D	-1.49559	26.25	misc.sulfotransferase	Symbols: SOT16, ATSOT16, CORI-7, ATST5A | SOT16 (SULFOTRANSFERASE 16); desulfoglucosinolate sulfotransferase/ sulfotransferase | chr1:27864345-27865694 REVERSE
BnaC06g34930D	-3.29851	26.25	misc.sulfotransferase	Symbols: SOT18, ATSOT18, ATST5B | SOT18 (DESULFO-GLUCOSINOLATE SULFOTRANSFERASE 18); 3-methylthiopropyl-desulfoglucosinolate sulfotransferase/ 4-methylthiobutyl-desulfoglucosinolate sulfotransferase/ 5-methylthiopentyl-desulfoglucosinolate sulfotransferase/ 7-methylthioheptyl-desulfogluco | chr1:27862909-27864193 FORWARD
BnaC06g35000D	-2.16711	26.25	misc.sulfotransferase	Symbols: SOT16, ATSOT16, CORI-7, ATST5A | SOT16 (SULFOTRANSFERASE 16); desulfoglucosinolate sulfotransferase/ sulfotransferase | chr1:27864345-27865694 REVERSE
BnaA09g14900D	3.50981	26.25	misc.sulfotransferase	Symbols: SOT18, ATSOT18, ATST5B | SOT18 (DESULFO-GLUCOSINOLATE SULFOTRANSFERASE 18); 3-methylthiopropyl-desulfoglucosinolate sulfotransferase/ 4-methylthiobutyl-desulfoglucosinolate sulfotransferase/ 5-methylthiopentyl-desulfoglucosinolate sulfotransferase/ 7-methylthioheptyl-desulfogluco | chr1:27862909-27864193 FORWARD
BnaA07g31250D	-8.56986	26.25	misc.sulfotransferase	Symbols: SOT18, ATSOT18, ATST5B | SOT18 (DESULFO-GLUCOSINOLATE SULFOTRANSFERASE 18); 3-methylthiopropyl-desulfoglucosinolate sulfotransferase/ 4-methylthiobutyl-desulfoglucosinolate sulfotransferase/ 5-methylthiopentyl-desulfoglucosinolate sulfotransferase/ 7-methylthioheptyl-desulfogluco | chr1:27862909-27864193 FORWARD
BnaC05g14270D	1.37756	26.25	misc.sulfotransferase	Symbols: SOT17, ATSOT17, ATST5C | SOT17 (SULFOTRANSFERASE 17); desulfoglucosinolate sulfotransferase/ sulfotransferase | chr1:6398580-6399942 FORWARD
BnaC06g34970D	-1.10566	26.25	misc.sulfotransferase	Symbols: SOT18, ATSOT18, ATST5B | SOT18 (DESULFO-GLUCOSINOLATE SULFOTRANSFERASE 18); 3-methylthiopropyl-desulfoglucosinolate sulfotransferase/ 4-methylthiobutyl-desulfoglucosinolate sulfotransferase/ 5-methylthiopentyl-desulfoglucosinolate sulfotransferase/ 7-methylthioheptyl-desulfogluco | chr1:27862909-27864193 FORWARD
BnaC09g15460D	-4.07729	26.25	misc.sulfotransferase	Symbols: SOT18, ATSOT18, ATST5B | SOT18 (DESULFO-GLUCOSINOLATE SULFOTRANSFERASE 18); 3-methylthiopropyl-desulfoglucosinolate sulfotransferase/ 4-methylthiobutyl-desulfoglucosinolate sulfotransferase/ 5-methylthiopentyl-desulfoglucosinolate sulfotransferase/ 7-methylthioheptyl-desulfogluco | chr1:27862909-27864193 FORWARD
BnaA08g01030D	-1.65639	26.27	misc.calcineurin-like phosphoesterase family protein	hydrolase/ protein serine/threonine phosphatase | chr1:20053161-20056396 REVERSE
BnaC03g69880D	-1.77456	26.27	misc.calcineurin-like phosphoesterase family protein	hydrolase/ protein serine/threonine phosphatase | chr1:20053161-20056396 REVERSE
BnaC04g00570D	-2.65313	26.27	misc.calcineurin-like phosphoesterase family protein	Symbols: ATPAP14, PAP14 | PAP14 (PURPLE ACID PHOSPHATASE 14); acid phosphatase/ protein serine/threonine phosphatase | chr2:19264573-19266446 REVERSE
BnaC05g14160D	-2.47508	26.27	misc.calcineurin-like phosphoesterase family protein	calcineurin-like phosphoesterase family protein | chr1:6361629-6363007 FORWARD
BnaC07g37770D	-1.79284	26.27	misc.calcineurin-like phosphoesterase family protein	hydrolase/ protein serine/threonine phosphatase | chr4:12054455-12060028 FORWARD
BnaA10g04470D	1.32061	26.27	misc.calcineurin-like phosphoesterase family protein	calcineurin-like phosphoesterase family protein | chr1:2152880-2155238 FORWARD
BnaA05g32550D	1.55587	26.27	misc.calcineurin-like phosphoesterase family protein	calcineurin-like phosphoesterase family protein | chr3:775368-778396 REVERSE
BnaC05g47900D	-1.62194	26.27	misc.calcineurin-like phosphoesterase family protein	calcineurin-like phosphoesterase family protein | chr3:775368-778396 REVERSE
BnaCnng62340D	-1.00446	26.27	misc.calcineurin-like phosphoesterase family protein	Symbols: MAG1 | MAG1 (MAIGO 1); hydrolase/ protein serine/threonine phosphatase | chr3:17637129-17639606 REVERSE
BnaA01g08120D	-2.014	26.28	misc.GDSL-motif lipase	GDSL-motif lipase/hydrolase family protein | chr4:14215545-14217579 FORWARD
BnaA01g15910D	-6.66402	26.28	misc.GDSL-motif lipase	GDSL-motif lipase/hydrolase family protein | chr4:13487457-13489371 FORWARD
BnaA02g04090D	-2.72677	26.28	misc.GDSL-motif lipase	GDSL-motif lipase/hydrolase family protein | chr5:6110255-6112029 REVERSE
BnaA02g24180D	-3.96108	26.28	misc.GDSL-motif lipase	GDSL-motif lipase/hydrolase family protein | chr5:18637023-18640361 REVERSE
BnaA03g43830D	-1.42999	26.28	misc.GDSL-motif lipase	GDSL-motif lipase/hydrolase family protein | chr4:10389111-10390917 REVERSE
BnaA05g20720D	-2.77003	26.28	misc.GDSL-motif lipase	GDSL-motif lipase/hydrolase family protein | chr1:12267866-12269913 FORWARD
BnaA05g25220D	-2.23704	26.28	misc.GDSL-motif lipase	Symbols: GLIP4 | GLIP4; carboxylesterase/ lipase | chr3:4734616-4735993 REVERSE
BnaA05g33110D	-2.16577	26.28	misc.GDSL-motif lipase	Symbols: ATLTL1, LTL1 | LTL1 (LI-TOLERANT LIPASE 1); carboxylesterase/ hydrolase, acting on ester bonds | chr3:1133320-1136316 REVERSE
BnaA06g22400D	-1.48003	26.28	misc.GDSL-motif lipase	GDSL-motif lipase/hydrolase family protein | chr5:25254888-25256617 FORWARD
BnaA06g32900D	-2.37116	26.28	misc.GDSL-motif lipase	GDSL-motif lipase/hydrolase family protein | chr3:9671517-9675927 FORWARD
BnaA07g07790D	-4.62746	26.28	misc.GDSL-motif lipase	GDSL-motif lipase/hydrolase family protein | chr1:10371839-10373766 FORWARD
BnaA07g08260D	-2.11548	26.28	misc.GDSL-motif lipase	GDSL-motif lipase, putative | chr1:10044337-10046442 REVERSE
BnaA07g08280D	-1.78008	26.28	misc.GDSL-motif lipase	GDSL-motif lipase, putative | chr1:10044337-10046442 REVERSE
BnaA09g15250D	-1.35271	26.28	misc.GDSL-motif lipase	GDSL-motif lipase/hydrolase family protein | chr1:21241673-21244047 FORWARD
BnaA09g16180D	-4.61497	26.28	misc.GDSL-motif lipase	GDSL-motif lipase/hydrolase family protein | chr5:915465-918485 FORWARD
BnaA09g27150D	-1.43913	26.28	misc.GDSL-motif lipase	lipase, putative | chr2:11706198-11708065 FORWARD
BnaAnng40320D	-3.50109	26.28	misc.GDSL-motif lipase	GDSL-motif lipase/hydrolase family protein | chr1:10375763-10377871 FORWARD
BnaC01g09700D	-1.77405	26.28	misc.GDSL-motif lipase	GDSL-motif lipase/hydrolase family protein | chr4:14215545-14217579 FORWARD
BnaC01g19020D	-4.9417	26.28	misc.GDSL-motif lipase	GDSL-motif lipase/hydrolase family protein | chr4:13487457-13489371 FORWARD
BnaC02g32010D	-2.57506	26.28	misc.GDSL-motif lipase	GDSL-motif lipase/hydrolase family protein | chr5:18637023-18640361 REVERSE
BnaC03g01340D	-2.33092	26.28	misc.GDSL-motif lipase	GDSL-motif lipase/hydrolase family protein | chr5:915465-918485 FORWARD
BnaC03g33650D	-4.21544	26.28	misc.GDSL-motif lipase	Symbols: ATLTL1, LTL1 | LTL1 (LI-TOLERANT LIPASE 1); carboxylesterase/ hydrolase, acting on ester bonds | chr3:1133320-1136316 REVERSE
BnaC03g51320D	-1.32193	26.28	misc.GDSL-motif lipase	GDSL-motif lipase/hydrolase family protein | chr5:25254888-25256617 FORWARD
BnaC04g38570D	-3.7866	26.28	misc.GDSL-motif lipase	carboxylesterase/ hydrolase/ hydrolase, acting on ester bonds | chr5:18622759-18624785 FORWARD
BnaC05g21950D	-1.94708	26.28	misc.GDSL-motif lipase	GDSL-motif lipase, putative | chr1:10044337-10046442 REVERSE
BnaC05g28210D	-1.86814	26.28	misc.GDSL-motif lipase	GDSL-motif lipase/hydrolase family protein | chr1:12267866-12269913 FORWARD
BnaC05g39430D	-3.23977	26.28	misc.GDSL-motif lipase	Symbols: GLIP4 | GLIP4; carboxylesterase/ lipase | chr3:4734616-4735993 REVERSE
BnaC05g46600D	-4.49242	26.28	misc.GDSL-motif lipase	GDSL-motif lipase/hydrolase family protein | chr3:1468398-1470551 REVERSE
BnaC07g09690D	-2.3406	26.28	misc.GDSL-motif lipase	GDSL-motif lipase/hydrolase family protein | chr1:10371839-10373766 FORWARD
BnaC07g10250D	-3.32972	26.28	misc.GDSL-motif lipase	GDSL-motif lipase, putative | chr1:10044337-10046442 REVERSE
BnaC07g10260D	-2.68912	26.28	misc.GDSL-motif lipase	GDSL-motif lipase, putative | chr1:10041641-10044147 REVERSE
BnaC07g23580D	-3.23266	26.28	misc.GDSL-motif lipase	GDSL-motif lipase/hydrolase family protein | chr3:9671517-9675927 FORWARD
BnaC03g53090D	1.26508	26.28	misc.GDSL-motif lipase	GDSL-motif lipase/hydrolase family protein | chr3:17949445-17951195 FORWARD
BnaA03g17630D	1.27202	26.28	misc.GDSL-motif lipase	GDSL-motif lipase/hydrolase family protein | chr2:15997114-15998906 FORWARD
BnaA06g18900D	2.06434	26.28	misc.GDSL-motif lipase	GDSL-motif lipase/hydrolase family protein | chr3:17949445-17951195 FORWARD
BnaC03g69950D	3.01197	26.28	misc.GDSL-motif lipase	Symbols: GLIP5 | GLIP5; carboxylesterase/ lipase | chr1:20137712-20139637 FORWARD
BnaC03g71620D	3.71052	26.28	misc.GDSL-motif lipase	GDSL-motif lipase/hydrolase family protein | chr5:22337701-22340100 FORWARD
BnaA03g11620D	4.30788	26.28	misc.GDSL-motif lipase	GDSL-motif lipase/hydrolase family protein | chr5:22337701-22340100 FORWARD
BnaA01g30950D	1.29567	26.28	misc.GDSL-motif lipase	GDSL-motif lipase/hydrolase family protein | chr3:3510663-3513060 REVERSE
BnaA01g31120D	2.70779	26.28	misc.GDSL-motif lipase	GDSL-motif lipase/hydrolase family protein | chr3:3510663-3513060 REVERSE
BnaA02g09320D	4.14975	26.28	misc.GDSL-motif lipase	GDSL-motif lipase/hydrolase family protein | chr5:22337701-22340100 FORWARD
BnaA02g24170D	-2.68328	26.28	misc.GDSL-motif lipase	GDSL-motif lipase/hydrolase family protein | chr5:18634079-18636699 FORWARD
BnaA03g11610D	7.73697	26.28	misc.GDSL-motif lipase	GDSL-motif lipase/hydrolase family protein | chr5:22337701-22340100 FORWARD
BnaA04g22460D	1.99559	26.28	misc.GDSL-motif lipase	GDSL-motif lipase/hydrolase family protein | chr2:16813330-16815251 FORWARD
BnaA05g31970D	-1.1652	26.28	misc.GDSL-motif lipase	GDSL-motif lipase/hydrolase family protein | chr3:1468398-1470551 REVERSE
BnaA08g17820D	1.06711	26.28	misc.GDSL-motif lipase	GDSL-motif lipase/hydrolase family protein | chr1:10375763-10377871 FORWARD
BnaA09g27190D	-1.39406	26.28	misc.GDSL-motif lipase	GDSL-motif lipase, putative | chr1:10044337-10046442 REVERSE
BnaA10g09310D	1.36018	26.28	misc.GDSL-motif lipase	GDSL-motif lipase/hydrolase family protein | chr5:22337701-22340100 FORWARD
BnaAnng00720D	-1.12492	26.28	misc.GDSL-motif lipase	GDSL-motif lipase/hydrolase family protein | chr5:915465-918485 FORWARD
BnaAnng22470D	7.56986	26.28	misc.GDSL-motif lipase	GDSL-motif lipase/hydrolase family protein | chr3:3053260-3055410 FORWARD
BnaAnng29090D	-8.24476	26.28	misc.GDSL-motif lipase	GDSL-motif lipase/hydrolase family protein | chr2:16813330-16815251 FORWARD
BnaAnng35560D	-8.49185	26.28	misc.GDSL-motif lipase	GDSL-motif lipase/hydrolase family protein | chr2:16813330-16815251 FORWARD
BnaC02g03000D	-2.30201	26.28	misc.GDSL-motif lipase	GDSL-motif lipase/hydrolase family protein | chr5:915465-918485 FORWARD
BnaC02g03010D	-1.84863	26.28	misc.GDSL-motif lipase	GDSL-motif lipase/hydrolase family protein | chr5:915465-918485 FORWARD
BnaC02g08040D	-2.71569	26.28	misc.GDSL-motif lipase	GDSL-motif lipase/hydrolase family protein | chr5:6110255-6112029 REVERSE
BnaC02g13410D	2.18803	26.28	misc.GDSL-motif lipase	GDSL-motif lipase/hydrolase family protein | chr5:22337701-22340100 FORWARD
BnaC02g32000D	-3.04668	26.28	misc.GDSL-motif lipase	GDSL-motif lipase/hydrolase family protein | chr5:18634079-18636699 FORWARD
BnaC03g59270D	1.09856	26.28	misc.GDSL-motif lipase	GDSL-motif lipase/hydrolase family protein | chr1:10375763-10377871 FORWARD
BnaC04g45730D	-2.73479	26.28	misc.GDSL-motif lipase	GDSL-motif lipase/hydrolase family protein | chr2:15997114-15998906 FORWARD
BnaC05g47350D	-2.35006	26.28	misc.GDSL-motif lipase	Symbols: ATLTL1, LTL1 | LTL1 (LI-TOLERANT LIPASE 1); carboxylesterase/ hydrolase, acting on ester bonds | chr3:1133320-1136316 REVERSE
BnaC06g10380D	-1.72731	26.28	misc.GDSL-motif lipase	Symbols: GLIP3 | GLIP3; carboxylesterase/ lipase | chr1:20151016-20152752 FORWARD
BnaC08g34430D	-2.31244	26.28	misc.GDSL-motif lipase	GDSL-motif lipase/hydrolase family protein | chr2:10024346-10026233 FORWARD
BnaC09g16910D	-3.79941	26.28	misc.GDSL-motif lipase	GDSL-motif lipase/hydrolase family protein | chr5:915465-918485 FORWARD
BnaCnng17040D	2.24793	26.28	misc.GDSL-motif lipase	GDSL-motif lipase/hydrolase family protein | chr1:26860118-26861726 FORWARD
BnaCnng44680D	-2.53343	26.28	misc.GDSL-motif lipase	GDSL-motif lipase, putative | chr1:10067563-10069177 REVERSE
BnaA01g27000D	-3.39154	26.3	misc.gluco-, galacto- and mannosidases	Symbols: BGLU44 | BGLU44 (B-S GLUCOSIDASE 44); (R)-amygdalin beta-glucosidase/ 4-methylumbelliferyl-beta-D-glucopyranoside beta-glucosidase/ beta-gentiobiose beta-glucosidase/ cellobiose glucosidase/ esculin beta-glucosidase/ hydrolase, hydrolyzing O-glycosyl compounds | chr3:6191557-6194452 FORWARD
BnaA01g27010D	-1.3722	26.3	misc.gluco-, galacto- and mannosidases	Symbols: BGLU44 | BGLU44 (B-S GLUCOSIDASE 44); (R)-amygdalin beta-glucosidase/ 4-methylumbelliferyl-beta-D-glucopyranoside beta-glucosidase/ beta-gentiobiose beta-glucosidase/ cellobiose glucosidase/ esculin beta-glucosidase/ hydrolase, hydrolyzing O-glycosyl compounds | chr3:6191557-6194452 FORWARD
BnaA03g01500D	-2.38606	26.3	misc.gluco-, galacto- and mannosidases	glycosyl hydrolase family 3 protein | chr5:1422799-1426879 FORWARD
BnaA03g08170D	-4.27302	26.3	misc.gluco-, galacto- and mannosidases	glycosyl hydrolase family 3 protein | chr5:7103927-7106701 REVERSE
BnaA03g44890D	-3.13484	26.3	misc.gluco-, galacto- and mannosidases	Symbols: BGLU47 | BGLU47 (Beta-glucosidase 47); catalytic/ cation binding / hydrolase, hydrolyzing O-glycosyl compounds | chr4:11561229-11563950 FORWARD
BnaA04g17070D	-1.68966	26.3	misc.gluco-, galacto- and mannosidases	Symbols: BGLU13 | BGLU13 (BETA GLUCOSIDASE 13); catalytic/ cation binding / hydrolase, hydrolyzing O-glycosyl compounds | chr5:18011146-18012882 FORWARD
BnaA06g01540D	-2.2718	26.3	misc.gluco-, galacto- and mannosidases	Symbols: BGL1, BGLU18 | BGLU18 (BETA GLUCOSIDASE 18); catalytic/ cation binding / hydrolase, hydrolyzing O-glycosyl compounds | chr1:19515151-19518160 FORWARD
BnaA06g05250D	-1.94795	26.3	misc.gluco-, galacto- and mannosidases	glycoside hydrolase family 2 protein | chr1:2895166-2899384 REVERSE
BnaA07g24990D	-1.12221	26.3	misc.gluco-, galacto- and mannosidases	Symbols: GCS1, KNF | GCS1 (GLUCOSIDASE 1); alpha-glucosidase | chr1:25280451-25286596 REVERSE
BnaA10g08370D	-1.12433	26.3	misc.gluco-, galacto- and mannosidases	Symbols: BGLU41 | BGLU41 (BETA GLUCOSIDASE 41); catalytic/ cation binding / hydrolase, hydrolyzing O-glycosyl compounds | chr5:22167636-22170235 REVERSE
BnaC01g34490D	-3.46713	26.3	misc.gluco-, galacto- and mannosidases	Symbols: BGLU44 | BGLU44 (B-S GLUCOSIDASE 44); (R)-amygdalin beta-glucosidase/ 4-methylumbelliferyl-beta-D-glucopyranoside beta-glucosidase/ beta-gentiobiose beta-glucosidase/ cellobiose glucosidase/ esculin beta-glucosidase/ hydrolase, hydrolyzing O-glycosyl compounds | chr3:6191557-6194452 FORWARD
BnaC03g01800D	-1.3388	26.3	misc.gluco-, galacto- and mannosidases	glycosyl hydrolase family 3 protein | chr5:1422799-1426879 FORWARD
BnaC04g40390D	-1.4607	26.3	misc.gluco-, galacto- and mannosidases	Symbols: BGLU13 | BGLU13 (BETA GLUCOSIDASE 13); catalytic/ cation binding / hydrolase, hydrolyzing O-glycosyl compounds | chr5:18011146-18012882 FORWARD
BnaC05g06540D	-2.12725	26.3	misc.gluco-, galacto- and mannosidases	glycoside hydrolase family 2 protein | chr1:2895166-2899384 REVERSE
BnaC05g20280D	-1.4563	26.3	misc.gluco-, galacto- and mannosidases	Symbols: BGLU40 | BGLU40 (BETA GLUCOSIDASE 40); catalytic/ cation binding / hydrolase, hydrolyzing O-glycosyl compounds | chr1:9178378-9181835 FORWARD
BnaC05g21330D	-1.12733	26.3	misc.gluco-, galacto- and mannosidases	glycoside hydrolase family 47 protein | chr1:9558635-9562381 FORWARD
BnaC06g12100D	-1.39386	26.3	misc.gluco-, galacto- and mannosidases	Symbols: BGLU42 | BGLU42 (BETA GLUCOSIDASE 42); beta-glucosidase/ catalytic/ cation binding / hydrolase, hydrolyzing O-glycosyl compounds | chr5:14542026-14546230 REVERSE
BnaC06g26720D	-2.25873	26.3	misc.gluco-, galacto- and mannosidases	Symbols: GCS1, KNF | GCS1 (GLUCOSIDASE 1); alpha-glucosidase | chr1:25280451-25286596 REVERSE
BnaC07g00200D	-2.11018	26.3	misc.gluco-, galacto- and mannosidases	glycosyl hydrolase family 5 protein / cellulase family protein | chr2:8920467-8923173 FORWARD
BnaCnng06540D	-1.76455	26.3	misc.gluco-, galacto- and mannosidases	glycoside hydrolase family 2 protein | chr1:2895166-2899384 REVERSE
BnaA07g05100D	1.69954	26.3	misc.gluco-, galacto- and mannosidases	Symbols: BGLU8 | BGLU8 (BETA GLUCOSIDASE 8); catalytic/ cation binding / hydrolase, hydrolyzing O-glycosyl compounds | chr3:23214371-23217045 FORWARD
BnaC01g40610D	1.75438	26.3	misc.gluco-, galacto- and mannosidases	Symbols: GLUC, BGLU25 | BGLU25 (BETA GLUCOSIDASE 25); catalytic/ cation binding / hydrolase, hydrolyzing O-glycosyl compounds | chr3:881006-884157 FORWARD
BnaA07g05110D	1.9788	26.3	misc.gluco-, galacto- and mannosidases	Symbols: BGLU8 | BGLU8 (BETA GLUCOSIDASE 8); catalytic/ cation binding / hydrolase, hydrolyzing O-glycosyl compounds | chr3:23214371-23217045 FORWARD
BnaA01g34060D	2.8576	26.3	misc.gluco-, galacto- and mannosidases	Symbols: GLUC, BGLU25 | BGLU25 (BETA GLUCOSIDASE 25); catalytic/ cation binding / hydrolase, hydrolyzing O-glycosyl compounds | chr3:881006-884157 FORWARD
BnaUnng03130D	2.95594	26.3	misc.gluco-, galacto- and mannosidases	Symbols: BGLU13 | BGLU13 (BETA GLUCOSIDASE 13); catalytic/ cation binding / hydrolase, hydrolyzing O-glycosyl compounds | chr5:18011146-18012882 FORWARD
BnaC04g03740D	3.08222	26.3	misc.gluco-, galacto- and mannosidases	Symbols: BGLU15 | BGLU15 (BETA GLUCOSIDASE 15); catalytic/ cation binding / hydrolase, hydrolyzing O-glycosyl compounds | chr2:18340921-18343849 FORWARD
BnaA04g25720D	3.36789	26.3	misc.gluco-, galacto- and mannosidases	Symbols: BGLU15 | BGLU15 (BETA GLUCOSIDASE 15); catalytic/ cation binding / hydrolase, hydrolyzing O-glycosyl compounds | chr2:18340921-18343849 FORWARD
BnaA10g00970D	8.4075	26.3	misc.gluco-, galacto- and mannosidases	glycosyl hydrolase family protein 5 / cellulase family protein / (1-4)-beta-mannan endohydrolase, putative | chr1:458133-460696 REVERSE
BnaC05g01080D	8.47534	26.3	misc.gluco-, galacto- and mannosidases	glycosyl hydrolase family protein 5 / cellulase family protein / (1-4)-beta-mannan endohydrolase, putative | chr1:458133-460696 REVERSE
BnaA01g17060D	1.75875	26.3	misc.gluco-, galacto- and mannosidases	glycosyl hydrolase family 5 protein / cellulase family protein | chr4:14018183-14020251 REVERSE
BnaA01g32790D	-1.72732	26.3	misc.gluco-, galacto- and mannosidases	Symbols: SFR2 | SFR2 (SENSITIVE TO FREEZING 2); beta-glucosidase/ hydrolase, hydrolyzing O-glycosyl compounds | chr3:2016385-2019677 FORWARD
BnaA01g34050D	2.83508	26.3	misc.gluco-, galacto- and mannosidases	Symbols: GLUC, BGLU25 | BGLU25 (BETA GLUCOSIDASE 25); catalytic/ cation binding / hydrolase, hydrolyzing O-glycosyl compounds | chr3:881006-884157 FORWARD
BnaA03g30810D	-4.02975	26.3	misc.gluco-, galacto- and mannosidases	Symbols: PYK10, PSR3.1, BGLU23 | PYK10; beta-glucosidase/ copper ion binding / fucosidase/ hydrolase, hydrolyzing O-glycosyl compounds | chr3:2840477-2843781 REVERSE
BnaA04g04110D	-1.10041	26.3	misc.gluco-, galacto- and mannosidases	glycoside hydrolase family 2 protein | chr3:20148336-20157138 REVERSE
BnaA05g03980D	7.22882	26.3	misc.gluco-, galacto- and mannosidases	Symbols: BGLU27 | BGLU27 (BETA GLUCOSIDASE 27); catalytic/ cation binding / hydrolase, hydrolyzing O-glycosyl compounds | chr3:22205947-22208952 FORWARD
BnaA05g04020D	4.89389	26.3	misc.gluco-, galacto- and mannosidases	Symbols: BGLU15 | BGLU15 (BETA GLUCOSIDASE 15); catalytic/ cation binding / hydrolase, hydrolyzing O-glycosyl compounds | chr2:18340921-18343849 FORWARD
BnaA05g26090D	-2.41163	26.3	misc.gluco-, galacto- and mannosidases	Symbols: BGLU10 | BGLU10 (BETA GLUCOSIDASE 10); catalytic/ cation binding / hydrolase, hydrolyzing O-glycosyl compounds | chr4:13861718-13864500 REVERSE
BnaA07g00500D	-2.16094	26.3	misc.gluco-, galacto- and mannosidases	glycosyl hydrolase family 5 protein / cellulase family protein | chr2:8920467-8923173 FORWARD
BnaA08g19770D	-1.46307	26.3	misc.gluco-, galacto- and mannosidases	Symbols: BGLU40 | BGLU40 (BETA GLUCOSIDASE 40); catalytic/ cation binding / hydrolase, hydrolyzing O-glycosyl compounds | chr1:9178378-9181835 FORWARD
BnaA08g26670D	-1.26421	26.3	misc.gluco-, galacto- and mannosidases	glycoside hydrolase family 2 protein | chr1:2895166-2899384 REVERSE
BnaA09g14750D	1.56208	26.3	misc.gluco-, galacto- and mannosidases	Symbols: BGLU13 | BGLU13 (BETA GLUCOSIDASE 13); catalytic/ cation binding / hydrolase, hydrolyzing O-glycosyl compounds | chr5:18011146-18012882 FORWARD
BnaA09g27870D	1.39821	26.3	misc.gluco-, galacto- and mannosidases	glycoside hydrolase family 47 protein | chr1:9558635-9562381 FORWARD
BnaA09g28990D	-1.24239	26.3	misc.gluco-, galacto- and mannosidases	Symbols: BGLU40 | BGLU40 (BETA GLUCOSIDASE 40); catalytic/ cation binding / hydrolase, hydrolyzing O-glycosyl compounds | chr1:9178378-9181835 FORWARD
BnaA09g40110D	-1.77866	26.3	misc.gluco-, galacto- and mannosidases	Symbols: BGLU10 | BGLU10 (BETA GLUCOSIDASE 10); catalytic/ cation binding / hydrolase, hydrolyzing O-glycosyl compounds | chr4:13861718-13864500 REVERSE
BnaA09g55500D	-2.27518	26.3	misc.gluco-, galacto- and mannosidases	Symbols: BGLU16 | BGLU16 (BETA GLUCOSIDASE 16); catalytic/ cation binding / hydrolase, hydrolyzing O-glycosyl compounds | chr3:22210246-22213840 FORWARD
BnaAnng19210D	-1.1499	26.3	misc.gluco-, galacto- and mannosidases	Symbols: BGLU16 | BGLU16 (BETA GLUCOSIDASE 16); catalytic/ cation binding / hydrolase, hydrolyzing O-glycosyl compounds | chr3:22210246-22213840 FORWARD
BnaAnng27500D	-1.03589	26.3	misc.gluco-, galacto- and mannosidases	glycoside hydrolase family 47 protein | chr5:17552130-17556670 REVERSE
BnaC01g20850D	1.42263	26.3	misc.gluco-, galacto- and mannosidases	glycosyl hydrolase family 5 protein / cellulase family protein | chr4:14018183-14020251 REVERSE
BnaC03g10370D	-1.93772	26.3	misc.gluco-, galacto- and mannosidases	glycosyl hydrolase family 3 protein | chr5:7103927-7106701 REVERSE
BnaC04g26290D	-1.48967	26.3	misc.gluco-, galacto- and mannosidases	glycoside hydrolase family 2 protein | chr3:20148336-20157138 REVERSE
BnaC04g26310D	-1.46694	26.3	misc.gluco-, galacto- and mannosidases	glycoside hydrolase family 2 protein | chr3:20148336-20157138 REVERSE
BnaC04g49630D	1.49825	26.3	misc.gluco-, galacto- and mannosidases	Symbols: BGLU15 | BGLU15 (BETA GLUCOSIDASE 15); catalytic/ cation binding / hydrolase, hydrolyzing O-glycosyl compounds | chr2:18340921-18343849 FORWARD
BnaC05g40180D	-2.18539	26.3	misc.gluco-, galacto- and mannosidases	Symbols: BGLU10 | BGLU10 (BETA GLUCOSIDASE 10); catalytic/ cation binding / hydrolase, hydrolyzing O-glycosyl compounds | chr4:13861718-13864500 REVERSE
BnaC06g05340D	-2.71376	26.3	misc.gluco-, galacto- and mannosidases	Symbols: BGL1, BGLU18 | BGLU18 (BETA GLUCOSIDASE 18); catalytic/ cation binding / hydrolase, hydrolyzing O-glycosyl compounds | chr1:19515151-19518160 FORWARD
BnaC07g36890D	-2.94251	26.3	misc.gluco-, galacto- and mannosidases	Symbols: BGLU47 | BGLU47 (Beta-glucosidase 47); catalytic/ cation binding / hydrolase, hydrolyzing O-glycosyl compounds | chr4:11561229-11563950 FORWARD
BnaC08g30370D	-2.5356	26.3	misc.gluco-, galacto- and mannosidases	Symbols: BGLU16 | BGLU16 (BETA GLUCOSIDASE 16); catalytic/ cation binding / hydrolase, hydrolyzing O-glycosyl compounds | chr3:22210246-22213840 FORWARD
BnaC08g32450D	-1.21718	26.3	misc.gluco-, galacto- and mannosidases	Symbols: BGLU10 | BGLU10 (BETA GLUCOSIDASE 10); catalytic/ cation binding / hydrolase, hydrolyzing O-glycosyl compounds | chr4:13861718-13864500 REVERSE
BnaC08g38300D	-1.00738	26.3	misc.gluco-, galacto- and mannosidases	arginine/serine-rich protein-related | chr1:29753648-29754388 FORWARD
BnaC09g15390D	1.91754	26.3	misc.gluco-, galacto- and mannosidases	Symbols: BGLU13 | BGLU13 (BETA GLUCOSIDASE 13); catalytic/ cation binding / hydrolase, hydrolyzing O-glycosyl compounds | chr5:18011146-18012882 FORWARD
BnaCnng45520D	-1.99022	26.3	misc.gluco-, galacto- and mannosidases	Symbols: BGLU41 | BGLU41 (BETA GLUCOSIDASE 41); catalytic/ cation binding / hydrolase, hydrolyzing O-glycosyl compounds | chr5:22167636-22170235 REVERSE
BnaA01g34890D	-2.77529	26.4	misc.beta 1,3 glucan hydrolases	glycosyl hydrolase family 17 protein | chr4:14451421-14453915 REVERSE
BnaA04g17980D	-2.40972	26.4	misc.beta 1,3 glucan hydrolases	FUNCTIONS IN: molecular_function unknown; INVOLVED IN: biological_process unknown; LOCATED IN: endomembrane system; CONTAINS InterPro DOMAIN/s: X8 (InterPro:IPR012946); BEST Arabidopsis thaliana protein match is: unknown protein (TAIR:AT1G29380.1); Has 799 Blast hits to 763 proteins in 42 species: Archae - 0; Bacteria - 0; Metazoa - 0; Fungi - 23; Plants - 773; Viruses - 0; Other Eukaryotes - 3 (…
BnaA06g12810D	-5.17519	26.4	misc.beta 1,3 glucan hydrolases	Symbols: PDCB3 | PDCB3 (PLASMODESMATA CALLOSE-BINDING PROTEIN 3); callose binding / polysaccharide binding | chr1:6418858-6420557 REVERSE
BnaA07g37930D	-2.75161	26.4	misc.beta 1,3 glucan hydrolases	Symbols: PDCB5 | PDCB5 (PLASMODESMATA CALLOSE-BINDING PROTEIN 5); callose binding / polysaccharide binding | chr3:21515199-21516487 REVERSE
BnaA08g13450D	-3.65105	26.4	misc.beta 1,3 glucan hydrolases	glycosyl hydrolase family 17 protein | chr4:14451421-14453915 REVERSE
BnaA08g22500D	-4.2718	26.4	misc.beta 1,3 glucan hydrolases	Symbols: PDCB3 | PDCB3 (PLASMODESMATA CALLOSE-BINDING PROTEIN 3); callose binding / polysaccharide binding | chr1:6418858-6420557 REVERSE
BnaA10g11860D	-4.8413	26.4	misc.beta 1,3 glucan hydrolases	glycosyl hydrolase family 17 protein | chr5:23641142-23642853 REVERSE
BnaC03g56580D	-2.45629	26.4	misc.beta 1,3 glucan hydrolases	beta-1,3-glucanase-related | chr1:4739873-4741038 REVERSE
BnaC03g77660D	-2.24793	26.4	misc.beta 1,3 glucan hydrolases	glycosyl hydrolase family 17 protein | chr4:14451421-14453915 REVERSE
BnaC05g07010D	-3.68182	26.4	misc.beta 1,3 glucan hydrolases	glucan endo-1,3-beta-glucosidase-related | chr1:3053901-3055360 FORWARD
BnaC05g14330D	-2.18057	26.4	misc.beta 1,3 glucan hydrolases	Symbols: PDCB3 | PDCB3 (PLASMODESMATA CALLOSE-BINDING PROTEIN 3); callose binding / polysaccharide binding | chr1:6418858-6420557 REVERSE
BnaC06g16250D	-2.60237	26.4	misc.beta 1,3 glucan hydrolases	Symbols: PDCB5 | PDCB5 (PLASMODESMATA CALLOSE-BINDING PROTEIN 5); callose binding / polysaccharide binding | chr3:21515199-21516487 REVERSE
BnaC07g11250D	-6.49185	26.4	misc.beta 1,3 glucan hydrolases	alpha-glucosidase, putative | chr1:8626315-8630971 REVERSE
BnaC08g18190D	-5.41714	26.4	misc.beta 1,3 glucan hydrolases	Symbols: PDCB3 | PDCB3 (PLASMODESMATA CALLOSE-BINDING PROTEIN 3); callose binding / polysaccharide binding | chr1:6418858-6420557 REVERSE
BnaCnng46030D	-1.20908	26.4	misc.beta 1,3 glucan hydrolases	beta-1,3-glucanase-related | chr1:9148710-9150250 REVERSE
BnaC06g30470D	2.8203	26.4	misc.beta 1,3 glucan hydrolases	beta-1,3-glucanase-related | chr1:9148710-9150250 REVERSE
BnaA01g06030D	4.78274	26.4	misc.beta 1,3 glucan hydrolases	glycosyl hydrolase family 17 protein | chr4:15141200-15143391 FORWARD
BnaA03g11520D	4.82433	26.4	misc.beta 1,3 glucan hydrolases	glycosyl hydrolase family 17 protein | chr5:22388782-22390714 FORWARD
BnaC01g07290D	5.74294	26.4	misc.beta 1,3 glucan hydrolases	glycosyl hydrolase family 17 protein | chr4:15141200-15143391 FORWARD
BnaC03g14350D	6.11343	26.4	misc.beta 1,3 glucan hydrolases	glycosyl hydrolase family 17 protein | chr5:22388782-22390714 FORWARD
BnaC09g31740D	7.19263	26.4	misc.beta 1,3 glucan hydrolases	glycosyl hydrolase family 17 protein | chr5:22388782-22390714 FORWARD
BnaA02g09200D	8.83004	26.4	misc.beta 1,3 glucan hydrolases	glycosyl hydrolase family 17 protein | chr5:22388782-22390714 FORWARD
BnaC02g13250D	9.0174	26.4	misc.beta 1,3 glucan hydrolases	glycosyl hydrolase family 17 protein | chr5:22388782-22390714 FORWARD
BnaA10g09420D	10.1554	26.4	misc.beta 1,3 glucan hydrolases	glycosyl hydrolase family 17 protein | chr5:22388782-22390714 FORWARD
BnaA03g51300D	-1.63577	26.4	misc.beta 1,3 glucan hydrolases	glycosyl hydrolase family 17 protein | chr4:15141200-15143391 FORWARD
BnaA05g02830D	-3.83458	26.4	misc.beta 1,3 glucan hydrolases	Symbols: PDCB5 | PDCB5 (PLASMODESMATA CALLOSE-BINDING PROTEIN 5); callose binding / polysaccharide binding | chr3:21515199-21516487 REVERSE
BnaC01g09170D	1.12939	26.4	misc.beta 1,3 glucan hydrolases	glycosyl hydrolase family 17 protein | chr4:14451421-14453915 REVERSE
BnaC04g41610D	-3.08037	26.4	misc.beta 1,3 glucan hydrolases	FUNCTIONS IN: molecular_function unknown; INVOLVED IN: biological_process unknown; LOCATED IN: endomembrane system; CONTAINS InterPro DOMAIN/s: X8 (InterPro:IPR012946); BEST Arabidopsis thaliana protein match is: unknown protein (TAIR:AT1G29380.1); Has 799 Blast hits to 763 proteins in 42 species: Archae - 0; Bacteria - 0; Metazoa - 0; Fungi - 23; Plants - 773; Viruses - 0; Other Eukaryotes - 3 (…
BnaC04g52820D	-9.32942	26.4	misc.beta 1,3 glucan hydrolases	Symbols: PDCB5 | PDCB5 (PLASMODESMATA CALLOSE-BINDING PROTEIN 5); callose binding / polysaccharide binding | chr3:21515199-21516487 REVERSE
BnaC06g25420D	-1.1556	26.4	misc.beta 1,3 glucan hydrolases	beta-1,3-glucanase-related | chr1:9148710-9150250 REVERSE
BnaCnng26200D	-1.58224	26.4	misc.beta 1,3 glucan hydrolases	Symbols: PDCB4 | PDCB4 (PLASMODESMATA CALLOSE-BINDING PROTEIN 4); callose binding / polysaccharide binding | chr1:26050197-26052567 REVERSE
BnaCnng31990D	-2.63227	26.4	misc.beta 1,3 glucan hydrolases	glycosyl hydrolase family 17 protein | chr5:23641142-23642853 REVERSE
BnaA03g15820D	-1.6199	26.5	misc.acyl transferases	O-acetyltransferase family protein | chr2:14518406-14522139 FORWARD
BnaA03g26860D	-2.88906	26.5	misc.acyl transferases	acetylesterase, putative | chr4:485833-488007 FORWARD
BnaA03g41350D	-2.67659	26.5	misc.acyl transferases	diacylglycerol acyltransferase family | chr3:19110596-19112760 FORWARD
BnaA07g35650D	-1.95856	26.5	misc.acyl transferases	Symbols: EMB2753 | EMB2753 (EMBRYO DEFECTIVE 2753); binding | chr1:30227485-30234981 REVERSE
BnaC01g23350D	-1.30933	26.5	misc.acyl transferases	diacylglycerol acyltransferase family | chr3:19110596-19112760 FORWARD
BnaC03g18970D	-1.56635	26.5	misc.acyl transferases	O-acetyltransferase family protein | chr2:14518406-14522139 FORWARD
BnaC03g31810D	-4.08112	26.5	misc.acyl transferases	acetylesterase, putative | chr4:485833-488007 FORWARD
BnaC06g19640D	-1.21894	26.5	misc.acyl transferases	phospholipid/glycerol acyltransferase family protein | chr1:30412544-30415113 REVERSE
BnaA02g28370D	-3.16993	26.5	misc.acyl transferases	esterase/lipase/thioesterase family protein | chr3:9892794-9896337 FORWARD
BnaA06g32640D	-1.93563	26.5	misc.acyl transferases	esterase/lipase/thioesterase family protein | chr3:9892794-9896337 FORWARD
BnaA07g35160D	-1.32146	26.5	misc.acyl transferases	phospholipid/glycerol acyltransferase family protein | chr1:30412544-30415113 REVERSE
BnaC02g48110D	-7.16323	26.5	misc.acyl transferases	esterase/lipase/thioesterase family protein | chr3:9892794-9896337 FORWARD
BnaC07g23920D	-1.54834	26.5	misc.acyl transferases	esterase/lipase/thioesterase family protein | chr3:9892794-9896337 FORWARD
BnaC07g32270D	-1.27839	26.5	misc.acyl transferases	diacylglycerol acyltransferase family | chr3:19110596-19112760 FORWARD
BnaA01g35410D	-2.11548	26.6	misc.O-methyl transferases	Symbols: ATPRMT7, PRMT7 | PRMT7 (PROTEIN ARGININE METHYLTRANSFERASE 7); methyltransferase | chr4:9336703-9340869 FORWARD
BnaA04g04870D	-1.24217	26.6	misc.O-methyl transferases	O-diphenol-O-methyl transferase, putative | chr3:19695643-19697542 FORWARD
BnaA05g30580D	-2.92642	26.6	misc.O-methyl transferases	Symbols: ATPRMT4B, PRMT4B | protein arginine N-methyltransferase family protein | chr3:2185143-2189387 REVERSE
BnaA06g14950D	-1.52893	26.6	misc.O-methyl transferases	O-methyltransferase, putative | chr1:7399062-7400605 REVERSE
BnaA07g11070D	-2.93517	26.6	misc.O-methyl transferases	O-methyltransferase, putative | chr1:7386839-7388428 REVERSE
BnaA07g28060D	-3.36746	26.6	misc.O-methyl transferases	S-adenosyl-L-methionine-dependent methyltransferases superfamily protein; FUNCTIONS IN: methyltransferase activity; INVOLVED IN: metabolic process; LOCATED IN: chloroplast; EXPRESSED IN: 20 plant structures; EXPRESSED DURING: 13 growth stages; CONTAINS InterPro DOMAIN/s: Methyltransferase type 11 (InterPro:IPR013216); BEST Arabidopsis thaliana protein match is: S-adenosyl-L-methionine-dependent m…
[truncated: 17,702 more rows]
