# Supplementary material for: Characterization of cold stress responses in different rapeseed ecotypes based on metabolomics and transcriptomics analyses
Source: PeerJ. 2020 Mar 31;8:e8704. doi: 10.7717/peerj.8704 (PMC7120054; doi:10.7717/peerj.8704)
Supplement: Supplemental Information 13 [file peerj-08-8704-s013.xlsx]

## Sheet: S11
Table S11 Metabolites identified in winter and spring B. napus ecotypes after cold stress using LC-MS analysis.
Index	Q1 (Da)	Q3 (Da)	Compounds	Class	Ion mode	Rt (min)	Molecular Weight (Da)	Ionization model	QC1	QC2	QC3	28S1	28S2	28S3	4S1	4S2	4S3	28W1	28W2	28W3	4W1	4W2	4W3	KEGG ID	C_ID	Pathway	KEGG_B_class	KEGG_A_class
pma0104	369.1	207.5	N-sinapoyl hydroxycoumarin	Coumarins	Positive	3.72	368.1	[M+H]+	1510000	1680000	2030000	1470000	1850000	1620000	2030000	4610000	4820000	9	642000	675000	332000	9	9	-
pma0110	399	207.5	O-Sinapoyl quinic acid	Quinate and its derivatives	Positive	3.04	398	[M+H]+	92100	148000	88500	66100	131000	117000	289000	162000	162000	71300	44000	65300	88500	132000	139000	-
pma0134	121	77.1	D(-)-Threose	Carbohydrates	Positive	1.14	120	[M+H]+	109000	156000	183000	228000	164000	339000	528000	489000	383000	491000	547000	426000	215000	176000	276000	-
pma0149	341.1	179.4	Sinapoyl malate	Organic acids	Positive	2.47	340.1	[M+H]+	821000	1440000	1660000	1120000	739000	1170000	1110000	1260000	1240000	1660000	2090000	1530000	1910000	1390000	1550000	C02887	C02887	ko00940//Phenylpropanoid biosynthesis	Biosynthesis of other secondary metabolites	Metabolism
pma0249	479.1	302.8	Selgin 5-O-hexoside	Flavone	Positive	3.54	478.1	[M+H]+	10100000	12500000	11500000	9200000	7800000	7680000	13000000	39100000	28200000	1240000	1330000	1160000	1940000	1910000	2320000	-
pma0461	277.2	157.4	14,15-Dehydrocrepenynic acid	Lipids_Fatty acids	Positive	8.47	276.2	[M+H]+	2260000	1960000	1400000	2870000	2210000	2210000	1640000	1500000	2500000	1970000	2220000	1810000	960000	1040000	902000	-
pma0760	565	317.8	Selgin O-malonylhexoside	Flavone	Positive	4.32	564	[M+H]+	130000	96400	101000	9	83600	54700	141000	561000	151000	9	9	9	9	9	9	-
pma0791	521	317.6	Naringenin O-malonylhexoside	Flavanone	Positive	4.46	520	[M+H]+	852000	725000	700000	678000	819000	773000	1300000	696000	734000	662000	496000	429000	567000	633000	557000	-
pma0825	503	255.6	Chrysin O-malonylhexoside	Flavone	Positive	5.23	502	[M+H]+	86400	75300	65900	96800	106000	64600	103000	95500	122000	70800	64500	80100	55800	61600	83400	-
pma0948	138.1	77.2	Hydroxyphenethylamine	Others	Positive	1.18	137.1	[M+H]+	219000	268000	291000	272000	197000	339000	220000	207000	220000	530000	458000	342000	150000	176000	286000	-
pma1751	286	124.3	Nicotinic acid-hexoside	Nicotinic acid derivatives	Positive	2.03	285	[M+H]+	9450000	19900000	19100000	15400000	14200000	20200000	28900000	19600000	27100000	22700000	20700000	16300000	19200000	17800000	8310000	-
pma2405	280	178.4	Feruloylcholine	Cholines	Positive	2.77	280	Protonated	3050000	5680000	5450000	5430000	4400000	4510000	5370000	8270000	4440000	3450000	2850000	4720000	8350000	4670000	6870000	-
pma2681	206.1	132.4	Xanthurenic acid	Organic acids	Positive	2.2	205.1	[M+H]+	43300	93500	101000	104000	100000	91200	104000	114000	84000	96200	115000	126000	97200	87800	9	C02470	C02470	ko00380//Tryptophan metabolism	Amino acid metabolism	Metabolism
pma2987	142.1	82.9	Histidinol	Others	Positive	0.58	141.1	[M+H]+	5290000	5850000	4800000	13000000	12300000	8250000	7780000	6800000	6080000	5160000	5660000	6450000	4900000	5580000	4500000	C00860	C00860	ko01100//Metabolic pathways;ko01110//Biosynthesis of secondary metabolites;ko01230//Biosynthesis of amino acids;ko00340//Histidine metabolism	Amino acid metabolism;Global and Overview	Metabolism
pma3101	256.2	124	Nicotinate ribonucleoside	Nicotinic acid derivatives	Positive	0.8	255.2	[M+H]+	738000	1290000	1310000	910000	749000	851000	1160000	1230000	1350000	1270000	1290000	1490000	1600000	1760000	1510000	C05841	C05841	ko01100//Metabolic pathways;ko00760//Nicotinate and nicotinamide metabolism	Metabolism of cofactors and vitamins;Global and Overview	Metabolism
pma3606	295.2	179.5	9-Hydroxy-(10E,12Z,15Z)-octadecatrienoic acid	Lipids_Fatty acids	Positive	9.18	294.2	[M+H]+	255000	223000	180000	257000	190000	219000	169000	251000	279000	213000	185000	191000	181000	180000	197000	-
pma3649	132.1	86.2	5-Aminolevulinate	Organic acids	Positive	0.99	131.1	[M+H]+	1630000	3280000	2300000	3940000	3240000	4730000	3130000	3850000	3070000	2240000	3600000	2710000	1760000	3500000	1710000	C00430	C00430	ko01100//Metabolic pathways;ko01110//Biosynthesis of secondary metabolites;ko02010//ABC transporters;ko00260//Glycine, serine and threonine metabolism;ko00860//Porphyrin and chlorophyll metabolism	Amino acid metabolism;Membrane transport;Metabolism of cofactors and vitamins;Global and Overview	Metabolism;Environmental Information Processing
pma3724	369.1	207.5	1-O-Feruloyl quinic acid	Quinate and its derivatives	Positive	3.43	368.1	[M+H]+	12500000	13800000	14500000	13400000	12600000	16600000	14900000	5440000	11000000	17900000	25000000	11700000	10500000	19500000	12300000	-
pma6262	349.2	147	N'-p-coumaroylspermine	Phenolamides	Positive	2.46	348.2	[M+H]+	9	9	9	9	9	9	9	9	9	9	166000	9	9	9	9	-
pma6270	258.2	125.2	sn-Glycero-3-phosphocholine	Cholines	Positive	0.8	258.2	Protonated	4510000	7110000	6900000	7580000	15100000	4650000	8030000	8110000	13700000	7370000	4240000	6070000	7360000	4640000	5170000	C00670	C00670	ko00564//Glycerophospholipid metabolism;ko00565//Ether lipid metabolism	Lipid metabolism	Metabolism
pma6298	96	80.2	3-Hydroxypyridine	Others	Positive	1.07	95	[M+H]+	63300	77000	95200	63600	67500	57800	114000	68800	72400	69400	83800	188000	59400	83900	78200	-
pma6455	229	157.1	Ribulose-5-phosphate	Carbohydrates	Negative	1.05	230	[M-H]-	55800	60700	44800	35300	45900	21000	29100	45000	52400	18400	14100	21100	23400	33000	27900	C00117	C00117	ko01100//Metabolic pathways;ko01110//Biosynthesis of secondary metabolites;ko01120//Microbial metabolism in diverse environments;ko01130//Biosynthesis of antibiotics;ko01230//Biosynthesis of amino acids;ko00230//Purine metabolism;ko01200//Carbon metabolism;ko00030//Pentose phosphate pathway;ko00710//Carbon fixation in photosynthetic organisms	Global and Overview;Nucleotide metabolism;Energy metabolism;Carbohydrate metabolism	Metabolism
pma6460	337	275.8	5-O-p-Coumaroylquinic acid	Quinate and its derivatives	Negative	3.24	338	[M-H]-	5330000	7350000	7640000	10500000	10900000	10400000	6250000	7210000	6480000	4080000	4170000	3970000	3860000	3580000	3960000	-
pma6499	509.3	347.9	Limocitrin O-hexoside	Flavone	Positive	3.46	508.3	[M+H]+	350000	309000	271000	373000	337000	332000	308000	382000	316000	326000	336000	216000	298000	349000	355000	-
pma6561	341	179.2	Caffeic acid O-glucoside	Hydroxycinnamoyl derivatives	Negative	3.01	342	[M-H]-	341000	474000	522000	351000	296000	384000	293000	543000	398000	387000	686000	572000	586000	519000	645000	-
pma6599	207.1	147.4	6-Hydroxymethylherniarin	Hydroxycinnamoyl derivatives	Positive	3.21	206.1	[M+H]+	2410000	2400000	2640000	1710000	2620000	1120000	3460000	4520000	2800000	2860000	2270000	2930000	3090000	2010000	2280000	-
pma6639	479.2	318	Isorhamnetin O-hexoside	Flavonol	Positive	4.11	478.2	[M+H]+	6770000	6440000	6210000	1640000	1490000	1860000	5570000	32300000	15800000	253000	127000	445000	547000	293000	464000	-
pma6647	625.2	463.6	C-hexosyl-chrysoeriol O-hexoside	Flavone C-glycosides	Positive	3.49	624.2	[M+H]+	89500	104000	117000	139000	106000	157000	178000	182000	164000	56000	81800	35700	90800	92200	134000	-
pmb0064	374.1	198.6	DIMBOA glucoside	Others	Positive	2.18	373.1	[M+H]+	296000	544000	511000	847000	824000	811000	1230000	577000	764000	339000	227000	283000	226000	285000	196000	C04831
pmb0069	122	105.3	Benzamide	Others	Positive	2.31	121	[M+H]+	441000	664000	562000	666000	376000	862000	313000	636000	326000	739000	945000	567000	729000	538000	600000	C09815	C09815	ko01120//Microbial metabolism in diverse environments	Global and Overview	Metabolism
pmb0108	375.2	137.6	Feruloyl syringic acid	Hydroxycinnamoyl derivatives	Positive	3.43	374.2	[M+H]+	272000	325000	295000	219000	186000	192000	312000	196000	257000	272000	225000	196000	232000	252000	213000	-
pmb0115	225.1	151.4	3-Hydroxykynurenine	Amino acid derivatives	Positive	3.6	224.1	[M+H]+	1010000	1660000	655000	1390000	1360000	1070000	972000	1100000	1010000	1240000	967000	404000	1370000	1300000	1440000	C02794
pmb0142	165.1	95.5	Caffeic aldehyde	Hydroxycinnamoyl derivatives	Positive	5.99	164.1	[M+H]+	1130000	967000	938000	1060000	891000	980000	990000	812000	989000	1080000	1090000	1030000	702000	753000	721000	C10945	C10945	ko01110//Biosynthesis of secondary metabolites;ko00940//Phenylpropanoid biosynthesis	Biosynthesis of other secondary metabolites;Global and Overview	Metabolism
pmb0149	351	259.8	MAG (18:4) isomer1	Lipids_Glycerolipids	Positive	6.62	350	[M+H]+	95800	81200	64900	107000	58700	109000	47600	67900	103000	94000	94800	98800	36900	33700	37200	-
pmb0159	696.4	696.2	DGMG (18:2) isomer2	Lipids_Glycerolipids	Positive	7.53	695.4	[M+H]+	366000	308000	295000	238000	191000	264000	369000	927000	275000	600000	364000	289000	224000	246000	364000	-
pmb0160	353.3	261.8	MAG (18:3) isomer5	Lipids_Glycerolipids	Positive	7.53	352.3	[M+H]+	6420000	4640000	4330000	3940000	3260000	4490000	6040000	14200000	4220000	8870000	5210000	4390000	3380000	3750000	5350000	-
pmb0161	696.4	337.8	DGMG (18:2) isomer1	Lipids_Glycerolipids	Positive	8.05	695.4	[M+H]+	343000	258000	219000	252000	225000	262000	285000	755000	182000	341000	293000	278000	183000	199000	309000	-
pmb0163	696.4	696.3	DGMG (18:2) isomer3	Lipids_Glycerolipids	Positive	8.24	695.4	[M+H]+	133000	88400	85300	103000	92100	110000	85800	117000	88100	138000	92600	92200	61100	69700	115000	-
pmb0164	355.1	263.8	MAG (18:2) isomer1	Lipids_Glycerolipids	Positive	8.38	354.1	[M+H]+	27500	19600	16900	19100	11800	16200	27000	45400	14200	33100	32200	19100	6480	8180	13700	-
pmb0165	494.3	476.6	LysoPC 16:1	Lipids_Glycerophospholipids	Positive	8.48	493.3	[M+H]+	67900	39500	39300	38600	33700	26800	84200	57000	44600	37000	44400	31800	68600	45200	63400	-
pmb0168	700.1	184.4	PC 16:1/14:1	Lipids_Glycerophospholipids	Positive	9.28	699.1	[M+H]+	34000	24200	22100	26500	20800	23800	9	9710	6000	37100	23000	49800	44200	37900	44100	-
pmb0197	298.1	166.5	N2-methylguanosine	Nucleotide and its derivates	Positive	1.14	297.1	[M+H]+	187000	451000	444000	557000	495000	402000	290000	311000	326000	580000	527000	470000	416000	363000	301000	-
pmb0202	153	136.4	Xanthine	Nucleotide and its derivates	Positive	1.16	152	[M+H]+	239000	321000	290000	330000	205000	403000	195000	186000	203000	473000	455000	398000	133000	197000	165000	C00385	C00385	ko01100//Metabolic pathways;ko01110//Biosynthesis of secondary metabolites;ko01120//Microbial metabolism in diverse environments;ko00230//Purine metabolism;ko00232//Caffeine metabolism	Biosynthesis of other secondary metabolites;Global and Overview;Nucleotide metabolism	Metabolism
pmb0242	310	251.6	Sinapoylcholine	Cholines	Positive	2.96	310	Protonated	2550000	4850000	3830000	147000	50000	3670000	115000	51000	5760000	5560000	10900000	2760000	1270000	6180000	7080000	C00933	C00933	ko00940//Phenylpropanoid biosynthesis	Biosynthesis of other secondary metabolites	Metabolism
pmb0247	137.3	94.3	p-Aminobenzoate	Benzoic acid derivatives	Positive	3.19	136.3	[M+H]+	590000	493000	363000	480000	607000	511000	600000	269000	405000	615000	603000	506000	591000	268000	299000	C00568	C00568	ko01100//Metabolic pathways;ko01120//Microbial metabolism in diverse environments;ko00790//Folate biosynthesis	Metabolism of cofactors and vitamins;Global and Overview	Metabolism
pmb0292	387.1	331.8	Cholesterol	Others	Positive	7.59	386.1	[M+H]+	691000	516000	509000	830000	531000	516000	719000	403000	412000	735000	342000	545000	553000	309000	630000	C00187	C00187	ko01100//Metabolic pathways;ko01120//Microbial metabolism in diverse environments;ko00100//Steroid biosynthesis	Lipid metabolism;Global and Overview	Metabolism
pmb0296	357.2	339.9	MAG (18:1) isomer2	Lipids_Glycerolipids	Positive	8.8	356.2	[M+H]+	130000	61100	63500	115000	90400	118000	115000	207000	49200	133000	90400	83600	39100	63900	101000	-
pmb0302	126.1	97.3	2-Aminoethylphosphonate	Others	Positive	3.66	125.1	[M+H]+	83200	65500	72300	33800	50900	38600	31100	61100	45300	20600	38500	32000	37600	38000	9	C03557	C03557	ko01100//Metabolic pathways;ko01120//Microbial metabolism in diverse environments;ko02010//ABC transporters	Global and Overview;Membrane transport	Metabolism;Environmental Information Processing
pmb0312	176.1	133.4	5-methoxyindole-3-carbaldehyde	Indole derivatives	Positive	3.63	175.1	[M+H]+	196000	209000	269000	257000	215000	213000	254000	319000	257000	282000	216000	274000	255000	165000	189000	-
pmb0325	321.1	177.5	N-Feruloyl spermidine	Phenolamides	Positive	2.82	320.1	[M+H]+	4880000	5390000	5140000	8240000	6470000	3550000	5410000	5120000	6740000	11500000	7860000	6390000	7480000	4740000	6510000	-
pmb0374	136.1	119.3	Aminopurine	Others	Positive	1.89	135.1	[M+H]+	2440000	3030000	3380000	3330000	8500000	2560000	1710000	2680000	1310000	3430000	1810000	3440000	1940000	803000	3580000	-
pmb0382	339.1	177.5	O-Feruloyl 4-hydroxylcoumarin	Coumarins	Positive	3.84	338.1	[M+H]+	2740000	2870000	2460000	2060000	3780000	1820000	2960000	5500000	3630000	119000	184000	315000	278000	116000	129000	-
pmb0423	195.1	177.5	Hydroxy-methoxycinnamate	Hydroxycinnamoyl derivatives	Positive	3.19	194.1	[M+H]+	830000	1080000	1040000	955000	1180000	1230000	639000	358000	579000	1890000	1070000	934000	1260000	1230000	1280000	-
pmb0426	219.1	189.5	5-Methoxy-N,N-dimethyltryptamine	Tryptamine derivatives	Positive	3.78	218.1	[M+H]+	235000	259000	248000	268000	327000	303000	386000	203000	305000	120000	144000	110000	137000	202000	144000	C08309
pmb0449	162.1	98.3	2-Aminoadipic acid (L-Homoglutamic acid)	Amino acids	Positive	0.8	161.1	[M+H]+	3140000	3750000	3760000	4870000	6260000	4360000	2520000	3170000	3980000	2840000	3130000	3580000	3350000	3440000	3310000	C00956	C00956	ko01100//Metabolic pathways;ko01110//Biosynthesis of secondary metabolites;ko01130//Biosynthesis of antibiotics;ko01230//Biosynthesis of amino acids;ko01210//2Oxocarboxylic acid metabolism;ko00310//Lysine degradation;ko00300//Lysine biosynthesis	Amino acid metabolism;Global and Overview	Metabolism
pmb0464	458.1	116.4	Aspartic acid di-O-glucoside	Amino acid derivatives	Positive	0.79	457.1	[M+H]+	7660000	9680000	9810000	8210000	9390000	6560000	10400000	8920000	12400000	7530000	5780000	9670000	14000000	11100000	12400000	-
pmb0475	671.2	671	Gallic acid O-feruloyl-O-hexosyl-O-hexoside	Hydroxycinnamoyl derivatives	Positive	2.83	670.2	[M+H]+	198000	301000	267000	361000	475000	501000	219000	163000	207000	423000	316000	246000	254000	163000	180000	-
pmb0484	104.1	60.2	Choline	Cholines	Positive	0.74	103.1	[M+H]+	5390000	7760000	7760000	7890000	7170000	8180000	8020000	7140000	9180000	8080000	7960000	8530000	7380000	7590000	7260000	C00114	C00114	ko01100//Metabolic pathways;ko02010//ABC transporters;ko00260//Glycine, serine and threonine metabolism;ko00564//Glycerophospholipid metabolism	Global and Overview;Membrane transport;Lipid metabolism;Amino acid metabolism	Environmental Information Processing;Metabolism
pmb0490	235.1	147.5	N-p-Coumaroyl putrescine	Phenolamides	Positive	2.27	234.1	[M+H]+	510000	892000	790000	773000	792000	618000	1090000	1460000	759000	893000	796000	947000	963000	608000	689000	C18326	C18326	ko00330//Arginine and proline metabolism	Amino acid metabolism	Metabolism
pmb0492	584.2	325.8	N',N",N"'-p-coumaroyl-cinnamoyl-caffeoyl spermidine	Phenolamides	Positive	2.49	583.2	[M+H]+	950000	2120000	2110000	966000	997000	680000	1780000	917000	820000	480000	716000	334000	1040000	1080000	1740000	-
pmb0494	295	207.6	N-Sinapoyl putrescine	Phenolamides	Positive	2.7	294	[M+H]+	483000	896000	979000	609000	625000	582000	737000	1660000	1050000	747000	1010000	1050000	857000	690000	956000	-
pmb0496	307.2	177.5	N-Feruloyl agmatine	Phenolamides	Positive	2.71	306.2	[M+H]+	641000	820000	942000	1180000	1260000	1140000	1050000	803000	1180000	694000	973000	464000	344000	668000	320000	C18325	C18325	ko00330//Arginine and proline metabolism	Amino acid metabolism	Metabolism
pmb0498	337.2	207.5	N-Sinapoyl agmatine	Phenolamides	Positive	2.98	336.2	[M+H]+	119000	170000	125000	343000	230000	251000	136000	101000	213000	244000	234000	154000	75800	164000	138000	-
pmb0501	131.1	72.1	Agmatine	Phenolamides	Positive	0.64	130.1	[M+H]+	267000	312000	323000	378000	393000	259000	517000	335000	493000	391000	362000	338000	216000	288000	265000	C00179	C00179	ko01100//Metabolic pathways;ko00330//Arginine and proline metabolism	Amino acid metabolism;Global and Overview	Metabolism
pmb0505	235.1	147.4	N'-p-Coumaroyl putrescine	Phenolamides	Positive	2.27	234.1	[M+H]+	500000	798000	787000	676000	688000	509000	983000	1340000	691000	799000	764000	744000	798000	550000	617000	-
pmb0514	348.1	136.4	Adenosine 3'-monophosphate	Nucleotide and its derivates	Positive	0.85	347.1	[M+H]+	206000	466000	461000	325000	989000	191000	434000	292000	309000	519000	257000	455000	783000	255000	653000	C01367	C01367	ko00230//Purine metabolism	Nucleotide metabolism	Metabolism
pmb0532	349.1	137.4	Inosine 5'-monophosphate	Nucleotide and its derivates	Positive	1.13	348.1	[M+H]+	60700	142000	127000	79400	147000	67300	195000	147000	159000	139000	77400	112000	243000	141000	232000	C00130	C00130	ko01100//Metabolic pathways;ko01110//Biosynthesis of secondary metabolites;ko01130//Biosynthesis of antibiotics;ko00230//Purine metabolism	Nucleotide metabolism;Global and Overview	Metabolism
pmb0565	509.1	347.7	Syringetin 3-O-hexoside	Flavonol	Positive	3.36	508.1	[M+H]+	298000	370000	411000	239000	294000	306000	360000	244000	282000	300000	330000	176000	282000	346000	316000	-
pmb0588	611.1	449.4	Luteolin 3',7-di-O-glucoside	Flavone	Positive	3.38	610.1	[M+H]+	649000	845000	851000	1020000	1420000	490000	1470000	1510000	1170000	443000	602000	393000	388000	272000	384000	-
pmb0595	479.2	317.8	Isorhamnetin 5-O-hexoside	Flavonol	Positive	4	478.2	[M+H]+	6680000	6490000	6330000	1650000	1380000	1680000	5520000	31400000	15700000	232000	128000	443000	555000	295000	426000	-
pmb0604	449.1	287.6	Kaempferol 3-O-glucoside (Astragalin)	Flavonol	Positive	4.05	448.1	[M+H]+	1070000	964000	1040000	506000	671000	507000	904000	336000	504000	283000	341000	254000	172000	145000	92300	C12249	C12249	ko01110//Biosynthesis of secondary metabolites;ko00944//Flavone and flavonol biosynthesis	Global and Overview;Biosynthesis of other secondary metabolites	Metabolism
pmb0605	433.1	271.7	Apigenin 7-O-glucoside (Cosmosiin)	Flavone	Positive	4.15	432.1	[M+H]+	919000	756000	690000	1120000	1120000	910000	1140000	693000	780000	527000	423000	426000	195000	218000	196000	C04608	C04608	ko00944//Flavone and flavonol biosynthesis	Biosynthesis of other secondary metabolites	Metabolism
pmb0607	463.2	287.7	Chrysoeriol 7-O-hexoside	Flavone	Positive	4.25	462.2	[M+H]+	1820000	1950000	1590000	1460000	1460000	859000	1680000	1940000	1870000	1160000	1160000	1170000	1150000	1460000	1350000	-
pmb0615	789.1	789.1	Hesperetin C-hexosyl-O-hexosyl-O-hexoside	Flavone C-glycosides	Positive	2.63	788.1	[M+H]+	1320000	3090000	2910000	2930000	3330000	1510000	3500000	3350000	4320000	1790000	1510000	1770000	2340000	2710000	2720000	-
pmb0618	627.1	430	8-C-hexosyl-hesperetin O-hexoside	Flavone C-glycosides	Positive	2.76	626.1	[M+H]+	1960000	3410000	3590000	2380000	2050000	1910000	2610000	3070000	3150000	3170000	4170000	1970000	3930000	4640000	4450000	-
pmb0619	775.1	774.9	Eriodictiol 6-C-hexoside 8-C-hexoside-O-hexoside	Flavone C-glycosides	Positive	2.58	774.1	[M+H]+	18500000	40300000	40600000	46100000	44900000	38300000	44300000	40300000	52600000	33600000	35400000	19800000	25600000	35200000	25500000	-
pmb0624	611.1	329	6-C-hexosyl-luteolin O-hexoside	Flavone C-glycosides	Positive	3.05	610.1	[M+H]+	842000	1490000	1390000	903000	979000	1150000	1290000	1020000	1370000	1820000	1450000	979000	1660000	1430000	1690000	-
pmb0628	613.1	300.3	Eriodictiol C-hexosyl-O-hexoside	Flavone C-glycosides	Positive	3.04	612.1	[M+H]+	1300000	2430000	2310000	2660000	2680000	3000000	3030000	2570000	2770000	1940000	3000000	1530000	1210000	1630000	1790000	-
pmb0644	449.1	329.6	Luteolin C-hexoside	Flavone C-glycosides	Positive	3.42	448.1	[M+H]+	83100	39500	85700	44500	179000	57700	86700	151000	105000	9	9	9	9	9	9	-
pmb0645	627.1	447.3	6-C-hexosyl-hesperetin O-hexoside	Flavone C-glycosides	Positive	3.37	626.1	[M+H]+	598000	908000	752000	1160000	1530000	714000	1370000	2180000	1460000	9	455000	378000	9	572000	717000	-
pmb0660	757.2	757	C-hexosyl-luteolin O-p-coumaroylhexoside	Flavone C-glycosides	Positive	3.69	756.2	[M+H]+	1060000	1300000	1000000	1030000	2050000	1090000	1190000	4350000	2070000	148000	114000	156000	131000	56300	9	-
pmb0661	609.1	463.4	Chrysoeriol C-hexosyl-O-rhamnoside	Flavone C-glycosides	Positive	3.78	608.1	[M+H]+	25700	51700	41600	5730	9	9	372000	19200	37200	9	9	9	9	9	9	-
pmb0711	611.2	303.7	Quercetin 7-O-rutinoside	Flavonol	Positive	3.64	610.2	[M+H]+	79800	111000	81500	99400	86600	75500	107000	105000	82700	59800	60300	67100	86100	9	54000	-
pmb0749	369.1	177.5	O-Feruloyl quinic acid	Quinate and its derivatives	Positive	2.25	368.1	[M+H]+	69600	157000	176000	125000	138000	101000	135000	113000	94300	208000	191000	220000	298000	206000	250000	-
pmb0751	321.1	147.5	5-O-p-Coumaroyl shikimic acid	Quinate and its derivatives	Positive	3.78	320.1	[M+H]+	560000	473000	438000	653000	528000	783000	443000	299000	499000	260000	450000	235000	129000	264000	144000	-
pmb0752	369.1	177.5	3-O-Feruloyl quinic acid	Quinate and its derivatives	Positive	2.99	368.1	[M+H]+	4570000	7430000	7890000	4460000	3570000	4750000	3230000	2800000	4050000	12200000	12500000	7520000	8850000	10600000	9670000	C02572
pmb0764	144.1	142.9	4-Methyl-5-thiazoleethanol	Others	Positive	2.62	143.1	[M+H]+	154000	185000	202000	158000	132000	170000	250000	101000	246000	225000	289000	229000	107000	182000	177000	C04294	C04294	ko01100//Metabolic pathways;ko00730//Thiamine metabolism	Metabolism of cofactors and vitamins;Global and Overview	Metabolism
pmb0776	337.1	177.5	N-Feruloyl tryptamine	Tryptamine derivatives	Positive	2.73	336.1	[M+H]+	201000	318000	270000	275000	306000	329000	327000	288000	427000	299000	276000	245000	221000	281000	200000	-
pmb0782	86.1	56	Piperidine	Alkaloids	Positive	1.16	85.1	[M+H]+	7310000	9320000	9640000	12300000	10700000	13300000	9510000	9430000	7820000	7360000	10100000	10400000	6930000	9560000	7100000	C01746	C01746	ko00960//Tropane, piperidine and pyridine alkaloid biosynthesis	Biosynthesis of other secondary metabolites	Metabolism
pmb0789	332.1	314.7	Pyridoxine O-glucoside	Vitamins	Positive	1.14	331.1	[M+H]+	452000	985000	1110000	923000	975000	953000	1370000	1190000	1020000	919000	844000	897000	954000	868000	749000	-
pmb0800	123.1	80.3	Niacinamide	Vitamins	Positive	1.49	122.1	[M+H]+	5730000	8330000	8380000	7320000	6650000	6020000	8560000	10500000	7550000	8890000	8210000	6540000	5620000	6660000	7360000	C00153	C00153	ko01100//Metabolic pathways;ko00760//Nicotinate and nicotinamide metabolism	Metabolism of cofactors and vitamins;Global and Overview	Metabolism
pmb0801	346	184.5	4-Pyridoxic acid O-hexoside	Vitamins	Positive	1.57	345	[M+H]+	2400000	4120000	4260000	3100000	2710000	2350000	4740000	5130000	5100000	3320000	2460000	3480000	5790000	4320000	3300000	-
pmb0802	220.2	202.7	D-Pantothenic acid	Vitamins	Positive	2.28	219.2	[M+H]+	4650000	6450000	6350000	5960000	5300000	6350000	7670000	6010000	6760000	6500000	6200000	6120000	6060000	5760000	6160000	C00864	C00864	ko01100//Metabolic pathways;ko01110//Biosynthesis of secondary metabolites;ko00410//betaAlanine metabolism;ko00770//Pantothenate and CoA biosynthesis	Metabolism of cofactors and vitamins;Metabolism of other amino acids;Global and Overview	Metabolism
pmb0803	508.1	152.5	Pyridoxine O-feruloyl hexoside	Vitamins	Positive	3.15	507.1	[M+H]+	123000	232000	176000	276000	288000	384000	189000	113000	85700	311000	204000	138000	115000	169000	9	-
pmb0808	353.1	272.8	6,7-dihydroxycoumarin 6-O-quinic acid	Coumarins	Positive	2.81	352.1	[M+H]+	871000	1270000	1300000	800000	438000	706000	532000	423000	377000	1890000	1290000	1510000	1440000	1440000	1350000	-
pmb0818	206.1	147.5	Methoxyindoleacetic acid	Indole derivatives	Positive	2.48	205.1	[M+H]+	3350000	4250000	4710000	7490000	8650000	6910000	3460000	3420000	2910000	2460000	5270000	3740000	4420000	4110000	4090000	C05660	C05660	ko00380//Tryptophan metabolism	Amino acid metabolism	Metabolism
pmb0819	157	130.4	3-Indoleacetonitrile	Indole derivatives	Positive	2.45	156	[M+H]+	104000	116000	96100	132000	147000	172000	95100	52100	46900	52200	134000	87400	108000	90000	79300	C02938	C02938	ko00380//Tryptophan metabolism	Amino acid metabolism	Metabolism
pmb0824	537.1	177.5	Syringic acid O-feruloyl-O-hexoside	Benzoic acid derivatives	Positive	2.54	536.1	[M+H]+	274000	662000	687000	259000	401000	452000	769000	438000	377000	802000	516000	507000	1090000	859000	1210000	-
pmb0829	98.9	81.1	Phosphoric acid	Organic acids	Positive	0.89	97.9	[M+H]+	2580000	2840000	2430000	3660000	5460000	2740000	2060000	1910000	2170000	2610000	3000000	2190000	2680000	3400000	2830000	C00009	C00009	ko01100//Metabolic pathways;ko02010//ABC transporters;ko00190//Oxidative phosphorylation;ko00195//Photosynthesis	Energy metabolism;Membrane transport;Global and Overview	Metabolism;Environmental Information Processing
pmb0835	611.2	611.1	Gallocatechin-gallocatechin	Catechin derivatives	Positive	2.38	610.2	[M+H]+	5910000	10400000	10700000	11200000	11800000	8300000	13100000	11600000	15000000	8110000	6740000	6340000	10500000	8950000	5680000	-
pmb0848	494.3	184.6	LysoPC 16:1 (2n isomer)	Lipids_Glycerophospholipids	Positive	7.82	493.3	[M+H]+	698000	584000	547000	613000	387000	425000	498000	670000	779000	473000	776000	560000	794000	817000	609000	-
pmb0852	520.3	502.3	LysoPC 18:2	Lipids_Glycerophospholipids	Positive	8.36	519.3	[M+H]+	12200000	9230000	8810000	6690000	5670000	6420000	8580000	8310000	9700000	7520000	8480000	8400000	16300000	18100000	16600000	-
pmb0855	496.3	478.3	LysoPC 16:0	Lipids_Glycerophospholipids	Positive	8.74	495.3	[M+H]+	10200000	6440000	5530000	5420000	4840000	5320000	7580000	7260000	7880000	10300000	9870000	10500000	14900000	14500000	17800000	-
pmb0859	522.4	184.5	LysoPC 18:1 (2n isomer)	Lipids_Glycerophospholipids	Positive	8.86	521.4	[M+H]+	15100000	12000000	10900000	17600000	12900000	20200000	7780000	9700000	11900000	14200000	16000000	12900000	15100000	16100000	14500000	-
pmb0863	492.3	184.5	LysoPC 16:2 (2n isomer)	Lipids_Glycerophospholipids	Positive	7.29	491.3	[M+H]+	321000	267000	259000	271000	191000	225000	262000	376000	359000	209000	307000	212000	349000	334000	312000	-
pmb0864	426.3	285.8	LysoPE 14:0	Lipids_Glycerophospholipids	Positive	7.63	425.3	[M+H]+	52800	32800	28800	35700	23000	30500	28700	50500	39400	47000	48300	39900	91400	77900	97700	-
pmb0865	518.2	500.3	LysoPC 18:3 (2n isomer)	Lipids_Glycerophospholipids	Positive	7.67	517.2	[M+H]+	13900000	11200000	10300000	9030000	7220000	8070000	10600000	13700000	16600000	8570000	9350000	8510000	17300000	17200000	15100000	-
pmb0866	468.1	450.5	LysoPC 14:0	Lipids_Glycerophospholipids	Positive	7.68	467.1	[M+H]+	103000	98000	90600	105000	53600	62900	75600	86700	95800	76200	119000	89400	135000	129000	138000	-
pmb0873	520	125	LysoPC 18:2 (2n isomer)	Lipids_Glycerophospholipids	Positive	8.19	519	[M+H]+	3150000	2350000	2140000	2250000	1750000	1910000	2070000	3120000	3150000	2060000	2170000	2040000	3500000	3880000	3020000	-
pmb0874	478.6	337.9	LysoPE 18:2 (2n isomer)	Lipids_Glycerophospholipids	Positive	8.32	477.6	[M+H]+	8380000	5690000	5140000	3670000	3530000	3880000	2780000	6250000	3690000	6470000	6910000	7200000	16100000	14200000	16800000	-
pmb0882	522.1	125.5	LysoPC 18:1	Lipids_Glycerophospholipids	Positive	9.04	521.1	[M+H]+	2650000	1840000	1560000	1740000	1360000	1920000	1230000	1270000	1670000	2120000	1890000	2120000	3250000	3370000	3450000	-
pmb0885	291	273.9	4-oxo-9Z,11Z,13E,15E-octadecatetraenoic acid	Lipids_Fatty acids	Positive	6.65	290	[M+H]+	477000	398000	409000	512000	414000	410000	368000	406000	381000	375000	393000	353000	290000	271000	346000	-
pmb0889	279.3	201.5	Punicic acid	Lipids_Fatty acids	Positive	8.91	278.3	[M+H]+	667000	528000	431000	583000	457000	476000	457000	626000	753000	492000	554000	602000	382000	423000	439000	C08364
pmb0890	355.1	337.9	MAG (18:2)	Lipids_Glycerolipids	Positive	10.45	354.1	[M+H]+	24700000	14700000	10200000	16700000	13700000	11400000	20400000	20200000	25300000	16500000	15900000	12800000	11800000	17200000	13000000	-
pmb0896	265.1	177.5	N'-Feruloyl putrescine	Phenolamides	Positive	2.44	264.1	[M+H]+	17800000	36900000	43200000	33700000	38600000	43100000	32500000	43700000	28900000	32600000	33500000	44800000	48400000	30900000	36000000	-
pmb0907	265.1	177.5	N-Feruloyl putrescine	Phenolamides	Positive	2.44	264.1	[M+H]+	975000	1950000	2460000	1740000	1880000	1910000	1640000	2010000	1560000	1630000	1610000	2100000	2480000	1540000	1910000	C10497	C10497	ko00330//Arginine and proline metabolism	Amino acid metabolism	Metabolism
pmb0962	235.1	118.4	Lysine butyrate	Amino acid derivatives	Positive	0.77	234.1	[M+H]+	87600	45700	71700	99600	77400	64000	63400	71700	65100	66100	55200	76900	55900	122000	44800	-
pmb0964	366.2	203.5	iP7G	Nucleotide and its derivates	Positive	0.81	365.2	[M+H]+	2210000	4540000	3820000	3440000	4100000	3340000	4180000	3340000	2690000	2210000	4570000	3360000	4930000	4490000	4830000	-
pmb0981	348.2	136.4	Adenosine 5'-monophosphate	Nucleotide and its derivates	Positive	1.14	347.2	[M+H]+	501000	1070000	1070000	932000	1750000	470000	1120000	490000	896000	1130000	524000	959000	1590000	663000	1840000	C00020	C00020	ko01100//Metabolic pathways;ko01110//Biosynthesis of secondary metabolites;ko01130//Biosynthesis of antibiotics;ko00230//Purine metabolism;ko00908//Zeatin biosynthesis	Nucleotide metabolism;Global and Overview;Metabolism of terpenoids and polyketides	Metabolism
pmb1096	118	58.2	Indole	Indole derivatives	Positive	2.47	117	[M+H]+	4480000	6850000	7330000	10100000	11400000	10700000	5750000	5330000	5160000	3910000	8270000	5910000	7060000	6630000	6210000	C00463	C00463	ko01100//Metabolic pathways;ko01110//Biosynthesis of secondary metabolites;ko00380//Tryptophan metabolism;ko00400//Phenylalanine, tyrosine and tryptophan biosynthesis;ko00402//Benzoxazinoid biosynthesis	Global and Overview;Amino acid metabolism;Biosynthesis of other secondary metabolites	Metabolism
pmb1108	773.1	653.6	Luteolin 6-C-hexoside 8-C-hexosyl-O-hexoside	Flavone C-glycosides	Positive	2.58	772.1	[M+H]+	61400	138000	146000	141000	95200	123000	111000	120000	168000	142000	156000	101000	125000	152000	94000	-
pmb1178	339.1	177.5	O-Feruloyl 2-hydroxylcoumarin	Coumarins	Positive	3.21	338.1	[M+H]+	397000	764000	834000	1150000	1240000	957000	1110000	707000	1240000	462000	431000	360000	248000	279000	406000	-
pmb1207	339.1	177.5	O-Feruloyl 3-hydroxylcoumarin	Coumarins	Positive	3.37	338.1	[M+H]+	260000	255000	232000	337000	441000	329000	348000	331000	325000	9	217000	143000	116000	128000	9	-
pmb1240	503.2	311.8	Phellodensin F	Others	Positive	3.74	502.2	[M+H]+	727000	790000	808000	744000	791000	708000	800000	631000	686000	406000	471000	415000	690000	609000	475000	-
pmb1318	457.2	191.5	8-Methyl-2-oxo-4-phenyl-2H-chromen-7-yl 4-(hexyloxy)benzoate	Benzoic acid derivatives	Positive	4.51	456.2	[M+H]+	25100000	22000000	22500000	24100000	24200000	20300000	21300000	17400000	12500000	20300000	17000000	17900000	19800000	19400000	22800000	-
pmb1530	317.1	299.9	Phytocassane D	Terpenoids	Positive	7.28	316.1	[M+H]+	416000	353000	324000	464000	374000	383000	320000	370000	331000	318000	377000	303000	300000	243000	324000	-
pmb1562	351	259.9	MAG (18:4) isomer3	Lipids_Glycerolipids	Positive	7.75	350	[M+H]+	436000	351000	322000	348000	239000	282000	373000	326000	481000	324000	296000	297000	306000	329000	328000	-
pmb1587	207.2	165.5	4-Hydroxy-3,5-diisopropylbenzaldehyde	Benzoic acid derivatives	Positive	8.33	206.2	[M+H]+	27900	30800	35100	29300	17600	34800	26800	26900	27700	9	24200	12400	26500	21500	9	-
pmb1605	353.3	335.8	MAG (18:3) isomer3	Lipids_Glycerolipids	Positive	8.55	352.3	[M+H]+	4570000	2960000	2360000	3640000	2670000	3570000	3480000	3950000	3780000	5040000	3110000	3270000	1930000	1880000	2710000	-
pmb1626	534.4	262.9	MGMG (18:2) isomer1	Lipids_Glycerolipids	Positive	9.15	533.4	[M+H]+	216000	155000	90300	223000	178000	204000	128000	180000	116000	234000	103000	185000	90200	83100	141000	-
pmb1650	279.2	149.4	Octadeca-11E,13E,15Z-trienoic acid	Lipids_Fatty acids	Positive	9.64	278.2	[M+H]+	2480000	2180000	1830000	3550000	2840000	2400000	2540000	2160000	2180000	1750000	1970000	1750000	2630000	1690000	1320000	-
pmb1652	149	121.3	Phthalic anhydride	Others	Positive	9.64	148	[M+H]+	9150000	7640000	6520000	13500000	10400000	8780000	8910000	7940000	7650000	6230000	7330000	6660000	10200000	6140000	4550000	-
pmb1656	353.1	173.7	MAG (18:3) isomer4	Lipids_Glycerolipids	Positive	9.85	352.1	[M+H]+	4050000	2560000	1810000	2570000	2330000	2120000	3600000	3260000	4060000	2890000	2170000	2230000	2260000	2950000	2540000	-
pmb1754	184	83.2	O-Phosphocholine	Cholines	Positive	0.78	183	[M+H]+	905000	687000	532000	1070000	984000	871000	772000	629000	642000	628000	617000	669000	588000	560000	650000	C00588	C00588	ko01100//Metabolic pathways;ko00564//Glycerophospholipid metabolism	Global and Overview;Lipid metabolism	Metabolism
pmb1912	474.2	327.8	10-Formyl-THF	Others	Positive	2.42	473.2	[M+H]+	15200000	28700000	25000000	17900000	13600000	12800000	11800000	10600000	8400000	33300000	47600000	34200000	43300000	45800000	35100000	C00234	C00234	ko01100//Metabolic pathways;ko01120//Microbial metabolism in diverse environments;ko00970//AminoacyltRNA biosynthesis;ko01200//Carbon metabolism;ko00670//One carbon pool by folate	Global and Overview;Translation;Metabolism of cofactors and vitamins	Genetic Information Processing;Metabolism
pmb2211	343.1	240.9	Cocamidopropyl betaine	Others	Positive	6.53	342.1	[M+H]+	1250000	971000	968000	962000	762000	1110000	1990000	1230000	1290000	1460000	1680000	1190000	1440000	1300000	1460000	-
pmb2251	694.1	335.8	DGMG (18:1)	Lipids_Glycerolipids	Positive	7.53	693.1	[M+H]+	2430000	1820000	1710000	1500000	1180000	1590000	2410000	5490000	1650000	3260000	1920000	1690000	1300000	1530000	2200000	-
pmb2260	480.1	184.5	LysoPC 15:1	Lipids_Glycerophospholipids	Positive	7.66	479.1	[M+H]+	90900	69400	71700	30800	30200	38400	136000	88500	106000	37500	49500	46300	109000	104000	122000	-
pmb2319	482.3	184.5	LysoPC 15:0	Lipids_Glycerophospholipids	Positive	8.2	481.3	[M+H]+	713000	597000	471000	410000	327000	397000	615000	534000	635000	537000	596000	585000	890000	957000	952000	-
pmb2325	353.1	261.8	MAG (18:3) isomer2	Lipids_Glycerolipids	Positive	8.33	352.1	[M+H]+	968000	578000	483000	675000	613000	706000	799000	1530000	556000	1120000	779000	672000	223000	311000	453000	-
pmb2388	524.1	507.4	LysoPC 18:0 (2n isomer)	Lipids_Glycerophospholipids	Positive	8.84	523.1	[M+H]+	186000	130000	101000	188000	136000	226000	105000	120000	134000	127000	181000	134000	149000	193000	155000	-
pmb2406	510.1	510.4	LysoPC 17:0	Lipids_Glycerophospholipids	Positive	9.29	509.1	[M+H]+	2650000	1670000	1310000	1700000	1340000	2160000	1550000	1640000	2370000	2870000	1940000	2220000	2900000	3420000	4200000	-
pmb2444	353.2	261.8	MAG (18:3) isomer1	Lipids_Glycerolipids	Positive	10	352.2	[M+H]+	6110000	4100000	3050000	3470000	3290000	3380000	4400000	4070000	4840000	3940000	3420000	4220000	3680000	3750000	4410000	-
pmb2554	529.1	355.9	5-O-Feruloyl quinic acid glucoside	Quinate and its derivatives	Negative	2.23	530.1	[M-H]-	180000	206000	231000	204000	181000	127000	141000	163000	87300	237000	236000	304000	368000	312000	314000	-
pmb2556	345.1	167.2	Syringaldehyde O-glucoside	Others	Negative	2.35	346.1	[M-H]-	28100	30800	29800	16700	23700	30900	29600	24700	24300	30500	26600	25500	37200	17900	27000	-
pmb2591	245	203.2	Acetyl tryptophan	Amino acid derivatives	Negative	3.83	246	[M-H]-	307000	416000	419000	343000	382000	285000	312000	1430000	641000	109000	128000	139000	181000	145000	130000	C03137
pmb2601	307.1	161.2	7-hydroxycoumarin-beta-rhamnoside	Coumarins	Negative	4.33	308.1	[M-H]-	81600	96700	98900	89800	112000	91800	87300	113000	73700	77400	75000	90500	112000	87900	74100	-
pmb2620	207.1	192.1	3,4-Dimethoxycinnamic acid	Hydroxycinnamoyl derivatives	Negative	5.49	208.1	[M-H]-	2080000	2400000	2440000	1140000	1220000	1430000	1480000	881000	1650000	1820000	1080000	886000	1050000	1440000	1280000	-
pmb2636	335.1	253.3	8,15-DiHETE	Lipids_Fatty acids	Negative	6.89	336.1	[M-H]-	26400	27100	27100	34400	22300	26900	28100	22000	19900	22300	29400	21800	20300	15300	22000	-
pmb2640	199	181.3	Lauric acid (C12:0)	Lipids_Fatty acids	Negative	9.62	200	[M-H]-	39000	37500	32900	41500	41800	34700	38700	30300	38300	39300	41100	35300	35400	45600	29600	C02679	C02679	ko01100//Metabolic pathways;ko00061//Fatty acid biosynthesis	Global and Overview;Lipid metabolism	Metabolism
pmb2643	225	207.2	Myristoleic acid (C14:1)	Lipids_Fatty acids	Negative	10	226	[M-H]-	11100	11300	8690	17500	14600	18500	13900	15100	18600	16800	13200	12400	7600	10500	12900	C08322
pmb2653	649.1	503.3	D(+)-Melezitose O-rhamnoside	Carbohydrates	Negative	0.74	650.1	[M-H]-	24300	31400	27000	19600	23100	24700	15300	27800	27700	23700	23300	26800	24600	45100	24500	-
pmb2654	460.1	118.2	Anthranilate O-hexosyl-O-hexoside	Benzoic acid derivatives	Negative	0.74	461.1	[M-H]-	1030000	1250000	1170000	770000	186000	640000	2010000	1290000	2230000	598000	1270000	897000	416000	1660000	567000	-
pmb2657	289.1	191.2	Argininosuccinate	Organic acids	Negative	0.69	290.1	[M-H]-	155000	169000	162000	55800	73600	61900	131000	113000	190000	480000	68000	64600	253000	272000	283000	C03406	C03406	ko01100//Metabolic pathways;ko01110//Biosynthesis of secondary metabolites;ko01130//Biosynthesis of antibiotics;ko01230//Biosynthesis of amino acids;ko00250//Alanine, aspartate and glutamate metabolism;ko00220//Arginine biosynthesis	Global and Overview;Amino acid metabolism	Metabolism
pmb2778	295	183.3	9,10-EODE	Lipids_Fatty acids	Negative	8.92	296	[M-H]-	394000	387000	328000	367000	314000	323000	298000	437000	516000	363000	383000	400000	268000	336000	299000	-
pmb2784	293.2	275.6	13-HOTrE	Lipids_Fatty acids	Negative	10.15	294.2	[M-H]-	2610	2610	1180	2560	5000	2600	2750	1420	1950	3060	2030	1380	1130	1010	950	-
pmb2786	293	275.4	9-HOTrE	Lipids_Fatty acids	Negative	8.37	294	[M-H]-	117000	130000	105000	155000	122000	125000	108000	118000	191000	134000	143000	118000	78800	90800	69000	-
pmb2787	293.2	249.9	9-KODE	Lipids_Fatty acids	Negative	9.12	294.2	[M-H]-	46700	50900	41200	40700	40700	42700	32900	43600	63500	64100	59400	36000	29700	53000	36400	-	C14766	ko00591//Linoleic acid metabolism	Lipid metabolism	Metabolism
pmb2791	309.1	291.4	9-HpOTrE	Lipids_Fatty acids	Negative	7.5	310.1	[M-H]-	108000	119000	116000	79700	46400	53400	62500	82500	119000	48100	56800	45500	52000	89100	52500	-
pmb2792	293	193.2	13-HOTrE(r)	Lipids_Fatty acids	Negative	7.77	294	[M-H]-	82400	96900	91100	117000	77100	93900	128000	149000	270000	126000	88300	85800	105000	161000	104000	-
pmb2795	177	145.2	4-Methoxycinnamic acid	Hydroxycinnamoyl derivatives	Negative	5.43	178	[M-H]-	276000	306000	301000	139000	125000	167000	115000	172000	152000	114000	112000	114000	96500	124000	111000	-
pmb2799	295	277.5	12,13-EODE	Lipids_Fatty acids	Negative	9.7	296	[M-H]-	4740	3730	4650	5890	2100	5400	2780	4510	5480	4620	6370	4400	4520	5220	4820	-
pmb2804	311.1	293.4	13-HPODE	Lipids_Fatty acids	Negative	7.82	312.1	[M-H]-	8270	8640	7470	9900	8780	10900	7270	11100	12100	8120	12200	12700	5780	7450	6990	C04717	C04717	ko01100//Metabolic pathways;ko00591//Linoleic acid metabolism	Lipid metabolism;Global and Overview	Metabolism
pmb2826	147	85	Citramalate	Organic acids	Negative	0.92	148	[M-H]-	432000	614000	502000	584000	488000	573000	834000	420000	645000	371000	623000	384000	437000	572000	512000	C00815
pmb2831	315.1	153.2	Protocatechuic acid O-glucoside	Catechin derivatives	Negative	2.53	316.1	[M-H]-	4820000	4930000	5920000	5790000	5570000	3810000	4820000	6900000	3080000	4720000	6050000	6850000	6870000	5540000	6420000	-
pmb2833	529	329.3	3-O-Feruloyl quinic acid glucoside	Quinate and its derivatives	Negative	2.23	530	[M-H]-	142000	143000	180000	143000	137000	94000	106000	112000	73100	200000	168000	239000	289000	252000	237000	-
pmb2835	181.1	151.1	Syringaldehyde	Hydroxycinnamoyl derivatives	Negative	4.02	182.1	[M-H]-	425000	475000	514000	138000	139000	213000	212000	281000	312000	291000	254000	308000	287000	338000	270000	-
pmb2850	329	314.2	Tricin	Flavone	Negative	5.68	330	[M-H]-	9	9	9	9	9	9	9	9	9	9	6680	9	9	9	2070	-
pmb2855	307	145.2	L-Glutamine O-hexside	Amino acid derivatives	Negative	0.73	308	[M-H]-	45500	54100	55400	74100	40200	57600	18300	68000	59000	99400	58400	48500	63200	61600	78800	-
pmb2858	665.1	485.3	Maltotetraose	Carbohydrates	Negative	0.77	666.1	[M-H]-	11400	25500	18000	5100	2120	3850	34400	31500	28300	6180	14000	6740	24500	19900	21300	C02052
pmb2867	350.1	144.2	Kynurenic acid O-hexside	Organic acids	Negative	1.78	351.1	[M-H]-	12400	23800	20100	27700	16200	15600	12800	14900	16300	8870	9360	9	14400	14800	20300	-
pmb2871	315.1	152.1	2,5-dihydroxy benzoic acid O-hexside	Benzoic acid derivatives	Negative	1.9	316.1	[M-H]-	32400000	25500000	34900000	32000000	28300000	30400000	37800000	27000000	17900000	19800000	41600000	41200000	32800000	31100000	28400000	-
pmb2873	214.1	134.2	3-(2-Naphthyl)-D-alanine	Amino acid derivatives	Negative	3.69	215.1	[M-H]-	968000	1060000	1050000	809000	845000	787000	963000	1470000	1010000	697000	1080000	851000	959000	814000	1030000	-
pmb2922	565.1	323.3	Uridine 5'-diphospho-D-glucose	Nucleotide and its derivates	Negative	1.12	566.1	[M-H]-	1280000	1380000	1270000	1630000	1610000	1620000	1460000	1120000	1790000	1050000	907000	1120000	1210000	1730000	1520000	C00029	C00029	ko01100//Metabolic pathways;ko01130//Biosynthesis of antibiotics;ko00240//Pyrimidine metabolism;ko00052//Galactose metabolism;ko00500//Starch and sucrose metabolism;ko00908//Zeatin biosynthesis;ko00053//Ascorbate and aldarate metabolism;ko00040//Pentose and glucuronate interconversions;ko00520//Amino sugar and nucleotide sugar metabolism;ko00561//Glycerolipid metabolism	Lipid metabolism;Carbohydrate metabolism;Global and Overview;Metabolism of terpenoids and polyketides;Nucleotide metabolism	Metabolism
pmb2928	331	313.7	Gallic acid O-Hexoside	Benzoic acid derivatives	Negative	2.09	332	[M-H]-	13400	17500	18800	14600	14300	10800	16900	18500	19700	15200	22400	20300	20400	21900	17400	-
pmb2936	591.1	367.4	Disinapoyl hexoside	Hydroxycinnamoyl derivatives	Negative	4.88	592.1	[M-H]-	48800	66700	115000	45500	101000	138000	785	20100	32800	130000	196000	109000	109000	185000	155000	-
pmb2940	385.1	223.2	1-O-beta-D-Glucopyranosyl sinapate	Hydroxycinnamoyl derivatives	Negative	3.15	386.1	[M-H]-	2430000	2370000	2610000	1200000	1730000	1460000	1280000	883000	1440000	2770000	3510000	2940000	4490000	4580000	4880000	-
pmb2954	771.1	609.5	Luteolin O-hexosyl-O-hexosyl-O-hexoside	Flavone	Negative	2.53	772.1	[M-H]-	1420000	1500000	1620000	2050000	2870000	1460000	2130000	2040000	1970000	887000	956000	1150000	610000	774000	755000	-
pmb2957	465.1	285.3	Cyanidin O-syringic acid	Anthocyanins	Negative	2.5	466.1	[M-H]-	3120000	3250000	3120000	3180000	2580000	3430000	2880000	1750000	4380000	2420000	2880000	2840000	3400000	4920000	3090000	-
pmb2959	489.1	285.3	Cyanidin O-acetylhexoside	Anthocyanins	Negative	2.89	490.1	[M-H]-	682000	715000	735000	895000	1020000	933000	938000	825000	1000000	553000	686000	590000	406000	647000	519000	-
pmb2970	625.2	463.3	Hesperetin O-hexosyl-O-hexoside	Flavanone	Negative	2.29	626.2	[M-H]-	22300	27500	25900	21200	22900	17700	23200	31900	21800	21200	23000	31100	33700	31300	33800	-
pmb2979	549.2	387.3	Hesperetin O-malonylhexoside	Flavanone	Negative	3.99	550.2	[M-H]-	324000	335000	394000	204000	199000	340000	451000	402000	620000	335000	380000	263000	263000	356000	257000	-
pmb2984	491.1	287.3	Acetyl-eriodictyol O-hexoside	Flavone	Negative	5.16	492.1	[M-H]-	9950	9100	10500	11900	15800	11300	18300	13000	11200	6760	15700	14400	9150	10800	13100	-
pmb3013	519.1	315.3	Isorhamnetin O-acetyl-hexoside	Flavonol	Negative	4.28	520.1	[M-H]-	15900	20300	19800	9	9	13500	32100	136000	40200	9	9	9	9	9	9	-
pmb3023	449.1	329.3	Eriodictyol C-hexoside	Flavone C-glycosides	Negative	3.3	450.1	[M-H]-	658000	734000	716000	528000	706000	663000	927000	695000	873000	690000	557000	510000	601000	727000	602000	-
pmb3041	521.1	329.3	Tricin O-saccharic acid	Flavone	Negative	3.74	522.1	[M-H]-	641000	869000	934000	756000	741000	710000	1200000	860000	1740000	537000	533000	446000	575000	460000	522000	-
pmb3042	491.1	329.3	Tricin 5-O-hexoside	Flavone	Negative	3.94	492.1	[M-H]-	73600	94400	139000	117000	170000	150000	94200	43900	156000	105000	85700	53700	41300	49500	81900	-
pmb3044	653.1	593.4	Tricin di-O-hexoside	Flavone	Negative	4.08	654.1	[M-H]-	38400	34200	47500	40000	54300	47200	43900	25400	43400	36800	32900	25800	27400	31000	32000	-
pmb3055	513.1	191.2	p-Coumaroyl quinic acid O-glucuronic acid	Quinate and its derivatives	Negative	1.82	514.1	[M-H]-	9	9	9	9	9	42300	14100	23500	17200	9	13500	10900	15800	17300	11800	-
pmb3056	355.1	181.2	Homovanilloyl quinic acid	Quinate and its derivatives	Negative	1.93	356.1	[M-H]-	1480000	1920000	1900000	2080000	2060000	2520000	1260000	1750000	1490000	2180000	1550000	1610000	2240000	1870000	1990000	-
pmb3058	369	191.1	Quinic acid O-glucuronic acid	Quinate and its derivatives	Negative	2.09	370	[M-H]-	360000	451000	358000	317000	324000	300000	398000	344000	194000	345000	326000	382000	360000	303000	395000	-
pmb3059	543.1	191.2	Quinic acid O-di-glucuronic acid	Quinate and its derivatives	Negative	1.99	544.1	[M-H]-	28100	19000	21800	44100	43200	38800	39700	29500	35100	125000	116000	108000	107000	120000	93200	-
pmb3061	499.1	163.2	5-O-p-coumaroyl quinic acid O-hexoside	Quinate and its derivatives	Negative	2.18	500.1	[M-H]-	9350000	10400000	8880000	18900000	21700000	22100000	7280000	10500000	9200000	5540000	6130000	6070000	7160000	6240000	6840000	-
pmb3062	385.1	152.2	Eudesmoyl quinic acid	Quinate and its derivatives	Negative	2.19	386.1	[M-H]-	65000	67100	52300	64300	50800	31900	49700	59900	11600	33300	61700	103000	101000	85700	58300	-
pmb3064	499.2	173.2	3-O-p-coumaroyl quinic acid O-hexoside	Quinate and its derivatives	Negative	2.45	500.2	[M-H]-	8670000	9060000	7640000	14300000	13900000	20300000	5910000	6630000	7650000	6600000	5550000	4780000	4870000	4840000	5000000	-
pmb3066	481.1	445.4	5-O-p-coumaroyl shikimic acid O-hexoside	Quinate and its derivatives	Negative	2.52	482.1	[M-H]-	14100	18000	22700	27900	33600	26000	34300	33600	37200	9	9920	9690	18300	9	9	-
pmb3068	337.1	155.8	1-O-p-Coumaroyl quinic acid	Quinate and its derivatives	Negative	2.84	338.1	[M-H]-	24300000	24700000	27600000	44100000	46600000	46400000	30800000	36200000	29500000	12800000	13400000	14500000	14600000	14100000	13900000	-
pmb3072	481.1	319.3	3-O-p-coumaroyl shikimic acid O-hexoside	Quinate and its derivatives	Negative	3.13	482.1	[M-H]-	528000	650000	659000	465000	736000	563000	745000	808000	698000	435000	487000	438000	635000	601000	839000	-
pmb3073	709.1	401.3	O-p-Coumaroyl quinic acid O-rutinoside derivative	Quinate and its derivatives	Negative	3.43	710.1	[M-H]-	39600	27100	24900	117000	116000	198000	17500	25200	24400	7150	10800	8710	6090	14700	9520	-
pmb3074	337.1	190.9	3-O-p-Coumaroyl quinic acid	Quinate and its derivatives	Negative	3.46	338.1	[M-H]-	21500000	23900000	25400000	38900000	37500000	47400000	19100000	31400000	32900000	11200000	10000000	9140000	7920000	10300000	10500000	-
pmb3075	319	145.3	3-O-p-Coumaroyl shikimic acid	Quinate and its derivatives	Negative	3.97	320	[M-H]-	435000	519000	497000	525000	560000	660000	553000	492000	566000	348000	411000	292000	282000	350000	347000	-
pmb3081	289.1	97	Glucarate O-Phosphoric acid	Carbohydrates	Negative	1.09	290.1	[M-H]-	14000000	14800000	13900000	18100000	20100000	17100000	14200000	20700000	18600000	28500000	19300000	25900000	23400000	15600000	19300000	-
pmb3088	421.1	241.2	Trehalose 6-phosphate	Carbohydrates	Negative	0.69	422.1	[M-H]-	32700	34000	33100	14100	15100	9690	32100	34400	48600	11800	10500	12300	58800	71700	62200	C00689	C00689	ko01100//Metabolic pathways;ko00500//Starch and sucrose metabolism	Carbohydrate metabolism;Global and Overview	Metabolism
pmb3093	351.1	132.6	6,7-dihydroxycoumarin 7-O-quinic acid	Coumarins	Negative	2.44	352.1	[M-H]-	6600000	6320000	5940000	4560000	4690000	4790000	2010000	1500000	928000	10800000	9610000	7090000	8100000	6440000	8630000	-
pmb3094	703.4	351.3	Esculetin O-quinacyl esculetin O-quinic acid	Coumarins	Negative	2.48	704.4	[M-H]-	978000	813000	563000	601000	656000	537000	93500	64100	9	2360000	1330000	781000	1280000	552000	1430000	-
pmb3099	153	78.9	Diethyl phosphate	Organic acids	Negative	1.61	154	[M-H]-	1190000	1380000	1380000	1600000	1600000	2530000	1720000	1280000	2200000	1310000	1060000	1760000	2100000	2080000	1390000	C06608
pmb3101	175.1	131.3	2-Isopropylmalate	Organic acids	Negative	2.74	176.1	[M-H]-	96500	120000	84900	100000	58000	50900	130000	108000	158000	122000	80800	50200	96600	80600	137000	C02504	C02504	ko01100//Metabolic pathways;ko01110//Biosynthesis of secondary metabolites;ko01230//Biosynthesis of amino acids;ko01210//2Oxocarboxylic acid metabolism;ko00290//Valine, leucine and isoleucine biosynthesis;ko00620//Pyruvate metabolism	Global and Overview;Carbohydrate metabolism;Amino acid metabolism	Metabolism
pmb3107	359.1	197.1	Syringic acid O-glucoside	Benzoic acid derivatives	Negative	2.34	360.1	[M-H]-	456000	521000	485000	502000	524000	425000	556000	634000	247000	379000	523000	495000	560000	446000	632000	-
pmb3110	167	152.1	Vanillic acid	Hydroxycinnamoyl derivatives	Negative	3.29	168	[M-H]-	208000	247000	303000	189000	205000	133000	277000	205000	342000	234000	319000	239000	184000	330000	229000	C06672	C06672	ko01120//Microbial metabolism in diverse environments	Global and Overview	Metabolism
pmb3117	452	255.3	LysoPE 16:0	Lipids_Glycerophospholipids	Negative	8.69	453	[M-H]-	6350000	4750000	3360000	4060000	4530000	4410000	3710000	4890000	3860000	7380000	7980000	7290000	13100000	9610000	13200000	-
pmb3121	478.1	281.4	LysoPE 18:1	Lipids_Glycerophospholipids	Negative	8.99	479.1	[M-H]-	1120000	954000	735000	674000	647000	756000	404000	708000	566000	887000	969000	1010000	2390000	2020000	2040000	-
pmb3132	478.1	281.3	LysoPE 18:1 (2n isomer)	Lipids_Glycerophospholipids	Negative	8.81	479.1	[M-H]-	267000	268000	213000	432000	374000	471000	176000	269000	196000	293000	337000	250000	305000	284000	260000	-
pmb3264	611.1	306.2	Glutathione oxidized	Amino acid derivatives	Negative	1.14	612.1	[M-H]-	875000	839000	1080000	696000	1070000	630000	874000	712000	532000	661000	751000	612000	869000	683000	949000	C00127	C00127	ko00480//Glutathione metabolism	Metabolism of other amino acids	Metabolism
pmb3317	371.1	179.2	Quinacyl syringic acid	Quinate and its derivatives	Negative	1.9	372.1	[M-H]-	75600	76400	75300	113000	117000	97900	113000	141000	148000	89800	71100	76300	135000	125000	72200	-
pmb3894	329.1	314.3	Di-O-methylquercetin	Flavonol	Negative	5.86	330.1	[M-H]-	165000	187000	195000	213000	206000	227000	111000	223000	226000	225000	238000	234000	97400	103000	84700	-
pmb5304	277.1	233.7	α-Linolenic acid	Lipids_Fatty acids	Negative	10.56	278.1	[M-H]-	63300	56700	53000	64300	61700	61500	60500	52500	78500	63800	52300	53700	49500	57400	49600	C06427	C06427	ko01100//Metabolic pathways;ko01110//Biosynthesis of secondary metabolites;ko00592//alphaLinolenic acid metabolism;ko01040//Biosynthesis of unsaturated fatty acids	Global and Overview;Lipid metabolism	Metabolism
pmc0066	333.1	137	2'-Deoxyinosine-5'-monophosphate	Nucleotide and its derivates	Positive	0.67	332.1	[M+H]+	140000	231000	236000	603000	400000	559000	360000	109000	409000	154000	321000	131000	119000	249000	141000	C06196	C06196	ko00230//Purine metabolism	Nucleotide metabolism	Metabolism
pmc0274	167.1	121	6-Methylmercaptopurine	Nucleotide and its derivates	Positive	1.96	166.1	[M+H]+	2870000	4120000	3780000	5140000	4410000	4450000	3460000	3560000	2490000	3260000	5380000	3730000	2880000	2440000	2250000	C16614
pmc0281	400.2	136.1	Adenosine O-ribose	Nucleotide and its derivates	Positive	2.05	399.2	[M+H]+	215000	351000	410000	384000	325000	366000	551000	370000	2470000	370000	416000	348000	357000	274000	4840	-
pmc0304	384.1	252.2	Succinyladenosine	Nucleotide and its derivates	Positive	2.19	383.1	[M+H]+	3860000	7260000	7230000	9240000	9590000	6660000	8650000	8060000	7140000	5290000	6600000	5130000	6780000	7380000	6280000	-
pmc0682	133.1	105	4-Aminoindole	Indole derivatives	Positive	4.16	132.1	[M+H]+	1440000	1130000	1100000	777000	824000	813000	784000	589000	596000	833000	1360000	1030000	1040000	917000	1180000	-
pmc0960	544.4	544.4	LysoPC 20:4	Lipids_Glycerophospholipids	Positive	8.89	543.4	[M+H]+	697000	453000	322000	744000	539000	789000	348000	394000	484000	406000	421000	447000	460000	534000	516000	-
pmc1990	299.1	74.8	4'-Hydroxy-5,7-dimethoxyflavanone	Flavanone	Negative	6.74	300.1	[M-H]-	1490000	2990000	3160000	446000	266000	314000	280000	347000	427000	457000	413000	241000	296000	528000	312000	-
pmd0017	203	112	Spermine	Phenolamides	Positive	0.6	202	[M+H]+	441000	945000	1070000	885000	909000	941000	1030000	1030000	1090000	919000	916000	935000	939000	967000	996000	C00750	C00750	ko01100//Metabolic pathways;ko00330//Arginine and proline metabolism;ko00480//Glutathione metabolism;ko00410//betaAlanine metabolism	Amino acid metabolism;Metabolism of other amino acids;Global and Overview	Metabolism
pmd0023	266	134.2	Adenosine	Nucleotide and its derivates	Negative	1.88	267	[M-H]-	148000	181000	203000	172000	537000	143000	115000	164000	71900	237000	82600	236000	134000	44700	148000	C00212	C00212	ko01100//Metabolic pathways;ko00230//Purine metabolism	Global and Overview;Nucleotide metabolism	Metabolism
pmd0130	468.3	450.5	LysoPC 14:0 (2n isomer)	Lipids_Glycerophospholipids	Positive	7.5	467.3	[M+H]+	28300	10700	20400	4110	11200	11500	44600	38200	31700	10900	7070	8540	23500	23400	29000	-
pmd0132	496.3	478.3	LysoPC 16:0 (2n isomer)	Lipids_Glycerophospholipids	Positive	8.57	495.3	[M+H]+	1080000	808000	780000	469000	334000	402000	523000	546000	502000	554000	590000	496000	792000	590000	850000	-
pmd0144	550.4	245.1	LysoPC 20:1 (2n isomer)	Lipids_Glycerophospholipids	Positive	9.81	549.4	[M+H]+	22300	17000	18300	24600	23700	22900	14900	23300	16600	33400	33800	30300	33600	29100	38000	-
pmd0145	550.4	245.1	LysoPC 20:1	Lipids_Glycerophospholipids	Positive	9.9	549.4	[M+H]+	44400	26400	24100	44100	36400	40200	20200	54400	26300	41200	61200	59100	49100	46400	46100	-
pmd0158	424.2	285.8	LysoPE 14:0 (2n isomer)	Lipids_Glycerophospholipids	Negative	7.37	425.2	[M-H]-	21200	20700	19500	16000	13300	16500	15100	23100	18100	16200	23600	17200	42700	32900	33900	-
pmd0160	452.3	255.3	LysoPE 16:0 (2n isomer)	Lipids_Glycerophospholipids	Negative	8.55	453.3	[M-H]-	12100000	8430000	5810000	7910000	8450000	8090000	6780000	8900000	6870000	13100000	14100000	13100000	23500000	17100000	23800000	-
pme0003	188.1	145.2	L-Homocitrulline	Amino acids	Negative	0.78	189.111	[M-H]-	11500	10400	10700	17800	13300	20100	9870	10300	16000	10300	12800	21000	9	13200	13200	C02427
pme0005	121	121	Purine	Nucleotide and its derivates	Positive	1.42	120.044	[M+H]+	1370000	2000000	2020000	1790000	2880000	2520000	4200000	1530000	2650000	870000	1520000	1350000	1570000	1890000	1400000	C15587
pme0007	174.1	131.1	L-Citrulline	Amino acids	Negative	0.72	175.096	[M-H]-	15200	20600	18900	14500	11100	22400	11100	14000	25100	23800	35800	13800	9800	25100	19500	C00327	C00327	ko01100//Metabolic pathways;ko01110//Biosynthesis of secondary metabolites;ko01130//Biosynthesis of antibiotics;ko01230//Biosynthesis of amino acids;ko00220//Arginine biosynthesis	Global and Overview;Amino acid metabolism	Metabolism
pme0010	106	59.9	L-Serine	Amino acids	Positive	0.74	105.043	[M+H]+	6980000	7980000	7510000	11000000	13600000	10200000	6810000	5920000	6430000	8780000	7450000	9410000	7780000	8450000	4820000	C00065	C00065	ko01100//Metabolic pathways;ko01110//Biosynthesis of secondary metabolites;ko01120//Microbial metabolism in diverse environments;ko01130//Biosynthesis of antibiotics;ko01230//Biosynthesis of amino acids;ko02010//ABC transporters;ko00970//AminoacyltRNA biosynthesis;ko01200//Carbon metabolism;ko00270//Cysteine and methionine metabolism;ko00260//Glycine, serine and threonine metabolism;ko00460//Cyan…	Biosynthesis of other secondary metabolites;Amino acid metabolism;Translation;Global and Overview;Carbohydrate metabolism;Energy metabolism;Lipid metabolism;Metabolism of other amino acids;Membrane transport	Environmental Information Processing;Genetic Information Processing;Metabolism
pme0011	132	99.9	L-Aspartic acid	Amino acids	Negative	0.71	133.037	[M-H]-	2480000	2710000	2500000	2620000	2770000	2510000	3620000	2490000	4470000	1030000	1330000	1350000	2260000	3240000	2780000	C00049	C00049	ko01100//Metabolic pathways;ko01110//Biosynthesis of secondary metabolites;ko01120//Microbial metabolism in diverse environments;ko01130//Biosynthesis of antibiotics;ko01230//Biosynthesis of amino acids;ko02010//ABC transporters;ko00970//AminoacyltRNA biosynthesis;ko01210//2Oxocarboxylic acid metabolism;ko01200//Carbon metabolism;ko00270//Cysteine and methionine metabolism;ko00260//Glycine, serin…	Metabolism of cofactors and vitamins;Translation;Global and Overview;Amino acid metabolism;Biosynthesis of other secondary metabolites;Metabolism of other amino acids;Membrane transport;Energy metabolism	Metabolism;Environmental Information Processing;Genetic Information Processing
pme0013	146.1	102.1	L-Glutamic acid	Amino acids	Negative	0.72	147.053	[M-H]-	9110000	10700000	9800000	13500000	13200000	11500000	9470000	8270000	12800000	10200000	9990000	11200000	5980000	7700000	7010000	C00025	C00025	ko01100//Metabolic pathways;ko01110//Biosynthesis of secondary metabolites;ko01120//Microbial metabolism in diverse environments;ko01130//Biosynthesis of antibiotics;ko01230//Biosynthesis of amino acids;ko02010//ABC transporters;ko00970//AminoacyltRNA biosynthesis;ko00330//Arginine and proline metabolism;ko01210//2Oxocarboxylic acid metabolism;ko01200//Carbon metabolism;ko00480//Glutathione metab…	Global and Overview;Translation;Metabolism of cofactors and vitamins;Amino acid metabolism;Biosynthesis of other secondary metabolites;Membrane transport;Metabolism of other amino acids;Energy metabolism;Carbohydrate metabolism	Environmental Information Processing;Genetic Information Processing;Metabolism
pme0016	241	119.9	L-(-)-Cystine	Amino acids	Positive	0.77	240.024	[M+H]+	87400	82000	136000	166000	108000	131000	119000	128000	98900	279000	106000	255000	225000	202000	191000	C00491	C00491	ko02010//ABC transporters;ko00270//Cysteine and methionine metabolism	Amino acid metabolism;Membrane transport	Environmental Information Processing;Metabolism
pme0018	130.1	130.1	L-Leucine	Amino acids	Negative	1.24	131.095	[M-H]-	246000	212000	244000	323000	337000	345000	204000	236000	178000	175000	349000	308000	141000	197000	151000	C00123	C00123	ko01100//Metabolic pathways;ko01110//Biosynthesis of secondary metabolites;ko01230//Biosynthesis of amino acids;ko02010//ABC transporters;ko00970//AminoacyltRNA biosynthesis;ko01210//2Oxocarboxylic acid metabolism;ko00966//Glucosinolate biosynthesis;ko00290//Valine, leucine and isoleucine biosynthesis;ko00280//Valine, leucine and isoleucine degradation	Global and Overview;Membrane transport;Translation;Biosynthesis of other secondary metabolites;Amino acid metabolism	Environmental Information Processing;Genetic Information Processing;Metabolism
pme0020	164.1	147.1	L-Phenylalanine	Amino acids	Negative	1.97	165.079	[M-H]-	15800000	17300000	17300000	22400000	19600000	18900000	15400000	16000000	10500000	14600000	24600000	19700000	13600000	11800000	11000000	C00079	C00079	ko01100//Metabolic pathways;ko01110//Biosynthesis of secondary metabolites;ko01130//Biosynthesis of antibiotics;ko01230//Biosynthesis of amino acids;ko02010//ABC transporters;ko00940//Phenylpropanoid biosynthesis;ko00970//AminoacyltRNA biosynthesis;ko01210//2Oxocarboxylic acid metabolism;ko00360//Phenylalanine metabolism;ko00400//Phenylalanine, tyrosine and tryptophan biosynthesis;ko00460//Cyanoa…	Biosynthesis of other secondary metabolites;Amino acid metabolism;Global and Overview;Translation;Metabolism of other amino acids;Membrane transport	Genetic Information Processing;Environmental Information Processing;Metabolism
pme0022	118	100.9	L-Threonine	Amino acids	Negative	0.74	119.058	[M-H]-	999000	1230000	1270000	1580000	791000	1500000	1220000	991000	1310000	864000	1170000	1200000	437000	840000	465000	C00188	C00188	ko01100//Metabolic pathways;ko01110//Biosynthesis of secondary metabolites;ko01120//Microbial metabolism in diverse environments;ko01130//Biosynthesis of antibiotics;ko01230//Biosynthesis of amino acids;ko02010//ABC transporters;ko00970//AminoacyltRNA biosynthesis;ko00260//Glycine, serine and threonine metabolism;ko00261//Monobactam biosynthesis;ko00290//Valine, leucine and isoleucine biosynthesi…	Global and Overview;Membrane transport;Metabolism of cofactors and vitamins;Translation;Biosynthesis of other secondary metabolites;Amino acid metabolism	Environmental Information Processing;Genetic Information Processing;Metabolism
pme0026	147	83.2	L-(+)-Lysine	Amino acids	Positive	0.68	146.106	[M+H]+	5390000	6450000	6300000	9240000	9780000	9030000	5150000	4550000	4440000	4260000	7920000	7930000	5570000	6770000	4580000	C00047	C00047	ko01100//Metabolic pathways;ko01110//Biosynthesis of secondary metabolites;ko01120//Microbial metabolism in diverse environments;ko01130//Biosynthesis of antibiotics;ko01230//Biosynthesis of amino acids;ko02010//ABC transporters;ko00970//AminoacyltRNA biosynthesis;ko01210//2Oxocarboxylic acid metabolism;ko00310//Lysine degradation;ko00300//Lysine biosynthesis;ko00960//Tropane, piperidine and pyri…	Amino acid metabolism;Biosynthesis of other secondary metabolites;Metabolism of cofactors and vitamins;Membrane transport;Translation;Global and Overview	Environmental Information Processing;Genetic Information Processing;Metabolism
pme0030	182.1	136.1	L-(-)-Tyrosine	Amino acids	Positive	1.13	181.074	[M+H]+	5330000	4810000	4930000	6800000	6020000	6170000	4400000	4400000	3400000	3620000	5450000	5890000	4870000	3760000	3960000	C00082	C00082	ko01100//Metabolic pathways;ko01110//Biosynthesis of secondary metabolites;ko01130//Biosynthesis of antibiotics;ko01230//Biosynthesis of amino acids;ko00940//Phenylpropanoid biosynthesis;ko00970//AminoacyltRNA biosynthesis;ko01210//2Oxocarboxylic acid metabolism;ko00350//Tyrosine metabolism;ko00360//Phenylalanine metabolism;ko00400//Phenylalanine, tyrosine and tryptophan biosynthesis;ko00460//Cya…	Biosynthesis of other secondary metabolites;Amino acid metabolism;Global and Overview;Translation;Metabolism of cofactors and vitamins;Metabolism of other amino acids	Metabolism;Genetic Information Processing
pme0031	127	110	Thymine	Nucleotide and its derivates	Positive	1.56	126.043	[M+H]+	64800	84700	100000	103000	78300	80300	128000	58300	60900	81600	116000	90400	41300	82000	92900	C00178	C00178	ko01100//Metabolic pathways;ko00240//Pyrimidine metabolism	Global and Overview;Nucleotide metabolism	Metabolism
pme0032	135	92	Hypoxanthine	Nucleotide and its derivates	Negative	1.29	136.038	[M-H]-	19800	24300	25900	20900	19400	15500	12300	14700	20000	59700	54500	39700	10400	9060	18700	C00262	C00262	ko01100//Metabolic pathways;ko00230//Purine metabolism	Nucleotide metabolism;Global and Overview	Metabolism
pme0037	156.1	110	L-Histidine	Amino acids	Positive	0.68	155.07	[M+H]+	1570000	1830000	1650000	1970000	2810000	2990000	1850000	2970000	2260000	1110000	1860000	1540000	1520000	1740000	1880000	C00135	C00135	ko01100//Metabolic pathways;ko01110//Biosynthesis of secondary metabolites;ko01230//Biosynthesis of amino acids;ko02010//ABC transporters;ko00970//AminoacyltRNA biosynthesis;ko00410//betaAlanine metabolism;ko00340//Histidine metabolism	Amino acid metabolism;Global and Overview;Translation;Metabolism of other amino acids;Membrane transport	Metabolism;Genetic Information Processing;Environmental Information Processing
pme0038	112	95	Cytosine	Nucleotide and its derivates	Positive	0.75	111.043	[M+H]+	647000	792000	772000	1080000	909000	986000	535000	502000	611000	1080000	996000	1110000	388000	486000	513000	C00380	C00380	ko01100//Metabolic pathways;ko00240//Pyrimidine metabolism	Nucleotide metabolism;Global and Overview	Metabolism
pme0042	173.1	131.1	L-(+)-Arginine	Amino acids	Negative	0.71	174.112	[M-H]-	114000	160000	140000	250000	233000	241000	88200	68500	75300	145000	209000	188000	45700	152000	65200	C00062	C00062	ko01100//Metabolic pathways;ko01110//Biosynthesis of secondary metabolites;ko01130//Biosynthesis of antibiotics;ko01230//Biosynthesis of amino acids;ko02010//ABC transporters;ko00970//AminoacyltRNA biosynthesis;ko00330//Arginine and proline metabolism;ko00220//Arginine biosynthesis;ko00261//Monobactam biosynthesis;ko00472//DArginine and Dornithine metabolism	Membrane transport;Metabolism of other amino acids;Translation;Global and Overview;Biosynthesis of other secondary metabolites;Amino acid metabolism	Metabolism;Environmental Information Processing;Genetic Information Processing
pme0049	110	64.9	2-Aminoethanesulfinic acid	Organic acids	Positive	0.76	109.02	[M+H]+	155000	103000	80100	125000	137000	104000	89900	95100	85200	55900	72600	89500	83500	89400	98500	C00519	C00519	ko01100//Metabolic pathways;ko00430//Taurine and hypotaurine metabolism	Metabolism of other amino acids;Global and Overview	Metabolism
pme0050	203	116.1	L-Tryptophan	Amino acids	Negative	2.47	204.09	[M-H]-	6040000	6270000	7280000	10100000	17200000	11500000	4620000	4860000	3690000	3970000	8680000	6850000	7460000	6820000	7570000	C00078	C00078	ko01100//Metabolic pathways;ko01110//Biosynthesis of secondary metabolites;ko01130//Biosynthesis of antibiotics;ko01230//Biosynthesis of amino acids;ko00970//AminoacyltRNA biosynthesis;ko01210//2Oxocarboxylic acid metabolism;ko00380//Tryptophan metabolism;ko00260//Glycine, serine and threonine metabolism;ko00400//Phenylalanine, tyrosine and tryptophan biosynthesis;ko00966//Glucosinolate biosynthe…	Global and Overview;Translation;Amino acid metabolism;Biosynthesis of other secondary metabolites	Genetic Information Processing;Metabolism
pme0056	145.1	101	2,3-dimethylsuccinic acid	Amino acid derivatives	Negative	2.63	146.058	[M-H]-	325000	390000	361000	339000	230000	481000	292000	330000	442000	419000	538000	373000	276000	433000	376000	-
pme0057	136	89.9	DL-homocysteine	Amino acids	Positive	0.81	135.035	[M+H]+	248000	304000	323000	381000	366000	407000	197000	228000	152000	193000	303000	304000	191000	299000	94800	C00155	C00155	ko01100//Metabolic pathways;ko01110//Biosynthesis of secondary metabolites;ko01230//Biosynthesis of amino acids;ko00270//Cysteine and methionine metabolism;ko00920//Sulfur metabolism	Global and Overview;Amino acid metabolism;Energy metabolism	Metabolism
pme0064	513.3	513.2	Cucurbitacin I	Terpenoids	Negative	6.18	514.293	[M-H]-	3400	8320	8040	6700	3920	2910	8670	8110	3030	7900	4240	6340	5990	7600	6590	C08800
pme0066	116.1	73.9	Guanidineacetic acid	Amino acid derivatives	Negative	0.69	117.054	[M-H]-	32900	26400	22800	22000	16700	37800	17300	35500	31600	27400	28600	32900	19400	15500	15400	C00581	C00581	ko01100//Metabolic pathways;ko00330//Arginine and proline metabolism;ko00260//Glycine, serine and threonine metabolism	Amino acid metabolism;Global and Overview	Metabolism
pme0076	190.1	130.1	N-Acetyl-L-glutamic acid	Amino acid derivatives	Positive	1.23	189.064	[M+H]+	396000	439000	356000	331000	275000	337000	429000	258000	592000	269000	382000	339000	440000	481000	611000	C00624	C00624	ko01100//Metabolic pathways;ko01110//Biosynthesis of secondary metabolites;ko01130//Biosynthesis of antibiotics;ko01230//Biosynthesis of amino acids;ko01210//2Oxocarboxylic acid metabolism;ko00220//Arginine biosynthesis	Amino acid metabolism;Global and Overview	Metabolism
pme0085	359.3	161	Rosmarinic acid	Organic acids	Negative	4.15	360.3	[M-H]-	25900	27400	34100	94000	117000	34600	19500	33400	53200	9400	16100	7250	14700	9990	4600	C01850	C01850	ko00350//Tyrosine metabolism	Amino acid metabolism	Metabolism
pme0094	447.3	284.1	Cyanidin 3-O-glucoside (Kuromanin)	Anthocyanins	Negative	2.55	448.3	[M-H]-	348000	402000	409000	378000	456000	353000	415000	365000	437000	533000	547000	462000	374000	557000	459000	C08604	C08604	ko00942//Anthocyanin biosynthesis	Biosynthesis of other secondary metabolites	Metabolism
pme0108	126.1	126.1	5-Methylcytosine	Nucleotide and its derivates	Positive	1.13	125.059	[M+H]+	85300	141000	171000	125000	175000	111000	142000	115000	137000	174000	140000	149000	133000	159000	132000	C02376	C02376	ko00240//Pyrimidine metabolism	Nucleotide metabolism	Metabolism
pme0109	212.2	166.1	(-)-3-(3,4-Dihydroxyphenyl)-2-methylalanine	Amino acid derivatives	Positive	1.22	211.084	[M+H]+	59200	63800	64300	65300	102000	57300	141000	72600	115000	80700	97100	84200	110000	87500	86400	C07194
pme0118	110.1	65.9	Pyrrole-2-carboxylic acid	Amino acid derivatives	Negative	2.88	111.032	[M-H]-	51200	52900	49300	74800	60600	44100	60400	81400	52100	28800	46800	44200	38500	28200	22800	C05942	C05942	ko00330//Arginine and proline metabolism	Amino acid metabolism	Metabolism
pme0120	118.2	101	5-Aminovaleric acid	Amino acid derivatives	Positive	0.8	117.079	[M+H]+	30500	59000	64200	42100	115000	58100	33000	113000	63100	55700	80300	64200	68200	355000	86000	C00431	C00431	ko00330//Arginine and proline metabolism;ko00310//Lysine degradation	Amino acid metabolism	Metabolism
pme0122	189.2	84	N6-Acetyl-L-lysine	Amino acid derivatives	Positive	1.02	188.116	[M+H]+	664000	753000	716000	980000	730000	734000	699000	568000	649000	533000	1030000	822000	699000	764000	495000	C02727	C02727	ko00310//Lysine degradation	Amino acid metabolism	Metabolism
pme0124	173.2	116.1	Glycyl-L-proline	Amino acid derivatives	Positive	0.79	172.085	[M+H]+	44700	77300	60400	71500	60600	65700	107000	60200	110000	63600	58100	59700	55000	63300	59800	-
pme0129	161.2	101.9	D-Alanyl-D-Alanine	Amino acid derivatives	Positive	0.74	160.085	[M+H]+	78400	118000	109000	111000	95700	113000	129000	140000	177000	140000	81500	72100	124000	91300	124000	C00993	C00993	ko01100//Metabolic pathways	Global and Overview	Metabolism
pme0133	281.3	120	Asp-phe	Amino acid derivatives	Positive	2.49	280.106	[M+H]+	89300	152000	153000	214000	167000	198000	130000	136000	133000	140000	244000	149000	96200	118000	112000	-
pme0137	187.2	127.1	Nα-Acetyl-L-glutamine	Amino acid derivatives	Negative	1.17	188.08	[M-H]-	37800	31300	49200	47300	32000	33000	41800	51300	35000	38600	48100	40000	42600	38500	67300	-
pme0152	129.1	86	5,6-Dihydro-5-methyluracil	Nucleotide and its derivates	Positive	1.5	128.059	[M+H]+	106000	210000	146000	150000	122000	154000	68300	236000	129000	115000	108000	109000	161000	107000	142000	C00906
pme0161	118.1	101	L-Homoserine	Amino acids	Negative	0.74	119.058	[M-H]-	18100	24800	22800	17000	10900	15300	18700	14400	26000	14900	20900	22000	4750	8090	9920	C00263	C00263	ko01100//Metabolic pathways;ko01110//Biosynthesis of secondary metabolites;ko01120//Microbial metabolism in diverse environments;ko01130//Biosynthesis of antibiotics;ko01230//Biosynthesis of amino acids;ko00270//Cysteine and methionine metabolism;ko00260//Glycine, serine and threonine metabolism;ko00300//Lysine biosynthesis;ko00920//Sulfur metabolism	Global and Overview;Amino acid metabolism;Energy metabolism	Metabolism
pme0163	335.1	122.8	β-Nicotinamide mononucleotide	Nucleotide and its derivates	Positive	0.79	334.057	[M+H]+	270000	372000	390000	237000	347000	288000	501000	326000	424000	315000	346000	268000	474000	495000	990000	C00455	C00455	ko01100//Metabolic pathways;ko00760//Nicotinate and nicotinamide metabolism	Metabolism of cofactors and vitamins;Global and Overview	Metabolism
pme0166	167.1	110	1-Methylxanthine	Nucleotide and its derivates	Positive	1.98	166.049	[M+H]+	57200	62300	61300	48300	50000	64300	50500	52000	54800	45600	72100	75800	71500	66000	66900	C16358	C16358	ko01100//Metabolic pathways;ko01110//Biosynthesis of secondary metabolites;ko01120//Microbial metabolism in diverse environments;ko00232//Caffeine metabolism	Biosynthesis of other secondary metabolites;Global and Overview	Metabolism
pme0170	217.1	158.1	Nα-Acetyl-L-arginine	Amino acid derivatives	Positive	1.12	216.122	[M+H]+	296000	537000	510000	540000	338000	400000	561000	533000	563000	432000	571000	509000	507000	402000	448000	-
pme0173	130.1	73.8	N-Propionylglycine	Amino acid derivatives	Negative	1.28	131.058	[M-H]-	90500	110000	120000	124000	93600	87500	90900	113000	131000	65300	118000	71200	108000	111000	97700	-
pme0177	265.1	130.1	Phenylacetyl-L-glutamine	Amino acid derivatives	Positive	3.15	264.111	[M+H]+	21500	36800	16300	53700	9	42300	23300	64800	45600	9	9	27900	33700	27000	9	C04148	C04148	ko00360//Phenylalanine metabolism	Amino acid metabolism	Metabolism
pme0180	168.1	151.1	1-Methylhistidine	Amino acid derivatives	Negative	0.68	169.085	[M-H]-	12600	18200	11200	17100	9200	23200	8570	11400	23500	8150	6650	10600	10900	21800	14500	C01152	C01152	ko00340//Histidine metabolism	Amino acid metabolism	Metabolism
pme0183	152.1	135.1	2-Hydroxy-6-aminopurine	Nucleotide and its derivates	Positive	0.85	151.049	[M+H]+	811000	947000	836000	960000	869000	952000	997000	797000	1260000	822000	1120000	878000	674000	912000	812000	-
pme0191	189.1	86	N-Glycyl-L-leucine	Amino acid derivatives	Positive	1.92	188.116	[M+H]+	515000	711000	653000	851000	736000	949000	608000	638000	744000	734000	827000	662000	465000	559000	9	C02155
pme0193	147.1	83.7	L-Glutamine	Amino acids	Positive	0.68	146.069	[M+H]+	5120000	5790000	5460000	8430000	8950000	8100000	4620000	3970000	4180000	3790000	7140000	7300000	4780000	6500000	4000000	C00064	C00064	ko01100//Metabolic pathways;ko01120//Microbial metabolism in diverse environments;ko01230//Biosynthesis of amino acids;ko02010//ABC transporters;ko00230//Purine metabolism;ko00970//AminoacyltRNA biosynthesis;ko00240//Pyrimidine metabolism;ko00250//Alanine, aspartate and glutamate metabolism;ko00220//Arginine biosynthesis;ko00630//Glyoxylate and dicarboxylate metabolism;ko00910//Nitrogen metabolism	Translation;Membrane transport;Nucleotide metabolism;Global and Overview;Amino acid metabolism;Carbohydrate metabolism;Energy metabolism	Genetic Information Processing;Environmental Information Processing;Metabolism
pme0195	120	80	L-Cysteine	Amino acids	Negative	0.78	121.02	[M-H]-	21400	24900	23100	9950	13800	7480	50300	9990	6820	7020	121000	16200	8270	28900	5860	C00097	C00097	ko01100//Metabolic pathways;ko01110//Biosynthesis of secondary metabolites;ko01120//Microbial metabolism in diverse environments;ko01130//Biosynthesis of antibiotics;ko01230//Biosynthesis of amino acids;ko00970//AminoacyltRNA biosynthesis;ko01200//Carbon metabolism;ko00270//Cysteine and methionine metabolism;ko00260//Glycine, serine and threonine metabolism;ko00480//Glutathione metabolism;ko00460…	Amino acid metabolism;Biosynthesis of other secondary metabolites;Global and Overview;Metabolism of cofactors and vitamins;Translation;Folding, sorting and degradation;Energy metabolism;Metabolism of other amino acids	Metabolism;Genetic Information Processing
pme0199	301	151.1	Quercetin	Flavonol	Negative	5.08	302.043	[M-H]-	161000	184000	175000	61200	66800	42400	120000	314000	116000	65300	116000	45700	44000	66800	168000	C00389	C00389	ko01100//Metabolic pathways;ko01110//Biosynthesis of secondary metabolites;ko00941//Flavonoid biosynthesis;ko00944//Flavone and flavonol biosynthesis	Biosynthesis of other secondary metabolites;Global and Overview	Metabolism
pme0200	287	287	Kaempferol	Flavonol	Positive	5.69	286.048	[M+H]+	330000	274000	287000	171000	186000	110000	311000	341000	174000	119000	456000	76700	28400	74700	118000	C05903	C05903	ko01100//Metabolic pathways;ko01110//Biosynthesis of secondary metabolites;ko00941//Flavonoid biosynthesis;ko00944//Flavone and flavonol biosynthesis	Global and Overview;Biosynthesis of other secondary metabolites	Metabolism
pme0202	611.2	303	Quercetin 3-O-rutinoside (Rutin)	Flavonol	Positive	3.56	610.153	[M+H]+	72900	71000	89200	98300	77200	115000	66700	66900	63700	52800	51700	51600	41900	28600	47000	C05625	C05625	ko01100//Metabolic pathways;ko01110//Biosynthesis of secondary metabolites;ko00944//Flavone and flavonol biosynthesis	Biosynthesis of other secondary metabolites;Global and Overview	Metabolism
pme0207	103	103	3-Hydroxybutyrate	Organic acids	Negative	1.39	104.047	[M-H]-	110000	109000	95600	111000	78500	91100	143000	59800	126000	89400	85900	68600	54900	115000	84800	-
pme0226	131.1	71.8	L-Asparagine	Amino acids	Negative	0.73	132.054	[M-H]-	111000	115000	103000	145000	100000	165000	85200	94000	116000	78900	94900	118000	62700	187000	61700	C00152	C00152	ko01100//Metabolic pathways;ko01110//Biosynthesis of secondary metabolites;ko01230//Biosynthesis of amino acids;ko00970//AminoacyltRNA biosynthesis;ko00250//Alanine, aspartate and glutamate metabolism;ko00460//Cyanoamino acid metabolism	Translation;Metabolism of other amino acids;Global and Overview;Amino acid metabolism	Metabolism;Genetic Information Processing
pme0231	247.1	130.1	N-(3-Indolylacetyl)-L-alanine	Amino acid derivatives	Positive	4.03	246.1	[M+H]+	285000	287000	280000	318000	311000	317000	259000	206000	257000	204000	192000	170000	182000	200000	161000	-
pme0233	188	144.1	Kynurenic acid	Organic acids	Negative	2.71	189.043	[M-H]-	4090000	4150000	4220000	3900000	3800000	4310000	6410000	3140000	4000000	4920000	5780000	4530000	3130000	4350000	3370000	C01717	C01717	ko01100//Metabolic pathways;ko00380//Tryptophan metabolism	Global and Overview;Amino acid metabolism	Metabolism
pme0237	183.1	137.1	Ethyl 3,4-Dihydroxybenzoate (Ethyl protocatechuate)	Organic acids	Positive	4.63	182.058	[M+H]+	302000	191000	190000	210000	164000	206000	163000	373000	91900	157000	132000	208000	179000	108000	136000	-
pme0239	111	79.9	2–furanoic acid	Organic acids	Negative	2.17	112.016	[M-H]-	1230000	1510000	1340000	743000	718000	1420000	1810000	915000	1750000	1090000	1460000	1220000	963000	1070000	1060000	-
pme0241	123	76.9	Benzoic acid	Benzoic acid derivatives	Positive	4.53	122.037	[M+H]+	108000	188000	172000	172000	167000	87800	164000	53900	83100	162000	197000	180000	85500	106000	86000	C00180	C00180	ko01100//Metabolic pathways;ko01110//Biosynthesis of secondary metabolites;ko01120//Microbial metabolism in diverse environments;ko01220//Degradation of aromatic compounds;ko00360//Phenylalanine metabolism	Amino acid metabolism;Global and Overview	Metabolism
pme0243	131	86.9	Glutaric acid	Organic acids	Negative	1.9	132.042	[M-H]-	2000000	2390000	2650000	1710000	1950000	1360000	2000000	2590000	2180000	1670000	3030000	1840000	2000000	1940000	2490000	C00489	C00489	ko00310//Lysine degradation;ko00071//Fatty acid degradation	Lipid metabolism;Amino acid metabolism	Metabolism
pme0244	147.1	91	Adipic acid	Organic acids	Positive	2.56	146.058	[M+H]+	9	9	9	9	9	9	9	9	9	56000	231000	9	68700	45800	60400	C06104	C06104	ko01100//Metabolic pathways;ko01120//Microbial metabolism in diverse environments;ko01220//Degradation of aromatic compounds	Global and Overview	Metabolism
pme0250	187.1	125.1	Azelaic Acid	Organic acids	Negative	4.43	188.105	[M-H]-	1030000	1160000	1170000	1020000	1560000	1070000	1340000	1140000	1520000	1400000	1270000	1250000	1060000	1270000	1220000	C08261
pme0252	172.1	130	N-Acetyl-l-leucine	Amino acid derivatives	Negative	3.41	173.105	[M-H]-	271000	298000	295000	385000	300000	403000	364000	259000	274000	227000	314000	229000	175000	210000	178000	C02710
pme0255	242.1	80.9	Cytidine	Nucleotide and its derivates	Negative	1.19	243.086	[M-H]-	6700	6500	7490	9740	11400	10400	9	5780	9	10800	11000	8500	4960	4200	9	C00475	C00475	ko01100//Metabolic pathways;ko00240//Pyrimidine metabolism	Nucleotide metabolism;Global and Overview	Metabolism
pme0257	111	111	Uracil	Nucleotide and its derivates	Negative	1	112.027	[M-H]-	3350000	3940000	3640000	3590000	3950000	3450000	1790000	2140000	1930000	3720000	2780000	2780000	2660000	3280000	3240000	C00106	C00106	ko01100//Metabolic pathways;ko00240//Pyrimidine metabolism;ko00410//betaAlanine metabolism;ko00770//Pantothenate and CoA biosynthesis	Metabolism of other amino acids;Metabolism of cofactors and vitamins;Nucleotide metabolism;Global and Overview	Metabolism
pme0263	259.1	126.7	5-Methyluridine	Nucleotide and its derivates	Positive	1.78	258.085	[M+H]+	31400	45300	53100	80400	57300	63700	51400	67900	43300	34500	52400	49300	36300	9	16200	-
pme0264	243.1	127.1	Thymidine	Nucleotide and its derivates	Positive	2.08	242.09	[M+H]+	74100	160000	144000	215000	156000	206000	164000	190000	194000	171000	169000	86100	77900	138000	72400	C00214	C00214	ko01100//Metabolic pathways;ko00240//Pyrimidine metabolism	Nucleotide metabolism;Global and Overview	Metabolism
pme0267	131	86.9	2-Methylsuccinic acid	Organic acids	Negative	2.08	132.042	[M-H]-	2060000	2520000	2580000	1720000	1980000	1350000	2010000	2480000	2150000	1710000	3130000	1830000	1950000	1830000	2510000	-
pme0269	229.2	167.2	Dodecanedioic aicd	Organic acids	Negative	6.12	230.152	[M-H]-	1180	2780	1500	2420	1720	2090	1630	1830	2800	2060	2250	2050	2240	2380	1470	C02678
pme0270	117	98.9	Maleic acid	Organic acids	Positive	1.26	116.011	[M+H]+	72800	157000	124000	121000	144000	89600	82700	102000	51200	192000	202000	371000	119000	225000	181000	C01384	C01384	ko01120//Microbial metabolism in diverse environments;ko00350//Tyrosine metabolism;ko00760//Nicotinate and nicotinamide metabolism;ko00650//Butanoate metabolism	Carbohydrate metabolism;Amino acid metabolism;Global and Overview;Metabolism of cofactors and vitamins	Metabolism
pme0274	132.1	76.9	6-Aminocaproic acid	Organic acids	Positive	1	131.095	[M+H]+	294000	508000	357000	552000	495000	595000	492000	552000	462000	318000	568000	391000	302000	551000	258000	C02378	C02378	ko01100//Metabolic pathways;ko01120//Microbial metabolism in diverse environments	Global and Overview	Metabolism
pme0275	115	97.9	4-Oxopentanoate	Organic acids	Negative	1.97	116.047	[M-H]-	19300	22200	21300	16700	13000	17600	17200	18400	22300	12300	18600	21600	15800	20300	18700	-
pme0279	189.1	128.1	2,6-Diaminooimelic acid	Amino acid derivatives	Negative	0.77	190.095	[M-H]-	39900	47700	48600	53400	54500	62400	34200	44300	57700	45800	60900	48000	30100	24500	28200	C00666	C00666	ko01100//Metabolic pathways;ko01110//Biosynthesis of secondary metabolites;ko01120//Microbial metabolism in diverse environments;ko01130//Biosynthesis of antibiotics;ko01230//Biosynthesis of amino acids;ko00300//Lysine biosynthesis	Amino acid metabolism;Global and Overview	Metabolism
pme0281	165	121.1	Terephthalic acid	Organic acids	Negative	3	166.027	[M-H]-	258000	458000	235000	388000	541000	440000	450000	388000	439000	399000	317000	277000	317000	295000	354000	C06337	C06337	ko01100//Metabolic pathways;ko01120//Microbial metabolism in diverse environments;ko01220//Degradation of aromatic compounds	Global and Overview	Metabolism
pme0283	167	149.1	Phthalic acid	Organic acids	Positive	2.89	166.027	[M+H]+	230000	243000	288000	207000	229000	137000	313000	296000	211000	355000	292000	306000	493000	320000	367000	C01606	C01606	ko01100//Metabolic pathways;ko01120//Microbial metabolism in diverse environments;ko02010//ABC transporters;ko01220//Degradation of aromatic compounds	Membrane transport;Global and Overview	Environmental Information Processing;Metabolism
pme0285	146.1	85.9	4-Guanidinobutyric acid	Organic acids	Positive	0.77	145.085	[M+H]+	3510000	4860000	3880000	3510000	8250000	3350000	2960000	3270000	1400000	6760000	7140000	5830000	4030000	3870000	5560000	C01035	C01035	ko01100//Metabolic pathways;ko00330//Arginine and proline metabolism	Amino acid metabolism;Global and Overview	Metabolism
pme0286	131.1	85	2-Hydroxyisocaproic acid	Organic acids	Negative	3.48	132.079	[M-H]-	21300	30000	21200	20200	22700	21800	35100	18600	27200	25600	22300	17700	17600	22500	19100	-
pme0289	151.1	78.8	4-Ethylbenzoic acid	Organic acids	Positive	5.92	150.068	[M+H]+	38300	29100	31800	31800	32400	44500	35700	22600	34800	29100	34500	17200	25900	19400	17200	-
pme0291	160.1	114.1	Dl-2-Aminooctanoic acid	Organic acids	Positive	3.03	159.126	[M+H]+	47100	38700	53500	14700	14900	153000	14600	12100	95300	59300	61900	109000	8680	15400	14300	-
pme0292	195.1	121	(3,4-Dimethoxyphenyl) acetic acid	Organic acids	Negative	3.9	196.074	[M-H]-	21900	27000	33000	25100	17700	27300	22800	31900	22300	22700	28300	33700	30600	26800	33700	-
pme0300	149.1	103	Cinnamic acid	Hydroxycinnamoyl derivatives	Positive	5.22	148.052	[M+H]+	149000	133000	113000	87200	82900	72100	126000	98400	119000	102000	175000	248000	64000	119000	82700	C00423
pme0303	179	135.1	Caffeic acid	Hydroxycinnamoyl derivatives	Negative	3.16	180.042	[M-H]-	923000	833000	936000	944000	855000	851000	890000	1230000	813000	770000	1160000	1190000	1020000	815000	928000	C01197	C01197	ko01100//Metabolic pathways;ko01110//Biosynthesis of secondary metabolites;ko00940//Phenylpropanoid biosynthesis;ko01220//Degradation of aromatic compounds	Global and Overview;Biosynthesis of other secondary metabolites	Metabolism
pme0306	195.1	149.1	Ferulic acid	Hydroxycinnamoyl derivatives	Positive	4.01	194.058	[M+H]+	949000	774000	717000	977000	749000	860000	657000	443000	493000	793000	647000	435000	541000	325000	471000	C01494	C01494	ko01100//Metabolic pathways;ko01110//Biosynthesis of secondary metabolites;ko00940//Phenylpropanoid biosynthesis	Biosynthesis of other secondary metabolites;Global and Overview	Metabolism
pme0309	183	124.1	Methyl gallate	Benzoic acid derivatives	Negative	3.11	184.037	[M-H]-	9	9	9	9	9	9	9	9	9	9	67400	9	9	9	9	-
pme0363	299.1	284	Chrysoeriol	Flavone	Negative	5.71	300.063	[M-H]-	8020	7330	6950	13200	4400	3120	6300	4030	6250	2620	22300	5780	6000	3250	4280	C04293	C04293	ko00944//Flavone and flavonol biosynthesis	Biosynthesis of other secondary metabolites	Metabolism
pme0368	579.2	271.1	Apigenin 7-rutinoside (Isorhoifolin)	Flavone	Positive	3.96	578.164	[M+H]+	9	9	9	9	9	9	9	9	9	9	69700	9	9	21200	9	-
pme0369	593.2	285.1	Kaempferol 3-O-rutinoside (Nicotiflorin)	Flavonol	Negative	3.79	594.159	[M-H]-	32200	48100	39700	44800	19900	35500	34400	20500	216000	9	24700	6680	9	22200	20300	-
pme0372	435.1	273.1	Naringenin 7-O-glucoside (Prunin)	Flavanone	Positive	4.17	434.121	[M+H]+	1730000	1700000	1680000	1680000	1550000	1780000	2030000	929000	1200000	2450000	1650000	1260000	1300000	1060000	1340000	C09099	C09099	ko00941//Flavonoid biosynthesis	Biosynthesis of other secondary metabolites	Metabolism
pme0377	273.1	153.1	Naringenin	Flavanone	Positive	5.6	272.068	[M+H]+	111000	107000	110000	115000	89800	117000	132000	89300	115000	99300	136000	53600	60800	83100	93800	C00509	C00509	ko01100//Metabolic pathways;ko01110//Biosynthesis of secondary metabolites;ko00941//Flavonoid biosynthesis;ko00943//Isoflavonoid biosynthesis	Biosynthesis of other secondary metabolites;Global and Overview	Metabolism
pme0388	183.1	137.1	Homovanillic acid	Hydroxycinnamoyl derivatives	Positive	3.25	182.058	[M+H]+	217000	190000	182000	257000	178000	249000	213000	282000	226000	253000	254000	255000	177000	286000	185000	C05582	C05582	ko01100//Metabolic pathways;ko00350//Tyrosine metabolism	Global and Overview;Amino acid metabolism	Metabolism
pme0397	173.1	92.9	Shikimic acid	Organic acids	Negative	0.94	174.053	[M-H]-	75100	93600	120000	92300	68600	143000	55000	36500	54100	136000	114000	117000	93000	104000	94500	C00493	C00493	ko01100//Metabolic pathways;ko01110//Biosynthesis of secondary metabolites;ko01130//Biosynthesis of antibiotics;ko01230//Biosynthesis of amino acids;ko00400//Phenylalanine, tyrosine and tryptophan biosynthesis	Amino acid metabolism;Global and Overview	Metabolism
pme0398	353.1	191.1	Chlorogenic acid (3-O-Caffeoylquinic acid)	Quinate and its derivatives	Negative	2.74	354.095	[M-H]-	6230000	5900000	5540000	4630000	4950000	5630000	2540000	1780000	1100000	9340000	10400000	7230000	9060000	7350000	9680000	C00852	C00852	ko01110//Biosynthesis of secondary metabolites;ko00940//Phenylpropanoid biosynthesis;ko00941//Flavonoid biosynthesis;ko00945//Stilbenoid, diarylheptanoid and gingerol biosynthesis	Biosynthesis of other secondary metabolites;Global and Overview	Metabolism
pme0409	199.1	140.1	Syringic acid	Hydroxycinnamoyl derivatives	Positive	3.35	198.053	[M+H]+	1080000	1500000	1460000	1210000	1220000	1150000	1370000	1350000	1890000	1310000	1540000	1150000	1690000	2170000	1560000	C10833	C10833	ko01120//Microbial metabolism in diverse environments	Global and Overview	Metabolism
pme0414	153	125.1	Vanillin	Benzoic acid derivatives	Positive	3.96	152.047	[M+H]+	2190000	2490000	2390000	1410000	1190000	1200000	1630000	1400000	1600000	1250000	790000	1090000	1100000	852000	538000	C00755	C00755	ko01100//Metabolic pathways;ko01110//Biosynthesis of secondary metabolites;ko01120//Microbial metabolism in diverse environments;ko00360//Phenylalanine metabolism	Global and Overview;Amino acid metabolism	Metabolism
pme0418	165.1	92.9	3-(4-Hydroxyphenyl)propionic acid	Hydroxycinnamoyl derivatives	Negative	3.84	166.063	[M-H]-	42200	50700	32300	23800	24200	42500	18900	27900	61100	35900	95100	24100	14200	9370	19400	C01744
pme0423	195.1	149.1	3-Hydroxy-4-methoxycinnamic acid	Hydroxycinnamoyl derivatives	Positive	4.02	194.058	[M+H]+	758000	750000	868000	749000	789000	888000	460000	323000	392000	762000	613000	597000	273000	402000	344000	-
pme0442	303	149.3	Delphinidin	Anthocyanins	Positive	2.9	303.24	Protonated	1670000	2020000	2290000	1160000	1060000	871000	1670000	1560000	1800000	2030000	1640000	1730000	4910000	4450000	4750000	C05908	C05908	ko01110//Biosynthesis of secondary metabolites;ko00941//Flavonoid biosynthesis;ko00942//Anthocyanin biosynthesis	Global and Overview;Biosynthesis of other secondary metabolites	Metabolism
pme0450	289	78.8	L-Epicatechin	Catechin derivatives	Negative	3.18	290.3	[M-H]-	9	9	9	9	14200	33400	26700	9	9	9	9	9	9	9	9	C09727	C09727	ko01110//Biosynthesis of secondary metabolites;ko00941//Flavonoid biosynthesis	Global and Overview;Biosynthesis of other secondary metabolites	Metabolism
pme0463	175	158.1	L-Theanine	Amino acids	Positive	1.13	174.1	[M+H]+	38800	54000	43400	54800	58600	37100	67000	85400	73300	57300	66600	53400	7260	53900	38300	C01047
pme0474	139	50.3	4-Hydroxybenzoic acid	Organic acids	Positive	3.07	138.032	[M+H]+	188000	207000	202000	278000	263000	158000	252000	375000	236000	93600	191000	134000	176000	63400	175000	C00156	C00156	ko01100//Metabolic pathways;ko01110//Biosynthesis of secondary metabolites;ko01120//Microbial metabolism in diverse environments;ko01220//Degradation of aromatic compounds;ko00360//Phenylalanine metabolism;ko00130//Ubiquinone and other terpenoidquinone biosynthesis	Metabolism of cofactors and vitamins;Global and Overview;Amino acid metabolism	Metabolism
pme0486	117	100	Methylmalonic acid	Organic acids	Negative	1.32	118.027	[M-H]-	11300000	10500000	10600000	10900000	10700000	10000000	11000000	10400000	8920000	10600000	15000000	12100000	6240000	6230000	6210000	C02170	C02170	ko00240//Pyrimidine metabolism;ko00280//Valine, leucine and isoleucine degradation;ko00640//Propanoate metabolism	Carbohydrate metabolism;Amino acid metabolism;Nucleotide metabolism	Metabolism
pme0491	138	94	6-hydroxynicotinic acid	Nicotinic acid derivatives	Negative	1.42	139	[M-H]-	261000	321000	321000	193000	9	108000	218000	389000	388000	260000	361000	279000	224000	285000	186000	C01020	C01020	ko01120//Microbial metabolism in diverse environments;ko00760//Nicotinate and nicotinamide metabolism	Metabolism of cofactors and vitamins;Global and Overview	Metabolism
pme0496	122	77.9	Nicotinic acid	Nicotinic acid derivatives	Negative	1.14	123	[M-H]-	425000	450000	476000	604000	482000	658000	384000	210000	426000	650000	753000	603000	167000	195000	206000	C00253	C00253	ko01100//Metabolic pathways;ko01110//Biosynthesis of secondary metabolites;ko01120//Microbial metabolism in diverse environments;ko00760//Nicotinate and nicotinamide metabolism;ko00960//Tropane, piperidine and pyridine alkaloid biosynthesis	Global and Overview;Metabolism of cofactors and vitamins;Biosynthesis of other secondary metabolites	Metabolism
pme0499	181	70.9	D-Sorbitol	Alcohols and polyols	Negative	0.74	182.079	[M-H]-	43900	50500	51500	56800	31300	56000	61900	64400	77400	39900	104000	48200	30200	41900	27300	C00794	C00794	ko01100//Metabolic pathways;ko02010//ABC transporters;ko00052//Galactose metabolism;ko00051//Fructose and mannose metabolism	Carbohydrate metabolism;Global and Overview;Membrane transport	Environmental Information Processing;Metabolism
pme0500	503.4	323.2	D(+)-Melezitose	Carbohydrates	Negative	0.79	504.169	[M-H]-	30100	28900	33700	23700	16300	20300	37700	52600	42400	31200	41900	23600	20900	21100	26600	-
pme0510	197.1	153	Gluconic acid	Carbohydrates	Positive	0.49	196.058	[M+H]+	21600	21200	20400	16900	21200	23000	18700	19300	19300	15500	16300	22600	16700	23300	17600	C00257	C00257	ko01100//Metabolic pathways;ko01110//Biosynthesis of secondary metabolites;ko01120//Microbial metabolism in diverse environments;ko01130//Biosynthesis of antibiotics;ko01200//Carbon metabolism;ko00030//Pentose phosphate pathway	Carbohydrate metabolism;Global and Overview	Metabolism
pme0513	151	70.8	Xylitol	Alcohols and polyols	Negative	0.77	152.069	[M-H]-	67000	89200	93400	100000	56000	102000	145000	110000	167000	112000	116000	89100	52100	67900	70900	C00379	C00379	ko01100//Metabolic pathways;ko02010//ABC transporters;ko00040//Pentose and glucuronate interconversions	Membrane transport;Global and Overview;Carbohydrate metabolism	Environmental Information Processing;Metabolism
pme0516	179.2	87	Inositol	Others	Negative	0.74	180.063	[M-H]-	1490000	1680000	1610000	2040000	1670000	1940000	1660000	1670000	2700000	1340000	1370000	1300000	1130000	1690000	1270000	C00137	C00137	ko01100//Metabolic pathways;ko01120//Microbial metabolism in diverse environments;ko01130//Biosynthesis of antibiotics;ko02010//ABC transporters;ko00052//Galactose metabolism;ko00053//Ascorbate and aldarate metabolism;ko00562//Inositol phosphate metabolism;ko04070//Phosphatidylinositol signaling system	Carbohydrate metabolism;Signal transduction;Membrane transport;Global and Overview	Metabolism;Environmental Information Processing
pme0519	341	58.8	D-(+)-Sucrose	Carbohydrates	Negative	0.78	342.116	[M-H]-	15600000	17300000	15800000	12100000	10400000	12700000	16700000	17400000	20800000	12800000	13400000	14700000	18000000	20900000	16100000	-
pme0543	160.1	116	Indole-5-carboxylic acid	Indole derivatives	Negative	4.32	161.048	[M-H]-	139000	186000	164000	133000	96500	177000	207000	91700	140000	105000	189000	91600	99400	286000	128000	-
pme1002	138.1	103	L-Tyramine	Amino acids	Positive	1.2	137.084	[M+H]+	9300000	13200000	12800000	12800000	19900000	16300000	27800000	11000000	16900000	5680000	10300000	7880000	10400000	12000000	8340000	C00483	C00483	ko01110//Biosynthesis of secondary metabolites;ko00350//Tyrosine metabolism;ko00950//Isoquinoline alkaloid biosynthesis	Biosynthesis of other secondary metabolites;Amino acid metabolism;Global and Overview	Metabolism
pme1008	216	170.1	3-Chloro-L-tyrosine	Amino acid derivatives	Positive	1.92	215.035	[M+H]+	71100	70600	70500	83200	58800	51800	67400	64500	9	28700	73800	39000	9	9	9	-
pme1011	121	104	Benzamidine	Others	Positive	1.31	120.069	[M+H]+	101000	129000	133000	120000	71900	138000	54400	73900	103000	46900	62300	69100	76500	71500	83400	C01784
pme1014	445.3	281	Menaquinone (K2)	Vitamins	Positive	10.71	444.303	[M+H]+	3070000	8290000	7450000	794000	613000	504000	761000	588000	436000	921000	477000	1000000	532000	623000	328000	C00828	C00828	ko01100//Metabolic pathways;ko01110//Biosynthesis of secondary metabolites;ko00130//Ubiquinone and other terpenoidquinone biosynthesis	Global and Overview;Metabolism of cofactors and vitamins	Metabolism
pme1055	207.1	144.1	L-Kynurenine	Amino acid derivatives	Negative	1.95	208.085	[M-H]-	15600	17700	15100	13200	21300	14600	11900	18500	14600	9100	13300	13600	14600	16500	13100	C00328	C00328	ko01100//Metabolic pathways;ko00380//Tryptophan metabolism	Amino acid metabolism;Global and Overview	Metabolism
pme1063	243.1	110	Uridine	Nucleotide and its derivates	Negative	1.19	244.07	[M-H]-	566000	749000	709000	658000	701000	715000	482000	473000	565000	823000	939000	713000	457000	578000	702000	C00299	C00299	ko01100//Metabolic pathways;ko00240//Pyrimidine metabolism	Nucleotide metabolism;Global and Overview	Metabolism
pme1086	306	143	Glutathione reduced form	Amino acid derivatives	Negative	1.14	307.084	[M-H]-	301000	340000	308000	1210000	1970000	1140000	1220000	949000	910000	1630000	1770000	1930000	2220000	1690000	845000	C00051	C00051	ko01100//Metabolic pathways;ko02010//ABC transporters;ko00270//Cysteine and methionine metabolism;ko00480//Glutathione metabolism	Amino acid metabolism;Global and Overview;Membrane transport;Metabolism of other amino acids	Metabolism;Environmental Information Processing
pme1094	116	58.9	L-Valine	Amino acids	Negative	0.93	117.079	[M-H]-	25000	30200	28900	33400	28600	23900	25700	46000	36800	19300	21800	26000	27200	27400	19400	C00183	C00183	ko01100//Metabolic pathways;ko01110//Biosynthesis of secondary metabolites;ko01130//Biosynthesis of antibiotics;ko01230//Biosynthesis of amino acids;ko02010//ABC transporters;ko00970//AminoacyltRNA biosynthesis;ko01210//2Oxocarboxylic acid metabolism;ko00460//Cyanoamino acid metabolism;ko00770//Pantothenate and CoA biosynthesis;ko00966//Glucosinolate biosynthesis;ko00290//Valine, leucine and isol…	Biosynthesis of other secondary metabolites;Amino acid metabolism;Global and Overview;Translation;Membrane transport;Metabolism of cofactors and vitamins;Metabolism of other amino acids	Metabolism;Environmental Information Processing;Genetic Information Processing
pme1097	134.1	134.1	Adenine	Nucleotide and its derivates	Negative	1.13	135.055	[M-H]-	1400000	1510000	1740000	1440000	1370000	1300000	1250000	1060000	1270000	2790000	2410000	2160000	828000	1040000	1840000	C00147	C00147	ko01100//Metabolic pathways;ko00230//Purine metabolism;ko00908//Zeatin biosynthesis	Global and Overview;Metabolism of terpenoids and polyketides;Nucleotide metabolism	Metabolism
pme1104	130.1	130.1	L-Isoleucine	Amino acids	Negative	1.23	131.095	[M-H]-	153000	147000	158000	226000	200000	191000	128000	161000	134000	119000	224000	172000	113000	157000	95500	C00407	C00407	ko01100//Metabolic pathways;ko01110//Biosynthesis of secondary metabolites;ko01130//Biosynthesis of antibiotics;ko01230//Biosynthesis of amino acids;ko02010//ABC transporters;ko00970//AminoacyltRNA biosynthesis;ko01210//2Oxocarboxylic acid metabolism;ko00460//Cyanoamino acid metabolism;ko00960//Tropane, piperidine and pyridine alkaloid biosynthesis;ko00966//Glucosinolate biosynthesis;ko00290//Val…	Global and Overview;Membrane transport;Metabolism of other amino acids;Translation;Amino acid metabolism;Biosynthesis of other secondary metabolites	Genetic Information Processing;Environmental Information Processing;Metabolism
pme1109	152	135.1	Guanine	Nucleotide and its derivates	Positive	1.15	151.049	[M+H]+	1710000	1920000	2100000	2170000	2040000	2250000	3320000	1200000	2460000	2330000	2440000	2240000	1470000	1840000	2000000	C00242	C00242	ko01100//Metabolic pathways;ko00230//Purine metabolism	Nucleotide metabolism;Global and Overview	Metabolism
pme1119	269.1	137	Inosine	Nucleotide and its derivates	Positive	0.8	268.081	[M+H]+	133000	327000	263000	183000	137000	144000	324000	252000	268000	309000	429000	143000	224000	282000	208000	C00294	C00294	ko01100//Metabolic pathways;ko00230//Purine metabolism	Nucleotide metabolism;Global and Overview	Metabolism
pme1162	169	122.8	Gallic acid	Benzoic acid derivatives	Negative	1.75	170.022	[M-H]-	57200	118000	82700	33400	134000	67600	56200	49700	63600	53000	122000	50800	38000	34700	155000	C01424	C01424	ko01120//Microbial metabolism in diverse environments	Global and Overview	Metabolism
pme1175	282.1	150.1	Guanosine	Nucleotide and its derivates	Negative	1.47	283.092	[M-H]-	2890000	3410000	3360000	4320000	3970000	4230000	2290000	2050000	2540000	5130000	5370000	3610000	1350000	1610000	2270000	C00387	C00387	ko01100//Metabolic pathways;ko00230//Purine metabolism	Nucleotide metabolism;Global and Overview	Metabolism
pme1181	266.1	150.1	Deoxyguanosine	Nucleotide and its derivates	Negative	1.69	267.097	[M-H]-	37200	45500	37800	57700	33300	36700	35500	42700	45400	26700	61800	44600	30200	17100	19900	C00330	C00330	ko01100//Metabolic pathways;ko00230//Purine metabolism	Nucleotide metabolism;Global and Overview	Metabolism
pme1194	228	112	Deoxycytidine	Nucleotide and its derivates	Positive	1.13	227.091	[M+H]+	105000	147000	175000	151000	129000	134000	121000	169000	191000	165000	244000	199000	202000	230000	143000	C00881	C00881	ko00240//Pyrimidine metabolism	Nucleotide metabolism	Metabolism
pme1201	273.1	167.1	Phloretin	Flavanone	Negative	5.52	274.084	[M-H]-	37300	44400	41500	27400	37800	27900	65100	55900	55000	33900	27100	26000	33900	41700	50700	C00774
pme1210	150	72.8	L-Methionine	Amino acids	Positive	1.18	149.051	[M+H]+	5870000	7250000	7380000	8560000	7400000	7840000	8210000	6640000	9950000	6210000	8480000	7310000	7240000	8590000	7720000	C00073	C00073	ko01100//Metabolic pathways;ko01110//Biosynthesis of secondary metabolites;ko01230//Biosynthesis of amino acids;ko00970//AminoacyltRNA biosynthesis;ko01210//2Oxocarboxylic acid metabolism;ko00270//Cysteine and methionine metabolism;ko00966//Glucosinolate biosynthesis	Translation;Global and Overview;Amino acid metabolism;Biosynthesis of other secondary metabolites	Genetic Information Processing;Metabolism
pme1218	124	77.8	2-Picolinic acid	Organic acids	Positive	1.21	123.032	[M+H]+	855000	1140000	1180000	1470000	1150000	1850000	1090000	603000	1200000	1340000	1620000	1210000	563000	606000	643000	C10164	C10164	ko01100//Metabolic pathways;ko00380//Tryptophan metabolism	Amino acid metabolism;Global and Overview	Metabolism
pme1225	219.1	144.1	5-Hydroxy-L-tryptophan	Amino acid derivatives	Negative	1.47	220.085	[M-H]-	41300	44800	43700	52200	46200	39800	37100	31500	39500	38900	31500	38300	41700	33400	50700	C00643	C00643	ko01100//Metabolic pathways;ko00380//Tryptophan metabolism	Amino acid metabolism;Global and Overview	Metabolism
pme1239	320.4	128.1	S-(methyl)glutathione	Amino acid derivatives	Negative	1.24	321.1	[M-H]-	649000	808000	780000	742000	838000	717000	628000	866000	669000	508000	737000	802000	818000	613000	776000	C11347
pme1281	246	78.9	Pyridoxal 5'-phosphate	Vitamins	Negative	2.16	247.025	[M-H]-	68400	60000	68200	121000	112000	90200	109000	65000	123000	79300	125000	71700	55100	85400	77100	C00018	C00018	ko01100//Metabolic pathways;ko00730//Thiamine metabolism;ko00750//Vitamin B6 metabolism	Global and Overview;Metabolism of cofactors and vitamins	Metabolism
pme1286	385	136.1	S-(5'-Adenosy)-L-homocysteine	Amino acid derivatives	Positive	1.31	384.122	[M+H]+	147000	298000	298000	178000	170000	166000	317000	310000	141000	302000	317000	336000	338000	242000	275000	C00021	C00021	ko01100//Metabolic pathways;ko01230//Biosynthesis of amino acids;ko00270//Cysteine and methionine metabolism	Global and Overview;Amino acid metabolism	Metabolism
pme1292	167.1	122.1	Homogentisic acid	Organic acids	Negative	2.26	168.042	[M-H]-	873000	1210000	1240000	2270000	1700000	1270000	847000	2340000	1010000	944000	1280000	1250000	1030000	1320000	879000	C00544	C00544	ko01100//Metabolic pathways;ko01120//Microbial metabolism in diverse environments;ko00350//Tyrosine metabolism;ko00130//Ubiquinone and other terpenoidquinone biosynthesis	Amino acid metabolism;Metabolism of cofactors and vitamins;Global and Overview	Metabolism
pme1294	283	151.1	Xanthosine	Nucleotide and its derivates	Negative	1.77	284.076	[M-H]-	553000	645000	576000	686000	880000	591000	697000	444000	484000	772000	825000	772000	389000	326000	363000	C01762	C01762	ko01100//Metabolic pathways;ko01110//Biosynthesis of secondary metabolites;ko00230//Purine metabolism;ko00232//Caffeine metabolism	Biosynthesis of other secondary metabolites;Global and Overview;Nucleotide metabolism	Metabolism
pme1310	235.1	130.1	N'-Formylkynurenine	Amino acid derivatives	Negative	2.05	236.08	[M-H]-	13900	17900	14100	14200	15000	13900	18300	23400	14600	10100	16300	14700	11900	14600	8870	C02700
pme1363	662.1	540.1	Nicotinic acid adenine dinucleotide	Nucleotide and its derivates	Negative	1.13	663.109	[M-H]-	1570000	1570000	1720000	1460000	1680000	1260000	2130000	1870000	1930000	1210000	1550000	1340000	2050000	2260000	1910000	C00003	C00857	ko01100//Metabolic pathways;ko00760//Nicotinate and nicotinamide metabolism	Metabolism of cofactors and vitamins;Global and Overview	Metabolism
pme1368	128	126	L-Pipecolic acid	Amino acid derivatives	Negative	1.15	129.079	[M-H]-	27000	21200	26500	30100	26600	22100	28100	36100	17500	21700	24900	21300	28800	30400	19000	C00408	C00408	ko01100//Metabolic pathways;ko01110//Biosynthesis of secondary metabolites;ko00310//Lysine degradation;ko00960//Tropane, piperidine and pyridine alkaloid biosynthesis	Global and Overview;Biosynthesis of other secondary metabolites;Amino acid metabolism	Metabolism
pme1373	306	78.8	2'-Deoxycytidine-5'-monophosphate	Nucleotide and its derivates	Negative	1.2	307.057	[M-H]-	9	9	9	11500	25800	19300	16300	11100	9	16600	10400	18400	21500	19200	10600	C00239	C00239	ko01100//Metabolic pathways;ko00240//Pyrimidine metabolism	Global and Overview;Nucleotide metabolism	Metabolism
pme1378	282.1	150.1	1-Methyladenosine	Nucleotide and its derivates	Positive	2.31	281.112	[M+H]+	58300	79100	75100	100000	87400	61200	41900	62100	39700	97100	109000	52400	40100	48200	54900	C02494
pme1383	170.1	134.1	Pyridoxine	Vitamins	Positive	1.11	169.074	[M+H]+	729000	881000	910000	1770000	1630000	1920000	907000	478000	659000	1200000	1190000	1170000	470000	548000	635000	C00314	C00314	ko01100//Metabolic pathways;ko01120//Microbial metabolism in diverse environments;ko00750//Vitamin B6 metabolism	Metabolism of cofactors and vitamins;Global and Overview	Metabolism
pme1398	465.1	303.1	Delphinidin 3-O-glucoside (Mirtillin)	Anthocyanins	Positive	2.38	465.1	Protonated	2620000	4200000	4990000	4970000	6100000	2530000	6680000	6880000	7220000	2740000	1700000	3020000	3330000	3410000	4250000	C12138	C12138	ko00942//Anthocyanin biosynthesis	Biosynthesis of other secondary metabolites	Metabolism
pme1399	355.2	178.9	Xanthohumol	Flavanone	Positive	8.24	354.147	[M+H]+	4520	3560	1520	9	9	2590	4120	4980	9	9	3840	2300	900	9	2340	C16417	C16417	ko00941//Flavonoid biosynthesis	Biosynthesis of other secondary metabolites	Metabolism
pme1416	159.2	116.9	L-Tryptamine	Tryptamine derivatives	Negative	2.66	160.1	[M-H]-	158000	176000	176000	200000	183000	161000	208000	217000	134000	132000	160000	176000	185000	151000	187000	C00398	C00398	ko01100//Metabolic pathways;ko01110//Biosynthesis of secondary metabolites;ko00380//Tryptophan metabolism;ko00901//Indole alkaloid biosynthesis	Biosynthesis of other secondary metabolites;Amino acid metabolism;Global and Overview	Metabolism
pme1422	149.1	105	Hydrocinnamic acid	Hydroxycinnamoyl derivatives	Negative	5.27	150.068	[M-H]-	52300	51700	42500	37600	20500	40300	27200	50500	87300	74700	52400	47600	32900	63200	29700	C05629	C05629	ko01120//Microbial metabolism in diverse environments;ko01220//Degradation of aromatic compounds;ko00360//Phenylalanine metabolism	Global and Overview;Amino acid metabolism	Metabolism
pme1424	177.1	177.1	Coniferylaldehyde	Hydroxycinnamoyl derivatives	Negative	4.59	178.063	[M-H]-	240000	268000	296000	241000	196000	228000	278000	210000	336000	327000	333000	213000	243000	333000	230000	C02666	C02666	ko01100//Metabolic pathways;ko01110//Biosynthesis of secondary metabolites;ko00940//Phenylpropanoid biosynthesis	Global and Overview;Biosynthesis of other secondary metabolites	Metabolism
pme1434	371.1	209.2	Syringin	Hydroxycinnamoyl derivatives	Negative	2.76	372.142	[M-H]-	18800000	20900000	17400000	15500000	15900000	11100000	15500000	9570000	12000000	23800000	14300000	14500000	29800000	16900000	22300000	C01533	C01533	ko00940//Phenylpropanoid biosynthesis	Biosynthesis of other secondary metabolites	Metabolism
pme1439	165	147.1	p-Coumaric acid	Hydroxycinnamoyl derivatives	Positive	3.79	164.047	[M+H]+	651000	775000	572000	1320000	817000	673000	472000	928000	428000	622000	1190000	734000	678000	644000	856000	C00811	C00811	ko01100//Metabolic pathways;ko01110//Biosynthesis of secondary metabolites;ko00940//Phenylpropanoid biosynthesis;ko01220//Degradation of aromatic compounds;ko00350//Tyrosine metabolism;ko00360//Phenylalanine metabolism;ko00130//Ubiquinone and other terpenoidquinone biosynthesis	Biosynthesis of other secondary metabolites;Amino acid metabolism;Global and Overview;Metabolism of cofactors and vitamins	Metabolism
pme1473	296	134	5'-Deoxy-5'-(methylthio)adenosine	Nucleotide and its derivates	Negative	2.85	297.09	[M-H]-	4020000	5020000	4700000	3590000	2470000	4600000	4180000	5220000	4890000	4720000	6160000	5850000	5630000	4690000	5280000	C00170	C00170	ko01100//Metabolic pathways;ko00270//Cysteine and methionine metabolism;ko00908//Zeatin biosynthesis	Amino acid metabolism;Metabolism of terpenoids and polyketides;Global and Overview	Metabolism
pme1486	457.2	169.1	Epigallate catechin gallate (EGCG)	Catechin derivatives	Negative	3.28	458.085	[M-H]-	517000	452000	371000	452000	548000	480000	512000	363000	422000	445000	688000	357000	391000	362000	445000	C09731
pme1496	267.1	252.1	Formononetin (4'-O-methyldaidzein)	Isoflavone	Negative	6.27	268.074	[M-H]-	10200	13200	12400	14600	14600	14300	12400	12500	13100	13200	13000	11300	10800	12300	11100	C00858	C00858	ko01110//Biosynthesis of secondary metabolites;ko00943//Isoflavonoid biosynthesis	Global and Overview;Biosynthesis of other secondary metabolites	Metabolism
pme1518	403.1	373.1	Nobiletin	Flavone	Positive	7.02	402.132	[M+H]+	47600	46400	40400	41800	26000	34900	48700	47400	59100	32700	32300	35800	25700	42700	38000	C10112
pme1521	303.1	125.1	Dihydroquercetin (Taxifolin)	Flavonol	Negative	4.09	304.058	[M-H]-	124000	93200	84800	87200	56600	87900	139000	232000	116000	41700	70600	50500	68900	52800	47800	C01617	C01617	ko01100//Metabolic pathways;ko01110//Biosynthesis of secondary metabolites;ko00941//Flavonoid biosynthesis	Global and Overview;Biosynthesis of other secondary metabolites	Metabolism
pme1537	307	248.1	(+)-Gallocatechin (GC)	Catechin derivatives	Positive	2.34	306.074	[M+H]+	170000	263000	210000	261000	317000	264000	236000	258000	253000	152000	130000	156000	286000	292000	347000	C12127	C12127	ko01110//Biosynthesis of secondary metabolites;ko00941//Flavonoid biosynthesis	Biosynthesis of other secondary metabolites;Global and Overview	Metabolism
pme1540	625.2	317.1	Isorhamnetin 3-O-neohesperidoside	Flavonol	Positive	3.54	624.169	[M+H]+	247000	336000	274000	196000	176000	292000	672000	756000	693000	64700	19500	65000	197000	105000	123000	-
pme1550	373.1	373.1	Tangeretin	Flavone	Positive	7.5	372.121	[M+H]+	34800	24400	23500	27500	23000	22200	36100	24600	31500	21000	18500	20200	24500	37100	22400	C10190
pme1562	441.3	289.1	Epicatechin gallate (ECG)	Catechin derivatives	Negative	3.83	442.3	[M-H]-	35300	47300	31800	35600	41900	50200	34900	33700	41300	30500	84400	20500	28700	17700	24800	-
pme1580	287.1	135.1	Eriodictyol	Flavanone	Negative	5.03	288.063	[M-H]-	6540	8320	7980	9180	5620	3870	6470	5360	8100	6550	9030	4570	7100	9960	13000	C05631	C05631	ko01110//Biosynthesis of secondary metabolites;ko00941//Flavonoid biosynthesis	Biosynthesis of other secondary metabolites;Global and Overview	Metabolism
pme1588	315.1	300.1	Isorhamnetin	Flavonol	Negative	5.81	316.058	[M-H]-	86900	90100	90700	15600	17200	15100	63600	248000	92000	25400	34200	19900	27200	37300	61600	C10084
pme1598	463.1	301.1	Hesperetin 5-O-glucoside	Flavanone	Negative	3.81	464.132	[M-H]-	1140000	1380000	1430000	426000	470000	362000	944000	1230000	986000	684000	705000	929000	631000	817000	1290000	-
pme1600	303.1	167.1	7-O-Methyleriodictyol	Flavanone	Positive	6.07	302.079	[M+H]+	9040	7190	4540	5220	4900	6030	9	4280	5490	4200	9	4180	2600	5990	6540	-
pme1637	179.1	146.1	Coniferyl alcohol	Hydroxycinnamoyl derivatives	Negative	3.86	180.079	[M-H]-	40500	48800	41300	33400	31000	43600	35800	23300	45200	52700	39000	25200	25800	34800	32500	C00590	C00590	ko01100//Metabolic pathways;ko01110//Biosynthesis of secondary metabolites;ko00940//Phenylpropanoid biosynthesis	Biosynthesis of other secondary metabolites;Global and Overview	Metabolism
pme1646	357.1	136.1	Pinoresinol	Hydroxycinnamoyl derivatives	Negative	5.36	358.142	[M-H]-	52100	74900	66900	57200	62200	65500	85700	49800	85500	105000	83200	58900	28000	38300	38800	-
pme1684	179.1	161.1	D-(+)-Glucono-1,5-lactone	Carbohydrates	Positive	0.76	178.048	[M+H]+	41400	61700	43600	46100	42200	30400	75900	52200	98600	70600	80600	87200	74000	90000	66100	C00198	C00198	ko01100//Metabolic pathways;ko01110//Biosynthesis of secondary metabolites;ko01120//Microbial metabolism in diverse environments;ko01130//Biosynthesis of antibiotics;ko01200//Carbon metabolism;ko00030//Pentose phosphate pathway	Global and Overview;Carbohydrate metabolism	Metabolism
pme1691	147.1	88	Acetylcholine	Cholines	Positive	0.77	146.118	[M+H]+	679000	786000	476000	741000	605000	604000	715000	517000	692000	610000	763000	769000	641000	778000	394000	C08201	C01996	ko00564//Glycerophospholipid metabolism	Lipid metabolism	Metabolism
pme1695	223.1	149.1	Sinapic acid	Hydroxycinnamoyl derivatives	Negative	4.01	224.069	[M-H]-	1250000	1710000	2150000	1080000	860000	1500000	1330000	1020000	1850000	1410000	1780000	1250000	2140000	1910000	1610000	C00482	C00482	ko01100//Metabolic pathways;ko01110//Biosynthesis of secondary metabolites;ko00940//Phenylpropanoid biosynthesis	Biosynthesis of other secondary metabolites;Global and Overview	Metabolism
pme1709	138.1	78	Nicotinic Acid Methyl Ester (Methyl Nicotinate)	Vitamins	Positive	3.69	137.048	[M+H]+	928000	889000	978000	414000	313000	450000	711000	387000	609000	198000	187000	163000	167000	158000	161000	-
pme1711	117.1	99.9	3-Hydroxy-3-methyl butyric acid	Organic acids	Negative	2.09	118.063	[M-H]-	506000	466000	454000	538000	437000	534000	473000	412000	636000	392000	521000	400000	377000	508000	455000	-
pme1712	275	257.1	L-Saccharopine	Amino acid derivatives	Negative	0.71	276.132	[M-H]-	44000	48300	42900	81600	78100	50600	28800	29900	36500	24300	43100	51300	28500	50600	26400	C00449	C00449	ko01100//Metabolic pathways;ko01110//Biosynthesis of secondary metabolites;ko01130//Biosynthesis of antibiotics;ko01230//Biosynthesis of amino acids;ko00310//Lysine degradation;ko00300//Lysine biosynthesis	Global and Overview;Amino acid metabolism	Metabolism
pme1724	137.1	77	Methyl benzoate	Benzoic acid derivatives	Positive	6.2	136.052	[M+H]+	16300	11700	10900	12000	9	5490	9	9	10300	14900	10100	11800	9790	9	9	C20645
pme1730	117	99.8	D-Erythronolactone	Organic acids	Negative	0.73	118.027	[M-H]-	138000	133000	140000	154000	167000	143000	155000	105000	112000	88600	198000	117000	104000	107000	117000	-
pme1777	611	287.7	Cyanidin 3,5-O-diglucoside (Cyanin)	Anthocyanins	Positive	2.15	611	Protonated	626000	1780000	1890000	2290000	2740000	2080000	2340000	1630000	2210000	1280000	1280000	682000	937000	1140000	557000	C08639	C08639	ko00942//Anthocyanin biosynthesis	Biosynthesis of other secondary metabolites	Metabolism
pme1806	367	179.1	Chlorogenic acid methyl ester	Quinate and its derivatives	Negative	3.67	368.111	[M-H]-	792000	929000	828000	930000	989000	1250000	1160000	626000	594000	849000	1010000	840000	633000	746000	827000	-
pme1814	153	108.1	2,5-dihydroxybenzoic acid (Gentisic acid)	Benzoic acid derivatives	Negative	2.57	154.027	[M-H]-	111000	129000	118000	115000	97800	127000	69200	65400	53800	143000	178000	149000	102000	139000	141000	C00628	C00628	ko01100//Metabolic pathways;ko01120//Microbial metabolism in diverse environments;ko00350//Tyrosine metabolism	Amino acid metabolism;Global and Overview	Metabolism
pme1816	353	191.1	Neochlorogenic acid (5-O-Caffeoylquinic acid)	Quinate and its derivatives	Negative	2.58	354.095	[M-H]-	5200000	5050000	4800000	4150000	4470000	4840000	2340000	1670000	1040000	8940000	9060000	6580000	8040000	6590000	8260000	C17147
pme1820	151	107.1	p–Hydroxyphenyl acetic acid	Organic acids	Negative	3.25	152.047	[M-H]-	4380000	5160000	5460000	3180000	2490000	3150000	3470000	2780000	2040000	4630000	5710000	3390000	4500000	5310000	8050000	C00642	C00642	ko01120//Microbial metabolism in diverse environments;ko01220//Degradation of aromatic compounds;ko00350//Tyrosine metabolism;ko00360//Phenylalanine metabolism	Global and Overview;Amino acid metabolism	Metabolism
pme1824	153.1	109.1	Protocatechuic acid	Catechin derivatives	Negative	2.55	154.027	[M-H]-	162000	185000	200000	170000	116000	170000	174000	56300	224000	189000	232000	190000	134000	223000	224000	C00230	C00230	ko01100//Metabolic pathways;ko01110//Biosynthesis of secondary metabolites;ko01120//Microbial metabolism in diverse environments;ko01130//Biosynthesis of antibiotics;ko01220//Degradation of aromatic compounds;ko00400//Phenylalanine, tyrosine and tryptophan biosynthesis	Global and Overview;Amino acid metabolism	Metabolism
pme1828	118.1	118.1	Betaine	Alkaloids	Positive	0.78	117.079	[M+H]+	1040000	1510000	1330000	1410000	1440000	1580000	946000	1610000	1350000	954000	1030000	1200000	1380000	1410000	1270000	C00719	C00719	ko01100//Metabolic pathways;ko02010//ABC transporters;ko00260//Glycine, serine and threonine metabolism	Membrane transport;Global and Overview;Amino acid metabolism	Environmental Information Processing;Metabolism
pme1830	117	99.9	Succinic acid	Organic acids	Negative	1.31	118.027	[M-H]-	12300000	11200000	11700000	11900000	11400000	10600000	12200000	11000000	9840000	11800000	16000000	13100000	6850000	6620000	6840000	C00042	C00042	ko01100//Metabolic pathways;ko01110//Biosynthesis of secondary metabolites;ko01120//Microbial metabolism in diverse environments;ko01130//Biosynthesis of antibiotics;ko01200//Carbon metabolism;ko01220//Degradation of aromatic compounds;ko00350//Tyrosine metabolism;ko00760//Nicotinate and nicotinamide metabolism;ko00360//Phenylalanine metabolism;ko00250//Alanine, aspartate and glutamate metabolism…	Energy metabolism;Amino acid metabolism;Carbohydrate metabolism;Global and Overview;Metabolism of cofactors and vitamins	Metabolism
pme1846	179	70.9	D(+)-Glucose	Carbohydrates	Negative	0.76	180.063	[M-H]-	5460000	6670000	6510000	6800000	3790000	6350000	8470000	7130000	10200000	4970000	7210000	6050000	4030000	5700000	4470000	C00031	C00031	ko01100//Metabolic pathways;ko01110//Biosynthesis of secondary metabolites;ko01130//Biosynthesis of antibiotics;ko02010//ABC transporters;ko00052//Galactose metabolism;ko00500//Starch and sucrose metabolism;ko00030//Pentose phosphate pathway;ko00520//Amino sugar and nucleotide sugar metabolism;ko00901//Indole alkaloid biosynthesis;ko00010//Glycolysis / Gluconeogenesis	Membrane transport;Global and Overview;Biosynthesis of other secondary metabolites;Carbohydrate metabolism	Metabolism;Environmental Information Processing
pme1851	130.1	88	Creatine	Organic acids	Negative	0.93	131.07	[M-H]-	2620000	2970000	2840000	1640000	1300000	947000	1800000	4800000	3250000	2560000	2890000	2680000	2400000	2410000	3020000	C00300	C00300	ko01100//Metabolic pathways;ko00330//Arginine and proline metabolism;ko00260//Glycine, serine and threonine metabolism	Global and Overview;Amino acid metabolism	Metabolism
pme1872	114.1	85.9	L-Proline	Amino acids	Negative	0.79	115.063	[M-H]-	49500	50700	47500	58100	24500	55200	60400	65000	67900	45900	65500	46100	41200	44100	40100	C00148	C00148	ko01100//Metabolic pathways;ko01110//Biosynthesis of secondary metabolites;ko01130//Biosynthesis of antibiotics;ko01230//Biosynthesis of amino acids;ko02010//ABC transporters;ko00970//AminoacyltRNA biosynthesis;ko00330//Arginine and proline metabolism;ko00332//Carbapenem biosynthesis	Biosynthesis of other secondary metabolites;Amino acid metabolism;Membrane transport;Translation;Global and Overview	Genetic Information Processing;Environmental Information Processing;Metabolism
pme1936	114.1	114	Creatinine	Organic acids	Positive	0.57	113.059	[M+H]+	450000	696000	753000	474000	451000	628000	700000	714000	733000	608000	669000	756000	724000	691000	659000	C00791	C00791	ko01100//Metabolic pathways;ko00330//Arginine and proline metabolism	Global and Overview;Amino acid metabolism	Metabolism
pme1944	183.1	111	D-Mannitol	Alcohols and polyols	Positive	0.79	182.079	[M+H]+	483000	568000	637000	417000	394000	424000	673000	705000	629000	780000	668000	697000	518000	506000	570000	C00392	C00392	ko02010//ABC transporters;ko00051//Fructose and mannose metabolism	Carbohydrate metabolism;Membrane transport	Environmental Information Processing;Metabolism
pme1949	375	255.2	Riboflavin	Vitamins	Negative	3.17	376.138	[M-H]-	367000	446000	510000	424000	303000	360000	827000	681000	887000	428000	599000	347000	236000	410000	300000	C00255	C00255	ko01100//Metabolic pathways;ko01110//Biosynthesis of secondary metabolites;ko00740//Riboflavin metabolism	Global and Overview;Metabolism of cofactors and vitamins	Metabolism
pme1966	126	126	2-Aminoethanesulfonic acid	Organic acids	Positive	0.84	125.015	[M+H]+	136000	123000	105000	142000	187000	121000	99100	66500	162000	150000	119000	120000	84200	152000	125000	C00245	C00245	ko01100//Metabolic pathways;ko02010//ABC transporters;ko00430//Taurine and hypotaurine metabolism;ko00920//Sulfur metabolism	Membrane transport;Metabolism of other amino acids;Global and Overview;Energy metabolism	Metabolism;Environmental Information Processing
pme1980	175.1	83.1	Suberic acid	Organic acids	Positive	3.7	174.089	[M+H]+	201000	188000	194000	261000	229000	155000	237000	279000	225000	165000	153000	201000	199000	136000	150000	C08278
pme1988	90	71.8	L-Alanine	Amino acids	Positive	0.78	89.048	[M+H]+	2570000	2650000	2490000	2520000	2870000	3450000	2300000	2210000	2560000	2010000	2300000	2360000	2740000	3670000	2250000	C00041	C00041	ko01100//Metabolic pathways;ko01120//Microbial metabolism in diverse environments;ko01230//Biosynthesis of amino acids;ko02010//ABC transporters;ko00970//AminoacyltRNA biosynthesis;ko01200//Carbon metabolism;ko00270//Cysteine and methionine metabolism;ko00250//Alanine, aspartate and glutamate metabolism;ko00430//Taurine and hypotaurine metabolism;ko00710//Carbon fixation in photosynthetic organis…	Amino acid metabolism;Folding, sorting and degradation;Energy metabolism;Membrane transport;Metabolism of other amino acids;Translation;Global and Overview	Genetic Information Processing;Environmental Information Processing;Metabolism
pme2009	149	72.8	L-(+)-Tartaric acid	Organic acids	Negative	1.08	150.016	[M-H]-	21500	45400	20300	31000	30100	34500	20700	37200	46800	18000	46900	29100	45700	54300	62700	-
pme2019	149	58.9	DL-Arabinose	Carbohydrates	Negative	0.77	150.053	[M-H]-	1120000	1380000	1600000	1610000	770000	1300000	1770000	1880000	2210000	1050000	1790000	1440000	791000	1120000	653000	-
pme2033	133	70.8	L(-)-Malic acid	Organic acids	Negative	0.97	134.022	[M-H]-	10100000	12900000	12300000	9490000	7650000	9180000	13200000	16800000	17400000	12300000	11900000	11500000	6090000	6800000	6200000	C00497	C00497	ko00650//Butanoate metabolism	Carbohydrate metabolism	Metabolism
pme2036	191	85	Quinic acid	Quinate and its derivatives	Negative	1.13	192.063	[M-H]-	872000	829000	690000	1150000	813000	831000	1220000	833000	1080000	459000	1030000	511000	617000	877000	857000	C00296	C00296	ko00400//Phenylalanine, tyrosine and tryptophan biosynthesis	Amino acid metabolism	Metabolism
pme2046	170	96	3-N-Methyl-L-histidine	Amino acid derivatives	Positive	0.67	169.181	[M+H]+	98600	110000	97600	122000	79800	162000	80400	95700	173000	112000	121000	103000	113000	131000	111000	-
pme2049	103	56.8	2-Hydroxybutanoic acid	Organic acids	Negative	1.57	104.047	[M-H]-	574000	625000	550000	942000	1060000	684000	1680000	749000	806000	294000	253000	294000	237000	247000	292000	C05984	C05984	ko00640//Propanoate metabolism	Carbohydrate metabolism	Metabolism
pme2050	191	131	Citric acid	Organic acids	Negative	0.84	192.027	[M-H]-	21700000	26300000	25800000	26500000	18400000	22200000	39300000	21900000	35900000	15800000	27800000	18600000	20100000	22500000	21100000	C00158	C00158	ko01100//Metabolic pathways;ko01110//Biosynthesis of secondary metabolites;ko01120//Microbial metabolism in diverse environments;ko01130//Biosynthesis of antibiotics;ko01230//Biosynthesis of amino acids;ko01210//2Oxocarboxylic acid metabolism;ko01200//Carbon metabolism;ko00250//Alanine, aspartate and glutamate metabolism;ko00630//Glyoxylate and dicarboxylate metabolism;ko00020//Citrate cycle (TCA…	Global and Overview;Carbohydrate metabolism;Amino acid metabolism	Metabolism
pme2108	163	103	L-Carnitine	Others	Positive	0.7	162.113	[M+H]+	156000	193000	264000	283000	186000	340000	137000	145000	296000	165000	177000	180000	144000	323000	158000	C00318
pme2111	175	87	L-ascorbate	Vitamins	Negative	0.99	176.12	[M-H]-	1430000	1500000	1220000	1250000	1720000	1980000	1900000	1690000	2080000	2340000	2290000	2690000	3140000	3310000	2390000	C00072	C00072	ko01100//Metabolic pathways;ko01110//Biosynthesis of secondary metabolites;ko01120//Microbial metabolism in diverse environments;ko00480//Glutathione metabolism;ko00053//Ascorbate and aldarate metabolism	Carbohydrate metabolism;Global and Overview;Metabolism of other amino acids	Metabolism
pme2122	112.1	94.6	Histamine	Amino acid derivatives	Positive	0.63	111.08	[M+H]+	568000	718000	740000	1060000	910000	994000	698000	583000	589000	1110000	1070000	1010000	392000	511000	467000	C00388	C00388	ko01100//Metabolic pathways;ko01110//Biosynthesis of secondary metabolites;ko00340//Histidine metabolism	Global and Overview;Amino acid metabolism	Metabolism
pme2129	131.1	68.9	(S)-(-)-2-Hydroxyisocaproic acid	Organic acids	Negative	3.51	132.079	[M-H]-	171000	203000	192000	168000	139000	170000	246000	173000	206000	185000	169000	212000	145000	183000	138000	-
pme2134	121	71	DL-threitol	Alcohols and polyols	Negative	0.85	122.058	[M-H]-	110000	174000	183000	175000	120000	147000	120000	182000	198000	196000	155000	213000	111000	150000	147000	-
pme2165	155	111	Orotic acid	Vitamins	Negative	1.08	156.017	[M-H]-	269000	291000	289000	356000	330000	301000	411000	215000	349000	150000	269000	171000	270000	334000	322000	C00295	C00295	ko01100//Metabolic pathways;ko00240//Pyrimidine metabolism	Global and Overview;Nucleotide metabolism	Metabolism
pme2169	115	97.9	Fumaric acid	Organic acids	Negative	1.11	116.011	[M-H]-	4290000	3230000	3720000	3220000	2440000	4300000	2670000	4590000	5030000	3490000	3760000	4040000	2120000	2070000	1840000	C00122	C00122	ko01100//Metabolic pathways;ko01110//Biosynthesis of secondary metabolites;ko01120//Microbial metabolism in diverse environments;ko01130//Biosynthesis of antibiotics;ko01200//Carbon metabolism;ko01220//Degradation of aromatic compounds;ko00350//Tyrosine metabolism;ko00760//Nicotinate and nicotinamide metabolism;ko00360//Phenylalanine metabolism;ko00250//Alanine, aspartate and glutamate metabolism…	Global and Overview;Metabolism of cofactors and vitamins;Energy metabolism;Carbohydrate metabolism;Amino acid metabolism	Metabolism
pme2181	513.2	453.2	Nomilin	Terpenoids	Negative	6.74	514.22	[M-H]-	14600	18000	13800	15200	15900	16800	3870	9970	14300	11200	18900	15800	7070	6000	8730	C08773
pme2237	181.1	70.8	Dulcitol	Alcohols and polyols	Negative	0.75	182.079	[M-H]-	40800	56600	51100	66800	33900	50400	55600	70400	75800	44500	103000	48000	32100	33100	32700	C01697	C01697	ko01100//Metabolic pathways;ko00052//Galactose metabolism	Global and Overview;Carbohydrate metabolism	Metabolism
pme2241	129	84.9	Citraconic acid	Organic acids	Negative	1.65	130.027	[M-H]-	103000	84300	157000	96300	93800	131000	144000	89500	9	62000	216000	56000	9	63000	138000	C02226	C02226	ko01100//Metabolic pathways;ko01210//2Oxocarboxylic acid metabolism;ko00290//Valine, leucine and isoleucine biosynthesis;ko00660//C5Branched dibasic acid metabolism	Global and Overview;Carbohydrate metabolism;Amino acid metabolism	Metabolism
pme2253	177.1	74.8	L-Gulonic-γ-lactone	Carbohydrates	Negative	0.81	178.048	[M-H]-	150000	152000	177000	105000	125000	121000	224000	274000	259000	195000	162000	196000	153000	148000	182000	C01040	C01040	ko01100//Metabolic pathways;ko00053//Ascorbate and aldarate metabolism	Global and Overview;Carbohydrate metabolism	Metabolism
pme2256	151.1	70.8	D-Arabitol	Alcohols and polyols	Negative	0.73	152.069	[M-H]-	44400	50600	51300	41200	53200	86800	36000	40800	81900	40200	27400	29800	36300	56900	26700	C01904	C01904	ko01100//Metabolic pathways;ko00040//Pentose and glucuronate interconversions	Global and Overview;Carbohydrate metabolism	Metabolism
pme2266	245.1	227.1	Biotin	Vitamins	Positive	3.32	244.088	[M+H]+	458000	700000	576000	863000	652000	836000	665000	389000	821000	596000	540000	483000	350000	371000	310000	C00120	C00120	ko01100//Metabolic pathways;ko02010//ABC transporters;ko00780//Biotin metabolism	Metabolism of cofactors and vitamins;Membrane transport;Global and Overview	Metabolism;Environmental Information Processing
pme2268	138	137.9	Trigonelline	Alkaloids	Positive	0.79	137.048	[M+H]+	6560000	7920000	7780000	9130000	5680000	11800000	5540000	5090000	16600000	6440000	5860000	5400000	5510000	7490000	8260000	C01004	C01004	ko00760//Nicotinate and nicotinamide metabolism	Metabolism of cofactors and vitamins	Metabolism
pme2277	152	108.1	3-Aminosalicylic acid	Organic acids	Negative	1.34	153.043	[M-H]-	703000	1070000	1060000	689000	483000	476000	881000	1820000	1680000	909000	771000	938000	1090000	1200000	847000	-
pme2282	364	152.1	Guanosine monophosphate	Nucleotide and its derivates	Positive	1.19	363.058	[M+H]+	28400	23900	38500	36500	51500	21000	54000	27700	27400	21800	23200	35300	48700	14800	9	-	C00144	ko01100//Metabolic pathways;ko00230//Purine metabolism	Nucleotide metabolism;Global and Overview	Metabolism
pme2289	287.2	143.4	Vitamin A	Vitamins	Positive	10.93	286.23	[M+H]+	20100	15600	20600	15600	18500	19300	20600	21000	17500	22500	19500	27800	17900	11800	17800	C00473	C00473	ko01100//Metabolic pathways	Global and Overview	Metabolism
pme2292	89	71.9	Putrescine	Phenolamides	Positive	0.64	88.1	[M+H]+	404000	399000	450000	480000	476000	460000	410000	332000	429000	311000	311000	440000	512000	548000	496000	C00134	C00134	ko01100//Metabolic pathways;ko01110//Biosynthesis of secondary metabolites;ko01130//Biosynthesis of antibiotics;ko02010//ABC transporters;ko00330//Arginine and proline metabolism;ko00480//Glutathione metabolism;ko00960//Tropane, piperidine and pyridine alkaloid biosynthesis	Metabolism of other amino acids;Membrane transport;Global and Overview;Biosynthesis of other secondary metabolites;Amino acid metabolism	Metabolism;Environmental Information Processing
pme2362	151	105	Mandelic acid	Organic acids	Negative	2.91	152.047	[M-H]-	101000	149000	96100	157000	168000	84600	85200	229000	95400	134000	99000	144000	116000	83700	69500	C01984	C01984	ko01120//Microbial metabolism in diverse environments	Global and Overview	Metabolism
pme2366	122.1	105	Phenethylamine	Others	Positive	2.39	121.089	[M+H]+	1780000	2630000	2520000	2610000	1560000	3260000	1130000	2560000	1690000	3080000	3870000	2770000	2830000	2380000	2820000	C05332	C05332	ko00360//Phenylalanine metabolism	Amino acid metabolism	Metabolism
pme2380	145	80.8	A-Ketoglutaric acid	Organic acids	Negative	1.13	146.022	[M-H]-	25200	22500	28300	34200	72500	61600	34700	50100	140000	66300	59000	125000	29400	39400	24000	-
pme2427	222.1	163	N-Acetyl-L-tyrosine	Amino acid derivatives	Negative	2.61	223.085	[M-H]-	3560000	3740000	3840000	4590000	4510000	4320000	5150000	4430000	3220000	3630000	5070000	4080000	2250000	2730000	3340000	-
pme2435	163	70.8	L-Fucose	Carbohydrates	Negative	0.82	164.069	[M-H]-	190000	198000	184000	168000	220000	174000	69000	174000	126000	291000	122000	177000	156000	139000	182000	C01019	C01019	ko01100//Metabolic pathways;ko01120//Microbial metabolism in diverse environments;ko00051//Fructose and mannose metabolism;ko00520//Amino sugar and nucleotide sugar metabolism	Carbohydrate metabolism;Global and Overview	Metabolism
pme2459	449.1	287.1	Luteolin 7-O-glucoside (Cynaroside)	Flavone	Positive	3.77	448.101	[M+H]+	585000	647000	644000	736000	817000	843000	885000	1830000	1740000	314000	466000	358000	173000	560000	447000	C03951	C03951	ko00944//Flavone and flavonol biosynthesis	Biosynthesis of other secondary metabolites	Metabolism
pme2478	137.1	137	Protocatechuic aldehyde	Catechin derivatives	Negative	3.05	138.032	[M-H]-	71100	79000	76200	26100	20700	40500	38900	41400	37700	53000	56300	78200	52800	56200	44200	C16700	C16700	ko00950//Isoquinoline alkaloid biosynthesis	Biosynthesis of other secondary metabolites	Metabolism
pme2493	579.2	433.1	Kaempferol 3,7-dirhamnoside (Kaempferitrin)	Flavonol	Positive	3.77	578.164	[M+H]+	57500	50600	45900	9	9	9	328000	9	9	9	9	9	9	9	9	C16981
pme2527	133	70	L(+)-Ornithine	Amino acids	Positive	0.65	132.16	[M+H]+	4870	5930	11100	10900	2870	15300	15700	8420	12600	13000	13500	14100	5210	12600	11400	C00077	C00077	ko01100//Metabolic pathways;ko01110//Biosynthesis of secondary metabolites;ko01130//Biosynthesis of antibiotics;ko01230//Biosynthesis of amino acids;ko02010//ABC transporters;ko00330//Arginine and proline metabolism;ko01210//2Oxocarboxylic acid metabolism;ko00480//Glutathione metabolism;ko00220//Arginine biosynthesis;ko00472//DArginine and Dornithine metabolism	Amino acid metabolism;Global and Overview;Membrane transport;Metabolism of other amino acids	Metabolism;Environmental Information Processing
pme2529	163.2	162.9	1,5-Anhydro-D-glucitol	Alcohols and polyols	Negative	0.83	164.069	[M-H]-	216000	261000	311000	222000	193000	197000	200000	271000	195000	213000	191000	202000	268000	194000	261000	C07326
pme2541	103	56.8	α-Hydroxyisobutyric acid	Organic acids	Negative	1.55	104.047	[M-H]-	128000	134000	154000	206000	228000	140000	367000	145000	174000	45800	56400	59300	50500	42300	51900	-
pme2559	174	88	N-Acetylaspartate	Amino acid derivatives	Negative	1.19	175.048	[M-H]-	145000	165000	228000	103000	114000	68200	98300	263000	153000	224000	191000	178000	229000	160000	269000	C01042	C01042	ko01100//Metabolic pathways;ko00250//Alanine, aspartate and glutamate metabolism	Amino acid metabolism;Global and Overview	Metabolism
pme2563	249.3	128	γ-Glu-Cys	Amino acid derivatives	Negative	1.21	250.062	[M-H]-	22200	37000	28500	88500	106000	115000	34500	47000	24200	16100	36800	49400	25400	41800	26500	C00669	C00669	ko01100//Metabolic pathways;ko00480//Glutathione metabolism	Global and Overview;Metabolism of other amino acids	Metabolism
pme2569	219	156.1	(5-L-Glutamyl)-L-amino acid	Amino acid derivatives	Positive	1.13	218.09	[M+H]+	182000	243000	243000	223000	164000	229000	270000	354000	544000	210000	271000	227000	181000	212000	182000	C03740	C03740	ko00480//Glutathione metabolism	Metabolism of other amino acids	Metabolism
pme2589	159.1	58.8	Oxoadipic acid	Organic acids	Negative	1.17	160.037	[M-H]-	50400	55800	47100	67300	94300	75900	56400	53200	120000	72800	93000	98700	68700	112000	50700	C00322	C00322	ko01100//Metabolic pathways;ko01120//Microbial metabolism in diverse environments;ko01130//Biosynthesis of antibiotics;ko01230//Biosynthesis of amino acids;ko01210//2Oxocarboxylic acid metabolism;ko00380//Tryptophan metabolism;ko00310//Lysine degradation;ko00300//Lysine biosynthesis	Amino acid metabolism;Global and Overview	Metabolism
pme2594	182.1	138.1	4-Pyridoxic acid	Pyridine derivatives	Negative	1.67	183.053	[M-H]-	20600000	25700000	25700000	22100000	20300000	15200000	35700000	47900000	31400000	17500000	17600000	22900000	25300000	21400000	16300000	C00847	C00847	ko01100//Metabolic pathways;ko01120//Microbial metabolism in diverse environments;ko00750//Vitamin B6 metabolism	Global and Overview;Metabolism of cofactors and vitamins	Metabolism
pme2598	167.1	139	3,4-Dihydroxybenzeneacetic acid	Organic acids	Negative	2.43	168.042	[M-H]-	827000	1310000	1210000	2280000	1910000	1260000	856000	2460000	819000	956000	1250000	1270000	1040000	1290000	784000	-	C01161	ko01100//Metabolic pathways;ko01120//Microbial metabolism in diverse environments;ko01220//Degradation of aromatic compounds;ko00350//Tyrosine metabolism	Global and Overview;Amino acid metabolism	Metabolism
pme2601	89	68.9	3-Hydroxypropanoic acid	Organic acids	Negative	1.19	90.032	[M-H]-	75400	98000	74400	149000	123000	139000	82800	86500	91100	75200	135000	125000	130000	95300	130000	C01013	C01013	ko01100//Metabolic pathways;ko01120//Microbial metabolism in diverse environments;ko00240//Pyrimidine metabolism;ko01200//Carbon metabolism;ko00410//betaAlanine metabolism;ko00640//Propanoate metabolism	Global and Overview;Metabolism of other amino acids;Nucleotide metabolism;Carbohydrate metabolism	Metabolism
pme2602	184.1	78.8	O-Phospho-L-serine	Amino acid derivatives	Negative	1.19	185.009	[M-H]-	30000	27000	36200	30400	33100	55500	36100	29700	38700	52900	24100	28100	13000	46300	41200	C01005	C01005	ko01100//Metabolic pathways;ko01120//Microbial metabolism in diverse environments;ko01130//Biosynthesis of antibiotics;ko01230//Biosynthesis of amino acids;ko00970//AminoacyltRNA biosynthesis;ko01200//Carbon metabolism;ko00270//Cysteine and methionine metabolism;ko00260//Glycine, serine and threonine metabolism	Global and Overview;Translation;Amino acid metabolism	Genetic Information Processing;Metabolism
pme2603	152	108.1	3-Hydroxyanthranilic acid	Organic acids	Negative	2.67	153.043	[M-H]-	192000	216000	212000	201000	295000	147000	555000	238000	280000	136000	130000	154000	199000	129000	197000	C00632	C00632	ko01100//Metabolic pathways;ko01120//Microbial metabolism in diverse environments;ko00380//Tryptophan metabolism	Global and Overview;Amino acid metabolism	Metabolism
pme2607	192.1	114.9	5-Hydroxyindole-3-acetic acid	Indole derivatives	Positive	3.04	191.058	[M+H]+	680000	812000	683000	718000	621000	880000	492000	375000	556000	1200000	1230000	876000	952000	1570000	1100000	C05635	C05635	ko01100//Metabolic pathways;ko00380//Tryptophan metabolism	Global and Overview;Amino acid metabolism	Metabolism
pme2617	166	149.1	Methionine sulfoxide	Amino acid derivatives	Positive	0.65	165.046	[M+H]+	1290000	1470000	1330000	1320000	1410000	1510000	1550000	1550000	1500000	1290000	1330000	1750000	1400000	1340000	1380000	-
pme2634	118	88	Dl-Norvaline	Amino acids	Positive	0.84	117.079	[M+H]+	4590000	6000000	5950000	7900000	7370000	7790000	6370000	6320000	6170000	4700000	4990000	5820000	5090000	6120000	5480000	C01826
pme2651	742.1	620.2	NADP	Others	Negative	1.22	743.075	[M-H]-	105000	121000	138000	175000	207000	171000	136000	100000	139000	129000	168000	166000	125000	138000	132000	C00006	C00006	ko01100//Metabolic pathways;ko00480//Glutathione metabolism;ko00760//Nicotinate and nicotinamide metabolism;ko00195//Photosynthesis	Metabolism of cofactors and vitamins;Metabolism of other amino acids;Global and Overview;Energy metabolism	Metabolism
pme2652	205	127.1	(R)-lipoic acid	Organic acids	Negative	5.91	206.044	[M-H]-	6090	6330	6040	4640	2290	3410	8340	6030	3300	2010	2870	1840	2580	2850	2820	C00725	C16241	ko01100//Metabolic pathways;ko00785//Lipoic acid metabolism	Global and Overview;Metabolism of cofactors and vitamins	Metabolism
pme2661	383	281.1	Vitamin D3	Vitamins	Negative	5.61	384.339	[M-H]-	83000	100000	83700	73200	72600	89700	9	207000	47500	47600	57200	50500	87400	44400	74300	C05443	C05443	ko01100//Metabolic pathways;ko00100//Steroid biosynthesis	Global and Overview;Lipid metabolism	Metabolism
pme2671	123	76.9	4-Hydroxybenzaldehyde	Benzoic acid derivatives	Positive	3.68	122.037	[M+H]+	431000	474000	386000	434000	416000	424000	380000	331000	339000	208000	219000	261000	235000	146000	110000	C00633	C00633	ko01100//Metabolic pathways;ko01120//Microbial metabolism in diverse environments	Global and Overview	Metabolism
pme2693	131	71.9	N-Acetylputrescine	Phenolamides	Positive	0.72	130.111	[M+H]+	255000	450000	340000	410000	380000	332000	518000	396000	473000	347000	378000	419000	244000	271000	263000	C02714	C02714	ko01100//Metabolic pathways;ko00330//Arginine and proline metabolism	Global and Overview;Amino acid metabolism	Metabolism
pme2695	311.4	147.1	Phe-Phe	Amino acid derivatives	Negative	3.56	312.147	[M-H]-	206000	253000	280000	308000	295000	180000	282000	311000	445000	255000	161000	231000	218000	215000	179000	-
pme2702	144.1	102	4-Acetamidobutyric acid	Organic acids	Negative	1.62	145.074	[M-H]-	161000	156000	118000	114000	105000	146000	115000	207000	166000	110000	109000	158000	101000	112000	108000	C02946	C02946	ko01100//Metabolic pathways;ko00330//Arginine and proline metabolism	Global and Overview;Amino acid metabolism	Metabolism
pme2706	153.2	109	2,3-Dihydroxybenzoic acid	Organic acids	Negative	2.64	154.027	[M-H]-	254000	281000	292000	244000	245000	320000	241000	222000	293000	406000	545000	523000	263000	448000	361000	C00196	C00196	ko01110//Biosynthesis of secondary metabolites;ko01120//Microbial metabolism in diverse environments;ko01130//Biosynthesis of antibiotics	Global and Overview	Metabolism
pme2723	146.1	118.1	Indole-3-carboxaldehyde	Indole derivatives	Positive	4.49	145.053	[M+H]+	706000	727000	689000	881000	675000	909000	458000	401000	469000	543000	690000	551000	311000	392000	347000	C08493
pme2735	399.2	250.1	S-(5'-Adenosyl)-L-methionine	Amino acid derivatives	Positive	0.76	398.137	[M+H]+	3440000	7570000	6900000	6900000	8500000	7120000	7210000	7460000	6960000	6900000	7880000	7330000	13000000	7340000	8660000	C00019	C00019	ko01100//Metabolic pathways;ko01110//Biosynthesis of secondary metabolites;ko01130//Biosynthesis of antibiotics;ko01230//Biosynthesis of amino acids;ko00330//Arginine and proline metabolism;ko00270//Cysteine and methionine metabolism;ko00261//Monobactam biosynthesis;ko00908//Zeatin biosynthesis;ko04122//Sulfur relay system	Folding, sorting and degradation;Amino acid metabolism;Biosynthesis of other secondary metabolites;Global and Overview;Metabolism of terpenoids and polyketides	Metabolism;Genetic Information Processing
pme2746	784.2	437.2	Flavin adenine dinucleotide (FAD)	Nucleotide and its derivates	Negative	2.78	785.157	[M-H]-	206000	257000	236000	295000	291000	348000	375000	252000	321000	243000	272000	236000	128000	161000	156000	C00016	C00016	ko01100//Metabolic pathways;ko01110//Biosynthesis of secondary metabolites;ko00740//Riboflavin metabolism	Metabolism of cofactors and vitamins;Global and Overview	Metabolism
pme2761	161	160.9	4-Hydroxy-2-oxoglutaric acid	Organic acids	Negative	1.11	162.016	[M-H]-	67500	94500	59800	131000	143000	95500	80000	149000	39500	102000	131000	90800	126000	78300	139000	C01127	C01127	ko00630//Glyoxylate and dicarboxylate metabolism	Carbohydrate metabolism	Metabolism
pme2776	253.1	137.1	2'-Deoxyinosine	Nucleotide and its derivates	Positive	1.68	252.086	[M+H]+	39300	53500	56500	9	9	83200	66300	62200	81500	91800	65200	159000	135000	92100	85000	C05512	C05512	ko01100//Metabolic pathways;ko00230//Purine metabolism	Nucleotide metabolism;Global and Overview	Metabolism
pme2798	165	150.1	7-Methylxanthine	Nucleotide and its derivates	Negative	1.69	166.049	[M-H]-	121000	138000	137000	140000	179000	136000	172000	109000	88400	167000	159000	170000	96100	104000	101000	C16353	C16353	ko01100//Metabolic pathways;ko01110//Biosynthesis of secondary metabolites;ko01120//Microbial metabolism in diverse environments;ko00232//Caffeine metabolism	Global and Overview;Biosynthesis of other secondary metabolites	Metabolism
pme2819	287.2	173.2	All-trans-13,14-dihydroretinol	Vitamins	Positive	11.2	286.23	[M+H]+	5700	5850	5140	6190	4130	2810	5000	3470	6240	8040	8840	5530	7760	6530	8280	-
pme2827	239	223	Palmitaldehyde	Lipids_Fatty acids	Negative	6.74	240.245	[M-H]-	44500000	82200000	92100000	13100000	7420000	9490000	7900000	10000000	11800000	14200000	12200000	7710000	8060000	15500000	9060000	C00517	C00517	ko00071//Fatty acid degradation	Lipid metabolism	Metabolism
pme2828	140	98.9	4-Nitrophenol	Others	Positive	0.59	139.027	[M+H]+	1290000	1820000	2020000	622000	1310000	969000	804000	4140000	687000	5950000	1890000	5210000	3860000	1790000	3490000	C00870	C00870	ko01120//Microbial metabolism in diverse environments	Global and Overview	Metabolism
pme2836	178.1	160.1	5-Hydroxytryptophol	Indole derivatives	Positive	2.86	177.079	[M+H]+	286000	383000	322000	443000	321000	473000	412000	364000	323000	434000	428000	349000	531000	259000	380000	-
pme2890	269	134	L-Homocystine	Amino acids	Positive	0.81	268.055	[M+H]+	32500	48300	45600	65100	50100	56900	58800	71200	40200	45500	72800	57000	40700	37300	45100	C01817	C01817	ko00270//Cysteine and methionine metabolism	Amino acid metabolism	Metabolism
pme2898	321.1	153.1	Dihydromyricetin	Flavonol	Positive	3.53	320.053	[M+H]+	1060000	1670000	1400000	867000	733000	613000	2500000	1920000	1810000	482000	786000	462000	1770000	2370000	1390000	C02906	C02906	ko01110//Biosynthesis of secondary metabolites;ko00941//Flavonoid biosynthesis	Biosynthesis of other secondary metabolites;Global and Overview	Metabolism
pme2901	353.1	191.1	1-O-Caffeoyl quinic acid	Quinate and its derivatives	Negative	2.38	354.095	[M-H]-	6220000	6120000	5320000	4820000	5120000	5300000	2790000	1780000	1220000	9740000	10200000	6780000	8940000	7050000	9180000	-
pme2909	358	96.9	(-)-Sinigrin hydrate	Others	Negative	1.27	397.46	[M-K]-	26000000	31100000	30100000	98400000	82300000	137000000	1090000	1360000	1980000	1410000	765000	927000	687000	1460000	1240000	-
pme2914	161	56.8	3-Hydroxy-3-methylpentane-1,5-dioic acid	Amino acid derivatives	Negative	1.4	162.053	[M-H]-	5860000	6350000	6060000	5600000	7130000	4860000	6090000	4440000	8350000	5530000	5150000	4990000	5590000	5800000	5680000	C03761
pme2957	271.1	151.1	Naringenin chalcone	Flavanone	Negative	5.45	272.069	[M-H]-	56400	56500	65300	50800	49800	67500	73100	49400	70400	61800	62100	35100	32700	46600	50400	C06561	C06561	ko01100//Metabolic pathways;ko01110//Biosynthesis of secondary metabolites;ko00941//Flavonoid biosynthesis	Biosynthesis of other secondary metabolites;Global and Overview	Metabolism
pme2963	287.1	125.1	Aromadedrin (Dihydrokaempferol)	Flavonol	Negative	4.58	288.063	[M-H]-	33800	39100	40300	38000	37900	53900	43400	27300	46200	28900	40200	26500	27100	45500	35600	C00974	C00974	ko01100//Metabolic pathways;ko01110//Biosynthesis of secondary metabolites;ko00941//Flavonoid biosynthesis	Global and Overview;Biosynthesis of other secondary metabolites	Metabolism
pme2984	593	285.2	Isosakuranetin-7-neohesperidoside (Poncirin)	Flavanone	Negative	4.9	594.195	[M-H]-	9	9	9	9	9	9	9	10700	9	9	28900	9	9	9	9	C09830
pme2993	193.1	178.1	Scopoletin (7-Hydroxy-5-methoxycoumarin)	Coumarins	Positive	4	192.042	[M+H]+	1400000	1260000	1520000	545000	576000	644000	763000	567000	854000	1040000	1190000	993000	1210000	1450000	1340000	C01752	C01752	ko01110//Biosynthesis of secondary metabolites;ko00940//Phenylpropanoid biosynthesis	Biosynthesis of other secondary metabolites;Global and Overview	Metabolism
pme3011	104.1	87	γ-aminobutyric acid	Organic acids	Positive	0.77	103.063	[M+H]+	158000	188000	170000	146000	271000	170000	269000	192000	121000	137000	210000	170000	112000	126000	155000	C00334	C00334	ko01100//Metabolic pathways;ko01120//Microbial metabolism in diverse environments;ko00330//Arginine and proline metabolism;ko00760//Nicotinate and nicotinamide metabolism;ko00250//Alanine, aspartate and glutamate metabolism;ko00410//betaAlanine metabolism;ko00650//Butanoate metabolism	Amino acid metabolism;Carbohydrate metabolism;Metabolism of other amino acids;Metabolism of cofactors and vitamins;Global and Overview	Metabolism
pme3017	104	85.9	2-Aminoisobutyric acid	Amino acid derivatives	Positive	0.74	103.063	[M+H]+	5220000	5750000	5800000	6720000	5320000	5950000	6020000	5770000	6980000	5540000	5920000	8050000	5850000	5900000	5540000	C03665
pme3033	104	58	N,N-Dimethylglycine	Amino acid derivatives	Positive	0.75	103.063	[M+H]+	2800000	2960000	2970000	3400000	3180000	3150000	3170000	2870000	3530000	2860000	3260000	3850000	2850000	2970000	3060000	C01026	C01026	ko01100//Metabolic pathways;ko00260//Glycine, serine and threonine metabolism	Global and Overview;Amino acid metabolism	Metabolism
pme3034	131	86.9	ethylmalonate	Organic acids	Negative	1.89	132.042	[M-H]-	95500	113000	112000	76000	97500	68500	117000	116000	113000	71500	130000	86000	90300	96600	115000	-
pme3038	130	83.9	5-oxoproline	Amino acid derivatives	Positive	1.04	129.043	[M+H]+	2700000	4360000	4500000	6640000	4920000	5990000	3940000	3880000	5230000	3550000	6260000	4570000	3360000	6150000	3390000	C01879	C01879	ko00480//Glutathione metabolism	Metabolism of other amino acids	Metabolism
pme3069	556.3	371.2	Taurocholic acid	Organic acids	Positive	10.22	555.284	[M+H]+	343000	266000	206000	271000	254000	258000	273000	268000	257000	234000	208000	239000	231000	247000	244000	C05122	C05122	ko01100//Metabolic pathways;ko00430//Taurine and hypotaurine metabolism	Global and Overview;Metabolism of other amino acids	Metabolism
pme3081	169.1	134.1	4-(Aminomethyl)-5-(hydroxymethyl)-2-methylpyridin-3-ol	Others	Positive	0.66	168.09	[M+H]+	170000	260000	252000	225000	189000	222000	330000	246000	333000	177000	270000	193000	156000	175000	145000	C00534	C00534	ko01100//Metabolic pathways;ko01120//Microbial metabolism in diverse environments;ko00750//Vitamin B6 metabolism	Global and Overview;Metabolism of cofactors and vitamins	Metabolism
pme3083	164	92	2-(Formylamino)benzoic acid	Organic acids	Negative	3.84	165.043	[M-H]-	131000	156000	124000	109000	118000	136000	123000	216000	145000	133000	138000	141000	89600	91300	77200	-
pme3090	239	168.1	(S)-2-(4-Aminobutanamido)-3-(1-methyl-1H-imidazol-5-yl)propanoic acid	Organic acids	Negative	0.65	240.122	[M-H]-	1040	1630	1460	9	9	570	1540	2240	2510	1460	1020	2300	1780	1260	1430	-
pme3096	118	73.9	Aminomalonic acid	Organic acids	Negative	1.32	119.022	[M-H]-	4950000	5040000	4930000	4950000	5120000	4830000	5480000	4990000	4280000	5270000	7220000	5650000	3180000	2860000	2980000	C00872
pme3104	150	133.1	1-Methyladenine	Nucleotide and its derivates	Positive	1.03	149.07	[M+H]+	788000	1060000	998000	962000	890000	830000	1000000	771000	1240000	904000	1290000	1150000	1000000	1140000	1070000	C02216
pme3123	209	179.1	Sinapyl alcohol	Hydroxycinnamoyl derivatives	Negative	3.83	210.089	[M-H]-	18300	18700	22400	10700	19700	13200	16700	18600	21900	21200	22300	17200	18700	25100	11400	C02325	C02325	ko01100//Metabolic pathways;ko01110//Biosynthesis of secondary metabolites;ko00940//Phenylpropanoid biosynthesis	Biosynthesis of other secondary metabolites;Global and Overview	Metabolism
pme3130	465	302.9	Quercetin 4'-O-glucoside (Spiraeoside)	Flavonol	Positive	3.85	464.096	[M+H]+	7000000	6700000	6430000	2240000	2320000	1980000	4860000	5320000	3350000	2460000	2330000	3180000	9	9	2630000	-
pme3146	145.1	102	Ureidoisobutyric acid	Organic acids	Negative	1.38	146.069	[M-H]-	9410	12900	11300	10400	6720	8890	8470	9320	9	19000	29600	12100	6690	10500	4080	-
pme3154	147.1	58.8	(Rs)-Mevalonic acid	Organic acids	Negative	1.3	148.074	[M-H]-	254000	244000	215000	271000	239000	158000	169000	278000	185000	182000	140000	102000	128000	128000	165000	-
pme3160	259	96.9	D-Glucose 6-phosphate	Carbohydrates	Negative	0.69	260.03	[M-H]-	2970000	3390000	3380000	1740000	2490000	1820000	2750000	2440000	4530000	1640000	2000000	1920000	5530000	6260000	5750000	C00092	C00092	ko01100//Metabolic pathways;ko01130//Biosynthesis of antibiotics;ko00500//Starch and sucrose metabolism;ko00562//Inositol phosphate metabolism	Carbohydrate metabolism;Global and Overview	Metabolism
pme3163	289	78.9	D-Sedoheptuiose 7-phosphate	Carbohydrates	Negative	1.08	290.04	[M-H]-	16400000	17000000	16800000	21900000	24800000	19700000	17000000	25200000	21200000	35900000	22100000	28200000	29000000	21600000	22300000	-
pme3174	324	112	Cytidine 5'-monophosphate (Cytidylic acid)	Nucleotide and its derivates	Positive	0.78	323.052	[M+H]+	72800	113000	109000	110000	146000	134000	87500	105000	92200	82900	102000	119000	94600	48000	9	C00055	C00055	ko01100//Metabolic pathways;ko00240//Pyrimidine metabolism	Global and Overview;Nucleotide metabolism	Metabolism
pme3179	179	75.9	CYS-GLY	Amino acid derivatives	Positive	0.78	178.041	[M+H]+	46600	39000	43500	183000	166000	170000	163000	83400	146000	152000	169000	221000	164000	157000	67400	C01419	C01419	ko01100//Metabolic pathways;ko00480//Glutathione metabolism	Metabolism of other amino acids;Global and Overview	Metabolism
pme3184	332	136.1	2'-Deoxyadenosine-5'-monophosphate	Nucleotide and its derivates	Positive	1.14	331.068	[M+H]+	2000000	3880000	3770000	4140000	4110000	4330000	5170000	4010000	3640000	3660000	3250000	3480000	3610000	3040000	2970000	C00360	C00360	ko01100//Metabolic pathways;ko00230//Purine metabolism	Nucleotide metabolism;Global and Overview	Metabolism
pme3188	323	78.8	Uridine 5'-monophosphate	Nucleotide and its derivates	Negative	1.23	324.036	[M-H]-	67300	75800	84000	127000	151000	85600	38400	29600	42100	75100	133000	128000	47200	70500	49100	C00105	C00105	ko01100//Metabolic pathways;ko00240//Pyrimidine metabolism	Nucleotide metabolism;Global and Overview	Metabolism
pme3193	116	73.9	N-acetylglycine	Amino acid derivatives	Negative	1.2	117.043	[M-H]-	25400	14400	25100	20100	34700	24600	24400	17500	26200	28900	17100	21600	13400	21700	33900	-
pme3197	330	136	Cyclic AMP	Nucleotide and its derivates	Positive	1.89	329.053	[M+H]+	17400	32300	27000	27200	32900	21200	28200	31100	21400	29200	49100	35300	26800	26800	9	C00575	C00575	ko00230//Purine metabolism	Nucleotide metabolism	Metabolism
pme3198	153	109	2,4-Dihydroxybenzoic acid	Benzoic acid derivatives	Negative	2.85	154.027	[M-H]-	275000	232000	240000	244000	117000	252000	216000	191000	97200	311000	495000	309000	274000	314000	347000	-
pme3207	141	58.7	trans,trans-Muconic acid	Organic acids	Negative	0.69	142.027	[M-H]-	760000	813000	699000	1510000	1570000	1150000	806000	376000	604000	402000	1190000	443000	442000	551000	564000	-
pme3210	433	270.9	Genistein 7-O-Glucoside (Genistin)	Isoflavone	Positive	3.93	432.106	[M+H]+	623000	565000	525000	904000	793000	683000	789000	463000	609000	437000	290000	280000	169000	169000	189000	C09126	C09126	ko00943//Isoflavonoid biosynthesis	Biosynthesis of other secondary metabolites	Metabolism
pme3212	465	302.8	Quercetin 3-O-glucoside (Isotrifoliin)	Flavonol	Positive	3.81	464.096	[M+H]+	6400000	7340000	7270000	2780000	3100000	2200000	4880000	6300000	4350000	2460000	1870000	1950000	4690000	2940000	2890000	C05623	C05623	ko01100//Metabolic pathways;ko01110//Biosynthesis of secondary metabolites;ko00944//Flavone and flavonol biosynthesis	Global and Overview;Biosynthesis of other secondary metabolites	Metabolism
pme3221	165	137.1	Isoeugenol	Others	Positive	6.54	164.084	[M+H]+	1020000	819000	779000	572000	549000	561000	1250000	609000	894000	1000000	845000	1800000	391000	1050000	546000	C10469	C10469	ko00940//Phenylpropanoid biosynthesis	Biosynthesis of other secondary metabolites	Metabolism
pme3246	341	179.1	Coniferin	Hydroxycinnamoyl derivatives	Negative	2.72	342.132	[M-H]-	1030000	1080000	1060000	984000	1260000	1580000	513000	319000	495000	1310000	1400000	1020000	1440000	1320000	1300000	C00761	C00761	ko00940//Phenylpropanoid biosynthesis	Biosynthesis of other secondary metabolites	Metabolism
pme3255	179	138	Methyleugenol	Hydroxycinnamoyl derivatives	Positive	7.3	178.099	[M+H]+	12800	8330	14200	9540	15700	9080	13600	8370	15100	15800	16700	13200	4030	9570	12400	C10454	C10454	ko00940//Phenylpropanoid biosynthesis	Biosynthesis of other secondary metabolites	Metabolism
pme3267	447	284	Kaempferol 3-O-galactoside (Trifolin)	Flavonol	Negative	3.99	448.101	[M-H]-	1730000	2130000	2070000	1180000	1290000	1260000	2390000	1480000	1250000	637000	796000	617000	345000	466000	562000	C12626	C12626	ko00944//Flavone and flavonol biosynthesis	Biosynthesis of other secondary metabolites	Metabolism
pme3282	273	97	Afzelechin (3,5,7,4'-Tetrahydroxyflavan)	Flavanone	Negative	3.29	274.084	[M-H]-	19100	34900	31800	7790	17300	16800	45300	37000	30500	25700	43700	25600	15400	17600	20600	C09320	C09320	ko01110//Biosynthesis of secondary metabolites;ko00941//Flavonoid biosynthesis	Biosynthesis of other secondary metabolites;Global and Overview	Metabolism
pme3296	431	285.1	Kaempferol 3-O-rhamnoside (Kaempferin)	Flavonol	Negative	4.45	432.106	[M-H]-	22200	30500	24100	21000	20000	13200	25000	37200	30700	14500	9	16900	18100	11600	16300	C16911	C16911	ko00944//Flavone and flavonol biosynthesis	Biosynthesis of other secondary metabolites	Metabolism
pme3309	145.1	101.1	2-Methylglutaric acid	Organic acids	Negative	2.63	146.058	[M-H]-	353000	369000	373000	362000	249000	443000	294000	316000	424000	441000	537000	354000	312000	441000	373000	-
pme3313	259	78.8	D-Fructose 6-phosphate	Carbohydrates	Negative	0.97	260.03	[M-H]-	741000	885000	750000	422000	607000	443000	748000	615000	1110000	410000	545000	506000	1420000	1480000	1380000	C00085	C00085	ko01100//Metabolic pathways;ko01120//Microbial metabolism in diverse environments;ko01200//Carbon metabolism;ko00500//Starch and sucrose metabolism;ko00710//Carbon fixation in photosynthetic organisms	Energy metabolism;Carbohydrate metabolism;Global and Overview	Metabolism
pme3333	153.1	136.1	1,4-dihydro-1-Methyl-4-oxo-3-pyridinecarboxamide	Pyridine derivatives	Positive	1.48	152.059	[M+H]+	213000	282000	277000	296000	265000	322000	248000	244000	233000	258000	385000	267000	125000	184000	162000	-
pme3336	382	134.1	N6-Succinyl Adenosine	Nucleotide and its derivates	Negative	2.17	383.108	[M-H]-	256000	277000	224000	379000	410000	212000	395000	481000	163000	75900	144000	198000	186000	164000	146000	-
pme3346	131.1	70.8	5-hydroxyhexanoic acid	Organic acids	Negative	2.63	132.079	[M-H]-	18500	29200	33200	22400	25000	27100	18800	22100	49300	38200	32600	24200	17800	11800	9	-
pme3351	144.1	126.1	Allysine(6-Oxo DL-Norleucine)	Amino acid derivatives	Negative	0.82	145.074	[M-H]-	66000	91200	87300	103000	72000	83100	57100	86300	106000	82300	77600	83200	69100	45800	89100	C04076	C04076	ko01100//Metabolic pathways;ko01110//Biosynthesis of secondary metabolites;ko01130//Biosynthesis of antibiotics;ko01230//Biosynthesis of amino acids;ko00310//Lysine degradation;ko00300//Lysine biosynthesis;ko00960//Tropane, piperidine and pyridine alkaloid biosynthesis	Biosynthesis of other secondary metabolites;Amino acid metabolism;Global and Overview	Metabolism
pme3367	161	105.1	6-MethylCoumarin	Coumarins	Positive	6.02	160.052	[M+H]+	34600	28900	25500	25500	11800	10900	9520	15400	13100	21200	15000	20900	14400	2820	9	-
pme3382	160	73.9	N-Acetylthreonine	Amino acid derivatives	Negative	1.21	161.069	[M-H]-	389000	481000	551000	327000	361000	355000	337000	557000	364000	505000	502000	523000	549000	556000	604000	-
pme3388	189	144.2	H-HomoArg-OH	Amino acid derivatives	Positive	0.68	188.127	[M+H]+	475000	406000	490000	321000	268000	362000	355000	451000	543000	446000	413000	530000	416000	504000	478000	C01924
pme3391	479	317	Petunidin 3-O-glucoside	Anthocyanins	Positive	2.63	479	Protonated	609000	1210000	1630000	740000	871000	587000	1150000	1410000	1360000	1280000	881000	1600000	1830000	1920000	1490000	C12139	C12139	ko00942//Anthocyanin biosynthesis	Biosynthesis of other secondary metabolites	Metabolism
pme3413	147.1	91	Coumarin	Coumarins	Positive	5.1	146.037	[M+H]+	194000	171000	158000	203000	162000	148000	233000	173000	178000	149000	161000	191000	132000	142000	109000	C05851	C05851	ko01110//Biosynthesis of secondary metabolites;ko00940//Phenylpropanoid biosynthesis	Global and Overview;Biosynthesis of other secondary metabolites	Metabolism
pme3416	177	133.1	Esculetin (6,7-dihydroxycoumarin)	Coumarins	Negative	3.19	178.027	[M-H]-	30200000	29000000	28500000	28500000	25800000	25200000	23800000	35100000	20800000	25400000	31100000	32000000	28400000	19800000	26700000	C09263
pme3425	209.2	194.1	6-Methoxy-7,8-DihydroxyCoumarin	Coumarins	Positive	3.57	208.037	[M+H]+	1490000	1790000	1700000	1730000	1610000	1460000	1520000	1380000	1520000	1430000	1860000	1410000	1620000	1560000	1380000	C09265
pme3428	339.1	177.1	Esculin (6,7-Dihydroxycoumarin-6-glucoside)	Coumarins	Negative	2.71	340.079	[M-H]-	1010000	1060000	739000	706000	1010000	351000	916000	1100000	777000	889000	490000	982000	1640000	561000	1020000	C09264
pme3442	477.1	301.1	Quercetin 7-O-β-D-Glucuronide	Flavonol	Negative	3.67	478.36	[M-H]-	89200	131000	135000	9	12000	31900	20400	84500	32400	217000	277000	332000	87900	115000	154000	-
pme3443	207.1	177.1	Sinapinaldehyde	Hydroxycinnamoyl derivatives	Negative	4.43	208	[M-H]-	205000	237000	222000	196000	250000	151000	308000	211000	282000	171000	243000	209000	153000	214000	178000	-
pme3456	149.1	131	p-Coumaraldehyde	Hydroxycinnamoyl derivatives	Positive	4.12	148	[M+H]+	118000	91600	157000	9	9	49400	9	293000	9	9	9	171000	9	9	9	-	C05608	ko01100//Metabolic pathways;ko01110//Biosynthesis of secondary metabolites;ko00940//Phenylpropanoid biosynthesis	Biosynthesis of other secondary metabolites;Global and Overview	Metabolism
pme3459	317.2	281.3	Caffeyl alcohol	Hydroxycinnamoyl derivatives	Positive	7.53	316	[M+H]+	163000	144000	110000	174000	142000	161000	158000	129000	134000	168000	178000	109000	149000	114000	146000	C09066	C12206	ko01110//Biosynthesis of secondary metabolites;ko00940//Phenylpropanoid biosynthesis	Biosynthesis of other secondary metabolites;Global and Overview	Metabolism
pme3468	739.2	593.3	Kaempferol-3-O-robinoside-7-O-rhamnoside (Robinin)	Flavonol	Negative	3.25	740.216	[M-H]-	9	9	9	9	9	9	29100	9	9	9	9	9	9	9	9	C10178
pme3473	271.1	151	Butin	Flavone	Negative	5.59	272.069	[M-H]-	62400	59200	61400	56600	46000	79000	85000	47000	82300	53000	76800	42000	41000	62900	55800	C09614	C09614	ko00941//Flavonoid biosynthesis	Biosynthesis of other secondary metabolites	Metabolism
pme3478	277.1	146.2	Pantetheine	Vitamins	Negative	2.75	278.13	[M-H]-	448000	435000	357000	869000	910000	431000	710000	1040000	465000	308000	400000	548000	591000	327000	511000	C00831	C00831	ko01130//Biosynthesis of antibiotics;ko00770//Pantothenate and CoA biosynthesis;ko00332//Carbapenem biosynthesis	Biosynthesis of other secondary metabolites;Global and Overview;Metabolism of cofactors and vitamins	Metabolism
pme3484	479.1	317.3	Myricetin 3-O-galactoside	Flavonol	Negative	3.43	480.09	[M-H]-	412000	467000	467000	458000	482000	274000	485000	530000	493000	433000	313000	482000	621000	431000	483000	-
pme3514	301	151.1	Morin	Flavonol	Negative	5.08	302.043	[M-H]-	162000	160000	159000	54400	68900	39900	97800	294000	120000	74100	114000	44700	46100	73200	156000	C10105
pme3569	207.1	207.1	Scoparone	Coumarins	Positive	4.73	206.058	[M+H]+	57900	56500	46400	51400	45100	32800	32300	51300	46100	21000	19100	42900	56200	9	32500	C09311
pme3576	138.1	91.9	Anthranilic acid	Benzoic acid derivatives	Positive	4.01	137.048	[M+H]+	149000	82300	81500	38000	38700	72300	85400	51200	36800	33500	61000	39200	9	9	9	C00108	C00108	ko01100//Metabolic pathways;ko01110//Biosynthesis of secondary metabolites;ko01120//Microbial metabolism in diverse environments;ko01130//Biosynthesis of antibiotics;ko01230//Biosynthesis of amino acids;ko00380//Tryptophan metabolism;ko01220//Degradation of aromatic compounds;ko00400//Phenylalanine, tyrosine and tryptophan biosynthesis;ko01058//Acridone alkaloid biosynthesis	Global and Overview;Biosynthesis of other secondary metabolites;Amino acid metabolism	Metabolism
pme3609	287	231.6	Cyanidin	Anthocyanins	Positive	3.45	287.24	Protonated	2690000	3860000	4860000	4780000	8490000	3030000	6670000	8050000	7070000	917000	474000	909000	909000	393000	336000	C05905	C05905	ko01110//Biosynthesis of secondary metabolites;ko00941//Flavonoid biosynthesis;ko00942//Anthocyanin biosynthesis	Biosynthesis of other secondary metabolites;Global and Overview	Metabolism
pme3719	165.1	74.9	D-Xylonic acid	Organic acids	Negative	0.95	166.048	[M-H]-	7410000	8990000	7570000	8690000	11000000	9050000	5810000	6790000	8880000	8550000	6150000	6740000	8820000	8420000	9570000	-
pme3827	198.2	114.9	3,4-Dihydroxy-DL-phenylalanine	Amino acid derivatives	Positive	1.15	197.069	[M+H]+	147000	209000	157000	278000	269000	278000	196000	83700	147000	90500	156000	173000	216000	158000	146000	C00355	C00355	ko01100//Metabolic pathways;ko01110//Biosynthesis of secondary metabolites;ko00350//Tyrosine metabolism;ko00950//Isoquinoline alkaloid biosynthesis;ko00965//Betalain biosynthesis	Global and Overview;Biosynthesis of other secondary metabolites;Amino acid metabolism	Metabolism
pme3835	344.2	344	Guanosine 3',5'-cyclic monophosphate	Nucleotide and its derivates	Negative	1.37	345.047	[M-H]-	284000	346000	322000	481000	505000	337000	118000	99600	160000	448000	672000	588000	83200	161000	138000	C00942	C00942	ko00230//Purine metabolism	Nucleotide metabolism	Metabolism
pme3840	204.1	71.7	Pantothenol	Alcohols and polyols	Negative	0.82	205.131	[M-H]-	29600	32100	26700	46700	42800	30500	28300	26300	28200	21200	51800	32100	14000	18800	18000	C05944	C05944	ko00770//Pantothenate and CoA biosynthesis	Metabolism of cofactors and vitamins	Metabolism
pme3961	252	136.1	Deoxyadenosine	Nucleotide and its derivates	Positive	1.96	251.102	[M+H]+	193000	337000	307000	452000	795000	388000	130000	234000	86500	493000	265000	454000	149000	9	129000	C00559	C00559	ko01100//Metabolic pathways;ko00230//Purine metabolism	Nucleotide metabolism;Global and Overview	Metabolism
pme3965	310	178.1	2-(dimethylamino)guanosine	Nucleotide and its derivates	Negative	2.32	311.123	[M-H]-	67900	71700	91100	194000	170000	161000	19800	28800	26500	85200	156000	135000	16500	20000	11400	-
pme3970	243	153.1	β-Pseudouridine	Nucleotide and its derivates	Negative	1.2	244.07	[M-H]-	120000	135000	149000	119000	122000	125000	102000	77700	108000	134000	189000	134000	110000	116000	116000	C02067	C02067	ko00240//Pyrimidine metabolism	Nucleotide metabolism	Metabolism
pme3982	267.1	135.1	Hypoxanthine-9-β-D-arabinofuranoside	Nucleotide and its derivates	Negative	1.43	268.081	[M-H]-	834000	1000000	991000	771000	529000	500000	990000	951000	935000	1250000	1820000	544000	976000	867000	1140000	-
