# Supplementary material for: Characterization of cold stress responses in different rapeseed ecotypes based on metabolomics and transcriptomics analyses
Source: PeerJ. 2020 Mar 31;8:e8704. doi: 10.7717/peerj.8704 (PMC7120054; doi:10.7717/peerj.8704)
Supplement: Supplemental Information 14 [file peerj-08-8704-s014.xlsx]

## Sheet: S12
Table S12 Differentially accumulated metabolites identified in the two B. napus ecotypes after cold stress.
Index	Compounds	Class	22W-vs-4W_log2_FC(case_mean/control_mean)	22S-vs-4S_log2_FC(case_mean/control_mean)	22W-vs-4W_FDR	22S-vs-4S_FDR	22W-vs-4W_vip	22S-vs-4S_vip	KEGG ID	C_ID	Pathway	KEGG_B_class	KEGG_A_class
pma6460	5-O-p-Coumaroylquinic acid	Quinate and its derivatives	-0.10021	-0.673361	0.345267	0.0188121	0.771587	2.2825	-
pmb0618	8-C-hexosyl-hesperetin O-hexoside	Flavone C-glycosides	0.483876	0.477931	0.41509	0.124244	1.56002	1.00097	-
pmb0782	Piperidine	Alkaloids	-0.24002	-0.439891	0.604579	0.156407	1.38967	1.93728	C01746	C01746	ko00960//Tropane, piperidine and pyridine alkaloid biosynthesis	Biosynthesis of other secondary metabolites	Metabolism
pmb0801	4-Pyridoxic acid O-hexoside	Vitamins	0.534225	0.875433	0.442749	0.0326664	1.63541	1.7278	-
pmb0818	Methoxyindoleacetic acid	Indole derivatives	0.137847	-1.23539	0.811047	0.0387557	0.516614	2.38237	C05660	C05660	ko00380//Tryptophan metabolism	Amino acid metabolism	Metabolism
pmb0852	LysoPC 18:2	Lipids_Glycerophospholipids	1.06362	0.501687	0.00772464	0.078005	5.08143	1.81251	-
pmb0859	LysoPC 18:1 (2n isomer)	Lipids_Glycerophospholipids	0.0845063	-0.787151	0.670716	0.211898	0.99565	2.79984	-
pmb0865	LysoPC 18:3 (2n isomer)	Lipids_Glycerophospholipids	0.908164	0.749958	0.014533	0.20357	4.71608	2.50335	-
pmb0890	MAG (18:2)	Lipids_Glycerolipids	-0.105933	0.656776	0.797248	0.146005	0.902619	3.13453	-
pmb1096	Indole	Indole derivatives	0.137576	-0.987509	0.811047	0.0188121	0.65033	2.6487	C00463	C00463	ko01100//Metabolic pathways;ko01110//Biosynthesis of secondary metabolites;ko00380//Tryptophan metabolism;ko00400//Phenylalanine, tyrosine and tryptophan biosynthesis;ko00402//Benzoxazinoid biosynthesis	Global and Overview;Amino acid metabolism;Biosynthesis of other secondary metabolites	Metabolism
pmb1656	MAG (18:3) isomer4	Lipids_Glycerolipids	0.0882775	0.63743	0.808441	0.078005	0.326207	1.29009	-
pmb2444	MAG (18:3) isomer1	Lipids_Glycerolipids	0.0320338	0.392453	0.88853	0.0894842	0.183665	1.15254	-
pmb2654	Anthranilate O-hexosyl-O-hexoside	Benzoic acid derivatives	-0.0651031	1.79282	0.972147	0.120534	0.0617022	1.2672	-
pmb3061	5-O-p-coumaroyl quinic acid O-hexoside	Quinate and its derivatives	0.190203	-1.21658	0.291809	0.0363687	1.3862	3.96373	-
pmb3064	3-O-p-coumaroyl quinic acid O-hexoside	Quinate and its derivatives	-0.202785	-1.26434	0.517087	0.0912683	1.13435	3.42897	-
pmb3068	1-O-p-Coumaroyl quinic acid	Quinate and its derivatives	0.0658246	-0.506628	0.583011	0.0568216	0.986609	4.19367	-
pmb3093	6,7-dihydroxycoumarin 7-O-quinic acid	Coumarins	-0.247174	-1.66156	0.597784	0.026011	1.47687	2.04832	-
pmc0274	6-Methylmercaptopurine	Nucleotide and its derivates	-0.70848	-0.55791	0.299267	0.144924	1.89437	1.31662	C16614
pme0010	L-Serine	Amino acids	-0.284576	-0.86099	0.563965	0.078005	1.51476	2.51481	C00065	C00065	ko01100//Metabolic pathways;ko01110//Biosynthesis of secondary metabolites;ko01120//Microbial metabolism in diverse environments;ko01130//Biosynthesis of antibiotics;ko01230//Biosynthesis of amino acids;ko02010//ABC transporters;ko00970//AminoacyltRNA biosynthesis;ko01200//Carbon metabolism;ko00270//Cysteine and methionine metabolism;ko00260//Glycine, serine and threonine metabolism;ko00460//Cyan…	Biosynthesis of other secondary metabolites;Amino acid metabolism;Translation;Global and Overview;Carbohydrate metabolism;Energy metabolism;Lipid metabolism;Metabolism of other amino acids;Membrane transport	Environmental Information Processing;Genetic Information Processing;Metabolism
pme0020	L-Phenylalanine	Amino acids	-0.694329	-0.539492	0.291809	0.198784	4.13045	2.65604	C00079	C00079	ko01100//Metabolic pathways;ko01110//Biosynthesis of secondary metabolites;ko01130//Biosynthesis of antibiotics;ko01230//Biosynthesis of amino acids;ko02010//ABC transporters;ko00940//Phenylpropanoid biosynthesis;ko00970//AminoacyltRNA biosynthesis;ko01210//2Oxocarboxylic acid metabolism;ko00360//Phenylalanine metabolism;ko00400//Phenylalanine, tyrosine and tryptophan biosynthesis;ko00460//Cyanoa…	Biosynthesis of other secondary metabolites;Amino acid metabolism;Global and Overview;Translation;Metabolism of other amino acids;Membrane transport	Genetic Information Processing;Environmental Information Processing;Metabolism
pme0026	L-(+)-Lysine	Amino acids	-0.249184	-0.988219	0.702837	0.0188121	1.02823	2.46448	C00047	C00047	ko01100//Metabolic pathways;ko01110//Biosynthesis of secondary metabolites;ko01120//Microbial metabolism in diverse environments;ko01130//Biosynthesis of antibiotics;ko01230//Biosynthesis of amino acids;ko02010//ABC transporters;ko00970//AminoacyltRNA biosynthesis;ko01210//2Oxocarboxylic acid metabolism;ko00310//Lysine degradation;ko00300//Lysine biosynthesis;ko00960//Tropane, piperidine and pyri…	Amino acid metabolism;Biosynthesis of other secondary metabolites;Metabolism of cofactors and vitamins;Membrane transport;Translation;Global and Overview	Environmental Information Processing;Genetic Information Processing;Metabolism
pme0030	L-(-)-Tyrosine	Amino acids	-0.248832	-0.638359	0.620396	0.067542	1.00961	1.67898	C00082	C00082	ko01100//Metabolic pathways;ko01110//Biosynthesis of secondary metabolites;ko01130//Biosynthesis of antibiotics;ko01230//Biosynthesis of amino acids;ko00940//Phenylpropanoid biosynthesis;ko00970//AminoacyltRNA biosynthesis;ko01210//2Oxocarboxylic acid metabolism;ko00350//Tyrosine metabolism;ko00360//Phenylalanine metabolism;ko00400//Phenylalanine, tyrosine and tryptophan biosynthesis;ko00460//Cya…	Biosynthesis of other secondary metabolites;Amino acid metabolism;Global and Overview;Translation;Metabolism of cofactors and vitamins;Metabolism of other amino acids	Metabolism;Genetic Information Processing
pme0050	L-Tryptophan	Amino acids	0.164159	-1.5588	0.788694	0.121354	0.805981	3.19784	C00078	C00078	ko01100//Metabolic pathways;ko01110//Biosynthesis of secondary metabolites;ko01130//Biosynthesis of antibiotics;ko01230//Biosynthesis of amino acids;ko00970//AminoacyltRNA biosynthesis;ko01210//2Oxocarboxylic acid metabolism;ko00380//Tryptophan metabolism;ko00260//Glycine, serine and threonine metabolism;ko00400//Phenylalanine, tyrosine and tryptophan biosynthesis;ko00966//Glucosinolate biosynthe…	Global and Overview;Translation;Amino acid metabolism;Biosynthesis of other secondary metabolites	Genetic Information Processing;Metabolism
pme0193	L-Glutamine	Amino acids	-0.25467	-0.996607	0.722064	0.0188121	0.956639	2.34844	C00064	C00064	ko01100//Metabolic pathways;ko01120//Microbial metabolism in diverse environments;ko01230//Biosynthesis of amino acids;ko02010//ABC transporters;ko00230//Purine metabolism;ko00970//AminoacyltRNA biosynthesis;ko00240//Pyrimidine metabolism;ko00250//Alanine, aspartate and glutamate metabolism;ko00220//Arginine biosynthesis;ko00630//Glyoxylate and dicarboxylate metabolism;ko00910//Nitrogen metabolism	Translation;Membrane transport;Nucleotide metabolism;Global and Overview;Amino acid metabolism;Carbohydrate metabolism;Energy metabolism	Genetic Information Processing;Environmental Information Processing;Metabolism
pme0257	Uracil	Nucleotide and its derivates	-0.0156307	-0.907219	0.972921	0.0296798	0.0760287	1.49102	C00106	C00106	ko01100//Metabolic pathways;ko00240//Pyrimidine metabolism;ko00410//betaAlanine metabolism;ko00770//Pantothenate and CoA biosynthesis	Metabolism of other amino acids;Metabolism of cofactors and vitamins;Nucleotide metabolism;Global and Overview	Metabolism
pme0398	Chlorogenic acid (3-O-Caffeoylquinic acid)	Quinate and its derivatives	-0.0478586	-1.48866	0.88853	0.0543277	0.354011	2.05376	C00852	C00852	ko01110//Biosynthesis of secondary metabolites;ko00940//Phenylpropanoid biosynthesis;ko00941//Flavonoid biosynthesis;ko00945//Stilbenoid, diarylheptanoid and gingerol biosynthesis	Biosynthesis of other secondary metabolites;Global and Overview	Metabolism
pme0519	D-(+)-Sucrose	Carbohydrates	0.427331	0.641231	0.208068	0.0910917	3.42875	2.84067	-
pme1175	Guanosine	Nucleotide and its derivates	-1.43184	-0.863754	0.0876118	0.0221763	2.84232	1.55454	C00387	C00387	ko01100//Metabolic pathways;ko00230//Purine metabolism	Nucleotide metabolism;Global and Overview	Metabolism
pme1383	Pyridoxine	Vitamins	-1.10679	-1.38003	0.00779034	0.0458738	1.35813	1.17981	C00314	C00314	ko01100//Metabolic pathways;ko01120//Microbial metabolism in diverse environments;ko00750//Vitamin B6 metabolism	Metabolism of cofactors and vitamins;Global and Overview	Metabolism
pme1816	Neochlorogenic acid (5-O-Caffeoylquinic acid)	Quinate and its derivatives	-0.102767	-1.41432	0.777173	0.0538639	0.709026	1.90343	C17147
pme2033	L(-)-Malic acid	Organic acids	-0.903107	0.848728	0.00593298	0.078005	4.0187	2.93807	C00497	C00497	ko00650//Butanoate metabolism	Carbohydrate metabolism	Metabolism
pme2277	3-Aminosalicylic acid	Organic acids	0.26092	1.41054	0.481744	0.206543	0.553988	1.00241	-
pme2594	4-Pyridoxic acid	Pyridine derivatives	0.119299	0.997493	0.798367	0.144924	1.14299	4.66451	C00847	C00847	ko01100//Metabolic pathways;ko01120//Microbial metabolism in diverse environments;ko00750//Vitamin B6 metabolism	Global and Overview;Metabolism of cofactors and vitamins	Metabolism
pme2634	Dl-Norvaline	Amino acids	0.105785	-0.290063	0.670716	0.0387557	0.699099	1.34113	C01826
pme2898	Dihydromyricetin	Flavonol	1.67651	1.49323	0.126733	0.0606496	1.83475	1.3045	C02906	C02906	ko01110//Biosynthesis of secondary metabolites;ko00941//Flavonoid biosynthesis	Biosynthesis of other secondary metabolites;Global and Overview	Metabolism
pme2901	1-O-Caffeoyl quinic acid	Quinate and its derivatives	-0.0862148	-1.39623	0.839272	0.0538639	0.581484	2.00966	-
pme2909	(-)-Sinigrin hydrate	Others	0.126809	-6.16421	0.867111	0.0543277	0.206053	11.6077	-
pme3130	Quercetin 4'-O-glucoside (Spiraeoside)	Flavonol	-1.59951	1.0488	0.391022	0.122332	1.90788	1.63486	-
pme3212	Quercetin 3-O-glucoside (Isotrifoliin)	Flavonol	0.744298	0.942631	0.318266	0.121354	1.75621	1.69297	C05623	C05623	ko01100//Metabolic pathways;ko01110//Biosynthesis of secondary metabolites;ko00944//Flavone and flavonol biosynthesis	Global and Overview;Biosynthesis of other secondary metabolites	Metabolism
pme3246	Coniferin	Hydroxycinnamoyl derivatives	0.122304	-1.52691	0.662406	0.0910917	0.355853	1.01981	C00761	C00761	ko00940//Phenylpropanoid biosynthesis	Biosynthesis of other secondary metabolites	Metabolism
pma0249	Selgin 5-O-hexoside	Flavone	0.726095	1.70206	0.0646852	0.279302	1.49883	4.29503	-
pma0461	14,15-Dehydrocrepenynic acid	Lipids_Fatty acids	-1.04791	-0.370224	0.0268621	0.460729	1.71667	0.609077	-
pmb0464	Aspartic acid di-O-glucoside	Amino acid derivatives	0.706512	0.392772	0.179743	0.345399	3.50897	1.59176	-
pmb0484	Choline	Cholines	-0.14439	0.0667191	0.141014	0.800386	1.42017	0.392263	C00114	C00114	ko01100//Metabolic pathways;ko02010//ABC transporters;ko00260//Glycine, serine and threonine metabolism;ko00564//Glycerophospholipid metabolism	Global and Overview;Membrane transport;Lipid metabolism;Amino acid metabolism	Environmental Information Processing;Metabolism
pmb0492	N',N",N"'-p-coumaroyl-cinnamoyl-caffeoyl spermidine	Phenolamides	1.33507	0.412169	0.214386	0.644049	1.37778	0.413585	-
pmb0615	Hesperetin C-hexosyl-O-hexosyl-O-hexoside	Flavone C-glycosides	0.615929	0.523643	0.0646852	0.378928	1.58158	1.05162	-
pmb0824	Syringic acid O-feruloyl-O-hexoside	Benzoic acid derivatives	0.791571	0.510416	0.208068	0.537304	1.04149	0.314522	-
pmb0855	LysoPC 16:0	Lipids_Glycerophospholipids	0.621959	0.544268	0.0766245	1	3.88056	1.76818	-
pmb0873	LysoPC 18:2 (2n isomer)	Lipids_Glycerophospholipids	0.730046	0.496889	0.0710557	0.319027	1.95069	0.887654	-
pmb0874	LysoPE 18:2 (2n isomer)	Lipids_Glycerophospholipids	1.19448	0.199141	0.0128617	0.805323	5.04834	0.375361	-
pmb0882	LysoPC 18:1	Lipids_Glycerophospholipids	0.716105	-0.26764	0.00772464	0.494278	1.95257	0.449583	-
pmb2319	LysoPC 15:0	Lipids_Glycerophospholipids	0.704181	0.653695	0.00800064	0.067542	1.0233	0.525123	-
pmb2325	MAG (18:3) isomer2	Lipids_Glycerolipids	-1.38121	0.532906	0.179743	0.601511	1.16665	0.39095	-
pmb2922	Uridine 5'-diphospho-D-glucose	Nucleotide and its derivates	0.535519	-0.153323	0.245664	0.666841	1.05493	0.265895	C00029	C00029	ko01100//Metabolic pathways;ko01130//Biosynthesis of antibiotics;ko00240//Pyrimidine metabolism;ko00052//Galactose metabolism;ko00500//Starch and sucrose metabolism;ko00908//Zeatin biosynthesis;ko00053//Ascorbate and aldarate metabolism;ko00040//Pentose and glucuronate interconversions;ko00520//Amino sugar and nucleotide sugar metabolism;ko00561//Glycerolipid metabolism	Lipid metabolism;Carbohydrate metabolism;Global and Overview;Metabolism of terpenoids and polyketides;Nucleotide metabolism	Metabolism
pmb2940	1-O-beta-D-Glucopyranosyl sinapate	Hydroxycinnamoyl derivatives	0.597426	-0.285022	0.0554771	0.537304	2.09947	0.411671	-
pmb3117	LysoPE 16:0	Lipids_Glycerophospholipids	0.664875	-0.0612076	0.164169	0.831935	3.36359	0.272994	-
pmb3121	LysoPE 18:1	Lipids_Glycerophospholipids	1.17026	-0.307759	0.0160382	0.465365	1.85187	0.334275	-
pmd0160	LysoPE 16:0 (2n isomer)	Lipids_Glycerophospholipids	0.676281	-0.116707	0.166811	0.649407	4.52805	0.632309	-
pme0011	L-Aspartic acid	Amino acids	1.15821	0.421415	0.0818512	0.447809	2.04546	0.89155	C00049	C00049	ko01100//Metabolic pathways;ko01110//Biosynthesis of secondary metabolites;ko01120//Microbial metabolism in diverse environments;ko01130//Biosynthesis of antibiotics;ko01230//Biosynthesis of amino acids;ko02010//ABC transporters;ko00970//AminoacyltRNA biosynthesis;ko01210//2Oxocarboxylic acid metabolism;ko01200//Carbon metabolism;ko00270//Cysteine and methionine metabolism;ko00260//Glycine, serin…	Metabolism of cofactors and vitamins;Translation;Global and Overview;Amino acid metabolism;Biosynthesis of other secondary metabolites;Metabolism of other amino acids;Membrane transport;Energy metabolism	Metabolism;Environmental Information Processing;Genetic Information Processing
pme0013	L-Glutamic acid	Amino acids	-0.601371	-0.322873	0.0646852	0.393766	3.13182	1.40289	C00025	C00025	ko01100//Metabolic pathways;ko01110//Biosynthesis of secondary metabolites;ko01120//Microbial metabolism in diverse environments;ko01130//Biosynthesis of antibiotics;ko01230//Biosynthesis of amino acids;ko02010//ABC transporters;ko00970//AminoacyltRNA biosynthesis;ko00330//Arginine and proline metabolism;ko01210//2Oxocarboxylic acid metabolism;ko01200//Carbon metabolism;ko00480//Glutathione metab…	Global and Overview;Translation;Metabolism of cofactors and vitamins;Amino acid metabolism;Biosynthesis of other secondary metabolites;Membrane transport;Metabolism of other amino acids;Energy metabolism;Carbohydrate metabolism	Environmental Information Processing;Genetic Information Processing;Metabolism
pme0022	L-Threonine	Amino acids	-0.892575	-0.136721	0.229783	0.833676	1.09021	0.166118	C00188	C00188	ko01100//Metabolic pathways;ko01110//Biosynthesis of secondary metabolites;ko01120//Microbial metabolism in diverse environments;ko01130//Biosynthesis of antibiotics;ko01230//Biosynthesis of amino acids;ko02010//ABC transporters;ko00970//AminoacyltRNA biosynthesis;ko00260//Glycine, serine and threonine metabolism;ko00261//Monobactam biosynthesis;ko00290//Valine, leucine and isoleucine biosynthesi…	Global and Overview;Membrane transport;Metabolism of cofactors and vitamins;Translation;Biosynthesis of other secondary metabolites;Amino acid metabolism	Environmental Information Processing;Genetic Information Processing;Metabolism
pme0038	Cytosine	Nucleotide and its derivates	-1.19978	-0.852173	0.0104977	0.0452013	1.316	0.744479	C00380	C00380	ko01100//Metabolic pathways;ko00240//Pyrimidine metabolism	Nucleotide metabolism;Global and Overview	Metabolism
pme0233	Kynurenic acid	Organic acids	-0.489221	0.174057	0.248359	0.807833	1.86228	0.429798	C01717	C01717	ko01100//Metabolic pathways;ko00380//Tryptophan metabolism	Global and Overview;Amino acid metabolism	Metabolism
pme0285	4-Guanidinobutyric acid	Organic acids	-0.551713	-0.985749	0.208068	0.458539	2.28561	1.41544	C01035	C01035	ko01100//Metabolic pathways;ko00330//Arginine and proline metabolism	Amino acid metabolism;Global and Overview	Metabolism
pme0442	Delphinidin	Anthocyanins	1.38569	0.702485	0.00593298	0.0606496	2.90363	0.918345	C05908	C05908	ko01110//Biosynthesis of secondary metabolites;ko00941//Flavonoid biosynthesis;ko00942//Anthocyanin biosynthesis	Global and Overview;Biosynthesis of other secondary metabolites	Metabolism
pme0486	Methylmalonic acid	Organic acids	-1.01307	-0.0596548	0.0842832	0.773545	4.14352	0.41075	C02170	C02170	ko00240//Pyrimidine metabolism;ko00280//Valine, leucine and isoleucine degradation;ko00640//Propanoate metabolism	Carbohydrate metabolism;Amino acid metabolism;Nucleotide metabolism	Metabolism
pme0496	Nicotinic acid	Nicotinic acid derivatives	-1.82036	-0.773831	0.0141079	0.21588	1.17592	0.505162	C00253	C00253	ko01100//Metabolic pathways;ko01110//Biosynthesis of secondary metabolites;ko01120//Microbial metabolism in diverse environments;ko00760//Nicotinate and nicotinamide metabolism;ko00960//Tropane, piperidine and pyridine alkaloid biosynthesis	Global and Overview;Metabolism of cofactors and vitamins;Biosynthesis of other secondary metabolites	Metabolism
pme1097	Adenine	Nucleotide and its derivates	-0.989065	-0.199179	0.181985	0.297674	1.76197	0.39868	C00147	C00147	ko01100//Metabolic pathways;ko00230//Purine metabolism;ko00908//Zeatin biosynthesis	Global and Overview;Metabolism of terpenoids and polyketides;Nucleotide metabolism	Metabolism
pme1109	Guanine	Nucleotide and its derivates	-0.400703	0.111693	0.181985	0.899424	1.19668	0.210211	C00242	C00242	ko01100//Metabolic pathways;ko00230//Purine metabolism	Nucleotide metabolism;Global and Overview	Metabolism
pme1218	2-Picolinic acid	Organic acids	-1.20246	-0.627709	0.0525116	0.345399	1.48499	0.691136	C10164	C10164	ko01100//Metabolic pathways;ko00380//Tryptophan metabolism	Amino acid metabolism;Global and Overview	Metabolism
pme1294	Xanthosine	Nucleotide and its derivates	-1.13592	-0.408586	0.00593298	0.447809	1.12021	0.368829	C01762	C01762	ko01100//Metabolic pathways;ko01110//Biosynthesis of secondary metabolites;ko00230//Purine metabolism;ko00232//Caffeine metabolism	Biosynthesis of other secondary metabolites;Global and Overview;Nucleotide metabolism	Metabolism
pme1363	Nicotinic acid adenine dinucleotide	Nucleotide and its derivates	0.601291	0.430529	0.0834167	0.146005	1.39087	0.778159	C00003	C00857	ko01100//Metabolic pathways;ko00760//Nicotinate and nicotinamide metabolism	Metabolism of cofactors and vitamins;Global and Overview	Metabolism
pme1830	Succinic acid	Organic acids	-1.00991	-0.0370716	0.0710557	0.86287	4.34577	0.242283	C00042	C00042	ko01100//Metabolic pathways;ko01110//Biosynthesis of secondary metabolites;ko01120//Microbial metabolism in diverse environments;ko01130//Biosynthesis of antibiotics;ko01200//Carbon metabolism;ko01220//Degradation of aromatic compounds;ko00350//Tyrosine metabolism;ko00760//Nicotinate and nicotinamide metabolism;ko00360//Phenylalanine metabolism;ko00250//Alanine, aspartate and glutamate metabolism…	Energy metabolism;Amino acid metabolism;Carbohydrate metabolism;Global and Overview;Metabolism of cofactors and vitamins	Metabolism
pme2122	Histamine	Amino acid derivatives	-1.21938	-0.664507	0.00772464	0.0543277	1.32741	0.674126	C00388	C00388	ko01100//Metabolic pathways;ko01110//Biosynthesis of secondary metabolites;ko00340//Histidine metabolism	Global and Overview;Amino acid metabolism	Metabolism
pme2169	Fumaric acid	Organic acids	-0.904816	0.303267	0.0160382	0.65867	2.23909	0.612632	C00122	C00122	ko01100//Metabolic pathways;ko01110//Biosynthesis of secondary metabolites;ko01120//Microbial metabolism in diverse environments;ko01130//Biosynthesis of antibiotics;ko01200//Carbon metabolism;ko01220//Degradation of aromatic compounds;ko00350//Tyrosine metabolism;ko00760//Nicotinate and nicotinamide metabolism;ko00360//Phenylalanine metabolism;ko00250//Alanine, aspartate and glutamate metabolism…	Global and Overview;Metabolism of cofactors and vitamins;Energy metabolism;Carbohydrate metabolism;Amino acid metabolism	Metabolism
pme2427	N-Acetyl-L-tyrosine	Amino acid derivatives	-0.619232	-0.0682409	0.246128	0.864653	1.88104	0.231832	-
pme3096	Aminomalonic acid	Organic acids	-1.00798	-0.0145974	0.0818512	0.966379	2.87729	0.0770414	C00872
pme3160	D-Glucose 6-phosphate	Carbohydrates	1.65749	0.684021	0.00593298	0.382462	3.41396	1.06516	C00092	C00092	ko01100//Metabolic pathways;ko01130//Biosynthesis of antibiotics;ko00500//Starch and sucrose metabolism;ko00562//Inositol phosphate metabolism	Carbohydrate metabolism;Global and Overview	Metabolism
pme3313	D-Fructose 6-phosphate	Carbohydrates	1.55065	0.748485	0.00593298	0.319027	1.65739	0.580142	C00085	C00085	ko01100//Metabolic pathways;ko01120//Microbial metabolism in diverse environments;ko01200//Carbon metabolism;ko00500//Starch and sucrose metabolism;ko00710//Carbon fixation in photosynthetic organisms	Energy metabolism;Carbohydrate metabolism;Global and Overview	Metabolism
pme3835	Guanosine 3',5'-cyclic monophosphate	Nucleotide and its derivates	-2.15991	-1.80888	0.0525116	0.0664367	1.10924	0.617774	C00942	C00942	ko00230//Purine metabolism	Nucleotide metabolism	Metabolism
