# Supplementary material for: Characterization of cold stress responses in different rapeseed ecotypes based on metabolomics and transcriptomics analyses
Source: PeerJ. 2020 Mar 31;8:e8704. doi: 10.7717/peerj.8704 (PMC7120054; doi:10.7717/peerj.8704)
Supplement: Supplemental Information 15 [file peerj-08-8704-s015.xlsx]

## Sheet: S13
Table S13 Correlation coefficents of top 50 DEGs and DEMs based on pairwise correlations analysis.
	pme2909	pmb0595	pma6639	pmb3061	pme3835	pme0038	pmb3064	pme1383	pmb0382	pmb0852	pma0249	pmb3068	pma6460	pme0442	pme2122	pmb3121	pmb3074	pme3313	pme3609	pme1175	pmb0588	pme3160	pmb2940	pma2987	pmb0874	pmb2319	pme2033	pme0050	pme1294	pmb0660	pme0496	pme2594	pmb3117	pme1363	pmb0855	pmb1912	pmb0865	pmb0882	pmd0160	pme1097	pme2898	pme0026	pme0486	pme0193	pme2277	pmb0818	pme0030	pme1830	pme1816
BnaA04g27890D	0.999596	-0.212977	-0.208766	0.942466	0.298517	0.479078	0.979181	0.850277	0.194103	-0.500022	-0.0731723	0.792752	0.865943	-0.503047	0.460473	-0.33214	0.807566	-0.45865	0.246768	0.410298	0.102916	-0.423665	-0.450924	0.741268	-0.438487	-0.646664	-0.279213	0.717785	0.270314	0.118631	0.422632	-0.360239	-0.446288	-0.484572	-0.616507	-0.44073	-0.538217	-0.278084	-0.426588	-0.190604	-0.463307	0.748396	0.133055	0.727687	-0.613115	0.832703	0.735249	0.110089	-0.190657
BnaA07g35960D	0.998945	-0.209218	-0.20516	0.948666	0.30527	0.482361	0.975698	0.852619	0.207557	-0.506908	-0.0661571	0.803246	0.877986	-0.508901	0.463513	-0.341627	0.812391	-0.462256	0.265772	0.411236	0.125449	-0.426778	-0.461445	0.768199	-0.447421	-0.655351	-0.277388	0.724971	0.280615	0.128312	0.419457	-0.35047	-0.456799	-0.477533	-0.626339	-0.448816	-0.541136	-0.289588	-0.436309	-0.193646	-0.459941	0.754913	0.137453	0.735102	-0.61084	0.844319	0.742741	0.115292	-0.202302
BnaA02g07900D	0.998816	-0.202158	-0.197949	0.942371	0.310015	0.494969	0.978536	0.85993	0.207551	-0.523952	-0.06207	0.8019	0.873402	-0.527299	0.478916	-0.358876	0.81271	-0.484945	0.260805	0.420852	0.121323	-0.450338	-0.474716	0.755038	-0.462467	-0.666456	-0.258246	0.709219	0.290085	0.130731	0.436262	-0.343726	-0.469528	-0.497028	-0.635774	-0.456855	-0.559177	-0.303959	-0.449673	-0.179958	-0.468431	0.75032	0.156723	0.729763	-0.611686	0.828055	0.74516	0.134646	-0.205799
BnaC03g74100D	0.998815	-0.209259	-0.205212	0.948548	0.305651	0.482725	0.975324	0.852697	0.207518	-0.506947	-0.0660905	0.803307	0.878167	-0.508901	0.463822	-0.341754	0.812285	-0.462449	0.265914	0.411396	0.125889	-0.426959	-0.461688	0.769251	-0.447531	-0.655397	-0.277331	0.724648	0.280759	0.128192	0.41951	-0.350156	-0.456967	-0.477452	-0.626437	-0.448697	-0.541055	-0.289685	-0.43643	-0.193554	-0.45984	0.755082	0.137664	0.735299	-0.610638	0.844551	0.743281	0.115575	-0.202483
BnaC08g05280D	0.998782	-0.205235	-0.201011	0.937172	0.286661	0.473352	0.981009	0.845419	0.193177	-0.497028	-0.0662285	0.790528	0.860704	-0.502904	0.455994	-0.333043	0.809762	-0.457253	0.241246	0.405148	0.0958547	-0.422347	-0.453418	0.725964	-0.43859	-0.641431	-0.269657	0.702077	0.257842	0.119754	0.421993	-0.355719	-0.448187	-0.485018	-0.614542	-0.444508	-0.531918	-0.276183	-0.428932	-0.193406	-0.456455	0.737525	0.129513	0.716743	-0.604927	0.818717	0.725901	0.106469	-0.195369
BnaA08g24430D	-0.24999	0.998573	0.998182	-0.0576918	-0.463659	-0.405219	-0.137116	-0.44682	0.78325	-0.147741	0.962544	0.263614	0.115011	-0.218542	-0.347472	-0.336661	0.297688	-0.0337762	0.619453	-0.368557	0.621382	-0.0382422	-0.513093	-0.0845022	-0.242546	-0.10968	0.753286	-0.426292	-0.312901	0.881929	-0.359611	0.892483	-0.36857	0.272951	-0.264565	-0.536557	0.316101	-0.446833	-0.374056	-0.358117	0.430874	-0.473974	0.0230218	-0.472259	0.823391	-0.368254	-0.334747	0.0103334	-0.695307
BnaA08g21400D	0.998463	-0.205901	-0.201483	0.94471	0.28701	0.466695	0.984282	0.844451	0.203567	-0.50063	-0.0678901	0.794201	0.863669	-0.50492	0.450029	-0.333812	0.811294	-0.453009	0.253123	0.402879	0.102968	-0.418216	-0.449808	0.720858	-0.439564	-0.647032	-0.275619	0.724764	0.268362	0.128853	0.416806	-0.359921	-0.447225	-0.480111	-0.617197	-0.44915	-0.538501	-0.281452	-0.428619	-0.195507	-0.459958	0.741463	0.128177	0.720593	-0.61252	0.826149	0.71839	0.103703	-0.193946
XLOC_080789	0.998394	-0.204882	-0.200523	0.939213	0.283601	0.468015	0.983563	0.843487	0.196444	-0.497239	-0.0671524	0.790237	0.859222	-0.502901	0.451301	-0.331932	0.810013	-0.453949	0.243585	0.402765	0.0947003	-0.419211	-0.449947	0.715726	-0.437532	-0.642032	-0.271592	0.710622	0.259725	0.123318	0.419468	-0.358893	-0.446088	-0.483489	-0.613876	-0.446266	-0.533894	-0.276755	-0.427411	-0.194498	-0.457719	0.736587	0.12738	0.715593	-0.60802	0.818294	0.718695	0.103394	-0.19335
BnaC03g40220D	0.998182	-0.208028	-0.204027	0.942534	0.301476	0.483148	0.974415	0.850983	0.200328	-0.503135	-0.065403	0.798669	0.872818	-0.506508	0.464292	-0.339443	0.810553	-0.462758	0.256015	0.410742	0.116928	-0.427366	-0.461128	0.762042	-0.445012	-0.649861	-0.273197	0.710495	0.271744	0.122761	0.421767	-0.349324	-0.455248	-0.480573	-0.622518	-0.44566	-0.53618	-0.284651	-0.434723	-0.192537	-0.457412	0.749417	0.136462	0.729485	-0.605992	0.835762	0.742245	0.114771	-0.201474
BnaA09g46340D	-0.261631	0.998133	0.997744	-0.0667898	-0.453828	-0.400764	-0.147313	-0.451053	0.780427	-0.14881	0.959784	0.252695	0.10538	-0.218818	-0.34314	-0.337433	0.287905	-0.0346551	0.616817	-0.360512	0.619726	-0.0387931	-0.50639	-0.0925718	-0.241473	-0.10921	0.757522	-0.426046	-0.304344	0.880812	-0.35524	0.888126	-0.365243	0.270265	-0.260537	-0.528529	0.313471	-0.447341	-0.371269	-0.343088	0.424393	-0.477773	0.0297592	-0.475382	0.826137	-0.373934	-0.344541	0.0168917	-0.686577
BnaA09g46290D	-0.258559	0.998063	0.997887	-0.0637238	-0.449646	-0.398933	-0.146269	-0.453345	0.771491	-0.139115	0.954614	0.24646	0.101984	-0.206449	-0.345972	-0.317663	0.284462	-0.0299401	0.603007	-0.359726	0.603074	-0.0331731	-0.491126	-0.0977992	-0.222112	-0.103521	0.743336	-0.416587	-0.314409	0.879462	-0.360868	0.878968	-0.345722	0.261944	-0.248331	-0.513201	0.319182	-0.430103	-0.351469	-0.341416	0.41071	-0.473091	0.0205911	-0.471635	0.827781	-0.367071	-0.338394	0.00633713	-0.669234
BnaA09g53800D	0.998028	-0.185642	-0.181323	0.964924	0.306474	0.473046	0.979153	0.848351	0.244195	-0.522058	-0.0443376	0.821762	0.894435	-0.522506	0.456278	-0.354702	0.825813	-0.466257	0.301955	0.407617	0.158483	-0.430578	-0.474191	0.778716	-0.458575	-0.674237	-0.269854	0.753778	0.295358	0.16585	0.407964	-0.333011	-0.46844	-0.46852	-0.643355	-0.467292	-0.549254	-0.31308	-0.44828	-0.203141	-0.460407	0.760204	0.144564	0.740207	-0.60442	0.859084	0.739369	0.120143	-0.217383
BnaC02g45720D	0.997789	-0.212191	-0.208031	0.962151	0.309207	0.47349	0.976352	0.850845	0.22528	-0.509543	-0.0678316	0.812079	0.887896	-0.508555	0.453769	-0.341558	0.815222	-0.452002	0.289959	0.406047	0.144963	-0.416223	-0.457267	0.779048	-0.448198	-0.662951	-0.29029	0.761372	0.296879	0.141597	0.407307	-0.354026	-0.456347	-0.463243	-0.630934	-0.455168	-0.545904	-0.296655	-0.43607	-0.200941	-0.461614	0.765524	0.13242	0.746349	-0.619563	0.863848	0.73773	0.108948	-0.204474
BnaC06g12640D	0.997759	-0.217299	-0.213251	0.945012	0.322994	0.492652	0.972781	0.858797	0.197148	-0.509326	-0.07496	0.796412	0.874198	-0.51167	0.475214	-0.341797	0.806117	-0.468367	0.255195	0.428236	0.120829	-0.433238	-0.454469	0.768514	-0.44669	-0.655879	-0.279034	0.729627	0.290338	0.118676	0.434017	-0.361237	-0.452096	-0.48383	-0.624297	-0.434882	-0.547741	-0.289435	-0.431631	-0.178885	-0.469171	0.763663	0.154871	0.743319	-0.619764	0.851924	0.752245	0.132342	-0.188674
XLOC_006809	0.997721	-0.1946	-0.1903	0.963843	0.29963	0.466936	0.982953	0.846414	0.238737	-0.516996	-0.0519156	0.816483	0.88822	-0.518011	0.448993	-0.350621	0.824534	-0.45514	0.297652	0.403358	0.147664	-0.419623	-0.465951	0.760635	-0.45594	-0.668577	-0.2734	0.757232	0.293158	0.157928	0.407838	-0.3457	-0.464217	-0.466598	-0.637836	-0.468421	-0.546024	-0.306491	-0.444896	-0.20359	-0.460997	0.755562	0.134811	0.735933	-0.609625	0.852819	0.725032	0.110154	-0.214114
XLOC_052231	0.997299	-0.211817	-0.207745	0.959259	0.31667	0.48296	0.97298	0.855185	0.22294	-0.514635	-0.0670822	0.812336	0.88936	-0.51317	0.463655	-0.34697	0.813772	-0.461936	0.288375	0.412949	0.148368	-0.426227	-0.463429	0.790155	-0.452886	-0.666666	-0.285646	0.752818	0.301223	0.139342	0.413876	-0.349355	-0.460863	-0.468945	-0.634469	-0.453814	-0.550317	-0.30093	-0.44005	-0.194853	-0.463673	0.767173	0.141349	0.747943	-0.618497	0.863835	0.747289	0.118853	-0.205411
BnaA03g20510D	-0.252792	0.997198	0.997288	-0.0587803	-0.436161	-0.382989	-0.141919	-0.444285	0.766869	-0.147334	0.948773	0.245632	0.104088	-0.209992	-0.331301	-0.314908	0.283172	-0.0455292	0.595937	-0.34643	0.595102	-0.0479983	-0.490403	-0.0931852	-0.219786	-0.114204	0.73748	-0.410008	-0.306001	0.881079	-0.354111	0.873996	-0.341465	0.241398	-0.25063	-0.505672	0.30582	-0.429109	-0.346976	-0.32916	0.390385	-0.466903	0.0253122	-0.466335	0.823228	-0.36206	-0.328492	0.010588	-0.655011
XLOC_045377	0.997261	-0.211594	-0.207557	0.957461	0.316243	0.48408	0.972325	0.855167	0.220597	-0.513693	-0.066746	0.811301	0.888379	-0.512613	0.464665	-0.346631	0.81334	-0.462648	0.285551	0.413253	0.146418	-0.42693	-0.463961	0.790353	-0.452492	-0.665241	-0.284295	0.747825	0.298699	0.137366	0.414913	-0.348576	-0.460858	-0.470007	-0.633671	-0.452769	-0.54879	-0.299616	-0.43994	-0.194411	-0.462868	0.766008	0.141462	0.74678	-0.61682	0.861821	0.748416	0.119237	-0.205553
BnaC05g00290D	0.997197	-0.212045	-0.208024	0.9566	0.315147	0.483503	0.971838	0.854486	0.218904	-0.512135	-0.0672378	0.810422	0.88755	-0.51092	0.463923	-0.344763	0.812584	-0.461769	0.283673	0.412268	0.144798	-0.426184	-0.463171	0.789997	-0.450935	-0.663693	-0.284991	0.745895	0.296664	0.135885	0.4143	-0.34832	-0.459363	-0.469811	-0.632412	-0.451431	-0.547014	-0.297817	-0.438377	-0.195482	-0.462136	0.765379	0.140246	0.746025	-0.616126	0.861175	0.749242	0.118141	-0.204847
BnaA01g22550D	-0.263803	0.997155	0.99644	-0.0688752	-0.458385	-0.402571	-0.147899	-0.450747	0.785881	-0.153276	0.964997	0.256977	0.108249	-0.225426	-0.34425	-0.350312	0.292529	-0.0324471	0.62727	-0.36343	0.630497	-0.0372395	-0.517219	-0.0879572	-0.254992	-0.110777	0.769434	-0.435681	-0.300976	0.879189	-0.351279	0.892997	-0.378938	0.27735	-0.268128	-0.541494	0.316198	-0.45691	-0.385052	-0.346972	0.434185	-0.482559	0.0315579	-0.479167	0.82898	-0.379727	-0.349812	0.0202241	-0.702526
BnaCnng56050D	0.997004	-0.176811	-0.173008	0.963269	0.26024	0.437739	0.982945	0.833923	0.263257	-0.512602	-0.0234136	0.837356	0.901366	-0.520241	0.425786	-0.368093	0.841565	-0.441759	0.326673	0.372493	0.180811	-0.407592	-0.494367	0.776137	-0.473616	-0.661372	-0.252544	0.727494	0.271905	0.17116	0.388554	-0.310371	-0.490502	-0.430474	-0.650727	-0.501944	-0.523307	-0.322065	-0.470555	-0.241065	-0.411524	0.736439	0.121632	0.717898	-0.590825	0.840709	0.714298	0.0995932	-0.260978
BnaC07g09660D	0.997002	-0.216476	-0.21195	0.950996	0.301165	0.473981	0.982043	0.849909	0.207059	-0.508753	-0.0793457	0.795044	0.867035	-0.507558	0.455178	-0.334022	0.805816	-0.456744	0.262584	0.406821	0.109957	-0.422239	-0.446395	0.731484	-0.441324	-0.657779	-0.287536	0.749016	0.290916	0.129944	0.416619	-0.366062	-0.445102	-0.483768	-0.620892	-0.447835	-0.553124	-0.286699	-0.426468	-0.190086	-0.473978	0.753139	0.131087	0.732284	-0.625118	0.838446	0.724518	0.106415	-0.186743
BnaC01g05290D	0.99696	-0.212138	-0.207949	0.963487	0.316623	0.478815	0.97485	0.854401	0.228946	-0.516597	-0.0680647	0.814265	0.890805	-0.514231	0.459943	-0.347281	0.814537	-0.459279	0.295144	0.411466	0.152258	-0.423649	-0.461116	0.786517	-0.453301	-0.669754	-0.289075	0.765989	0.3072	0.144655	0.410749	-0.351871	-0.460124	-0.466032	-0.635828	-0.456469	-0.554061	-0.30388	-0.439716	-0.196076	-0.465656	0.769214	0.140442	0.749924	-0.62287	0.867855	0.742508	0.117086	-0.204454
BnaC08g40390D	-0.262458	0.996792	0.99604	-0.0668772	-0.452894	-0.398642	-0.145004	-0.45287	0.778915	-0.146205	0.963802	0.250314	0.104596	-0.21825	-0.346212	-0.338874	0.294131	-0.0234925	0.617902	-0.358852	0.614861	-0.0268953	-0.505476	-0.0973817	-0.244611	-0.106261	0.766469	-0.430676	-0.309366	0.876551	-0.349391	0.878832	-0.368253	0.269678	-0.260278	-0.53248	0.326395	-0.443436	-0.374647	-0.34211	0.420737	-0.481497	0.0227082	-0.477581	0.83619	-0.378279	-0.355316	0.0104739	-0.69268
BnaC09g00910D	0.996751	-0.209261	-0.205077	0.935323	0.301877	0.503679	0.978856	0.863037	0.19879	-0.528436	-0.0690527	0.795212	0.866598	-0.526436	0.48481	-0.362485	0.808349	-0.491555	0.254338	0.421803	0.110102	-0.456359	-0.478379	0.744907	-0.464918	-0.668032	-0.255007	0.690031	0.291317	0.121038	0.438704	-0.349373	-0.470213	-0.514607	-0.631404	-0.466748	-0.566858	-0.300102	-0.450422	-0.164464	-0.478584	0.729612	0.143153	0.709151	-0.614035	0.80528	0.729119	0.123618	-0.203138
BnaA01g31270D	0.996742	-0.216391	-0.212327	0.934317	0.331668	0.518516	0.973142	0.868092	0.185674	-0.524939	-0.0772439	0.787614	0.864576	-0.525839	0.497923	-0.354028	0.802029	-0.493393	0.240529	0.439236	0.102393	-0.458064	-0.46662	0.757862	-0.458915	-0.666735	-0.260749	0.701329	0.29738	0.11144	0.453386	-0.359304	-0.462887	-0.517296	-0.630264	-0.438886	-0.563741	-0.294225	-0.442782	-0.158273	-0.4888	0.755395	0.163104	0.735416	-0.613653	0.825724	0.753309	0.142185	-0.187904
BnaC05g06720D	0.996378	-0.186942	-0.183571	0.94741	0.26714	0.45584	0.983246	0.838008	0.233563	-0.508839	-0.0307447	0.81866	0.885249	-0.518744	0.438919	-0.364913	0.837051	-0.44336	0.294707	0.386737	0.147213	-0.409534	-0.489989	0.756316	-0.47327	-0.652137	-0.237503	0.692381	0.260104	0.143264	0.414052	-0.326452	-0.487098	-0.453035	-0.643239	-0.489311	-0.511881	-0.307708	-0.467527	-0.224864	-0.424283	0.727191	0.12409	0.708986	-0.580963	0.819024	0.713014	0.104009	-0.251644
BnaC06g25530D	0.996299	-0.241569	-0.237232	0.93358	0.31777	0.477548	0.97035	0.847996	0.161342	-0.470477	-0.105925	0.769973	0.846753	-0.482471	0.460099	-0.303176	0.785833	-0.437077	0.212582	0.414557	0.0709156	-0.400624	-0.410997	0.730913	-0.413066	-0.621789	-0.310698	0.739004	0.264084	0.0889681	0.424876	-0.390874	-0.423985	-0.466917	-0.595184	-0.392514	-0.528158	-0.248092	-0.405092	-0.19018	-0.456503	0.778708	0.135098	0.760576	-0.627069	0.850345	0.739517	0.108827	-0.159096
BnaC04g49060D	0.996115	-0.21359	-0.209808	0.955605	0.336661	0.512066	0.976411	0.865838	0.217999	-0.531545	-0.0659247	0.806141	0.885371	-0.531323	0.484907	-0.365004	0.818469	-0.475229	0.285279	0.431206	0.136181	-0.437912	-0.473098	0.783705	-0.471519	-0.680182	-0.262561	0.740008	0.31482	0.134088	0.43992	-0.361207	-0.477386	-0.497765	-0.644362	-0.462324	-0.559691	-0.308131	-0.457372	-0.170561	-0.48995	0.766111	0.149639	0.749383	-0.609055	0.847582	0.739379	0.128328	-0.210693
XLOC_042853	-0.25048	0.995552	0.996094	-0.0583828	-0.439871	-0.391259	-0.14444	-0.440793	0.770287	-0.148782	0.942107	0.25214	0.106789	-0.212674	-0.329944	-0.317216	0.275921	-0.0572225	0.597066	-0.352301	0.606755	-0.0609147	-0.492589	-0.0845412	-0.219154	-0.114941	0.724341	-0.401333	-0.299024	0.884351	-0.362273	0.887037	-0.342467	0.252992	-0.252337	-0.502924	0.287731	-0.437433	-0.347544	-0.335892	0.406467	-0.456825	0.0387894	-0.457805	0.803527	-0.352608	-0.312429	0.0229528	-0.653084
XLOC_041623	0.996059	-0.212484	-0.208273	0.965394	0.318219	0.477845	0.974214	0.854159	0.232368	-0.517883	-0.0683569	0.815586	0.892347	-0.514804	0.458993	-0.347977	0.814426	-0.458458	0.299805	0.411215	0.156505	-0.422828	-0.460721	0.788817	-0.453975	-0.671728	-0.290854	0.772415	0.31139	0.147311	0.409041	-0.351969	-0.460355	-0.463861	-0.636994	-0.457493	-0.555891	-0.306044	-0.439985	-0.196384	-0.466348	0.77108	0.140799	0.75188	-0.624541	0.871178	0.741883	0.117241	-0.204642
BnaA07g11920D	0.996045	-0.230821	-0.227036	0.949843	0.300385	0.459887	0.973917	0.836572	0.188877	-0.466183	-0.0833621	0.786752	0.864871	-0.474714	0.430008	-0.304531	0.807068	-0.406914	0.249135	0.393647	0.0970722	-0.369684	-0.417097	0.744527	-0.413209	-0.619953	-0.30624	0.753306	0.254054	0.106561	0.403514	-0.388909	-0.424498	-0.450192	-0.593966	-0.426317	-0.503426	-0.24866	-0.40477	-0.207764	-0.456045	0.766108	0.104644	0.748732	-0.611945	0.858347	0.725251	0.0799506	-0.187931
XLOC_069616	-0.264115	0.996025	0.995767	-0.0694403	-0.451916	-0.396084	-0.156711	-0.450497	0.778169	-0.154761	0.95305	0.252565	0.105244	-0.215921	-0.338941	-0.329763	0.275495	-0.0490344	0.616151	-0.369408	0.623871	-0.0561981	-0.511906	-0.0759041	-0.237234	-0.116155	0.7478	-0.429112	-0.294872	0.880234	-0.36281	0.907739	-0.35797	0.262719	-0.262727	-0.523117	0.303721	-0.45049	-0.362811	-0.351903	0.419711	-0.472965	0.0328621	-0.473246	0.823223	-0.371741	-0.315742	0.0213498	-0.681699
BnaA08g16140D	0.99598	-0.207426	-0.203201	0.923889	0.283953	0.481962	0.980203	0.84623	0.175862	-0.496445	-0.07092	0.777048	0.847275	-0.50154	0.465699	-0.331903	0.803044	-0.465093	0.219783	0.414906	0.074728	-0.430034	-0.451411	0.705997	-0.43678	-0.636908	-0.260818	0.675229	0.25062	0.106831	0.433528	-0.362059	-0.444769	-0.50219	-0.60804	-0.437474	-0.532085	-0.268495	-0.425971	-0.176816	-0.462612	0.720715	0.129197	0.699533	-0.601083	0.796572	0.714618	0.107331	-0.183979
BnaC01g08450D	0.995946	-0.153574	-0.14933	0.952402	0.262578	0.439744	0.979634	0.831026	0.258345	-0.517069	-0.011283	0.831528	0.891988	-0.526707	0.434355	-0.365355	0.835992	-0.465183	0.304854	0.38002	0.170453	-0.433331	-0.497369	0.758238	-0.466999	-0.660785	-0.238809	0.707583	0.261051	0.179863	0.397228	-0.290294	-0.482176	-0.44596	-0.64874	-0.48717	-0.528908	-0.325884	-0.462163	-0.236555	-0.413756	0.734967	0.150164	0.712405	-0.582812	0.83283	0.73791	0.126084	-0.249989
BnaA04g18060D	0.995797	-0.211913	-0.207957	0.956654	0.31937	0.486515	0.969055	0.855461	0.220916	-0.51409	-0.0662767	0.811781	0.889793	-0.512575	0.466689	-0.347631	0.812264	-0.463811	0.28747	0.414293	0.150566	-0.428012	-0.46559	0.79858	-0.453331	-0.665781	-0.284127	0.746414	0.300535	0.136931	0.414853	-0.346101	-0.462049	-0.468819	-0.634461	-0.451936	-0.548372	-0.300698	-0.440781	-0.193711	-0.462096	0.76743	0.143099	0.748444	-0.615426	0.863987	0.752172	0.121386	-0.206908
BnaC04g07690D	-0.241732	0.995448	0.995733	-0.0459017	-0.419581	-0.370235	-0.131128	-0.434654	0.764444	-0.149133	0.944897	0.248341	0.110933	-0.211758	-0.322531	-0.309662	0.290349	-0.0487925	0.590867	-0.332363	0.585655	-0.0489863	-0.482981	-0.0888445	-0.214592	-0.120587	0.728124	-0.389347	-0.303543	0.883809	-0.347328	0.857356	-0.336357	0.227994	-0.250798	-0.497894	0.300449	-0.422852	-0.341837	-0.320307	0.369967	-0.451534	0.0265157	-0.450622	0.81842	-0.345753	-0.321554	0.00990311	-0.643202
XLOC_033887	0.995621	-0.186067	-0.181765	0.969154	0.30934	0.471627	0.974335	0.848673	0.254618	-0.526116	-0.0435194	0.828705	0.902008	-0.524177	0.455637	-0.35915	0.825151	-0.467634	0.317521	0.404559	0.176923	-0.432033	-0.479069	0.797848	-0.462558	-0.679995	-0.274641	0.764505	0.306323	0.172739	0.400718	-0.32536	-0.472841	-0.459918	-0.648526	-0.472475	-0.554634	-0.321325	-0.452117	-0.206767	-0.456374	0.765032	0.145901	0.745339	-0.608046	0.8688	0.744267	0.121973	-0.223168
XLOC_062682	0.995618	-0.20185	-0.197559	0.92546	0.273364	0.466932	0.980976	0.83816	0.181421	-0.488365	-0.0658126	0.779059	0.846097	-0.497047	0.45051	-0.326189	0.805261	-0.453168	0.222376	0.400198	0.0748103	-0.418733	-0.447239	0.696462	-0.431214	-0.629328	-0.262762	0.681182	0.240294	0.112291	0.423167	-0.357446	-0.441226	-0.489239	-0.604388	-0.439547	-0.523126	-0.26561	-0.422751	-0.19232	-0.45218	0.723079	0.124047	0.701731	-0.597945	0.798026	0.71363	0.100709	-0.19038
BnaC02g13700D	0.9954	-0.209627	-0.205749	0.959675	0.316934	0.483153	0.969959	0.855509	0.230285	-0.518821	-0.0613929	0.818005	0.895016	-0.517624	0.464563	-0.355626	0.816672	-0.463379	0.299645	0.411903	0.162577	-0.427889	-0.472601	0.803968	-0.461375	-0.670181	-0.279649	0.749355	0.305784	0.142683	0.413597	-0.341166	-0.470182	-0.462762	-0.641145	-0.461416	-0.549791	-0.309494	-0.448972	-0.197957	-0.45689	0.766886	0.144628	0.748236	-0.615454	0.865628	0.749492	0.123218	-0.216425
BnaC04g37620D	0.952169	-0.0574585	-0.0532287	0.995394	0.247131	0.38235	0.942465	0.771722	0.414746	-0.545705	0.0855026	0.892978	0.946757	-0.542519	0.366185	-0.39327	0.865673	-0.435576	0.478659	0.306165	0.326295	-0.402923	-0.544735	0.842073	-0.492841	-0.710808	-0.214648	0.799453	0.302552	0.329677	0.29616	-0.183096	-0.520211	-0.36642	-0.698756	-0.56445	-0.510342	-0.400318	-0.499363	-0.312175	-0.385642	0.739553	0.123455	0.721538	-0.50617	0.875292	0.714286	0.0959248	-0.342558
XLOC_104820	0.995277	-0.208585	-0.204048	0.958267	0.298157	0.462845	0.982105	0.845295	0.224534	-0.509691	-0.0696679	0.804257	0.875498	-0.50963	0.446142	-0.339109	0.812433	-0.449642	0.282054	0.402734	0.129695	-0.414732	-0.4491	0.738791	-0.444956	-0.660607	-0.286866	0.76445	0.294511	0.144853	0.407718	-0.360724	-0.450105	-0.468103	-0.625959	-0.456163	-0.550662	-0.295364	-0.431576	-0.197642	-0.465045	0.754896	0.131113	0.734582	-0.623641	0.848683	0.717634	0.105521	-0.19596
BnaC05g37230D	-0.258503	0.994719	0.995224	-0.0650275	-0.458343	-0.410993	-0.154024	-0.455792	0.768151	-0.133508	0.940372	0.246514	0.099228	-0.19469	-0.350402	-0.30031	0.266528	-0.0402837	0.595493	-0.373976	0.605339	-0.0457722	-0.483358	-0.0914597	-0.203821	-0.100355	0.714401	-0.405334	-0.312377	0.881314	-0.382191	0.895353	-0.327327	0.268831	-0.239641	-0.498817	0.303332	-0.426091	-0.332129	-0.352927	0.420301	-0.466289	0.0218772	-0.468406	0.808036	-0.357585	-0.315199	0.00652335	-0.652027
BnaCnng35500D	0.995036	-0.210003	-0.206046	0.925485	0.302481	0.489513	0.971724	0.85137	0.179332	-0.500108	-0.0697268	0.783504	0.85619	-0.507725	0.473453	-0.33867	0.802153	-0.469982	0.228152	0.419609	0.0936042	-0.435711	-0.457524	0.738405	-0.443692	-0.640463	-0.260994	0.682	0.262083	0.105709	0.438988	-0.352992	-0.452201	-0.492219	-0.615875	-0.432471	-0.533989	-0.27834	-0.432254	-0.181194	-0.457047	0.742068	0.149334	0.721359	-0.603139	0.816896	0.74325	0.12791	-0.192075
XLOC_003124	-0.25484	0.995028	0.994494	-0.0601729	-0.429396	-0.377543	-0.139554	-0.44676	0.763767	-0.14205	0.955688	0.24088	0.10115	-0.212243	-0.335895	-0.319635	0.293311	-0.0261415	0.595996	-0.345012	0.585308	-0.027142	-0.487719	-0.102108	-0.22637	-0.107291	0.754492	-0.415583	-0.31424	0.872905	-0.341604	0.857968	-0.349194	0.242395	-0.249915	-0.511374	0.326523	-0.423236	-0.355445	-0.327856	0.385064	-0.464935	0.0195869	-0.461025	0.840012	-0.367752	-0.341322	0.00516833	-0.669122
BnaC09g01430D	0.994924	-0.182963	-0.178258	0.950709	0.275512	0.451689	0.985855	0.83521	0.229811	-0.508157	-0.048333	0.804618	0.869368	-0.512527	0.438569	-0.34183	0.819182	-0.454419	0.275142	0.392635	0.122091	-0.419993	-0.459251	0.71388	-0.445251	-0.655394	-0.26561	0.734564	0.269929	0.157606	0.403836	-0.341344	-0.454288	-0.471631	-0.625942	-0.464712	-0.541005	-0.296745	-0.436309	-0.205944	-0.45279	0.735009	0.129479	0.713516	-0.603545	0.824604	0.707801	0.103193	-0.206672
BnaA10g28230D	0.994834	-0.203952	-0.199373	0.941037	0.278651	0.457724	0.984939	0.838114	0.202823	-0.49692	-0.0686174	0.78838	0.855357	-0.501892	0.442107	-0.329613	0.808328	-0.447064	0.248908	0.397766	0.0945363	-0.412685	-0.442995	0.698354	-0.435021	-0.642297	-0.274865	0.725655	0.264051	0.130013	0.413529	-0.363187	-0.441663	-0.478791	-0.611782	-0.448466	-0.536598	-0.277981	-0.423986	-0.195921	-0.458936	0.734066	0.123761	0.712822	-0.612277	0.817071	0.704897	0.0982115	-0.18967
BnaC06g26580D	0.994805	-0.21464	-0.210421	0.965752	0.290073	0.452908	0.976928	0.84144	0.234775	-0.502361	-0.0690799	0.815371	0.888906	-0.499273	0.435854	-0.336093	0.815109	-0.435666	0.303654	0.389639	0.153301	-0.400186	-0.45365	0.773857	-0.445027	-0.658997	-0.299749	0.771782	0.294683	0.147162	0.388722	-0.352347	-0.454413	-0.444019	-0.629549	-0.462118	-0.538902	-0.295254	-0.434662	-0.216548	-0.446546	0.756707	0.112772	0.737956	-0.621409	0.862915	0.717231	0.0892021	-0.208384
BnaC03g70760D	0.994804	-0.203546	-0.199316	0.930041	0.347258	0.522752	0.982092	0.86892	0.185282	-0.535845	-0.0681588	0.778347	0.854042	-0.544094	0.508592	-0.36478	0.807315	-0.500904	0.229232	0.466385	0.0890575	-0.466225	-0.462329	0.717161	-0.469331	-0.673143	-0.234644	0.704145	0.303485	0.118438	0.483263	-0.372188	-0.467628	-0.529607	-0.638402	-0.42776	-0.566483	-0.305104	-0.45004	-0.140945	-0.50057	0.756935	0.195066	0.736429	-0.607627	0.819991	0.73898	0.170478	-0.176234
XLOC_076519	0.994787	-0.20893	-0.204394	0.959551	0.29921	0.462408	0.981525	0.845535	0.227172	-0.511036	-0.0696451	0.805793	0.877157	-0.51053	0.44595	-0.3405	0.812562	-0.449677	0.285897	0.402571	0.13379	-0.414816	-0.449914	0.741978	-0.446323	-0.662285	-0.287695	0.768071	0.297779	0.146548	0.406751	-0.359921	-0.451267	-0.466204	-0.627457	-0.457502	-0.552211	-0.297668	-0.432702	-0.198152	-0.464661	0.756268	0.131914	0.736032	-0.624957	0.851122	0.717991	0.106326	-0.197063
[truncated: 1 more columns]
