# Supplementary material for: Characterization of cold stress responses in different rapeseed ecotypes based on metabolomics and transcriptomics analyses
Source: PeerJ. 2020 Mar 31;8:e8704. doi: 10.7717/peerj.8704 (PMC7120054; doi:10.7717/peerj.8704)
Supplement: Supplemental Information 16 [file peerj-08-8704-s016.xlsx]

## Sheet: S14
Table S14 Variation of transcript and metabolome.
	Metabolome	Transcript
Joint	0.771	0.855
Orthogonal	0.057	0
Noise	0.171	0.145
