# Supplementary material for: Characterization of cold stress responses in different rapeseed ecotypes based on metabolomics and transcriptomics analyses
Source: PeerJ. 2020 Mar 31;8:e8704. doi: 10.7717/peerj.8704 (PMC7120054; doi:10.7717/peerj.8704)
Supplement: Supplemental Information 17 [file peerj-08-8704-s017.xlsx]

## Sheet: S15
Table S15 Loading coefficients of metabolites used for loading plot based on O2PLS analysis.
	Metabolome	Loading_1	Loading_2	Compounds	Class
Spring
	pme2594	0.15226	0.329658	4-Pyridoxic acid	Pyridine derivatives
	pme3212	0.154975	0.328243	Quercetin 3-O-glucoside (Isotrifoliin)	Flavonol
	pmb2654	0.149992	-0.303335	Anthranilate O-hexosyl-O-hexoside	Benzoic acid derivatives
	pmb0859	-0.144287	-0.255735	LysoPC 18:1 (2n isomer)	Lipids_Glycerophospholipids
	pme3130	0.155186	0.227105	Quercetin 4'-O-glucoside (Spiraeoside)	Flavonol
	pme0020	-0.13978	0.22579	L-Phenylalanine	Amino acids
	pmb2444	0.154407	-0.215297	MAG (18:3) isomer1	Lipids_Glycerolipids
	pme3246	-0.158399	-0.200401	Coniferin	Hydroxycinnamoyl derivatives
	pmb3064	-0.158215	-0.199998	3-O-p-coumaroyl quinic acid O-hexoside	Quinate and its derivatives
	pmb0852	0.156252	-0.195695	LysoPC 18:2	Lipids_Glycerophospholipids
	pme0050	-0.150667	0.186955	L-Tryptophan	Amino acids
	pme0519	0.153568	-0.182405	D-(+)-Sucrose	Carbohydrates
	pme1383	-0.165447	-0.16752	Pyridoxine	Vitamins
	pmb3068	-0.16141	0.166406	1-O-p-Coumaroyl quinic acid	Quinate and its derivatives
	pme2277	0.141796	0.17785	3-Aminosalicylic acid	Organic acids
	pme0257	-0.16657	0.145824	Uracil	Nucleotide and its derivates
	pme2909	-0.164613	-0.147405	(-)-Sinigrin hydrate	Others
	pmc0274	-0.146322	0.165444	6-Methylmercaptopurine	Nucleotide and its derivates
	pmb0818	-0.164732	0.137485	Methoxyindoleacetic acid	Indole derivatives
	pma6460	-0.168103	0.119873	5-O-p-Coumaroylquinic acid	Quinate and its derivatives
	pme0010	-0.157296	0.128427	L-Serine	Amino acids
	pme1175	-0.169135	-0.104811	Guanosine	Nucleotide and its derivates
	pmb0618	0.15082	0.123715	8-C-hexosyl-hesperetin O-hexoside	Flavone C-glycosides
	pmb1656	0.156848	-0.112943	MAG (18:3) isomer4	Lipids_Glycerolipids
	pmb0801	0.16737	0.083177	4-Pyridoxic acid O-hexoside	Vitamins
	pme0030	-0.158655	0.0927457	L-(-)-Tyrosine	Amino acids
	pmb0782	-0.146886	-0.10622	Piperidine	Alkaloids
	pmb3061	-0.167043	0.0502771	5-O-p-coumaroyl quinic acid O-hexoside	Quinate and its derivatives
	pme2634	-0.165893	-0.0514658	Dl-Norvaline	Amino acids
	pme0026	-0.168739	0.0347797	L-(+)-Lysine	Amino acids
	pme0398	-0.16257	-0.0564955	Chlorogenic acid (3-O-Caffeoylquinic acid)	Quinate and its derivatives
	pmb1096	-0.168562	0.0286602	Indole	Indole derivatives
	pme0193	-0.168624	0.0269568	L-Glutamine	Amino acids
	pmb3093	-0.16671	0.00601522	6,7-dihydroxycoumarin 7-O-quinic acid	Coumarins
	pme1816	-0.162712	-0.0316576	Neochlorogenic acid (5-O-Caffeoylquinic acid)	Quinate and its derivatives
	pme2898	0.163535	-0.0247454	Dihydromyricetin	Flavonol
	pme2901	-0.162443	-0.0305899	1-O-Caffeoyl quinic acid	Quinate and its derivatives
	pme2033	0.156767	0.00443078	L(-)-Malic acid	Organic acids
	pmb0890	0.147624	-0.032474	MAG (18:2)	Lipids_Glycerolipids
	pmb0865	0.14008	-0.0492845	LysoPC 18:3 (2n isomer)	Lipids_Glycerophospholipids
Winter
	pme0022	-0.131738	-0.334605	L-Threonine	Amino acids
	pmb0824	0.133653	0.332172	Syringic acid O-feruloyl-O-hexoside	Benzoic acid derivatives
	pmb2325	-0.136632	0.310568	MAG (18:3) isomer2	Lipids_Glycerolipids
	pme1363	0.145067	-0.263204	Nicotinic acid adenine dinucleotide	Nucleotide and its derivates
	pme2427	-0.127984	-0.255197	N-Acetyl-L-tyrosine	Amino acid derivatives
	pme0519	0.130561	-0.230801	D-(+)-Sucrose	Carbohydrates
	pme0486	-0.145021	-0.216958	Methylmalonic acid	Organic acids
	pme0233	-0.128852	-0.224018	Kynurenic acid	Organic acids
	pme1097	-0.135446	0.214411	Adenine	Nucleotide and its derivates
	pme2898	0.140415	-0.201399	Dihydromyricetin	Flavonol
	pme3835	-0.150032	-0.191296	Guanosine 3',5'-cyclic monophosphate	Nucleotide and its derivates
	pme1830	-0.147172	-0.1834	Succinic acid	Organic acids
	pme0011	0.144402	-0.183788	L-Aspartic acid	Amino acids
	pme3096	-0.145249	-0.177412	Aminomalonic acid	Organic acids
	pmb2940	0.149654	-0.169215	1-O-beta-D-Glucopyranosyl sinapate	Hydroxycinnamoyl derivatives
	pmb0873	0.146645	-0.130487	LysoPC 18:2 (2n isomer)	Lipids_Glycerophospholipids
	pmb2319	0.154674	-0.109804	LysoPC 15:0	Lipids_Glycerophospholipids
	pmb0852	0.154856	-0.10575	LysoPC 18:2	Lipids_Glycerophospholipids
	pme3313	0.155971	-0.100933	D-Fructose 6-phosphate	Carbohydrates
	pme3160	0.155368	-0.0906099	D-Glucose 6-phosphate	Carbohydrates
	pmb0865	0.154005	-0.0846615	LysoPC 18:3 (2n isomer)	Lipids_Glycerophospholipids
	pme2169	-0.153761	-0.0741383	Fumaric acid	Organic acids
	pmb0464	0.136752	0.101648	Aspartic acid di-O-glucoside	Amino acid derivatives
	pme0442	0.156178	0.0548999	Delphinidin	Anthocyanins
	pme0038	-0.15527	0.0572641	Cytosine	Nucleotide and its derivates
	pme1218	-0.149584	-0.0694514	2-Picolinic acid	Organic acids
	pme2033	-0.156271	0.0444376	L(-)-Malic acid	Organic acids
	pma0461	-0.15249	-0.0558247	14,15-Dehydrocrepenynic acid	Lipids_Fatty acids
	pme0285	-0.131803	0.0940759	4-Guanidinobutyric acid	Organic acids
	pme2122	-0.155728	0.0432884	Histamine	Amino acid derivatives
	pme1175	-0.144794	0.0710005	Guanosine	Nucleotide and its derivates
	pme1383	-0.155439	0.0409533	Pyridoxine	Vitamins
	pmb0855	0.14683	0.0628289	LysoPC 16:0	Lipids_Glycerophospholipids
	pmb0882	0.154981	0.0325041	LysoPC 18:1	Lipids_Glycerophospholipids
	pme0496	-0.154123	-0.0360497	Nicotinic acid	Nicotinic acid derivatives
	pmd0160	0.139576	0.0746202	LysoPE 16:0 (2n isomer)	Lipids_Glycerophospholipids
	pmb3121	0.154391	-0.0339344	LysoPE 18:1	Lipids_Glycerophospholipids
	pmb3117	0.14	0.0711296	LysoPE 16:0	Lipids_Glycerophospholipids
	pme0013	-0.149555	-0.0441025	L-Glutamic acid	Amino acids
	pme1294	-0.155412	0.00459212	Xanthosine	Nucleotide and its derivates
	pmb0874	0.155043	-0.00298508	LysoPE 18:2 (2n isomer)	Lipids_Glycerophospholipids
	pmb0615	0.14732	0.0481356	Hesperetin C-hexosyl-O-hexosyl-O-hexoside	Flavone C-glycosides
	pmb0484	-0.140979	-0.0527713	Choline	Cholines
	pma0249	0.148683	0.0071228	Selgin 5-O-hexoside	Flavone
	pme1109	-0.13634	-0.0342416	Guanine	Nucleotide and its derivates
	pmb2922	0.125352	-0.0617855	Uridine 5'-diphospho-D-glucose	Nucleotide and its derivates
	pmb0492	0.131915	-0.0127291	N',N",N"'-p-coumaroyl-cinnamoyl-caffeoyl spermidine	Phenolamides
