# Supplementary material for: Characterization of cold stress responses in different rapeseed ecotypes based on metabolomics and transcriptomics analyses
Source: PeerJ. 2020 Mar 31;8:e8704. doi: 10.7717/peerj.8704 (PMC7120054; doi:10.7717/peerj.8704)
Supplement: Supplemental Information 18 [file peerj-08-8704-s018.xlsx]

## Sheet: S16
Table S16 Loading coefficients of genes used for loading plot based on O2PLS analysis.
	Gene	Loading_1	Loading_2	Symbol
Spring
	BnaA05g33810D	0.00536648	-0.0266918	BCA1
	BnaC04g24040D	0.00556831	-0.025044	-
	BnaA05g04890D	0.00538962	-0.024357	FLA8
	BnaC09g48200D	0.0045257	-0.0244942	nep1
	BnaC08g00430D	0.00452649	0.0244826	3AT1
	BnaA06g05310D	0.0039363	0.0245255	NAS3
	BnaC04g53300D	-0.00550858	0.0241643	HSPRO2
	BnaA06g07470D	0.0059005	-0.0240507	RAV1
	BnaC05g19620D	0.00518651	-0.024011	B3GALT17
	BnaA06g29540D	0.00600537	-0.0236614	MYB12
	BnaA07g38770D	0.00600382	-0.0236508	JP650
	BnaA05g37410D	0.00498572	0.0237413	ONAC010
	BnaA03g04590D	0.00492662	-0.0234906	CHS3
	BnaAnng19290D	0.00604596	-0.0232103	YLS3
	BnaC04g10980D	0.00490065	0.0234267	SAT1
	BnaA01g19650D	0.00586121	-0.0229366	GATA6
	BnaA07g27660D	0.0053067	-0.0230573	ACR4
	BnaA09g55490D	-0.005787	0.0225052	BGLU27
	BnaC07g51270D	-0.00604029	0.0224012	ABHD6
	BnaA09g57210D	-0.00420065	0.022813	IKU2
	BnaCnng05410D	0.00617087	-0.0221193	-
	BnaC03g74050D	0.00411752	0.0225859	SAHH2
	XLOC_074605	0.0040518	0.0225067	At3g05500
	BnaC06g21570D	0.00627479	-0.021986	At1g33170
	BnaC01g42060D	0.00350186	0.022525	BAHD1
	BnaC08g48080D	0.00512525	-0.022135	-
	BnaC08g47610D	-0.00595439	0.0218923	TRM32
	BnaA03g02410D	0.00569585	-0.0219506	SCPL35
	BnaA09g47700D	0.00369805	0.0223613	ENDO1
	BnaA01g37210D	-0.00483957	-0.022117	BGAL1
	BnaC01g39850D	0.00471257	0.0220715	At4g25210
	BnaA03g00550D	0.00543534	0.0218358	-
	BnaC03g76300D	0.00521646	0.0218228	At3g60040
	BnaC08g42910D	0.00448265	0.0219822	SUGTL2
	BnaA06g04950D	0.00634204	-0.021448	KN
	BnaA07g04760D	0.00420416	0.0219092	DTXL5
	BnaC07g47890D	0.00420416	0.0219092	DTXL5
	BnaC05g11680D	0.00346838	0.0220348	-
	BnaA02g26670D	-0.00565616	-0.0215673	EXPA15
	BnaA10g23500D	0.00540079	-0.0216154	nep1
	BnaAnng33440D	0.00467876	-0.021752	MLP423
	BnaC04g41430D	0.00635361	-0.0213211	CYP19-1
	BnaA04g18860D	0.00391485	0.0218714	CSLB3
	BnaA03g27820D	0.00541628	-0.0214283	At1g04910
	BnaA03g58310D	-0.00573667	0.0213433	purB
	XLOC_006843	0.00422993	0.0216601	-
	BnaA09g45400D	0.00590981	-0.0212563	NUDT18
	BnaC06g35860D	0.0062962	-0.0211441	-
	BnaA05g03050D	-0.00592335	0.0212202	CSY3
	BnaA06g33260D	-0.00497182	-0.0214371	HMT1
	BnaA09g14900D	0.00421253	0.0215416	SOT18
	BnaA06g20930D	0.00649065	-0.0209631	PME34
	BnaA07g13180D	0.00548788	0.0212205	SAG12
	BnaCnng34700D	-0.00512775	-0.0213023	At5g45670
	BnaA06g08850D	0.00528941	0.0212032	PDCB3
	BnaA07g16330D	-0.00577291	-0.0210446	RPL17
	BnaA09g33560D	0.0063422	-0.0208784	PAL2
	BnaA08g17560D	0.00651309	-0.0208044	PDH-E1
	BnaC03g52730D	0.00412337	0.0213921	MPT2
	BnaA10g09680D	-0.00551095	-0.0210763	PXL2
	BnaC05g38370D	0.0045058	0.0212764	-
	BnaC08g32750D	-0.00543764	-0.0210297	PLP9
	BnaA09g17030D	0.00632034	-0.0207532	At5g44260
	BnaA03g44510D	0.0039777	0.0213192	ctps2
	BnaCnng69860D	0.00405609	0.0212927	CML41
	BnaA07g14860D	-0.00636093	0.0207016	Xylt1
	BnaA05g22530D	0.00383405	0.0212793	At3g17710
	BnaA10g27960D	0.00534371	0.0209413	TPP2
	BnaCnng00330D	-0.00563154	0.0208448	OXI1
	BnaA10g00510D	0.00607972	-0.0207123	TBL25
	BnaC07g25920D	0.00493293	0.0209894	MED15C
	BnaA03g49250D	-0.0049811	-0.0209603	SUR1
	BnaA01g18990D	0.00390406	0.0211634	CYP71A20
	BnaC09g30320D	0.00534035	0.0208193	A3G2XYLT
	BnaCnng47370D	-0.00590221	0.0206604	slc47a1
	BnaA03g54880D	0.00572394	0.02069	-
	BnaC03g22090D	-0.00611298	0.0205599	CSE
	BnaA09g06210D	0.00524596	-0.0207471	-
	BnaA03g40940D	0.00419506	0.0209792	CML41
	BnaA02g29990D	0.00377124	0.0210506	NSP5
	BnaC08g24360D	0.00621909	-0.0204581	PAL2
	BnaC08g40310D	0.00469912	0.0208418	-
	BnaC08g39670D	-0.00569388	0.0205749	APK2A
	BnaA07g27120D	0.00409047	0.0209481	-
	XLOC_001796	-0.00556531	-0.0206032	PFP-BETA1
	XLOC_068758	0.00609336	-0.0204406	-
	BnaA10g01170D	0.00364638	0.0209735	-
	BnaC06g12550D	0.00352583	0.0209786	NAC92
	BnaA09g02640D	0.00382806	0.020917	5MAT
	BnaC01g01500D	0.00366845	0.0209324	CYP81F1
	BnaA09g28450D	0.0039816	0.0208683	MYB305
	BnaC07g37780D	0.00479098	0.0206864	UTR2
	BnaC06g35270D	-0.00655534	0.0201768	At1g74360
	BnaC03g14230D	0.0039096	0.0208454	-
	BnaA05g24100D	-0.0051242	-0.0205559	TSJT1
	BnaA09g30020D	0.00577234	0.0203587	dlcB
	BnaA07g02670D	0.00342863	0.0208579	YBR287W
	BnaC05g14720D	0.00656522	-0.0200722	ARR7
	BnaA01g00520D	0.00367988	0.0207871	CYP81F1
	XLOC_033606	0.00594133	-0.0202546	-
	BnaC06g30840D	0.0039884	0.0207073	APK2B
	BnaC03g67980D	0.00324135	0.020834	XTH24
	BnaC04g56750D	-0.00599943	0.0201934	HSPRO2
	XLOC_063426	0.00595066	0.020182	-
	BnaC08g39910D	-0.00558001	0.0202616	FUT6
	BnaA03g42010D	0.00386845	0.020619	ARALYDRAFT_915236
	BnaC04g13950D	0.00529372	0.0202832	GSTU5
	BnaA03g38440D	0.0041146	0.0205498	ALD1
	BnaA09g05190D	0.00646985	-0.0199294	SWEET12
	BnaA09g32060D	0.00398104	0.0205522	-
	XLOC_100701	0.00425843	0.0204955	CRK10
	BnaC09g50850D	0.00618017	-0.0199915	TINY
	BnaA09g09160D	0.0044858	0.020433	YBR287W
	BnaA09g32380D	0.00433392	0.0204569	ACX4
	BnaA03g53940D	0.00501821	0.0202953	CYP81D11
	BnaC05g06390D	0.00437673	0.0204402	MYOB1
	BnaC05g31270D	-0.00555582	-0.0201442	PSBT
	BnaA03g58320D	-0.00593706	-0.0200233	CHLI1
	BnaC03g50600D	0.00618436	-0.0199471	DGK2
	BnaA09g18260D	-0.00613249	0.0199564	HAT2
	BnaA03g03400D	0.00437209	0.0203898	ASP3
	BnaA04g04830D	0.0063203	-0.0198409	PAL2
	BnaAnng03060D	0.00507052	-0.0201753	At3g06035
	BnaA09g35200D	0.00463505	0.0202794	SULTR3;1
	BnaC06g24340D	0.00408635	0.0203925	-
	BnaA04g09400D	0.00416384	0.0203715	-
	BnaA01g36230D	0.00373937	0.020445	-
	BnaA09g45550D	0.00622222	-0.019829	ZHD14
	BnaA09g26570D	-0.00485214	-0.0201883	LHCB1.3
	BnaA07g37900D	0.00627563	-0.0197829	CHI
	BnaC06g15240D	0.0063616	-0.0197171	At3g50280
	BnaC08g42160D	0.00363715	0.0203757	ENDO1
	BnaC02g19870D	0.00582615	0.0198191	PMAT2
	BnaA04g13890D	0.0038948	0.0202718	At2g23790
	BnaA02g04960D	-0.00456274	-0.0200974	GER3
	BnaA09g27780D	-0.00660467	0.0195042	ZAT10
	BnaC04g43660D	-0.00581257	0.0197519	At2g33280
	BnaA09g46240D	0.00540029	0.0198598	-
	BnaC03g70990D	0.00508935	0.0199415	NAC021
	BnaC02g38400D	0.00401772	0.0201753	NSP5
	BnaA07g18730D	-0.00562239	-0.0197851	GATA4
	BnaA08g00130D	0.00395547	0.0201575	NAC021
	BnaC06g33270D	-0.00599226	-0.0196298	-
	BnaC08g45790D	-0.00600905	0.0196183	NET1D
	BnaC05g01190D	0.00532778	0.019813	GPAT2
	BnaCnng30450D	0.00388638	0.0201368	BXL4
	XLOC_010013	-0.00540533	0.0197787	CRK10
	BnaA07g27940D	0.00501103	0.0198758	ELF5A-3
	BnaA05g20040D	0.00498693	0.0198718	NEK6
	BnaC09g43920D	0.00385928	0.020101	SWEET15
	XLOC_099916	-0.00506228	-0.0198318	Bp10
	BnaC09g15510D	0.00528526	0.0197664	SOT18
	BnaC02g31920D	0.00484863	0.0198636	ATG7
	BnaA10g20270D	-0.00590968	-0.019574	CALS3
	BnaA05g18430D	-0.0060804	0.0195141	NAC016
	BnaC03g11570D	0.00585217	0.0195789	ZAT12
	BnaA08g26040D	0.00514088	-0.0197674	-
	BnaC02g18120D	0.00510802	-0.0197722	At1g68400
	BnaC01g03160D	-0.00562227	0.0196303	AAP19-1
	BnaC04g31690D	0.00472608	0.0198645	NAC92
	XLOC_085422	0.00629602	-0.0194196	-
	BnaA04g24700D	-0.00407833	-0.0199975	PDF1
	BnaA06g19110D	0.00456811	0.0198819	MPT2
	BnaA03g31090D	-0.00547452	-0.0196393	-
	BnaC03g15070D	-0.00514893	0.0197255	clpX
	BnaC05g42780D	0.00582327	-0.0195296	PAL4
	BnaA08g16930D	0.00473172	0.0198205	At4g38730
	BnaA02g14540D	0.00664677	-0.0192534	-
	BnaC09g17150D	0.00460705	0.0198395	DFRA
	BnaC04g26330D	-0.00535291	-0.0195943	nep1
	BnaC06g31040D	0.00435755	0.0198235	GSTU11
	BnaC04g10910D	0.00572035	0.0194462	-
	BnaA10g19670D	0.0061273	-0.0193196	CHS1
	BnaC02g25780D	0.00612354	-0.0193075	2018-10-02
	BnaA10g16540D	0.00534118	0.0195362	SIP1-2
	BnaA09g14480D	0.00474857	0.0196758	TRX7
	BnaCnng49630D	0.00407104	0.0198156	CYP71B2
	BnaCnng38050D	-0.00520019	-0.0195452	XTH16
	BnaC03g10190D	-0.00500852	-0.0195909	GER3
	BnaA10g07250D	0.00666106	-0.0190474	OMT1
	BnaAnng15360D	0.00589034	0.0192953	INVB
	BnaC08g19110D	-0.00580282	-0.0193168	HVA22H
	BnaC01g36040D	0.00410646	0.0197416	NAC055
	BnaA02g19970D	0.0043149	0.0196931	fosB
	BnaC05g46390D	0.00418084	0.0197172	SUGTL5
	BnaA05g12340D	-0.00555551	-0.0193714	TBL45
	BnaA07g14730D	0.00449607	0.0196305	NAC92
	BnaAnng01650D	0.00394017	0.0197484	TBL9
	XLOC_069557	0.00424872	0.019683	-
	BnaC09g14710D	0.00394913	0.0197336	GOLS4
	BnaC09g09070D	-0.00503913	-0.0194822	-
	BnaA04g09470D	0.00431507	0.0196454	NAC92
	BnaA01g13060D	0.00493706	0.0194932	At3g02290
	XLOC_065059	0.0061078	-0.01915	bVPE
	BnaC02g23100D	-0.00651459	0.0190145	VQ11
	BnaA03g45680D	0.00455144	0.0195607	UTR2
	BnaA08g23010D	-0.00619668	0.0190597	utp25
	XLOC_098377	0.00516791	-0.0193435	MLP423
	BnaC03g13990D	-0.00662175	0.0188911	At5g55860
	BnaUnng00300D	-0.00618936	0.0190313	-
	BnaA01g34620D	-0.00600657	0.0190617	APK2
	BnaA06g27620D	0.003959	0.0195753	-
	BnaCnng60530D	-0.00552912	-0.0191882	TPS10
	BnaC05g09150D	0.00437577	0.0194745	Mgat3
	BnaC03g26940D	0.00381869	0.0195902	HSFA2
	BnaA09g00220D	0.00429918	0.0194833	UGT72B1
	BnaAnng20530D	0.00508419	0.0192694	At4g26340
	BnaC03g71890D	0.00662267	-0.0187766	UGT79B6
	BnaA10g01280D	-0.00512291	-0.0192088	BXL2
	BnaA07g25590D	-0.0064328	0.0187978	zgc:110091
	BnaA03g46210D	0.00500689	0.0192192	YMR099C
	BnaC02g33350D	0.0042353	0.0193782	TDT
	BnaA07g33490D	0.00559131	0.0190289	At1g77330
	BnaA09g38090D	0.00688887	-0.0185853	-
	BnaA03g18900D	-0.00496701	0.0191835	At2g40140
	BnaA03g10710D	0.00670966	-0.0186178	MKK6
	BnaC09g44020D	-0.00615634	0.0188006	WRKY75
	BnaC07g15910D	0.00584663	-0.0188976	-
	BnaA09g18190D	0.0056137	-0.0189643	BOU
	BnaC01g17520D	0.00683248	-0.0185502	TT12
	BnaCnng27960D	-0.00607553	0.0188043	At2g40140
	BnaC03g32010D	-0.00636084	0.0186971	QKY
	BnaA01g16380D	0.00628854	-0.0187175	-
	BnaA06g34320D	0.00672246	-0.0185638	PDF2.2
	BnaA05g05860D	0.00468758	0.0191641	PCS1
	BnaC01g15760D	0.00530893	0.0189759	UGE2
	BnaC06g30030D	0.0051431	0.0190152	-
	BnaA07g23070D	0.00488374	0.0190776	-
	BnaA01g11760D	0.0045785	0.019147	TT12
	BnaC04g31630D	0.00404196	0.0192672	-
	BnaA06g13270D	0.00423104	0.0192068	-
	BnaA05g13680D	-0.00627249	0.018636	-
	BnaA09g41840D	0.00460167	0.0191158	At2g23790
	BnaA02g21030D	0.0046474	0.0190952	SPAC644.07
	BnaA02g26210D	-0.00536833	-0.018886	PDF2.3
	BnaA09g19550D	0.004955	0.0189959	AOC2
	BnaC02g17620D	-0.00512438	-0.0189443	FXG1
	BnaA06g24680D	0.0063967	-0.0185411	XTH6
	BnaA01g26140D	-0.00573912	-0.0187531	RD21A
	BnaA06g10060D	0.00437035	0.0191142	-
	BnaA03g14850D	0.00555215	0.0187971	LAMA2
	BnaC04g50320D	0.00457206	0.0190552	CYP76C4
	BnaC03g10230D	0.00478179	0.0189926	TBL16
	BnaA04g23990D	0.0049379	-0.0189513	-
	BnaAnng11150D	-0.00676097	0.0183695	-
	BnaC03g31510D	-0.00525529	0.018851	At4g01450
	BnaC04g39510D	0.00575762	0.0186961	IRX7
	BnaC05g00790D	-0.00591644	-0.0186347	IQD14
	BnaA07g38610D	-0.00506604	-0.0188652	At1g67750
	BnaC05g32510D	0.00628718	-0.0184919	ASPG2
	BnaA03g56080D	-0.00464697	-0.0189659	GER3
	BnaA03g57570D	0.00508873	0.0188503	SAHH2
	BnaA03g21100D	-0.00580564	-0.018637	-
	BnaC03g24090D	0.00661548	-0.0183553	CML5
	XLOC_029304	-0.00584646	0.0185982	-
	BnaA01g35850D	0.00669409	-0.0182995	HEMA1
	BnaA07g28000D	0.0046989	0.0189085	NAC029
	BnaA10g14270D	0.00596023	-0.0185395	SSL3
	BnaC09g13470D	0.00477197	0.0188733	-
	BnaC01g22640D	0.00384029	0.0190692	KMS1
	BnaA02g21750D	-0.00612461	0.0184588	At4g11320
	BnaC08g40680D	0.00514512	0.0187532	CYP71B2
	BnaC03g44150D	-0.0057886	-0.0185619	FLA7
	BnaA04g28630D	-0.00673619	0.0182252	GSTU7
	BnaC03g36340D	-0.004812	0.0188245	At3g08860
	BnaC06g41500D	0.00643788	-0.0183322	IRKI
	BnaC06g40020D	-0.00563761	0.0185698	WAKL9
	BnaA02g16830D	-0.00572557	0.0185388	RBG5
	BnaCnng62240D	0.00382643	0.0189918	CYP71A13
	BnaC01g40260D	0.0043148	0.0188745	NAC100
	BnaA05g02300D	-0.00643767	0.0182574	EOGT
	BnaC02g41190D	0.00572487	-0.0184807	-
	BnaC01g13540D	0.00671225	-0.018135	At4g22110
	BnaA08g00900D	0.00496028	0.018676	BTG-26
	BnaA01g33290D	-0.00623556	-0.0182732	MYB39
	BnaA06g31120D	-0.00584796	0.0183867	CML30
	BnaC05g36400D	0.00582013	-0.0183908	HCF107
	BnaA06g13230D	0.00631852	-0.0182111	DDB_G0292028
	BnaC03g74080D	0.0053308	0.0185214	MYB75
	BnaA07g09970D	0.00594482	0.0183286	pcp
	BnaAnng30710D	-0.00528709	-0.0185206	NPF1.2
	BnaA02g29010D	-0.00623775	-0.0182159	CAB36
	BnaC06g42400D	-0.00627394	0.0181918	BEL1
	BnaA09g01490D	0.00530554	0.0184955	TIC20-IV
	BnaCnng73810D	0.00679658	-0.0180005	bVPE
	BnaC05g19300D	0.00656176	-0.018082	GATL8
	BnaA01g24320D	0.00526806	0.0184981	CML11
	BnaA05g07370D	0.00619088	-0.0182054	PAL1
	BnaC02g32510D	0.00611269	-0.0182148	ALMT13
	BnaA08g23120D	-0.00656472	0.0180388	LOX3
	BnaA07g16180D	-0.0062915	0.0181335	NPF5.7
	BnaC09g29340D	0.00444156	0.018668	SPMS
	BnaA01g15010D	-0.00586061	-0.018268	ARALYDRAFT_657503
	BnaC04g49370D	-0.00643027	0.0180733	HOL3
	BnaC04g52770D	-0.00438941	-0.0186714	BZIP34
	BnaC07g28960D	-0.00636513	0.0180835	RLK5
	BnaA08g16100D	-0.00593354	0.0182264	CYP79B1
	BnaCnng24710D	0.00508537	0.0184654	UGT73C5
	BnaA06g34360D	0.00524931	0.018418	KAN2
	BnaC04g33890D	0.00477831	0.0185299	At5g40670
	BnaC02g43280D	0.00656483	-0.0179737	CESA6
	BnaC04g00170D	0.00577246	-0.0182201	-
	BnaA08g03660D	-0.00537984	-0.01833	At4g17486
	BnaC09g30700D	-0.00572177	-0.0182188	CAB13
	BnaC01g40250D	0.00462226	0.0185157	ONAC010
	BnaAnng31420D	0.00506117	0.0183928	CYP89A9
	BnaC09g51080D	-0.00606043	0.0180876	-
	BnaA09g07300D	-0.00662539	0.0178684	arl8a
	BnaC07g10580D	-0.00564978	-0.0181946	AGP30
	BnaC07g36310D	-0.00651165	0.017856	PCAP1
	BnaA03g55570D	0.00658647	-0.0178203	SOT15
	BnaA06g27020D	0.00648554	-0.017857	-
	BnaC01g41070D	0.00488842	0.0183518	BOI
	BnaA10g16690D	0.00451184	0.0184387	-
	BnaC05g44270D	0.00649422	-0.0178354	Os01g0939600
	BnaA10g22250D	0.00573194	0.0180895	ABCF2
	BnaC09g36580D	0.00622966	-0.0179175	SSL3
	BnaA05g31530D	-0.00490069	-0.018311	At3g05727
	BnaA10g16950D	0.00532233	-0.0181886	CCX2
	BnaC04g39000D	0.00674432	-0.0176895	YLS9
	BnaA03g37810D	-0.00616442	-0.017894	FLA7
	BnaC01g38510D	0.00500629	0.0182481	MED37C
	BnaC01g36550D	0.00449685	0.0183792	TBL41
	BnaC07g33070D	0.00459085	0.0183504	UGT75D1
	BnaC01g21730D	0.00426504	0.0184242	zmpB
	BnaUnng00040D	-0.00567094	0.0180389	CAR1
	BnaC06g30680D	0.00506579	0.0181934	NAC029
	BnaA02g20660D	-0.00675074	0.0176375	-
	BnaCnng15500D	-0.00620379	0.017829	ADAT2
	BnaC02g21010D	-0.00581397	0.0179528	-
	BnaA03g18340D	0.00534869	0.0180934	-
	BnaA04g18980D	-0.0058079	-0.0179476	-
	BnaC03g68980D	0.00582793	0.0179128	CHUP1
	BnaA07g10170D	0.00577099	0.0179131	-
	BnaA08g31370D	0.0057312	-0.0179224	-
	BnaA07g28320D	0.00587724	0.0178727	APK2B
	BnaC07g49430D	0.00682588	-0.0175322	At5g28300
	BnaC03g73200D	-0.00614927	0.0177611	LEA5
	BnaA07g28050D	0.00530378	0.0180285	METTL7A
	BnaC01g01790D	0.00427724	0.0182725	HSFB1
	BnaC09g14610D	-0.00556103	-0.0179228	At1g48100
	BnaA07g11130D	0.00497635	0.0180923	-
	BnaC07g50590D	0.0053409	0.0179878	ERF054
	BnaA10g00360D	-0.00552925	-0.0179284	PIP1-3
	BnaCnng11120D	0.00494519	0.0180932	DJ1E
	BnaC07g48400D	0.00455852	0.0181667	UGT85A1
	BnaA07g35920D	0.00492133	0.0180652	BAC2
	BnaA10g01230D	0.00621298	0.0176564	SUD1
	BnaC03g05040D	0.00633172	0.0175988	DDB_G0284757
	BnaA08g02260D	-0.00651187	0.0175317	YAO
	BnaC03g11910D	-0.00507055	0.0179904	At5g59530
	BnaA07g10520D	0.00463999	0.0181055	UGT85A1
	BnaC01g09700D	-0.00544435	-0.0178605	At4g28780
	BnaC09g44680D	0.00476092	0.018052	LOG8
	BnaA07g25040D	0.00407263	0.0181968	At1g67360
	BnaA02g24690D	0.00699549	-0.017282	BOU
	XLOC_073729	-0.00651178	0.0174452	APS2
	BnaA03g15160D	-0.00581008	-0.0176829	-
	BnaA06g22930D	0.00636169	-0.0174897	BGAL10
	BnaCnng72290D	-0.00705232	0.0172133	rnhA
	BnaCnng03910D	0.00450205	0.0180475	A4GALT
	BnaC05g14820D	0.00467626	0.0179982	CXE1
	BnaA04g16260D	0.00582237	0.0176593	IRX7
	BnaC06g00050D	0.00483287	0.0179142	IP5P11
	BnaC07g12260D	-0.00669771	0.0173036	-
	BnaA02g25550D	0.0047441	0.0179371	TDT
	BnaA03g29230D	-0.00565872	-0.0176609	PAE12
	BnaA07g18720D	0.00579887	0.0176061	-
	BnaC03g14650D	-0.00656763	0.0173325	NUP88
	BnaA10g20120D	0.00495217	0.0178575	SWEET15
	BnaA01g13460D	-0.00463849	-0.0179296	GSVIVT00026920001
	BnaA02g16600D	-0.00633919	0.0173869	DENND6A
	BnaA01g34610D	-0.00557265	0.0176471	CYP79B1
	BnaCnng18330D	0.00584696	0.017557	At3g03100
	BnaA09g04260D	-0.00610657	0.0174622	STP13
	BnaA03g11350D	-0.00618361	-0.017423	TIM22-3
	BnaC02g05070D	0.00699164	-0.0171138	CHS
	BnaC07g03180D	-0.00641254	-0.0173259	At2g18620
	BnaA01g08120D	-0.00573382	-0.0175622	At4g28780
	BnaA09g55990D	-0.00642864	0.017319	Dnajb13
	BnaA09g52700D	0.00600867	-0.0174529	FOR1
	BnaA08g11390D	0.00415779	0.0179835	UGT73B3
	BnaC01g39260D	-0.00641544	-0.0172919	immp2l
	XLOC_095851	-0.00599646	0.0174414	At5g52880
	BnaA08g05530D	0.0059678	0.0174479	KMS1
	BnaCnng36000D	-0.00689664	0.0171016	AHL15
	BnaA09g55740D	-0.0064863	-0.0172613	RRF
	BnaC08g37760D	-0.0056202	0.0175589	LOX3
	BnaA07g15830D	-0.00550611	-0.0175939	-
	XLOC_017894	0.00492356	0.0177508	At2g13820
	BnaA07g03730D	-0.00625279	0.0173234	At5g37990
	BnaC09g09610D	-0.00569635	-0.0175045	ATJ11
	XLOC_073643	-0.00498831	0.0177171	At3g21810
	BnaA04g04390D	0.00704542	-0.0169961	At5g41260
	BnaA03g20930D	-0.00603433	0.0173783	At2g44790
	BnaA07g31260D	-0.00669188	0.0171309	SOT16
	BnaAnng14500D	0.00658241	-0.0171658	-
	BnaA03g19610D	-0.00638237	-0.0172392	-
	BnaA05g24070D	0.00509226	-0.0176621	-
	BnaA06g06880D	0.00639568	0.0172327	-
	BnaA09g37050D	-0.00686334	0.0170447	ZED1
	BnaC04g28250D	0.00652478	-0.0171595	FLA15
	BnaC06g35000D	-0.00612358	0.0173026	SOT16
	BnaA06g03870D	0.00524899	0.0175863	DHNAT1
	BnaC04g56940D	0.00663443	-0.0171072	-
	BnaC03g11850D	0.0057122	0.0174121	At5g59540
	BnaA01g02910D	-0.00568594	-0.0174189	At4g34220
	BnaA03g43680D	-0.00574995	-0.0173831	Alg14
	BnaA02g26200D	-0.00557008	-0.0174303	IDD4
	BnaC06g30250D	0.00493234	0.0176172	At4g39670
	BnaCnng73250D	-0.00552821	-0.0174375	nep1
	BnaC07g19090D	0.00537276	0.0174659	WRKY8
	BnaA03g13740D	0.00603336	0.0172325	UGT87A2
	BnaC01g16510D	0.00646236	-0.0170758	ZHD1
	BnaA03g12520D	-0.0063223	0.0171248	-
	BnaC01g33640D	0.00534531	0.0174419	FLP2
	BnaC09g45940D	0.00534531	0.0174419	FLP2
	BnaC01g05030D	0.00514289	0.0174961	LKR/SDH
	BnaC04g53550D	0.006297	0.0171087	AKR4C8
	BnaA02g22370D	-0.00598203	-0.0172175	At5g15350
	BnaAnng08310D	-0.00559961	-0.017335	MCA1
	BnaC07g39860D	0.00534643	0.0174147	BETA-OHASE
	BnaC03g71580D	-0.00635486	0.0170709	BAM4
	BnaC03g36760D	-0.0059304	-0.0172209	ASD1
	BnaC09g47860D	-0.00645131	-0.0170315	GDH2
	XLOC_031928	0.00556702	0.017329	MT1C
	BnaA03g06170D	-0.00624247	0.0170845	ITPK1
	BnaC03g36350D	-0.00476414	0.0175484	At3g08860
	BnaC01g02560D	0.00650007	0.0169745	alkbh5
	BnaA09g34290D	-0.00657664	0.0169416	CHI4
	BnaC04g16900D	-0.00625686	-0.0170512	-
	BnaC07g45890D	0.00686043	-0.0168174	-
	BnaCnng01600D	-0.00579758	-0.0172088	YLS9
	BnaC04g00330D	0.0049785	0.0174623	GOLS1
	XLOC_076782	0.00475845	0.0175131	-
	BnaC09g27750D	0.0070249	-0.016723	At5g51380
	BnaC03g28730D	-0.00605002	-0.0170957	-
	BnaA01g16250D	-0.00599137	0.0171093	Crnkl1
	BnaA03g41970D	0.00487692	0.0174558	UGT75D1
	BnaC05g42490D	0.00542335	0.0172718	utp7
	BnaAnng11680D	0.00502006	0.0173914	HIPP26
	BnaA03g04470D	-0.00643528	0.0169184	ZIF1
	BnaA09g00800D	-0.00564166	-0.0171992	EID1
	BnaC05g46490D	-0.0058625	0.0171106	FPP3
	BnaAnng32910D	-0.0057075	0.01716	erd-2
	BnaA10g27330D	-0.0061937	-0.0169901	-
	XLOC_002721	0.00506605	0.017356	-
	BnaA01g28520D	0.00641723	-0.0168911	-
	BnaC05g03410D	-0.00548318	0.0172161	LanA
	BnaAnng07100D	0.00616395	0.0169811	PVA21
	BnaAnng20850D	0.0064978	0.0168502	-
	BnaC09g06200D	0.0046407	0.0174501	SAL1
	XLOC_097071	0.00448783	0.0174774	-
	BnaC06g21760D	0.00599029	0.0170101	-
	BnaA09g01230D	0.00473057	0.0174012	ERECTA
	BnaC04g50970D	0.00506012	0.0173044	ATHB-7
	BnaC07g27080D	-0.0062916	-0.0168883	-
	XLOC_080625	0.00529435	0.0172259	-
	BnaC02g35150D	-0.00529846	0.01722	SOT12
	BnaA03g21890D	-0.0061031	-0.0169504	-
	BnaC07g38730D	0.00568378	0.0170828	YSL1
	BnaCnng76140D	-0.00550506	-0.0171348	-
	BnaA10g16510D	-0.00593981	-0.0169741	cnot11
	BnaA10g02180D	-0.0057372	-0.0170321	-
	BnaA10g04490D	0.00571225	0.0170343	-
	BnaA09g20430D	0.0050104	0.0172527	CRK36
	BnaA06g01740D	-0.00632726	0.016808	GCR2
	BnaA04g05520D	-0.0063671	-0.0167853	-
	BnaC06g18570D	-0.00611419	-0.0168735	ATL5
	BnaA06g36020D	0.0051878	0.0171785	WRKY8
	BnaA01g22500D	0.00544668	0.0170831	-
	BnaA02g30370D	-0.00560982	-0.0170299	RNF4
	BnaA03g50500D	0.00698152	-0.0165108	QWRF8
	BnaC04g00900D	0.00563055	0.016993	RTNLB5
	BnaCnng71630D	0.00550373	0.0170319	At3g12390
	BnaCnng29600D	-0.00560493	-0.0169981	At1g26090
	BnaC04g28590D	0.00470485	0.0172685	DJ1A
	BnaA03g23840D	-0.0060991	-0.0168256	TL29
	BnaC06g00260D	0.00525542	0.0171071	RD21A
	BnaAnng04870D	-0.00712845	0.0164054	CG5412
	BnaA05g13010D	0.00525517	0.0170976	CAR1
	BnaA03g12660D	0.00595006	0.016854	LTI65
	BnaC02g02670D	-0.00543328	-0.0170261	KCS21
	BnaA02g28080D	-0.00625466	0.0167399	PIRL2
	BnaC01g17090D	0.00568398	0.0169405	-
	BnaA08g24230D	-0.00657878	0.0166091	PDCB3
	BnaAnng31560D	0.00495927	0.017144	NFYA5
	BnaC04g14260D	0.00702208	-0.016397	RPT2
	BnaCnng57410D	0.00584569	0.0168463	At2g40900
	BnaC08g41460D	-0.00630825	0.0166735	XLG2
	BnaA10g05120D	0.00495508	0.0171	IP5P11
	BnaA02g15980D	0.00654809	-0.0165539	-
	BnaC01g44130D	-0.0054131	0.016944	UBC32
	BnaA03g06270D	-0.00659985	0.0165128	AP5M
	BnaC03g26060D	0.00713933	-0.0162867	MYB12
	BnaCnng35440D	0.00494335	0.017077	GSTU10
	BnaC09g31330D	0.00485606	0.0171019	spg1
	BnaAnng23580D	-0.00618394	-0.0166609	TUBB3
	BnaCnng18340D	0.00573199	0.0168175	XPO1B
	BnaA06g32570D	-0.00699151	0.0163313	At2g33490
	BnaAnng37880D	-0.00648947	0.0165051	POX2
	BnaA08g07290D	0.00423018	0.017223	XGD1
	BnaA03g41940D	0.00663012	-0.0164464	UGT84A1
	BnaA08g29070D	-0.00690013	0.0163314	PLL5
	BnaC05g45070D	-0.0069079	0.0163268	-
	BnaA04g25720D	0.00688722	-0.016335	BGLU15
	BnaA10g09400D	0.00620153	0.0165931	rpmD
	BnaCnng69620D	-0.00628229	0.0165595	UMPS1
	BnaC03g49940D	0.00446673	0.017137	yrpB
	BnaCnng15180D	-0.00585308	0.0167095	CML47
	BnaA06g12300D	0.00544929	0.016838	GSPT1
	BnaA01g02080D	0.00711895	-0.0161992	-
	XLOC_046561	0.00659647	0.0164007	At4g04430
	BnaA10g00630D	0.00545743	0.0168133	-
	BnaA06g26250D	-0.00698337	0.0162265	rplX
	BnaCnng18240D	-0.00621004	0.0165357	-
	BnaC05g14530D	0.00589296	0.0166457	-
	XLOC_025799	0.0057494	-0.016686	GATA
	BnaC06g19690D	0.00573744	0.0166875	WAKL10
	BnaC06g30320D	0.00646171	-0.0164181	PHL1
	BnaC07g29920D	0.00679704	-0.0162821	-
	BnaA10g16000D	0.00578327	-0.016669	-
	BnaCnng06490D	0.00579688	0.0166614	SUGTL2
	BnaC05g19560D	-0.00478201	0.0169782	-
	BnaC07g29030D	-0.00718513	0.0161084	At5g03795
	BnaC05g14270D	-0.00541913	0.0167768	SOT17
	BnaC03g32780D	0.00543423	0.0167672	AFP4
	BnaC09g44740D	-0.0060567	-0.01655	LYSA2
	BnaA08g24190D	0.00576798	-0.0166424	DBP
	BnaA07g33590D	0.00524328	0.0168141	PDIL1-2
	BnaA03g28150D	-0.00456407	0.0170038	PUB21
	BnaC08g19690D	-0.00588774	0.0165733	OMT1
	BnaA10g16930D	-0.00630542	-0.0164061	PSRP6
	BnaC04g45830D	0.0056404	0.0166441	At2g38640
	BnaC03g61120D	0.00538859	0.0167141	CAD8
	BnaCnng28670D	0.00601746	0.0164868	HT1
	BnaC02g23550D	0.00667825	-0.0162259	LQY1
	BnaA07g15340D	-0.00678376	0.0161732	UBC5
	BnaA08g08310D	-0.00648872	0.016278	ERF1A
	BnaA02g32440D	-0.00468029	-0.0168739	-
	BnaA05g33110D	-0.00510437	-0.0167451	LTL1
	BnaA10g17440D	0.00563087	0.016569	GSTF12
	BnaCnng19550D	-0.00611711	0.0163944	SMO1-1
	BnaA06g19130D	-0.00594936	-0.0164511	FLA2
	BnaC06g00560D	0.00479027	-0.0168214	SGRL
	XLOC_022517	-0.00599078	-0.0164315	At4g33100
	XLOC_015671	0.00495191	0.016768	CRK10
	BnaA01g17710D	0.00641151	-0.0162653	-
	BnaA08g06520D	-0.00646418	0.0162398	TAR4
	BnaC09g23670D	0.00548972	-0.0165925	AGL14
	XLOC_059394	0.00567815	0.0165243	GLIP1
	BnaC08g05690D	-0.00654837	0.016191	CYP83B1
	BnaCnng18490D	0.00530364	0.01664	DEGP7
	BnaA03g12860D	-0.00627973	0.0162914	slc47a1
	BnaA06g36380D	-0.00630404	-0.0162635	APS1
	BnaC05g12590D	0.00721043	-0.0158767	-
	BnaC02g22590D	0.00543157	0.0165696	SSL12
	BnaC02g28290D	-0.00543185	0.0165549	CYP93A1
	XLOC_062723	-0.00681821	0.0160247	-
	BnaC06g11350D	-0.00608491	0.016315	OPT7
	BnaA05g30920D	0.00551655	0.0165071	ATG8H
	BnaA05g10050D	0.00684016	-0.0160019	SCPL46
	BnaCnng55990D	-0.00644829	0.0161612	HTH
	BnaC03g21560D	0.0051323	0.0166231	AMMECR1L
	BnaA04g28410D	-0.00547398	-0.0165007	-
	BnaC03g05820D	0.00555318	0.0164627	ERF113
	BnaA09g29530D	0.00675189	-0.0160056	B3GALT17
	BnaC08g35290D	-0.00596085	-0.0163105	-
	BnaA03g25280D	0.00625305	-0.0161919	WVD2
	BnaC06g32380D	-0.00682152	0.0159607	At1g71250
	BnaCnng62350D	-0.00559157	-0.0164293	-
	BnaC02g31500D	-0.00522817	-0.0165467	PAE11
	BnaC09g20710D	0.00521908	0.0165394	GSTZ1
	BnaC06g07780D	-0.00512869	-0.0165656	GXM3
	BnaCnng78220D	-0.00665244	0.0160071	Prpf31
	BnaC07g35800D	0.00575943	0.0163471	CYP707A1
	BnaC05g48970D	-0.00596244	-0.0162711	At1g04680
	BnaCnng13310D	0.0065609	-0.0160331	XTH6
	BnaA01g32570D	-0.00587857	-0.0162929	-
	BnaC05g05680D	0.00670048	-0.0159547	GATA11
	BnaC09g17380D	-0.00616782	0.0161614	At5g43190
	BnaA02g14430D	0.00557036	0.0163672	ZHD11
	BnaC03g49300D	-0.00615452	-0.0161521	ASN2
	BnaC09g11480D	-0.00643617	0.0160299	At1g76660
	BnaC04g48220D	0.00703297	-0.0157768	-
	BnaCnng07130D	0.00555084	0.0163557	UGT71B2
	BnaC01g38060D	0.00515928	0.0164818	PHL1
	BnaA03g00850D	-0.0058804	0.0162366	CDC48E
	BnaC01g04120D	-0.00651124	-0.0159924	FUC95A
	XLOC_045467	0.0060022	0.01619	FIPS5
	BnaC05g04530D	0.00509336	0.0164981	HPD
	BnaC08g24280D	0.005134	0.0164831	fluG
	BnaC03g68550D	-0.00591078	0.0162204	XBOS34
	BnaA01g18930D	0.00609238	0.0161517	SUV3
	BnaA02g15190D	-0.00567013	-0.0163044	MLP28
	BnaC02g40850D	0.00489963	0.0165513	ZFP3
	BnaC04g39770D	0.00622126	-0.0160985	LBD11
	BnaAnng08630D	-0.00548771	-0.0163537	ATX1
	BnaC06g35410D	-0.00649536	-0.015969	CHLP
	BnaA03g45460D	-0.00540177	0.0163651	SAUR36
	BnaUnng00090D	-0.00563633	0.0162827	FKBP43
	BnaA06g09010D	0.00439075	0.0166611	rnf181
	BnaA04g00120D	-0.00514265	-0.0164306	RANGAP1
	BnaA06g30390D	0.00500151	0.0164482	NSP5
	BnaA09g13280D	-0.00623435	0.0160198	TAO1
	BnaA09g40180D	-0.00672059	0.0158109	SmD2
	BnaC05g48490D	0.00605025	0.0160756	AFP4
	BnaC03g57550D	-0.00657492	0.0158643	-
	BnaC05g43850D	-0.00576352	0.0161745	ATPK2
	BnaA05g11860D	-0.00392325	-0.0167158	At2g30620
	BnaA03g26510D	-0.00618659	0.0160153	tolB
	BnaA05g33670D	-0.00595632	0.0161012	At3g01760
	BnaC08g28470D	0.00599041	0.0160883	SAP13
	BnaC02g18180D	0.0050562	0.0164036	-
	BnaC03g61080D	0.00530955	0.0163211	-
	BnaC05g24530D	0.00494352	0.0164343	PRS2
	BnaA07g29140D	0.00714774	-0.0155908	-
	BnaA08g22570D	-0.00674947	-0.0157658	GAUT11
	BnaA10g06770D	-0.00640457	-0.0159034	At5g53490
	BnaA04g02660D	-0.00614448	-0.0159986	PPD6
	BnaC02g34860D	-0.00617205	0.0159869	PHO1-H5
	BnaCnng42410D	0.00594537	0.0160726	NUDT25
	BnaC03g01090D	-0.00607902	-0.016016	FLA11
	BnaC07g31880D	-0.00566703	-0.0161613	-
	BnaC01g03450D	0.00520184	0.0163156	HIPP26
	BnaC09g31100D	-0.00662466	0.015789	RST1
	BnaCnng48980D	0.00560641	-0.0161703	At2g38370
	BnaA04g16780D	-0.00596045	-0.0160381	EXPA6
	BnaAnng28300D	0.00609498	0.0159859	LHT1
	BnaC08g32980D	-0.0058055	-0.0160888	ERECTA
	BnaA09g27390D	-0.0063039	-0.0158988	AGP31
	BnaC06g22070D	0.0063205	0.0158866	EXL1
	BnaC01g15010D	0.00594766	0.0160271	At3g02290
	BnaC04g08050D	-0.0066386	-0.0157527	CP29B
	XLOC_101997	0.00677015	-0.0156961	-
	BnaA09g38130D	0.00434774	0.0165306	At3g60040
	BnaC09g22920D	-0.00713627	0.0155304	MJ1156
	BnaC01g31340D	0.00527808	0.0162475	ACA12
	BnaAnng22230D	-0.00692329	0.015615	ACO3
	BnaA01g20960D	-0.00656569	0.0157616	PP2A10
	BnaA03g38220D	-0.00645747	-0.015783	-
	BnaC05g43540D	0.0058607	0.0160082	FES1
	BnaC02g11530D	0.00681854	-0.015621	VIN3
	BnaA06g24250D	-0.00675964	-0.0156391	TT12
	BnaC02g42010D	-0.00610564	-0.0159036	PDCB1
	BnaC02g20340D	-0.00631143	-0.0158199	MLP28
	BnaA06g00210D	-0.00640412	-0.0157814	PSAG
	BnaA03g41960D	0.00646344	0.0157555	PPDK
	BnaA06g15030D	0.00548131	0.0161214	WAK5
	BnaA05g24900D	0.00465781	0.0163633	CYP72A15
	BnaA02g30210D	-0.00526274	-0.0161786	-
	BnaC04g02520D	0.0071021	-0.0154569	SPL9
	BnaA06g15600D	-0.00706029	0.0154694	At3g49725
	BnaA09g24250D	-0.00676521	-0.0156006	petF2
	BnaAnng28390D	-0.00467919	0.0163461	-
	BnaC04g35780D	-0.00585251	0.0159636	GLPK
	BnaC01g40390D	0.00522996	0.016176	GSH3
	BnaA04g26280D	0.00527183	0.0161586	CYP76C4
	BnaC08g31150D	-0.00706643	0.0154486	CRG1
	BnaA06g02540D	-0.00622524	-0.015799	-
	BnaA08g24470D	-0.00618934	-0.0158115	-
	BnaA01g30490D	0.00396753	0.0165074	MED37C
	BnaA03g26660D	-0.00518514	0.0161563	At4g01450
	BnaC04g39350D	0.00498759	0.0162127	HDT4
	BnaC01g38370D	0.00571878	0.0159671	DRAP1
	BnaA08g12080D	0.00648199	0.0156665	At3g26560
	BnaC05g49090D	-0.00680699	0.0155265	At4g18975
	BnaA08g22970D	-0.00657752	0.0156149	PGDH2
	BnaC05g37160D	-0.00494284	-0.0161994	TIP2-1
	BnaA10g26350D	-0.00617734	-0.0157684	CSLA9
	BnaA07g06160D	0.00566297	0.0159406	At4g13800
	XLOC_035655	0.00620336	0.0157361	-
	BnaA07g23090D	0.00558164	0.0159615	ERF073
	BnaA06g21520D	0.00673497	-0.0155092	IQD14
	BnaC03g11590D	0.00576409	0.0158945	MYB59
	BnaC03g53230D	0.00600371	0.0158023	MYOB1
	BnaC08g36650D	0.00640075	-0.0156444	TET2
	BnaA03g60400D	-0.00669891	0.0155174	-
	BnaC05g39860D	-0.00664	-0.0155398	-
	BnaC03g19670D	0.00678331	-0.0154712	FLA16
	BnaCnng22150D	-0.00633579	-0.0156587	-
	BnaA05g06830D	0.00506782	0.0161107	At2g37700
	BnaCnng73940D	0.00471183	0.0162171	RPA1B
	BnaC03g05260D	-0.00553945	-0.0159496	-
	BnaC04g28120D	-0.0054665	-0.0159664	nep2
	BnaA09g02000D	0.00563286	0.0159061	SDH2-2
	BnaC01g40380D	0.00627596	0.0156633	At5g18180
	BnaCnng76330D	0.00641987	-0.0156028	C/VIF1
	BnaAnng40300D	-0.00690461	0.0153937	ECM16
	BnaA01g20750D	0.00690561	-0.015391	PME34
	BnaA09g33760D	-0.00619679	-0.0156886	CP29A
	BnaC05g10460D	0.00503244	0.0160985	rnf181
	BnaC05g21220D	0.00546805	0.0159519	-
	BnaC03g51740D	0.0069485	-0.0153575	-
	BnaA07g08930D	0.00509633	0.0160643	-
	BnaA05g28630D	0.00668875	0.0154666	RABC2B
	BnaC01g38080D	-0.0049742	0.016097	A4galt
	BnaC05g18440D	-0.00639988	0.0155764	-
	BnaC02g17410D	0.00588188	-0.0157744	THI2
	BnaUnng00890D	0.00588188	-0.0157744	THI2
	BnaA02g08850D	0.00491012	0.016098	RIN4
	BnaC03g60820D	-0.00708333	0.0152667	CYP79B1
	BnaA09g02250D	-0.00581933	0.0157712	GATL10
	BnaA09g49440D	0.00551421	0.0158709	AIP1
	BnaA02g06600D	0.0045056	0.0161761	COL1
	BnaCnng67820D	0.004737	0.0161045	SULTR3;1
	BnaC05g43550D	0.00564576	0.0158086	PAT16
	BnaUnng00920D	-0.00656578	-0.0154465	MYB306
	BnaC08g29340D	0.00681938	-0.0153357	At3g57590
	BnaCnng53280D	0.00577267	0.015754	UGT91C1
	BnaA06g21790D	0.00716429	-0.0151686	-
	BnaA01g18400D	0.00483756	0.0160595	UGT75D1
	BnaC09g54320D	0.00557348	0.0158162	SIP1-2
	BnaC03g05640D	0.00660363	0.0154069	NFYA1
	BnaC07g49220D	0.00529204	0.0159031	-
	BnaA01g29880D	0.00549042	-0.015835	ATJ11
	BnaA06g38550D	-0.00648543	-0.0154487	DRT112
	BnaA10g23320D	-0.00575875	-0.0157319	PDCB2
	BnaC08g14330D	-0.00602142	-0.0156276	Poll
	BnaA04g27470D	0.00650551	0.0154321	NGA2
	BnaA04g16190D	-0.00614925	-0.0155739	-
	BnaC04g30740D	-0.00621116	0.0155484	-
	BnaC05g16660D	0.00716899	-0.0151292	SWEET1
	BnaA03g44340D	0.00567563	0.015747	RGXT3
	BnaA08g31680D	-0.00657487	-0.0153884	-
	BnaA03g09270D	0.00563594	0.01575	MYB59
	BnaC03g42290D	0.00500349	0.0159595	-
	BnaCnng03180D	0.00660558	-0.015363	CER26L
	BnaCnng68030D	-0.00692715	0.0152203	At1g07740
	BnaA03g47100D	-0.00658412	-0.0153716	ACP4
	BnaA07g08940D	-0.00661115	0.0153548	-
	BnaA06g09100D	-0.00608275	-0.0155696	Hdhd3
	BnaA03g37240D	0.00538768	0.015823	CPN60
	BnaA09g51870D	0.00497178	0.0159571	DGD2
	BnaA07g08710D	0.00535905	0.0158261	-
	BnaC02g32710D	-0.00624781	0.0154862	IKU1
	BnaCnng08060D	-0.00622982	-0.0154826	ZHD5
	BnaC06g39610D	0.00532691	0.0158084	PAB1
	BnaAnng11160D	-0.00688087	0.0151886	-
	BnaC09g23060D	-0.00603611	0.0155372	MPC3
	BnaA10g14750D	-0.00495846	-0.0159109	-
	BnaC03g56520D	0.00526483	0.015808	-
	BnaC03g12500D	-0.0070402	0.015086	-
	BnaA02g35970D	-0.00645714	0.0153419	At1g75280
	BnaA07g07010D	0.00682193	0.0151802	-
	BnaC01g38550D	0.00550172	0.0156777	At3g12620
	BnaC06g39250D	-0.00509192	-0.0158076	EP1
	BnaC08g30850D	0.00575608	0.0155778	SAUR36
	BnaA03g03230D	0.00526191	0.0157436	SPS2
	BnaC06g23840D	0.0059275	0.0155052	At1g73020
	BnaC06g04500D	0.00541195	0.015692	-
	BnaA06g10520D	-0.00597838	-0.0154826	CAP10B
	BnaC09g04560D	-0.00625192	0.0153736	WRKY30
	BnaA06g39090D	-0.00688209	0.0151015	blp
	BnaA07g32220D	-0.0064239	-0.0152962	EXL3
	BnaCnng58860D	0.00585246	0.0155224	-
	BnaC02g06570D	-0.00669481	-0.015174	At5g16400
	BnaC08g45390D	-0.0060408	0.0154433	SCL31
	BnaC09g47360D	0.00698354	-0.0150391	FLS1
	XLOC_041426	0.00577898	0.0155333	-
	BnaC03g48520D	-0.00579905	0.0155254	AZF1
	BnaA09g46090D	-0.00543168	0.0156543	At1g13780
	BnaA03g21850D	0.00690933	-0.015056	BGLU3
	BnaA09g40540D	-0.00623415	-0.0153462	ERECTA
	XLOC_090212	-0.00657977	0.0151985	-
	BnaA07g23760D	0.00513714	0.0157364	PXG4
	BnaCnng03810D	-0.00648123	0.0152274	At1g04910
	BnaC03g64160D	0.00646708	0.0152292	MYB39
	BnaC06g11610D	0.0059434	0.0154405	HT1
	BnaC09g32830D	-0.00619322	-0.0153339	-
	BnaC07g50680D	-0.00628024	-0.0152945	EXPB3
	BnaC01g40210D	0.00611698	0.0153601	GAPC2
	BnaC07g46690D	-0.00580568	-0.0154777	NAGS2
	BnaA08g12420D	-0.00691732	0.0150089	WRKY11
	BnaC09g02300D	-0.00637351	-0.0152468	AAT1
	BnaA05g24050D	-0.00728377	0.0148279	NAC055
	XLOC_027041	-0.00600222	0.0153884	-
	XLOC_104965	-0.00453663	0.0158774	At2g39360
	BnaC08g49820D	-0.00693104	0.0149814	At4g28440
	BnaA04g27400D	0.00716331	-0.014866	-
	BnaC02g18230D	-0.00639896	0.0152052	At5g47260
	BnaC07g37670D	0.00678342	0.015032	LDOX
	BnaA09g57180D	-0.0062647	0.0152536	HEMA2
	BnaA03g52270D	-0.00547934	-0.0155438	At4g32950
	BnaA05g34850D	-0.00591957	0.0153727	WRKY33
	BnaC03g32870D	0.0072627	-0.0147801	At1g04910
	BnaA08g24520D	0.00686775	-0.0149628	SCRM2
	BnaAnng10720D	-0.00654581	-0.0151037	WNK1
	BnaC01g43800D	0.00581975	0.0153746	ABF4
	BnaC01g04250D	0.00558249	0.0154602	UGT73B3
	BnaA09g08790D	-0.00568448	-0.0154108	-
	BnaA06g16720D	0.00632179	0.0151569	-
	BnaA07g34300D	-0.00626427	0.0151777	GGH3
	BnaC03g78230D	0.0056208	0.0154242	BTG-26
	BnaA04g04450D	0.00695361	-0.0148669	-
	BnaC04g05720D	0.00597856	0.0152826	PCS1
	XLOC_082202	-0.00603354	-0.0152551	-
	BnaC03g72710D	0.0054319	0.0154745	UGT74F2
	BnaA01g29500D	-0.00677958	-0.0149219	At3g14220
	BnaA09g14300D	-0.00576584	-0.0153397	PSRP2
	BnaA06g02990D	0.00537323	0.0154771	CYP72A15
	BnaA09g42530D	-0.00549471	0.0154336	-
	BnaA02g03840D	-0.00603066	-0.0152312	GLP1
	BnaA07g25210D	0.00642567	-0.0150542	4CL3
	BnaC07g16810D	-0.00486053	-0.0156282	IAA7
	BnaA09g31660D	-0.00511507	0.0155442	Ephx2
	BnaA09g54410D	-0.00556149	-0.0153849	-
	BnaA09g28710D	-0.00662534	-0.0149546	At2g28960
	BnaA06g01520D	-0.00680736	-0.0148666	At1g52740
	BnaA06g15020D	0.00597375	0.0152205	WAK1
	BnaA02g16980D	0.00435744	0.0157534	BOR4
	BnaC09g40500D	0.00463539	-0.0156631	-
	BnaCnng41750D	0.00556795	0.0153527	BS
	BnaC05g14810D	0.00661007	0.0149328	TIFY10A
	BnaA10g02830D	-0.00586239	-0.0152399	At1g04680
	BnaA09g16720D	-0.00658243	-0.014929	IRX15-L
	BnaC02g11110D	0.00453751	0.01567	-
	BnaC05g13990D	-0.00649485	-0.0149647	At1g18250
	BnaC03g45740D	0.00713833	-0.0146628	IRX15-L
	BnaA09g44560D	-0.00685103	0.0147985	rngB
	XLOC_029674	-0.00467637	0.0156105	PUB56
	BnaA03g56220D	0.00565187	0.0152836	At5g59540
	XLOC_010803	-0.00574697	0.0152426	-
	BnaC07g23050D	0.00623145	0.0150361	-
	BnaC01g10730D	-0.0068934	0.0147434	KAT2
	BnaC03g24130D	-0.00644443	0.0149425	GPX3
	BnaC01g14310D	0.00602092	0.0151174	LDOX
	BnaUnng03450D	0.00543979	-0.0153334	AIP2
	BnaC06g00710D	-0.00707506	0.0146462	PUP11
	BnaC07g13000D	-0.00615334	0.0150543	-
	BnaC09g02600D	-0.00663715	-0.0148446	LSM5
	BnaA09g47670D	-0.00630783	0.0149875	MLO2
	BnaC03g77200D	0.00610155	0.0150726	CBSX2
	BnaC04g27940D	0.00609796	0.0150738	-
	BnaA05g06130D	-0.00671684	0.014807	APC7
	BnaC08g29630D	0.00562395	0.0152532	ABCC10
	BnaA03g13620D	0.00607953	-0.015076	DREB1C
	BnaA09g25580D	0.00686961	0.0147298	neur
	BnaC04g43940D	0.00721366	-0.014563	-
	BnaC06g36410D	0.00627225	0.0149914	GASA1
	BnaC03g00250D	0.0050416	0.0154445	TAAC
	BnaC08g01540D	-0.00653099	-0.0148699	CTL1
	BnaAnng24020D	-0.00548902	-0.0152824	At5g06290
	BnaC08g01760D	-0.00607794	0.0150507	RPL22B
	BnaC01g14360D	-0.00626236	0.0149749	CRK11
	BnaC03g17730D	0.00528305	0.0153465	UGT74D1
	BnaC06g01610D	0.0071262	-0.0145787	At1g48100
	BnaC02g22640D	-0.00682129	0.0147182	SOT16
	BnaA07g06010D	0.00536672	0.0153005	GR1
	BnaC09g20590D	-0.00632535	-0.0149212	FRL5
	BnaA01g36460D	-0.0060249	0.015042	OST3B
	BnaC01g15870D	0.00533718	0.0152976	TRE1
	BnaC02g06080D	-0.00690433	-0.0146553	UGD3
	BnaC07g13550D	0.00634055	0.0149076	NAC13
	BnaA01g03020D	0.00558813	0.0152054	UGT73B3
	BnaA03g50310D	-0.00648414	-0.0148451	At4g30570
	BnaA01g29950D	-0.00648496	-0.0148283	rsmB
	BnaA03g03220D	0.00613694	0.0149701	-
	BnaA07g04150D	0.00701757	-0.0145761	NIR1
	BnaC07g49170D	-0.00569381	0.0151405	PAT1
	XLOC_018644	-0.00604234	-0.0150046	ACL1.A2
	BnaA05g29110D	0.00727623	-0.0144462	HLIP
	BnaC09g45670D	-0.0069434	0.0146075	ASPG2
	BnaA05g09840D	-0.00584275	-0.0150806	SPL3
	XLOC_105027	-0.00653715	-0.014792	-
	BnaA08g15160D	0.00475035	0.0154494	PUB5
	BnaC02g19720D	0.00578611	-0.0150895	At1g70260
	BnaAnng25630D	0.00717042	-0.014482	HDG8
	BnaC03g05850D	0.00584075	0.0150666	tal2
	BnaA05g07580D	0.00586722	0.0150529	UGT73C5
	BnaA04g22640D	-0.00688326	0.014615	ELF4
	BnaC07g26280D	0.00583863	0.0150606	NSP5
	BnaA03g00560D	0.00638004	0.0148372	SG1
	BnaA09g19060D	0.00678466	0.0146542	GSTZ1
	BnaCnng63430D	0.00601785	0.0149842	AOX1A
	BnaA04g18630D	-0.00657412	0.0147459	-
	BnaC05g46380D	0.00689299	-0.0145987	PPD7
	BnaA10g25800D	-0.00644323	0.0148019	BSMT1
	BnaA02g02560D	-0.00643639	-0.0148045	GASA4
	BnaC08g18330D	0.00697885	-0.0145531	PKS3
	BnaUnng04460D	0.00620246	0.0149	-
	BnaA04g00820D	0.00625301	0.0148736	SDR1
	BnaCnng47330D	0.00592056	0.015004	UGT73B3
	BnaC07g35210D	0.0071637	-0.0144425	-
	BnaA09g04540D	-0.00496618	-0.0153271	-
	BnaA07g15860D	-0.00618212	0.0148769	-
	BnaA03g01870D	0.00622111	0.0148577	Dnajc2
	BnaC08g39480D	0.00722343	-0.0143927	IDD6
	BnaC02g15280D	0.00578217	0.0150248	LTI65
	BnaC07g26660D	-0.00609239	0.0149012	RIN4
	BnaC09g12250D	-0.00715987	0.0143931	-
	BnaC08g02490D	0.00542359	0.0151212	GAT1
	BnaA09g06690D	-0.00681256	-0.014548	PSAN
	BnaC02g03490D	0.00513548	0.015211	METTL7A
	BnaA03g22900D	-0.00692211	0.0144854	CYP711A1
	BnaC08g48830D	-0.00579699	-0.0149644	UPP
	BnaC09g20050D	0.00578915	0.0149654	PVA21
	BnaCnng02630D	0.00509876	0.0152125	PSK5
	BnaA07g16550D	-0.00665781	-0.0145893	PMR6
	BnaC03g17560D	-0.00627624	0.0147568	-
	BnaC03g31540D	0.00713786	-0.0143588	YLS9
	BnaA03g56540D	-0.00597486	-0.0148795	-
	BnaA06g27750D	-0.00635938	-0.0147175	SPAC17H9.04c
	BnaA06g02110D	-0.00604807	-0.0148424	GLP1
	BnaC04g41500D	-0.00661341	0.0145967	GSL-OH
	BnaC08g43820D	0.00687034	-0.0144662	IAA3
	BnaA06g15800D	0.00463479	0.0153146	-
	BnaA10g15210D	-0.00609821	-0.01478	CRL
	BnaA10g00460D	0.00512419	0.0151445	-
	BnaA05g29620D	-0.00548884	-0.0150129	At3g08610
	BnaC08g01600D	-0.00666745	0.0145253	-
	BnaCnng06170D	0.00594353	0.0148342	HSFA1E
	BnaA02g35610D	-0.00579983	-0.0148908	-
	BnaCnng24120D	-0.00502731	0.0151685	-
	BnaA10g09800D	0.0067675	-0.0144755	-
	BnaCnng61800D	0.00728851	-0.014213	At1g32860
	BnaAnng00160D	-0.00638013	-0.0146425	LHCB4.2
	BnaA07g00980D	0.00535198	-0.0150474	MIOX2
	BnaA02g01660D	-0.00706809	0.0143175	-
	BnaC03g31450D	-0.00694878	0.0143715	-
	BnaA03g02950D	-0.00586221	-0.0148469	PAS2
	BnaA08g12600D	-0.00495849	-0.0151689	Chac1
	BnaCnng18310D	0.00590518	0.014819	At3g03070
	BnaA06g31110D	-0.00571344	-0.0148916	EXPA5
	BnaCnng68340D	-0.00659747	0.0145214	GYP7
	BnaAnng39850D	0.00582479	0.0148473	-
	XLOC_071009	-0.00659877	-0.0145163	-
	BnaA08g22400D	0.0072396	-0.0141965	PKS3
	BnaC02g37620D	0.00599589	0.0147624	AIG2
	BnaA03g17400D	0.00552199	0.0149422	AKR4C9
	BnaA07g28470D	-0.00541433	0.0149811	GSTU11
	BnaA05g01960D	0.00652771	-0.0145228	YPQ1
	BnaC05g08850D	-0.00618498	-0.0146713	HOP2
	BnaC03g74220D	0.00689259	-0.0143502	GAUT8
	XLOC_076999	0.00645955	0.0145471	-
	BnaC07g38000D	-0.00653572	0.0145123	CRK5
	BnaC07g26380D	-0.00710051	0.0142432	-
	BnaA10g02050D	-0.00675332	-0.0144101	PORC
	BnaC03g11250D	-0.00585067	0.0147972	LECRK17
	BnaC03g52570D	0.00705256	-0.0142599	PME34
	BnaCnng24430D	-0.00572959	-0.0148405	SCPL13
	BnaAnng07080D	0.00649267	0.0145225	RABD2B
	BnaC08g06690D	-0.00705237	0.0142573	ANN1
	BnaCnng54590D	-0.00606223	0.0146995	PAD4
	BnaA02g09020D	-0.00604597	-0.0146972	-
	BnaC04g08440D	0.00543265	0.0149316	UGT73C5
	BnaA07g33240D	0.00522189	0.0150061	SKP2B
	BnaA07g32090D	-0.00622865	-0.0146116	TUBB1
	BnaC09g36390D	-0.00665137	-0.0144233	At3g17210
	XLOC_036950	-0.00674695	0.0143758	-
	BnaA09g37590D	0.00561231	0.0148462	ABCC10
	BnaC09g33450D	0.00656173	0.0144513	CKX3
	BnaC05g28300D	0.00614596	0.0146317	UGT91C1
	BnaA03g27740D	0.00522042	0.0149855	AFP4
	BnaC02g46580D	-0.00649004	0.0144762	-
	BnaC03g34490D	-0.00700269	0.0142345	STP6
	BnaC04g35250D	0.00642537	-0.0145001	-
	BnaA08g22200D	0.00708957	-0.0141855	-
	BnaC08g14920D	-0.00642127	-0.0144949	RKS1
	BnaA09g50990D	0.00446093	0.0152094	NET1C
	BnaA06g02350D	0.00636351	0.0145027	At1g51440
	BnaA09g50750D	0.00534181	0.0149081	PCS2
	BnaA03g08110D	0.00604453	-0.0146359	SUS1
	BnaC07g18100D	0.00599626	0.0146531	CYP71B11
	BnaA06g01750D	-0.00661581	-0.0143837	-
	BnaC06g29970D	0.00736896	-0.0140123	-
	BnaC01g06500D	-0.00635489	0.0144965	ARR10
	BnaC03g71760D	-0.00707603	0.0141562	SDN2
	BnaC09g38470D	-0.00504342	-0.0149881	-
	BnaC06g11040D	-0.0069684	-0.0141938	PSAG
	BnaA05g37350D	0.00612326	0.0145697	At1g64760
	BnaC05g12500D	-0.00722591	0.0140555	2018-10-06
	BnaA09g40630D	0.00721062	-0.0140583	PMI1
	BnaA10g15690D	0.00620101	0.0145274	CCR1
	BnaA07g12150D	-0.00624239	-0.0145084	RALFL34
	BnaAnng02380D	0.00537873	0.0148476	ALY2
	BnaC01g41180D	0.00636006	0.0144539	MYB39
	BnaA04g28730D	0.00607745	0.0145746	-
	BnaA01g15280D	-0.00670236	-0.0142973	At4g26100
	XLOC_010322	-0.00596262	-0.0146145	RPL39A
	BnaC01g11810D	0.00702782	-0.014129	NFD4
	BnaC01g44850D	-0.00541999	-0.0148184	ARF32
	XLOC_015675	-0.00585653	0.0146512	-
	BnaA03g06200D	-0.00643266	0.0144048	MCC1
	BnaA06g40970D	-0.005946	-0.0146056	-
	BnaC02g00070D	-0.00606345	0.0145572	TMT1
	BnaC04g32910D	0.00623827	0.0144732	-
	BnaA09g29110D	0.00598361	0.0145798	MED37D
	XLOC_007926	-0.00572986	0.0146792	AL4
	BnaCnng29060D	0.00599277	0.0145735	At3g02090
	BnaA03g29970D	0.00684371	-0.0141836	PUB9
	BnaC08g46960D	-0.00628688	0.0144385	serinc
	BnaC06g28830D	-0.00598544	-0.0145658	KCR1
	BnaA05g33230D	0.00525439	0.0148346	Ggact
	BnaA07g08050D	0.00556885	0.0147191	-
	BnaC03g41300D	-0.00633715	-0.0144007	VIII-1
	BnaA03g10310D	0.00701438	-0.0140727	VIN3
	BnaC04g48570D	-0.00529176	-0.0148032	PAR1
	BnaA09g00080D	0.00587859	0.0145785	RVE5
	BnaAnng28650D	0.0068043	0.014166	UBC30
	BnaA03g43750D	0.00685368	-0.014137	-
	BnaC08g23150D	0.00516953	0.0148332	ACX4
	BnaC02g04820D	-0.00684557	-0.0141376	RPL10
	BnaC02g35940D	0.00526657	0.0147844	CYP71B19
	BnaA05g23460D	-0.00570905	-0.0146162	TIP2-1
	BnaA09g36770D	0.00599505	0.0144971	PXM16
	BnaA04g18200D	0.00523208	0.014785	-
	BnaCnng40400D	0.00515075	0.0148114	-
	BnaC06g29610D	-0.00721189	0.0139227	rngB
	BnaC06g04480D	-0.00567335	0.0146168	UGT89A2
	BnaA09g02480D	0.00669671	-0.0141711	EXPA5
	BnaA07g20770D	0.00565301	0.0146054	TGA7
	BnaC01g08110D	-0.00571454	-0.0145742	XTH20
	BnaC05g35990D	0.00618768	0.0143672	-
	BnaA03g14700D	0.00546863	0.0146553	UGT74D1
	BnaA03g00350D	0.00693867	0.0140175	TAAC
	BnaC08g48140D	-0.0064532	-0.0142456	At4g17560
	BnaA09g32910D	-0.00554687	0.0146177	PUB22
	BnaA07g37780D	0.00703097	-0.013964	-
	BnaC03g03360D	-0.00589574	-0.0144779	-
	BnaC06g06390D	-0.00649272	-0.0142201	FAP3
	BnaC06g14030D	0.00722323	-0.0138622	HIPP26
	BnaAnng20840D	-0.00660978	0.0141644	LECRK92
	XLOC_099424	-0.00507618	0.0147782	-
	BnaC05g34540D	-0.00692747	0.0140025	NUCL2
	BnaA08g13720D	-0.00665645	-0.0141306	At4g28440
	BnaA07g28680D	-0.0067016	-0.0141082	Zmynd15
	BnaA01g35260D	0.00553345	0.0146053	SLC25A16
	BnaC07g38310D	0.00510191	-0.0147615	-
	BnaC02g18600D	-0.00705882	0.0139277	KEA4
	BnaC05g17420D	-0.00686995	0.0140179	UGT85A2
	BnaC05g02440D	0.00504241	0.0147704	At1g04350
	BnaA09g27040D	0.00572909	0.0145137	HO1
	BnaA05g00280D	0.00567286	0.0145319	At3g01520
	BnaC03g57140D	-0.00662552	-0.0141188	EB1A
	BnaA03g40260D	-0.00653507	-0.014158	TDR
	BnaA09g03190D	-0.0065576	-0.0141467	At5g48900
	BnaC03g57700D	-0.00640912	0.0142097	APT1
	BnaC01g38160D	-0.00404745	0.0150507	IJ
	BnaC03g25510D	0.00511573	0.0147166	PIP1-2
	BnaC05g15860D	0.00549082	0.0145765	At1g04910
	BnaC05g44870D	0.00680712	0.0139982	At3g07100
	BnaA10g14600D	-0.00577656	0.0144507	AAO1
	BnaA07g37270D	-0.0064976	0.0141381	SCL1
	BnaA05g01190D	0.00622941	0.0142549	ATHB-7
	BnaC05g48750D	-0.00685073	0.0139646	NPF5.9
	BnaA06g02010D	0.00619449	0.0142678	IAA18
	BnaA10g07790D	0.00650211	-0.0141289	NEET
	BnaA01g07160D	-0.00628756	0.0142218	CFIS1
	BnaCnng60860D	0.0063219	0.0142064	SRG1
	BnaCnng29130D	0.0064552	0.014136	PTB
	BnaA09g05170D	0.00678563	-0.0139749	RUP2
	BnaA08g29920D	-0.00690588	-0.0139155	-
	XLOC_099939	-0.00608743	0.0142897	-
	BnaC07g21340D	0.00583031	0.0143938	PAP8
	BnaC05g47720D	0.00656132	0.0140751	-
	BnaCnng61390D	0.00506805	0.0146782	FLS1
	BnaC03g58740D	-0.00665035	0.0140306	VOZ1
	BnaA04g17810D	0.00617791	0.0142422	PTI12
	BnaA09g06820D	-0.00610879	0.0142692	PYD3
	BnaA09g15440D	-0.00584101	-0.0143788	-
	BnaA05g19620D	0.00617463	0.0142364	-
	BnaC07g17130D	-0.00725915	0.0137148	-
	BnaC04g13040D	-0.00667825	-0.0139967	RPS3C
	BnaC02g01760D	0.0059474	-0.0143154	SOT15
	BnaA09g15080D	-0.00581926	-0.0143674	CYP96A15
	BnaC07g35840D	-0.00602092	0.0142825	-
	BnaA06g38890D	0.0069951	-0.0138266	-
	BnaC03g36940D	-0.00682875	0.0139087	WUN1
	BnaC08g25990D	0.00710236	-0.0137701	ABCG18
	BnaA05g36610D	-0.00684108	-0.013899	-
	BnaA01g32240D	-0.00664157	-0.0139945	-
	BnaC03g52080D	-0.007127	0.0137532	HSFB2A
	BnaA09g36710D	0.00528424	0.0145573	AGL18
	XLOC_030801	-0.00510678	0.0146141	SAPK3
	BnaAnng19560D	-0.00666617	0.0139654	LanA
	BnaC07g12990D	-0.00560854	0.0144222	-
	BnaC03g00910D	-0.00523497	-0.0145585	At5g02760
	BnaA06g32490D	-0.00723815	0.0136731	ARP2
	BnaCnng12240D	0.00704044	-0.0137738	DOF1.3
	BnaA07g06370D	0.00535578	0.0145054	-
	BnaA03g28120D	-0.0057662	0.0143441	At1g05000
	BnaC01g10100D	-0.00671963	0.0139114	ERF1A
	BnaA08g15470D	-0.0054513	-0.0144543	At4g37220
	XLOC_104891	-0.00675302	0.013893	-
	BnaC09g28080D	0.0073172	-0.0135992	NEET
	BnaA06g34160D	0.00639024	0.014056	GSTZ1
	BnaCnng30950D	0.00565541	0.0143654	-
	BnaC05g47430D	0.00696477	-0.013775	At3g12360
	BnaC01g15060D	-0.00690626	0.0138042	CORI3
	BnaCnng21650D	0.00569874	0.0143447	mkkA
	BnaA02g03330D	0.00612045	0.0141671	atad3-b
	BnaA02g05340D	-0.00545336	0.0144359	CKX7
	BnaA05g34320D	-0.00601737	0.0142076	gemin2
	BnaC02g39100D	0.00563811	-0.0143612	NRD1
	BnaA10g18310D	0.00729104	-0.0135959	gpsn2
	BnaAnng35340D	-0.0052971	0.0144845	VQ1
	BnaA06g12590D	-0.00639702	0.0140312	rngB
	BnaC07g38900D	0.00631638	0.0140667	TFIIA-S
	BnaC07g11960D	-0.00682399	0.0138227	CYB561D
	BnaA10g13110D	-0.00600356	0.0141977	LECRK18
	XLOC_065903	0.00620412	0.014108	-
	BnaA09g33460D	0.00607879	0.0141597	fluG
	BnaA05g03540D	0.00622072	0.0140954	SNRNP40
	BnaA09g18600D	-0.00675391	-0.0138439	RPS17
	BnaC09g08390D	-0.00569576	-0.0143098	AZI1
	BnaA07g35330D	0.00550621	0.0143835	NIP6-1
	BnaA03g13140D	0.00682631	0.0138056	LTP3
	BnaA03g24010D	-0.00648573	0.0139682	MYB6
	BnaC05g43570D	-0.00556977	0.0143553	At3g09310
	BnaCnng68730D	-0.00592853	-0.0142109	ARALYDRAFT_915107
	BnaA09g50360D	-0.00668899	-0.0138681	HDG2
	BnaA09g09840D	0.00684877	-0.0137887	IBH1
	BnaA05g26380D	0.0063619	0.0140173	At3g12800
	BnaC05g50820D	0.00413125	0.0148282	PBS1
	BnaA03g30560D	-0.00643513	-0.0139827	RPS23B
	BnaA03g59400D	0.00664925	0.0138819	AAP1
	XLOC_037682	-0.00548054	-0.0143812	CYP96A15
	BnaC07g40900D	-0.00600788	-0.0141632	PORB
	BnaC01g35240D	0.00656408	0.0139109	KINESIN-13A
	BnaC05g02150D	-0.00671544	-0.013833	FLA9
	BnaC02g03280D	-0.00586749	0.0142113	-
	BnaA09g29410D	-0.00626618	-0.01404	PRE6
	BnaA07g19810D	0.0066919	0.013841	-
	BnaA06g34780D	-0.00632448	-0.0140121	-
	BnaC04g25990D	0.00726191	-0.0135495	MYOB7
	BnaA03g21080D	0.00670541	-0.0138274	SCL27
	BnaAnng38310D	0.00656638	0.0138792	TOPP2
	BnaA01g11040D	-0.00733937	0.0134765	PXM16
	BnaCnng00020D	0.00741209	-0.0134366	BGLU3
	BnaA03g42560D	-0.00673615	0.0137865	BHLH3
	BnaA07g00540D	0.00676905	0.0137678	TOM2AH3
	BnaA03g17570D	-0.00684307	-0.0137274	CAC3
	BnaC07g39600D	-0.00737651	0.0134464	At4g25390
	BnaA05g05840D	0.0064296	0.0139237	RCA
	BnaA03g00800D	0.00680643	0.0137392	-
	BnaC06g38540D	-0.00586873	-0.0141648	BXL7
	BnaC03g61740D	-0.00584463	-0.0141737	At4g37220
	BnaC03g45040D	-0.00659154	-0.013842	-
	BnaC06g34390D	0.00564466	0.0142487	CSE
	BnaA08g02930D	0.00655011	0.0138542	NUCL1
	BnaC03g12980D	0.00725331	-0.0134973	VIN3
	BnaC02g39460D	0.00530026	0.0143766	CER2
	BnaC06g38810D	-0.00658786	0.0138334	VQ9
	BnaC03g70440D	0.00582104	0.0141724	Os07g0301200
	BnaC03g33170D	0.00658187	-0.0138283	ZFN1
	BnaC03g25160D	-0.00660278	-0.013818	-
	BnaA05g24540D	-0.00654193	0.0138393	DJ1A
	BnaA02g15320D	0.00420719	-0.0147116	MYB6
	BnaCnng60710D	-0.00592512	0.0141045	NAC090
	XLOC_063556	-0.00622694	0.0139727	-
	BnaA09g17290D	0.00623542	-0.0139682	Hdhd3
	BnaCnng33810D	0.00508326	0.0144246	BAC2
	BnaC06g34090D	-0.00666232	0.0137623	At1g72960
	BnaC05g12910D	-0.00648515	0.0138465	ALG9
	BnaC03g39150D	0.00697674	0.0136052	brix1
	BnaC05g32180D	0.00682425	-0.0136806	2018-10-04
	BnaA03g33760D	-0.00667081	-0.0137484	Ap5z1
	BnaC04g09030D	0.00704125	-0.0135619	ABI5
	BnaA09g41810D	-0.00724088	0.0134543	TET8
	BnaC07g42660D	0.00571318	0.0141685	CCR2
	BnaCnng29140D	-0.00662259	0.0137667	-
	BnaA04g10530D	-0.00670001	0.0137285	At5g40670
	BnaA05g24910D	-0.00692553	0.0136141	CYP72A13
	BnaA06g33730D	0.00722209	-0.0134591	WRKY3
	BnaC05g46260D	0.00682241	0.0136629	-
	BnaC03g43200D	-0.00718249	0.0134695	At1g67520
	BnaA03g04240D	0.00505124	0.0144039	NAC083
	BnaA03g56610D	-0.00686301	0.0136293	At2g39910
	BnaA10g12030D	-0.00692001	-0.0135992	slr1780
	BnaAnng06130D	0.00533136	0.0142948	AGAL1
	BnaC02g20410D	0.00607833	-0.0139924	MLP28
	BnaA06g26320D	-0.00668016	0.0137135	SWEET12
	BnaA04g00910D	0.00627711	0.0138976	PP2A13
	BnaA07g28040D	0.00632093	0.0138771	METTL7A
	BnaC08g37940D	0.00553119	0.0142077	GSTU24
	BnaA09g39470D	0.00600443	-0.0140133	SAUR32
	BnaC09g41820D	-0.00572468	0.0141243	GSTT3
	BnaCnng50910D	-0.0055912	0.0141771	-
	BnaC03g18390D	-0.00721061	0.0134258	At3g58370
	BnaAnng12350D	0.00612076	0.0139559	ANP2
	BnaC04g49110D	-0.00680542	-0.0136266	-
	BnaA06g11310D	0.00656163	-0.0137451	-
	BnaA06g31690D	-0.00615733	-0.0139274	At3g28040
	BnaC09g03260D	-0.00652688	-0.0137571	At5g27670
	BnaA08g03820D	0.00509535	-0.0143449	At1g47380
	BnaA09g15200D	-0.00607593	-0.0139547	CYB
	BnaC08g16460D	0.00639641	-0.0138075	-
	BnaA08g28710D	-0.00691692	-0.0135517	PSBP
	BnaC03g04760D	0.00567021	-0.0141178	NAK
	BnaAnng12070D	0.00634899	0.0138224	MED37E
	BnaA04g15490D	-0.00686772	-0.0135699	At2g26730
	BnaA09g42520D	-0.00497099	0.0143726	At5g37990
	BnaA03g06760D	-0.00697246	-0.0135058	PSRP6
	BnaC09g34000D	-0.00719432	0.0133824	PLC5
	BnaA02g33580D	-0.0070276	0.0134666	-
	BnaA10g00950D	-0.00615079	-0.0138844	TOC33
	BnaA03g24550D	-0.00687736	-0.0135378	EFTS
	BnaC05g39570D	-0.00605795	-0.013923	BGAL1
	BnaA01g02470D	-0.00578162	0.0140343	CIB22
	XLOC_047194	0.00681688	0.0135613	-
	BnaC03g16130D	0.00636082	0.0137774	FRI
	BnaC04g55130D	0.00700496	-0.0134578	-
	BnaC07g28900D	-0.00714049	0.0133858	HEM15
	BnaC09g36910D	-0.0072721	0.0133122	AAO1
	BnaC01g35670D	0.00567968	0.0140609	TPR4
	BnaC06g18510D	-0.00672024	-0.013594	At3g62400
	BnaC04g48150D	0.00701418	-0.0134444	SPL9
	BnaA02g03440D	0.00580054	0.0140081	GSTF12
	BnaA10g28210D	-0.00689276	-0.0135037	BGAL5
	BnaA03g04520D	0.00623817	0.0138123	TRP4
	BnaA05g24030D	-0.00588983	0.0139579	-
	BnaC03g04350D	-0.00644484	-0.0137104	PAS2
	BnaC01g37590D	0.00602071	0.0138999	AGP12
	BnaA09g25770D	-0.00693592	0.0134571	-
	BnaA06g24440D	0.00644135	0.0136989	At5g65560
	BnaA02g23180D	-0.00701528	0.0133994	CYP74A
	BnaC09g46540D	-0.00625	0.0137728	FLC
	BnaC07g24950D	-0.00716433	0.0133178	At5g40210
	XLOC_076931	0.00454248	-0.0144232	-
	BnaUnng00120D	-0.00642603	-0.0136877	-
	BnaA02g02530D	0.00591908	0.0139113	-
	BnaA01g11280D	0.00620764	0.0137822	MYB39
	BnaA05g29190D	0.00613783	0.0138096	-
	BnaA03g41520D	-0.00728455	0.0132388	HMGB1
	BnaA02g27880D	-0.0062644	0.0137507	CYP71B3
	BnaC06g27940D	0.00649375	-0.0136436	TCP15
	BnaA04g12570D	-0.00725889	0.0132497	SK1
	BnaA02g05230D	0.00622159	0.0137671	AAO
	BnaA08g07700D	0.00508403	0.014222	-
	BnaA08g29630D	-0.00683566	-0.013463	BUB3.2
	BnaC04g00210D	-0.00611743	-0.013802	GEP
	BnaA03g29810D	0.00599943	0.0138479	NSN1
	XLOC_085351	-0.00709098	0.0133196	AAP5
	BnaAnng39130D	-0.00658964	-0.0135716	-
	BnaC06g39200D	-0.00699052	0.0133644	-
	BnaA03g51030D	-0.00549863	-0.0140432	KCS16
	XLOC_081764	0.00609664	0.0137937	-
	BnaCnng45370D	-0.0054964	0.0140371	-
	BnaA03g28400D	0.00519202	0.0141523	MS2
	BnaC05g43390D	0.00703375	0.0133323	PAH1
	BnaC03g36050D	-0.00732133	0.0131759	PAT16
	BnaA03g35650D	-0.00650953	0.0135946	APUM5
	BnaA10g20060D	-0.00596207	0.0138403	TIFY9
	BnaC02g45750D	0.00695722	-0.0133561	elmoA
	BnaC09g02490D	-0.00648302	-0.0135851	Rv1262c
	BnaC04g33430D	0.00699937	-0.013326	SFH3
	BnaC08g13940D	-0.00690264	-0.0133763	At1g10030
	BnaA01g35070D	0.00501133	0.0141915	TRE1
	BnaC08g27150D	0.00573776	0.0139083	Slc38a3
	BnaC09g06210D	-0.00694202	-0.0133465	PSAN
	BnaC03g09860D	0.00623039	0.0136917	GONST4
	BnaA03g07890D	-0.00711544	0.0132472	MPC1
	BnaA06g33290D	0.00669135	0.0134663	-
	BnaC06g11160D	-0.00739882	0.0130898	TIM50
	BnaC05g12850D	0.00673999	-0.013439	-
	BnaC05g40920D	-0.00678688	-0.0134143	PGIP1
	BnaC02g13860D	0.00596122	0.0138006	At5g53970
	XLOC_103997	-0.0070766	0.0132611	At1g77405
	BnaA09g33430D	-0.00695419	0.0133231	UGT73D1
	XLOC_086289	0.00558792	0.0139478	-
	BnaA02g21330D	-0.00715171	0.0132127	HOP3
	BnaC09g40620D	0.00625167	-0.0136588	GAD1
	BnaC07g44260D	0.00684523	-0.0133709	GSVIVT00026920001
	BnaA02g00870D	0.00559988	0.013937	RH56
	BnaC02g48850D	0.00697664	-0.0133005	-
	BnaC01g40230D	0.00581453	0.0138467	APY1
	BnaC05g08120D	-0.00538545	-0.0140156	At1g48100
	BnaC01g39170D	0.00519462	0.0140857	GSTU8
	BnaC01g06660D	-0.00620567	0.0136679	WRKY18
	BnaC05g03670D	0.00569669	0.0138871	UGT75B1
	BnaC05g14770D	0.00554722	-0.0139462	DDB_G0292028
	BnaC02g40870D	0.00609294	0.0137132	CYP71B11
	BnaA06g20490D	-0.00661846	-0.0134634	DCL
	BnaA09g17930D	-0.0059183	-0.0137831	KAS1
	BnaA04g08530D	-0.00668976	0.013424	-
	BnaC04g35080D	0.00682162	0.0133562	NET2D
	BnaA09g36240D	0.0074105	-0.0130338	PAT04
	BnaC05g51950D	-0.00734904	0.0130683	-
	BnaA05g23860D	0.0060585	0.0137141	-
	BnaA09g03540D	0.00563137	0.0138894	PHL1
	BnaA09g23590D	-0.00525446	-0.0140347	DRT100
	BnaA02g25930D	-0.00685066	0.0133273	-
	BnaA03g08160D	-0.0065203	-0.0134915	-
	BnaC07g00140D	-0.00591259	-0.0137677	EXPB1
	BnaC01g37840D	0.00672872	0.0133878	T10C6.5
	BnaAnng29640D	-0.00628361	-0.0136	ARP1
	BnaC04g41900D	0.00566313	0.0138686	TBL40
	BnaA02g09960D	0.00617206	0.013644	At5g53970
	BnaA05g19650D	-0.00598744	0.0137239	-
	BnaC02g44480D	-0.00659917	0.0134375	GATA21
	BnaC07g36420D	0.0065658	0.0134515	At4g20830
	BnaC02g42730D	-0.00635658	-0.0135514	BGAL6
	BnaA06g22540D	0.00641543	0.0135236	-
	BnaC07g38080D	0.00664621	0.0134115	CRK17
	BnaA03g40080D	0.00562741	-0.0138651	BHLH72
	BnaCnng70090D	0.00605782	0.0136795	PMAT1
	BnaA09g02320D	0.00699352	0.0132234	At5g15080
	BnaA02g04730D	0.0067676	-0.0133352	SPX1
	BnaA08g07500D	0.00735645	-0.013012	KAM1
	BnaA08g03240D	0.00579465	0.013777	-
	BnaA04g20160D	-0.00699625	-0.013205	TIC62
	BnaA09g53050D	-0.00663962	0.0133844	WDR44
	BnaA08g17260D	-0.00720477	0.0130843	RPL36AA
	BnaC05g43420D	0.00630549	0.0135396	RPL35A
	BnaC06g01770D	0.00478034	-0.0141494	ADAT2
	BnaC06g03920D	-0.00733704	0.0130084	HAUS4
	BnaC01g07700D	-0.00735051	0.0129952	At4g30660
	BnaA03g50940D	-0.00717218	0.0130918	kynB
	BnaC01g00730D	-0.00676089	-0.013306	ALKBH2
	BnaA03g52210D	-0.00672111	-0.0133199	ERF043
	XLOC_051897	-0.00559058	-0.0138311	GLPK
	BnaC03g06060D	0.00649297	0.0134279	TRP4
	XLOC_036918	-0.0069881	0.0131753	SEC31B
	BnaA08g17350D	-0.00610397	-0.0136062	At1g30440
	BnaA03g22330D	0.00641394	0.0134625	SAP3
	BnaC04g31250D	0.00609303	0.0136072	PMAT1
	BnaA09g17270D	0.0067165	0.0133084	2018-03-02
	BnaC07g44880D	0.0055842	0.0138201	CAD5
	BnaC02g15920D	-0.00633279	0.0134904	At5g51130
	BnaCnng69960D	0.005457	-0.0138664	CM1
	BnaA05g30280D	-0.005879	-0.0136887	A6
	BnaC03g12590D	0.00705045	0.0131221	FIPS5
	BnaA02g05650D	-0.00610466	-0.013577	-
	BnaC09g49470D	0.00729612	-0.0129712	ROPGEF5
	BnaCnng45600D	-0.00708127	0.0130869	At5g42250
	BnaA06g00320D	0.00535128	0.013883	At3g19950
	BnaC05g46930D	0.0059584	0.0136317	CYSD1
	BnaA02g11250D	-0.00652323	-0.0133705	Cog7
	BnaA03g57690D	0.00723966	-0.0129965	CYP82G1
	BnaC05g50610D	-0.00587807	-0.0136622	TUBA
	BnaA09g30040D	0.00584431	-0.0136736	-
	BnaC03g61060D	-0.00647412	0.0133867	CURT1D
	BnaC07g36340D	0.00561165	0.0137649	CTPS1
	BnaCnng04940D	-0.00622764	0.0134971	mhkB
	BnaA09g55830D	0.00615254	0.013531	CLPB4
	BnaCnng21220D	-0.0066246	-0.0133022	-
	BnaC09g36400D	-0.00533112	0.0138678	WRKY38
	BnaA09g51510D	0.00738018	-0.0128945	PDH-E1
	BnaA02g16460D	0.00656334	-0.0133191	NUDT21
	BnaA02g26000D	0.00564774	0.0137286	XTH27
	BnaC03g32950D	0.00641387	0.0133875	-
	BnaC07g09570D	-0.00536675	0.0138363	RFK1
	BnaA09g35550D	0.00577278	0.0136658	FER3
	BnaA07g33780D	0.00464384	0.0140886	-
	BnaA01g28120D	-0.00619155	-0.0134792	TIP2-1
	BnaAnng25760D	0.00619852	0.0134743	DTXL5
	BnaC04g19220D	0.00605945	0.0135346	Ankrd13b
	BnaA02g33090D	0.00492213	0.0139872	ML1
	BnaA02g02570D	0.00587622	0.013609	AVT1
	BnaC05g05890D	0.00608216	-0.0135099	AXS2
	BnaCnng18030D	-0.00561375	0.0137096	TSB
	BnaC04g26660D	0.00727357	-0.0129044	At5g41260
	BnaC09g39140D	0.00587843	0.0135964	BAM9
	BnaC08g39970D	-0.00694314	0.0130836	LSMT-L
	BnaA04g26130D	0.00518465	0.0138619	EMS1
	BnaC07g38560D	-0.00650115	-0.0132944	GSVIVT00026920001
	XLOC_036334	0.00626863	0.0134055	-
	BnaA09g18210D	-0.00650337	0.0132908	ERF5
	BnaC06g33320D	-0.00695291	-0.0130595	PIP20-1
	BnaA08g08170D	-0.0061557	-0.0134536	-
	BnaA03g59290D	0.00720649	-0.0129211	DIR19
	BnaC05g24280D	-0.00666948	0.0132024	OEP61
	BnaC01g03810D	0.0055957	0.0136907	OBF1
	BnaC05g44040D	-0.0057013	-0.0136446	-
	BnaC04g25760D	-0.00683995	0.0131068	ABCG19
	BnaA07g10340D	-0.00596374	-0.0135269	CCA1
	BnaA05g24350D	0.00684121	0.0131027	At3g15260
	BnaC05g07040D	0.00643973	0.0132985	TKPR1
	BnaC03g34980D	-0.00680634	0.0131122	At3g06920
	BnaA08g23190D	-0.00724243	0.0128745	ALAAT2
	BnaA09g47760D	0.0072564	-0.0128659	-
	BnaC07g30970D	0.00683646	0.013092	EXO70A1
	BnaC07g18840D	-0.00638239	-0.013319	-
	BnaA02g12570D	-0.00693873	-0.0130367	-
	BnaA04g03550D	-0.00614107	0.0134307	ERG1
	BnaC02g39110D	0.00506285	-0.0138722	IDE
	XLOC_085250	-0.00661735	0.0131974	4CLL3
	XLOC_086661	0.00645328	0.0132771	PME64
	BnaC04g39040D	-0.00742332	0.0127593	At4g29370
	BnaC03g15640D	-0.00650717	-0.0132479	CCB2
	XLOC_086500	-0.00632272	0.0133369	CALS1
	BnaCnng18390D	0.00671484	0.0131407	At1g51745
	BnaC04g47210D	-0.00699985	-0.0129846	HEME2
	BnaC05g42690D	0.00623232	0.0133665	spoIIIAA
	BnaA03g54400D	-0.00683321	0.0130684	APK2
	BnaA07g31420D	-0.00648557	0.0132428	CLPB1
	BnaC06g36850D	-0.00712991	0.0129054	ECH2
	BnaC05g37620D	-0.00671339	0.0131252	SEC11C
	BnaA04g23940D	-0.00635498	-0.0133006	ARP
	BnaC06g40110D	-0.00702419	-0.0129596	ATJ8
	BnaA01g35160D	0.00677415	0.0130901	CTR1
	BnaC04g39750D	0.0066795	0.0131379	-
	BnaA09g16850D	-0.00610573	-0.0134135	APS1
	BnaC09g49530D	-0.00561995	0.0136228	CYP71A1
	BnaA08g22510D	-0.00629094	-0.0133251	PSP
	BnaC06g27130D	-0.00531542	-0.0137417	HEXO3
	BnaAnng38870D	0.00681403	-0.013063	COL2
	XLOC_043406	0.00664238	0.013143	At5g15080
	BnaC03g08570D	0.00639919	0.013262	SPAC644.07
	BnaC01g39180D	-0.00647785	-0.0132216	-
	BnaA03g02350D	-0.00660204	-0.0131566	RING1
	BnaCnng76550D	-0.00586714	0.0134987	At3g60510
	BnaA09g24150D	0.00682903	-0.0130376	At1g32860
	BnaCnng43470D	-0.00633893	-0.013281	GPAT6
	BnaA06g07180D	-0.00501238	-0.0138326	XTH8
	BnaC02g09390D	-0.00682317	0.0130331	CAF1-11
	BnaA05g33350D	-0.00557193	0.0136129	-
	BnaA03g27900D	0.00524824	0.0137403	SAMDC3
	BnaA07g07360D	-0.00656596	0.0131595	-
	XLOC_079158	-0.0069646	0.0129521	-
	BnaA05g19010D	-0.00645831	0.0132116	CYP705A20
	BnaC03g16860D	0.0063964	0.0132408	CIPK11
	BnaC08g49850D	0.0071342	-0.0128575	At1g48100
	BnaA05g14760D	0.00614757	0.013356	AGO2
	BnaA01g20760D	0.00750594	-0.0126416	PME34
	BnaA01g32000D	-0.00703546	-0.0129086	OMR1
	BnaC09g42490D	0.00744567	-0.012673	At5g15350
	BnaA03g20560D	-0.00689647	0.0129772	TYRAAT1
	BnaA08g15760D	-0.00575005	0.0135227	VQ29
	BnaA08g13270D	-0.00721558	0.0127974	PRH
	BnaC09g13080D	-0.00599488	-0.0134121	-
	XLOC_057828	0.00592185	0.0134407	CYN
	BnaC08g31390D	-0.00600369	-0.013404	RHA1B
	BnaC03g72170D	0.00636982	0.013232	At2g38640
	BnaA02g25450D	0.0066387	0.0130991	-
	BnaC06g34640D	0.00667584	0.0130786	-
	BnaA03g04200D	-0.00706239	-0.0128731	PNSL5
	BnaA06g21800D	0.00649115	-0.0131633	-
	BnaA03g38380D	-0.00688215	0.0129612	RLM1B
	BnaC08g14500D	-0.00632563	-0.0132413	ACLA-1
	BnaA09g19940D	-0.00714885	0.0128115	ENT3
	BnaC01g30600D	0.00625209	0.0132697	ALF5
	BnaC02g35960D	-0.0069188	0.0129331	CYP71B22
	BnaC03g30020D	0.00548467	0.0135984	MSRB5
	BnaAnng17130D	0.00643462	0.0131746	MUB6
	BnaC05g45490D	0.00709599	0.0128297	SSM4
	BnaA03g33240D	-0.00688295	-0.0129432	-
	BnaA04g04890D	-0.00695478	0.0129022	RH38
	BnaA03g58550D	-0.00670474	-0.0130249	-
	BnaC03g11130D	0.00669894	0.0130239	ABCF1
	BnaC05g01140D	-0.007179	0.0127642	Cht10
	BnaA01g33410D	-0.00705333	-0.0128308	RPI3
	BnaCnng02050D	-0.00708112	-0.0128153	RPL5
	BnaAnng18280D	0.00682304	-0.012949	At4g36820
	BnaAnng35040D	0.00648233	0.0131208	-
	BnaC04g44220D	-0.00617004	-0.0132694	rps5
	BnaC07g12790D	-0.00649018	-0.013109	B3GALT17
	BnaCnng49800D	0.00607533	0.0133062	EXPA5
	BnaC07g46770D	-0.00674573	-0.0129748	ANT
	BnaC05g46940D	0.00658872	0.0130539	At4g25210
	BnaA03g37050D	-0.00639747	-0.0131457	RPL36AA
	BnaC04g40820D	0.00682964	0.0129263	YDA
	BnaCnng23820D	0.00613857	0.0132678	-
	BnaA03g19330D	0.00565587	0.0134769	CRK1
	BnaA07g26740D	-0.00689891	0.0128825	HSFA8
	BnaC04g23970D	-0.00681078	-0.012929	QKY
	BnaC07g28040D	-0.00715043	0.0127438	PNC2
	XLOC_089965	0.00643314	0.0131188	MT1C
	BnaA02g33200D	0.0056464	0.0134743	-
	BnaA03g00360D	0.00687219	0.0128896	RFFL
	BnaC02g07040D	0.00582453	0.0133935	NIT2
	BnaC04g14410D	0.00626547	0.013192	CIPK11
	BnaA01g13810D	-0.00633515	0.0131569	-
	BnaC04g49940D	0.00506148	-0.0136974	At3g03090
	BnaA09g31670D	-0.00673635	-0.0129554	-
	BnaA09g49350D	0.00502638	0.0137081	ECA4
	BnaA03g17020D	0.00570156	0.0134406	PIP2-2
	BnaC09g04200D	0.00720002	-0.0127001	COL4
	BnaC05g50810D	-0.00668457	-0.0129761	-
	BnaA03g39910D	0.00577758	0.0134029	EXO70A1
	BnaA09g37750D	-0.00582649	-0.0133817	ACR4
	BnaC05g24000D	0.00646882	0.0130796	neur
	BnaC03g66530D	0.00621802	0.0131966	ATL54
	BnaA04g24530D	-0.00725628	0.0126549	maoII
	BnaAnng11500D	0.00586263	0.013357	CER2
	BnaA02g08140D	0.00703432	-0.0127784	VIN3
	BnaC01g22410D	0.00605009	0.0132686	UGT84A3
	BnaC01g25960D	0.00642124	0.013086	WSD1
	BnaA01g22830D	0.00631518	0.0131344	BHLH112
	BnaA09g27480D	-0.00707424	0.0127394	-
	BnaC03g26090D	-0.0073474	0.0125834	SWI3A
	BnaA07g16280D	-0.00724079	0.0126442	PUMP1
	BnaC09g11730D	0.00640877	0.0130815	-
	BnaA04g02630D	0.00684247	-0.0128563	-
	BnaC09g47300D	0.00577129	0.0133691	ARI16
	BnaA07g15410D	0.00505093	0.0136538	pli1
	BnaC07g22990D	0.00741219	-0.0125291	BGLU3
	BnaC01g35960D	-0.00690209	-0.0128165	At1g52740
	BnaA07g06900D	-0.00655988	-0.0129931	PSAF
	BnaA03g26980D	-0.00637839	-0.0130812	PUX9
	BnaC09g44950D	0.00676946	0.0128796	CSE
	BnaA10g22800D	0.0074356	-0.0125053	FLS1
	BnaA07g34420D	-0.00524455	-0.0135707	EP1
	BnaC05g37230D	0.00575105	0.0133626	At3g16150
	BnaA09g01150D	0.00599325	0.0132555	-
	BnaC07g47480D	0.00724858	-0.0126102	BBX19
	BnaCnng72830D	-0.00693157	-0.0127857	RHM1
	BnaC09g37120D	-0.00561788	-0.0134084	-
	BnaC01g16590D	-0.00684756	-0.0128219	At4g24730
	BnaCnng29670D	0.00722348	-0.0126097	-
	BnaA08g11360D	-0.00726113	0.0125845	ERG1
	BnaA04g21880D	0.006147	0.0131629	SRG1
	BnaC07g43510D	-0.00661238	-0.0129352	At2g25060
	BnaA01g23770D	0.00623033	0.0131223	ALF5
	BnaC02g20640D	0.00681006	0.0128257	AGL12
	BnaA10g13930D	-0.00536848	0.0134892	NAC090
	BnaA08g17180D	-0.00692338	-0.0127607	RHF1A
	BnaA08g18180D	0.00671132	0.0128728	At4g14600
	BnaC09g33360D	-0.00687071	-0.0127861	-
	XLOC_021373	0.00693081	0.012753	-
	BnaC01g39050D	0.00580096	0.0132989	RPS6
	BnaA05g10730D	0.00645672	0.0129921	-
	BnaC03g62490D	-0.00573548	-0.013325	GA15091
	XLOC_042135	-0.00571876	-0.0133317	At4g02000
	XLOC_094285	-0.00721264	0.0125839	SPL7
	XLOC_061168	-0.00630739	-0.0130587	AFP1
	BnaC01g36570D	0.00556837	0.01339	LRR-RLK
	BnaC05g35580D	-0.00721244	0.0125807	SURF1
	BnaA09g37270D	-0.00629216	-0.0130637	BZIP61
	BnaA05g21460D	-0.00672772	0.0128442	MKS1
	BnaCnng22350D	-0.0062623	-0.0130764	DDB_G0290631
	BnaA02g28660D	-0.00671458	-0.0128478	rps21
	BnaC06g29140D	-0.0065241	0.0129455	HSFA8
	BnaA04g20300D	-0.00682467	-0.0127896	ATHB-14
	XLOC_042853	0.00571098	0.0133235	purH
	BnaC03g52010D	0.00678488	0.0128095	BFT
	BnaCnng01930D	-0.00657501	-0.0129134	CURT1A
	BnaCnng11270D	0.00754556	-0.0123701	-
	BnaC01g05870D	-0.00665053	0.012873	SPBC776.07
	BnaC01g34630D	-0.00586478	-0.0132461	-
	BnaC02g42910D	0.00735518	-0.0124796	At5g64080
	BnaA04g17200D	-0.00720296	0.0125602	At2g30020
	BnaCnng17960D	-0.00728064	0.0125114	-
	BnaA06g10230D	0.00560567	0.0133419	ABCG40
	BnaA01g05120D	-0.00504484	-0.0135636	OMT1
	BnaA08g18010D	0.0057845	0.0132632	IRKI
	BnaC07g12460D	-0.00708152	0.012618	At3g19950
	BnaC09g35940D	-0.00710361	0.0126041	LECRK19
	BnaA06g40530D	-0.00681619	0.0127618	At4g39580
	BnaC08g32310D	0.00545009	0.0134014	-
	BnaC04g08190D	0.00733842	-0.0124645	PAL1
	BnaA05g03020D	-0.00709099	0.0126067	PAPP5
	BnaA09g47980D	0.00692782	0.0126955	At1g11270
	BnaC07g42680D	0.00597853	0.0131687	LACE1
	BnaC03g25050D	-0.00692442	0.0126951	ERF034
	BnaA03g34610D	0.00706826	-0.012613	HYH
	BnaC05g46240D	0.00700072	0.0126443	-
	BnaA10g03930D	-0.0069154	0.0126893	ARI7
	BnaA06g05880D	0.00575115	-0.0132537	TGA4
	BnaC07g31230D	-0.00748807	0.0123525	-
	BnaC07g51050D	0.00661334	0.0128404	DTX1
	BnaA10g20160D	-0.00626866	-0.0130122	At4g18596
	BnaA04g22080D	-0.00699079	-0.0126382	WAX9A
	BnaAnng02320D	0.00566438	0.0132848	yipf1
	BnaC03g59700D	0.00622218	0.0130314	ABCC1
	BnaA03g00990D	0.00639916	0.0129417	At5g03630
	BnaA05g26080D	0.00691864	0.012671	pno1
	BnaC03g52500D	-0.00648387	0.0128889	Myg1
	XLOC_092630	-0.00677922	0.0127345	-
	BnaA09g11290D	0.0067257	0.012762	-
	BnaC01g41610D	0.00694535	-0.0126426	-
	BnaC03g34540D	0.00691087	-0.0126544	-
	XLOC_054614	0.00656436	0.0128352	CYP97B3
	BnaC07g48760D	-0.00697945	0.012614	RHA2B
	BnaA06g11880D	-0.00736127	0.0123931	RNP1
	BnaA02g01360D	-0.00688942	-0.0126587	CALS3
	BnaA01g08510D	-0.00586514	0.0131624	CBL1
	BnaC04g49440D	-0.005962	0.0131152	ARL
	BnaA10g07110D	-0.00698743	-0.0125982	-
	BnaC07g51280D	-0.00690974	0.0126405	CYP79B1
	BnaC03g33650D	-0.00605676	-0.0130669	LTL1
	BnaA02g07010D	-0.00696539	-0.0126041	SRR1
	BnaC07g04020D	-0.00701802	0.0125714	-
	BnaC08g27620D	-0.00588496	-0.0131376	-
	BnaCnng29070D	0.00598548	0.0130907	RPS19A
	BnaA01g11870D	-0.00511763	-0.0134532	Bp10
	BnaA08g11700D	-0.00681047	0.0126771	PEX4
	BnaA03g14810D	-0.00695407	0.0125975	Os03g0144800
	BnaC05g17560D	-0.00581566	0.0131603	-
	BnaC06g43580D	0.00549109	0.0132966	-
	BnaC09g13240D	-0.00694773	-0.012593	At1g62640
	BnaA06g37990D	-0.00648749	-0.0128346	-
	BnaC09g41100D	-0.00713966	0.0124826	EMB8
	XLOC_005903	-0.00542884	-0.0133155	-
	BnaA08g13200D	0.00649214	-0.0128298	At4g30140
	BnaA03g29170D	0.00665235	-0.0127461	BHLH150
	BnaAnng32230D	0.00688218	0.0126223	-
	BnaC02g05940D	-0.00671401	-0.0127114	RPS9B
	BnaA05g21530D	-0.00750049	0.0122562	PAT11
	BnaA01g01240D	-0.00609645	0.0130112	SAMT
	BnaC04g51610D	-0.00706038	-0.0125131	CURT1B
	BnaA09g34120D	0.00675078	0.0126746	-
	BnaA05g07290D	0.00590485	0.0130886	PIP2-2
	BnaA03g23150D	-0.00665229	-0.0127228	LAX2
	BnaA01g01220D	-0.00633701	0.0128819	-
	BnaA05g18660D	-0.00716065	0.0124362	AAP5
	BnaA07g05550D	0.00492678	-0.0134774	PERK1
	BnaA09g37600D	0.00540611	0.0132867	ABCC10
	BnaCnng55180D	-0.00508081	-0.0134132	Bp10
	BnaC06g43050D	-0.00611988	-0.0129718	TMM
	BnaC03g32790D	0.00626936	0.0128996	TCP13
	BnaA02g10470D	-0.00710722	-0.0124569	TIC32
	BnaC03g39460D	-0.00701596	-0.0125072	MFP1
	BnaA01g28140D	-0.00713955	-0.0124362	-
	BnaA01g00450D	-0.00630386	-0.0128772	AGP18
	BnaC07g41190D	0.00536081	0.0132952	COX6B-2
	BnaA02g02850D	0.00580782	0.0131023	ICME
	BnaC01g00330D	-0.00692728	-0.0125459	CESA2
	BnaC03g21860D	0.006354	0.012845	-
	BnaC03g61240D	0.0060018	-0.0130115	-
	BnaC07g26980D	0.00679525	-0.0126113	Gins4
	BnaA08g18370D	-0.00695589	0.0125147	NSL1
	BnaA03g27860D	0.00664538	-0.0126789	COL2
	BnaAnng14080D	0.00564797	0.0131527	SUFE2
	BnaA01g33400D	-0.00714857	-0.012399	RPS3A
	BnaAnng34150D	-0.00493564	0.0134339	-
	BnaA09g30050D	0.0068467	0.0125663	PME6
	BnaAnng25460D	-0.00704321	-0.0124514	-
	BnaC05g44940D	0.00607519	0.0129494	NSN1
	BnaC05g20530D	0.00743706	-0.0122163	NAC008
	BnaC07g28650D	-0.00607324	0.0129454	APC11
	BnaAnng41150D	-0.00661515	-0.0126758	IDD4
	BnaA10g24070D	0.00728688	-0.0122993	PGIP1
	BnaC09g41700D	-0.00695494	-0.0124895	-
	BnaA09g24140D	-0.00631922	0.0128223	-
	BnaC05g36500D	-0.00688553	-0.0125262	GSVIVT00026920001
	BnaA06g01810D	0.00679019	0.0125782	-
	BnaC06g23720D	-0.00636318	0.0127991	-
	BnaA06g12420D	-0.00720029	0.0123404	ygbJ
	BnaA03g14390D	0.0072589	-0.0123046	ADS2
	BnaA08g14950D	0.00564729	0.0131177	At4g35600
	BnaC09g09820D	0.00622532	0.0128488	MTX1
	BnaC02g13210D	-0.0070547	-0.0124103	TIG
	BnaC06g17850D	-0.00673066	-0.0125874	GATA4
	BnaC02g24420D	0.0065617	0.012672	CYP96A15
	BnaAnng15120D	-0.00704654	0.0124053	PYD3
	BnaC02g05610D	-0.00713358	-0.0123492	RH46
	XLOC_076255	-0.00635352	0.012768	CDKC-2
	BnaA07g21610D	0.00536684	0.0132117	-
	BnaC01g11650D	0.00621548	0.0128304	CYP707A1
	BnaA03g27750D	0.00640117	0.0127376	TCP13
	BnaA01g13880D	-0.0066529	0.012602	CG5412
	BnaAnng18970D	-0.0065572	-0.0126499	At4g15545
	BnaC03g32600D	0.0062552	-0.0127996	BPA1
	BnaC05g40000D	-0.00683083	-0.0125016	HMGB10
	BnaC04g45730D	0.00466563	0.013456	At2g38180
	BnaC06g36460D	-0.00646499	-0.0126896	TUBB1
	BnaA04g29190D	-0.00637348	0.0127357	PER21
	BnaC03g34210D	-0.00742838	0.0121477	PNC1
	BnaA08g30190D	0.00688372	0.0124642	IAA2
	BnaA07g06210D	0.00622659	0.012805	SAHH2
	BnaC04g43070D	0.00647436	0.0126811	RLP12
	BnaC06g14580D	-0.00641487	-0.0127111	LUL2
	BnaC03g24210D	-0.00682865	-0.0124885	RPL38A
	BnaC03g49690D	-0.00708859	-0.0123384	-
	BnaC03g40630D	-0.00621481	0.0128007	PUB29
	BnaA09g48030D	0.00731119	-0.0122076	At1g48100
	BnaA06g17350D	-0.00677768	-0.0125112	LHCA4
	BnaC06g32010D	-0.00627158	-0.012771	MLP31
	BnaC05g30210D	0.00672513	0.0125362	AOX1A
	BnaCnng68090D	0.00595493	-0.0129193	HVA22A
	BnaA06g14180D	0.00555691	0.0130951	erd-2
	BnaA06g00860D	0.00631398	0.0127421	At1g29970
	XLOC_032113	-0.00631532	0.012738	MYB122
	BnaA03g05620D	0.00700551	-0.0123693	At1g04910
	XLOC_085346	-0.00633268	0.012726	-
	BnaCnng11890D	-0.00667874	-0.0125461	FD2
	BnaA03g26260D	-0.00656112	-0.0126076	RPL19B
	BnaC09g39300D	-0.00625231	0.0127593	Gpr107
	BnaA07g00220D	0.00684915	-0.0124485	ELI5
	XLOC_076395	0.0061285	0.0128186	-
	BnaC05g47480D	0.00658171	0.0125903	APY1
	BnaC06g31800D	-0.00717503	0.0122615	CRRSP2
	BnaA07g31590D	-0.0070132	-0.0123525	CHLP
	BnaA05g24510D	-0.00646609	-0.0126471	-
	BnaAnng34060D	0.00591322	0.0129094	EXL1
	BnaA03g42770D	-0.00601674	0.0128594	1MMP
	BnaAnng29170D	0.00692434	0.0123925	At4g20830
	BnaA04g23250D	0.00533324	0.013155	HSFA1
	BnaA08g01690D	0.00620786	0.0127648	CHUP1
	BnaC04g15130D	0.00750177	-0.0120465	OEP161
	BnaA06g24350D	-0.00721776	0.0122165	-
	BnaC02g11970D	-0.00666726	0.0125218	BHLH35
	BnaC07g45710D	-0.00732858	0.0121445	At4g35600
	BnaA05g23610D	-0.00680634	-0.0124429	KINESIN-13A
	BnaCnng10740D	-0.00741735	0.0120863	At3g20650
	XLOC_066522	0.0064757	-0.0126158	MAX2
	BnaCnng29210D	-0.00703288	-0.0123065	SGR1
	BnaA09g38990D	-0.00710297	0.0122645	CRG1
	BnaC01g11690D	-0.00480404	0.0133319	-
	BnaC02g18770D	0.00660803	-0.0125356	WIT2
	BnaA09g28980D	-0.00725702	0.0121697	pin4
	BnaA05g05230D	0.00635552	0.0126639	PIP1-2
	BnaC04g08160D	-0.00655727	-0.0125597	ICR2
	BnaC03g73080D	-0.00475384	-0.0133454	XTH9
	BnaC02g10970D	0.00455435	0.0134121	-
	BnaA07g28310D	0.00605576	0.012804	ATHB-13
	BnaA06g21540D	0.00736579	-0.012092	IQD14
	BnaA08g01910D	0.00684918	0.012381	GATA28
	XLOC_087627	-0.00616071	0.012737	-
	BnaA08g26050D	-0.0062259	0.012703	IKU2
	BnaC09g03160D	-0.00676047	-0.0124243	At5g27450
	BnaC08g35570D	0.00506281	0.0132062	-
	BnaA09g47620D	0.00613328	-0.0127437	abkC
	BnaC08g30760D	-0.00711583	0.0122222	-
	BnaA02g05510D	-0.00689612	0.0123435	CAF1-11
	BnaA02g13460D	-0.00720603	0.0121646	TSM1
	BnaC08g27310D	-0.00640676	0.0126027	-
	BnaA05g01520D	0.00636736	0.0126208	GBF3
	BnaA02g05170D	-0.00560389	0.0129683	AAO1
	BnaA07g37420D	0.00645327	0.0125624	SDH1-1
	BnaA06g05470D	0.0071662	-0.0121691	PHYA
	BnaA10g19400D	0.00538903	0.0130514	CXE16
	BnaA10g08220D	-0.00683469	0.012349	AHL
	BnaC05g21050D	-0.00736864	0.0120367	ALB3L1
	BnaC05g47540D	0.00657848	0.0124822	At1g64760
	BnaA06g01210D	0.00710929	-0.0121874	-
	BnaC02g46320D	-0.00728671	0.0120821	-
	BnaC02g31310D	-0.00728089	0.0120813	petJ
	BnaC04g01570D	-0.00627276	-0.0126312	SCAB2
	BnaA01g09060D	-0.00631655	0.012609	KAT2
	BnaA03g48380D	-0.00706092	-0.0122046	FAD4L2
	BnaAnng34030D	-0.00660413	-0.0124496	-
	BnaA07g12900D	-0.00685032	-0.0123148	At2g26730
	BnaA03g20690D	0.00557825	0.0129381	MAP2A
	BnaCnng27970D	0.00722386	-0.0120956	clpB
	BnaC08g40500D	-0.0067457	0.0123686	ALA11
	BnaC08g13820D	-0.0074979	0.0119229	At3g01520
	BnaA03g29680D	-0.00646454	0.0125114	MORF3
	BnaC05g30800D	0.00732295	-0.012029	-
	BnaC04g01250D	-0.0065325	0.012475	CNGC3
	BnaA01g33650D	-0.00710092	-0.0121597	RPS16C
	BnaC03g64860D	0.00694274	0.0122494	ISU1
	BnaAnng06790D	-0.00644247	-0.0125101	PDCB1
	BnaC06g16920D	0.00724182	-0.0120629	GAUT15
	BnaA05g11930D	0.0074341	-0.0119435	RPT2
	BnaA08g14100D	-0.00647372	0.0124889	TSJT1
	BnaC05g35680D	-0.00662846	0.0124049	dnaJ
	BnaA08g30950D	0.00634648	-0.0125502	DREB1C
	BnaA03g21440D	0.0069211	0.0122386	-
	BnaC05g52070D	-0.00675225	-0.0123304	FLU
	BnaAnng39270D	-0.00664055	0.0123907	At1g76070
	BnaA05g07690D	0.00625748	0.0125831	VPS37-2
	BnaA05g09980D	0.00666519	0.0123695	At2g33700
	BnaC05g19270D	-0.00665444	0.0123751	FH4
	BnaC04g28390D	-0.00678242	-0.0123039	PSRP2
	BnaC03g33880D	-0.00592517	0.0127388	-
	BnaA10g07210D	-0.00673107	0.0123309	NRPB7L
	BnaA04g05490D	-0.0066807	-0.0123559	CP33
	BnaC09g53350D	-0.00681434	0.012277	-
	BnaA06g07540D	-0.00696089	-0.0121944	-
	XLOC_026402	0.00591792	0.0127315	ATHB-13
	BnaC02g35140D	-0.00531169	0.0129918	SOT11
	BnaA03g11490D	-0.00644541	-0.0124665	MAP65-1
	BnaAnng05440D	-0.00695209	0.0121871	rpc2
	BnaC04g05400D	-0.00641756	-0.012476	At2g39960
	BnaA04g28860D	-0.00719707	0.0120415	p20
	BnaC09g41020D	0.00661475	0.0123674	OPR1
	BnaC05g12380D	-0.00666905	-0.0123357	-
	BnaC08g21500D	-0.00718802	0.0120382	CYCD3-3
	BnaC09g30600D	-0.0067548	-0.0122837	WDR44
	BnaC01g14030D	0.00695547	0.0121692	TPPG
	BnaA10g13130D	-0.00732802	0.0119483	LECRK19
	BnaA01g10580D	-0.00700514	0.0121403	LSD1
	BnaA02g33410D	0.00678292	0.0122648	MYB306
	XLOC_027487	0.00655324	0.0123881	SIP1-1
	BnaC04g45720D	0.00623556	0.0125478	CAX1
	BnaC07g07300D	-0.00673758	-0.0122838	ROPGEF1
	BnaCnng58010D	-0.00713434	0.0120567	-
	XLOC_097225	-0.00579265	-0.0127545	PDCB5
	BnaC01g40120D	0.00595889	0.012675	IPUT1
	BnaC08g02890D	0.0046002	0.0132255	At1g49475
	BnaA05g08660D	-0.0075321	0.0118014	EDL3
	BnaCnng33310D	0.00609791	0.0126012	nphp3
	BnaC09g50830D	-0.00742858	0.0118645	BZIP34
	BnaC03g40840D	-0.00630608	0.0124972	AAE12
	BnaA02g36000D	-0.00635337	0.01247	-
	BnaA09g17470D	-0.0070066	-0.0121064	BRG1
	BnaA05g07730D	0.00648913	0.0123848	-
	BnaA02g14930D	0.0064683	0.0123944	-
	BnaA06g21470D	-0.00726086	0.0119459	HSFB2A
	BnaC05g48360D	-0.00732671	0.0119049	At3g02290
	XLOC_025252	0.00592754	0.0126572	DTX1
	BnaA09g23630D	-0.00665894	-0.0122874	At1g33475
	BnaA10g00470D	0.00652775	0.0123567	ACS2
	BnaA04g22260D	-0.00599683	0.012622	RF178
	BnaC07g15520D	-0.0073988	0.011852	RPN3A
	BnaC03g60120D	-0.00681824	-0.0121951	At1g75040
	BnaC09g12750D	0.00668962	0.012265	Imp4
	XLOC_053189	-0.00688871	-0.0121538	N
	XLOC_095193	0.00734256	-0.011885	TPPI
	BnaA02g26180D	0.00635319	0.0124379	KAN4
	BnaC06g23510D	-0.00704576	-0.0120582	FKBP17-3
	BnaC01g40410D	0.00603992	0.0125919	APRL5
	BnaC03g45610D	0.00644934	0.0123823	GASA7
	BnaC03g07120D	-0.00683652	0.0121711	Slc25a44
	BnaC07g08770D	0.0054283	0.0128607	ctps
	BnaC05g11750D	0.00658785	0.0123056	Wdr43
	BnaCnng75560D	-0.00649423	-0.0123529	RBK1
	XLOC_045597	-0.00668628	-0.0122489	-
	BnaC04g45750D	0.00628326	0.012459	-
	BnaA09g02500D	-0.00604068	0.0125778	NAC59
	BnaC06g35340D	-0.0065262	0.01233	MYB122
	BnaC03g32250D	-0.00637832	0.0124065	CML40
	BnaAnng11090D	-0.00621135	-0.0124909	At4g28100
	BnaC07g44010D	0.00662404	0.0122761	-
	BnaA05g28030D	-0.00691741	0.0121124	RTNLB16
	BnaCnng06210D	-0.00714328	0.0119771	P1
	BnaC09g49080D	0.00708875	0.0120079	pltp
	BnaA06g06210D	-0.00616521	-0.0125062	BPE
	BnaA06g21090D	0.00616795	-0.0125023	NAC062
	BnaA03g54800D	0.00666391	0.0122442	-
	BnaA02g23290D	-0.00705252	0.0120212	BKI1
	BnaA09g50050D	-0.00659089	0.0122793	GLX2-4
	BnaAnng37490D	-0.00620205	-0.0124771	RPL18AA
	BnaA09g04280D	-0.00693678	-0.0120818	UBP12
	BnaC03g22460D	-0.00718504	0.0119294	At2g40140
	BnaCnng39030D	0.00620724	-0.0124647	CG12206
	BnaA05g04190D	-0.00674907	0.0121769	MTACP1
	BnaA04g10810D	0.00749515	-0.0117314	DRB5
	BnaA05g00720D	0.0060273	0.0125466	GOLS1
	BnaC05g03130D	0.00668496	0.0122088	ANP1
	BnaC05g47390D	0.00597797	0.0125674	RPS16C
	BnaC03g72040D	0.00651359	0.0122965	AKR4C9
	BnaA02g09210D	0.00680828	0.0121358	SUMO1
	XLOC_079610	-0.00635871	0.0123734	-
	BnaA06g02530D	-0.00674625	-0.0121651	-
	BnaA07g36090D	0.00691161	0.0120686	-
	BnaA07g21290D	-0.00694738	0.0120456	At1g76660
	BnaC02g07400D	-0.0071899	-0.0119012	grpE
	BnaC03g17600D	0.00644642	0.0123175	GPX2
	BnaC02g04370D	-0.00711706	-0.0119404	At5g12850
	BnaA03g27030D	-0.00672894	0.0121606	QKY
	BnaC01g03230D	0.00702535	-0.0119889	-
	BnaA08g02570D	-0.00666574	-0.0121917	CRK8
	BnaC03g25600D	0.00621323	0.0124258	PUB54
	BnaCnng01870D	-0.0074451	0.0117287	UGT72B1
	BnaC02g03130D	-0.00642134	0.0123174	ATX1
	BnaCnng06040D	-0.00671595	0.0121533	ILR1
	BnaA06g25260D	-0.00726833	0.0118304	ARL2
	BnaA03g27080D	-0.00690197	0.0120477	-
	BnaCnng73010D	-0.00690142	-0.0120438	RPL6
	BnaAnng00180D	-0.00686975	0.0120614	nnt1
	BnaC04g51630D	0.00628875	0.0123739	APRR9
	BnaA06g12190D	0.00622634	0.0124046	-
	BnaA03g52840D	-0.00708861	0.0119297	Tprkb
	BnaAnng15510D	0.00614301	0.0124426	KCS3
	XLOC_040046	0.00610493	0.0124598	-
	BnaC01g07560D	-0.00681607	-0.0120848	At4g30825
	BnaA03g48610D	-0.00635199	-0.0123344	PORB
	BnaC08g22140D	-0.00571327	-0.0126417	-
	BnaA10g02110D	-0.00741471	0.0117182	At1g54610
	BnaC01g06040D	-0.00556146	-0.0127004	-
	BnaC08g10220D	0.00542746	0.0127571	UGT75D1
	BnaA10g04330D	-0.00660371	0.0121828	At1g06620
	BnaA04g25820D	0.00603597	0.0124733	-
	BnaC01g40370D	0.00606109	0.0124588	CkIalpha
	BnaA06g40180D	0.00730792	-0.0117705	-
	BnaA05g27390D	-0.00628764	0.0123456	-
	BnaA03g32640D	-0.00717139	0.0118526	ABCC3
	BnaCnng76770D	0.00626737	0.0123537	TIF4A-1
	BnaC01g06710D	0.0069389	0.0119876	WIN2
	BnaC02g22250D	0.0059308	-0.0125167	NUDT21
	BnaA01g32080D	-0.00703778	-0.0119292	SYP71
	BnaA03g36620D	0.00669852	0.0121228	AOX1A
	BnaC03g71930D	-0.00641702	-0.0122709	-
	BnaA05g05340D	0.00692033	0.0119935	MPK12
	BnaA07g06820D	0.00714556	-0.0118605	At4g14450
	BnaC07g27590D	-0.00731633	0.0117553	WRKY33
	BnaC02g42650D	-0.0073016	0.0117643	At5g63670
	BnaC07g05930D	0.00666358	0.0121367	-
	BnaC05g49970D	-0.0065982	0.0121715	PEPR2
	BnaC08g13010D	-0.00758142	0.0115792	LECRK72
	XLOC_088972	0.00626475	0.0123397	-
	BnaA10g20950D	0.00699468	-0.0119367	DREB3
	BnaC02g43410D	-0.00690076	-0.0119903	-
	BnaA09g57080D	-0.00684597	-0.0120214	ZHD4
	BnaC03g09060D	-0.0074006	0.0116843	IPUT1
	BnaA10g18650D	-0.00698976	-0.0119346	LNG1
	BnaA09g45840D	-0.00644186	0.0122369	FUT6
	BnaA03g31280D	0.00711319	-0.0118587	SMR1
	BnaC03g33180D	-0.00444418	0.0130943	PUB21
	XLOC_065068	-0.00495719	0.0129088	-
	BnaA05g11480D	-0.00651113	0.012199	GPN2
	BnaC09g12240D	0.0069986	-0.0119259	ERF061
	BnaA01g22950D	-0.00727584	0.0117583	-
	BnaA09g34660D	0.00614099	0.0123844	At4g02000
	XLOC_102721	-0.00675318	-0.0120612	-
	BnaA03g51010D	0.00634415	0.0122802	CAD5
	BnaC06g36000D	-0.00588368	-0.0125051	ZHD5
	BnaA09g54600D	0.00723358	-0.011775	-
	BnaC01g40540D	0.0059088	0.0124921	CAT4
	BnaA07g38570D	-0.00689774	0.011974	-
	BnaC05g13930D	0.00634925	0.0122731	GSPT1
	BnaA01g24940D	0.00608082	0.012408	TT12
	BnaA07g22050D	0.00677488	-0.0120428	NFD4
	BnaC01g07640D	0.0074745	-0.0116201	DYW9
	BnaC08g01860D	-0.00743346	0.0116451	PYRAB06230
	BnaA08g17370D	0.00658181	0.0121455	ABCC1
	BnaA10g14130D	-0.00719474	-0.0117887	-
	BnaA04g12790D	-0.0064391	0.0122162	CYP79B3
	BnaAnng17040D	-0.00538598	-0.0127155	SUMO5
	BnaA01g00320D	0.00672547	-0.0120603	HHP4
	BnaA08g24080D	-0.00686918	0.0119754	DAO
	BnaC02g18950D	0.00737886	-0.0116641	CCX2
	BnaC05g37530D	0.00631336	0.0122701	-
	BnaA01g07000D	0.00680704	0.0119998	tbc1d5A
	XLOC_066145	0.00676185	0.0120243	RH30
	BnaC09g12180D	0.00760113	-0.0115066	UGE4
	BnaA08g20300D	0.00679795	0.0119973	ALDH2B7
	BnaA05g20720D	-0.00681526	-0.0119844	At1g33811
	BnaA03g23170D	-0.0069696	0.0118936	-
	BnaC02g30930D	0.00713713	0.0117937	ERF9
	BnaA02g05750D	-0.00640054	-0.0122072	At3g17210
	BnaA08g27000D	0.00574439	0.012529	AXR1
	BnaC09g49220D	0.00574439	0.012529	AXR1
	BnaC01g06090D	0.00710697	-0.0118073	CESA1
	BnaC09g19820D	-0.00675829	0.0120074	JMJ706
	BnaA09g36120D	-0.00669045	-0.0120412	v1g172254
	BnaA07g38070D	0.00637714	0.0122098	SKIP4
	BnaC09g37560D	0.00725201	-0.0117088	BCB
	BnaC04g38560D	-0.00677086	-0.0119888	AGO4
	BnaC04g03810D	-0.00715126	0.0117643	At1g04910
	XLOC_041188	-0.00626973	0.0122556	-
	BnaA04g21850D	0.00642445	0.0121726	CAX1
	BnaC09g07510D	-0.00669106	-0.0120245	RALFL34
	BnaC03g39290D	0.00658641	0.0120803	ROD1
	BnaA10g23700D	0.00605709	0.0123525	RBL3
	BnaC02g25740D	0.00682713	0.0119429	YTHDF2
	BnaC01g15290D	0.00692198	-0.0118879	-
	BnaC04g01360D	0.00589318	0.0124293	-
	BnaC06g23040D	-0.00694799	-0.0118718	MYB122
	BnaA10g25360D	-0.00662413	0.0120548	Dhx36
	BnaC03g10860D	-0.00707869	0.0117915	Zpr1
	BnaC04g50950D	-0.00655762	0.0120877	CYTB5-C
	BnaA03g10420D	0.00523318	-0.0127152	At1g06890
	BnaA09g16180D	-0.00518908	0.012729	At5g03610
	BnaC01g44160D	0.00629889	0.012215	IAA26
	XLOC_006645	-0.0071601	-0.011731	-
	BnaC08g35890D	-0.00656562	0.0120716	S6PDH
	BnaA07g11050D	0.00670846	0.0119918	At3g43660
	BnaC04g17060D	0.00615714	0.0122827	-
	BnaC02g34990D	0.00735104	-0.0116048	WRKY3
	BnaC09g21870D	-0.007011	-0.0118115	PSBQ2
	BnaA08g10050D	-0.00572256	0.0124844	-
	BnaA04g11140D	0.0068559	-0.0118985	-
	BnaC05g42230D	-0.00710213	0.0117528	-
	BnaC03g35040D	-0.0072622	0.0116505	-
	XLOC_099880	-0.00675197	-0.0119514	IP5P3
	BnaC09g43730D	-0.00707725	0.0117617	At1g10890
	BnaA10g24260D	0.00713624	-0.0117246	TBR
	BnaA06g16060D	-0.00688566	-0.0118725	IQD1
	BnaA08g22390D	0.00663345	0.0120108	SEC31A
	BnaA03g05580D	0.00628397	-0.012195	RGP2
	BnaA03g34150D	0.00713086	0.0117145	AHP4
	BnaA09g34280D	-0.00619662	-0.0122306	nep1
	BnaA06g06760D	-0.00688161	-0.0118585	FD2
	BnaC03g76850D	0.00513179	-0.0127133	TL1
	BnaA09g10740D	0.00571905	0.0124583	-
	BnaA09g25910D	-0.00710244	-0.0117231	EMB2279
	BnaA09g27060D	-0.00677769	-0.0119132	RPL34
	BnaA06g31830D	-0.00712187	-0.0117034	RPL12A
	BnaA09g23790D	-0.00650705	0.012055	FAX4
	BnaC01g31020D	-0.00685119	0.0118611	MYB4
	XLOC_065727	-0.00542652	0.0125754	-
	BnaC02g46370D	0.00695114	0.0117992	RABB1B
	BnaA01g29240D	-0.00623338	-0.0121927	CYP72A15
	BnaAnng19440D	0.00579075	0.0124065	UGT74F2
	BnaCnng75490D	0.00601772	0.012293	NIT2
	BnaC01g14900D	-0.00744294	0.0114836	-
	BnaC02g19910D	-0.00671058	0.0119258	CRK2
	BnaA01g00920D	-0.00574934	-0.0124159	ARR18
	BnaC06g17900D	-0.00686715	-0.0118338	RPL34
	BnaC03g36700D	-0.00727873	0.0115832	Chmp5
	BnaC05g14830D	0.00655497	0.0120061	-
	BnaA05g11810D	-0.00724904	-0.0115982	PSBP1
	BnaA06g07010D	-0.00678854	-0.0118733	At1g11330
	BnaC05g20840D	-0.0070242	-0.0117352	MAP70.2
	BnaA04g22100D	0.00642117	0.0120752	At2g38640
	BnaC01g27670D	0.0071026	-0.0116851	HISN1A
	BnaC08g30070D	0.00698887	-0.0117497	-
	BnaA09g35820D	-0.00693666	-0.01178	IRK
	BnaC09g32680D	-0.00664783	0.0119446	CIPK21
	BnaCnng44700D	-0.00732806	0.0115327	SIP5
	BnaA09g38680D	0.00616485	0.0121912	SAUR36
	XLOC_038077	0.00599511	0.0122744	-
	BnaCnng14630D	0.00664011	0.0119371	NYC1
	BnaA03g60000D	0.00625053	0.0121453	GES
	BnaC03g64750D	0.00650276	0.0120103	RPP1
	BnaC06g40460D	-0.00588745	-0.0123218	-
	BnaA01g16440D	-0.00644981	-0.0120367	PORB
	BnaCnng67520D	0.00703419	0.0117038	GPX6
	BnaA07g33070D	0.0057738	0.0123651	At1g76800
	XLOC_032958	-0.00670436	0.0118843	At1g60730
	BnaA03g11290D	-0.00650403	-0.0119923	TPK1
	BnaA01g31950D	-0.00620488	-0.0121449	GAST1
[truncated: 38,324 more rows]
