# Supplementary material for: Characterization of cold stress responses in different rapeseed ecotypes based on metabolomics and transcriptomics analyses
Source: PeerJ. 2020 Mar 31;8:e8704. doi: 10.7717/peerj.8704 (PMC7120054; doi:10.7717/peerj.8704)
Supplement: Supplemental Information 19 [file peerj-08-8704-s019.xlsx]

## Sheet: S17
Table S17 DEGs related to signal transduction process identified in winter and spring B. napus ecotypes after cold stress.
	Genes	Log2 fold change-winter	Log2 fold change-spring	Bin code	Bin name	Discriptions
Common
	BnaA03g53230D	-10.1548	-4.33475	30.3	signalling.calcium	calcium dependent protein kinase 6 (CPK6)
	BnaA03g52310D	-8.14636	-9.02237	30.3	signalling.calcium	calcineurin B-like protein 10 (CBL10)
	BnaA02g24990D	-6.10154	-2.3505	30.3	signalling.calcium	calcineurin B-like protein 9 (CBL9)
	BnaC09g24410D	-3.96809	-3.39895	30.3	signalling.calcium	calcium-dependent protein kinase 17 (CPK17)
	BnaA03g53250D	-3.79307	-3.4613	30.3	signalling.calcium	calmodulin-domain protein kinase 5 (CPK5)
	BnaC06g35560D	-3.77115	-2.28102	30.3	signalling.calcium	calcium-dependent protein kinase 30 (CPK30)
	BnaC07g44060D	-3.12761	-2.35252	30.3	signalling.calcium	calcineurin B-like protein 10 (CBL10)
	BnaA07g31710D	-2.89724	-2.25939	30.3	signalling.calcium	calcium-dependent protein kinase 30 (CPK30)
	BnaA09g36820D	-2.66918	-4.46643	30.3	signalling.calcium	calcium-dependent protein kinase 32 (CPK32)
	BnaA03g41500D	-2.56407	-2.2193	30.3	signalling.calcium	calcium-dependent protein kinase 13 (CPK13)
	BnaA04g05940D	-2.33779	-2.09207	30.3	signalling.calcium	calcium-dependent protein kinase 13 (CPK13)
	BnaA01g23490D	-2.31808	-3.9386	30.3	signalling.calcium	calcium-dependent protein kinase 15 (CPK15)
	BnaC02g33120D	-2.18842	-3.2412	30.3	signalling.calcium	calcineurin B-like protein 9 (CBL9)
	BnaA03g44570D	-2.18595	-3.32432	30.3	signalling.calcium	calmodulin like 42 (CML42)
	BnaA04g26710D	-2.14018	-2.3165	30.3	signalling.calcium	CDPK-related kinase 3 (CRK3)
	BnaC07g32550D	-2.08578	-1.78662	30.3	signalling.calcium	calcium-dependent protein kinase 13 (CPK13)
	BnaA09g32390D	-2.04272	-2.15286	30.3	signalling.calcium	calcium-dependent protein kinase 13 (CPK13)
	BnaC08g23190D	-2.03758	-1.47723	30.3	signalling.calcium	calcium-dependent protein kinase 13 (CPK13)
	BnaC07g36400D	-2.00682	-5.55296	30.3	signalling.calcium	calmodulin like 42 (CML42)
	BnaC02g08720D	-2.00287	-1.49979	30.3	signalling.calcium	calcium-dependent protein kinase 19 (CDPK19)
	BnaCnng10830D	-1.93974	-4.77206	30.3	signalling.calcium	calmodulin-domain protein kinase 9 (CPK9)
	BnaC09g22660D	-1.8375	-1.27739	30.3	signalling.calcium	calcium-dependent protein kinase 22 (CPK22)
	BnaC01g21810D	-1.7757	-2.34017	30.3	signalling.calcium	calcineurin B-like protein 6 (CBL6)
	BnaA01g03880D	-1.68635	-1.19134	30.3	signalling.calcium	calcineurin B-like protein 10 (CBL10)
	BnaC04g51710D	-1.5661	-1.57846	30.3	signalling.calcium	CDPK-related kinase 3 (CRK3)
	BnaC04g28550D	-1.55655	-1.05789	30.3	signalling.calcium	calcium-dependent protein kinase 13 (CPK13)
	BnaA03g48110D	-1.54771	-2.10178	30.3	signalling.calcium	calcineurin B-like 3 (CBL3)
	BnaC03g13890D	-1.50943	-1.40509	30.3	signalling.calcium	calcineurin B-like protein 2 (CBL2)
	BnaA02g04230D	-1.50767	-1.20305	30.3	signalling.calcium	calcium-dependent protein kinase 19 (CDPK19)
	BnaC04g38550D	-1.47994	-1.19837	30.3	signalling.calcium	calmodulin 5 (CAM5)
	BnaC07g16820D	-1.46514	-3.45924	30.3	signalling.calcium	calcium-dependent protein kinase 28 (CPK28)
	BnaCnng07350D	-1.3183	-2.59014	30.3	signalling.calcium	calcium-dependent protein kinase 32 (CPK32)
	BnaC07g40720D	-1.29148	-1.71305	30.3	signalling.calcium	calcineurin B-like 3 (CBL3)
	BnaA02g35430D	-1.07505	-1.52799	30.3	signalling.calcium	calcineurin B-like protein 2 (CBL2)
	BnaA09g36050D	-1.04239	-1.0141	30.3	signalling.calcium	calmodulin 5 (CAM5)
	BnaA03g40940D	1.13131	1.78641	30.3	signalling.calcium	calmodulin-like 41 (CML41)
	BnaA07g16960D	1.52782	1.63622	30.3	signalling.calcium	calmodulin 5 (CAM5)
	BnaCnng20380D	2.0058	1.32395	30.3	signalling.calcium	calmodulin 5 (CAM5)
	BnaC04g24860D	2.21443	1.07734	30.3	signalling.calcium	calmodulin 5 (CAM5)
	BnaC05g14600D	2.24205	1.05337	30.3	signalling.calcium	calcium-dependent protein kinase 1 (CDPK1)
	BnaA01g11790D	2.30997	2.1913	30.3	signalling.calcium	calcium-dependent protein kinase 15 (CPK15)
	BnaA01g08510D	2.52466	-1.45927	30.3	signalling.calcium	calcineurin B-like protein 1 (CBL1)
	BnaC01g13360D	2.56442	2.31684	30.3	signalling.calcium	calcium-dependent protein kinase 15 (CPK15)
	BnaA03g19320D	2.75161	1.54478	30.3	signalling.calcium	calmodulin 5 (CAM5)
	BnaA07g32970D	2.82627	1.93173	30.3	signalling.calcium	calmodulin-like 38 (CML38)
	BnaC01g31320D	2.9314	2.82688	30.3	signalling.calcium	calmodulin-like 11 (CML11)
	BnaA01g24320D	3.02995	1.27815	30.3	signalling.calcium	calmodulin-like 11 (CML11)
	BnaA03g43160D	3.13721	1.93591	30.3	signalling.calcium	calcineurin B-like protein 1 (CBL1)
	BnaC07g34450D	3.18596	1.92956	30.3	signalling.calcium	calcineurin B-like protein 1 (CBL1)
	BnaA08g15730D	3.25873	-11.2644	30.3	signalling.calcium	calcium ATPase 2 (ACA2)
	BnaA06g13080D	3.27716	1.69765	30.3	signalling.calcium	calcium-dependent protein kinase 1 (CDPK1)
	BnaA03g18230D	3.59991	1.922	30.3	signalling.calcium	calcium-dependent protein kinase 20 (CPK20)
	BnaC03g23130D	4.5982	2.90162	30.3	signalling.calcium	calmodulin 5 (CAM5)
	BnaA07g21300D	6.39443	2.65762	30.3	signalling.calcium	calmodulin-like 38 (CML38)
	BnaC04g21730D	-9.07682	-8.14636	30.6	signalling.MAP kinases	MAPK/ERK kinase kinase 1 (MEKK1)
	BnaA02g26910D	-1.10368	-4.1068	30.6	signalling.MAP kinases	MAP kinase 17 (MPK17)
	BnaC03g30930D	-2.5094	-2.73681	30.6	signalling.MAP kinases	MAPK/ERK kinase kinase 1 (MEKK1)
	BnaCnng01010D	-1.47615	-2.39147	30.6	signalling.MAP kinases	mitogen-activated protein kinase kinase kinase 7 (MAPKKK7)
	BnaA06g06010D	-3.13443	-2.30287	30.6	signalling.MAP kinases	mitogen-activated protein kinase 1 (ATMPK1)
	BnaC03g55440D	-1.36333	-2.2144	30.6	signalling.MAP kinases	mitogen-activated protein kinase 3 (MPK3)
	BnaC06g23550D	-2.96369	-2.13882	30.6	signalling.MAP kinases	MAP kinase kinase 9 (MKK9)
	BnaC03g09450D	-2.37954	-2.13337	30.6	signalling.MAP kinases	mitogen-activated protein kinase 16 (MPK16)
	BnaC05g07560D	-3.07973	-2.06602	30.6	signalling.MAP kinases	mitogen-activated protein kinase 1 (ATMPK1)
	BnaA06g00700D	-1.94877	-1.97924	30.6	signalling.MAP kinases	MAPK/ERK kinase kinase 1 (MEKK1)
	BnaC09g33150D	-3.45474	-1.8625	30.6	signalling.MAP kinases	MAP kinase kinase 6 (MKK6)
	BnaA07g22580D	-1.49501	-1.80177	30.6	signalling.MAP kinases	MAP kinase 15 (MPK15)
	BnaA09g18630D	-1.50071	-1.46468	30.6	signalling.MAP kinases	MAP kinase 17 (MPK17)
	BnaC07g20800D	-1.07764	-1.32554	30.6	signalling.MAP kinases	MAP kinase 17 (MPK17)
	BnaC07g40090D	-1.27673	-1.25273	30.6	signalling.MAP kinases	MAP kinase/ ERK kinase 1 (MEK1)
	BnaA02g35860D	-2.31178	-1.2457	30.6	signalling.MAP kinases	MAP kinase kinase 9 (MKK9)
	BnaC06g06600D	-1.41702	-1.16822	30.6	signalling.MAP kinases	MAPK/ERK kinase kinase 1 (MEKK1)
	BnaA03g10710D	2.3307	1.87262	30.6	signalling.MAP kinases	MAP kinase kinase 6 (MKK6)
	BnaC05g03130D	3.5395	1.96885	30.6	signalling.MAP kinases	mitogen-activated protein kinase kinase kinase 18 (MAPKKK18)
	BnaA05g24830D	2.68955	2.61788	30.6	signalling.MAP kinases	MAP kinase 19 (MPK19)
	BnaAnng12350D	5.50391	3.05178	30.6	signalling.MAP kinases	mitogen-activated protein kinase kinase kinase 18 (MAPKKK18)
	BnaC03g13390D	3.92226	3.4172	30.6	signalling.MAP kinases	MAP kinase kinase 6 (MKK6)
	BnaA01g25260D	1.9187	3.87321	30.6	signalling.MAP kinases	MAP kinase kinase 5 (MKK5)
	BnaC05g38860D	3.56932	4.07995	30.6	signalling.MAP kinases	MAP kinase 19 (MPK19)
	BnaA10g27890D	8.50515	8.16323	30.6	signalling.MAP kinases	mitogen-activated protein kinase kinase kinase 13 (MAPKKK13)
Winter-specific
	BnaA04g15350D	-5.49152		30.3	signalling.calcium	calmodulin-binding family protein
	BnaC04g38300D	-4.72271		30.3	signalling.calcium	calmodulin-binding family protein
	BnaA07g22510D	-4.24793		30.3	signalling.calcium	Calmodulin binding protein-like
	BnaA05g16760D	-2.87732		30.3	signalling.calcium	calmodulin-like 11 (CML11)
	BnaC02g11430D	-2.54097		30.3	signalling.calcium	Calmodulin-binding protein
	BnaC07g25760D	-2.16799		30.3	signalling.calcium	calmodulin-binding protein-related
	BnaA02g35270D	-1.99209		30.3	signalling.calcium	Calmodulin-binding protein
	BnaC02g37900D	-1.97809		30.3	signalling.calcium	calmodulin-binding protein-related
	BnaC06g12630D	-1.9472		30.3	signalling.calcium	calmodulin-binding protein-related
	BnaA08g11950D	-1.71699		30.3	signalling.calcium	calcineurin B-like protein 10 (CBL10)
	BnaA02g29820D	-1.6423		30.3	signalling.calcium	calmodulin-binding protein-related
	BnaC06g23400D	-1.50518		30.3	signalling.calcium	Calmodulin binding protein-like
	BnaC05g39710D	-1.49381		30.3	signalling.calcium	calmodulin-binding family protein
	BnaA03g54160D	-1.08285		30.3	signalling.calcium	calcium ATPase 2 (ACA2)
	BnaCnng22620D	-1.05297		30.3	signalling.calcium	Calmodulin-binding protein
	BnaC02g12710D	-1.00181		30.3	signalling.calcium	calcineurin B-like protein 2 (CBL2)
	BnaC01g03240D	1.09088		30.3	signalling.calcium	calmodulin-domain protein kinase 5 (CPK5)
	BnaC04g28440D	1.11728		30.3	signalling.calcium	calmodulin 9 (CAM9)
	BnaCnng30830D	1.12905		30.3	signalling.calcium	Calmodulin binding protein-like
	BnaAnng19720D	1.19455		30.3	signalling.calcium	calcineurin B-like protein 8 (CBL8)
	BnaA06g40890D	1.59623		30.3	signalling.calcium	calcium-dependent protein kinase 26 (CPK26)
	BnaC09g09270D	1.65648		30.3	signalling.calcium	calcium dependent protein kinase 6 (CPK6)
	BnaA09g44420D	1.93437		30.3	signalling.calcium	calcium-dependent protein kinase 1 (CDPK1)
	BnaA09g09050D	1.96103		30.3	signalling.calcium	calcium dependent protein kinase 6 (CPK6)
	BnaC09g44200D	2.01219		30.3	signalling.calcium	calmodulin-domain protein kinase 7 (CPK7)
	BnaA05g11330D	2.05889		30.3	signalling.calcium	calcium-dependent protein kinase 22 (CPK22)
	BnaC09g50440D	2.07104		30.3	signalling.calcium	calcium dependent protein kinase 1 (CPK1)
	BnaC08g36980D	2.10831		30.3	signalling.calcium	calcium-dependent protein kinase 1 (CDPK1)
	BnaC06g37490D	2.1087		30.3	signalling.calcium	calmodulin-like 38 (CML38)
	BnaA04g02760D	2.44101		30.3	signalling.calcium	calmodulin 5 (CAM5)
	BnaA06g22060D	2.8705		30.3	signalling.calcium	Calmodulin binding protein-like
	BnaC01g07370D	3.12293		30.3	signalling.calcium	Calmodulin-binding protein
	BnaC06g21690D	3.51412		30.3	signalling.calcium	calmodulin-like 38 (CML38)
	BnaA01g06120D	4.72322		30.3	signalling.calcium	Calmodulin-binding protein
	BnaC03g38020D	9.04075		30.3	signalling.calcium	calmodulin-binding family protein
	BnaA03g16730D	10.388		30.3	signalling.calcium	calmodulin-like 38 (CML38)
	BnaCnng76780D	10.388		30.3	signalling.calcium	calmodulin-like 38 (CML38)
	BnaA02g34610D	-4.06465		30.6	signalling.MAP kinases	mitogen-activated protein kinase kinase kinase 5 (MAPKKK5)
	BnaA07g22640D	-2.51676		30.6	signalling.MAP kinases	MAP kinase kinase 9 (MKK9)
	BnaC09g25820D	-2.42196		30.6	signalling.MAP kinases	MAP kinase kinase 2 (MKK2)
	BnaAnng22780D	-1.63711		30.6	signalling.MAP kinases	mitogen-activated protein kinase 16 (MPK16)
	BnaA09g09520D	-1.58139		30.6	signalling.MAP kinases	MAP kinase 7 (MPK7)
	BnaC02g22230D	-1.33351		30.6	signalling.MAP kinases	MAP kinase kinase 9 (MKK9)
	BnaC06g23500D	-1.23538		30.6	signalling.MAP kinases	MAP kinase 15 (MPK15)
	BnaCnng17720D	-1.22658		30.6	signalling.MAP kinases	MAP kinase 9 (MPK9)
	BnaC03g35620D	-1.19814		30.6	signalling.MAP kinases	mitogen-activated protein kinase kinase kinase 7 (MAPKKK7)
	BnaC09g09670D	-1.18998		30.6	signalling.MAP kinases	MAP kinase 7 (MPK7)
	BnaA04g10280D	-1.15854		30.6	signalling.MAP kinases	mitogen-activated protein kinase kinase 3 (MKK3)
	BnaA03g32870D	-1.15699		30.6	signalling.MAP kinases	mitogen-activated protein kinase kinase kinase 7 (MAPKKK7)
	BnaC03g41990D	-1.00191		30.6	signalling.MAP kinases	MAP kinase kinase 5 (MKK5)
	BnaA05g14400D	1.01359		30.6	signalling.MAP kinases	mitogen-activated protein kinase 18 (MPK18)
	BnaAnng04440D	1.06298		30.6	signalling.MAP kinases	MAPK/ERK kinase kinase 1 (MEKK1)
	BnaA09g21830D	1.54487		30.6	signalling.MAP kinases	MAP kinase 5 (MPK5)
	BnaC09g25280D	1.59688		30.6	signalling.MAP kinases	MAPK/ERK kinase kinase 1 (MEKK1)
	BnaC09g33900D	2.30842		30.6	signalling.MAP kinases	mitogen-activated protein kinase kinase kinase 13 (MAPKKK13)
	BnaC05g04950D	3.19878		30.6	signalling.MAP kinases	mitogen-activated protein kinase kinase kinase 13 (MAPKKK13)
Spring-specific
	BnaC03g05340D		-8.51833	30.3	signalling.calcium	calcium-dependent protein kinase 17 (CPK17)
	BnaA02g22690D		-7.75405	30.3	signalling.calcium	calmodulin like 43 (CML43)
	BnaA02g01160D		-7.16323	30.3	signalling.calcium	calcium-dependent protein kinase 17 (CPK17)
	BnaA07g12770D		-3.95799	30.3	signalling.calcium	calcium-dependent protein kinase 28 (CPK28)
	BnaA02g04170D		-3.68182	30.3	signalling.calcium	calcium-dependent protein kinase 34 (CPK34)
	BnaAnng36110D		-3.33286	30.3	signalling.calcium	calcium-dependent protein kinase 28 (CPK28)
	BnaC01g10210D		-3.19163	30.3	signalling.calcium	calcineurin B-like protein 1 (CBL1)
	BnaC03g47560D		-2.96683	30.3	signalling.calcium	calcium dependent protein kinase 6 (CPK6)
	BnaC01g12230D		-2.52832	30.3	signalling.calcium	calmodulin like 42 (CML42)
	BnaA09g53510D		-2.51532	30.3	signalling.calcium	calmodulin like 37 (CML37)
	BnaC08g28520D		-2.33842	30.3	signalling.calcium	calcium-dependent protein kinase 32 (CPK32)
	BnaA03g01490D		-2.2003	30.3	signalling.calcium	calcium dependent protein kinase 1 (CPK1)
	BnaC09g08180D		-1.86275	30.3	signalling.calcium	calcium-dependent protein kinase 28 (CPK28)
	BnaA03g35770D		-1.69247	30.3	signalling.calcium	calmodulin-domain protein kinase 9 (CPK9)
	BnaC07g45520D		-1.61606	30.3	signalling.calcium	calmodulin-domain protein kinase 5 (CPK5)
	BnaC03g41610D		-1.54503	30.3	signalling.calcium	calmodulin-domain protein kinase 9 (CPK9)
	BnaA01g10690D		-1.51614	30.3	signalling.calcium	calmodulin like 42 (CML42)
	BnaC03g01790D		-1.45882	30.3	signalling.calcium	calcium dependent protein kinase 1 (CPK1)
	BnaA07g17350D		-1.40765	30.3	signalling.calcium	calcium-dependent protein kinase 32 (CPK32)
	BnaA09g20300D		-1.35614	30.3	signalling.calcium	calcium-dependent protein kinase 22 (CPK22)
	BnaC03g66810D		-1.21308	30.3	signalling.calcium	calcineurin B-like protein 10 (CBL10)
	BnaA09g08020D		-1.00486	30.3	signalling.calcium	calcium-dependent protein kinase 28 (CPK28)
	BnaCnng69860D		1.42807	30.3	signalling.calcium	calmodulin-like 41 (CML41)
	BnaA10g29980D		1.60401	30.3	signalling.calcium	calmodulin-domain protein kinase 7 (CPK7)
	BnaCnng34240D		2.34577	30.3	signalling.calcium	calcium-dependent protein kinase 26 (CPK26)
	BnaA04g01520D		-7.86625	30.6	signalling.MAP kinases	MAP kinase 10 (MPK10)
	BnaA10g29440D		-3.48113	30.6	signalling.MAP kinases	mitogen-activated protein kinase kinase kinase 13 (MAPKKK13)
	BnaC02g47660D		-3.24632	30.6	signalling.MAP kinases	MAP kinase 17 (MPK17)
	BnaA06g18440D		-1.7345	30.6	signalling.MAP kinases	mitogen-activated protein kinase 3 (MPK3)
	BnaAnng30700D		-1.71689	30.6	signalling.MAP kinases	MAPK/ERK kinase kinase 1 (MEKK1)
	BnaA01g21880D		-1.2518	30.6	signalling.MAP kinases	mitogen-activated protein kinase homolog 2 (MPK2)
	BnaA03g30290D		-1.1503	30.6	signalling.MAP kinases	mitogen-activated protein kinase kinase kinase 7 (MAPKKK7)
	BnaC03g28150D		-1.00328	30.6	signalling.MAP kinases	MAPK/ERK kinase kinase 1 (MEKK1)
	BnaC01g28210D		-1.00149	30.6	signalling.MAP kinases	mitogen-activated protein kinase homolog 2 (MPK2)
	BnaC07g16520D		1.13916	30.6	signalling.MAP kinases	mitogen-activated protein kinase kinase kinase 5 (MAPKKK5)
	BnaA03g38420D		1.26256	30.6	signalling.MAP kinases	mitogen-activated protein kinase kinase kinase 3 (MAP3KA)
	BnaC01g36660D		2.66415	30.6	signalling.MAP kinases	MAP kinase 19 (MPK19)
	BnaC01g32150D		8.05889	30.6	signalling.MAP kinases	MAP kinase kinase 5 (MKK5)
